# Supplementary material for: The molecular mechanism on suppression of climacteric fruit ripening with postharvest wax coating treatment via transcriptome
Source: Front Plant Sci. 2022 Aug 15;13:978013. doi: 10.3389/fpls.2022.978013 (PMC9421051; doi:10.3389/fpls.2022.978013)
Supplement: Supplementary file 2 [file Table_2.XLSX]

## Sheet: summary
Transcriptome up- and down-regulation in 2020 and 2021 after wax treatment
	2020 year	2021 year
Up-regulation	1725	3403
Down-regulation	2019	3374
Total DEGs	3744	6777
Log2FC>1,Log2FC<-1
PValue<0.05

## Sheet: 2020-Up DEGs
Gene id	GO	KEGG	KO_ENTRY	EC	Description	FPKM.Control-1	FPKM.Waxed-1	FC	Log2FC	Pvalue	qval
MD00G1005700	GO:0005737(cytoplasm);GO:0005829(cytosol);GO:0005886(plasma membrane);GO:0008270(zinc ion binding);GO:0009506(plasmodesma);GO:0031966(mitochondrial membrane);GO:0055114(oxidation-reduction process)	00040(Pentose and glucuronate interconversions);00051(Fructose and mannose metabolism)	K00008	EC:1.1.1.14	PREDICTED: sorbitol dehydrogenase-like [Pyrus x bretschneideri]	5.04067	29.9231	5.93633	2.56957	0.000322931	0.00919608
MD00G1009000	GO:0003984(acetolactate synthase activity);GO:0005829(cytosol);GO:0006551(leucine metabolic process);GO:0006573(valine metabolic process);GO:0009082(branched-chain amino acid biosynthetic process);GO:0009097(isoleucine biosynthetic process);GO:0009099(valine biosynthetic process);GO:0009507(chloroplast);GO:0016597(amino acid binding)	01210(2-Oxocarboxylic acid metabolism);01230(Biosynthesis of amino acids);00650(Butanoate metabolism);00660(C5-Branched dibasic acid metabolism);00290(Valine, leucine and isoleucine biosynthesis);00770(Pantothenate and CoA biosynthesis)	K01653	EC:2.2.1.6	PREDICTED: acetolactate synthase small subunit 1, chloroplastic-like [Pyrus x bretschneideri]	69.806	218.148	3.12506	1.64388	0.0193461	0.171867
MD00G1012200	GO:0004807(triose-phosphate isomerase activity);GO:0005829(cytosol);GO:0006094(gluconeogenesis);GO:0006096(glycolytic process);GO:0019563(glycerol catabolic process);GO:0046166(glyceraldehyde-3-phosphate biosynthetic process)	01200(Carbon metabolism);01230(Biosynthesis of amino acids);00010(Glycolysis / Gluconeogenesis);00051(Fructose and mannose metabolism);00562(Inositol phosphate metabolism);00710(Carbon fixation in photosynthetic organisms)	K01803	EC:5.3.1.1	PREDICTED: triosephosphate isomerase, cytosolic [Pyrus x bretschneideri]	1.95569	10.5555	5.39734	2.43225	0.000707493	0.0165053
MD00G1015800	GO:0005575(cellular_component);GO:0008150(biological_process)	NA	NA	NA	PREDICTED: LOB domain-containing protein 37-like [Malus domestica]	3.7625	11.0857	2.94636	1.55893	0.0279086	0.217811
MD00G1018700	GO:0001666(response to hypoxia);GO:0005344(oxygen transporter activity);GO:0005618(cell wall);GO:0005737(cytoplasm);GO:0005829(cytosol);GO:0005886(plasma membrane);GO:0009506(plasmodesma);GO:0019825(oxygen binding);GO:0020037(heme binding);GO:0046872(metal ion binding)	NA	NA	NA	beta-galactosidase [Malus domestica]	21.638	136.23	6.29585	2.6544	0.000202546	0.00641499
MD00G1025800	GO:0005634(nucleus);GO:0006633(fatty acid biosynthetic process);GO:0009409(response to cold);GO:0009416(response to light stimulus);GO:0016021(integral component of membrane);GO:0016747(transferase activity, transferring acyl groups other than amino-acyl groups)	00062(Fatty acid elongation)	K15397	EC:2.3.1.199	PREDICTED: 3-ketoacyl-CoA synthase 11-like [Pyrus x bretschneideri]	1.99476	12.1283	6.08011	2.6041	0.000284544	0.00832164
MD00G1026000	GO:0005515(protein binding)	04141(Protein processing in endoplasmic reticulum)	K08852	EC:2.7.11.1;EC:3.1.26.-	PREDICTED: TMV resistance protein N-like [Malus domestica]	1.27693	4.03274	3.15815	1.65908	0.0253393	0.205765
MD00G1027200	NA	NA	NA	NA	PREDICTED: uncharacterized protein LOC108170057 [Malus domestica]	1.08751	3.82444	3.51671	1.81422	0.0117744	0.12515
MD00G1032200	GO:0047037(salutaridine reductase (NADPH) activity);GO:0050661(NADP binding);GO:0097295(morphine biosynthetic process)	00902(Monoterpenoid biosynthesis)	K15095	EC:1.1.1.208	PREDICTED: (+)-neomenthol dehydrogenase-like isoform X2 [Malus domestica]	2.1716	9.60327	4.4222	2.14476	0.00270679	0.0438049
MD00G1034500	GO:0005739(mitochondrion);GO:0005773(vacuole);GO:0008150(biological_process);GO:0008289(lipid binding);GO:0016021(integral component of membrane)	NA	NA	NA	PREDICTED: uncharacterized protein LOC103454832 [Malus domestica]	10.5619	27.7101	2.6236	1.39155	0.0487158	0.300634
MD00G1037600	GO:0016020(membrane);GO:0016709(oxidoreductase activity, acting on paired donors, with incorporation or reduction of molecular oxygen, NAD(P)H as one donor, and incorporation of one atom of oxygen);GO:0044550(secondary metabolite biosynthetic process)	00903(Limonene and pinene degradation);00945(Stilbenoid, diarylheptanoid and gingerol biosynthesis)	K00517	NA	PREDICTED: cytochrome P450 82A3-like [Malus domestica]	1.67604	8.03306	4.79289	2.26089	0.00190365	0.0337467
MD00G1039200	NA	NA	NA	NA	-	4.48658	21.566	4.80679	2.26507	0.00139037	0.0272406
MD00G1040000	GO:0004332(fructose-bisphosphate aldolase activity);GO:0006096(glycolytic process);GO:0006098(pentose-phosphate shunt);GO:0009507(chloroplast);GO:0009570(chloroplast stroma);GO:0009579(thylakoid);GO:0009737(response to abscisic acid);GO:0009941(chloroplast envelope);GO:0010287(plastoglobule);GO:0016020(membrane);GO:0046686(response to cadmium ion);GO:0048046(apoplast)	01200(Carbon metabolism);01230(Biosynthesis of amino acids);00010(Glycolysis / Gluconeogenesis);00030(Pentose phosphate pathway);00051(Fructose and mannose metabolism);00710(Carbon fixation in photosynthetic organisms)	K01623	EC:4.1.2.13	PREDICTED: fructose-bisphosphate aldolase 1, chloroplastic [Malus domestica]	25.6182	256.891	10.0277	3.32591	5.13658e-06	0.00036053
MD00G1044500	NA	NA	NA	NA	PREDICTED: cyclin-dependent kinase inhibitor 6-like [Malus domestica]	1.60762	6.83244	4.25003	2.08747	0.00380953	0.0558135
MD00G1051100	NA	NA	NA	NA	-	104.853	350.984	3.34741	1.74304	0.0131654	0.134857
MD00G1053600	NA	NA	NA	NA	PREDICTED: uncharacterized protein LOC108867596 [Pyrus x bretschneideri]	1.47408	14.2925	9.69593	3.27738	9.38194e-06	0.000582981
MD00G1059700	GO:0004420(hydroxymethylglutaryl-CoA reductase (NADPH) activity);GO:0005778(peroxisomal membrane);GO:0005789(endoplasmic reticulum membrane);GO:0008299(isoprenoid biosynthetic process);GO:0016126(sterol biosynthetic process)	00900(Terpenoid backbone biosynthesis)	K00021	EC:1.1.1.34	3-hydroxy-3-methylglutaryl coenzyme A reductase, partial [Malus domestica]	16.0376	116.048	7.23599	2.85519	7.16077e-05	0.00289815
MD00G1062300	GO:0005788(endoplasmic reticulum lumen);GO:0006457(protein folding);GO:0009408(response to heat);GO:0009506(plasmodesma);GO:0009860(pollen tube growth);GO:0016491(oxidoreductase activity);GO:0034605(cellular response to heat)	04141(Protein processing in endoplasmic reticulum)	K09517	NA	PREDICTED: dnaJ protein ERDJ3A [Malus domestica]	0.731925	2.11028	2.8832	1.52767	0.0356035	0.252762
MD00G1063500	GO:0004674(protein serine/threonine kinase activity);GO:0005886(plasma membrane)	04075(Plant hormone signal transduction);04626(Plant-pathogen interaction)	K13416	EC:2.7.10.1;EC:2.7.11.1	PREDICTED: probable receptor-like protein kinase At1g11050 [Malus domestica]	1.37147	5.92483	4.32004	2.11104	0.00314352	0.0486023
MD00G1065300	GO:0004843(thiol-dependent ubiquitin-specific protease activity);GO:0005634(nucleus);GO:0005829(cytosol);GO:0006511(ubiquitin-dependent protein catabolic process);GO:0009506(plasmodesma);GO:0016579(protein deubiquitination);GO:0036459(thiol-dependent ubiquitinyl hydrolase activity)	NA	NA	NA	PREDICTED: uncharacterized protein LOC103438635 [Malus domestica]	17.9223	51.846	2.89282	1.53247	0.0294326	0.225246
MD00G1068500	GO:0004849(uridine kinase activity);GO:0005829(cytosol);GO:0006206(pyrimidine nucleobase metabolic process);GO:0009507(chloroplast);GO:0043097(pyrimidine nucleoside salvage)	01200(Carbon metabolism);00710(Carbon fixation in photosynthetic organisms)	K00855	EC:2.7.1.19	PREDICTED: phosphoribulokinase, chloroplastic-like [Pyrus x bretschneideri]	3.6205	13.4281	3.7089	1.89099	0.00753997	0.0923
MD00G1069900	NA	NA	NA	NA	-	6.30044	110.57	17.5496	4.13337	4.45448e-08	7.54523e-06
MD00G1072200	GO:0004069(L-aspartate:2-oxoglutarate aminotransferase activity);GO:0006520(cellular amino acid metabolic process);GO:0008483(transaminase activity);GO:0008793(aromatic-amino-acid:2-oxoglutarate aminotransferase activity);GO:0009058(biosynthetic process);GO:0009693(ethylene biosynthetic process);GO:0016847(1-aminocyclopropane-1-carboxylate synthase activity);GO:0030170(pyridoxal phosphate binding)	00270(Cysteine and methionine metabolism)	K01762	EC:4.4.1.14	PREDICTED: probable aminotransferase ACS10 [Pyrus x bretschneideri]	4.34113	11.4665	2.64135	1.40128	0.0485874	0.300364
MD00G1075100	GO:0005634(nucleus);GO:0005737(cytoplasm);GO:0005874(microtubule);GO:0007010(cytoskeleton organization);GO:0008017(microtubule binding)	NA	NA	NA	PREDICTED: microtubule-associated protein 70-2-like isoform X1 [Pyrus x bretschneideri]	0.496809	1.62915	3.27924	1.71336	0.0184523	0.166646
MD00G1076700	GO:0004040(amidase activity);GO:0016884(carbon-nitrogen ligase activity, with glutamine as amido-N-donor)	00970(Aminoacyl-tRNA biosynthesis)	K02433	EC:6.3.5.6;EC:6.3.5.7	PREDICTED: glutamyl-tRNA(Gln) amidotransferase subunit A-like [Malus domestica]	1.51856	4.50216	2.96475	1.56791	0.02735	0.214675
MD00G1078600	GO:0005634(nucleus);GO:0005739(mitochondrion);GO:0009553(embryo sac development);GO:0009567(double fertilization forming a zygote and endosperm);GO:0080173(male-female gamete recognition during double fertilization)	NA	NA	NA	PREDICTED: ankyrin-1-like [Pyrus x bretschneideri]	27.2149	86.8038	3.18957	1.67336	0.0173715	0.159403
MD00G1079100	GO:0004674(protein serine/threonine kinase activity);GO:0005524(ATP binding);GO:0005886(plasma membrane);GO:0006468(protein phosphorylation);GO:0007169(transmembrane receptor protein tyrosine kinase signaling pathway);GO:0009507(chloroplast);GO:0016021(integral component of membrane);GO:0016301(kinase activity)	04626(Plant-pathogen interaction)	K13428	EC:2.7.11.1	PREDICTED: probable LRR receptor-like serine/threonine-protein kinase At3g47570 [Pyrus x bretschneideri]	0.500047	1.57148	3.14267	1.65199	0.0222364	0.188809
MD00G1082100	GO:0001653(peptide receptor activity);GO:0004674(protein serine/threonine kinase activity);GO:0004888(transmembrane signaling receptor activity);GO:0005515(protein binding);GO:0005524(ATP binding);GO:0005886(plasma membrane);GO:0006468(protein phosphorylation);GO:0007169(transmembrane receptor protein tyrosine kinase signaling pathway);GO:0009611(response to wounding);GO:0009826(unidimensional ce…	NA	NA	NA	PREDICTED: receptor-like protein 2 [Malus domestica]	0.432947	3.40109	7.85568	2.97374	5.55641e-05	0.00240186
MD00G1087700	GO:0005886(plasma membrane);GO:0016021(integral component of membrane)	NA	NA	NA	PREDICTED: ankyrin repeat-containing protein At5g02620-like [Malus domestica]	6.28211	19.7144	3.13819	1.64993	0.0191547	0.170565
MD00G1092000	NA	NA	NA	NA	PREDICTED: AP2-like ethylene-responsive transcription factor AIL1 [Pyrus x bretschneideri]	1.28988	4.15491	3.22116	1.68758	0.0198976	0.174798
MD00G1095700	GO:0005737(cytoplasm);GO:0005829(cytosol);GO:0009055(electron carrier activity);GO:0009408(response to heat);GO:0009926(auxin polar transport);GO:0015035(protein disulfide oxidoreductase activity);GO:0045454(cell redox homeostasis);GO:0046872(metal ion binding);GO:0051537(2 iron, 2 sulfur cluster binding);GO:0051726(regulation of cell cycle);GO:0072593(reactive oxygen species metabolic process)	01200(Carbon metabolism);01230(Biosynthesis of amino acids);00010(Glycolysis / Gluconeogenesis);00030(Pentose phosphate pathway);00051(Fructose and mannose metabolism);00710(Carbon fixation in photosynthetic organisms)	K01623	EC:4.1.2.13	PREDICTED: monothiol glutaredoxin-S17 [Malus domestica]	29.8065	181.416	6.08645	2.6056	0.000256598	0.00769019
MD00G1096000	GO:0004842(ubiquitin-protein transferase activity);GO:0005515(protein binding);GO:0005789(endoplasmic reticulum membrane);GO:0006970(response to osmotic stress);GO:0009409(response to cold);GO:0009414(response to water deprivation);GO:0009611(response to wounding);GO:0009723(response to ethylene);GO:0016567(protein ubiquitination);GO:0043161(proteasome-mediated ubiquitin-dependent protein catabol…	04141(Protein processing in endoplasmic reticulum)	K10666	EC:2.3.2.27	PREDICTED: E3 ubiquitin-protein ligase RMA1H1-like [Malus domestica]	7.69554	21.2435	2.76049	1.46493	0.0388472	0.265018
MD00G1105000	GO:0004857(enzyme inhibitor activity)	00040(Pentose and glucuronate interconversions);00500(Starch and sucrose metabolism)	K01051	EC:3.1.1.11	PREDICTED: 21 kDa protein [Malus domestica]	1.76242	5.02261	2.84983	1.51088	0.0422241	0.276976
MD00G1107700	GO:0003677(DNA binding);GO:0005515(protein binding);GO:0009507(chloroplast);GO:0009534(chloroplast thylakoid);GO:0009535(chloroplast thylakoid membrane);GO:0009658(chloroplast organization);GO:0009706(chloroplast inner membrane);GO:0009941(chloroplast envelope);GO:0015979(photosynthesis);GO:0015995(chlorophyll biosynthetic process);GO:0046872(metal ion binding);GO:0048529(magnesium-protoporphyrin…	00860(Porphyrin and chlorophyll metabolism)	K04035	EC:1.14.13.81	hypothetical protein PRUPE_ppa007723mg [Prunus persica]	45.8333	125.216	2.73199	1.44995	0.0404608	0.271053
MD00G1107800	GO:0003677(DNA binding);GO:0005515(protein binding);GO:0009507(chloroplast);GO:0009534(chloroplast thylakoid);GO:0009535(chloroplast thylakoid membrane);GO:0009658(chloroplast organization);GO:0009706(chloroplast inner membrane);GO:0009941(chloroplast envelope);GO:0015979(photosynthesis);GO:0015995(chlorophyll biosynthetic process);GO:0046872(metal ion binding);GO:0048529(magnesium-protoporphyrin…	00860(Porphyrin and chlorophyll metabolism)	K04035	EC:1.14.13.81	PREDICTED: magnesium-protoporphyrin IX monomethyl ester [oxidative] cyclase, chloroplastic-like isoform X1 [Pyrus x bretschneideri]	30.1578	93.7419	3.10838	1.63616	0.0200031	0.175455
MD00G1108700	GO:0003674(molecular_function);GO:0005737(cytoplasm);GO:0005829(cytosol);GO:0008150(biological_process)	NA	NA	NA	PREDICTED: TIP41-like protein [Pyrus x bretschneideri]	2.11057	12.9739	6.14712	2.61991	0.000310359	0.00892702
MD00G1109700	GO:0009507(chloroplast);GO:0009522(photosystem I);GO:0009534(chloroplast thylakoid);GO:0009535(chloroplast thylakoid membrane);GO:0009579(thylakoid);GO:0015979(photosynthesis);GO:0016020(membrane);GO:0016021(integral component of membrane);GO:0016168(chlorophyll binding)	00195(Photosynthesis)	K02698	NA	PREDICTED: photosystem I reaction center subunit psaK, chloroplastic [Malus domestica]	4.85516	31.1443	6.41468	2.68138	0.000196184	0.00625683
MD00G1111500	GO:0003755(peptidyl-prolyl cis-trans isomerase activity);GO:0005528(FK506 binding);GO:0005789(endoplasmic reticulum membrane);GO:0061077(chaperone-mediated protein folding)	NA	NA	NA	PREDICTED: peptidyl-prolyl cis-trans isomerase FKBP17-1, chloroplastic [Prunus mume]	1.36911	4.12365	3.01191	1.59068	0.0309619	0.232744
MD00G1137800	GO:0005737(cytoplasm);GO:0031625(ubiquitin protein ligase binding);GO:0061630(ubiquitin protein ligase activity)	04141(Protein processing in endoplasmic reticulum);04120(Ubiquitin mediated proteolysis)	K10575	EC:2.3.2.23	PREDICTED: ubiquitin-conjugating enzyme E2 7 [Malus domestica]	69.4427	260.03	3.74452	1.90478	0.00678573	0.0853986
MD00G1143300	GO:0000166(nucleotide binding);GO:0005515(protein binding);GO:0005634(nucleus);GO:0006351(transcription, DNA-templated);GO:0006355(regulation of transcription, DNA-templated)	03022(Basal transcription factors)	K03130	NA	PREDICTED: transcription initiation factor TFIID subunit 5 [Malus domestica]	7.68146	25.645	3.33856	1.73923	0.0136304	0.137853
MD00G1143500	GO:0002237(response to molecule of bacterial origin);GO:0003700(transcription factor activity, sequence-specific DNA binding);GO:0005515(protein binding);GO:0005634(nucleus);GO:0006351(transcription, DNA-templated);GO:0006355(regulation of transcription, DNA-templated);GO:0009611(response to wounding);GO:0009751(response to salicylic acid);GO:0010200(response to chitin);GO:0031347(regulation of d…	04626(Plant-pathogen interaction)	K18834	NA	probable WRKY transcription factor 40 [Malus domestica]	4.31693	22.388	5.18611	2.37465	0.000851496	0.0187764
MD00G1147000	GO:0003674(molecular_function);GO:0005634(nucleus);GO:0005886(plasma membrane);GO:0008150(biological_process)	04144(Endocytosis)	K19476	NA	PREDICTED: uncharacterized protein At1g76660-like [Pyrus x bretschneideri]	1.68288	5.24159	3.11465	1.63907	0.0212777	0.183261
MD00G1147200	GO:0004040(amidase activity);GO:0005737(cytoplasm);GO:0005829(cytosol);GO:0009684(indoleacetic acid biosynthetic process);GO:0016810(hydrolase activity, acting on carbon-nitrogen (but not peptide) bonds);GO:0016884(carbon-nitrogen ligase activity, with glutamine as amido-N-donor);GO:0043864(indoleacetamide hydrolase activity)	00970(Aminoacyl-tRNA biosynthesis)	K02433	EC:6.3.5.6;EC:6.3.5.7	PREDICTED: amidase 1-like [Pyrus x bretschneideri]	3.44012	10.6606	3.09889	1.63175	0.0214519	0.184553
MD00G1148200	GO:0005739(mitochondrion);GO:0005743(mitochondrial inner membrane);GO:0009409(response to cold);GO:0009916(alternative oxidase activity);GO:0016021(integral component of membrane);GO:0031930(mitochondria-nucleus signaling pathway);GO:0045333(cellular respiration);GO:0046872(metal ion binding);GO:0055114(oxidation-reduction process);GO:0070469(respiratory chain)	00970(Aminoacyl-tRNA biosynthesis)	K01868	EC:6.1.1.3	PREDICTED: ubiquinol oxidase 2, mitochondrial-like [Pyrus x bretschneideri]	2.40353	126.623	52.6821	5.71924	1.74625e-12	1.53583e-09
MD00G1152400	GO:0005737(cytoplasm);GO:0008146(sulfotransferase activity);GO:0009507(chloroplast);GO:0009694(jasmonic acid metabolic process);GO:0009753(response to jasmonic acid);GO:0080131(hydroxyjasmonate sulfotransferase activity)	01210(2-Oxocarboxylic acid metabolism);00380(Tryptophan metabolism);00966(Glucosinolate biosynthesis)	K11821	EC:2.8.2.-	PREDICTED: cytosolic sulfotransferase 15-like [Malus domestica]	1.54981	15.0196	9.69127	3.27669	9.52205e-06	0.000586902
MD00G1156300	GO:0005516(calmodulin binding);GO:0005634(nucleus);GO:0005886(plasma membrane);GO:0008150(biological_process);GO:0009507(chloroplast)	NA	NA	NA	PREDICTED: BAG family molecular chaperone regulator 8, chloroplastic-like [Pyrus x bretschneideri]	1.75142	4.82632	2.75567	1.4624	0.0403246	0.27084
MD00G1158700	GO:0005515(protein binding)	00500(Starch and sucrose metabolism)	K00695	EC:2.4.1.13	PREDICTED: TMV resistance protein N-like [Pyrus x bretschneideri]	0.331955	1.2048	3.62941	1.85974	0.0106912	0.116569
MD00G1160300	GO:0006869(lipid transport);GO:0042626(ATPase activity, coupled to transmembrane movement of substances);GO:0043231(intracellular membrane-bounded organelle)	02010(ABC transporters)	K05643	NA	PREDICTED: ABC transporter A family member 10-like [Malus domestica]	1.87869	7.36112	3.91821	1.9702	0.00539905	0.0721567
MD00G1160700	GO:0000166(nucleotide binding);GO:0004871(signal transducer activity);GO:0005078(MAP-kinase scaffold activity);GO:0005730(nucleolus);GO:0005829(cytosol);GO:0005834(heterotrimeric G-protein complex);GO:0007165(signal transduction);GO:0009845(seed germination);GO:0009967(positive regulation of signal transduction);GO:0048364(root development);GO:0048367(shoot system development);GO:0071215(cellular…	00640(Propanoate metabolism);00410(beta-Alanine metabolism);04146(Peroxisome)	K01578	EC:4.1.1.9	PREDICTED: LOW QUALITY PROTEIN: guanine nucleotide-binding protein subunit beta-like protein [Malus domestica]	88.7874	232.411	2.61761	1.38825	0.0489277	0.301409
MD00G1171100	GO:0000028(ribosomal small subunit assembly);GO:0003735(structural constituent of ribosome);GO:0022627(cytosolic small ribosomal subunit)	03010(Ribosome)	K02947	NA	PREDICTED: 40S ribosomal protein S10-1-like [Malus domestica]	51.5166	151.862	2.94783	1.55965	0.0266539	0.211337
MD00G1171700	GO:0003674(molecular_function);GO:0005634(nucleus);GO:0008150(biological_process)	NA	NA	NA	PREDICTED: uncharacterized protein LOC103437744 [Malus domestica]	1.84462	5.51158	2.98793	1.57914	0.0330696	0.24183
MD00G1175400	GO:0000103(sulfate assimilation);GO:0005737(cytoplasm);GO:0006457(protein folding);GO:0015035(protein disulfide oxidoreductase activity);GO:0016671(oxidoreductase activity, acting on a sulfur group of donors, disulfide as acceptor);GO:0034599(cellular response to oxidative stress);GO:0045454(cell redox homeostasis);GO:0055114(oxidation-reduction process)	NA	NA	NA	PREDICTED: uncharacterized protein LOC103961335 isoform X1 [Pyrus x bretschneideri]	2.63164	7.16656	2.72323	1.44532	0.0445982	0.286227
MD00G1185600	GO:0005576(extracellular region);GO:0009507(chloroplast);GO:0016021(integral component of membrane)	01210(2-Oxocarboxylic acid metabolism);01230(Biosynthesis of amino acids);00650(Butanoate metabolism);00660(C5-Branched dibasic acid metabolism);00290(Valine, leucine and isoleucine biosynthesis);00770(Pantothenate and CoA biosynthesis)	K01652	EC:2.2.1.6	PREDICTED: C2 domain-containing protein At1g53590-like isoform X1 [Malus domestica]	2.41499	11.4727	4.75063	2.24812	0.00170977	0.0314035
MD00G1191600	GO:0004806(triglyceride lipase activity);GO:0005737(cytoplasm);GO:0006629(lipid metabolic process);GO:0008970(phosphatidylcholine 1-acylhydrolase activity);GO:0009507(chloroplast);GO:0009650(UV protection);GO:0016042(lipid catabolic process);GO:0071493(cellular response to UV-B)	00564(Glycerophospholipid metabolism);00592(alpha-Linolenic acid metabolism)	K16818	EC:3.1.1.32	PREDICTED: phospholipase A1-IIdelta-like [Malus domestica]	1.10247	3.17863	2.88318	1.52766	0.0369122	0.258047
MD00G1193100	GO:0003674(molecular_function);GO:0005737(cytoplasm);GO:0008150(biological_process)	04626(Plant-pathogen interaction)	K13420	EC:2.7.11.1	PREDICTED: protein NETWORKED 4A-like isoform X1 [Malus domestica]	2.33166	8.55402	3.66863	1.87524	0.0102068	0.112971
MD01G1004300	GO:0005516(calmodulin binding);GO:0009507(chloroplast);GO:0009522(photosystem I);GO:0009534(chloroplast thylakoid);GO:0009535(chloroplast thylakoid membrane);GO:0009543(chloroplast thylakoid lumen);GO:0009579(thylakoid);GO:0009773(photosynthetic electron transport in photosystem I);GO:0015979(photosynthesis);GO:0030093(chloroplast photosystem I)	00195(Photosynthesis)	K02701	NA	PREDICTED: photosystem I reaction center subunit N, chloroplastic-like [Malus domestica]	3.41345	11.349	3.32478	1.73326	0.0150348	0.146861
MD01G1020300	GO:0000166(nucleotide binding);GO:0003723(RNA binding);GO:0005515(protein binding);GO:0005634(nucleus);GO:0005737(cytoplasm);GO:0005829(cytosol);GO:0006952(defense response);GO:0008219(cell death);GO:0009693(ethylene biosynthetic process);GO:0009738(abscisic acid-activated signaling pathway);GO:0010150(leaf senescence);GO:0017091(AU-rich element binding);GO:0048255(mRNA stabilization)	03040(Spliceosome)	K12741	NA	PREDICTED: UBP1-associated protein 2A-like [Malus domestica]	42.3209	248.921	5.88175	2.55625	0.000329086	0.00932793
MD01G1024000	GO:0005634(nucleus);GO:0005737(cytoplasm)	NA	NA	NA	PREDICTED: uncharacterized protein LOC103437618 [Malus domestica]	8.57359	26.8387	3.13039	1.64634	0.0192151	0.171036
MD01G1027200	GO:0003677(DNA binding);GO:0003700(transcription factor activity, sequence-specific DNA binding);GO:0005634(nucleus);GO:0006351(transcription, DNA-templated);GO:0006355(regulation of transcription, DNA-templated);GO:0009873(ethylene-activated signaling pathway)	04075(Plant hormone signal transduction)	K14516	NA	AP2 domain class transcription factor [Malus domestica]	4.76125	16.8619	3.54148	1.82435	0.00994203	0.110846
MD01G1028100	GO:0003674(molecular_function);GO:0005768(endosome);GO:0005794(Golgi apparatus);GO:0005802(trans-Golgi network);GO:0008150(biological_process);GO:0016021(integral component of membrane)	NA	NA	NA	PREDICTED: uncharacterized protein LOC103408150 [Malus domestica]	3.82883	34.7122	9.066	3.18047	1.33178e-05	0.000763251
MD01G1028300	GO:0005634(nucleus);GO:0005886(plasma membrane);GO:0008150(biological_process)	NA	NA	NA	PREDICTED: uncharacterized protein LOC103931922 isoform X1 [Pyrus x bretschneideri]	0.505513	3.90043	7.71579	2.94781	6.00434e-05	0.00255682
MD01G1029700	GO:0004066(asparagine synthase (glutamine-hydrolyzing) activity);GO:0004071(aspartate-ammonia ligase activity);GO:0005524(ATP binding);GO:0005737(cytoplasm);GO:0005829(cytosol);GO:0006529(asparagine biosynthetic process);GO:0006541(glutamine metabolic process);GO:0009506(plasmodesma);GO:0042538(hyperosmotic salinity response);GO:0042803(protein homodimerization activity);GO:0070981(L-asparagine b…	00250(Alanine, aspartate and glutamate metabolism)	K01953	EC:6.3.5.4	PREDICTED: asparagine synthetase [glutamine-hydrolyzing] 2 [Malus domestica]	17.5043	122.81	7.016	2.81065	8.88789e-05	0.00339865
MD01G1035100	GO:0003824(catalytic activity);GO:0005737(cytoplasm);GO:0019898(extrinsic component of membrane)	NA	NA	NA	PREDICTED: LOW QUALITY PROTEIN: lanC-like protein GCL1 [Malus domestica]	13.5703	66.3791	4.8915	2.29028	0.0012178	0.0247313
MD01G1035400	GO:0003714(transcription corepressor activity);GO:0005634(nucleus)	NA	NA	NA	PREDICTED: protein SCAI-like [Malus domestica]	5.36888	15.6579	2.91642	1.5442	0.0285231	0.221699
MD01G1036200	GO:0003700(transcription factor activity, sequence-specific DNA binding);GO:0005634(nucleus);GO:0006351(transcription, DNA-templated);GO:0006355(regulation of transcription, DNA-templated);GO:0009737(response to abscisic acid);GO:0009738(abscisic acid-activated signaling pathway);GO:0009787(regulation of abscisic acid-activated signaling pathway);GO:0042803(protein homodimerization activity);GO:0…	00750(Vitamin B6 metabolism)	K05275	EC:1.1.1.65	PREDICTED: homeobox-leucine zipper protein ATHB-6-like isoform X1 [Malus domestica]	92.9318	334.773	3.60235	1.84894	0.00854289	0.100489
MD01G1043100	GO:0005737(cytoplasm);GO:0008270(zinc ion binding);GO:0009735(response to cytokinin);GO:0009809(lignin biosynthetic process);GO:0045551(cinnamyl-alcohol dehydrogenase activity);GO:0048046(apoplast);GO:0052747(sinapyl alcohol dehydrogenase activity);GO:0055114(oxidation-reduction process)	00940(Phenylpropanoid biosynthesis)	K00083	EC:1.1.1.195	PREDICTED: 8-hydroxygeraniol dehydrogenase-like [Malus domestica]	2.52855	9.92299	3.92438	1.97247	0.00549504	0.0731403
MD01G1044100	GO:0004372(glycine hydroxymethyltransferase activity);GO:0005515(protein binding);GO:0005634(nucleus);GO:0005739(mitochondrion);GO:0005759(mitochondrial matrix);GO:0005829(cytosol);GO:0005886(plasma membrane);GO:0006544(glycine metabolic process);GO:0006563(L-serine metabolic process);GO:0007623(circadian rhythm);GO:0008266(poly(U) RNA binding);GO:0009409(response to cold);GO:0009416(response to …	01200(Carbon metabolism);01230(Biosynthesis of amino acids);00630(Glyoxylate and dicarboxylate metabolism);00260(Glycine, serine and threonine metabolism);00460(Cyanoamino acid metabolism);00670(One carbon pool by folate)	K00600	EC:2.1.2.1	PREDICTED: serine hydroxymethyltransferase, mitochondrial [Pyrus x bretschneideri]	14.766	54.2196	3.67192	1.87653	0.00767702	0.0934774
MD01G1046300	GO:0003674(molecular_function);GO:0005575(cellular_component);GO:0008150(biological_process)	01200(Carbon metabolism);00010(Glycolysis / Gluconeogenesis);00020(Citrate cycle (TCA cycle));00620(Pyruvate metabolism);00710(Carbon fixation in photosynthetic organisms)	K01610	EC:4.1.1.49	PREDICTED: uncharacterized protein LOC103417933 isoform X1 [Malus domestica]	0.673784	1.89582	2.8137	1.49247	0.0426585	0.278706
MD01G1049600	GO:0003674(molecular_function);GO:0006952(defense response);GO:0016020(membrane)	NA	NA	NA	PREDICTED: BON1-associated protein 2-like [Malus domestica]	7.20965	69.2588	9.60641	3.264	8.47339e-06	0.000542748
MD01G1049700	GO:0043161(proteasome-mediated ubiquitin-dependent protein catabolic process);GO:0061630(ubiquitin protein ligase activity)	00380(Tryptophan metabolism)	K11816	EC:1.14.13.168	PREDICTED: E3 ubiquitin-protein ligase At4g11680 [Prunus mume]	1.11337	3.45927	3.10702	1.63553	0.0242092	0.200286
MD01G1053100	GO:0047037(salutaridine reductase (NADPH) activity);GO:0050661(NADP binding);GO:0097295(morphine biosynthetic process)	00902(Monoterpenoid biosynthesis)	K15095	EC:1.1.1.208	PREDICTED: (+)-neomenthol dehydrogenase-like [Malus domestica]	3.79186	12.0044	3.16584	1.66259	0.0192352	0.171148
MD01G1067800	GO:0005634(nucleus);GO:0008270(zinc ion binding);GO:0009741(response to brassinosteroid);GO:0010200(response to chitin);GO:0016021(integral component of membrane)	03013(RNA transport)	K03257	NA	PREDICTED: E3 ubiquitin-protein ligase RHA1B-like [Pyrus x bretschneideri]	2.87514	21.4565	7.46277	2.89971	7.57547e-05	0.00302846
MD01G1069300	GO:0004674(protein serine/threonine kinase activity);GO:0005524(ATP binding);GO:0005886(plasma membrane);GO:0006468(protein phosphorylation);GO:0016021(integral component of membrane);GO:0016301(kinase activity);GO:0046777(protein autophosphorylation)	04626(Plant-pathogen interaction)	K13430	EC:2.7.11.1	PREDICTED: probable serine/threonine-protein kinase At1g01540 [Pyrus x bretschneideri]	0.703656	3.84867	5.46953	2.45142	0.000737274	0.0170295
MD01G1069500	GO:0003674(molecular_function);GO:0008150(biological_process)	NA	NA	NA	PREDICTED: uncharacterized protein LOC103408736 isoform X1 [Malus domestica]	3.91016	11.2701	2.88227	1.52721	0.0317047	0.235846
MD01G1070300	GO:0005737(cytoplasm);GO:0030001(metal ion transport);GO:0046914(transition metal ion binding);GO:0046916(cellular transition metal ion homeostasis)	NA	NA	NA	PREDICTED: FK506-binding protein 4-like [Malus domestica]	38.492	125.735	3.26653	1.70776	0.0151442	0.147736
MD01G1072900	GO:0005737(cytoplasm);GO:0005783(endoplasmic reticulum);GO:0005789(endoplasmic reticulum membrane);GO:0006629(lipid metabolic process);GO:0016021(integral component of membrane);GO:0016491(oxidoreductase activity);GO:0030148(sphingolipid biosynthetic process);GO:0046872(metal ion binding);GO:0052631(sphingolipid delta-8 desaturase activity);GO:0055114(oxidation-reduction process);GO:0070417(cellu…	00910(Nitrogen metabolism)	K10534	EC:1.7.1.1;EC:1.7.1.2	PREDICTED: LOW QUALITY PROTEIN: delta(8)-fatty-acid desaturase 1-like [Malus domestica]	0.624265	20.7859	33.2966	5.0573	1.66341e-10	6.55813e-08
MD01G1074300	GO:0004842(ubiquitin-protein transferase activity);GO:0005634(nucleus);GO:0010114(response to red light);GO:0031463(Cul3-RING ubiquitin ligase complex)	NA	NA	NA	PREDICTED: BTB/POZ domain-containing protein POB1-like [Malus domestica]	22.1878	58.529	2.63789	1.39938	0.0472646	0.296434
MD01G1076900	GO:0003674(molecular_function);GO:0005634(nucleus);GO:0005886(plasma membrane);GO:0008150(biological_process)	NA	NA	NA	PREDICTED: uncharacterized protein At5g05190 [Malus domestica]	0.520662	2.36233	4.53717	2.18179	0.00252709	0.0415956
MD01G1077200	GO:0009813(flavonoid biosynthetic process);GO:0043231(intracellular membrane-bounded organelle);GO:0052696(flavonoid glucuronidation);GO:0080043(quercetin 3-O-glucosyltransferase activity);GO:0080044(quercetin 7-O-glucosyltransferase activity)	03013(RNA transport)	K14299	NA	PREDICTED: hydroquinone glucosyltransferase [Malus domestica]	2.31762	10.9129	4.70868	2.23532	0.0017229	0.0315181
MD01G1078000	GO:0009737(response to abscisic acid)	04626(Plant-pathogen interaction)	K16225	NA	probable WRKY transcription factor 46 [Malus domestica]	3.34356	9.21529	2.75613	1.46265	0.0399391	0.269113
MD01G1080500	GO:0005634(nucleus);GO:0005737(cytoplasm);GO:0005829(cytosol)	01200(Carbon metabolism);01210(2-Oxocarboxylic acid metabolism);01230(Biosynthesis of amino acids);00020(Citrate cycle (TCA cycle));00630(Glyoxylate and dicarboxylate metabolism)	K01647	EC:2.3.3.1	PREDICTED: protein TSS [Malus domestica]	1.46739	15.0823	10.2783	3.36153	4.39926e-06	0.000317343
MD01G1082700	GO:0003677(DNA binding);GO:0003700(transcription factor activity, sequence-specific DNA binding);GO:0005634(nucleus);GO:0006351(transcription, DNA-templated);GO:0006355(regulation of transcription, DNA-templated);GO:0044212(transcription regulatory region DNA binding);GO:0046983(protein dimerization activity)	04075(Plant hormone signal transduction)	K13422	NA	PREDICTED: transcription factor bHLH13-like [Malus domestica]	3.68247	10.8316	2.94138	1.55649	0.0276121	0.216235
MD01G1083500	GO:0003700(transcription factor activity, sequence-specific DNA binding);GO:0005634(nucleus);GO:0006355(regulation of transcription, DNA-templated);GO:0009793(embryo development ending in seed dormancy)	NA	NA	NA	PREDICTED: uncharacterized protein At4g00950-like [Malus domestica]	4.46158	37.6048	8.42859	3.07529	2.36569e-05	0.0012239
MD01G1083900	GO:0005634(nucleus);GO:0005886(plasma membrane)	NA	NA	NA	PREDICTED: kinesin light chain-like [Pyrus x bretschneideri]	0.560251	1.75019	3.12394	1.64337	0.0227178	0.191576
MD01G1086200	GO:0003674(molecular_function);GO:0005739(mitochondrion);GO:0008150(biological_process);GO:0009507(chloroplast);GO:0009534(chloroplast thylakoid);GO:0009706(chloroplast inner membrane);GO:0009941(chloroplast envelope);GO:0016021(integral component of membrane)	NA	NA	NA	PREDICTED: uncharacterized protein LOC103417540 [Malus domestica]	4.62613	26.9312	5.82153	2.5414	0.00038553	0.0104454
MD01G1087900	GO:0003674(molecular_function);GO:0005634(nucleus)	03015(mRNA surveillance pathway)	K14411	NA	PREDICTED: protein IQ-DOMAIN 1-like isoform X2 [Malus domestica]	11.8634	31.4181	2.64833	1.40508	0.0464333	0.293789
MD01G1088900	GO:0000156(phosphorelay response regulator activity);GO:0000160(phosphorelay signal transduction system);GO:0003677(DNA binding);GO:0005515(protein binding);GO:0005634(nucleus);GO:0006351(transcription, DNA-templated);GO:0006355(regulation of transcription, DNA-templated);GO:0007623(circadian rhythm);GO:0009266(response to temperature stimulus);GO:0010017(red or far-red light signaling pathway);G…	04712(Circadian rhythm - plant)	K12130	NA	PREDICTED: LOW QUALITY PROTEIN: two-component response regulator-like PRR95 [Malus domestica]	1.95816	9.45331	4.82764	2.27132	0.00140996	0.0274865
MD01G1089400	GO:0003677(DNA binding);GO:0009295(nucleoid);GO:0009507(chloroplast);GO:0009508(plastid chromosome);GO:0009534(chloroplast thylakoid);GO:0009535(chloroplast thylakoid membrane);GO:0009579(thylakoid);GO:0009737(response to abscisic acid);GO:0009773(photosynthetic electron transport in photosystem I);GO:0009941(chloroplast envelope);GO:0016021(integral component of membrane);GO:0030093(chloroplast …	NA	NA	NA	PREDICTED: protein CURVATURE THYLAKOID 1B, chloroplastic [Prunus mume]	4.56928	25.1921	5.51336	2.46293	0.000569742	0.0139639
MD01G1090900	GO:0003677(DNA binding);GO:0003700(transcription factor activity, sequence-specific DNA binding);GO:0005634(nucleus);GO:0006351(transcription, DNA-templated);GO:0006355(regulation of transcription, DNA-templated);GO:0007623(circadian rhythm);GO:0009409(response to cold);GO:0009651(response to salt stress);GO:0009723(response to ethylene);GO:0009733(response to auxin);GO:0009737(response to abscis…	04712(Circadian rhythm - plant)	K12133	NA	PREDICTED: protein LHY-like [Malus domestica]	1.77162	17.5674	9.916	3.30976	6.18727e-06	0.000411292
MD01G1095200	GO:0004519(endonuclease activity);GO:0004527(exonuclease activity);GO:0005509(calcium ion binding)	NA	NA	NA	PREDICTED: uncharacterized calcium-binding protein At1g02270-like [Pyrus x bretschneideri]	1.06099	3.70065	3.4879	1.80236	0.0122617	0.128148
MD01G1103500	GO:0005634(nucleus);GO:0005737(cytoplasm)	04140(Regulation of autophagy)	K08332	NA	PREDICTED: U-box domain-containing protein 14 [Malus domestica]	15.7048	49.2525	3.13614	1.64899	0.0190829	0.170038
MD01G1108000	GO:0000977(RNA polymerase II regulatory region sequence-specific DNA binding);GO:0001085(RNA polymerase II transcription factor binding);GO:0001228(transcriptional activator activity, RNA polymerase II transcription regulatory region sequence-specific binding);GO:0003682(chromatin binding);GO:0005634(nucleus);GO:0005667(transcription factor complex);GO:0030154(cell differentiation)	NA	NA	NA	PREDICTED: GATA transcription factor 8-like [Malus domestica]	2.06637	33.5534	16.2379	4.02129	9.34239e-08	1.39629e-05
MD01G1108100	GO:0003677(DNA binding);GO:0003700(transcription factor activity, sequence-specific DNA binding);GO:0005634(nucleus);GO:0006351(transcription, DNA-templated);GO:0006355(regulation of transcription, DNA-templated);GO:0007389(pattern specification process);GO:0009733(response to auxin);GO:0009734(auxin-activated signaling pathway);GO:0035198(miRNA binding);GO:0048829(root cap development);GO:005130…	04075(Plant hormone signal transduction)	K14486	NA	PREDICTED: auxin response factor 18-like isoform X1 [Pyrus x bretschneideri]	6.3748	23.8429	3.74018	1.90311	0.00692469	0.0866705
MD01G1108500	GO:0005773(vacuole);GO:0005887(integral component of plasma membrane);GO:0009506(plasmodesma);GO:0009992(cellular water homeostasis);GO:0015250(water channel activity);GO:0015254(glycerol channel activity);GO:0034220(ion transmembrane transport)	00531(Glycosaminoglycan degradation)	K10532	EC:2.3.1.78	aquaporin, partial [Malus zumi]	2.38009	6.77937	2.84836	1.51013	0.0340604	0.246532
MD01G1109300	GO:0046654(tetrahydrofolate biosynthetic process);GO:0046820(4-amino-4-deoxychorismate synthase activity)	00790(Folate biosynthesis)	K13950	EC:2.6.1.85	PREDICTED: aminodeoxychorismate synthase, chloroplastic [Malus domestica]	4.65965	19.6221	4.21108	2.07419	0.00331059	0.0504016
MD01G1111100	GO:0005634(nucleus);GO:0008150(biological_process);GO:0019905(syntaxin binding)	03013(RNA transport)	K03231	NA	PREDICTED: alpha-taxilin-like isoform X2 [Malus domestica]	5.67409	20.4575	3.60543	1.85017	0.00882383	0.10258
MD01G1112200	GO:0003674(molecular_function);GO:0005634(nucleus);GO:0008150(biological_process)	00270(Cysteine and methionine metabolism)	K17398	EC:2.1.1.37	PREDICTED: uncharacterized protein LOC103432529 [Malus domestica]	4.4416	15.0941	3.39835	1.76483	0.0121629	0.127413
MD01G1112500	GO:0008152(metabolic process);GO:0008483(transaminase activity);GO:0009507(chloroplast)	NA	NA	NA	PREDICTED: uncharacterized protein LOC103432563 [Malus domestica]	6.14883	39.7218	6.46006	2.69155	0.000168598	0.00561185
MD01G1114400	GO:0000156(phosphorelay response regulator activity);GO:0000160(phosphorelay signal transduction system);GO:0003677(DNA binding);GO:0005634(nucleus);GO:0005739(mitochondrion);GO:0006351(transcription, DNA-templated);GO:0006355(regulation of transcription, DNA-templated);GO:0007623(circadian rhythm);GO:0009266(response to temperature stimulus);GO:0010017(red or far-red light signaling pathway);GO:…	04712(Circadian rhythm - plant)	K12129	NA	PREDICTED: LOW QUALITY PROTEIN: two-component response regulator-like APRR3 [Malus domestica]	0.672679	8.94366	13.2956	3.73287	6.41892e-07	6.92366e-05
MD01G1117400	GO:0005886(plasma membrane);GO:0016021(integral component of membrane);GO:0042626(ATPase activity, coupled to transmembrane movement of substances)	02010(ABC transporters)	K05681	NA	PREDICTED: ABC transporter G family member 6-like [Malus domestica]	0.46145	2.06836	4.48231	2.16424	0.00300586	0.0472731
MD01G1117800	GO:0005515(protein binding);GO:0005634(nucleus);GO:0005783(endoplasmic reticulum);GO:0009411(response to UV);GO:0009507(chloroplast);GO:0009705(plant-type vacuole membrane);GO:0009733(response to auxin);GO:0009813(flavonoid biosynthetic process);GO:0010224(response to UV-B);GO:0042406(extrinsic component of endoplasmic reticulum membrane);GO:0045430(chalcone isomerase activity);GO:0080167(respons…	00941(Flavonoid biosynthesis)	K01859	EC:5.5.1.6	PREDICTED: uncharacterized protein LOC103433655 isoform X1 [Malus domestica]	1.49369	4.66067	3.12024	1.64166	0.0219023	0.187241
MD01G1118100	GO:0005515(protein binding);GO:0005634(nucleus);GO:0005783(endoplasmic reticulum);GO:0009411(response to UV);GO:0009507(chloroplast);GO:0009705(plant-type vacuole membrane);GO:0009733(response to auxin);GO:0009813(flavonoid biosynthetic process);GO:0010224(response to UV-B);GO:0042406(extrinsic component of endoplasmic reticulum membrane);GO:0045430(chalcone isomerase activity);GO:0080167(respons…	00941(Flavonoid biosynthesis)	K01859	EC:5.5.1.6	PREDICTED: chalcone--flavonone isomerase-like isoform X3 [Malus domestica]	8.36839	26.731	3.19429	1.67549	0.0174793	0.160136
MD01G1119800	GO:0000398(mRNA splicing, via spliceosome);GO:0003723(RNA binding);GO:0005634(nucleus)	03040(Spliceosome)	K12830	NA	PREDICTED: splicing factor 3B subunit 3-like [Pyrus x bretschneideri]	5.4365	14.4744	2.66245	1.41276	0.0453114	0.289311
MD01G1120600	GO:0005385(zinc ion transmembrane transporter activity);GO:0010043(response to zinc ion);GO:0010486(manganese:proton antiporter activity);GO:0016020(membrane);GO:0061088(regulation of sequestering of zinc ion)	02010(ABC transporters)	K05658	EC:3.6.3.44	PREDICTED: metal tolerance protein 11 isoform X1 [Malus domestica]	1.6765	7.87095	4.69487	2.23109	0.00191632	0.0338905
MD01G1125800	GO:0005737(cytoplasm);GO:0031625(ubiquitin protein ligase binding);GO:0061630(ubiquitin protein ligase activity)	04141(Protein processing in endoplasmic reticulum);04120(Ubiquitin mediated proteolysis)	K10575	EC:2.3.2.23	PREDICTED: ubiquitin-conjugating enzyme E2 7-like, partial [Malus domestica]	3.2718	26.3227	8.04534	3.00815	3.30368e-05	0.00162463
MD01G1132500	GO:0004057(arginyltransferase activity);GO:0005737(cytoplasm);GO:0016598(protein arginylation)	NA	NA	NA	PREDICTED: arginyl-tRNA--protein transferase 2-like isoform X2 [Malus domestica]	4.3605	13.2016	3.02755	1.59815	0.0234671	0.196349
MD01G1132800	GO:0009416(response to light stimulus);GO:0009535(chloroplast thylakoid membrane);GO:0009768(photosynthesis, light harvesting in photosystem I);GO:0009941(chloroplast envelope);GO:0010287(plastoglobule);GO:0016168(chlorophyll binding);GO:0031409(pigment binding)	00196(Photosynthesis - antenna proteins)	K08915	NA	PREDICTED: chlorophyll a-b binding protein CP29.3, chloroplastic-like [Malus domestica]	1.73473	15.37	8.86012	3.14733	1.75542e-05	0.000964935
MD01G1137900	GO:0005524(ATP binding);GO:0005618(cell wall);GO:0005634(nucleus);GO:0009409(response to cold);GO:0009416(response to light stimulus);GO:0009507(chloroplast);GO:0009535(chloroplast thylakoid membrane);GO:0009570(chloroplast stroma);GO:0009579(thylakoid);GO:0009753(response to jasmonic acid);GO:0009941(chloroplast envelope);GO:0010150(leaf senescence);GO:0010287(plastoglobule);GO:0010319(stromule)…	NA	NA	NA	PREDICTED: LOW QUALITY PROTEIN: ribulose bisphosphate carboxylase/oxygenase activase, chloroplastic [Pyrus x bretschneideri]	4.98924	33.3332	6.68103	2.74007	0.000135341	0.0047613
MD01G1138500	GO:0003677(DNA binding);GO:0005634(nucleus);GO:0006351(transcription, DNA-templated);GO:0006355(regulation of transcription, DNA-templated);GO:0042742(defense response to bacterium);GO:0045087(innate immune response);GO:0045824(negative regulation of innate immune response);GO:1900425(negative regulation of defense response to bacterium)	NA	NA	NA	PREDICTED: AT-hook motif nuclear-localized protein 15 [Malus domestica]	3.261	9.04411	2.77342	1.47166	0.0397056	0.268465
MD01G1139800	GO:0004674(protein serine/threonine kinase activity);GO:0005886(plasma membrane);GO:0007166(cell surface receptor signaling pathway)	04075(Plant hormone signal transduction)	K13415	EC:2.7.10.1;EC:2.7.11.1	PREDICTED: wall-associated receptor kinase-like 20 [Pyrus x bretschneideri]	1.95085	9.15945	4.6951	2.23116	0.00171552	0.031452
MD01G1139900	GO:0004475(mannose-1-phosphate guanylyltransferase activity);GO:0005515(protein binding);GO:0005525(GTP binding);GO:0005634(nucleus);GO:0005737(cytoplasm);GO:0005829(cytosol);GO:0009058(biosynthetic process);GO:0009298(GDP-mannose biosynthetic process);GO:0009408(response to heat);GO:0009651(response to salt stress);GO:0009753(response to jasmonic acid);GO:0010193(response to ozone);GO:0016779(nu…	00051(Fructose and mannose metabolism);00520(Amino sugar and nucleotide sugar metabolism)	K00966	EC:2.7.7.13	PREDICTED: mannose-1-phosphate guanylyltransferase 1-like [Pyrus x bretschneideri]	31.0083	81.7718	2.6371	1.39895	0.0473233	0.296721
MD01G1141000	GO:0005634(nucleus);GO:0016567(protein ubiquitination)	NA	NA	NA	PREDICTED: BTB/POZ domain-containing protein At1g01640-like [Malus domestica]	1.04028	5.59111	5.37463	2.42617	0.000829708	0.0183926
MD01G1141200	GO:0000164(protein phosphatase type 1 complex);GO:0004722(protein serine/threonine phosphatase activity);GO:0005515(protein binding);GO:0005634(nucleus);GO:0005737(cytoplasm);GO:0006468(protein phosphorylation);GO:0006470(protein dephosphorylation);GO:0010161(red light signaling pathway);GO:0046872(metal ion binding)	NA	NA	NA	hypothetical protein Ccrd_012034 [Cynara cardunculus var. scolymus]	3.27563	16.9294	5.16828	2.36969	0.000924812	0.0200456
MD01G1144200	GO:0009408(response to heat)	04141(Protein processing in endoplasmic reticulum)	K13993	NA	PREDICTED: 18.1 kDa class I heat shock protein-like [Malus domestica]	1.90545	25.436	13.3491	3.73867	6.40734e-07	6.92366e-05
MD01G1144400	GO:0005515(protein binding);GO:0005737(cytoplasm);GO:0009408(response to heat);GO:0009644(response to high light intensity);GO:0010286(heat acclimation);GO:0042542(response to hydrogen peroxide)	04141(Protein processing in endoplasmic reticulum)	K13993	NA	PREDICTED: 16.9 kDa class I heat shock protein 2-like [Pyrus x bretschneideri]	5.65343	48.6029	8.59706	3.10384	1.97777e-05	0.00106413
MD01G1146300	GO:0005975(carbohydrate metabolic process);GO:0005986(sucrose biosynthetic process);GO:0009507(chloroplast);GO:0009570(chloroplast stroma);GO:0009579(thylakoid);GO:0009941(chloroplast envelope);GO:0016051(carbohydrate biosynthetic process);GO:0019252(starch biosynthetic process);GO:0019253(reductive pentose-phosphate cycle);GO:0042132(fructose 1,6-bisphosphate 1-phosphatase activity);GO:0042578(p…	01200(Carbon metabolism);00710(Carbon fixation in photosynthetic organisms)	K01100	EC:3.1.3.37	PREDICTED: sedoheptulose-1,7-bisphosphatase, chloroplastic-like [Malus domestica]	9.53097	34.7341	3.64434	1.86566	0.00811947	0.0973613
MD01G1148500	GO:0000139(Golgi membrane);GO:0005739(mitochondrion);GO:0005768(endosome);GO:0005794(Golgi apparatus);GO:0005802(trans-Golgi network);GO:0006024(glycosaminoglycan biosynthetic process);GO:0006486(protein glycosylation);GO:0007275(multicellular organism development);GO:0009737(response to abscisic acid);GO:0009738(abscisic acid-activated signaling pathway);GO:0010087(phloem or xylem histogenesis);…	NA	NA	NA	PREDICTED: glycosyltransferase family 64 protein C4-like [Malus domestica]	4.23035	15.7434	3.72153	1.8959	0.0073603	0.0906343
MD01G1148800	GO:0005515(protein binding);GO:0005737(cytoplasm);GO:0005739(mitochondrion);GO:0006979(response to oxidative stress);GO:0009751(response to salicylic acid);GO:0009816(defense response to bacterium, incompatible interaction)	NA	NA	NA	PREDICTED: nematode resistance protein-like HSPRO2 [Malus domestica]	5.4904	16.3992	2.98688	1.57864	0.0257143	0.20763
MD01G1149500	NA	NA	NA	NA	-	1.99819	7.41191	3.70932	1.89115	0.00948965	0.107781
MD01G1149900	GO:0005737(cytoplasm)	NA	NA	NA	PREDICTED: pleckstrin homology domain-containing protein 1 [Malus domestica]	38.3607	140.148	3.65342	1.86925	0.00800064	0.0963405
MD01G1153600	GO:0051213(dioxygenase activity)	00941(Flavonoid biosynthesis)	K05278	EC:1.14.11.23	PREDICTED: flavonol synthase/flavanone 3-hydroxylase-like [Malus domestica]	4.53747	41.8971	9.23358	3.20689	1.08926e-05	0.000648651
MD01G1155000	GO:0003677(DNA binding);GO:0003700(transcription factor activity, sequence-specific DNA binding);GO:0005634(nucleus);GO:0006351(transcription, DNA-templated);GO:0006355(regulation of transcription, DNA-templated);GO:0046983(protein dimerization activity)	NA	NA	NA	PREDICTED: transcription factor bHLH51-like [Malus domestica]	2.83433	8.49597	2.99752	1.58377	0.0262635	0.209622
MD01G1156200	GO:0003977(UDP-N-acetylglucosamine diphosphorylase activity);GO:0005829(cytosol);GO:0006048(UDP-N-acetylglucosamine biosynthetic process);GO:0070569(uridylyltransferase activity)	NA	NA	NA	PREDICTED: LOW QUALITY PROTEIN: UTP--glucose-1-phosphate uridylyltransferase 3, chloroplastic-like [Pyrus x bretschneideri]	2.77292	7.57516	2.73184	1.44987	0.0408232	0.272349
MD01G1160300	GO:0003674(molecular_function);GO:0005634(nucleus);GO:0008150(biological_process)	NA	NA	NA	PREDICTED: protein EARLY RESPONSIVE TO DEHYDRATION 15-like [Malus domestica]	4.43313	56.9933	12.8562	3.68439	7.40822e-07	7.84277e-05
MD01G1160900	GO:0003674(molecular_function);GO:0005575(cellular_component);GO:0007568(aging);GO:0009620(response to fungus)	NA	NA	NA	PREDICTED: wound-induced protein 1-like, partial [Malus domestica]	6.0093	23.9317	3.98245	1.99366	0.00518448	0.0699529
MD01G1164700	GO:0004784(superoxide dismutase activity);GO:0005759(mitochondrial matrix);GO:0019430(removal of superoxide radicals)	04146(Peroxisome)	K04564	EC:1.15.1.1	PREDICTED: superoxide dismutase [Mn], mitochondrial-like [Malus domestica]	28.694	389.13	13.5614	3.76143	3.96616e-07	4.62726e-05
MD01G1167000	GO:0003700(transcription factor activity, sequence-specific DNA binding);GO:0005634(nucleus)	04141(Protein processing in endoplasmic reticulum)	K04374	NA	PREDICTED: transcription factor RF2b-like [Malus domestica]	1.75525	4.98172	2.83819	1.50497	0.0369578	0.258207
MD01G1168200	GO:0004842(ubiquitin-protein transferase activity);GO:0019005(SCF ubiquitin ligase complex);GO:0031146(SCF-dependent proteasomal ubiquitin-dependent protein catabolic process)	04145(Phagosome)	K07374	NA	PREDICTED: putative F-box protein At3g16210 [Malus domestica]	404.099	1424.56	3.52526	1.81773	0.00970344	0.109283
MD01G1179700	NA	04120(Ubiquitin mediated proteolysis)	K04506	EC:2.3.2.27	M18-S3Bp [Malus floribunda]	1.99777	46.2176	23.1346	4.53198	5.2154e-09	1.21694e-06
MD01G1179800	GO:0004672(protein kinase activity);GO:0004674(protein serine/threonine kinase activity);GO:0005515(protein binding);GO:0005524(ATP binding);GO:0005886(plasma membrane);GO:0006468(protein phosphorylation);GO:0007169(transmembrane receptor protein tyrosine kinase signaling pathway);GO:0016021(integral component of membrane);GO:0016301(kinase activity)	04626(Plant-pathogen interaction)	K13466	NA	M18S-3Ap [Malus floribunda]	4.26034	238.137	55.8964	5.80468	7.83269e-13	7.7874e-10
MD01G1184600	GO:0003674(molecular_function);GO:0005576(extracellular region);GO:0005615(extracellular space);GO:0009505(plant-type cell wall);GO:0009506(plasmodesma);GO:0048046(apoplast);GO:0080167(response to karrikin)	NA	NA	NA	PREDICTED: protein EXORDIUM-like 3 [Malus domestica]	1.15645	4.25446	3.67889	1.87927	0.00923914	0.105847
MD01G1185500	GO:0000015(phosphopyruvate hydratase complex);GO:0000287(magnesium ion binding);GO:0003677(DNA binding);GO:0004634(phosphopyruvate hydratase activity);GO:0005507(copper ion binding);GO:0005634(nucleus);GO:0005737(cytoplasm);GO:0005739(mitochondrion);GO:0005740(mitochondrial envelope);GO:0005829(cytosol);GO:0005886(plasma membrane);GO:0006096(glycolytic process);GO:0006351(transcription, DNA-templ…	01200(Carbon metabolism);01230(Biosynthesis of amino acids);00010(Glycolysis / Gluconeogenesis);03018(RNA degradation)	K01689	EC:4.2.1.11	PREDICTED: enolase [Malus domestica]	10.4497	187.41	17.9345	4.16467	3.36356e-08	6.05626e-06
MD01G1186200	GO:0005739(mitochondrion);GO:0008150(biological_process)	00562(Inositol phosphate metabolism);04070(Phosphatidylinositol signaling system)	K18081	EC:3.1.3.64;EC:3.1.3.95	PREDICTED: uncharacterized protein LOC103406497 [Malus domestica]	1.50793	7.1409	4.73558	2.24354	0.00175282	0.0318868
MD01G1195700	GO:0004683(calmodulin-dependent protein kinase activity);GO:0005516(calmodulin binding);GO:0005634(nucleus);GO:0005737(cytoplasm);GO:0005886(plasma membrane);GO:0009738(abscisic acid-activated signaling pathway);GO:0009931(calcium-dependent protein serine/threonine kinase activity);GO:0018105(peptidyl-serine phosphorylation);GO:0035556(intracellular signal transduction);GO:0046777(protein autopho…	04626(Plant-pathogen interaction)	K13412	EC:2.7.11.1	PREDICTED: calcium-dependent protein kinase 26-like [Malus domestica]	3.64242	14.0344	3.85304	1.946	0.00588757	0.076932
MD01G1195800	GO:0003674(molecular_function);GO:0008150(biological_process);GO:0009507(chloroplast)	03040(Spliceosome)	K12893	NA	PREDICTED: uncharacterized protein LOC103440166 [Malus domestica]	2.09001	8.08989	3.87074	1.95261	0.00624521	0.0805921
MD01G1196800	GO:0006855(drug transmembrane transport);GO:0015238(drug transmembrane transporter activity)	NA	NA	NA	PREDICTED: protein DETOXIFICATION 49-like isoform X1 [Malus domestica]	1.16741	9.88676	8.46899	3.08219	2.6888e-05	0.0013755
MD01G1196900	GO:0005739(mitochondrion);GO:0051087(chaperone binding)	NA	NA	NA	PREDICTED: BAG family molecular chaperone regulator 1 [Malus domestica]	10.013	44.7342	4.46762	2.15951	0.00224937	0.0383091
MD01G1198300	GO:0004842(ubiquitin-protein transferase activity);GO:0005737(cytoplasm);GO:0008270(zinc ion binding);GO:0016567(protein ubiquitination);GO:0016874(ligase activity)	NA	NA	NA	PREDICTED: E3 ubiquitin-protein ligase XBAT33-like isoform X1 [Malus domestica]	8.8318	23.272	2.63503	1.39782	0.0478817	0.298531
MD01G1199000	GO:0004360(glutamine-fructose-6-phosphate transaminase (isomerizing) activity);GO:0006002(fructose 6-phosphate metabolic process);GO:0006047(UDP-N-acetylglucosamine metabolic process)	NA	NA	NA	PREDICTED: 3-hexulose-6-phosphate isomerase-like [Malus domestica]	6.18491	32.793	5.30209	2.40656	0.000787095	0.017727
MD01G1201400	GO:0006664(glycolipid metabolic process);GO:0012505(endomembrane system);GO:0046527(glucosyltransferase activity)	00514(Other types of O-glycan biosynthesis)	K13667	EC:2.4.1.-	PREDICTED: O-glucosyltransferase rumi homolog [Malus domestica]	0.796004	4.23526	5.32065	2.4116	0.000871919	0.0191898
MD01G1205900	GO:0003674(molecular_function);GO:0005575(cellular_component);GO:0008150(biological_process)	04144(Endocytosis)	K05747	NA	PREDICTED: protein SRC2 homolog [Malus domestica]	8.46408	27.963	3.30372	1.72409	0.0147048	0.144875
MD01G1206300	GO:0006855(drug transmembrane transport);GO:0015238(drug transmembrane transporter activity)	NA	NA	NA	PREDICTED: protein DETOXIFICATION 35-like isoform X3 [Pyrus x bretschneideri]	13.1464	92.3066	7.02141	2.81176	8.8644e-05	0.00339535
MD01G1207700	GO:0004674(protein serine/threonine kinase activity);GO:0005524(ATP binding);GO:0005886(plasma membrane);GO:0006468(protein phosphorylation);GO:0009506(plasmodesma);GO:0016021(integral component of membrane);GO:0016301(kinase activity)	04626(Plant-pathogen interaction)	K13430	EC:2.7.11.1	PREDICTED: probable receptor-like protein kinase At5g24010 [Malus domestica]	0.506429	2.2428	4.42866	2.14687	0.00317313	0.0489572
MD01G1211300	GO:0005634(nucleus);GO:0008568(microtubule-severing ATPase activity);GO:0031122(cytoplasmic microtubule organization)	03013(RNA transport)	K03231	NA	PREDICTED: nuclear valosin-containing protein-like [Pyrus x bretschneideri]	1.51411	10.4506	6.90218	2.78705	0.000111224	0.00410882
MD01G1213600	GO:0005524(ATP binding);GO:0005774(vacuolar membrane);GO:0005886(plasma membrane);GO:0008559(xenobiotic-transporting ATPase activity);GO:0016021(integral component of membrane);GO:0042626(ATPase activity, coupled to transmembrane movement of substances)	02010(ABC transporters)	K05666	NA	PREDICTED: ABC transporter C family member 10 [Malus domestica]	17.0737	63.789	3.7361	1.90153	0.00687091	0.0861387
MD01G1215300	GO:0003677(DNA binding);GO:0003700(transcription factor activity, sequence-specific DNA binding);GO:0005515(protein binding);GO:0005634(nucleus);GO:0006351(transcription, DNA-templated);GO:0006355(regulation of transcription, DNA-templated);GO:0009507(chloroplast);GO:0009751(response to salicylic acid);GO:0009816(defense response to bacterium, incompatible interaction);GO:0010150(leaf senescence)…	04626(Plant-pathogen interaction)	K16225	NA	PREDICTED: probable WRKY transcription factor 53 [Malus domestica]	1.35555	7.20793	5.31736	2.41071	0.000902506	0.0196736
MD01G1219500	GO:0005737(cytoplasm);GO:0006537(glutamate biosynthetic process);GO:0015930(glutamate synthase activity);GO:0019676(ammonia assimilation cycle)	01230(Biosynthesis of amino acids);00910(Nitrogen metabolism);00250(Alanine, aspartate and glutamate metabolism)	K00264	EC:1.4.1.13;EC:1.4.1.14	PREDICTED: glutamate synthase [NADH], amyloplastic isoform X1 [Malus domestica]	65.8329	237.339	3.60517	1.85007	0.00849424	0.100135
MD01G1222200	NA	NA	NA	NA	PREDICTED: uncharacterized protein LOC103408827 [Malus domestica]	1.43722	19.7807	13.7632	3.78275	4.62554e-07	5.34203e-05
MD01G1222600	GO:0016787(hydrolase activity)	NA	NA	NA	PREDICTED: putative aminoacrylate hydrolase RutD [Malus domestica]	1.20261	3.53701	2.94111	1.55636	0.0301947	0.22863
MD01G1224800	GO:0003674(molecular_function);GO:0005634(nucleus);GO:0008150(biological_process);GO:0046872(metal ion binding)	NA	NA	NA	PREDICTED: protein yippee-like At4g27740 [Malus domestica]	147.81	538.054	3.64016	1.864	0.00803234	0.0965189
MD01G1228200	GO:0000156(phosphorelay response regulator activity);GO:0000160(phosphorelay signal transduction system);GO:0003677(DNA binding);GO:0005515(protein binding);GO:0005634(nucleus);GO:0006351(transcription, DNA-templated);GO:0006355(regulation of transcription, DNA-templated);GO:0007623(circadian rhythm);GO:0009266(response to temperature stimulus);GO:0010017(red or far-red light signaling pathway);G…	04712(Circadian rhythm - plant)	K12130	NA	PREDICTED: two-component response regulator-like APRR5 isoform X1 [Pyrus x bretschneideri]	13.2096	58.0847	4.39715	2.13657	0.002472	0.0409321
MD01G1232800	GO:0005575(cellular_component);GO:0008150(biological_process);GO:0016746(transferase activity, transferring acyl groups)	NA	NA	NA	PREDICTED: lecithin retinol acyltransferase-like [Malus domestica]	3.73551	20.7051	5.54277	2.47061	0.000586345	0.0142871
MD01G1238400	GO:0003674(molecular_function);GO:0005634(nucleus);GO:0008150(biological_process)	NA	NA	NA	PREDICTED: uncharacterized protein LOC103406617 [Malus domestica]	10.5862	45.3524	4.28412	2.099	0.00303032	0.0475596
MD02G1003500	GO:0003712(transcription cofactor activity);GO:0004402(histone acetyltransferase activity);GO:0005516(calmodulin binding);GO:0005634(nucleus);GO:0006355(regulation of transcription, DNA-templated);GO:0008270(zinc ion binding);GO:0009409(response to cold);GO:0009553(embryo sac development);GO:0009555(pollen development);GO:0009651(response to salt stress);GO:0009723(response to ethylene);GO:000975…	00903(Limonene and pinene degradation);00945(Stilbenoid, diarylheptanoid and gingerol biosynthesis)	K00517	NA	PREDICTED: BTB/POZ and TAZ domain-containing protein 3-like [Malus domestica]	2.63038	10.0231	3.81052	1.92999	0.00656003	0.0833842
MD02G1009900	GO:0003723(RNA binding);GO:0005515(protein binding);GO:0005634(nucleus);GO:0006397(mRNA processing);GO:0042802(identical protein binding)	03015(mRNA surveillance pathway)	K14405	NA	PREDICTED: FIP1[V]-like protein isoform X2 [Malus domestica]	11.0392	32.5397	2.94766	1.55957	0.0266401	0.211337
MD02G1012500	GO:0004017(adenylate kinase activity);GO:0005524(ATP binding);GO:0009507(chloroplast);GO:0009534(chloroplast thylakoid);GO:0009535(chloroplast thylakoid membrane);GO:0009941(chloroplast envelope);GO:0019201(nucleotide kinase activity)	00230(Purine metabolism)	K00939	EC:2.7.4.3	PREDICTED: adenylate kinase 5, chloroplastic isoform X2 [Malus domestica]	1.06364	4.5541	4.28162	2.09816	0.00342719	0.0518316
MD02G1013200	GO:0000209(protein polyubiquitination);GO:0042787(protein ubiquitination involved in ubiquitin-dependent protein catabolic process);GO:0043161(proteasome-mediated ubiquitin-dependent protein catabolic process);GO:0061630(ubiquitin protein ligase activity)	03013(RNA transport)	K14317	NA	PREDICTED: E3 ubiquitin-protein ligase EL5 isoform X1 [Malus domestica]	7.37285	56.8015	7.70415	2.94564	4.41749e-05	0.00204483
MD02G1013600	GO:0003924(GTPase activity);GO:0005622(intracellular);GO:0006412(translation)	03040(Spliceosome)	K12852	NA	PREDICTED: LOW QUALITY PROTEIN: 116 kDa U5 small nuclear ribonucleoprotein component-like [Malus domestica]	7.5235	25.5961	3.40215	1.76645	0.0120866	0.1271
MD02G1016700	GO:0003674(molecular_function);GO:0005576(extracellular region);GO:0008150(biological_process);GO:0009506(plasmodesma);GO:0016021(integral component of membrane)	NA	NA	NA	PREDICTED: uncharacterized protein LOC103447424 [Malus domestica]	4.47341	21.4233	4.78903	2.25973	0.00145502	0.0280775
MD02G1019700	GO:0051213(dioxygenase activity)	00941(Flavonoid biosynthesis)	K05278	EC:1.14.11.23	PREDICTED: protein SRG1-like [Malus domestica]	1.56289	4.21003	2.69375	1.42962	0.047835	0.298375
MD02G1019900	GO:0000326(protein storage vacuole);GO:0005515(protein binding);GO:0005783(endoplasmic reticulum);GO:0005789(endoplasmic reticulum membrane);GO:0005886(plasma membrane);GO:0006623(protein targeting to vacuole);GO:0016021(integral component of membrane);GO:0032586(protein storage vacuole membrane)	NA	NA	NA	PREDICTED: protein SRC2-like [Malus domestica]	1.95799	52.7075	26.9191	4.75056	1.14425e-09	3.44283e-07
MD02G1020000	GO:0051213(dioxygenase activity)	00941(Flavonoid biosynthesis)	K05278	EC:1.14.11.23	PREDICTED: protein SRG1-like [Malus domestica]	15.6713	64.171	4.09481	2.0338	0.00392092	0.0570354
MD02G1020100	GO:0051213(dioxygenase activity)	00941(Flavonoid biosynthesis)	K05278	EC:1.14.11.23	PREDICTED: protein SRG1-like [Malus domestica]	7.97016	54.7412	6.86826	2.77995	0.000106521	0.00397359
MD02G1021100	NA	NA	NA	NA	PREDICTED: uncharacterized protein LOC108169401 [Malus domestica]	17.8781	49.7843	2.78465	1.47749	0.0361975	0.255314
MD02G1022000	GO:0004674(protein serine/threonine kinase activity);GO:0005524(ATP binding);GO:0005737(cytoplasm);GO:0005886(plasma membrane);GO:0006468(protein phosphorylation);GO:0016301(kinase activity);GO:0016310(phosphorylation)	04075(Plant hormone signal transduction)	K13415	EC:2.7.10.1;EC:2.7.11.1	PREDICTED: uncharacterized protein LOC103953968 isoform X1 [Pyrus x bretschneideri]	0.914692	3.59017	3.92501	1.9727	0.00657125	0.0834796
MD02G1022900	GO:0005545(1-phosphatidylinositol binding);GO:0005794(Golgi apparatus);GO:0005886(plasma membrane);GO:0005905(clathrin-coated pit);GO:0006897(endocytosis);GO:0030136(clathrin-coated vesicle);GO:0030276(clathrin binding);GO:0048268(clathrin coat assembly)	01210(2-Oxocarboxylic acid metabolism);01230(Biosynthesis of amino acids);00290(Valine, leucine and isoleucine biosynthesis);00770(Pantothenate and CoA biosynthesis)	K01687	EC:4.2.1.9	PREDICTED: putative clathrin assembly protein At5g35200 [Malus domestica]	11.6631	49.9594	4.28354	2.09881	0.00294195	0.0465883
MD02G1026500	GO:0000977(RNA polymerase II regulatory region sequence-specific DNA binding);GO:0003700(transcription factor activity, sequence-specific DNA binding);GO:0005634(nucleus);GO:0006357(regulation of transcription from RNA polymerase II promoter)	NA	NA	NA	PREDICTED: zinc finger BED domain-containing protein DAYSLEEPER-like [Malus domestica]	5.75494	17.4445	3.03122	1.5999	0.0235286	0.196679
MD02G1030000	GO:0008150(biological_process);GO:0009507(chloroplast)	NA	NA	NA	PREDICTED: uncharacterized protein LOC103448064 [Malus domestica]	16.1661	84.7015	5.23945	2.38942	0.000761713	0.0173833
MD02G1032700	GO:0005886(plasma membrane);GO:0016021(integral component of membrane);GO:0042626(ATPase activity, coupled to transmembrane movement of substances)	02010(ABC transporters)	K05681	NA	PREDICTED: pleiotropic drug resistance protein 1-like [Malus domestica]	0.257458	1.18164	4.58963	2.19838	0.00262516	0.0427256
MD02G1041600	GO:0005739(mitochondrion)	NA	NA	NA	PREDICTED: tudor domain-containing protein 3-like isoform X2 [Malus domestica]	2.55139	14.2196	5.57326	2.47852	0.000659688	0.0156322
MD02G1042800	GO:0005351(sugar:proton symporter activity);GO:0008643(carbohydrate transport);GO:0015144(carbohydrate transmembrane transporter activity);GO:0016020(membrane);GO:0016021(integral component of membrane);GO:0022891(substrate-specific transmembrane transporter activity);GO:0031969(chloroplast membrane);GO:0055085(transmembrane transport)	NA	NA	NA	PREDICTED: probable plastidic glucose transporter 2 [Malus domestica]	22.327	73.9476	3.31203	1.72772	0.0140149	0.1405
MD02G1044300	GO:0005737(cytoplasm);GO:0006952(defense response);GO:0007165(signal transduction);GO:0016021(integral component of membrane);GO:0043531(ADP binding)	04141(Protein processing in endoplasmic reticulum)	K08852	EC:2.7.11.1;EC:3.1.26.-	PREDICTED: TMV resistance protein N-like isoform X2 [Malus domestica]	0.854561	3.51801	4.11674	2.0415	0.00433696	0.0610672
MD02G1047200	GO:0003674(molecular_function);GO:0005634(nucleus);GO:0008150(biological_process);GO:0009507(chloroplast)	NA	NA	NA	PREDICTED: coiled-coil domain-containing protein 9 [Malus domestica]	63.565	254.387	4.002	2.00072	0.00450467	0.062925
MD02G1062600	NA	NA	NA	NA	PREDICTED: uncharacterized protein LOC103426633 [Malus domestica]	22.4452	66.7988	2.97609	1.57342	0.0253781	0.205768
MD02G1063200	GO:0005515(protein binding)	04141(Protein processing in endoplasmic reticulum)	K08852	EC:2.7.11.1;EC:3.1.26.-	PREDICTED: TMV resistance protein N-like [Pyrus x bretschneideri]	0.874724	2.37224	2.71198	1.43935	0.0481555	0.29927
MD02G1070300	GO:0005515(protein binding);GO:0005524(ATP binding);GO:0005576(extracellular region);GO:0006952(defense response);GO:0043531(ADP binding)	03040(Spliceosome)	K12818	EC:3.6.4.13	PREDICTED: putative disease resistance protein RGA3 [Malus domestica]	1.00311	3.68705	3.67562	1.87799	0.00822131	0.0981706
MD02G1072300	GO:0003674(molecular_function);GO:0005634(nucleus);GO:0008150(biological_process);GO:0016021(integral component of membrane)	NA	NA	NA	PREDICTED: uncharacterized protein LOC103449950 [Malus domestica]	9.61171	29.0538	3.02275	1.59586	0.0239197	0.19861
MD02G1075800	GO:0005737(cytoplasm);GO:0005829(cytosol);GO:0006535(cysteine biosynthetic process from serine);GO:0009001(serine O-acetyltransferase activity)	01200(Carbon metabolism);01230(Biosynthesis of amino acids);00920(Sulfur metabolism);00270(Cysteine and methionine metabolism)	K00640	EC:2.3.1.30	PREDICTED: serine acetyltransferase 5-like [Malus domestica]	10.6964	31.8775	2.9802	1.57541	0.0255783	0.206715
MD02G1080500	NA	04141(Protein processing in endoplasmic reticulum)	K07953	EC:3.6.5.-	PREDICTED: GTP-binding protein SAR1A-like [Gossypium hirsutum]	3.53042	9.88397	2.79966	1.48525	0.041952	0.276038
MD02G1082300	GO:0005516(calmodulin binding);GO:0005634(nucleus);GO:0005737(cytoplasm)	NA	NA	NA	PREDICTED: IQ domain-containing protein IQM1-like [Malus domestica]	1.85405	8.83296	4.76414	2.25222	0.00162214	0.0302557
MD02G1082500	GO:0003674(molecular_function);GO:0005634(nucleus);GO:0008150(biological_process)	NA	NA	NA	PREDICTED: uncharacterized protein LOC103940922 [Pyrus x bretschneideri]	2.93189	28.3634	9.67411	3.27413	1.07034e-05	0.000639045
MD02G1083800	GO:0005576(extracellular region);GO:0005829(cytosol);GO:0016757(transferase activity, transferring glycosyl groups)	00942(Anthocyanin biosynthesis)	K12937	EC:2.4.1.254	PREDICTED: UDP-glycosyltransferase 91C1-like isoform X2 [Malus domestica]	0.729503	3.15109	4.3195	2.11086	0.00379717	0.0556959
MD02G1084000	GO:0005576(extracellular region);GO:0005829(cytosol);GO:0016757(transferase activity, transferring glycosyl groups)	00942(Anthocyanin biosynthesis)	K12937	EC:2.4.1.254	PREDICTED: UDP-glycosyltransferase 91C1-like [Malus domestica]	11.7557	104.61	8.89864	3.15359	1.37719e-05	0.000781446
MD02G1084400	GO:0004674(protein serine/threonine kinase activity);GO:0005622(intracellular);GO:0018105(peptidyl-serine phosphorylation);GO:0035556(intracellular signal transduction)	04626(Plant-pathogen interaction)	K13412	EC:2.7.11.1	PREDICTED: serine/threonine-protein kinase tricorner-like isoform X1 [Pyrus x bretschneideri]	0.582404	2.42151	4.15778	2.05581	0.00481087	0.0659534
MD02G1086200	GO:0003677(DNA binding);GO:0003700(transcription factor activity, sequence-specific DNA binding);GO:0005634(nucleus);GO:0006351(transcription, DNA-templated);GO:0006355(regulation of transcription, DNA-templated);GO:0016602(CCAAT-binding factor complex)	00970(Aminoacyl-tRNA biosynthesis)	K01883	EC:6.1.1.16	PREDICTED: nuclear transcription factor Y subunit A-3-like [Malus domestica]	3.53267	10.3018	2.91616	1.54407	0.0292262	0.224523
MD02G1090000	GO:0005737(cytoplasm);GO:0009524(phragmoplast)	NA	NA	NA	PREDICTED: MOB kinase activator-like 1A isoform X2 [Pyrus x bretschneideri]	0.835981	39.7121	47.5036	5.56997	6.54571e-12	4.1578e-09
MD02G1091000	GO:0004596(peptide alpha-N-acetyltransferase activity);GO:0006474(N-terminal protein amino acid acetylation);GO:0031248(protein acetyltransferase complex)	01200(Carbon metabolism);01230(Biosynthesis of amino acids);00010(Glycolysis / Gluconeogenesis);00260(Glycine, serine and threonine metabolism)	K01834	EC:5.4.2.11	PREDICTED: uncharacterized protein LOC103427977 [Malus domestica]	1.37288	10.4213	7.59083	2.92426	6.33727e-05	0.00262732
MD02G1096100	GO:0003714(transcription corepressor activity);GO:0005634(nucleus);GO:0009611(response to wounding);GO:0031347(regulation of defense response);GO:1903507(negative regulation of nucleic acid-templated transcription);GO:2000022(regulation of jasmonic acid mediated signaling pathway)	04075(Plant hormone signal transduction)	K13464	NA	PREDICTED: protein TIFY 10A [Malus domestica]	6.13801	20.4768	3.33607	1.73815	0.0139689	0.140284
MD02G1101700	GO:0005515(protein binding)	03040(Spliceosome);04141(Protein processing in endoplasmic reticulum);04144(Endocytosis)	K03283	NA	PREDICTED: TMV resistance protein N-like isoform X1 [Malus domestica]	0.681972	2.2225	3.25893	1.7044	0.0169834	0.157324
MD02G1105900	GO:0003714(transcription corepressor activity);GO:0005634(nucleus);GO:0009611(response to wounding);GO:0031347(regulation of defense response);GO:1903507(negative regulation of nucleic acid-templated transcription);GO:2000022(regulation of jasmonic acid mediated signaling pathway)	04075(Plant hormone signal transduction)	K13464	NA	PREDICTED: protein TIFY 3-like [Malus domestica]	2.16079	23.7127	10.9741	3.45603	3.05279e-06	0.000234256
MD02G1106700	GO:0005737(cytoplasm);GO:0006952(defense response);GO:0007165(signal transduction);GO:0016021(integral component of membrane);GO:0043531(ADP binding)	03040(Spliceosome);04141(Protein processing in endoplasmic reticulum);04144(Endocytosis)	K03283	NA	PREDICTED: protein SUPPRESSOR OF npr1-1, CONSTITUTIVE 1-like, partial [Malus domestica]	1.05056	3.2485	3.09216	1.62862	0.023673	0.197406
MD02G1107500	GO:0004252(serine-type endopeptidase activity);GO:0005618(cell wall)	04144(Endocytosis)	K18443	NA	PREDICTED: subtilisin-like protease SBT5.4 [Malus domestica]	1.43031	4.7397	3.31375	1.72846	0.0149909	0.146557
MD02G1109700	GO:0005515(protein binding)	00500(Starch and sucrose metabolism)	K00695	EC:2.4.1.13	PREDICTED: TMV resistance protein N-like [Pyrus x bretschneideri]	0.833126	3.03486	3.64274	1.86503	0.00898682	0.103841
MD02G1110700	GO:0000989(transcription factor activity, transcription factor binding);GO:0005634(nucleus);GO:0006355(regulation of transcription, DNA-templated);GO:0009640(photomorphogenesis)	NA	NA	NA	PREDICTED: B-box zinc finger protein 19-like [Malus domestica]	2.04636	19.8342	9.69244	3.27686	7.96254e-06	0.000512899
MD02G1114100	GO:0004970(ionotropic glutamate receptor activity);GO:0005217(intracellular ligand-gated ion channel activity);GO:0005576(extracellular region);GO:0006874(cellular calcium ion homeostasis);GO:0009416(response to light stimulus);GO:0009611(response to wounding);GO:0009864(induced systemic resistance, jasmonic acid mediated signaling pathway);GO:0016021(integral component of membrane)	NA	NA	NA	PREDICTED: glutamate receptor 3.6-like [Pyrus x bretschneideri]	1.03074	3.68233	3.5725	1.83693	0.00997185	0.111124
MD02G1115200	GO:0005524(ATP binding);GO:0005634(nucleus);GO:0005737(cytoplasm);GO:0006952(defense response);GO:0007165(signal transduction);GO:0009817(defense response to fungus, incompatible interaction);GO:0009861(jasmonic acid and ethylene-dependent systemic resistance);GO:0043531(ADP binding);GO:2000071(regulation of defense response by callose deposition)	03030(DNA replication);03420(Nucleotide excision repair);03430(Mismatch repair);03440(Homologous recombination)	K07466	NA	HD domain class transcription factor [Malus domestica]	2.59637	10.4519	4.02557	2.00919	0.00454594	0.0633467
MD02G1119600	GO:0000103(sulfate assimilation);GO:0005737(cytoplasm);GO:0005829(cytosol);GO:0006535(cysteine biosynthetic process from serine);GO:0009001(serine O-acetyltransferase activity);GO:0016407(acetyltransferase activity)	01200(Carbon metabolism);01230(Biosynthesis of amino acids);00920(Sulfur metabolism);00270(Cysteine and methionine metabolism)	K00640	EC:2.3.1.30	PREDICTED: serine acetyltransferase 2 isoform X1 [Malus domestica]	4.0006	11.0204	2.75469	1.46189	0.0388302	0.265018
MD02G1123500	GO:0005886(plasma membrane);GO:0009507(chloroplast);GO:0033743(peptide-methionine (R)-S-oxide reductase activity);GO:0055114(oxidation-reduction process)	NA	NA	NA	PREDICTED: uncharacterized protein LOC103407042 [Malus domestica]	16.9506	57.7299	3.40578	1.76799	0.012391	0.129027
MD02G1123800	GO:0008270(zinc ion binding);GO:0009535(chloroplast thylakoid membrane);GO:0016021(integral component of membrane)	NA	NA	NA	PREDICTED: LOW QUALITY PROTEIN: NEP1-interacting protein-like 1 [Malus domestica]	3.48187	12.3942	3.55963	1.83173	0.00954704	0.108145
MD02G1128300	GO:0005783(endoplasmic reticulum);GO:0010105(negative regulation of ethylene-activated signaling pathway)	04075(Plant hormone signal transduction)	K14489	EC:2.7.13.3	PREDICTED: LOW QUALITY PROTEIN: histidine kinase 1-like [Malus domestica]	0.416833	1.34708	3.23171	1.6923	0.0195002	0.17278
MD02G1129500	GO:0004792(thiosulfate sulfurtransferase activity);GO:0005737(cytoplasm);GO:0009507(chloroplast);GO:0016740(transferase activity)	NA	NA	NA	PREDICTED: thiosulfate sulfurtransferase 18-like isoform X2 [Malus domestica]	10.1041	164.839	16.3142	4.02806	8.32673e-08	1.26938e-05
MD02G1130500	GO:0005739(mitochondrion)	00190(Oxidative phosphorylation)	K02265	NA	PREDICTED: EH domain-containing protein 2-like isoform X2 [Pyrus x bretschneideri]	2.3746	8.99679	3.78877	1.92173	0.0076001	0.0928819
MD02G1133200	GO:0003674(molecular_function);GO:0008150(biological_process);GO:0009507(chloroplast);GO:0009535(chloroplast thylakoid membrane);GO:0016021(integral component of membrane)	NA	NA	NA	PREDICTED: uncharacterized protein LOC103400680 [Malus domestica]	2.19056	16.5058	7.53497	2.9136	7.73669e-05	0.00307678
MD02G1134400	GO:0000786(nucleosome);GO:0003677(DNA binding);GO:0005634(nucleus);GO:0006334(nucleosome assembly);GO:0009414(response to water deprivation);GO:0031492(nucleosomal DNA binding)	NA	NA	NA	PREDICTED: histone H1-like [Malus domestica]	17.1967	117.329	6.82274	2.77035	0.000111534	0.00411363
MD02G1140000	NA	NA	NA	NA	water stress-inducible protein Rab21-like [Malus domestica]	746.757	2073.95	2.77727	1.47367	0.03624	0.255456
MD02G1141400	GO:0005524(ATP binding);GO:0005783(endoplasmic reticulum);GO:0016021(integral component of membrane);GO:0016887(ATPase activity)	03008(Ribosome biogenesis in eukaryotes)	K14571	NA	PREDICTED: AAA-ATPase At2g18193-like [Malus domestica]	0.698178	5.0473	7.22925	2.85385	9.98071e-05	0.00374146
MD02G1146300	GO:0003677(DNA binding);GO:0003700(transcription factor activity, sequence-specific DNA binding);GO:0005515(protein binding);GO:0005634(nucleus);GO:0006351(transcription, DNA-templated);GO:0006355(regulation of transcription, DNA-templated);GO:0046872(metal ion binding)	NA	NA	NA	PREDICTED: zinc-finger homeodomain protein 6-like [Malus domestica]	3.90544	18.1677	4.65188	2.21781	0.00189226	0.0335949
MD02G1148800	GO:0003700(transcription factor activity, sequence-specific DNA binding);GO:0005634(nucleus);GO:0006355(regulation of transcription, DNA-templated);GO:0043565(sequence-specific DNA binding)	04075(Plant hormone signal transduction)	K14494	NA	PREDICTED: scarecrow-like protein 4 [Malus domestica]	5.48899	22.104	4.02697	2.00969	0.00444985	0.062388
MD02G1156800	GO:0003677(DNA binding);GO:0003700(transcription factor activity, sequence-specific DNA binding);GO:0005634(nucleus);GO:0006351(transcription, DNA-templated);GO:0006355(regulation of transcription, DNA-templated);GO:0009965(leaf morphogenesis)	NA	NA	NA	PREDICTED: BEL1-like homeodomain protein 2 [Malus domestica]	2.82712	7.79449	2.75704	1.46312	0.0388598	0.265018
MD02G1157100	GO:0003674(molecular_function);GO:0005634(nucleus);GO:0008150(biological_process)	NA	NA	NA	PREDICTED: uncharacterized protein LOC103426817 [Malus domestica]	1.52764	5.09377	3.3344	1.73743	0.0145464	0.144059
MD02G1163500	GO:0003677(DNA binding);GO:0003700(transcription factor activity, sequence-specific DNA binding);GO:0005634(nucleus);GO:0006351(transcription, DNA-templated);GO:0006355(regulation of transcription, DNA-templated);GO:0044212(transcription regulatory region DNA binding);GO:0046872(metal ion binding);GO:0048364(root development)	04712(Circadian rhythm - plant)	K16222	NA	PREDICTED: dof zinc finger protein DOF3.7-like [Malus domestica]	4.00019	11.2547	2.81354	1.49238	0.0362251	0.25543
MD02G1173600	GO:0004702(receptor signaling protein serine/threonine kinase activity);GO:0005737(cytoplasm)	04626(Plant-pathogen interaction)	K05391	NA	PREDICTED: mitogen-activated protein kinase kinase kinase 3 [Malus domestica]	1.20666	3.50796	2.90715	1.53961	0.0337963	0.245177
MD02G1173800	NA	NA	NA	NA	PREDICTED: uncharacterized protein LOC103931175 [Pyrus x bretschneideri]	1.35095	3.71426	2.74936	1.4591	0.04719	0.296383
MD02G1179500	NA	NA	NA	NA	-	1.7684	8.24902	4.66468	2.22178	0.00198394	0.0348976
MD02G1180800	GO:0000166(nucleotide binding);GO:0004872(receptor activity);GO:0005515(protein binding);GO:0005739(mitochondrion);GO:0071493(cellular response to UV-B);GO:0080008(Cul4-RING E3 ubiquitin ligase complex)	04140(Regulation of autophagy)	K08332	NA	PREDICTED: uncharacterized protein LOC103957396 [Pyrus x bretschneideri]	0.343574	2.55031	7.42288	2.89198	8.22903e-05	0.00321664
MD02G1182500	GO:0004871(signal transducer activity);GO:0005886(plasma membrane);GO:0009416(response to light stimulus);GO:0016567(protein ubiquitination)	00902(Monoterpenoid biosynthesis)	K15095	EC:1.1.1.208	PREDICTED: BTB/POZ domain-containing protein At5g67385-like [Malus domestica]	1.64209	9.57882	5.83331	2.54431	0.000386322	0.0104545
MD02G1182900	GO:0005737(cytoplasm);GO:0031625(ubiquitin protein ligase binding);GO:0061630(ubiquitin protein ligase activity)	04141(Protein processing in endoplasmic reticulum);04120(Ubiquitin mediated proteolysis)	K10575	EC:2.3.2.23	PREDICTED: ubiquitin-conjugating enzyme E2 7 [Malus domestica]	68.6497	275.025	4.00621	2.00224	0.00449795	0.0628696
MD02G1183500	GO:0004871(signal transducer activity);GO:0005886(plasma membrane);GO:0009416(response to light stimulus);GO:0009958(positive gravitropism);GO:0016567(protein ubiquitination);GO:0071944(cell periphery)	00902(Monoterpenoid biosynthesis)	K15095	EC:1.1.1.208	PREDICTED: BTB/POZ domain-containing protein NPY2-like [Malus domestica]	0.38521	1.23181	3.19777	1.67707	0.0215909	0.185399
MD02G1184400	GO:0003712(transcription cofactor activity);GO:0004402(histone acetyltransferase activity);GO:0005516(calmodulin binding);GO:0005634(nucleus);GO:0005737(cytoplasm);GO:0006355(regulation of transcription, DNA-templated);GO:0008270(zinc ion binding);GO:0009409(response to cold);GO:0009733(response to auxin);GO:0009751(response to salicylic acid);GO:0010200(response to chitin);GO:0016567(protein ubi…	00903(Limonene and pinene degradation);00945(Stilbenoid, diarylheptanoid and gingerol biosynthesis)	K00517	NA	PREDICTED: BTB/POZ and TAZ domain-containing protein 4 [Malus domestica]	7.63088	27.1909	3.56327	1.8332	0.00930191	0.106332
MD02G1194100	GO:0004674(protein serine/threonine kinase activity);GO:0005524(ATP binding);GO:0005886(plasma membrane);GO:0006468(protein phosphorylation);GO:0007169(transmembrane receptor protein tyrosine kinase signaling pathway);GO:0010102(lateral root morphogenesis);GO:0010468(regulation of gene expression);GO:0016021(integral component of membrane);GO:0016301(kinase activity)	04075(Plant hormone signal transduction)	K13415	EC:2.7.10.1;EC:2.7.11.1	PREDICTED: LRR receptor-like serine/threonine-protein kinase HSL2 [Pyrus x bretschneideri]	1.82714	6.04921	3.31076	1.72716	0.014541	0.144059
MD02G1194600	GO:0004674(protein serine/threonine kinase activity);GO:0005515(protein binding);GO:0005524(ATP binding);GO:0005886(plasma membrane);GO:0006468(protein phosphorylation);GO:0007169(transmembrane receptor protein tyrosine kinase signaling pathway);GO:0009934(regulation of meristem structural organization);GO:0010075(regulation of meristem growth);GO:0010480(microsporocyte differentiation);GO:001602…	04075(Plant hormone signal transduction)	K13415	EC:2.7.10.1;EC:2.7.11.1	PREDICTED: leucine-rich repeat receptor-like serine/threonine-protein kinase BAM1 [Malus domestica]	1.31226	12.4913	9.5189	3.25079	8.97717e-06	0.000564375
MD02G1196100	GO:0003677(DNA binding);GO:0003700(transcription factor activity, sequence-specific DNA binding);GO:0005634(nucleus);GO:0006351(transcription, DNA-templated);GO:0006355(regulation of transcription, DNA-templated);GO:0008361(regulation of cell size);GO:0048364(root development);GO:1900056(negative regulation of leaf senescence)	04712(Circadian rhythm - plant)	K16221	NA	PREDICTED: transcription factor TCP9-like [Malus domestica]	1.39289	4.50874	3.23696	1.69464	0.0200824	0.17588
MD02G1200700	GO:0004497(monooxygenase activity);GO:0005506(iron ion binding);GO:0005783(endoplasmic reticulum);GO:0016021(integral component of membrane);GO:0016705(oxidoreductase activity, acting on paired donors, with incorporation or reduction of molecular oxygen);GO:0019825(oxygen binding);GO:0020037(heme binding);GO:0055114(oxidation-reduction process)	00073(Cutin, suberine and wax biosynthesis)	K15402	EC:1.14.-.-	PREDICTED: cytochrome P450 704C1 [Malus domestica]	1.04352	6.85933	6.57324	2.71661	0.000201442	0.00638886
MD02G1233200	GO:0003674(molecular_function);GO:0008150(biological_process);GO:0016021(integral component of membrane)	NA	NA	NA	PREDICTED: protein NUCLEAR FUSION DEFECTIVE 4-like [Malus domestica]	0.954478	2.589	2.71247	1.43961	0.047354	0.29679
MD02G1243100	GO:0005737(cytoplasm);GO:0005739(mitochondrion);GO:0005975(carbohydrate metabolic process);GO:0006099(tricarboxylic acid cycle);GO:0006108(malate metabolic process);GO:0008746(NAD(P)+ transhydrogenase activity);GO:0009507(chloroplast);GO:0009570(chloroplast stroma);GO:0009579(thylakoid);GO:0009941(chloroplast envelope);GO:0016615(malate dehydrogenase activity);GO:0030060(L-malate dehydrogenase ac…	01200(Carbon metabolism);00620(Pyruvate metabolism);00710(Carbon fixation in photosynthetic organisms)	K00051	EC:1.1.1.82	PREDICTED: malate dehydrogenase [NADP], chloroplastic-like [Malus domestica]	38.2638	118.444	3.09545	1.63015	0.0204254	0.178134
MD02G1252800	NA	NA	NA	NA	PREDICTED: putative disease resistance RPP13-like protein 1 [Malus domestica]	3.48656	10.5876	3.03668	1.6025	0.0237135	0.197538
MD02G1254300	GO:0005886(plasma membrane)	00520(Amino sugar and nucleotide sugar metabolism)	K01183	EC:3.2.1.14	PREDICTED: rust resistance kinase Lr10-like [Malus domestica]	1.49412	9.96548	6.66977	2.73764	0.000156631	0.00530619
MD02G1257600	GO:0016020(membrane);GO:0016709(oxidoreductase activity, acting on paired donors, with incorporation or reduction of molecular oxygen, NAD(P)H as one donor, and incorporation of one atom of oxygen);GO:0044550(secondary metabolite biosynthetic process)	00941(Flavonoid biosynthesis);00944(Flavone and flavonol biosynthesis)	K05280	EC:1.14.13.21	PREDICTED: cytochrome P450 76M5-like isoform X1 [Malus domestica]	7.3867	36.64	4.96027	2.31042	0.00125726	0.0253973
MD02G1258000	GO:0005739(mitochondrion);GO:0005759(mitochondrial matrix)	NA	NA	NA	PREDICTED: uncharacterized protein At2g39795, mitochondrial-like [Malus domestica]	11.0298	29.0479	2.63358	1.39703	0.0481637	0.29927
MD02G1262400	GO:0004672(protein kinase activity);GO:0004674(protein serine/threonine kinase activity);GO:0005524(ATP binding);GO:0005886(plasma membrane);GO:0006468(protein phosphorylation);GO:0007169(transmembrane receptor protein tyrosine kinase signaling pathway);GO:0016021(integral component of membrane)	04626(Plant-pathogen interaction)	K13459	NA	PREDICTED: probable inactive leucine-rich repeat receptor-like protein kinase At3g03770 [Malus domestica]	5.99028	31.0462	5.18276	2.37372	0.000821741	0.0182612
MD02G1264400	GO:0005507(copper ion binding);GO:0016722(oxidoreductase activity, oxidizing metal ions)	00053(Ascorbate and aldarate metabolism)	K00423	EC:1.10.3.3	PREDICTED: putative laccase-9 [Pyrus x bretschneideri]	7.54446	31.6819	4.19936	2.07017	0.0033549	0.0509745
MD02G1264800	GO:0005737(cytoplasm);GO:0006952(defense response);GO:0007165(signal transduction);GO:0016021(integral component of membrane);GO:0043531(ADP binding)	03040(Spliceosome);04141(Protein processing in endoplasmic reticulum);04144(Endocytosis)	K03283	NA	PREDICTED: TMV resistance protein N-like [Pyrus x bretschneideri]	1.75604	5.29233	3.01378	1.59157	0.0249175	0.203933
MD02G1264900	NA	NA	NA	NA	PREDICTED: TMV resistance protein N-like [Pyrus x bretschneideri]	1.24085	3.9096	3.15076	1.6557	0.0219399	0.187362
MD02G1275100	GO:0004497(monooxygenase activity);GO:0007275(multicellular organism development);GO:0010268(brassinosteroid homeostasis);GO:0016125(sterol metabolic process);GO:0016132(brassinosteroid biosynthetic process)	NA	NA	NA	PREDICTED: cytochrome P450 71A14-like [Pyrus x bretschneideri]	4.65488	16.9283	3.63669	1.86263	0.00835875	0.0991387
MD02G1276600	GO:0005634(nucleus);GO:0008152(metabolic process);GO:0052689(carboxylic ester hydrolase activity)	04075(Plant hormone signal transduction)	K14493	EC:3.-.-.-	CXE carboxylesterase [Malus pumila]	3.147	14.1171	4.4859	2.1654	0.00241104	0.0402726
MD02G1290900	GO:0003674(molecular_function);GO:0005634(nucleus);GO:0006351(transcription, DNA-templated);GO:0006355(regulation of transcription, DNA-templated);GO:0008150(biological_process);GO:0048511(rhythmic process)	NA	NA	NA	PREDICTED: protein LNK2 isoform X1 [Malus domestica]	1.11312	17.5063	15.7273	3.9752	1.27023e-07	1.78199e-05
MD02G1291300	GO:0005509(calcium ion binding);GO:0005544(calcium-dependent phospholipid binding);GO:0005773(vacuole);GO:0009408(response to heat);GO:0009409(response to cold);GO:0009414(response to water deprivation);GO:0009507(chloroplast);GO:0009651(response to salt stress);GO:0009986(cell surface)	NA	NA	NA	PREDICTED: annexin D3 [Malus domestica]	3.64461	11.5869	3.17917	1.66865	0.0188542	0.16888
MD02G1293400	GO:0000398(mRNA splicing, via spliceosome);GO:0005634(nucleus);GO:0005681(spliceosomal complex);GO:0005829(cytosol);GO:0005886(plasma membrane);GO:0009507(chloroplast)	03040(Spliceosome)	K12874	NA	PREDICTED: intron-binding protein aquarius [Malus domestica]	2.26404	7.53224	3.3269	1.73418	0.0141192	0.141173
MD02G1296000	GO:0004497(monooxygenase activity);GO:0005506(iron ion binding);GO:0005783(endoplasmic reticulum);GO:0005789(endoplasmic reticulum membrane);GO:0009507(chloroplast);GO:0010345(suberin biosynthetic process);GO:0016021(integral component of membrane);GO:0016705(oxidoreductase activity, acting on paired donors, with incorporation or reduction of molecular oxygen);GO:0019825(oxygen binding);GO:002003…	00073(Cutin, suberine and wax biosynthesis)	K15402	EC:1.14.-.-	PREDICTED: cytochrome P450 86B1-like [Malus domestica]	6.11864	20.5297	3.35528	1.74643	0.0131989	0.134931
MD02G1300300	GO:0003674(molecular_function);GO:0005886(plasma membrane);GO:0016021(integral component of membrane)	NA	NA	NA	PREDICTED: protein PNS1-like [Malus domestica]	21.5142	63.2766	2.94115	1.55638	0.0269574	0.212983
MD02G1300400	GO:0006475(internal protein amino acid acetylation);GO:0017198(N-terminal peptidyl-serine acetylation);GO:0018002(N-terminal peptidyl-glutamic acid acetylation);GO:0022626(cytosolic ribosome);GO:0031415(NatA complex);GO:1990189(peptide-serine-N-acetyltransferase activity);GO:1990190(peptide-glutamate-N-acetyltransferase activity)	NA	NA	NA	PREDICTED: N-alpha-acetyltransferase daf-31-like [Malus domestica]	32.6364	123.272	3.77713	1.91729	0.00645901	0.0825129
MD02G1301500	GO:0003824(catalytic activity);GO:0005737(cytoplasm);GO:0008168(methyltransferase activity);GO:0032259(methylation)	NA	NA	NA	PREDICTED: methyltransferase-like protein 13 isoform X2 [Malus domestica]	1.17271	4.55696	3.88583	1.95822	0.00675142	0.0850604
MD02G1303400	GO:0004022(alcohol dehydrogenase (NAD) activity);GO:0005794(Golgi apparatus);GO:0005829(cytosol);GO:0005886(plasma membrane);GO:0009506(plasmodesma);GO:0050662(coenzyme binding)	00940(Phenylpropanoid biosynthesis)	K09753	EC:1.2.1.44	PREDICTED: cinnamoyl-CoA reductase 1-like [Malus domestica]	6.06128	18.5342	3.05779	1.61249	0.0224747	0.190063
MD02G1303800	GO:0004022(alcohol dehydrogenase (NAD) activity);GO:0005794(Golgi apparatus);GO:0005829(cytosol);GO:0005886(plasma membrane);GO:0009506(plasmodesma);GO:0050662(coenzyme binding)	00940(Phenylpropanoid biosynthesis)	K09753	EC:1.2.1.44	PREDICTED: uncharacterized protein LOC103945503 [Pyrus x bretschneideri]	0.629005	1.85508	2.94922	1.56033	0.0335868	0.244206
MD02G1314500	GO:0003677(DNA binding);GO:0005634(nucleus);GO:0008150(biological_process);GO:0008270(zinc ion binding)	NA	NA	NA	PREDICTED: zinc finger A20 and AN1 domain-containing stress-associated protein 8-like [Malus domestica]	427.372	1231.15	2.88075	1.52644	0.0299786	0.22741
MD02G1317900	GO:0005737(cytoplasm)	00561(Glycerolipid metabolism);00564(Glycerophospholipid metabolism)	K13506	EC:2.3.1.15	PREDICTED: uncharacterized protein At1g04910-like [Malus domestica]	1.30416	8.41446	6.45203	2.68975	0.000195182	0.00623354
MD02G1318000	GO:0000492(box C/D snoRNP assembly);GO:0001094(TFIID-class transcription factor binding);GO:0042802(identical protein binding);GO:0048254(snoRNA localization);GO:0051117(ATPase binding);GO:0051259(protein oligomerization);GO:0070062(extracellular exosome);GO:0070761(pre-snoRNP complex)	NA	NA	NA	PREDICTED: box C/D snoRNA protein 1-like isoform X2 [Pyrus x bretschneideri]	4.96782	14.1104	2.84036	1.50607	0.0330651	0.24183
MD03G1001700	GO:0000287(magnesium ion binding);GO:0004743(pyruvate kinase activity);GO:0005737(cytoplasm);GO:0005829(cytosol);GO:0006096(glycolytic process);GO:0016301(kinase activity);GO:0030955(potassium ion binding)	01200(Carbon metabolism);01230(Biosynthesis of amino acids);00010(Glycolysis / Gluconeogenesis);00620(Pyruvate metabolism);00230(Purine metabolism)	K00873	EC:2.7.1.40	PREDICTED: pyruvate kinase, cytosolic isozyme [Malus domestica]	22.8364	121.273	5.31051	2.40885	0.000687318	0.0161696
MD03G1002400	GO:0003723(RNA binding);GO:0005515(protein binding);GO:0005634(nucleus);GO:0005737(cytoplasm);GO:0005829(cytosol)	04141(Protein processing in endoplasmic reticulum)	K09503	NA	PREDICTED: YTH domain-containing family protein 2-like isoform X1 [Malus domestica]	2.94814	10.1145	3.43082	1.77855	0.0117942	0.12515
MD03G1002500	GO:0003723(RNA binding);GO:0005515(protein binding);GO:0005634(nucleus);GO:0005737(cytoplasm);GO:0005829(cytosol)	04141(Protein processing in endoplasmic reticulum)	K09503	NA	PREDICTED: uncharacterized protein LOC103964826 isoform X1 [Pyrus x bretschneideri]	94.8545	318.447	3.35721	1.74726	0.0129041	0.132858
MD03G1002600	GO:0004252(serine-type endopeptidase activity);GO:0005618(cell wall)	04144(Endocytosis)	K18443	NA	PREDICTED: subtilisin-like protease SBT3.18 [Malus domestica]	3.14611	10.6264	3.37763	1.75601	0.0129585	0.133238
MD03G1003500	GO:0003674(molecular_function);GO:0005576(extracellular region);GO:0008150(biological_process)	00970(Aminoacyl-tRNA biosynthesis)	K04567	EC:6.1.1.6	PREDICTED: uncharacterized protein LOC103414791 [Malus domestica]	0.574165	3.02369	5.26623	2.39677	0.00100691	0.021359
MD03G1015300	GO:0005515(protein binding);GO:0005524(ATP binding);GO:0005576(extracellular region);GO:0006952(defense response);GO:0043531(ADP binding)	03040(Spliceosome)	K12818	EC:3.6.4.13	PREDICTED: putative disease resistance RPP13-like protein 1 [Pyrus x bretschneideri]	0.532538	2.51254	4.71805	2.23819	0.00188019	0.0334846
MD03G1019100	GO:0009813(flavonoid biosynthetic process);GO:0043231(intracellular membrane-bounded organelle);GO:0052696(flavonoid glucuronidation);GO:0080043(quercetin 3-O-glucosyltransferase activity);GO:0080044(quercetin 7-O-glucosyltransferase activity)	00942(Anthocyanin biosynthesis)	K12937	EC:2.4.1.254	PREDICTED: soyasaponin III rhamnosyltransferase-like [Malus domestica]	0.544729	3.23569	5.94	2.57046	0.00042197	0.0111939
MD03G1024100	GO:0003677(DNA binding);GO:0005634(nucleus);GO:0008150(biological_process);GO:0008270(zinc ion binding)	NA	NA	NA	PREDICTED: zinc finger A20 and AN1 domain-containing stress-associated protein 8-like [Pyrus x bretschneideri]	184.936	535.236	2.89417	1.53315	0.0292819	0.224695
MD03G1028900	GO:0000139(Golgi membrane);GO:0000271(polysaccharide biosynthetic process);GO:0005783(endoplasmic reticulum);GO:0005789(endoplasmic reticulum membrane);GO:0005794(Golgi apparatus);GO:0005886(plasma membrane);GO:0009832(plant-type cell wall biogenesis);GO:0016021(integral component of membrane);GO:0016757(transferase activity, transferring glycosyl groups);GO:0016759(cellulose synthase activity);G…	00500(Starch and sucrose metabolism);00520(Amino sugar and nucleotide sugar metabolism)	K00770	EC:2.4.2.24	PREDICTED: cellulose synthase-like protein E1 isoform X1 [Pyrus x bretschneideri]	1.67042	11.6195	6.95607	2.79827	0.00010734	0.00399762
MD03G1029000	GO:0000139(Golgi membrane);GO:0000271(polysaccharide biosynthetic process);GO:0005783(endoplasmic reticulum);GO:0005789(endoplasmic reticulum membrane);GO:0005794(Golgi apparatus);GO:0005886(plasma membrane);GO:0009832(plant-type cell wall biogenesis);GO:0016021(integral component of membrane);GO:0016757(transferase activity, transferring glycosyl groups);GO:0016759(cellulose synthase activity);G…	00500(Starch and sucrose metabolism);00520(Amino sugar and nucleotide sugar metabolism)	K00770	EC:2.4.2.24	PREDICTED: cellulose synthase-like protein E1 isoform X1 [Pyrus x bretschneideri]	1.29614	11.3419	8.75048	3.12936	1.81539e-05	0.000990754
MD03G1029100	GO:0000139(Golgi membrane);GO:0000271(polysaccharide biosynthetic process);GO:0005783(endoplasmic reticulum);GO:0005789(endoplasmic reticulum membrane);GO:0005794(Golgi apparatus);GO:0005886(plasma membrane);GO:0009832(plant-type cell wall biogenesis);GO:0016021(integral component of membrane);GO:0016757(transferase activity, transferring glycosyl groups);GO:0016759(cellulose synthase activity);G…	00500(Starch and sucrose metabolism);00520(Amino sugar and nucleotide sugar metabolism)	K00770	EC:2.4.2.24	PREDICTED: cellulose synthase-like protein E6 [Pyrus x bretschneideri]	26.4211	74.6898	2.8269	1.49922	0.03317	0.242105
MD03G1038300	NA	NA	NA	NA	PREDICTED: uncharacterized protein LOC108171868 [Malus domestica]	2.87505	8.5091	2.95964	1.56542	0.0277728	0.216973
MD03G1041200	GO:0003676(nucleic acid binding);GO:0003723(RNA binding);GO:0005634(nucleus);GO:0008150(biological_process)	NA	NA	NA	PREDICTED: KH domain-containing protein At5g56140 [Malus domestica]	20.2326	59.6513	2.94828	1.55987	0.026993	0.213065
MD03G1041400	GO:0003676(nucleic acid binding);GO:0003723(RNA binding);GO:0005634(nucleus);GO:0008150(biological_process)	NA	NA	NA	PREDICTED: KH domain-containing protein At5g56140 [Malus domestica]	27.8964	83.9828	3.01053	1.59002	0.0238986	0.198579
MD03G1045400	GO:0005515(protein binding);GO:0005524(ATP binding);GO:0005576(extracellular region);GO:0006952(defense response);GO:0043531(ADP binding)	03040(Spliceosome)	K12818	EC:3.6.4.13	PREDICTED: putative disease resistance protein RGA4 [Malus domestica]	0.452956	1.50527	3.32322	1.73258	0.0162698	0.152789
MD03G1049900	GO:0003677(DNA binding);GO:0003700(transcription factor activity, sequence-specific DNA binding);GO:0005515(protein binding);GO:0005634(nucleus);GO:0005737(cytoplasm);GO:0006351(transcription, DNA-templated);GO:0006355(regulation of transcription, DNA-templated);GO:0009736(cytokinin-activated signaling pathway);GO:0009873(ethylene-activated signaling pathway);GO:0042991(transcription factor impor…	04626(Plant-pathogen interaction)	K13434	NA	transcription factor ERF9 [Eriobotrya japonica]	24.8	78.2882	3.15678	1.65845	0.0185028	0.166793
MD03G1053100	GO:0003729(mRNA binding);GO:0003735(structural constituent of ribosome);GO:0022627(cytosolic small ribosomal subunit)	03010(Ribosome)	K02976	NA	PREDICTED: 40S ribosomal protein S26-3-like [Pyrus x bretschneideri]	56.9756	149	2.61514	1.38689	0.0492477	0.30224
MD03G1054700	GO:0004672(protein kinase activity);GO:0004674(protein serine/threonine kinase activity);GO:0005515(protein binding);GO:0005524(ATP binding);GO:0005886(plasma membrane);GO:0006468(protein phosphorylation);GO:0007165(signal transduction);GO:0009268(response to pH);GO:0016301(kinase activity)	04075(Plant hormone signal transduction)	K14498	EC:2.7.11.1	PREDICTED: CBL-interacting serine/threonine-protein kinase 11-like [Malus domestica]	15.4886	46.5724	3.00689	1.58827	0.0241204	0.199725
MD03G1062600	NA	NA	NA	NA	PREDICTED: pentatricopeptide repeat-containing protein At2g30100, chloroplastic [Malus domestica]	8.25617	22.6501	2.74342	1.45597	0.0390522	0.265539
MD03G1065600	GO:0004722(protein serine/threonine phosphatase activity);GO:0005634(nucleus);GO:0006470(protein dephosphorylation);GO:0009536(plastid);GO:0009611(response to wounding);GO:0009620(response to fungus);GO:0009738(abscisic acid-activated signaling pathway);GO:0046872(metal ion binding);GO:0050832(defense response to fungus)	NA	NA	NA	PREDICTED: probable protein phosphatase 2C 25 [Malus domestica]	3.8681	10.9953	2.84255	1.50718	0.0339109	0.245703
MD03G1067800	GO:0005515(protein binding);GO:0005524(ATP binding);GO:0005576(extracellular region);GO:0006952(defense response);GO:0043531(ADP binding)	03040(Spliceosome)	K12818	EC:3.6.4.13	PREDICTED: putative disease resistance protein RGA3 [Malus domestica]	0.511307	1.47087	2.87668	1.52441	0.0374206	0.259695
MD03G1068500	GO:0005524(ATP binding);GO:0005634(nucleus);GO:0005737(cytoplasm);GO:0006351(transcription, DNA-templated);GO:0006355(regulation of transcription, DNA-templated);GO:0016787(hydrolase activity);GO:0019538(protein metabolic process);GO:1902347(response to strigolactone)	NA	NA	NA	PREDICTED: protein SMAX1-LIKE 6-like [Malus domestica]	3.07393	8.12616	2.64357	1.40249	0.0473791	0.29679
MD03G1072200	GO:0005515(protein binding);GO:0005524(ATP binding);GO:0005576(extracellular region);GO:0006952(defense response);GO:0043531(ADP binding)	01230(Biosynthesis of amino acids);00400(Phenylalanine, tyrosine and tryptophan biosynthesis)	K01657	EC:4.1.3.27	PREDICTED: putative disease resistance RPP13-like protein 1 [Pyrus x bretschneideri]	0.681237	2.54017	3.72876	1.89869	0.00815319	0.0975609
MD03G1072300	GO:0004842(ubiquitin-protein transferase activity);GO:0005634(nucleus);GO:0006511(ubiquitin-dependent protein catabolic process);GO:0007093(mitotic cell cycle checkpoint)	01230(Biosynthesis of amino acids);00400(Phenylalanine, tyrosine and tryptophan biosynthesis)	K01657	EC:4.1.3.27	PREDICTED: E3 ubiquitin-protein ligase CHFR-like isoform X1 [Pyrus x bretschneideri]	16.5448	61.9065	3.74174	1.90371	0.00686398	0.0860991
MD03G1072400	GO:0003955(NAD(P)H dehydrogenase (quinone) activity);GO:0005737(cytoplasm);GO:0005886(plasma membrane);GO:0010181(FMN binding);GO:0045892(negative regulation of transcription, DNA-templated);GO:0055114(oxidation-reduction process)	00130(Ubiquinone and other terpenoid-quinone biosynthesis)	K03809	EC:1.6.5.2	PREDICTED: probable NAD(P)H dehydrogenase (quinone) FQR1-like 3 [Pyrus x bretschneideri]	9.64731	44.6546	4.62871	2.21061	0.00178676	0.0322732
MD03G1076700	GO:0005215(transporter activity);GO:0005886(plasma membrane);GO:0006807(nitrogen compound metabolic process);GO:0006857(oligopeptide transport);GO:0009506(plasmodesma);GO:0015031(protein transport);GO:0016020(membrane);GO:0016021(integral component of membrane);GO:0042936(dipeptide transporter activity);GO:0042937(tripeptide transporter activity);GO:0042938(dipeptide transport);GO:0042939(tripept…	NA	NA	NA	PREDICTED: protein NRT1/ PTR FAMILY 8.2-like isoform X1 [Pyrus x bretschneideri]	16.8621	78.3539	4.64676	2.21623	0.00176821	0.0320648
MD03G1076900	GO:0005215(transporter activity);GO:0005886(plasma membrane);GO:0006807(nitrogen compound metabolic process);GO:0006857(oligopeptide transport);GO:0009506(plasmodesma);GO:0015031(protein transport);GO:0016020(membrane);GO:0016021(integral component of membrane);GO:0042936(dipeptide transporter activity);GO:0042937(tripeptide transporter activity);GO:0042938(dipeptide transport);GO:0042939(tripept…	NA	NA	NA	PREDICTED: protein NRT1/ PTR FAMILY 8.2-like [Malus domestica]	25.0806	87.9461	3.50654	1.81005	0.0102521	0.113263
MD03G1077700	GO:0005886(plasma membrane)	04626(Plant-pathogen interaction)	K13430	EC:2.7.11.1	PREDICTED: calmodulin-binding receptor-like cytoplasmic kinase 2 [Malus domestica]	2.15272	6.10941	2.83799	1.50487	0.0349328	0.249778
MD03G1080000	GO:0003924(GTPase activity);GO:0005200(structural constituent of cytoskeleton);GO:0005515(protein binding);GO:0005525(GTP binding);GO:0005737(cytoplasm);GO:0005794(Golgi apparatus);GO:0005874(microtubule);GO:0007017(microtubule-based process);GO:0009651(response to salt stress);GO:0016020(membrane);GO:0045298(tubulin complex)	04145(Phagosome)	K07375	NA	hypothetical protein PRUPE_ppa004884mg [Prunus persica]	64.1133	183.677	2.86489	1.51848	0.0309128	0.232451
MD03G1081200	GO:0003674(molecular_function);GO:0005739(mitochondrion);GO:0008150(biological_process)	NA	NA	NA	PREDICTED: uncharacterized protein LOC103419334 [Malus domestica]	2.07038	7.02407	3.39265	1.76241	0.0126285	0.130845
MD03G1084700	GO:0003924(GTPase activity);GO:0005525(GTP binding);GO:0005768(endosome);GO:0005794(Golgi apparatus);GO:0005886(plasma membrane);GO:0006886(intracellular protein transport);GO:0006913(nucleocytoplasmic transport);GO:0007264(small GTPase mediated signal transduction);GO:0009504(cell plate);GO:0010008(endosome membrane);GO:0042546(cell wall biogenesis)	04144(Endocytosis)	K07904	NA	hypothetical protein PRUPE_ppa011297mg [Prunus persica]	46.9077	129.882	2.76888	1.4693	0.0370365	0.258442
MD03G1088200	GO:0005576(extracellular region);GO:0008168(methyltransferase activity);GO:0016021(integral component of membrane);GO:0032259(methylation)	NA	NA	NA	PREDICTED: uncharacterized protein LOC103420651 [Malus domestica]	7.83691	18.7171	2.38833	1.256	0.0456621	0.290851
MD03G1089700	GO:0003700(transcription factor activity, sequence-specific DNA binding);GO:0005634(nucleus);GO:0006355(regulation of transcription, DNA-templated);GO:0043565(sequence-specific DNA binding)	04075(Plant hormone signal transduction)	K14494	NA	PREDICTED: scarecrow-like protein 33 [Malus domestica]	1.93841	8.80195	4.54081	2.18295	0.00211064	0.0366439
MD03G1092700	GO:0000122(negative regulation of transcription from RNA polymerase II promoter);GO:0005634(nucleus);GO:0006346(methylation-dependent chromatin silencing);GO:0008327(methyl-CpG binding)	NA	NA	NA	PREDICTED: methyl-CpG-binding domain-containing protein 5 [Malus domestica]	6.68431	19.8098	2.96362	1.56736	0.0266804	0.211473
MD03G1097000	GO:0000786(nucleosome);GO:0003677(DNA binding);GO:0005634(nucleus);GO:0006334(nucleosome assembly);GO:0006352(DNA-templated transcription, initiation);GO:0046982(protein heterodimerization activity)	NA	NA	NA	PREDICTED: histone H4 [Malus domestica]	34.4263	109.411	3.17812	1.66817	0.0179605	0.163237
MD03G1102100	GO:0005737(cytoplasm);GO:0030001(metal ion transport);GO:0046914(transition metal ion binding);GO:0046916(cellular transition metal ion homeostasis)	03013(RNA transport)	K14292	EC:2.1.1.-	PREDICTED: uncharacterized protein LOC103418817 [Malus domestica]	1.16461	3.81536	3.27608	1.71197	0.0180583	0.163865
MD03G1114300	GO:0004565(beta-galactosidase activity);GO:0005618(cell wall);GO:0005773(vacuole)	00052(Galactose metabolism);00600(Sphingolipid metabolism);00531(Glycosaminoglycan degradation);00604(Glycosphingolipid biosynthesis - ganglio series);00511(Other glycan degradation)	K12309	EC:3.2.1.23	PREDICTED: beta-galactosidase 8-like [Malus domestica]	0.330873	2.5939	7.83958	2.97078	6.2768e-05	0.00262185
MD03G1118400	GO:0003725(double-stranded RNA binding);GO:0005515(protein binding);GO:0005634(nucleus);GO:0005737(cytoplasm);GO:0035196(production of miRNAs involved in gene silencing by miRNA);GO:0070919(production of siRNA involved in chromatin silencing by small RNA)	NA	NA	NA	PREDICTED: double-stranded RNA-binding protein 2 [Pyrus x bretschneideri]	5.57742	16.1313	2.89225	1.53219	0.0299838	0.22741
MD03G1119500	GO:0003677(DNA binding);GO:0003700(transcription factor activity, sequence-specific DNA binding);GO:0005634(nucleus);GO:0006351(transcription, DNA-templated);GO:0006355(regulation of transcription, DNA-templated);GO:0007389(pattern specification process);GO:0009734(auxin-activated signaling pathway);GO:0009738(abscisic acid-activated signaling pathway);GO:0009743(response to carbohydrate);GO:0010…	NA	NA	NA	PREDICTED: auxin response factor 18-like isoform X2 [Malus domestica]	1.61489	4.53462	2.80801	1.48955	0.0402139	0.270462
MD03G1122300	GO:0003676(nucleic acid binding);GO:0003700(transcription factor activity, sequence-specific DNA binding);GO:0005634(nucleus);GO:0006351(transcription, DNA-templated);GO:0006979(response to oxidative stress);GO:0008270(zinc ion binding);GO:0009409(response to cold);GO:0009414(response to water deprivation);GO:0009611(response to wounding);GO:0009644(response to high light intensity);GO:0009651(re…	NA	NA	NA	PREDICTED: zinc finger protein ZAT10-like [Malus domestica]	3.12256	9.01069	2.88568	1.52891	0.0350255	0.25029
MD03G1137700	GO:0005634(nucleus)	NA	NA	NA	PREDICTED: uncharacterized protein LOC103419769 [Malus domestica]	31.1549	123.276	3.95688	1.98436	0.0048279	0.0661002
MD03G1139600	GO:0003735(structural constituent of ribosome);GO:0006412(translation);GO:0022627(cytosolic small ribosomal subunit)	03010(Ribosome)	K02961	NA	PREDICTED: 30S ribosomal protein S17-like [Malus domestica]	6.68966	21.2998	3.18398	1.67083	0.0183825	0.166148
MD03G1142000	GO:0005634(nucleus);GO:0008168(methyltransferase activity);GO:0032259(methylation)	NA	NA	NA	PREDICTED: uncharacterized protein LOC103415893 [Malus domestica]	4.31022	12.4614	2.89114	1.53164	0.0303418	0.229516
MD03G1142100	NA	NA	NA	NA	PREDICTED: pentatricopeptide repeat-containing protein At5g14770, mitochondrial-like [Malus domestica]	0.767771	2.21206	2.88115	1.52664	0.0326189	0.239993
MD03G1143200	GO:0003713(transcription coactivator activity);GO:0005634(nucleus);GO:0006366(transcription from RNA polymerase II promoter)	NA	NA	NA	PREDICTED: protein ecdysoneless homolog [Malus domestica]	3.21733	8.80835	2.73778	1.45301	0.0400571	0.269804
MD03G1143900	GO:0000470(maturation of LSU-rRNA);GO:0003723(RNA binding);GO:0006412(translation);GO:0022625(cytosolic large ribosomal subunit)	03010(Ribosome)	K02865	NA	PREDICTED: 60S ribosomal protein L10a [Malus domestica]	36.7505	124.194	3.3794	1.75677	0.0124878	0.1298
MD03G1144400	GO:0004553(hydrolase activity, hydrolyzing O-glycosyl compounds);GO:0030247(polysaccharide binding);GO:0046658(anchored component of plasma membrane)	00500(Starch and sucrose metabolism)	K19892	EC:3.2.1.39	PREDICTED: glucan endo-1,3-beta-glucosidase 14-like isoform X1 [Malus domestica]	2.09184	37.1087	17.7398	4.14891	4.40932e-08	7.52447e-06
MD03G1145900	GO:0005215(transporter activity);GO:0005737(cytoplasm);GO:0006886(intracellular protein transport);GO:0006888(ER to Golgi vesicle-mediated transport);GO:0008270(zinc ion binding);GO:0016192(vesicle-mediated transport);GO:0030127(COPII vesicle coat)	04141(Protein processing in endoplasmic reticulum)	K14007	NA	PREDICTED: protein transport protein sec24-like [Pyrus x bretschneideri]	16.5414	44.5821	2.69518	1.43038	0.0424499	0.277863
MD03G1148500	GO:0003677(DNA binding);GO:0003700(transcription factor activity, sequence-specific DNA binding);GO:0005634(nucleus);GO:0006351(transcription, DNA-templated);GO:0006355(regulation of transcription, DNA-templated);GO:0007275(multicellular organism development)	03013(RNA transport);03015(mRNA surveillance pathway);03018(RNA degradation)	K13126	NA	PREDICTED: NAC domain-containing protein 90 [Pyrus x bretschneideri]	1.23598	3.80945	3.08212	1.62392	0.0253835	0.205768
MD03G1168700	GO:0004760(serine-pyruvate transaminase activity);GO:0005777(peroxisome);GO:0005886(plasma membrane);GO:0008453(alanine-glyoxylate transaminase activity);GO:0009507(chloroplast);GO:0009570(chloroplast stroma);GO:0009853(photorespiration);GO:0016020(membrane);GO:0048046(apoplast);GO:0050281(serine-glyoxylate transaminase activity)	01200(Carbon metabolism);00630(Glyoxylate and dicarboxylate metabolism);00250(Alanine, aspartate and glutamate metabolism);00260(Glycine, serine and threonine metabolism);04146(Peroxisome)	K00830	EC:2.6.1.44;EC:2.6.1.45	PREDICTED: serine--glyoxylate aminotransferase [Malus domestica]	28.4127	78.3312	2.75691	1.46305	0.037849	0.261557
MD03G1170300	GO:0003723(RNA binding);GO:0005634(nucleus);GO:0005829(cytosol);GO:0008150(biological_process)	NA	NA	NA	PREDICTED: THUMP domain-containing protein 1-like [Malus domestica]	8.58328	23.3274	2.71777	1.44242	0.0411269	0.273153
MD03G1173700	GO:0003674(molecular_function);GO:0009507(chloroplast);GO:0009535(chloroplast thylakoid membrane);GO:0009543(chloroplast thylakoid lumen);GO:0009611(response to wounding);GO:0010193(response to ozone);GO:0010224(response to UV-B);GO:0030095(chloroplast photosystem II)	NA	NA	NA	PREDICTED: photosystem II 5 kDa protein, chloroplastic-like [Malus domestica]	42.2426	175.763	4.16081	2.05687	0.00358636	0.0534263
MD03G1180400	GO:0005887(integral component of plasma membrane);GO:0043231(intracellular membrane-bounded organelle);GO:0043682(copper-transporting ATPase activity)	NA	NA	NA	PREDICTED: probable copper-transporting ATPase HMA5 [Pyrus x bretschneideri]	1.11895	3.05445	2.72975	1.44877	0.0452627	0.289112
MD03G1185100	GO:0005385(zinc ion transmembrane transporter activity);GO:0016020(membrane);GO:0071577(zinc II ion transmembrane transport)	NA	NA	NA	PREDICTED: zinc transporter 11-like [Pyrus x bretschneideri]	4.2491	15.0133	3.5333	1.82101	0.00999796	0.111306
MD03G1193200	GO:0000226(microtubule cytoskeleton organization);GO:0000911(cytokinesis by cell plate formation);GO:0000922(spindle pole);GO:0005634(nucleus);GO:0005819(spindle);GO:0005874(microtubule);GO:0007067(mitotic nuclear division);GO:0008017(microtubule binding);GO:0008283(cell proliferation);GO:0009524(phragmoplast);GO:0009574(preprophase band);GO:0048528(post-embryonic root development);GO:0055028(cor…	00190(Oxidative phosphorylation)	K02133	EC:3.6.3.14	PREDICTED: 65-kDa microtubule-associated protein 1 [Malus domestica]	6.80667	37.7379	5.54426	2.471	0.000513768	0.012882
MD03G1193600	GO:0004843(thiol-dependent ubiquitin-specific protease activity);GO:0005634(nucleus);GO:0005829(cytosol);GO:0006511(ubiquitin-dependent protein catabolic process);GO:0016579(protein deubiquitination);GO:0036459(thiol-dependent ubiquitinyl hydrolase activity)	NA	NA	NA	PREDICTED: MATH domain and coiled-coil domain-containing protein At3g58370-like [Malus domestica]	2.92039	7.70538	2.63848	1.3997	0.0498695	0.30479
MD03G1199500	GO:0000139(Golgi membrane);GO:0005794(Golgi apparatus);GO:0006486(protein glycosylation);GO:0008378(galactosyltransferase activity);GO:0016021(integral component of membrane);GO:0016757(transferase activity, transferring glycosyl groups);GO:0016758(transferase activity, transferring hexosyl groups)	NA	NA	NA	PREDICTED: probable beta-1,3-galactosyltransferase 2 isoform X1 [Pyrus x bretschneideri]	3.29714	9.83925	2.98418	1.57733	0.0260882	0.20916
MD03G1199600	GO:0003674(molecular_function);GO:0005634(nucleus);GO:0008150(biological_process)	NA	NA	NA	PREDICTED: nucleolin-like [Malus domestica]	4.20605	15.1706	3.60684	1.85073	0.00938899	0.107028
MD03G1200400	GO:0003743(translation initiation factor activity);GO:0006413(translational initiation)	03013(RNA transport)	K03113	NA	PREDICTED: protein translation factor SUI1 homolog [Malus domestica]	3.37813	9.34882	2.76746	1.46856	0.0418495	0.275925
MD03G1201300	GO:0000902(cell morphogenesis)	NA	NA	NA	PREDICTED: uncharacterized protein LOC103422923 [Malus domestica]	0.938305	4.57349	4.87421	2.28517	0.00146549	0.028232
MD03G1202100	GO:0010494(cytoplasmic stress granule);GO:0010603(regulation of cytoplasmic mRNA processing body assembly);GO:0034063(stress granule assembly);GO:0044822(poly(A) RNA binding)	NA	NA	NA	PREDICTED: uncharacterized protein LOC103428837 isoform X1 [Malus domestica]	5.27562	14.4369	2.73652	1.45234	0.0398895	0.269072
MD03G1202200	GO:0005634(nucleus);GO:0008143(poly(A) binding)	03013(RNA transport)	K03231	NA	PREDICTED: polyadenylate-binding protein RBP45C-like [Pyrus x bretschneideri]	135.23	545.18	4.03151	2.01132	0.0042824	0.0604479
MD03G1202600	NA	NA	NA	NA	-	25.1394	198.503	7.89609	2.98114	3.66879e-05	0.00175879
MD03G1205300	GO:0005737(cytoplasm);GO:0031625(ubiquitin protein ligase binding);GO:0061630(ubiquitin protein ligase activity)	NA	NA	NA	PREDICTED: fatty acid desaturase 4, chloroplastic-like [Malus domestica]	1.30972	13.2333	10.1039	3.33685	7.3166e-06	0.000475308
MD03G1210300	GO:0003743(translation initiation factor activity);GO:0005737(cytoplasm);GO:0006413(translational initiation);GO:0006417(regulation of translation)	03013(RNA transport)	K03113	NA	PREDICTED: protein translation factor SUI1 homolog 2 [Malus domestica]	139.931	454.246	3.24622	1.69876	0.0156473	0.150188
MD03G1214400	GO:0005515(protein binding)	04626(Plant-pathogen interaction)	K13430	EC:2.7.11.1	PREDICTED: calcium/calmodulin-regulated receptor-like kinase 1 [Malus domestica]	4.56375	12.4496	2.72794	1.44781	0.0409588	0.272824
MD03G1218100	GO:0000785(chromatin);GO:0000791(euchromatin);GO:0000795(synaptonemal complex);GO:0004519(endonuclease activity);GO:0004722(protein serine/threonine phosphatase activity);GO:0005515(protein binding);GO:0005634(nucleus);GO:0006302(double-strand break repair);GO:0008408(3'-5' exonuclease activity);GO:0030145(manganese ion binding);GO:0030870(Mre11 complex);GO:0051321(meiotic cell cycle)	03440(Homologous recombination);03450(Non-homologous end-joining)	K10865	NA	PREDICTED: double-strand break repair protein MRE11 isoform X1 [Malus domestica]	0.405768	1.59936	3.94157	1.97877	0.00700395	0.0872414
MD03G1218900	GO:0009416(response to light stimulus);GO:0009535(chloroplast thylakoid membrane);GO:0009768(photosynthesis, light harvesting in photosystem I);GO:0009941(chloroplast envelope);GO:0010287(plastoglobule);GO:0016168(chlorophyll binding);GO:0031409(pigment binding)	00196(Photosynthesis - antenna proteins)	K08914	NA	PREDICTED: chlorophyll a-b binding protein 13, chloroplastic [Malus domestica]	3.81759	27.5509	7.21681	2.85136	7.94961e-05	0.00313801
MD03G1220100	GO:0010044(response to aluminum ion)	NA	NA	NA	PREDICTED: uncharacterized protein YnbB-like isoform X1 [Malus domestica]	0.923851	2.89515	3.13378	1.6479	0.0226793	0.191439
MD03G1221300	GO:0004672(protein kinase activity);GO:0004674(protein serine/threonine kinase activity);GO:0005524(ATP binding);GO:0005576(extracellular region);GO:0005886(plasma membrane);GO:0009506(plasmodesma);GO:0009741(response to brassinosteroid);GO:0009742(brassinosteroid mediated signaling pathway);GO:0009791(post-embryonic development);GO:0009826(unidimensional cell growth);GO:0016021(integral componen…	04626(Plant-pathogen interaction)	K13430	EC:2.7.11.1	PREDICTED: receptor-like protein kinase THESEUS 1 [Pyrus x bretschneideri]	0.458392	2.29104	4.998	2.32135	0.00141454	0.0275522
MD03G1223400	GO:0005634(nucleus);GO:0005794(Golgi apparatus);GO:0005886(plasma membrane);GO:0009416(response to light stimulus);GO:0009718(anthocyanin-containing compound biosynthetic process);GO:0015995(chlorophyll biosynthetic process);GO:0045893(positive regulation of transcription, DNA-templated)	NA	NA	NA	PREDICTED: uncharacterized protein LOC103430353 isoform X2 [Malus domestica]	3.20583	25.0578	7.81631	2.96649	3.91266e-05	0.00184984
MD03G1225000	GO:0004497(monooxygenase activity)	00905(Brassinosteroid biosynthesis)	K15639	EC:1.14.-.-	PREDICTED: cytochrome P450 CYP72A219-like [Malus domestica]	4.38333	15.5975	3.55837	1.83122	0.00955796	0.108145
MD03G1225500	GO:0005634(nucleus);GO:0005802(trans-Golgi network);GO:0005886(plasma membrane);GO:0009506(plasmodesma);GO:0009524(phragmoplast);GO:0010051(xylem and phloem pattern formation);GO:0010088(phloem development);GO:0015220(choline transmembrane transporter activity);GO:0015871(choline transport);GO:0016021(integral component of membrane);GO:0048364(root development);GO:0090603(sieve element differenti…	NA	NA	NA	PREDICTED: choline transporter-like protein 2 [Malus domestica]	1.33173	3.86496	2.9022	1.53715	0.0312164	0.233615
MD03G1225800	GO:0003674(molecular_function);GO:0005634(nucleus);GO:0008150(biological_process)	NA	NA	NA	PREDICTED: vicilin-like seed storage protein At2g18540 isoform X1 [Pyrus x bretschneideri]	14.3434	46.4894	3.24118	1.69652	0.0159288	0.151134
MD03G1227400	GO:0005758(mitochondrial intermembrane space);GO:0006825(copper ion transport);GO:0016531(copper chaperone activity)	00190(Oxidative phosphorylation)	K02260	NA	PREDICTED: cytochrome c oxidase copper chaperone 2 [Pyrus x bretschneideri]	8.7576	37.825	4.31911	2.11073	0.00293792	0.0465883
MD03G1227600	GO:0005758(mitochondrial intermembrane space);GO:0006825(copper ion transport);GO:0016531(copper chaperone activity)	00190(Oxidative phosphorylation)	K02260	NA	PREDICTED: cytochrome c oxidase copper chaperone 2 [Pyrus x bretschneideri]	4.12905	14.5581	3.52576	1.81794	0.0117683	0.12515
MD03G1229000	GO:0005515(protein binding);GO:0005634(nucleus);GO:0006952(defense response);GO:0043433(negative regulation of sequence-specific DNA binding transcription factor activity);GO:0051245(negative regulation of cellular defense response)	NA	NA	NA	PREDICTED: VQ motif-containing protein 4-like [Malus domestica]	1.34298	3.92278	2.92094	1.54643	0.034808	0.249444
MD03G1231600	GO:0005634(nucleus);GO:0008150(biological_process);GO:0046872(metal ion binding)	NA	NA	NA	PREDICTED: protein yippee-like At5g53940 [Malus domestica]	3.00719	9.2613	3.07972	1.6228	0.0235323	0.196679
MD03G1233100	GO:0004674(protein serine/threonine kinase activity);GO:0005524(ATP binding);GO:0005886(plasma membrane);GO:0006468(protein phosphorylation);GO:0016021(integral component of membrane);GO:0016301(kinase activity);GO:0030246(carbohydrate binding)	00500(Starch and sucrose metabolism)	K01176	EC:3.2.1.1	PREDICTED: L-type lectin-domain containing receptor kinase IX.1-like [Malus domestica]	0.714253	3.13157	4.3844	2.13238	0.00313115	0.0484967
MD03G1233600	GO:0004674(protein serine/threonine kinase activity);GO:0005524(ATP binding);GO:0005886(plasma membrane);GO:0006468(protein phosphorylation);GO:0016021(integral component of membrane);GO:0016301(kinase activity);GO:0030246(carbohydrate binding)	00500(Starch and sucrose metabolism)	K01176	EC:3.2.1.1	PREDICTED: L-type lectin-domain containing receptor kinase IX.1-like [Malus domestica]	0.477025	2.16249	4.53328	2.18056	0.00283289	0.0453005
MD03G1240900	GO:0004674(protein serine/threonine kinase activity);GO:0005886(plasma membrane)	04626(Plant-pathogen interaction)	K18873	NA	PREDICTED: putative serine/threonine-protein kinase [Malus domestica]	2.38427	7.10492	2.97992	1.57527	0.0264166	0.21028
MD03G1251500	GO:0051213(dioxygenase activity)	00941(Flavonoid biosynthesis)	K05278	EC:1.14.11.23	PREDICTED: protein SRG1-like, partial [Malus domestica]	2.31225	11.0565	4.78171	2.25753	0.00159285	0.02988
MD03G1257200	GO:0005634(nucleus);GO:0008150(biological_process);GO:0009536(plastid)	NA	NA	NA	PREDICTED: uncharacterized protein LOC103427374 [Malus domestica]	3.00358	10.3079	3.43186	1.77899	0.0130047	0.133593
MD03G1262000	GO:0003674(molecular_function);GO:0005634(nucleus)	NA	NA	NA	PREDICTED: protein MARD1 isoform X1 [Malus domestica]	10.6648	52.4888	4.92171	2.29916	0.00117826	0.0241212
MD03G1269800	GO:0003674(molecular_function);GO:0005739(mitochondrion);GO:0008150(biological_process)	00970(Aminoacyl-tRNA biosynthesis)	K01890	EC:6.1.1.20	PREDICTED: LOW QUALITY PROTEIN: uncharacterized protein LOC103432453 [Malus domestica]	20.0261	69.4016	3.46555	1.79308	0.0108047	0.117485
MD03G1272500	GO:0005351(sugar:proton symporter activity);GO:0005355(glucose transmembrane transporter activity);GO:0005887(integral component of plasma membrane);GO:0035428(hexose transmembrane transport);GO:0046323(glucose import)	NA	NA	NA	PREDICTED: sugar transporter ERD6-like 7 [Prunus mume]	21.3647	90.6295	4.24203	2.08475	0.00311444	0.0484248
MD03G1274200	GO:0000166(nucleotide binding);GO:0005634(nucleus);GO:0005730(nucleolus);GO:0006364(rRNA processing);GO:0007049(cell cycle);GO:0009553(embryo sac development);GO:0009561(megagametogenesis);GO:0051301(cell division);GO:0080008(Cul4-RING E3 ubiquitin ligase complex)	03008(Ribosome biogenesis in eukaryotes)	K14549	NA	PREDICTED: LOW QUALITY PROTEIN: protein SLOW WALKER 1 [Malus domestica]	5.33373	14.486	2.71593	1.44145	0.0419604	0.276038
MD03G1280000	GO:0004620(phospholipase activity);GO:0004806(triglyceride lipase activity);GO:0005576(extracellular region);GO:0005615(extracellular space);GO:0016042(lipid catabolic process);GO:0016787(hydrolase activity);GO:0047714(galactolipase activity)	00100(Steroid biosynthesis)	K01052	EC:3.1.1.13	PREDICTED: putative disease resistance protein RGA1 [Malus domestica]	0.562848	2.75958	4.90288	2.29363	0.0015981	0.0299294
MD03G1280200	GO:0005515(protein binding);GO:0005524(ATP binding);GO:0005576(extracellular region);GO:0006952(defense response);GO:0043531(ADP binding)	03040(Spliceosome)	K12818	EC:3.6.4.13	PREDICTED: disease resistance protein RGA2-like [Malus domestica]	0.960877	5.12423	5.33286	2.41491	0.000738501	0.0170307
MD03G1282200	GO:0005886(plasma membrane);GO:0006952(defense response)	NA	NA	NA	PREDICTED: MLO-like protein 1 [Malus domestica]	3.95949	15.0629	3.80424	1.92761	0.00639953	0.0818904
MD03G1291900	GO:0003677(DNA binding);GO:0003700(transcription factor activity, sequence-specific DNA binding);GO:0005515(protein binding);GO:0005634(nucleus);GO:0005737(cytoplasm);GO:0005886(plasma membrane);GO:0006351(transcription, DNA-templated);GO:0006355(regulation of transcription, DNA-templated);GO:0008219(cell death);GO:0009723(response to ethylene);GO:0009735(response to cytokinin);GO:0009753(respons…	04626(Plant-pathogen interaction)	K13434	NA	ethylene-responsive transcription factor ERF073-like [Malus domestica]	5.35776	80.0285	14.9369	3.90081	1.86698e-07	2.46776e-05
MD03G1292400	GO:0004650(polygalacturonase activity);GO:0005576(extracellular region);GO:0005773(vacuole);GO:0005975(carbohydrate metabolic process);GO:0009505(plant-type cell wall);GO:0016829(lyase activity);GO:0071555(cell wall organization)	00040(Pentose and glucuronate interconversions);00500(Starch and sucrose metabolism)	K01213	EC:3.2.1.67	PREDICTED: probable polygalacturonase isoform X2 [Malus domestica]	2.23524	10.6241	4.75302	2.24884	0.00158831	0.0298439
MD03G1295700	GO:0000179(rRNA (adenine-N6,N6-)-dimethyltransferase activity);GO:0005737(cytoplasm)	NA	NA	NA	PREDICTED: ribosomal RNA small subunit methyltransferase-like [Malus domestica]	3.18711	8.9446	2.80649	1.48877	0.0361644	0.255159
MD03G1298800	GO:0003674(molecular_function);GO:0005634(nucleus);GO:0008150(biological_process)	NA	NA	NA	PREDICTED: uncharacterized protein LOC103432650 isoform X1 [Malus domestica]	40.9629	119.06	2.90653	1.5393	0.0287279	0.222629
MD04G1008300	GO:0003677(DNA binding);GO:0003700(transcription factor activity, sequence-specific DNA binding);GO:0005634(nucleus);GO:0006351(transcription, DNA-templated);GO:0006355(regulation of transcription, DNA-templated)	03013(RNA transport)	K14317	NA	myb family transcription factor APL [Malus domestica]	7.68395	38.381	4.99495	2.32047	0.00107287	0.0223844
MD04G1008500	GO:0005509(calcium ion binding)	04626(Plant-pathogen interaction)	K13448	NA	PREDICTED: probable calcium-binding protein CML22 isoform X1 [Malus domestica]	1.00791	3.31798	3.29194	1.71894	0.0187459	0.168236
MD04G1016600	GO:0005515(protein binding);GO:0005634(nucleus);GO:0006457(protein folding);GO:0009507(chloroplast);GO:0010322(regulation of isopentenyl diphosphate biosynthetic process, methylerythritol 4-phosphate pathway);GO:0061077(chaperone-mediated protein folding);GO:1902395(regulation of 1-deoxy-D-xylulose-5-phosphate synthase activity)	04141(Protein processing in endoplasmic reticulum)	K09517	NA	PREDICTED: chaperone protein dnaJ 20, chloroplastic-like [Malus domestica]	36.8437	100.363	2.72404	1.44575	0.0402099	0.270462
MD04G1018100	GO:0004871(signal transducer activity);GO:0009506(plasmodesma);GO:0019722(calcium-mediated signaling)	NA	NA	NA	PREDICTED: protein RALF-like 32 [Pyrus x bretschneideri]	5.48505	18.6942	3.40821	1.76902	0.0143505	0.142737
MD04G1019100	GO:0004672(protein kinase activity);GO:0004674(protein serine/threonine kinase activity);GO:0005524(ATP binding);GO:0005576(extracellular region);GO:0005794(Golgi apparatus);GO:0005829(cytosol);GO:0005886(plasma membrane);GO:0006468(protein phosphorylation);GO:0009506(plasmodesma);GO:0016021(integral component of membrane)	04626(Plant-pathogen interaction)	K13429	NA	PREDICTED: receptor-like kinase TMK4 [Malus domestica]	3.81032	10.1951	2.67567	1.4199	0.0445495	0.286075
MD04G1025300	GO:0003674(molecular_function);GO:0005737(cytoplasm);GO:0008150(biological_process)	00240(Pyrimidine metabolism)	K16904	EC:3.6.1.12	PREDICTED: dCTP pyrophosphatase 1-like [Malus domestica]	2.09818	7.19475	3.42905	1.77781	0.0134542	0.136675
MD04G1025400	GO:0001164(RNA polymerase I CORE element sequence-specific DNA binding);GO:0001187(transcription factor activity, RNA polymerase I CORE element binding transcription factor recruiting);GO:0005668(RNA polymerase transcription factor SL1 complex);GO:0070860(RNA polymerase I core factor complex)	NA	NA	NA	PREDICTED: TATA box-binding protein-associated factor RNA polymerase I subunit B [Malus domestica]	1.74061	4.65079	2.67192	1.41788	0.0466377	0.294522
MD04G1029400	GO:0004568(chitinase activity);GO:0005576(extracellular region);GO:0005794(Golgi apparatus);GO:0006032(chitin catabolic process);GO:0009408(response to heat);GO:0009414(response to water deprivation);GO:0009651(response to salt stress);GO:0009735(response to cytokinin);GO:0009809(lignin biosynthetic process);GO:0009825(multidimensional cell growth);GO:0009873(ethylene-activated signaling pathway)…	00520(Amino sugar and nucleotide sugar metabolism)	K01183	EC:3.2.1.14	PREDICTED: chitinase-like protein 1 [Malus domestica]	17.6574	62.1914	3.5221	1.81644	0.0099234	0.110695
MD04G1030000	GO:0004568(chitinase activity);GO:0005576(extracellular region);GO:0005794(Golgi apparatus);GO:0006032(chitin catabolic process);GO:0009408(response to heat);GO:0009414(response to water deprivation);GO:0009651(response to salt stress);GO:0009735(response to cytokinin);GO:0009809(lignin biosynthetic process);GO:0009825(multidimensional cell growth);GO:0009873(ethylene-activated signaling pathway)…	00520(Amino sugar and nucleotide sugar metabolism)	K01183	EC:3.2.1.14	PREDICTED: chitinase-like protein 1 [Malus domestica]	7.61577	23.6667	3.10759	1.6358	0.0206419	0.179295
MD04G1030300	GO:0004568(chitinase activity);GO:0005576(extracellular region);GO:0005794(Golgi apparatus);GO:0006032(chitin catabolic process);GO:0009408(response to heat);GO:0009414(response to water deprivation);GO:0009651(response to salt stress);GO:0009735(response to cytokinin);GO:0009809(lignin biosynthetic process);GO:0009825(multidimensional cell growth);GO:0009873(ethylene-activated signaling pathway)…	00520(Amino sugar and nucleotide sugar metabolism)	K01183	EC:3.2.1.14	PREDICTED: chitinase-like protein 1 [Malus domestica]	77.3191	285.623	3.69408	1.88522	0.00735051	0.0906114
MD04G1031300	NA	NA	NA	NA	hypothetical protein PRUPE_ppb015435mg, partial [Prunus persica]	1.21509	6.86084	5.64636	2.49732	0.000592735	0.0144039
MD04G1031400	NA	NA	NA	NA	PREDICTED: extensin-2-like isoform X1 [Pyrus x bretschneideri]	2.80686	11.8139	4.20893	2.07345	0.00348144	0.0523406
MD04G1031500	NA	NA	NA	NA	PREDICTED: extensin-2-like isoform X1 [Pyrus x bretschneideri]	2.39519	9.40733	3.92759	1.97365	0.0056346	0.0745207
MD04G1033200	GO:0003924(GTPase activity);GO:0005525(GTP binding);GO:0005794(Golgi apparatus);GO:0005829(cytosol);GO:0005886(plasma membrane);GO:0006886(intracellular protein transport);GO:0006913(nucleocytoplasmic transport);GO:0007264(small GTPase mediated signal transduction)	04144(Endocytosis)	K07904	NA	PREDICTED: ras-related protein RABA5e [Malus domestica]	15.2033	127.287	8.37234	3.06563	2.24987e-05	0.00118
MD04G1033300	GO:0005515(protein binding);GO:0005516(calmodulin binding);GO:0005634(nucleus);GO:0005886(plasma membrane);GO:0030414(peptidase inhibitor activity);GO:0042742(defense response to bacterium)	NA	NA	NA	PREDICTED: pirin-like protein [Malus domestica]	3.84618	92.38	24.0186	4.58608	2.55792e-09	6.96332e-07
MD04G1035000	GO:0005524(ATP binding);GO:0005634(nucleus);GO:0006952(defense response);GO:0007165(signal transduction);GO:0043531(ADP binding)	03040(Spliceosome);04141(Protein processing in endoplasmic reticulum);04144(Endocytosis)	K03283	NA	PREDICTED: putative disease resistance protein At4g11170 isoform X1 [Malus domestica]	1.12255	4.38319	3.90467	1.9652	0.0067169	0.0846993
MD04G1035200	GO:0006952(defense response);GO:0007165(signal transduction);GO:0043531(ADP binding)	03040(Spliceosome);04141(Protein processing in endoplasmic reticulum);04144(Endocytosis)	K03283	NA	PREDICTED: TMV resistance protein N-like isoform X1 [Pyrus x bretschneideri]	1.30222	3.88232	2.9813	1.57594	0.0276482	0.21637
MD04G1038300	GO:0000245(spliceosomal complex assembly);GO:0000380(alternative mRNA splicing, via spliceosome);GO:0000387(spliceosomal snRNP assembly);GO:0003674(molecular_function);GO:0005634(nucleus);GO:0005681(spliceosomal complex);GO:0070417(cellular response to cold)	03013(RNA transport)	K13130	NA	PREDICTED: uncharacterized protein LOC103435448 [Malus domestica]	1.61192	4.65465	2.88765	1.52989	0.0333581	0.243007
MD04G1038400	NA	03013(RNA transport)	K13130	NA	PREDICTED: uncharacterized protein LOC103435448 [Malus domestica]	3.69142	10.5214	2.85022	1.51107	0.03294	0.241355
MD04G1038500	GO:0004715(non-membrane spanning protein tyrosine kinase activity);GO:0005524(ATP binding);GO:0005634(nucleus);GO:0005886(plasma membrane);GO:0016301(kinase activity);GO:0019901(protein kinase binding)	04626(Plant-pathogen interaction)	K13436	EC:2.7.11.1	PREDICTED: PTI1-like tyrosine-protein kinase 1 isoform X1 [Malus domestica]	43.3372	225.394	5.20095	2.37877	0.000790937	0.0177491
MD04G1040300	GO:0009507(chloroplast);GO:0010019(chloroplast-nucleus signaling pathway);GO:0015995(chlorophyll biosynthetic process);GO:0019899(enzyme binding);GO:0031969(chloroplast membrane);GO:0043085(positive regulation of catalytic activity);GO:0046906(tetrapyrrole binding)	NA	NA	NA	PREDICTED: tetrapyrrole-binding protein, chloroplastic [Malus domestica]	4.92414	17.7611	3.60694	1.85078	0.00927468	0.106095
MD04G1042500	GO:0003674(molecular_function);GO:0005739(mitochondrion);GO:0008150(biological_process)	03010(Ribosome)	K02987	NA	PREDICTED: uncharacterized protein LOC103322359 isoform X1 [Prunus mume]	6.82533	30.1626	4.41921	2.14379	0.0024951	0.0411655
MD04G1042700	GO:0000989(transcription factor activity, transcription factor binding);GO:0005634(nucleus);GO:0006355(regulation of transcription, DNA-templated);GO:0009640(photomorphogenesis)	NA	NA	NA	COL domain class transcription factor [Malus domestica]	9.05153	31.7087	3.50314	1.80865	0.0102948	0.113505
MD04G1043700	GO:0003677(DNA binding);GO:0003700(transcription factor activity, sequence-specific DNA binding);GO:0005634(nucleus);GO:0006351(transcription, DNA-templated);GO:0006355(regulation of transcription, DNA-templated);GO:0007275(multicellular organism development)	03018(RNA degradation)	K12581	NA	uncharacterized LOC103400464 [Malus domestica]	24.7396	64.7543	2.61744	1.38815	0.0490061	0.301648
MD04G1048000	GO:0000272(polysaccharide catabolic process);GO:0004568(chitinase activity);GO:0005576(extracellular region);GO:0005618(cell wall);GO:0006032(chitin catabolic process);GO:0006952(defense response);GO:0008061(chitin binding);GO:0009611(response to wounding);GO:0009617(response to bacterium);GO:0009626(plant-type hypersensitive response);GO:0010262(somatic embryogenesis);GO:0016998(cell wall macrom…	00520(Amino sugar and nucleotide sugar metabolism)	K01183	EC:3.2.1.14	PREDICTED: endochitinase EP3-like [Malus domestica]	5.10586	34.4199	6.74125	2.75302	0.000131209	0.00465173
MD04G1058000	GO:0001944(vasculature development);GO:0003677(DNA binding);GO:0003700(transcription factor activity, sequence-specific DNA binding);GO:0005634(nucleus);GO:0005643(nuclear pore);GO:0006351(transcription, DNA-templated);GO:0006355(regulation of transcription, DNA-templated);GO:0006952(defense response);GO:0009873(ethylene-activated signaling pathway);GO:0010200(response to chitin);GO:0045893(posit…	04075(Plant hormone signal transduction)	K14517	NA	PREDICTED: ethylene-responsive transcription factor 2-like [Malus domestica]	1.73016	11.6508	6.73398	2.75146	0.000158527	0.00534668
MD04G1058500	GO:0005829(cytosol);GO:0009611(response to wounding);GO:0016787(hydrolase activity);GO:0046872(metal ion binding)	NA	NA	NA	PREDICTED: nudix hydrolase 8 [Pyrus x bretschneideri]	2.15265	15.9724	7.41988	2.8914	6.44272e-05	0.00265332
MD04G1082300	GO:0004197(cysteine-type endopeptidase activity);GO:0006624(vacuolar protein processing);GO:0051603(proteolysis involved in cellular protein catabolic process)	NA	NA	NA	PREDICTED: legumain [Malus domestica]	1.4059	57.5736	40.9513	5.35584	2.02746e-11	1.03027e-08
MD04G1083800	GO:0003677(DNA binding);GO:0003700(transcription factor activity, sequence-specific DNA binding);GO:0005515(protein binding);GO:0005634(nucleus);GO:0009909(regulation of flower development);GO:0009933(meristem structural organization);GO:0009944(polarity specification of adaxial/abaxial axis);GO:0010093(specification of floral organ identity);GO:0010154(fruit development);GO:0010158(abaxial cell …	NA	NA	NA	PREDICTED: axial regulator YABBY 1-like isoform X1 [Malus domestica]	3.78765	16.6597	4.39844	2.13699	0.00266949	0.0433125
MD04G1083900	GO:0005507(copper ion binding);GO:0009505(plant-type cell wall);GO:0009506(plasmodesma);GO:0016722(oxidoreductase activity, oxidizing metal ions);GO:0046658(anchored component of plasma membrane)	00053(Ascorbate and aldarate metabolism)	K00423	EC:1.10.3.3	PREDICTED: monocopper oxidase-like protein SKU5 [Malus domestica]	0.546536	4.67448	8.55293	3.09642	2.78214e-05	0.00141376
MD04G1087300	GO:0006869(lipid transport);GO:0008289(lipid binding)	03010(Ribosome)	K02883	NA	PREDICTED: 14 kDa proline-rich protein DC2.15-like [Malus domestica]	4.53622	58.0931	12.8065	3.6788	8.16063e-07	8.52097e-05
MD04G1096200	GO:0005515(protein binding);GO:0005737(cytoplasm);GO:0006559(L-phenylalanine catabolic process);GO:0006952(defense response);GO:0006979(response to oxidative stress);GO:0009555(pollen development);GO:0009611(response to wounding);GO:0009699(phenylpropanoid biosynthetic process);GO:0009800(cinnamic acid biosynthetic process);GO:0009819(drought recovery);GO:0010224(response to UV-B);GO:0045548(phen…	00360(Phenylalanine metabolism);00940(Phenylpropanoid biosynthesis)	K10775	EC:4.3.1.24	PREDICTED: phenylalanine ammonia-lyase 1-like [Malus domestica]	1.34808	10.3523	7.67934	2.94098	4.99092e-05	0.0022364
MD04G1099800	GO:0005634(nucleus);GO:0008270(zinc ion binding);GO:0016021(integral component of membrane)	NA	NA	NA	PREDICTED: uncharacterized protein LOC103433283 [Malus domestica]	1.75777	7.76286	4.41632	2.14284	0.00267069	0.0433125
MD04G1100100	GO:0005783(endoplasmic reticulum);GO:0005788(endoplasmic reticulum lumen);GO:0005886(plasma membrane);GO:0006457(protein folding);GO:0016032(viral process);GO:0044794(positive regulation by host of viral process)	04141(Protein processing in endoplasmic reticulum)	K09523	NA	PREDICTED: dnaJ protein P58IPK homolog [Malus domestica]	3.45782	9.66174	2.79417	1.48242	0.0367352	0.257518
MD04G1103000	GO:0004004(ATP-dependent RNA helicase activity);GO:0006364(rRNA processing);GO:0010501(RNA secondary structure unwinding)	03040(Spliceosome)	K12835	EC:3.6.4.13	PREDICTED: DEAD-box ATP-dependent RNA helicase 57-like [Malus domestica]	1.60259	5.86956	3.66254	1.87285	0.00866987	0.101394
MD04G1104500	GO:0000724(double-strand break repair via homologous recombination);GO:0003677(DNA binding);GO:0004386(helicase activity);GO:0005524(ATP binding);GO:0005634(nucleus);GO:0006260(DNA replication);GO:0006270(DNA replication initiation);GO:0007140(male meiosis);GO:0007143(female meiotic division);GO:0008094(DNA-dependent ATPase activity);GO:0009555(pollen development);GO:0046872(metal ion binding)	03030(DNA replication)	K02212	EC:3.6.4.12	PREDICTED: probable DNA helicase MCM8 [Malus domestica]	0.997257	7.01277	7.03206	2.81395	9.59049e-05	0.00361891
MD04G1105200	GO:0003677(DNA binding);GO:0003700(transcription factor activity, sequence-specific DNA binding);GO:0005634(nucleus);GO:0006351(transcription, DNA-templated);GO:0006355(regulation of transcription, DNA-templated);GO:0009908(flower development);GO:0010073(meristem maintenance);GO:0010093(specification of floral organ identity);GO:0019953(sexual reproduction);GO:0030154(cell differentiation);GO:004…	04075(Plant hormone signal transduction)	K14516	NA	PREDICTED: floral homeotic protein APETALA 2-like isoform X1 [Malus domestica]	0.706214	2.65724	3.76265	1.91175	0.00940562	0.107111
MD04G1112600	GO:0004674(protein serine/threonine kinase activity);GO:0005524(ATP binding);GO:0005886(plasma membrane);GO:0006468(protein phosphorylation);GO:0009742(brassinosteroid mediated signaling pathway);GO:0016301(kinase activity);GO:1900459(positive regulation of brassinosteroid mediated signaling pathway)	04626(Plant-pathogen interaction)	K13430	EC:2.7.11.1	PREDICTED: serine/threonine-protein kinase CDL1-like isoform X2 [Malus domestica]	1.43843	10.9349	7.60199	2.92638	5.76929e-05	0.00247517
MD04G1113200	GO:0000156(phosphorelay response regulator activity);GO:0000160(phosphorelay signal transduction system);GO:0003677(DNA binding);GO:0005634(nucleus);GO:0005739(mitochondrion);GO:0006351(transcription, DNA-templated);GO:0006355(regulation of transcription, DNA-templated);GO:0007623(circadian rhythm);GO:0009266(response to temperature stimulus);GO:0010017(red or far-red light signaling pathway);GO:…	04712(Circadian rhythm - plant)	K12129	NA	PREDICTED: two-component response regulator-like APRR7 isoform X1 [Pyrus x bretschneideri]	1.94531	6.867	3.53003	1.81968	0.0100838	0.111899
MD04G1113300	GO:0004017(adenylate kinase activity);GO:0005524(ATP binding);GO:0005634(nucleus);GO:0005737(cytoplasm);GO:0005739(mitochondrion);GO:0008652(cellular amino acid biosynthetic process);GO:0009507(chloroplast);GO:0009570(chloroplast stroma);GO:0019201(nucleotide kinase activity);GO:0048364(root development);GO:0048367(shoot system development)	00230(Purine metabolism)	K00939	EC:2.7.4.3	PREDICTED: adenylate kinase 1, chloroplastic-like [Malus domestica]	12.1533	37.6819	3.10055	1.63252	0.020494	0.178325
MD04G1124800	GO:0000786(nucleosome);GO:0003677(DNA binding);GO:0005634(nucleus);GO:0006334(nucleosome assembly);GO:0006352(DNA-templated transcription, initiation);GO:0046982(protein heterodimerization activity)	NA	NA	NA	PREDICTED: histone H4 [Malus domestica]	6.66402	18.4415	2.76732	1.46849	0.0415878	0.274887
MD04G1125300	GO:0005886(plasma membrane);GO:0006810(transport);GO:0016021(integral component of membrane)	NA	NA	NA	PREDICTED: uncharacterized protein LOC103419345 [Malus domestica]	0.685145	2.0225	2.95192	1.56166	0.0314771	0.234687
MD04G1127400	GO:0005200(structural constituent of cytoskeleton);GO:0005524(ATP binding);GO:0005618(cell wall);GO:0005737(cytoplasm);GO:0005829(cytosol);GO:0005856(cytoskeleton);GO:0005886(plasma membrane);GO:0007010(cytoskeleton organization);GO:0009506(plasmodesma);GO:0048589(developmental growth);GO:0048767(root hair elongation)	04145(Phagosome)	K05692	NA	PREDICTED: LOW QUALITY PROTEIN: actin-like [Malus domestica]	15.3809	41.8765	2.72264	1.44501	0.0405252	0.271171
MD04G1129500	GO:0000793(condensed chromosome);GO:0003677(DNA binding);GO:0003700(transcription factor activity, sequence-specific DNA binding);GO:0005515(protein binding);GO:0005634(nucleus);GO:0005730(nucleolus);GO:0006351(transcription, DNA-templated);GO:0008356(asymmetric cell division);GO:0009615(response to virus);GO:0009651(response to salt stress);GO:0009733(response to auxin);GO:0009739(response to gi…	NA	NA	NA	PREDICTED: transcription factor AS1 [Malus domestica]	1.56045	9.31004	5.96627	2.57683	0.000346767	0.00967078
MD04G1130100	NA	NA	NA	NA	-	1.14547	5.05706	4.41485	2.14236	0.00317301	0.0489572
MD04G1135900	GO:0003674(molecular_function);GO:0005739(mitochondrion);GO:0008150(biological_process)	NA	NA	NA	hypothetical protein PRUPE_ppa024811mg [Prunus persica]	6.08403	28.9045	4.75088	2.24819	0.00190376	0.0337467
MD04G1138900	NA	NA	NA	NA	hypothetical protein PRUPE_ppa014227mg [Prunus persica]	2.74012	20.2755	7.39948	2.88742	7.81399e-05	0.00310213
MD04G1143700	GO:0003924(GTPase activity);GO:0005200(structural constituent of cytoskeleton);GO:0005515(protein binding);GO:0005525(GTP binding);GO:0005737(cytoplasm);GO:0005794(Golgi apparatus);GO:0005874(microtubule);GO:0007017(microtubule-based process);GO:0009651(response to salt stress);GO:0016020(membrane);GO:0045298(tubulin complex)	04145(Phagosome)	K07375	NA	PREDICTED: tubulin beta chain [Malus domestica]	4.64959	12.4455	2.67668	1.42045	0.0442987	0.284945
MD04G1144500	GO:0005737(cytoplasm)	00561(Glycerolipid metabolism);00564(Glycerophospholipid metabolism)	K13506	EC:2.3.1.15	PREDICTED: uncharacterized protein At1g04910-like [Malus domestica]	0.7632	3.25555	4.26566	2.09277	0.00347314	0.052315
MD04G1150400	GO:0004674(protein serine/threonine kinase activity);GO:0005524(ATP binding);GO:0005886(plasma membrane);GO:0006468(protein phosphorylation);GO:0007169(transmembrane receptor protein tyrosine kinase signaling pathway);GO:0009507(chloroplast);GO:0016021(integral component of membrane);GO:0016301(kinase activity)	04626(Plant-pathogen interaction)	K13428	EC:2.7.11.1	PREDICTED: probable LRR receptor-like serine/threonine-protein kinase At3g47570 [Malus domestica]	0.815626	2.51825	3.08751	1.62644	0.0228286	0.192131
MD04G1151500	GO:0003735(structural constituent of ribosome);GO:0006412(translation)	NA	NA	NA	PREDICTED: probable envelope ADP,ATP carrier protein, chloroplastic isoform X1 [Malus domestica]	0.872012	2.9299	3.35993	1.74843	0.0160979	0.151798
MD04G1153300	GO:0005515(protein binding);GO:0005737(cytoplasm);GO:0005829(cytosol);GO:0005886(plasma membrane);GO:0006520(cellular amino acid metabolic process);GO:0006979(response to oxidative stress);GO:0006982(response to lipid hydroperoxide);GO:0008615(pyridoxine biosynthetic process);GO:0009651(response to salt stress);GO:0010224(response to UV-B);GO:0010335(response to non-ionic osmotic stress);GO:00125…	00750(Vitamin B6 metabolism)	K06215	EC:4.3.3.6	PREDICTED: pyridoxal 5'-phosphate synthase subunit PDX1.3 [Malus domestica]	47.4712	126.553	2.6659	1.41462	0.0447588	0.286855
MD04G1155700	GO:0000062(fatty-acyl-CoA binding);GO:0003995(acyl-CoA dehydrogenase activity);GO:0005777(peroxisome);GO:0009055(electron carrier activity);GO:0033539(fatty acid beta-oxidation using acyl-CoA dehydrogenase);GO:0050660(flavin adenine dinucleotide binding);GO:0052890(oxidoreductase activity, acting on the CH-CH group of donors, with a flavin as acceptor);GO:0055088(lipid homeostasis)	01212(Fatty acid metabolism);00071(Fatty acid degradation);00592(alpha-Linolenic acid metabolism);01040(Biosynthesis of unsaturated fatty acids);04146(Peroxisome)	K00232	EC:1.3.3.6	PREDICTED: acyl-coenzyme A oxidase 4, peroxisomal-like [Malus domestica]	2.25032	14.451	6.42176	2.68297	0.000193601	0.00619171
MD04G1160100	GO:0000287(magnesium ion binding);GO:0004737(pyruvate decarboxylase activity);GO:0005575(cellular_component);GO:0030976(thiamine pyrophosphate binding)	00010(Glycolysis / Gluconeogenesis)	K01568	EC:4.1.1.1	PREDICTED: pyruvate decarboxylase 2-like [Malus domestica]	8.98982	452.857	50.3744	5.65462	2.126e-12	1.80057e-09
MD04G1165100	GO:0005794(Golgi apparatus);GO:0016413(O-acetyltransferase activity);GO:0071554(cell wall organization or biogenesis)	NA	NA	NA	PREDICTED: protein trichome birefringence-like 35 [Malus domestica]	2.13917	6.14657	2.87334	1.52273	0.0328197	0.24106
MD04G1171600	GO:0004674(protein serine/threonine kinase activity);GO:0005524(ATP binding);GO:0005886(plasma membrane);GO:0006468(protein phosphorylation);GO:0007165(signal transduction);GO:0016301(kinase activity);GO:0016310(phosphorylation)	04075(Plant hormone signal transduction)	K14498	EC:2.7.11.1	PREDICTED: CBL-interacting protein kinase 2-like [Pyrus x bretschneideri]	9.46731	29.5167	3.11775	1.6405	0.0198605	0.174716
MD04G1173700	NA	NA	NA	NA	PREDICTED: uncharacterized protein LOC103942111 [Pyrus x bretschneideri]	11.309	30.7729	2.72109	1.44419	0.0405564	0.271171
MD04G1176100	GO:0004674(protein serine/threonine kinase activity);GO:0005634(nucleus);GO:0005737(cytoplasm);GO:0035556(intracellular signal transduction)	04140(Regulation of autophagy)	K08269	EC:2.7.11.1	PREDICTED: serine/threonine-protein kinase AtPK2/AtPK19-like [Malus domestica]	6.16987	17.3513	2.81226	1.49173	0.0346167	0.249081
MD04G1178900	GO:0005509(calcium ion binding)	04626(Plant-pathogen interaction)	K13448	NA	PREDICTED: calcium-binding protein CML42-like [Pyrus x bretschneideri]	4.42991	39.8806	9.00257	3.17034	1.52372e-05	0.000853993
MD04G1180400	GO:0004674(protein serine/threonine kinase activity);GO:0005524(ATP binding);GO:0005886(plasma membrane);GO:0006468(protein phosphorylation);GO:0016301(kinase activity)	04626(Plant-pathogen interaction)	K13430	EC:2.7.11.1	PREDICTED: serine/threonine-protein kinase At5g01020-like [Malus domestica]	2.00023	11.0551	5.52689	2.46647	0.000563121	0.0138312
MD04G1184900	GO:0001944(vasculature development);GO:0003677(DNA binding);GO:0003700(transcription factor activity, sequence-specific DNA binding);GO:0005634(nucleus);GO:0006355(regulation of transcription, DNA-templated);GO:0009733(response to auxin);GO:0010089(xylem development);GO:0010119(regulation of stomatal movement);GO:0010214(seed coat development);GO:0048364(root development)	00190(Oxidative phosphorylation);00860(Porphyrin and chlorophyll metabolism)	K02259	NA	MYB domain class transcription factor [Malus domestica]	0.830837	4.75619	5.72458	2.51717	0.000527955	0.0131083
MD04G1191000	GO:0000272(polysaccharide catabolic process);GO:0003723(RNA binding);GO:0003824(catalytic activity);GO:0005515(protein binding);GO:0005773(vacuole);GO:0005777(peroxisome);GO:0005794(Golgi apparatus);GO:0005840(ribosome);GO:0005996(monosaccharide metabolic process);GO:0006364(rRNA processing);GO:0007623(circadian rhythm);GO:0009409(response to cold);GO:0009506(plasmodesma);GO:0009507(chloroplast);…	NA	NA	NA	PREDICTED: chloroplast stem-loop binding protein of 41 kDa b, chloroplastic [Malus domestica]	4.08167	13.0451	3.19602	1.67628	0.0179232	0.163027
MD04G1194600	GO:0005524(ATP binding);GO:0005634(nucleus);GO:0005773(vacuole);GO:0006950(response to stress)	NA	NA	NA	PREDICTED: universal stress protein A-like protein isoform X2 [Malus domestica]	47.7383	218.788	4.58307	2.19631	0.00187697	0.0334846
MD04G1197000	GO:0005515(protein binding);GO:0005634(nucleus);GO:0006351(transcription, DNA-templated);GO:0006355(regulation of transcription, DNA-templated);GO:0010072(primary shoot apical meristem specification)	03008(Ribosome biogenesis in eukaryotes)	K14558	NA	PREDICTED: topless-related protein 3-like isoform X1 [Malus domestica]	11.6195	44.6953	3.84658	1.94358	0.00577082	0.0758971
MD04G1200300	GO:0003779(actin binding);GO:0005634(nucleus);GO:0005737(cytoplasm);GO:0007015(actin filament organization);GO:0008290(F-actin capping protein complex);GO:0030036(actin cytoskeleton organization);GO:0051016(barbed-end actin filament capping);GO:0051693(actin filament capping)	04144(Endocytosis)	K10364	NA	PREDICTED: F-actin-capping protein subunit alpha [Malus domestica]	12.1374	49.3553	4.06638	2.02374	0.00412329	0.05891
MD04G1202100	NA	NA	NA	NA	-	1.44446	6.65466	4.60703	2.20384	0.00238349	0.0399426
MD04G1203800	GO:0005634(nucleus);GO:0005739(mitochondrion);GO:0008270(zinc ion binding);GO:0009793(embryo development ending in seed dormancy);GO:0048046(apoplast)	NA	NA	NA	PREDICTED: LOW QUALITY PROTEIN: uncharacterized protein LOC103419441 [Malus domestica]	1.61799	4.74405	2.93207	1.55192	0.0288867	0.22316
MD04G1204200	GO:0016165(linoleate 13S-lipoxygenase activity)	00591(Linoleic acid metabolism)	K15718	EC:1.13.11.58	probable linoleate 9S-lipoxygenase 5 [Malus domestica]	0.91774	3.29646	3.59193	1.84476	0.0097098	0.109283
MD04G1206500	NA	NA	NA	NA	PREDICTED: uncharacterized protein LOC103434099 [Malus domestica]	6.29879	22.5066	3.57316	1.8372	0.00907421	0.104376
MD04G1208600	GO:0004842(ubiquitin-protein transferase activity);GO:0005576(extracellular region);GO:0005886(plasma membrane);GO:0008270(zinc ion binding);GO:0009814(defense response, incompatible interaction);GO:0009816(defense response to bacterium, incompatible interaction);GO:0010200(response to chitin);GO:0016021(integral component of membrane);GO:0016567(protein ubiquitination);GO:0016874(ligase activity)	03440(Homologous recombination)	K10875	EC:3.6.4.-	PREDICTED: E3 ubiquitin-protein ligase ATL6 [Malus domestica]	1.21268	3.47844	2.86839	1.52024	0.0366105	0.25688
MD04G1209400	GO:0003993(acid phosphatase activity);GO:0009507(chloroplast);GO:0009534(chloroplast thylakoid);GO:0009535(chloroplast thylakoid membrane);GO:0009543(chloroplast thylakoid lumen);GO:0009579(thylakoid);GO:0010206(photosystem II repair);GO:0016021(integral component of membrane);GO:0016311(dephosphorylation);GO:0031977(thylakoid lumen)	NA	NA	NA	PREDICTED: UPF0603 protein At1g54780, chloroplastic-like [Malus domestica]	9.67771	26.0831	2.69517	1.43038	0.0432798	0.281078
MD04G1209500	GO:0005509(calcium ion binding);GO:0009507(chloroplast);GO:0009654(photosystem II oxygen evolving complex);GO:0015979(photosynthesis);GO:0019898(extrinsic component of membrane)	NA	NA	NA	PREDICTED: uncharacterized protein LOC103928328 isoform X1 [Pyrus x bretschneideri]	0.912384	2.81424	3.0845	1.62503	0.0260367	0.209125
MD04G1211700	GO:0004674(protein serine/threonine kinase activity);GO:0005524(ATP binding);GO:0005634(nucleus);GO:0005737(cytoplasm);GO:0006468(protein phosphorylation);GO:0016301(kinase activity);GO:0051020(GTPase binding)	04626(Plant-pathogen interaction)	K13430	EC:2.7.11.1	PREDICTED: receptor-like cytosolic serine/threonine-protein kinase RBK2 [Malus domestica]	2.06664	9.27147	4.48626	2.16551	0.00236222	0.0397183
MD04G1213400	GO:0003674(molecular_function);GO:0005737(cytoplasm);GO:0008150(biological_process)	NA	NA	NA	PREDICTED: uncharacterized protein LOC108173228 [Malus domestica]	21.0801	80.8372	3.83477	1.93914	0.00586948	0.0767395
MD04G1216000	NA	NA	NA	NA	-	44.4227	139.888	3.14903	1.65491	0.0186131	0.167452
MD04G1216200	NA	NA	NA	NA	PREDICTED: basic proline-rich protein-like [Malus domestica]	5.04026	47.9447	9.51235	3.2498	8.77844e-06	0.000557601
MD04G1216300	NA	NA	NA	NA	PREDICTED: basic proline-rich protein-like isoform X1 [Pyrus x bretschneideri]	45.6675	216.232	4.73492	2.24334	0.00151243	0.0289655
MD04G1219000	GO:0004124(cysteine synthase activity);GO:0005737(cytoplasm);GO:0006535(cysteine biosynthetic process from serine);GO:0030170(pyridoxal phosphate binding)	01200(Carbon metabolism);01230(Biosynthesis of amino acids);00920(Sulfur metabolism);00270(Cysteine and methionine metabolism)	K01738	EC:2.5.1.47	PREDICTED: cysteine synthase-like [Malus domestica]	25.0094	99.797	3.99038	1.99653	0.00460279	0.0639441
MD04G1219300	GO:0000062(fatty-acyl-CoA binding);GO:0003995(acyl-CoA dehydrogenase activity);GO:0005777(peroxisome);GO:0009055(electron carrier activity);GO:0033539(fatty acid beta-oxidation using acyl-CoA dehydrogenase);GO:0050660(flavin adenine dinucleotide binding);GO:0052890(oxidoreductase activity, acting on the CH-CH group of donors, with a flavin as acceptor);GO:0055088(lipid homeostasis)	NA	NA	NA	PREDICTED: uncharacterized protein LOC103434144 [Malus domestica]	4.46868	14.7689	3.30498	1.72464	0.0156184	0.150165
MD04G1221900	GO:0001158(enhancer sequence-specific DNA binding);GO:0003700(transcription factor activity, sequence-specific DNA binding);GO:0005516(calmodulin binding);GO:0005634(nucleus);GO:0006351(transcription, DNA-templated);GO:0006355(regulation of transcription, DNA-templated);GO:0045893(positive regulation of transcription, DNA-templated)	NA	NA	NA	PREDICTED: trihelix transcription factor GTL2-like [Malus domestica]	4.21105	15.565	3.69624	1.88606	0.00760375	0.0928819
MD04G1224100	GO:0003824(catalytic activity);GO:0005737(cytoplasm);GO:0005829(cytosol);GO:0009225(nucleotide-sugar metabolic process);GO:0019853(L-ascorbic acid biosynthetic process);GO:0047918(GDP-mannose 3,5-epimerase activity);GO:0051287(NAD binding)	00053(Ascorbate and aldarate metabolism);00520(Amino sugar and nucleotide sugar metabolism)	K10046	EC:5.1.3.18;EC:5.1.3.-	PREDICTED: GDP-mannose 3,5-epimerase 2 [Malus domestica]	1.61565	13.3981	8.29274	3.05185	2.87825e-05	0.00144971
MD04G1224700	GO:0001046(core promoter sequence-specific DNA binding);GO:0001228(transcriptional activator activity, RNA polymerase II transcription regulatory region sequence-specific binding);GO:0005634(nucleus);GO:0006366(transcription from RNA polymerase II promoter)	04075(Plant hormone signal transduction);04712(Circadian rhythm - plant)	K12126	NA	PREDICTED: transcription factor UNE12-like isoform X2 [Malus domestica]	1.07419	7.99109	7.4392	2.89515	7.43837e-05	0.00299128
MD04G1230800	GO:0003674(molecular_function);GO:0005886(plasma membrane);GO:0008150(biological_process)	NA	NA	NA	PREDICTED: ankyrin repeat domain-containing protein 13B-like [Malus domestica]	12.6527	50.1522	3.96375	1.98686	0.00483025	0.0661002
MD04G1230900	GO:0003674(molecular_function);GO:0005886(plasma membrane);GO:0008150(biological_process)	NA	NA	NA	PREDICTED: ankyrin repeat domain-containing protein 13B-like [Malus domestica]	13.8156	48.3737	3.50137	1.80792	0.0102507	0.113263
MD04G1231000	GO:0006487(protein N-linked glycosylation);GO:0036071(N-glycan fucosylation)	NA	NA	NA	PREDICTED: uncharacterized protein LOC103434215 [Malus domestica]	3.27356	12.9944	3.9695	1.98896	0.00493398	0.0672781
MD04G1232700	GO:0003674(molecular_function);GO:0005739(mitochondrion);GO:0005829(cytosol);GO:0008150(biological_process);GO:0009507(chloroplast)	00730(Thiamine metabolism)	K03707	EC:3.5.99.2	PREDICTED: probable aminopyrimidine aminohydrolase, mitochondrial [Malus domestica]	1.78005	7.72374	4.33905	2.11738	0.00291127	0.0463593
MD04G1241800	NA	NA	NA	NA	PREDICTED: protein encore-like isoform X1 [Malus domestica]	5.00042	14.6848	2.93671	1.5542	0.0279012	0.217811
MD04G1244000	GO:0005576(extracellular region)	NA	NA	NA	PREDICTED: uncharacterized protein LOC103419526 [Malus domestica]	1.71266	9.40198	5.48968	2.45672	0.000732569	0.0169551
MD04G1245900	GO:0003674(molecular_function);GO:0008150(biological_process);GO:0009507(chloroplast);GO:0016021(integral component of membrane)	NA	NA	NA	PREDICTED: uncharacterized protein LOC103434278 [Malus domestica]	3.31747	24.6134	7.41932	2.89129	6.45142e-05	0.00265332
MD04G1247600	GO:0004607(phosphatidylcholine-sterol O-acyltransferase activity);GO:0005576(extracellular region);GO:0005783(endoplasmic reticulum);GO:0006629(lipid metabolic process);GO:0008374(O-acyltransferase activity);GO:0008970(phosphatidylcholine 1-acylhydrolase activity);GO:0016042(lipid catabolic process);GO:0031090(organelle membrane);GO:0052739(phosphatidylserine 1-acylhydrolase activity);GO:0052740(…	NA	NA	NA	PREDICTED: phospholipase A(1) LCAT3-like [Malus domestica]	1.88484	13.4922	7.15827	2.83961	8.93479e-05	0.00341088
MD05G1000500	GO:0009416(response to light stimulus);GO:0009535(chloroplast thylakoid membrane);GO:0009768(photosynthesis, light harvesting in photosystem I);GO:0009941(chloroplast envelope);GO:0010287(plastoglobule);GO:0016168(chlorophyll binding);GO:0031409(pigment binding)	00196(Photosynthesis - antenna proteins)	K08916	NA	PREDICTED: chlorophyll a-b binding protein CP26, chloroplastic-like [Malus domestica]	45.9624	176.71	3.84467	1.94286	0.00576452	0.0758879
MD05G1002900	GO:0005618(cell wall);GO:0005829(cytosol);GO:0005886(plasma membrane);GO:0006952(defense response);GO:0007165(signal transduction);GO:0009505(plant-type cell wall);GO:0009507(chloroplast);GO:0080167(response to karrikin)	NA	NA	NA	PREDICTED: polygalacturonase inhibitor 2-like [Malus domestica]	49.805	240.545	4.82973	2.27194	0.00131594	0.0263038
MD05G1003400	GO:0003674(molecular_function);GO:0005634(nucleus);GO:0008150(biological_process);GO:0016021(integral component of membrane)	NA	NA	NA	PREDICTED: uncharacterized protein LOC103425130 isoform X1 [Malus domestica]	41.55	136.598	3.28756	1.71702	0.0145981	0.144384
MD05G1006400	GO:0005634(nucleus);GO:0005886(plasma membrane);GO:0005986(sucrose biosynthetic process);GO:0016157(sucrose synthase activity);GO:0016757(transferase activity, transferring glycosyl groups);GO:0046524(sucrose-phosphate synthase activity)	00500(Starch and sucrose metabolism)	K00696	EC:2.4.1.14	PREDICTED: probable sucrose-phosphate synthase 4 [Malus domestica]	0.52672	1.65914	3.14995	1.65533	0.0221679	0.188584
MD05G1023900	GO:0005634(nucleus);GO:0005737(cytoplasm);GO:0005829(cytosol);GO:0005983(starch catabolic process);GO:0005986(sucrose biosynthetic process);GO:0006000(fructose metabolic process);GO:0009737(response to abscisic acid);GO:0009750(response to fructose);GO:0015979(photosynthesis);GO:0016311(dephosphorylation);GO:0030388(fructose 1,6-bisphosphate metabolic process);GO:0042132(fructose 1,6-bisphosphate…	01200(Carbon metabolism);00010(Glycolysis / Gluconeogenesis);00030(Pentose phosphate pathway);00051(Fructose and mannose metabolism);00710(Carbon fixation in photosynthetic organisms)	K03841	EC:3.1.3.11	PREDICTED: fructose-1,6-bisphosphatase, cytosolic isoform X1 [Malus domestica]	0.712708	4.33656	6.08462	2.60517	0.000379819	0.010352
MD05G1027000	GO:0003677(DNA binding);GO:0003700(transcription factor activity, sequence-specific DNA binding);GO:0005634(nucleus);GO:0006351(transcription, DNA-templated);GO:0006355(regulation of transcription, DNA-templated);GO:0009507(chloroplast);GO:0043565(sequence-specific DNA binding)	04075(Plant hormone signal transduction)	K14432	NA	PREDICTED: G-box-binding factor 4-like [Pyrus x bretschneideri]	7.21394	21.6454	3.0005	1.5852	0.0247153	0.20264
MD05G1027900	GO:0005634(nucleus);GO:0008168(methyltransferase activity);GO:0032259(methylation)	NA	NA	NA	PREDICTED: protein SET DOMAIN GROUP 41 [Pyrus x bretschneideri]	1.91947	5.34267	2.7834	1.47685	0.0380889	0.262484
MD05G1029400	GO:0005886(plasma membrane);GO:0008270(zinc ion binding);GO:0009833(plant-type primary cell wall biogenesis);GO:0016021(integral component of membrane);GO:0016757(transferase activity, transferring glycosyl groups);GO:0016759(cellulose synthase activity);GO:0016760(cellulose synthase (UDP-forming) activity);GO:0030244(cellulose biosynthetic process);GO:0071555(cell wall organization)	00500(Starch and sucrose metabolism);00520(Amino sugar and nucleotide sugar metabolism)	K00770	EC:2.4.2.24	PREDICTED: cellulose synthase A catalytic subunit 2 [UDP-forming]-like [Malus domestica]	15.6754	90.2873	5.75982	2.52602	0.000383526	0.0104282
MD05G1042900	GO:0003674(molecular_function);GO:0005615(extracellular space);GO:0005618(cell wall);GO:0005794(Golgi apparatus);GO:0005829(cytosol);GO:0008150(biological_process);GO:0009505(plant-type cell wall);GO:0009506(plasmodesma);GO:0009507(chloroplast);GO:0048046(apoplast)	NA	NA	NA	PREDICTED: protein EXORDIUM-like 2 [Malus domestica]	4.66178	20.2154	4.33641	2.1165	0.00295891	0.0467271
MD05G1049800	GO:0003677(DNA binding);GO:0003887(DNA-directed DNA polymerase activity);GO:0005634(nucleus);GO:0005829(cytosol);GO:0006260(DNA replication);GO:0006351(transcription, DNA-templated)	NA	NA	NA	PREDICTED: DNA polymerase V [Malus domestica]	2.45225	6.5232	2.66009	1.41147	0.0460626	0.292424
MD05G1050800	GO:0005524(ATP binding);GO:0005634(nucleus);GO:0006952(defense response);GO:0043531(ADP binding)	03040(Spliceosome)	K12818	EC:3.6.4.13	PREDICTED: disease resistance protein RGA2-like [Malus domestica]	1.382	4.5545	3.29558	1.72053	0.0154212	0.149106
MD05G1051700	GO:0003674(molecular_function);GO:0005886(plasma membrane);GO:0009409(response to cold);GO:0009507(chloroplast);GO:0009733(response to auxin)	04075(Plant hormone signal transduction)	K14488	NA	PREDICTED: auxin-induced protein 15A-like [Malus domestica]	8.83315	53.7992	6.0906	2.60658	0.000307031	0.00885356
MD05G1051800	GO:0003674(molecular_function);GO:0005886(plasma membrane);GO:0009409(response to cold);GO:0009507(chloroplast);GO:0009733(response to auxin)	04075(Plant hormone signal transduction)	K14488	NA	PREDICTED: auxin-induced protein 15A-like [Malus domestica]	8.18768	53.9382	6.58773	2.71978	0.000166308	0.00555989
MD05G1052000	GO:0003674(molecular_function);GO:0005886(plasma membrane);GO:0009409(response to cold);GO:0009507(chloroplast);GO:0009733(response to auxin)	04075(Plant hormone signal transduction)	K14488	NA	PREDICTED: auxin-induced protein 15A-like [Malus domestica]	11.674	76.2501	6.5316	2.70744	0.000169596	0.00562867
MD05G1052100	GO:0003674(molecular_function);GO:0005739(mitochondrion);GO:0009733(response to auxin)	04075(Plant hormone signal transduction)	K14488	NA	PREDICTED: auxin-induced protein 15A-like [Malus domestica]	27.735	89.3044	3.21992	1.68702	0.0168615	0.156418
MD05G1055500	GO:0009507(chloroplast);GO:0009536(plastid);GO:0009706(chloroplast inner membrane);GO:0009941(chloroplast envelope);GO:0010020(chloroplast fission);GO:0016491(oxidoreductase activity);GO:0042803(protein homodimerization activity);GO:0050662(coenzyme binding);GO:0055114(oxidation-reduction process)	NA	NA	NA	PREDICTED: epimerase family protein SDR39U1 homolog, chloroplastic-like [Pyrus x bretschneideri]	2.37277	7.45493	3.14187	1.65162	0.0204612	0.17831
MD05G1059300	GO:0003993(acid phosphatase activity);GO:0005615(extracellular space);GO:0030145(manganese ion binding);GO:0046872(metal ion binding)	NA	NA	NA	PREDICTED: purple acid phosphatase-like [Malus domestica]	30.2873	115.909	3.82698	1.93621	0.0059466	0.0775262
MD05G1065700	GO:0016021(integral component of membrane)	04626(Plant-pathogen interaction)	K13436	EC:2.7.11.1	PREDICTED: CBS domain-containing protein CBSCBSPB1-like isoform X2 [Malus domestica]	1.87987	7.59241	4.03879	2.01392	0.00542697	0.0724874
MD05G1070300	GO:0003674(molecular_function);GO:0005737(cytoplasm);GO:0008150(biological_process)	NA	NA	NA	PREDICTED: deSI-like protein At4g17486 [Pyrus x bretschneideri]	1.39413	5.39936	3.87292	1.95342	0.00670444	0.0846084
MD05G1071000	GO:0003674(molecular_function);GO:0005515(protein binding);GO:0005739(mitochondrion);GO:0009536(plastid);GO:0031359(integral component of chloroplast outer membrane);GO:0043572(plastid fission)	NA	NA	NA	PREDICTED: plastid division protein PDV2-like [Malus domestica]	14.6862	41.2584	2.80934	1.49023	0.0347625	0.249335
MD05G1072400	GO:0009496(plastoquinol--plastocyanin reductase activity);GO:0009507(chloroplast);GO:0009512(cytochrome b6f complex);GO:0009535(chloroplast thylakoid membrane);GO:0016021(integral component of membrane)	NA	NA	NA	PREDICTED: uncharacterized protein LOC103425794 [Malus domestica]	3.21441	16.0494	4.99297	2.3199	0.00140246	0.0274102
MD05G1075600	GO:0005516(calmodulin binding);GO:0005634(nucleus);GO:0005886(plasma membrane);GO:0008150(biological_process)	NA	NA	NA	PREDICTED: uncharacterized protein LOC103947764 [Pyrus x bretschneideri]	4.66869	17.9942	3.85423	1.94644	0.00637616	0.0817743
MD05G1076000	GO:0005634(nucleus);GO:0008143(poly(A) binding);GO:0010494(cytoplasmic stress granule);GO:0034605(cellular response to heat)	03013(RNA transport)	K03231	NA	PREDICTED: polyadenylate-binding protein RBP47-like [Pyrus x bretschneideri]	75.4193	214.549	2.84475	1.5083	0.0320519	0.237194
MD05G1084800	GO:0005737(cytoplasm);GO:0005886(plasma membrane)	NA	NA	NA	PREDICTED: filament-like plant protein 7 isoform X1 [Malus domestica]	1.45937	4.26812	2.92463	1.54825	0.0292187	0.224523
MD05G1087300	GO:0004693(cyclin-dependent protein serine/threonine kinase activity);GO:0005515(protein binding);GO:0005634(nucleus);GO:0007049(cell cycle);GO:0042127(regulation of cell proliferation);GO:0048316(seed development);GO:0051301(cell division);GO:0051726(regulation of cell cycle)	04075(Plant hormone signal transduction)	K14505	NA	PREDICTED: cyclin-D3-1 [Malus domestica]	14.0491	39.2519	2.79392	1.48229	0.0355235	0.252351
MD05G1088400	GO:0004617(phosphoglycerate dehydrogenase activity);GO:0009070(serine family amino acid biosynthetic process)	01200(Carbon metabolism);01230(Biosynthesis of amino acids);00260(Glycine, serine and threonine metabolism)	K00058	EC:1.1.1.95	PREDICTED: D-3-phosphoglycerate dehydrogenase 1, chloroplastic-like [Malus domestica]	33.0943	108.475	3.27777	1.71272	0.0148326	0.145694
MD05G1092300	GO:0005737(cytoplasm);GO:0009733(response to auxin);GO:0016874(ligase activity)	04075(Plant hormone signal transduction)	K14487	NA	PREDICTED: probable indole-3-acetic acid-amido synthetase GH3.1 [Malus domestica]	12.8368	34.2697	2.66964	1.41664	0.0446879	0.286562
MD05G1092900	GO:0005737(cytoplasm);GO:0009733(response to auxin);GO:0016874(ligase activity)	04075(Plant hormone signal transduction)	K14487	NA	PREDICTED: probable indole-3-acetic acid-amido synthetase GH3.1 [Malus domestica]	28.242	80.8733	2.86358	1.51782	0.0310374	0.233081
MD05G1099900	GO:0003674(molecular_function);GO:0005634(nucleus);GO:0008150(biological_process)	NA	NA	NA	PREDICTED: hepatoma-derived growth factor-related protein 2-like isoform X2 [Prunus mume]	7.78551	20.7418	2.66416	1.41368	0.0455097	0.290198
MD05G1100200	GO:0004674(protein serine/threonine kinase activity);GO:0005886(plasma membrane)	03040(Spliceosome);04141(Protein processing in endoplasmic reticulum);04144(Endocytosis)	K03283	NA	PREDICTED: TMV resistance protein N-like isoform X2 [Malus domestica]	9.07488	23.8249	2.62537	1.39252	0.0485225	0.300364
MD05G1103100	GO:0004185(serine-type carboxypeptidase activity);GO:0016747(transferase activity, transferring acyl groups other than amino-acyl groups);GO:0019748(secondary metabolic process);GO:0051603(proteolysis involved in cellular protein catabolic process)	00940(Phenylpropanoid biosynthesis)	K09756	EC:3.4.16.-;EC:2.3.1.91	PREDICTED: serine carboxypeptidase-like 1 isoform X2 [Pyrus x bretschneideri]	4.24032	24.1719	5.70048	2.51108	0.000440225	0.0115975
MD05G1109800	NA	NA	NA	NA	-	1.09112	13.6441	12.5046	3.64439	1.24975e-06	0.000118688
MD05G1112200	GO:0004506(squalene monooxygenase activity);GO:0005576(extracellular region);GO:0009611(response to wounding);GO:0009753(response to jasmonic acid);GO:0016021(integral component of membrane);GO:0016126(sterol biosynthetic process);GO:0050660(flavin adenine dinucleotide binding);GO:0055114(oxidation-reduction process)	00100(Steroid biosynthesis);00909(Sesquiterpenoid and triterpenoid biosynthesis)	K00511	EC:1.14.14.17	PREDICTED: squalene monooxygenase-like [Malus domestica]	1.06995	3.91391	3.65801	1.87106	0.00900081	0.103856
MD05G1112700	GO:0005737(cytoplasm);GO:0005777(peroxisome);GO:0006097(glyoxylate cycle);GO:0006099(tricarboxylic acid cycle);GO:0006108(malate metabolic process);GO:0009507(chloroplast);GO:0009514(glyoxysome);GO:0016615(malate dehydrogenase activity);GO:0030060(L-malate dehydrogenase activity);GO:0031998(regulation of fatty acid beta-oxidation);GO:0080093(regulation of photorespiration)	01200(Carbon metabolism);00020(Citrate cycle (TCA cycle));00620(Pyruvate metabolism);00630(Glyoxylate and dicarboxylate metabolism);00710(Carbon fixation in photosynthetic organisms);00270(Cysteine and methionine metabolism)	K00026	EC:1.1.1.37	PREDICTED: malate dehydrogenase, glyoxysomal [Malus domestica]	0.742552	4.23801	5.70735	2.51282	0.000594844	0.0144245
MD05G1113100	GO:0004033(aldo-keto reductase (NADP) activity);GO:0005737(cytoplasm);GO:0005829(cytosol);GO:0006012(galactose metabolic process);GO:0010349(L-galactose dehydrogenase activity);GO:0019853(L-ascorbic acid biosynthetic process);GO:0055114(oxidation-reduction process)	00053(Ascorbate and aldarate metabolism)	K17744	EC:1.1.1.316	L-galactose dehydrogenase [Malus domestica]	4.09542	13.1795	3.2181	1.68621	0.0171108	0.158154
MD05G1114400	GO:0005509(calcium ion binding);GO:0005634(nucleus)	NA	NA	NA	PREDICTED: uncharacterized protein LOC103414915 [Malus domestica]	8.06774	44.5117	5.51725	2.46395	0.00053301	0.0132075
MD05G1118500	NA	NA	NA	NA	PREDICTED: uncharacterized protein LOC103403603 [Malus domestica]	1.70953	8.10662	4.74202	2.2455	0.00189079	0.0335949
MD05G1122100	GO:0005829(cytosol);GO:0016618(hydroxypyruvate reductase activity);GO:0030267(glyoxylate reductase (NADP) activity)	01200(Carbon metabolism);00630(Glyoxylate and dicarboxylate metabolism);00260(Glycine, serine and threonine metabolism)	K15893	NA	PREDICTED: glycerate dehydrogenase [Malus domestica]	20.5421	163.978	7.98254	2.99685	3.25769e-05	0.00161077
MD05G1123700	GO:0004497(monooxygenase activity);GO:0044550(secondary metabolite biosynthetic process)	00906(Carotenoid biosynthesis)	K09838	EC:1.14.13.90	PREDICTED: uncharacterized protein LOC103946619 [Pyrus x bretschneideri]	6.63977	28.4166	4.27975	2.09753	0.00305396	0.0478321
MD05G1124700	GO:0005524(ATP binding);GO:0005773(vacuole);GO:0005774(vacuolar membrane);GO:0005794(Golgi apparatus);GO:0005829(cytosol);GO:0005886(plasma membrane);GO:0009507(chloroplast);GO:0015991(ATP hydrolysis coupled proton transport);GO:0016820(hydrolase activity, acting on acid anhydrides, catalyzing transmembrane movement of substances);GO:0030835(negative regulation of actin filament depolymerization)…	00190(Oxidative phosphorylation);04145(Phagosome)	K02147	NA	PREDICTED: V-type proton ATPase subunit B2 [Malus domestica]	14.0293	36.8993	2.63015	1.39514	0.048074	0.299213
MD05G1126600	GO:0005634(nucleus);GO:0006281(DNA repair);GO:0016301(kinase activity)	03015(mRNA surveillance pathway)	K08873	EC:2.7.11.1	PREDICTED: serine/threonine-protein kinase ATR [Pyrus x bretschneideri]	0.189192	1.12164	5.92859	2.56769	0.000411178	0.010997
MD05G1128800	GO:0005507(copper ion binding);GO:0009505(plant-type cell wall);GO:0009506(plasmodesma);GO:0016722(oxidoreductase activity, oxidizing metal ions)	00053(Ascorbate and aldarate metabolism)	K00423	EC:1.10.3.3	PREDICTED: L-ascorbate oxidase homolog [Malus domestica]	1.17574	14.957	12.7214	3.66918	8.70607e-07	8.92743e-05
MD05G1133000	GO:0004497(monooxygenase activity);GO:0055114(oxidation-reduction process)	00380(Tryptophan metabolism)	K11816	EC:1.14.13.168	PREDICTED: probable flavin-containing monooxygenase 1 [Pyrus x bretschneideri]	0.843117	3.0755	3.64777	1.86702	0.00992368	0.110695
MD05G1143500	GO:0004420(hydroxymethylglutaryl-CoA reductase (NADPH) activity);GO:0005778(peroxisomal membrane);GO:0005789(endoplasmic reticulum membrane);GO:0008299(isoprenoid biosynthetic process);GO:0016126(sterol biosynthetic process)	00900(Terpenoid backbone biosynthesis)	K00021	EC:1.1.1.34	3-hydroxy-3-methylglutaryl coenzyme A reductase [Pyrus communis]3-羟基-3-甲基戊二酰辅酶A还原酶，α-法尼烯生物代谢调控中的关键酶	382.428	2952.79	7.72118	2.94882	4.19169e-05	0.00195615
MD05G1145200	GO:0005515(protein binding)	03040(Spliceosome);04141(Protein processing in endoplasmic reticulum);04144(Endocytosis)	K03283	NA	PREDICTED: TMV resistance protein N-like [Pyrus x bretschneideri]	11.8002	43.2087	3.66168	1.87251	0.00779048	0.0944565
MD05G1149800	NA	NA	NA	NA	-	14.1273	55.413	3.92241	1.97174	0.0052579	0.0706003
MD05G1150400	NA	NA	NA	NA	-	5.18768	14.4211	2.77987	1.47502	0.0393436	0.267202
MD05G1158400	GO:0003674(molecular_function);GO:0005576(extracellular region);GO:0005773(vacuole);GO:0008150(biological_process)	NA	NA	NA	PREDICTED: uncharacterized protein LOC103433319 [Malus domestica]	0.906409	11.3941	12.5706	3.65198	1.19853e-06	0.000115155
MD05G1163800	GO:0003924(GTPase activity);GO:0005525(GTP binding);GO:0005622(intracellular);GO:0005886(plasma membrane);GO:0006886(intracellular protein transport);GO:0006913(nucleocytoplasmic transport);GO:0007264(small GTPase mediated signal transduction)	04144(Endocytosis)	K07904	NA	PREDICTED: ras-related protein RABA5b-like [Malus domestica]	3.40248	15.8308	4.65272	2.21807	0.00190813	0.0337786
MD05G1166200	GO:0003755(peptidyl-prolyl cis-trans isomerase activity);GO:0005528(FK506 binding);GO:0005789(endoplasmic reticulum membrane);GO:0061077(chaperone-mediated protein folding)	03030(DNA replication);03420(Nucleotide excision repair);03430(Mismatch repair);03440(Homologous recombination)	K07466	NA	PREDICTED: peptidyl-prolyl cis-trans isomerase FKBP62 [Malus domestica]	10.428	30.146	2.89086	1.5315	0.0297397	0.226693
MD05G1173700	GO:0005634(nucleus);GO:0016925(protein sumoylation);GO:0031386(protein tag)	03013(RNA transport)	K12160	NA	PREDICTED: small ubiquitin-related modifier 1-like [Malus domestica]	5.25183	14.4891	2.75888	1.46408	0.0407344	0.271963
MD05G1174700	GO:0003674(molecular_function);GO:0005634(nucleus);GO:0008150(biological_process);GO:0016021(integral component of membrane)	NA	NA	NA	PREDICTED: uncharacterized protein LOC103435834 [Malus domestica]	0.391197	1.12958	2.8875	1.52982	0.0364464	0.256516
MD05G1179100	GO:0003988(acetyl-CoA C-acyltransferase activity);GO:0005730(nucleolus);GO:0005739(mitochondrion);GO:0005774(vacuolar membrane);GO:0005777(peroxisome);GO:0005829(cytosol);GO:0006635(fatty acid beta-oxidation);GO:0009507(chloroplast);GO:0009514(glyoxysome);GO:0009611(response to wounding);GO:0009695(jasmonic acid biosynthetic process);GO:0009789(positive regulation of abscisic acid-activated signa…	01212(Fatty acid metabolism);00071(Fatty acid degradation);00592(alpha-Linolenic acid metabolism);01040(Biosynthesis of unsaturated fatty acids);00280(Valine, leucine and isoleucine degradation);04146(Peroxisome)	K07513	EC:2.3.1.16	PREDICTED: 3-ketoacyl-CoA thiolase 2, peroxisomal [Malus domestica]	93.1413	329.491	3.53754	1.82275	0.00951679	0.107893
MD05G1179800	GO:0001666(response to hypoxia);GO:0004022(alcohol dehydrogenase (NAD) activity);GO:0005737(cytoplasm);GO:0005794(Golgi apparatus);GO:0005829(cytosol);GO:0005886(plasma membrane);GO:0006970(response to osmotic stress);GO:0008270(zinc ion binding);GO:0009409(response to cold);GO:0009413(response to flooding);GO:0009414(response to water deprivation);GO:0009651(response to salt stress);GO:0009737(r…	00010(Glycolysis / Gluconeogenesis);00071(Fatty acid degradation);00592(alpha-Linolenic acid metabolism);00350(Tyrosine metabolism)	K18857	EC:1.1.1.1	PREDICTED: alcohol dehydrogenase-like [Malus domestica]	22.6575	145.199	6.40843	2.67997	0.000175704	0.00577525
MD05G1182800	GO:0005737(cytoplasm);GO:0005829(cytosol);GO:0005876(spindle microtubule);GO:0005886(plasma membrane);GO:0005938(cell cortex);GO:0007026(negative regulation of microtubule depolymerization);GO:0007067(mitotic nuclear division);GO:0009506(plasmodesma);GO:0009524(phragmoplast);GO:0016049(cell growth);GO:0043622(cortical microtubule organization);GO:0050821(protein stabilization);GO:0051010(microtub…	00230(Purine metabolism);00240(Pyrimidine metabolism);03020(RNA polymerase)	K03013	NA	PREDICTED: CLIP-associated protein-like isoform X1 [Malus domestica]	3.5416	11.5409	3.25866	1.70428	0.0155549	0.149709
MD05G1183600	GO:0003674(molecular_function);GO:0005634(nucleus);GO:0008150(biological_process)	NA	NA	NA	PREDICTED: uncharacterized protein LOC103435787 isoform X2 [Malus domestica]	0.648515	5.03161	7.75867	2.95581	4.91368e-05	0.00222497
MD05G1187600	GO:0000325(plant-type vacuole);GO:0005524(ATP binding);GO:0005773(vacuole);GO:0005774(vacuolar membrane);GO:0005886(plasma membrane);GO:0008281(sulfonylurea receptor activity);GO:0008559(xenobiotic-transporting ATPase activity);GO:0009651(response to salt stress);GO:0016021(integral component of membrane);GO:0030007(cellular potassium ion homeostasis);GO:0042626(ATPase activity, coupled to transm…	02010(ABC transporters)	K05665	NA	PREDICTED: ABC transporter C family member 5-like [Pyrus x bretschneideri]	10.4671	34.0303	3.25117	1.70096	0.0155487	0.149709
MD05G1187900	GO:0003824(catalytic activity);GO:0005768(endosome);GO:0005794(Golgi apparatus);GO:0005802(trans-Golgi network);GO:0009826(unidimensional cell growth);GO:0009863(salicylic acid mediated signaling pathway);GO:0009969(xyloglucan biosynthetic process);GO:0010256(endomembrane system organization);GO:0016020(membrane);GO:0016757(transferase activity, transferring glycosyl groups);GO:0030173(integral c…	NA	NA	NA	PREDICTED: xyloglucan galactosyltransferase MUR3-like [Malus domestica]	5.22923	14.4439	2.76215	1.46579	0.0380571	0.26244
MD05G1189100	NA	NA	NA	NA	PREDICTED: uncharacterized protein LOC103435761 [Malus domestica]	1.4538	8.23945	5.66754	2.50272	0.000533105	0.0132075
MD05G1190300	NA	NA	NA	NA	PREDICTED: retinoblastoma-related protein-like isoform X2 [Malus domestica]	5.05569	13.9445	2.75818	1.46372	0.0394076	0.26724
MD05G1196400	GO:0005622(intracellular);GO:0005634(nucleus);GO:0005795(Golgi stack);GO:0006886(intracellular protein transport);GO:0006891(intra-Golgi vesicle-mediated transport);GO:0008565(protein transporter activity);GO:0015031(protein transport)	NA	NA	NA	PREDICTED: TOM1-like protein 2 [Malus domestica]	39.9178	119.626	2.9968	1.58342	0.024345	0.201119
MD05G1204800	GO:0015095(magnesium ion transmembrane transporter activity);GO:0015693(magnesium ion transport)	NA	NA	NA	PREDICTED: magnesium transporter MRS2-I-like [Malus domestica]	2.27397	7.2218	3.17585	1.66714	0.0189194	0.169128
MD05G1205000	GO:0003674(molecular_function);GO:0009507(chloroplast);GO:0009523(photosystem II);GO:0009535(chloroplast thylakoid membrane);GO:0015979(photosynthesis);GO:0016021(integral component of membrane);GO:0042549(photosystem II stabilization)	00195(Photosynthesis)	K02721	NA	PREDICTED: photosystem II reaction center W protein, chloroplastic-like [Malus domestica]	6.89735	32.7204	4.74391	2.24608	0.00162201	0.0302557
MD05G1208000	GO:0003674(molecular_function);GO:0008150(biological_process);GO:0009507(chloroplast);GO:0016021(integral component of membrane)	NA	NA	NA	PREDICTED: uncharacterized endoplasmic reticulum membrane protein YGL010W-like [Pyrus x bretschneideri]	7.65772	20.2782	2.64808	1.40495	0.0486353	0.300376
MD05G1209300	GO:0005634(nucleus);GO:0005777(peroxisome);GO:0005829(cytosol);GO:0008891(glycolate oxidase activity);GO:0009506(plasmodesma);GO:0009507(chloroplast);GO:0009570(chloroplast stroma);GO:0009735(response to cytokinin);GO:0009854(oxidative photosynthetic carbon pathway);GO:0010181(FMN binding);GO:0016020(membrane);GO:0016491(oxidoreductase activity);GO:0022626(cytosolic ribosome);GO:0042742(defense r…	01200(Carbon metabolism);00630(Glyoxylate and dicarboxylate metabolism);04146(Peroxisome)	K11517	EC:1.1.3.15	PREDICTED: peroxisomal (S)-2-hydroxy-acid oxidase isoform X1 [Malus domestica]	4.80596	64.0492	13.327	3.73628	4.89972e-07	5.63025e-05
MD05G1210000	GO:0004364(glutathione transferase activity);GO:0005737(cytoplasm);GO:0006749(glutathione metabolic process);GO:0009407(toxin catabolic process)	00480(Glutathione metabolism)	K00799	EC:2.5.1.18	PREDICTED: probable glutathione S-transferase [Malus domestica]	20.0276	89.8246	4.48503	2.16512	0.00218106	0.037415
MD05G1210200	GO:0004364(glutathione transferase activity);GO:0005737(cytoplasm);GO:0006749(glutathione metabolic process);GO:0009407(toxin catabolic process)	00480(Glutathione metabolism)	K00799	EC:2.5.1.18	PREDICTED: probable glutathione S-transferase isoform X1 [Malus domestica]	2.7856	13.1436	4.71839	2.2383	0.00188006	0.0334846
MD05G1213100	GO:0007165(signal transduction);GO:0016020(membrane)	NA	NA	NA	PREDICTED: ankyrin repeat-containing protein At3g12360-like [Malus domestica]	2.90392	14.438	4.9719	2.3138	0.00119904	0.0244372
MD05G1213200	NA	NA	NA	NA	hypothetical protein PRUPE_ppa006495mg [Prunus persica]	0.756711	4.13861	5.4692	2.45133	0.000702414	0.0164559
MD05G1213400	GO:0007165(signal transduction);GO:0016020(membrane)	NA	NA	NA	PREDICTED: ankyrin repeat-containing protein At3g12360-like [Malus domestica]	2.80023	27.6757	9.88335	3.305	6.26299e-06	0.000413918
MD05G1223000	GO:0003992(N2-acetyl-L-ornithine:2-oxoglutarate 5-aminotransferase activity);GO:0005829(cytosol);GO:0006526(arginine biosynthetic process);GO:0009570(chloroplast stroma);GO:0030170(pyridoxal phosphate binding);GO:0042802(identical protein binding)	01210(2-Oxocarboxylic acid metabolism);01230(Biosynthesis of amino acids);00220(Arginine biosynthesis)	K00818	EC:2.6.1.11	PREDICTED: acetylornithine aminotransferase, mitochondrial-like [Malus domestica]	4.40289	12.9382	2.93857	1.55511	0.0291013	0.224241
MD05G1231700	GO:0004674(protein serine/threonine kinase activity);GO:0005886(plasma membrane);GO:0006468(protein phosphorylation);GO:0006952(defense response);GO:0009506(plasmodesma)	00520(Amino sugar and nucleotide sugar metabolism)	K01183	EC:3.2.1.14	PREDICTED: G-type lectin S-receptor-like serine/threonine-protein kinase At4g27290 isoform X1 [Malus domestica]	1.57118	7.71229	4.90861	2.29531	0.00128069	0.0257568
MD05G1233100	NA	NA	NA	NA	PREDICTED: NAC domain-containing protein 68-like [Malus domestica]	2.14476	5.9088	2.75499	1.46205	0.0434057	0.281441
MD05G1236300	GO:0005618(cell wall);GO:0006952(defense response);GO:0007165(signal transduction);GO:0050832(defense response to fungus)	04626(Plant-pathogen interaction)	K13466	NA	PREDICTED: leucine-rich repeat receptor-like serine/threonine-protein kinase At1g17230 [Pyrus x bretschneideri]	4.44064	20.889	4.70405	2.2339	0.00160516	0.0299879
MD05G1238600	GO:0009705(plant-type vacuole membrane);GO:0016021(integral component of membrane);GO:0022891(substrate-specific transmembrane transporter activity)	NA	NA	NA	PREDICTED: organic cation/carnitine transporter 2-like [Malus domestica]	0.81851	3.46711	4.23588	2.08266	0.00411476	0.05891
MD05G1247200	GO:0005385(zinc ion transmembrane transporter activity);GO:0005886(plasma membrane);GO:0071577(zinc II ion transmembrane transport)	NA	NA	NA	PREDICTED: zinc transporter 1-like [Malus domestica]	1.89099	5.51384	2.91585	1.54392	0.0313732	0.23427
MD05G1248100	GO:0004674(protein serine/threonine kinase activity);GO:0005886(plasma membrane);GO:0006468(protein phosphorylation)	NA	NA	NA	PREDICTED: LRR receptor-like serine/threonine-protein kinase GSO1 [Malus domestica]	0.633545	2.08917	3.29759	1.72141	0.0172027	0.158554
MD05G1249400	GO:0005739(mitochondrion);GO:0010239(chloroplast mRNA processing);GO:0031426(polycistronic mRNA processing);GO:0042644(chloroplast nucleoid)	NA	NA	NA	PREDICTED: LOW QUALITY PROTEIN: uncharacterized protein LOC103435300 [Malus domestica]	0.586017	6.31994	10.7846	3.4309	3.9753e-06	0.000294185
MD05G1250500	GO:0005515(protein binding);GO:0005634(nucleus);GO:0005789(endoplasmic reticulum membrane);GO:0005886(plasma membrane);GO:0007015(actin filament organization);GO:0009825(multidimensional cell growth);GO:0010090(trichome morphogenesis);GO:0031209(SCAR complex);GO:0045010(actin nucleation);GO:0045893(positive regulation of transcription, DNA-templated)	NA	NA	NA	PREDICTED: protein NAP1 [Malus domestica]	1.96427	6.10716	3.10913	1.63651	0.0206626	0.179295
MD05G1254200	GO:0005634(nucleus);GO:0009625(response to insect);GO:0030246(carbohydrate binding);GO:0043394(proteoglycan binding)	NA	NA	NA	PREDICTED: protein PHLOEM PROTEIN 2-LIKE A1-like [Malus domestica]	1.81966	10.0209	5.50703	2.46127	0.000652397	0.0155105
MD05G1263100	GO:0004674(protein serine/threonine kinase activity);GO:0005886(plasma membrane);GO:0006468(protein phosphorylation);GO:0006952(defense response);GO:0009506(plasmodesma)	00520(Amino sugar and nucleotide sugar metabolism)	K01183	EC:3.2.1.14	PREDICTED: G-type lectin S-receptor-like serine/threonine-protein kinase At1g11410 [Malus domestica]	0.448688	2.97489	6.6302	2.72905	0.000179146	0.00584384
MD05G1264000	GO:0002181(cytoplasmic translation);GO:0003735(structural constituent of ribosome);GO:0022625(cytosolic large ribosomal subunit)	03010(Ribosome)	K02938	NA	PREDICTED: 60S ribosomal protein L8-3-like [Malus domestica]	124.917	329.458	2.63741	1.39912	0.0471146	0.296214
MD05G1264700	GO:0003677(DNA binding);GO:0005634(nucleus);GO:0005739(mitochondrion);GO:0006355(regulation of transcription, DNA-templated);GO:0009886(post-embryonic morphogenesis)	NA	NA	NA	PREDICTED: protein G1-like1 [Pyrus x bretschneideri]	2.13976	16.16	7.55224	2.91691	6.50757e-05	0.00266682
MD05G1272700	GO:0005634(nucleus);GO:0005739(mitochondrion);GO:0005794(Golgi apparatus)	NA	NA	NA	PREDICTED: WPP domain-associated protein-like [Malus domestica]	0.678017	3.23375	4.76942	2.25381	0.00171179	0.0314153
MD05G1278400	GO:0005816(spindle pole body);GO:0006999(nuclear pore organization);GO:0017056(structural constituent of nuclear pore);GO:0030474(spindle pole body duplication);GO:0070762(nuclear pore transmembrane ring);GO:0071790(establishment of spindle pole body localization to nuclear envelope)	03013(RNA transport)	K14315	NA	PREDICTED: uncharacterized protein LOC103952408 [Pyrus x bretschneideri]	10.6807	41.1288	3.85075	1.94514	0.00577186	0.0758971
MD05G1279200	GO:0003677(DNA binding);GO:0003700(transcription factor activity, sequence-specific DNA binding);GO:0005515(protein binding);GO:0005634(nucleus);GO:0006351(transcription, DNA-templated);GO:0006355(regulation of transcription, DNA-templated);GO:0009733(response to auxin);GO:0009734(auxin-activated signaling pathway);GO:0009908(flower development)	04075(Plant hormone signal transduction)	K14486	NA	PREDICTED: auxin response factor 6-like isoform X1 [Malus domestica]	2.09187	7.61964	3.6425	1.86493	0.00844568	0.0999115
MD05G1280200	GO:0004161(dimethylallyltranstransferase activity);GO:0004659(prenyltransferase activity);GO:0005739(mitochondrion);GO:0006744(ubiquinone biosynthetic process);GO:0008299(isoprenoid biosynthetic process);GO:0009507(chloroplast);GO:0009536(plastid);GO:0009793(embryo development ending in seed dormancy);GO:0046872(metal ion binding);GO:0050347(trans-octaprenyltranstransferase activity);GO:0052924(a…	00900(Terpenoid backbone biosynthesis)	K14066	EC:2.5.1.1	hypothetical protein B456_011G047900 [Gossypium raimondii]	1.14301	4.24688	3.71553	1.89357	0.00827551	0.0985391
MD05G1280300	GO:0005634(nucleus)	NA	NA	NA	PREDICTED: uncharacterized protein LOC103419769 [Malus domestica]	12.0838	46.0764	3.81305	1.93095	0.00630059	0.081078
MD05G1281200	GO:0003674(molecular_function);GO:0005634(nucleus);GO:0010286(heat acclimation)	NA	NA	NA	PREDICTED: F-box protein At5g46170-like [Malus domestica]	4.85281	13.0607	2.69138	1.42834	0.0435834	0.281934
MD05G1285700	GO:0000166(nucleotide binding);GO:0003924(GTPase activity);GO:0005525(GTP binding);GO:0005737(cytoplasm);GO:0006807(nitrogen compound metabolic process);GO:0016020(membrane);GO:0016151(nickel cation binding);GO:0046872(metal ion binding)	NA	NA	NA	PREDICTED: urease accessory protein G [Malus domestica]	31.0847	86.0294	2.76758	1.46863	0.0371522	0.258775
MD05G1289200	GO:0009416(response to light stimulus);GO:0009535(chloroplast thylakoid membrane);GO:0009768(photosynthesis, light harvesting in photosystem I);GO:0009941(chloroplast envelope);GO:0010287(plastoglobule);GO:0016168(chlorophyll binding);GO:0031409(pigment binding)	00196(Photosynthesis - antenna proteins)	K08912	NA	PREDICTED: chlorophyll a-b binding protein of LHCII type 1 [Malus domestica]	4.52637	31.4754	6.95377	2.7978	0.000108292	0.00402
MD05G1289300	GO:0009416(response to light stimulus);GO:0009535(chloroplast thylakoid membrane);GO:0009768(photosynthesis, light harvesting in photosystem I);GO:0009941(chloroplast envelope);GO:0010287(plastoglobule);GO:0016168(chlorophyll binding);GO:0031409(pigment binding)	00196(Photosynthesis - antenna proteins)	K08912	NA	PREDICTED: chlorophyll a-b binding protein of LHCII type 1-like [Malus domestica]	30.9384	253.331	8.18825	3.03355	2.66808e-05	0.00136796
MD05G1292900	GO:0003677(DNA binding);GO:0005634(nucleus);GO:0006351(transcription, DNA-templated);GO:0006355(regulation of transcription, DNA-templated)	NA	NA	NA	PREDICTED: transcription factor GTE12 [Malus domestica]	21.5753	69.7733	3.23394	1.69329	0.0160512	0.151733
MD05G1301200	GO:0004152(dihydroorotate dehydrogenase activity);GO:0005737(cytoplasm);GO:0006207('de novo' pyrimidine nucleobase biosynthetic process)	00240(Pyrimidine metabolism)	K00254	EC:1.3.5.2	PREDICTED: dihydroorotate dehydrogenase (quinone), mitochondrial-like [Malus domestica]	2.44076	6.87906	2.8184	1.49488	0.0354532	0.25193
MD05G1301400	GO:0005509(calcium ion binding);GO:0005634(nucleus);GO:0005737(cytoplasm);GO:0005829(cytosol);GO:0005886(plasma membrane);GO:0009570(chloroplast stroma);GO:0019904(protein domain specific binding);GO:0045309(protein phosphorylated amino acid binding);GO:0048528(post-embryonic root development)	NA	NA	NA	PREDICTED: 14-3-3-like protein D [Malus domestica]	71.9672	213.299	2.96384	1.56747	0.025821	0.207978
MD05G1304500	GO:0005576(extracellular region);GO:0016042(lipid catabolic process);GO:0016788(hydrolase activity, acting on ester bonds);GO:0052689(carboxylic ester hydrolase activity)	NA	NA	NA	PREDICTED: GDSL esterase/lipase At5g45920 [Malus domestica]	1.67811	8.47614	5.05101	2.33657	0.00122419	0.0248259
MD05G1309600	GO:0003924(GTPase activity);GO:0005525(GTP binding);GO:0005634(nucleus);GO:0005730(nucleolus);GO:0006955(immune response);GO:0009507(chloroplast)	NA	NA	NA	PREDICTED: guanylate-binding protein 4-like [Malus domestica]	9.67609	27.9827	2.89194	1.53204	0.0295539	0.225721
MD05G1309700	GO:0003700(transcription factor activity, sequence-specific DNA binding);GO:0005634(nucleus);GO:0006351(transcription, DNA-templated);GO:0007275(multicellular organism development);GO:0044212(transcription regulatory region DNA binding);GO:0045893(positive regulation of transcription, DNA-templated);GO:2000652(regulation of secondary cell wall biogenesis)	NA	NA	NA	PREDICTED: NAC domain-containing protein 73 [Malus domestica]	1.16438	3.87282	3.32607	1.73382	0.0160657	0.151735
MD05G1309900	GO:0004674(protein serine/threonine kinase activity);GO:0005524(ATP binding);GO:0005886(plasma membrane);GO:0006468(protein phosphorylation);GO:0007169(transmembrane receptor protein tyrosine kinase signaling pathway);GO:0016021(integral component of membrane);GO:0016301(kinase activity);GO:0016310(phosphorylation)	04075(Plant hormone signal transduction)	K13415	EC:2.7.10.1;EC:2.7.11.1	LRR receptor-like protein kinase m1' [Malus domestica]	4.90207	15.733	3.20947	1.68233	0.0168776	0.156505
MD05G1312000	GO:0001709(cell fate determination);GO:0005515(protein binding);GO:0005634(nucleus);GO:0006351(transcription, DNA-templated);GO:0008270(zinc ion binding);GO:0010076(maintenance of floral meristem identity);GO:0010077(maintenance of inflorescence meristem identity);GO:0010492(maintenance of shoot apical meristem identity);GO:0016567(protein ubiquitination);GO:0016568(chromatin modification);GO:001…	NA	NA	NA	PREDICTED: putative E3 ubiquitin-protein ligase RING1a [Malus domestica]	11.0438	40.7557	3.69036	1.88376	0.00748392	0.0917121
MD05G1323100	GO:0005768(endosome);GO:0005794(Golgi apparatus);GO:0005802(trans-Golgi network);GO:0005829(cytosol);GO:0005886(plasma membrane);GO:0015031(protein transport);GO:0016020(membrane);GO:0016021(integral component of membrane);GO:0022857(transmembrane transporter activity);GO:0030658(transport vesicle membrane)	NA	NA	NA	PREDICTED: secretory carrier-associated membrane protein 3 isoform X2 [Malus domestica]	2.30967	7.58244	3.2829	1.71497	0.0158287	0.150877
MD05G1323300	GO:0000287(magnesium ion binding);GO:0005737(cytoplasm);GO:0008441(3'(2'),5'-bisphosphate nucleotidase activity)	00920(Sulfur metabolism)	K01082	EC:3.1.3.7	PREDICTED: PAP-specific phosphatase HAL2-like [Malus domestica]	1.47244	7.02027	4.76778	2.25332	0.00168973	0.0311104
MD05G1325400	GO:0003674(molecular_function);GO:0005634(nucleus);GO:0016567(protein ubiquitination)	NA	NA	NA	PREDICTED: F-box protein At1g61340-like [Malus domestica]	1.34374	7.49613	5.57853	2.47989	0.000638625	0.0152915
MD05G1326300	GO:0003674(molecular_function);GO:0008150(biological_process);GO:0009507(chloroplast);GO:0009570(chloroplast stroma)	NA	NA	NA	PREDICTED: uncharacterized protein LOC103419665 [Malus domestica]	1.26429	7.56454	5.98322	2.58092	0.000414659	0.0110642
MD05G1329600	GO:0004674(protein serine/threonine kinase activity);GO:0005886(plasma membrane);GO:0006468(protein phosphorylation);GO:0006952(defense response);GO:0009506(plasmodesma)	00520(Amino sugar and nucleotide sugar metabolism)	K01183	EC:3.2.1.14	PREDICTED: G-type lectin S-receptor-like serine/threonine-protein kinase B120, partial [Malus domestica]	5.07963	17.3522	3.41604	1.77233	0.0119177	0.126224
MD05G1333700	GO:0004674(protein serine/threonine kinase activity);GO:0005886(plasma membrane);GO:0006468(protein phosphorylation);GO:0006952(defense response);GO:0009506(plasmodesma)	00500(Starch and sucrose metabolism);00460(Cyanoamino acid metabolism);00940(Phenylpropanoid biosynthesis)	K05349	EC:3.2.1.21	PREDICTED: G-type lectin S-receptor-like serine/threonine-protein kinase At1g11410 isoform X2 [Pyrus x bretschneideri]	0.505381	2.08677	4.1291	2.04583	0.00477021	0.0655925
MD05G1335400	GO:0005634(nucleus)	NA	NA	NA	PREDICTED: uncharacterized protein LOC103434635 isoform X2 [Malus domestica]	38.2725	110.103	2.87682	1.52447	0.0302343	0.228854
MD05G1336200	GO:0005509(calcium ion binding);GO:0009507(chloroplast);GO:0009534(chloroplast thylakoid);GO:0009535(chloroplast thylakoid membrane);GO:0009543(chloroplast thylakoid lumen);GO:0009570(chloroplast stroma);GO:0009579(thylakoid);GO:0009654(photosystem II oxygen evolving complex);GO:0015979(photosynthesis);GO:0019898(extrinsic component of membrane);GO:0030095(chloroplast photosystem II);GO:0031977(t…	00195(Photosynthesis)	K08901	NA	PREDICTED: oxygen-evolving enhancer protein 3-2, chloroplastic [Malus domestica]	52.3523	188.788	3.6061	1.85044	0.00851544	0.100217
MD05G1336400	GO:0000103(sulfate assimilation);GO:0005829(cytosol);GO:0005886(plasma membrane);GO:0006457(protein folding);GO:0015035(protein disulfide oxidoreductase activity);GO:0016671(oxidoreductase activity, acting on a sulfur group of donors, disulfide as acceptor);GO:0034599(cellular response to oxidative stress);GO:0045454(cell redox homeostasis);GO:0055114(oxidation-reduction process)	NA	NA	NA	PREDICTED: thioredoxin-like protein CXXS1 [Malus domestica]	17.4234	290.576	16.6774	4.05982	6.50685e-08	1.0782e-05
MD05G1336900	GO:0003743(translation initiation factor activity);GO:0005634(nucleus);GO:0005852(eukaryotic translation initiation factor 3 complex)	03013(RNA transport)	K03250	NA	PREDICTED: eukaryotic translation initiation factor 3 subunit E [Vitis vinifera]	5.443	26.5735	4.88215	2.28752	0.00137863	0.0271535
MD05G1341900	GO:0003674(molecular_function);GO:0005634(nucleus);GO:0005737(cytoplasm);GO:0005886(plasma membrane);GO:0009416(response to light stimulus);GO:0040008(regulation of growth)	NA	NA	NA	PREDICTED: CRIB domain-containing protein RIC10-like isoform X2 [Malus domestica]	0.900552	9.01888	10.0148	3.32407	7.83432e-06	0.000506066
MD05G1345400	GO:0006995(cellular response to nitrogen starvation)	04140(Regulation of autophagy)	K08341	NA	PREDICTED: autophagy-related protein 8C-like [Malus domestica]	6.76292	86.5146	12.7925	3.67723	6.67053e-07	7.16127e-05
MD05G1345500	GO:0003674(molecular_function);GO:0008150(biological_process);GO:0009507(chloroplast)	NA	NA	NA	PREDICTED: uncharacterized protein LOC103434506 [Malus domestica]	23.768	165.088	6.94582	2.79615	9.75994e-05	0.0036647
MD05G1346400	NA	NA	NA	NA	PREDICTED: uncharacterized protein LOC103402133 [Malus domestica]	2.8948	10.5612	3.64833	1.86724	0.00886613	0.10281
MD05G1347800	NA	NA	NA	NA	hypothetical protein PRUPE_ppb011733mg [Prunus persica]	47.9802	135.581	2.82576	1.49864	0.0334049	0.24327
MD05G1352700	GO:0005739(mitochondrion)	NA	NA	NA	PREDICTED: translation initiation factor IF-2 [Malus domestica]	1.15581	3.93558	3.40503	1.76767	0.0153751	0.148766
MD05G1355900	GO:0006508(proteolysis);GO:0006511(ubiquitin-dependent protein catabolic process);GO:0008233(peptidase activity);GO:0016021(integral component of membrane)	NA	NA	NA	PREDICTED: uncharacterized membrane protein At1g16860-like isoform X1 [Malus domestica]	1.68406	4.76661	2.83043	1.50102	0.0351212	0.25054
MD05G1356500	GO:0003674(molecular_function);GO:0008150(biological_process)	NA	NA	NA	PREDICTED: uncharacterized protein LOC103434446 [Malus domestica]	9.52082	25.0826	2.6345	1.39753	0.0491465	0.302016
MD05G1359500	GO:0005576(extracellular region);GO:0007275(multicellular organism development);GO:0016020(membrane);GO:0016021(integral component of membrane);GO:0046872(metal ion binding);GO:0055114(oxidation-reduction process)	NA	NA	NA	PREDICTED: cytochrome b561 and DOMON domain-containing protein At5g47530-like [Malus domestica]	9.27441	24.6309	2.65579	1.40914	0.0461369	0.292734
MD05G1361500	GO:0003677(DNA binding);GO:0003700(transcription factor activity, sequence-specific DNA binding);GO:0005634(nucleus);GO:0006351(transcription, DNA-templated);GO:0006355(regulation of transcription, DNA-templated)	NA	NA	NA	PREDICTED: trihelix transcription factor GTL1-like [Pyrus x bretschneideri]	0.734173	2.75367	3.7507	1.90716	0.00814828	0.0975532
MD05G1362400	NA	NA	NA	NA	PREDICTED: U-box domain-containing protein 35 isoform X1 [Malus domestica]	2.76594	8.92221	3.22574	1.68963	0.0173405	0.159391
MD05G1363200	GO:0004871(signal transducer activity);GO:0005886(plasma membrane);GO:0009416(response to light stimulus);GO:0016567(protein ubiquitination)	00902(Monoterpenoid biosynthesis)	K15095	EC:1.1.1.208	PREDICTED: BTB/POZ domain-containing protein At5g47800-like [Pyrus x bretschneideri]	1.56359	9.15524	5.85526	2.54973	0.000381638	0.0103892
MD06G1001600	GO:0003674(molecular_function);GO:0005634(nucleus);GO:0005773(vacuole);GO:0005829(cytosol);GO:0005886(plasma membrane);GO:0008150(biological_process);GO:0016021(integral component of membrane)	NA	NA	NA	PREDICTED: titin homolog [Malus domestica]	4.41129	28.2931	6.4138	2.68118	0.000176171	0.00577977
MD06G1002100	GO:0002376(immune system process);GO:0003677(DNA binding);GO:0003700(transcription factor activity, sequence-specific DNA binding);GO:0005634(nucleus);GO:0005789(endoplasmic reticulum membrane);GO:0006351(transcription, DNA-templated);GO:0006355(regulation of transcription, DNA-templated);GO:0010200(response to chitin);GO:0016021(integral component of membrane);GO:0030968(endoplasmic reticulum un…	NA	NA	NA	PREDICTED: bZIP transcription factor 60 [Malus domestica]	45.2313	177.106	3.91557	1.96922	0.00515783	0.0697069
MD06G1003300	GO:0003824(catalytic activity);GO:0005575(cellular_component);GO:0009408(response to heat);GO:0009414(response to water deprivation);GO:0009737(response to abscisic acid);GO:0009809(lignin biosynthetic process);GO:0016621(cinnamoyl-CoA reductase activity);GO:0046686(response to cadmium ion);GO:0050662(coenzyme binding)	00940(Phenylpropanoid biosynthesis)	K09753	EC:1.2.1.44	PREDICTED: cinnamoyl-CoA reductase 1-like [Malus domestica]	23.0647	120.846	5.23942	2.38941	0.000758326	0.0173233
MD06G1006400	GO:0004365(glyceraldehyde-3-phosphate dehydrogenase (NAD+) (phosphorylating) activity);GO:0005829(cytosol);GO:0006006(glucose metabolic process);GO:0006096(glycolytic process);GO:0009409(response to cold);GO:0009416(response to light stimulus);GO:0009507(chloroplast);GO:0009535(chloroplast thylakoid membrane);GO:0009570(chloroplast stroma);GO:0009744(response to sucrose);GO:0009941(chloroplast en…	01200(Carbon metabolism);00710(Carbon fixation in photosynthetic organisms)	K05298	EC:1.2.1.13	glyceraldehyde-3-phosphate dehydrogenase B [Pyrus x bretschneideri]	3.11412	23.8333	7.65331	2.93608	6.09272e-05	0.00257052
MD06G1006500	GO:0004365(glyceraldehyde-3-phosphate dehydrogenase (NAD+) (phosphorylating) activity);GO:0005829(cytosol);GO:0006006(glucose metabolic process);GO:0006096(glycolytic process);GO:0009409(response to cold);GO:0009416(response to light stimulus);GO:0009507(chloroplast);GO:0009535(chloroplast thylakoid membrane);GO:0009570(chloroplast stroma);GO:0009744(response to sucrose);GO:0009941(chloroplast en…	01200(Carbon metabolism);00710(Carbon fixation in photosynthetic organisms)	K05298	EC:1.2.1.13	PREDICTED: glyceraldehyde-3-phosphate dehydrogenase B, chloroplastic [Malus domestica]	6.638	44.2148	6.66087	2.73571	0.000136158	0.00478269
MD06G1013000	GO:0043161(proteasome-mediated ubiquitin-dependent protein catabolic process);GO:0061630(ubiquitin protein ligase activity)	NA	NA	NA	PREDICTED: E3 ubiquitin-protein ligase RNF6 isoform X1 [Malus domestica]	0.907451	2.47669	2.72928	1.44852	0.0441132	0.284134
MD06G1015200	GO:0003677(DNA binding);GO:0005634(nucleus);GO:0006260(DNA replication);GO:0006281(DNA repair);GO:0006310(DNA recombination);GO:0008270(zinc ion binding)	03030(DNA replication);03420(Nucleotide excision repair);03430(Mismatch repair);03440(Homologous recombination)	K07466	NA	PREDICTED: LOW QUALITY PROTEIN: replication protein A 70 kDa DNA-binding subunit E-like [Malus domestica]	6.57609	17.5378	2.6669	1.41516	0.0449943	0.288009
MD06G1021000	GO:0003700(transcription factor activity, sequence-specific DNA binding);GO:0005515(protein binding);GO:0005634(nucleus);GO:0006351(transcription, DNA-templated);GO:0006355(regulation of transcription, DNA-templated);GO:0042802(identical protein binding);GO:0043565(sequence-specific DNA binding)	NA	NA	NA	PREDICTED: trihelix transcription factor GT-3b-like [Malus domestica]	6.91344	19.7286	2.85366	1.51281	0.0323883	0.238891
MD06G1023500	GO:0004849(uridine kinase activity);GO:0005829(cytosol);GO:0006206(pyrimidine nucleobase metabolic process);GO:0009507(chloroplast);GO:0043097(pyrimidine nucleoside salvage)	01200(Carbon metabolism);00710(Carbon fixation in photosynthetic organisms)	K00855	EC:2.7.1.19	PREDICTED: phosphoribulokinase, chloroplastic [Malus domestica]	23.3036	88.8546	3.81291	1.93089	0.00609904	0.0790627
MD06G1023900	GO:0005524(ATP binding);GO:0006952(defense response);GO:0009506(plasmodesma);GO:0043531(ADP binding)	04626(Plant-pathogen interaction)	K13457	NA	disease resistance protein RPM1-like [Malus domestica]	2.09156	5.79349	2.76993	1.46985	0.0399342	0.269113
MD06G1024000	NA	04626(Plant-pathogen interaction)	K13457	NA	disease resistance protein RPM1-like [Malus domestica]	3.42862	9.63102	2.80901	1.49006	0.0360282	0.254444
MD06G1024300	GO:0000166(nucleotide binding);GO:0005515(protein binding);GO:0005524(ATP binding);GO:0005886(plasma membrane);GO:0006952(defense response);GO:0009626(plant-type hypersensitive response);GO:0012505(endomembrane system);GO:0043531(ADP binding)	04626(Plant-pathogen interaction)	K13457	NA	PREDICTED: disease resistance protein RPM1-like [Malus domestica]	0.389428	3.21925	8.2666	3.04729	3.62298e-05	0.00174047
MD06G1025000	GO:0001664(G-protein coupled receptor binding);GO:0003924(GTPase activity);GO:0004871(signal transducer activity);GO:0005525(GTP binding);GO:0005634(nucleus);GO:0005737(cytoplasm);GO:0005834(heterotrimeric G-protein complex);GO:0007186(G-protein coupled receptor signaling pathway);GO:0007188(adenylate cyclase-modulating G-protein coupled receptor signaling pathway);GO:0009617(response to bacteriu…	NA	NA	NA	PREDICTED: extra-large guanine nucleotide-binding protein 3 [Malus domestica]	25.7517	114.754	4.45617	2.1558	0.00225328	0.0383091
MD06G1029300	GO:0000287(magnesium ion binding);GO:0004743(pyruvate kinase activity);GO:0005524(ATP binding);GO:0006096(glycolytic process);GO:0006633(fatty acid biosynthetic process);GO:0009507(chloroplast);GO:0009570(chloroplast stroma);GO:0016301(kinase activity);GO:0030955(potassium ion binding)	01200(Carbon metabolism);01230(Biosynthesis of amino acids);00010(Glycolysis / Gluconeogenesis);00620(Pyruvate metabolism);00230(Purine metabolism)	K00873	EC:2.7.1.40	PREDICTED: pyruvate kinase isozyme G, chloroplastic [Malus domestica]	9.12238	25.648	2.81154	1.49136	0.0344318	0.248477
MD06G1031000	GO:0005739(mitochondrion);GO:0005960(glycine cleavage complex);GO:0006546(glycine catabolic process);GO:0009507(chloroplast);GO:0019464(glycine decarboxylation via glycine cleavage system)	00630(Glyoxylate and dicarboxylate metabolism);00260(Glycine, serine and threonine metabolism)	K02437	NA	PREDICTED: glycine cleavage system H protein 3, mitochondrial [Malus domestica]	5.07441	40.2279	7.92761	2.98689	3.77312e-05	0.00180125
MD06G1032200	GO:0005634(nucleus);GO:0005886(plasma membrane);GO:0008150(biological_process)	00970(Aminoacyl-tRNA biosynthesis)	K01866	EC:6.1.1.1	PREDICTED: plant intracellular Ras-group-related LRR protein 5-like [Malus domestica]	16.0467	112.046	6.98251	2.80374	9.23044e-05	0.00350619
MD06G1035300	GO:0003674(molecular_function);GO:0005634(nucleus);GO:0005886(plasma membrane);GO:0008150(biological_process)	NA	NA	NA	PREDICTED: uncharacterized protein LOC103436902 [Malus domestica]	2.45642	16.6958	6.79678	2.76485	0.000146674	0.00506939
MD06G1036900	NA	NA	NA	NA	PREDICTED: uncharacterized protein LOC103436913 [Malus domestica]	84.1577	458.855	5.45232	2.44687	0.000566907	0.0139093
MD06G1038500	GO:0004176(ATP-dependent peptidase activity);GO:0005739(mitochondrion);GO:0006508(proteolysis);GO:0008237(metallopeptidase activity);GO:0009941(chloroplast envelope);GO:0010304(PSII associated light-harvesting complex II catabolic process)	03050(Proteasome)	K03064	NA	PREDICTED: ATP-dependent zinc metalloprotease FTSH 11, chloroplastic/mitochondrial [Malus domestica]	25.4022	88.6641	3.49041	1.8034	0.0103191	0.113623
MD06G1038900	GO:0004439(phosphatidylinositol-4,5-bisphosphate 5-phosphatase activity);GO:0004445(inositol-polyphosphate 5-phosphatase activity);GO:0005737(cytoplasm);GO:0009737(response to abscisic acid);GO:0009738(abscisic acid-activated signaling pathway);GO:0009845(seed germination);GO:0032957(inositol trisphosphate metabolic process);GO:0034485(phosphatidylinositol-3,4,5-trisphosphate 5-phosphatase activi…	00562(Inositol phosphate metabolism);04070(Phosphatidylinositol signaling system)	K01099	EC:3.1.3.36	PREDICTED: LOW QUALITY PROTEIN: type I inositol polyphosphate 5-phosphatase 2 [Malus domestica]	1.43893	5.69111	3.95511	1.98372	0.0069836	0.0871384
MD06G1039000	GO:0004439(phosphatidylinositol-4,5-bisphosphate 5-phosphatase activity);GO:0004445(inositol-polyphosphate 5-phosphatase activity);GO:0005737(cytoplasm);GO:0009737(response to abscisic acid);GO:0009738(abscisic acid-activated signaling pathway);GO:0009845(seed germination);GO:0032957(inositol trisphosphate metabolic process);GO:0034485(phosphatidylinositol-3,4,5-trisphosphate 5-phosphatase activi…	00562(Inositol phosphate metabolism);04070(Phosphatidylinositol signaling system)	K01099	EC:3.1.3.36	PREDICTED: LOW QUALITY PROTEIN: type I inositol polyphosphate 5-phosphatase 2 [Malus domestica]	1.57394	6.67712	4.2423	2.08485	0.00357824	0.0533401
MD06G1039100	GO:0004439(phosphatidylinositol-4,5-bisphosphate 5-phosphatase activity);GO:0004445(inositol-polyphosphate 5-phosphatase activity);GO:0005737(cytoplasm);GO:0009737(response to abscisic acid);GO:0009738(abscisic acid-activated signaling pathway);GO:0009845(seed germination);GO:0032957(inositol trisphosphate metabolic process);GO:0034485(phosphatidylinositol-3,4,5-trisphosphate 5-phosphatase activi…	00562(Inositol phosphate metabolism);04070(Phosphatidylinositol signaling system)	K01099	EC:3.1.3.36	PREDICTED: LOW QUALITY PROTEIN: type I inositol polyphosphate 5-phosphatase 2 [Malus domestica]	1.75537	7.47919	4.26074	2.0911	0.00412333	0.05891
MD06G1043800	GO:0005622(intracellular);GO:0006623(protein targeting to vacuole);GO:0019898(extrinsic component of membrane);GO:0045053(protein retention in Golgi apparatus)	NA	NA	NA	PREDICTED: uncharacterized protein LOC103961074 [Pyrus x bretschneideri]	2.35167	11.1483	4.74058	2.24506	0.00150136	0.0288473
MD06G1044400	GO:0004674(protein serine/threonine kinase activity);GO:0005524(ATP binding);GO:0005886(plasma membrane);GO:0006468(protein phosphorylation);GO:0016301(kinase activity)	04626(Plant-pathogen interaction)	K13430	EC:2.7.11.1	PREDICTED: probable receptor-like protein kinase At5g47070 [Pyrus x bretschneideri]	1.98103	8.60928	4.34586	2.11964	0.00309346	0.0482247
MD06G1051900	GO:0003677(DNA binding);GO:0003700(transcription factor activity, sequence-specific DNA binding);GO:0005622(intracellular);GO:0005634(nucleus);GO:0006351(transcription, DNA-templated);GO:0006355(regulation of transcription, DNA-templated);GO:0006952(defense response);GO:0009409(response to cold);GO:0009873(ethylene-activated signaling pathway);GO:0010200(response to chitin);GO:0045893(positive re…	00970(Aminoacyl-tRNA biosynthesis)	K01876	EC:6.1.1.12	PREDICTED: ethylene-responsive transcription factor 5-like [Pyrus x bretschneideri]	1.15656	3.85089	3.32962	1.73536	0.0170922	0.158046
MD06G1052300	GO:0005634(nucleus);GO:0008152(metabolic process);GO:0052689(carboxylic ester hydrolase activity)	04075(Plant hormone signal transduction)	K14493	EC:3.-.-.-	PREDICTED: carboxylesterase 1-like [Malus domestica]	2.11683	6.32341	2.98721	1.5788	0.0273329	0.214675
MD06G1054400	GO:0004842(ubiquitin-protein transferase activity);GO:0005737(cytoplasm);GO:0009966(regulation of signal transduction)	NA	NA	NA	PREDICTED: E3 ubiquitin-protein ligase HOS1 [Pyrus x bretschneideri]	3.26303	8.66625	2.65589	1.4092	0.048628	0.300376
MD06G1060200	GO:0005198(structural molecule activity);GO:0005515(protein binding);GO:0005622(intracellular);GO:0005623(cell);GO:0005634(nucleus);GO:0005783(endoplasmic reticulum);GO:0005789(endoplasmic reticulum membrane);GO:0005829(cytosol);GO:0005886(plasma membrane);GO:0006605(protein targeting);GO:0016021(integral component of membrane)	NA	NA	NA	PREDICTED: vesicle-associated protein 1-2-like [Malus domestica]	27.218	133.249	4.89562	2.29149	0.00120606	0.0245365
MD06G1075800	GO:0016020(membrane);GO:0016709(oxidoreductase activity, acting on paired donors, with incorporation or reduction of molecular oxygen, NAD(P)H as one donor, and incorporation of one atom of oxygen);GO:0044550(secondary metabolite biosynthetic process)	00941(Flavonoid biosynthesis);00944(Flavone and flavonol biosynthesis)	K13083	EC:1.14.13.88	PREDICTED: geraniol 8-hydroxylase-like isoform X1 [Malus domestica]	6.34975	19.9888	3.14797	1.65442	0.0198137	0.174597
MD06G1076000	GO:0016020(membrane);GO:0016709(oxidoreductase activity, acting on paired donors, with incorporation or reduction of molecular oxygen, NAD(P)H as one donor, and incorporation of one atom of oxygen);GO:0044550(secondary metabolite biosynthetic process)	00941(Flavonoid biosynthesis);00944(Flavone and flavonol biosynthesis)	K05280	EC:1.14.13.21	PREDICTED: cytochrome P450 76M5-like isoform X1 [Malus domestica]	10.2131	27.5939	2.70182	1.43393	0.0425878	0.278403
MD06G1079400	NA	NA	NA	NA	PREDICTED: uncharacterized protein LOC103410202 [Malus domestica]	0.531105	2.66074	5.00981	2.32476	0.00135314	0.026852
MD06G1079700	NA	NA	NA	NA	PREDICTED: uncharacterized protein LOC103410512 [Malus domestica]	1.8782	8.78303	4.6763	2.22537	0.00204457	0.0357168
MD06G1082200	GO:0003924(GTPase activity);GO:0005200(structural constituent of cytoskeleton);GO:0005525(GTP binding);GO:0005737(cytoplasm);GO:0005874(microtubule);GO:0005886(plasma membrane);GO:0007017(microtubule-based process);GO:0009409(response to cold);GO:0009651(response to salt stress);GO:0015630(microtubule cytoskeleton)	04145(Phagosome)	K07375	NA	PREDICTED: tubulin beta chain [Malus domestica]	1.93153	5.69877	2.95039	1.56091	0.0294188	0.225246
MD06G1085000	GO:0003674(molecular_function);GO:0005634(nucleus);GO:0008150(biological_process)	NA	NA	NA	PREDICTED: uncharacterized protein LOC103963857 [Pyrus x bretschneideri]	2.37809	6.99652	2.94207	1.55683	0.0275727	0.216001
MD06G1089200	GO:0005506(iron ion binding);GO:0006633(fatty acid biosynthetic process);GO:0009507(chloroplast);GO:0010291(carotene beta-ring hydroxylase activity);GO:0016021(integral component of membrane);GO:0016119(carotene metabolic process);GO:0016123(xanthophyll biosynthetic process);GO:0016491(oxidoreductase activity);GO:0016787(hydrolase activity);GO:0031969(chloroplast membrane);GO:0055114(oxidation-re…	00906(Carotenoid biosynthesis)	K15746	EC:1.14.13.129	PREDICTED: beta-carotene hydroxylase 2, chloroplastic-like isoform X1 [Pyrus x bretschneideri]	4.98633	13.6605	2.7396	1.45396	0.0403529	0.270919
MD06G1093400	NA	NA	NA	NA	PREDICTED: uncharacterized protein LOC103417701 [Malus domestica]	2.52476	8.94853	3.54431	1.8255	0.0118253	0.125306
MD06G1097000	GO:0005451(monovalent cation:proton antiporter activity);GO:0006885(regulation of pH);GO:0012505(endomembrane system)	NA	NA	NA	PREDICTED: cation/H(+) antiporter 18 [Malus domestica]	1.03283	7.90592	7.65463	2.93633	5.39515e-05	0.00235891
MD06G1102300	GO:0003779(actin binding);GO:0005515(protein binding);GO:0005634(nucleus);GO:0005773(vacuole);GO:0005774(vacuolar membrane);GO:0005856(cytoskeleton);GO:0009507(chloroplast);GO:0042306(regulation of protein import into nucleus)	NA	NA	NA	PREDICTED: flagellar attachment zone protein 1 isoform X2 [Pyrus x bretschneideri]	14.7671	41.1514	2.7867	1.47856	0.0357373	0.253083
MD06G1104100	GO:0009737(response to abscisic acid)	04626(Plant-pathogen interaction)	K16225	NA	PREDICTED: probable WRKY transcription factor 53 [Malus domestica]	7.11592	28.4849	4.00298	2.00107	0.0046207	0.0641149
MD06G1105300	GO:0004650(polygalacturonase activity);GO:0005576(extracellular region);GO:0005975(carbohydrate metabolic process);GO:0071555(cell wall organization)	00040(Pentose and glucuronate interconversions);00500(Starch and sucrose metabolism)	K01184	EC:3.2.1.15	PREDICTED: probable polygalacturonase [Prunus mume]	1.86056	4.90418	2.63587	1.39828	0.0497209	0.304165
MD06G1108400	GO:0003674(molecular_function);GO:0008150(biological_process);GO:0009507(chloroplast)	NA	NA	NA	PREDICTED: uncharacterized protein LOC103949237 [Pyrus x bretschneideri]	2.99407	7.96872	2.6615	1.41224	0.0466236	0.294522
MD06G1110300	GO:0005634(nucleus);GO:0005884(actin filament);GO:0009055(electron carrier activity);GO:0009902(chloroplast relocation);GO:0015035(protein disulfide oxidoreductase activity);GO:0045454(cell redox homeostasis);GO:0051017(actin filament bundle assembly)	NA	NA	NA	PREDICTED: LOW QUALITY PROTEIN: uncharacterized protein At3g28850 [Malus domestica]	4.69944	13.3639	2.84373	1.50779	0.0334855	0.243625
MD06G1111100	GO:0003677(DNA binding);GO:0003700(transcription factor activity, sequence-specific DNA binding);GO:0005515(protein binding);GO:0005634(nucleus);GO:0006351(transcription, DNA-templated);GO:0006355(regulation of transcription, DNA-templated);GO:0009734(auxin-activated signaling pathway)	04075(Plant hormone signal transduction)	K14486	NA	PREDICTED: auxin response factor 9 [Pyrus x bretschneideri]	3.40622	12.3855	3.63615	1.86241	0.00829988	0.0986965
MD06G1114200	GO:0005634(nucleus);GO:0016567(protein ubiquitination)	NA	NA	NA	PREDICTED: BTB/POZ domain-containing protein At3g05675-like [Malus domestica]	3.11956	12.7056	4.07289	2.02605	0.0042794	0.0604429
MD06G1115800	GO:0004672(protein kinase activity);GO:0004674(protein serine/threonine kinase activity);GO:0004714(transmembrane receptor protein tyrosine kinase activity);GO:0005496(steroid binding);GO:0005515(protein binding);GO:0005524(ATP binding);GO:0005768(endosome);GO:0005886(plasma membrane);GO:0009729(detection of brassinosteroid stimulus);GO:0009742(brassinosteroid mediated signaling pathway);GO:00098…	04075(Plant hormone signal transduction)	K13415	EC:2.7.10.1;EC:2.7.11.1	PREDICTED: uncharacterized protein LOC103401427 isoform X1 [Malus domestica]	0.301136	1.33069	4.4189	2.14369	0.00336132	0.0510069
MD06G1122000	GO:0007154(cell communication);GO:0009505(plant-type cell wall);GO:0030247(polysaccharide binding);GO:0042973(glucan endo-1,3-beta-D-glucosidase activity);GO:0046658(anchored component of plasma membrane)	00500(Starch and sucrose metabolism)	K19891	EC:3.2.1.39	PREDICTED: glucan endo-1,3-beta-glucosidase 11-like [Malus domestica]	2.20297	11.2848	5.12254	2.35686	0.000964603	0.0206532
MD06G1124900	GO:0005737(cytoplasm);GO:0008270(zinc ion binding);GO:0016021(integral component of membrane)	NA	NA	NA	PREDICTED: E3 ubiquitin-protein ligase MARCH3 isoform X2 [Malus domestica]	1.7611	9.74511	5.53352	2.4682	0.000612974	0.0148202
MD06G1127300	GO:0005200(structural constituent of cytoskeleton);GO:0005515(protein binding);GO:0005524(ATP binding);GO:0005618(cell wall);GO:0005730(nucleolus);GO:0005737(cytoplasm);GO:0005739(mitochondrion);GO:0005829(cytosol);GO:0005856(cytoskeleton);GO:0005886(plasma membrane);GO:0007010(cytoskeleton organization);GO:0009416(response to light stimulus);GO:0009506(plasmodesma);GO:0009570(chloroplast stroma)…	04145(Phagosome)	K05692	NA	PREDICTED: actin-7 [Malus domestica]	94.6072	334.375	3.53436	1.82145	0.00956906	0.108217
MD06G1127400	GO:0005634(nucleus);GO:0008270(zinc ion binding);GO:0016021(integral component of membrane);GO:0016567(protein ubiquitination)	NA	NA	NA	PREDICTED: RING-H2 finger protein ATL79-like [Malus domestica]	1.82746	6.99032	3.82516	1.93552	0.00779797	0.0944972
MD06G1127900	GO:0005794(Golgi apparatus);GO:0016021(integral component of membrane);GO:0016740(transferase activity);GO:0016757(transferase activity, transferring glycosyl groups)	NA	NA	NA	PREDICTED: uncharacterized protein LOC103438675 [Malus domestica]	0.536389	2.36833	4.41531	2.14252	0.00312357	0.0484248
MD06G1132700	GO:0000036(ACP phosphopantetheine attachment site binding involved in fatty acid biosynthetic process);GO:0005829(cytosol);GO:0006633(fatty acid biosynthetic process);GO:0009507(chloroplast)	00190(Oxidative phosphorylation)	K03955	NA	PREDICTED: acyl carrier protein 1, chloroplastic-like [Malus domestica]	4.8777	14.232	2.91776	1.54486	0.0293802	0.225071
MD06G1133700	GO:0005634(nucleus);GO:0005737(cytoplasm)	NA	NA	NA	PREDICTED: U-box domain-containing protein 11 [Malus domestica]	1.49202	4.53129	3.03701	1.60265	0.0252897	0.205691
MD06G1135200	GO:0003677(DNA binding);GO:0005737(cytoplasm);GO:0008150(biological_process)	NA	NA	NA	PREDICTED: uncharacterized protein LOC103934197 [Pyrus x bretschneideri]	0.177054	1.25289	7.07629	2.82299	0.000133486	0.00472512
MD06G1141200	GO:0003677(DNA binding);GO:0003700(transcription factor activity, sequence-specific DNA binding);GO:0005515(protein binding);GO:0005634(nucleus);GO:0006351(transcription, DNA-templated);GO:0006355(regulation of transcription, DNA-templated);GO:0016602(CCAAT-binding factor complex);GO:0045893(positive regulation of transcription, DNA-templated);GO:0046982(protein heterodimerization activity)	00230(Purine metabolism);00240(Pyrimidine metabolism);03020(RNA polymerase)	K03004	NA	PREDICTED: nuclear transcription factor Y subunit C-1-like [Malus domestica]	1.46469	4.18247	2.85553	1.51376	0.036814	0.257722
MD06G1142100	GO:0003674(molecular_function);GO:0005634(nucleus);GO:0008150(biological_process)	03008(Ribosome biogenesis in eukaryotes)	K07178	EC:2.7.11.1	PREDICTED: uncharacterized protein LOC103437536 isoform X1 [Malus domestica]	10.2603	29.2262	2.84848	1.51019	0.0324169	0.238891
MD06G1148800	GO:0003677(DNA binding);GO:0004365(glyceraldehyde-3-phosphate dehydrogenase (NAD+) (phosphorylating) activity);GO:0005507(copper ion binding);GO:0005634(nucleus);GO:0005737(cytoplasm);GO:0005739(mitochondrion);GO:0005740(mitochondrial envelope);GO:0005774(vacuolar membrane);GO:0005794(Golgi apparatus);GO:0005829(cytosol);GO:0005886(plasma membrane);GO:0006094(gluconeogenesis);GO:0006096(glycolyti…	01200(Carbon metabolism);01230(Biosynthesis of amino acids);00010(Glycolysis / Gluconeogenesis);00710(Carbon fixation in photosynthetic organisms)	K00134	EC:1.2.1.12	PREDICTED: glyceraldehyde-3-phosphate dehydrogenase, cytosolic-like [Pyrus x bretschneideri]	0.898473	5.07755	5.65131	2.49858	0.000603021	0.0146073
MD06G1149300	GO:0005737(cytoplasm);GO:0008146(sulfotransferase activity);GO:0009507(chloroplast);GO:0009694(jasmonic acid metabolic process);GO:0009753(response to jasmonic acid);GO:0080131(hydroxyjasmonate sulfotransferase activity)	00966(Glucosinolate biosynthesis)	NA	NA	PREDICTED: flavonol 4'-sulfotransferase-like [Pyrus x bretschneideri]	2.35677	14.501	6.15292	2.62127	0.000337166	0.00949503
MD06G1152200	GO:0000123(histone acetyltransferase complex);GO:0002098(tRNA wobble uridine modification);GO:0004402(histone acetyltransferase activity);GO:0005737(cytoplasm);GO:0006357(regulation of transcription from RNA polymerase II promoter);GO:0006368(transcription elongation from RNA polymerase II promoter);GO:0008023(transcription elongation factor complex);GO:0033588(Elongator holoenzyme complex)	NA	NA	NA	PREDICTED: elongator complex protein 3 [Pyrus x bretschneideri]	1.26011	4.15129	3.29438	1.72001	0.01844	0.166601
MD06G1155800	GO:0000166(nucleotide binding);GO:0005515(protein binding);GO:0005524(ATP binding);GO:0005886(plasma membrane);GO:0006952(defense response);GO:0009626(plant-type hypersensitive response);GO:0012505(endomembrane system);GO:0043531(ADP binding)	04626(Plant-pathogen interaction)	K13457	NA	PREDICTED: disease resistance protein RPM1-like [Malus domestica]	0.319432	1.09986	3.44316	1.78373	0.0148906	0.146014
MD06G1161700	GO:0004674(protein serine/threonine kinase activity);GO:0004713(protein tyrosine kinase activity);GO:0004714(transmembrane receptor protein tyrosine kinase activity);GO:0005524(ATP binding);GO:0005886(plasma membrane);GO:0006468(protein phosphorylation);GO:0006952(defense response);GO:0007169(transmembrane receptor protein tyrosine kinase signaling pathway);GO:0010942(positive regulation of cell …	04075(Plant hormone signal transduction)	K13415	EC:2.7.10.1;EC:2.7.11.1	PREDICTED: leucine-rich repeat receptor-like serine/threonine/tyrosine-protein kinase SOBIR1 [Malus domestica]	4.25026	26.6093	6.26063	2.64631	0.000214114	0.00671625
MD06G1163300	GO:0016020(membrane);GO:0016709(oxidoreductase activity, acting on paired donors, with incorporation or reduction of molecular oxygen, NAD(P)H as one donor, and incorporation of one atom of oxygen);GO:0044550(secondary metabolite biosynthetic process)	00903(Limonene and pinene degradation);00945(Stilbenoid, diarylheptanoid and gingerol biosynthesis)	K00517	NA	PREDICTED: cytochrome P450 71A3-like [Malus domestica]	0.889758	2.65765	2.98693	1.57866	0.0284892	0.22151
MD06G1165300	GO:0004674(protein serine/threonine kinase activity);GO:0005829(cytosol);GO:0006468(protein phosphorylation);GO:0035556(intracellular signal transduction)	04075(Plant hormone signal transduction)	K14510	EC:2.7.11.1	PREDICTED: probable serine/threonine-protein kinase WNK3 isoform X1 [Malus domestica]	1.77644	4.90404	2.76059	1.46498	0.039573	0.268123
MD06G1166600	GO:0004004(ATP-dependent RNA helicase activity);GO:0010501(RNA secondary structure unwinding)	03040(Spliceosome)	K12823	EC:3.6.4.13	PREDICTED: DEAD-box ATP-dependent RNA helicase 20-like [Malus domestica]	12.8791	43.7829	3.39954	1.76534	0.012097	0.1271
MD06G1170100	GO:0003674(molecular_function);GO:0005634(nucleus);GO:0008150(biological_process)	NA	NA	NA	PREDICTED: probable kinetochore protein SPC25 [Malus domestica]	2.01149	13.7736	6.84749	2.77557	0.000125106	0.00449721
MD06G1170200	GO:0004674(protein serine/threonine kinase activity);GO:0005524(ATP binding);GO:0005886(plasma membrane);GO:0006468(protein phosphorylation);GO:0007169(transmembrane receptor protein tyrosine kinase signaling pathway);GO:0016021(integral component of membrane);GO:0016301(kinase activity);GO:0016310(phosphorylation)	04075(Plant hormone signal transduction)	K13415	EC:2.7.10.1;EC:2.7.11.1	PREDICTED: probable LRR receptor-like serine/threonine-protein kinase At4g26540 [Malus domestica]	0.296516	7.15122	24.1175	4.59201	3.81472e-09	9.69236e-07
MD06G1173800	GO:0003950(NAD+ ADP-ribosyltransferase activity);GO:0005634(nucleus);GO:0005739(mitochondrion);GO:0007275(multicellular organism development);GO:0009651(response to salt stress);GO:0016363(nuclear matrix);GO:0072593(reactive oxygen species metabolic process)	NA	NA	NA	PREDICTED: probable inactive poly [ADP-ribose] polymerase SRO5 [Malus domestica]	5.05838	32.6174	6.4482	2.6889	0.000173012	0.0057089
MD06G1175200	GO:0004712(protein serine/threonine/tyrosine kinase activity);GO:0004713(protein tyrosine kinase activity);GO:0005524(ATP binding);GO:0005829(cytosol);GO:0005886(plasma membrane);GO:0016301(kinase activity)	04075(Plant hormone signal transduction)	K14510	EC:2.7.11.1	PREDICTED: serine/threonine-protein kinase HT1-like [Malus domestica]	1.54393	7.31898	4.74049	2.24504	0.00168611	0.0310687
MD06G1178700	GO:0003674(molecular_function);GO:0005634(nucleus)	NA	NA	NA	PREDICTED: uncharacterized protein LOC103437750 [Malus domestica]	1.86067	6.97569	3.74902	1.90651	0.00788888	0.0953135
MD06G1181900	GO:0004526(ribonuclease P activity);GO:0005655(nucleolar ribonuclease P complex);GO:0090502(RNA phosphodiester bond hydrolysis, endonucleolytic)	03040(Spliceosome);04141(Protein processing in endoplasmic reticulum);04144(Endocytosis)	K03283	NA	PREDICTED: protein SUPPRESSOR OF GENE SILENCING 3-like [Malus domestica]	1.27705	4.6548	3.64496	1.8659	0.00924547	0.105867
MD06G1182000	GO:0005515(protein binding);GO:0005680(anaphase-promoting complex);GO:0007067(mitotic nuclear division);GO:0016567(protein ubiquitination);GO:0030071(regulation of mitotic metaphase/anaphase transition);GO:0031347(regulation of defense response);GO:0051301(cell division)	04120(Ubiquitin mediated proteolysis)	K03355	NA	PREDICTED: anaphase-promoting complex subunit 8 [Malus domestica]	7.7793	24.2213	3.11355	1.63856	0.0200252	0.175582
MD06G1182600	GO:0000304(response to singlet oxygen);GO:0001666(response to hypoxia);GO:0004806(triglyceride lipase activity);GO:0004871(signal transducer activity);GO:0005515(protein binding);GO:0005634(nucleus);GO:0005737(cytoplasm);GO:0005783(endoplasmic reticulum);GO:0006629(lipid metabolic process);GO:0006952(defense response);GO:0009507(chloroplast);GO:0009626(plant-type hypersensitive response);GO:00096…	04626(Plant-pathogen interaction)	K18875	NA	PREDICTED: protein EDS1L-like [Malus domestica]	2.51906	6.96812	2.76616	1.46788	0.039106	0.265746
MD06G1184200	GO:0000139(Golgi membrane);GO:0005080(protein kinase C binding);GO:0005198(structural molecule activity);GO:0005515(protein binding);GO:0005794(Golgi apparatus);GO:0005829(cytosol);GO:0006886(intracellular protein transport);GO:0006888(ER to Golgi vesicle-mediated transport);GO:0006890(retrograde vesicle-mediated transport, Golgi to ER);GO:0006891(intra-Golgi vesicle-mediated transport);GO:003012…	NA	NA	NA	PREDICTED: coatomer subunit beta'-1-like [Malus domestica]	2.36417	8.71134	3.68473	1.88156	0.00839996	0.0995244
MD06G1185000	GO:0005524(ATP binding);GO:0005739(mitochondrion);GO:0005783(endoplasmic reticulum);GO:0005886(plasma membrane);GO:0009409(response to cold);GO:0009414(response to water deprivation);GO:0009651(response to salt stress);GO:0009737(response to abscisic acid);GO:0010154(fruit development);GO:0010431(seed maturation);GO:0016021(integral component of membrane);GO:0016887(ATPase activity);GO:0031966(mi…	03008(Ribosome biogenesis in eukaryotes)	K14575	NA	PREDICTED: AAA-ATPase ASD, mitochondrial-like [Pyrus x bretschneideri]	1.10729	12.0909	10.9193	3.44881	3.07751e-06	0.000234578
MD06G1185200	GO:0005886(plasma membrane);GO:0005975(carbohydrate metabolic process);GO:0016901(oxidoreductase activity, acting on the CH-OH group of donors, quinone or similar compound as acceptor);GO:0031225(anchored component of membrane);GO:0046658(anchored component of plasma membrane);GO:0048038(quinone binding);GO:0055114(oxidation-reduction process)	NA	NA	NA	PREDICTED: HIPL1 protein-like [Malus domestica]	7.3973	24.0027	3.24479	1.69813	0.0158576	0.150957
MD06G1186100	GO:0005737(cytoplasm);GO:0006457(protein folding);GO:0051082(unfolded protein binding)	04141(Protein processing in endoplasmic reticulum)	K09503	NA	PREDICTED: dnaJ homolog subfamily B member 1-like [Pyrus x bretschneideri]	1.26402	3.40872	2.69672	1.43121	0.0481559	0.29927
MD06G1193900	GO:0010189(vitamin E biosynthetic process);GO:0015995(chlorophyll biosynthetic process);GO:0033385(geranylgeranyl diphosphate metabolic process);GO:0033521(phytyl diphosphate biosynthetic process);GO:0045550(geranylgeranyl reductase activity)	00860(Porphyrin and chlorophyll metabolism);00900(Terpenoid backbone biosynthesis)	K10960	EC:1.3.1.83	PREDICTED: geranylgeranyl diphosphate reductase, chloroplastic [Malus domestica]	3.46317	10.1447	2.92931	1.55056	0.0288362	0.222995
MD06G1195600	GO:0003674(molecular_function);GO:0006810(transport);GO:0009507(chloroplast);GO:0009535(chloroplast thylakoid membrane);GO:0009773(photosynthetic electron transport in photosystem I);GO:0010598(NAD(P)H dehydrogenase complex (plastoquinone));GO:0016021(integral component of membrane)	NA	NA	NA	PREDICTED: photosynthetic NDH subunit of subcomplex B 4, chloroplastic-like [Malus domestica]	4.95914	37.9458	7.65169	2.93578	5.08178e-05	0.00225641
MD06G1197300	GO:0000156(phosphorelay response regulator activity);GO:0000160(phosphorelay signal transduction system);GO:0003677(DNA binding);GO:0003700(transcription factor activity, sequence-specific DNA binding);GO:0005515(protein binding);GO:0005634(nucleus);GO:0006351(transcription, DNA-templated);GO:0006355(regulation of transcription, DNA-templated);GO:0007623(circadian rhythm);GO:0009908(flower develo…	04712(Circadian rhythm - plant)	K12127	NA	PREDICTED: two-component response regulator-like APRR1 [Malus domestica]	8.67578	37.4721	4.31916	2.11075	0.00281308	0.0450467
MD06G1200300	GO:0004143(diacylglycerol kinase activity);GO:0005509(calcium ion binding);GO:0005524(ATP binding);GO:0005737(cytoplasm);GO:0006952(defense response);GO:0007205(protein kinase C-activating G-protein coupled receptor signaling pathway);GO:0016021(integral component of membrane);GO:0016310(phosphorylation);GO:0035556(intracellular signal transduction)	00561(Glycerolipid metabolism);00564(Glycerophospholipid metabolism);04070(Phosphatidylinositol signaling system)	K00901	EC:2.7.1.107	PREDICTED: diacylglycerol kinase 1-like isoform X1 [Malus domestica]	1.45082	5.13302	3.538	1.82294	0.0107391	0.116939
MD06G1201700	GO:0016020(membrane);GO:0016709(oxidoreductase activity, acting on paired donors, with incorporation or reduction of molecular oxygen, NAD(P)H as one donor, and incorporation of one atom of oxygen);GO:0044550(secondary metabolite biosynthetic process)	00941(Flavonoid biosynthesis);00944(Flavone and flavonol biosynthesis)	K05280	EC:1.14.13.21	PREDICTED: flavonoid 3'-monooxygenase [Malus domestica]	8.13894	30.7007	3.77208	1.91536	0.00657484	0.0834796
MD06G1202000	NA	00500(Starch and sucrose metabolism)	K19891	EC:3.2.1.39	PREDICTED: PLASMODESMATA CALLOSE-BINDING PROTEIN 3-like [Malus domestica]	2.54674	12.1488	4.77034	2.25409	0.00165465	0.0306124
MD06G1205900	GO:0003677(DNA binding);GO:0003700(transcription factor activity, sequence-specific DNA binding);GO:0005634(nucleus);GO:0006351(transcription, DNA-templated);GO:0006355(regulation of transcription, DNA-templated);GO:0044212(transcription regulatory region DNA binding);GO:0046872(metal ion binding)	04712(Circadian rhythm - plant)	K16222	NA	dof zinc finger protein DOF5.4 [Malus domestica]	4.08485	14.6016	3.57458	1.83777	0.00964576	0.108816
MD06G1206100	GO:0005737(cytoplasm)	00561(Glycerolipid metabolism);00564(Glycerophospholipid metabolism)	K13506	EC:2.3.1.15	PREDICTED: uncharacterized protein At1g04910-like [Malus domestica]	0.950811	3.88233	4.08317	2.02969	0.00454344	0.0633467
MD06G1210500	GO:0003674(molecular_function);GO:0005739(mitochondrion);GO:0008150(biological_process)	NA	NA	NA	PREDICTED: uncharacterized protein LOC103428315 [Malus domestica]	4.55906	27.894	6.11836	2.61315	0.000299581	0.00870461
MD06G1212900	GO:0003674(molecular_function);GO:0005886(plasma membrane);GO:0008150(biological_process);GO:0016021(integral component of membrane)	NA	NA	NA	PREDICTED: proline-rich protein HaeIII subfamily 1-like [Malus domestica]	2.49146	7.65813	3.07375	1.62	0.0229339	0.192912
MD06G1215500	GO:0003677(DNA binding);GO:0003700(transcription factor activity, sequence-specific DNA binding);GO:0005634(nucleus);GO:0006351(transcription, DNA-templated);GO:0006355(regulation of transcription, DNA-templated);GO:0009873(ethylene-activated signaling pathway)	04626(Plant-pathogen interaction)	K13434	NA	PREDICTED: ethylene-responsive transcription factor CRF6-like isoform X1 [Malus domestica]	2.21482	7.07844	3.19594	1.67624	0.0183291	0.16573
MD06G1216300	GO:0003674(molecular_function);GO:0005634(nucleus);GO:0008150(biological_process)	NA	NA	NA	PREDICTED: uncharacterized protein LOC103428317 [Malus domestica]	325.432	2397.91	7.3684	2.88135	6.03783e-05	0.00256154
MD06G1216600	GO:0003723(RNA binding);GO:0009507(chloroplast);GO:0009737(response to abscisic acid);GO:0009793(embryo development ending in seed dormancy)	03018(RNA degradation)	K01148	EC:3.1.13.4	PREDICTED: CRM-domain containing factor CFM3, chloroplastic/mitochondrial-like [Malus domestica]	9.02604	29.0805	3.22184	1.68789	0.0164503	0.153915
MD06G1216900	GO:0003674(molecular_function);GO:0005739(mitochondrion);GO:0008150(biological_process);GO:0016021(integral component of membrane)	NA	NA	NA	PREDICTED: uncharacterized protein LOC103438004 [Malus domestica]	9.30235	24.4845	2.63208	1.3962	0.0479427	0.298721
MD06G1217200	GO:0003677(DNA binding);GO:0003700(transcription factor activity, sequence-specific DNA binding);GO:0005634(nucleus);GO:0006355(regulation of transcription, DNA-templated)	00190(Oxidative phosphorylation);00860(Porphyrin and chlorophyll metabolism)	K02259	NA	PREDICTED: transcription factor WER [Malus domestica]	8.29081	22.1217	2.66822	1.41588	0.0452451	0.289081
MD06G1218900	GO:0004674(protein serine/threonine kinase activity);GO:0005886(plasma membrane);GO:0007166(cell surface receptor signaling pathway)	04626(Plant-pathogen interaction)	K13430	EC:2.7.11.1	PREDICTED: LEAF RUST 10 DISEASE-RESISTANCE LOCUS RECEPTOR-LIKE PROTEIN KINASE-like 1.2 isoform X3 [Malus domestica]	1.65447	7.35891	4.44791	2.15313	0.00253444	0.0416343
MD06G1220700	GO:0005634(nucleus);GO:0008270(zinc ion binding)	03013(RNA transport)	K14297	NA	PREDICTED: uncharacterized protein LOC103438030 [Malus domestica]	6.22	17.7061	2.84664	1.50926	0.0328246	0.24106
MD06G1227300	GO:0005634(nucleus);GO:0008168(methyltransferase activity);GO:0008757(S-adenosylmethionine-dependent methyltransferase activity);GO:0032259(methylation)	00592(alpha-Linolenic acid metabolism)	K08241	EC:2.1.1.141	PREDICTED: probable S-adenosylmethionine-dependent methyltransferase At5g37990 [Malus domestica]	1.1718	6.9177	5.90348	2.56157	0.000431971	0.0113932
MD06G1228000	GO:0003674(molecular_function);GO:0005634(nucleus);GO:0008150(biological_process)	NA	NA	NA	PREDICTED: uncharacterized protein At3g17950 [Malus domestica]	3.64413	14.5862	4.00267	2.00096	0.00505254	0.0684458
MD06G1229600	GO:0003677(DNA binding);GO:0003700(transcription factor activity, sequence-specific DNA binding);GO:0005634(nucleus);GO:0006351(transcription, DNA-templated);GO:0006355(regulation of transcription, DNA-templated);GO:0009611(response to wounding);GO:0009651(response to salt stress);GO:0009737(response to abscisic acid);GO:0009751(response to salicylic acid);GO:0009800(cinnamic acid biosynthetic pr…	00190(Oxidative phosphorylation);00860(Porphyrin and chlorophyll metabolism)	K02259	NA	PREDICTED: transcription repressor MYB6-like [Malus domestica]	2.81378	12.2913	4.36825	2.12706	0.00289045	0.0460598
MD06G1233800	GO:0006629(lipid metabolic process);GO:0016020(membrane);GO:0016298(lipase activity)	00561(Glycerolipid metabolism)	K01054	EC:3.1.1.23	PREDICTED: caffeoylshikimate esterase-like [Malus domestica]	2.54016	13.3183	5.24311	2.39042	0.000804993	0.0179763
MD06G1234600	GO:0003676(nucleic acid binding);GO:0003700(transcription factor activity, sequence-specific DNA binding);GO:0005634(nucleus);GO:0006351(transcription, DNA-templated);GO:0006355(regulation of transcription, DNA-templated);GO:0008270(zinc ion binding);GO:0009630(gravitropism);GO:0009965(leaf morphogenesis);GO:0010601(positive regulation of auxin biosynthetic process);GO:0043621(protein self-associ…	00052(Galactose metabolism);00600(Sphingolipid metabolism);00531(Glycosaminoglycan degradation);00604(Glycosphingolipid biosynthesis - ganglio series);00511(Other glycan degradation)	K12309	EC:3.2.1.23	protein SHOOT GRAVITROPISM 5-like [Malus domestica]	0.539865	3.74964	6.94552	2.79608	0.000144245	0.00500523
MD06G1235500	GO:0004351(glutamate decarboxylase activity);GO:0005516(calmodulin binding);GO:0005634(nucleus);GO:0005829(cytosol);GO:0006536(glutamate metabolic process);GO:0030170(pyridoxal phosphate binding)	00650(Butanoate metabolism);00250(Alanine, aspartate and glutamate metabolism);00410(beta-Alanine metabolism);00430(Taurine and hypotaurine metabolism)	K01580	EC:4.1.1.15	PREDICTED: glutamate decarboxylase 4-like [Pyrus x bretschneideri]	3.74953	49.0447	13.0802	3.70931	5.78286e-07	6.38825e-05
MD06G1238400	GO:0003779(actin binding);GO:0005737(cytoplasm);GO:0005739(mitochondrion)	NA	NA	NA	PREDICTED: kinase-interacting family protein-like [Malus domestica]	13.0025	103.416	7.95352	2.99159	3.3823e-05	0.0016456
MD07G1004800	NA	NA	NA	NA	-	2.52906	9.25056	3.6577	1.87094	0.00983102	0.109983
MD07G1013100	GO:0005634(nucleus);GO:0008270(zinc ion binding)	NA	NA	NA	PREDICTED: uncharacterized protein LOC103945892 isoform X1 [Pyrus x bretschneideri]	6.90165	21.4398	3.10647	1.63528	0.0201969	0.176657
MD07G1016200	GO:0005515(protein binding);GO:0005524(ATP binding);GO:0005576(extracellular region);GO:0006952(defense response);GO:0043531(ADP binding)	04626(Plant-pathogen interaction)	K13457	NA	PREDICTED: putative disease resistance protein RGA3 [Malus domestica]	0.810022	2.28525	2.82122	1.49632	0.0410874	0.273153
MD07G1035300	GO:0005509(calcium ion binding);GO:0005544(calcium-dependent phospholipid binding);GO:0005773(vacuole);GO:0009408(response to heat);GO:0009409(response to cold);GO:0009414(response to water deprivation);GO:0009507(chloroplast);GO:0009651(response to salt stress);GO:0009986(cell surface)	NA	NA	NA	PREDICTED: annexin D3-like [Pyrus x bretschneideri]	1.07438	3.54627	3.30075	1.7228	0.0169982	0.157324
MD07G1036600	GO:0003674(molecular_function);GO:0005634(nucleus);GO:0006351(transcription, DNA-templated);GO:0006355(regulation of transcription, DNA-templated);GO:0008150(biological_process);GO:0048511(rhythmic process)	NA	NA	NA	PREDICTED: protein LNK2-like isoform X1 [Malus domestica]	2.71036	8.16888	3.01395	1.59166	0.024412	0.201454
MD07G1040400	GO:0003674(molecular_function);GO:0005634(nucleus);GO:0008150(biological_process)	NA	NA	NA	PREDICTED: putative disease resistance protein At3g14460 [Malus domestica]	0.440662	1.52005	3.44948	1.78638	0.0139268	0.140009
MD07G1043500	GO:0004103(choline kinase activity);GO:0005524(ATP binding);GO:0005737(cytoplasm);GO:0016310(phosphorylation)	00564(Glycerophospholipid metabolism)	K14156	EC:2.7.1.32;EC:2.7.1.82	PREDICTED: probable choline kinase 2 isoform X1 [Pyrus x bretschneideri]	0.776666	2.65423	3.41747	1.77293	0.014348	0.142737
MD07G1043900	GO:0003674(molecular_function);GO:0005634(nucleus);GO:0006351(transcription, DNA-templated);GO:0006355(regulation of transcription, DNA-templated);GO:0007623(circadian rhythm)	NA	NA	NA	PREDICTED: protein LNK3-like [Malus domestica]	1.24896	23.7089	18.9829	4.24663	2.51058e-08	4.74458e-06
MD07G1051100	GO:0004843(thiol-dependent ubiquitin-specific protease activity);GO:0005634(nucleus);GO:0005829(cytosol);GO:0006511(ubiquitin-dependent protein catabolic process);GO:0009506(plasmodesma);GO:0016579(protein deubiquitination);GO:0036459(thiol-dependent ubiquitinyl hydrolase activity)	NA	NA	NA	PREDICTED: uncharacterized protein LOC103438639 [Malus domestica]	5.03934	82.3361	16.3387	4.03022	8.32619e-08	1.26938e-05
MD07G1051200	NA	NA	NA	NA	PREDICTED: uncharacterized protein LOC103438639 [Malus domestica]	2.96327	37.8439	12.771	3.6748	1.15344e-06	0.000111762
MD07G1062200	GO:0004846(urate oxidase activity);GO:0005739(mitochondrion);GO:0005777(peroxisome);GO:0006144(purine nucleobase metabolic process);GO:0007031(peroxisome organization);GO:0019628(urate catabolic process);GO:0055114(oxidation-reduction process)	00230(Purine metabolism);00232(Caffeine metabolism)	K00365	EC:1.7.3.3	PREDICTED: uricase-2 isozyme 1-like [Malus domestica]	89.5297	488.476	5.45602	2.44785	0.000563072	0.0138312
MD07G1070400	GO:0005886(plasma membrane)	00520(Amino sugar and nucleotide sugar metabolism)	K01183	EC:3.2.1.14	PREDICTED: LEAF RUST 10 DISEASE-RESISTANCE LOCUS RECEPTOR-LIKE PROTEIN KINASE-like 2.1 [Pyrus x bretschneideri]	0.540503	2.91395	5.39118	2.4306	0.000895615	0.019589
MD07G1072900	GO:0000287(magnesium ion binding);GO:0004743(pyruvate kinase activity);GO:0005737(cytoplasm);GO:0005829(cytosol);GO:0006096(glycolytic process);GO:0016020(membrane);GO:0016301(kinase activity);GO:0030955(potassium ion binding);GO:0046686(response to cadmium ion)	01200(Carbon metabolism);01230(Biosynthesis of amino acids);00010(Glycolysis / Gluconeogenesis);00620(Pyruvate metabolism);00230(Purine metabolism)	K00873	EC:2.7.1.40	PREDICTED: pyruvate kinase 1, cytosolic-like [Pyrus x bretschneideri]	13.5976	63.5451	4.67328	2.22443	0.00165772	0.0306444
MD07G1075600	GO:0000166(nucleotide binding);GO:0005515(protein binding);GO:0005737(cytoplasm);GO:0005783(endoplasmic reticulum);GO:0005789(endoplasmic reticulum membrane);GO:0005886(plasma membrane);GO:0006817(phosphate ion transport);GO:0006888(ER to Golgi vesicle-mediated transport);GO:0015031(protein transport);GO:0016021(integral component of membrane);GO:0016036(cellular response to phosphate starvation)	04141(Protein processing in endoplasmic reticulum)	K14003	NA	PREDICTED: SEC12-like protein 1 [Malus domestica]	0.995263	3.52654	3.54333	1.8251	0.0117677	0.12515
MD07G1079300	GO:0005737(cytoplasm);GO:0006952(defense response);GO:0007165(signal transduction);GO:0016021(integral component of membrane);GO:0043531(ADP binding)	03040(Spliceosome);04141(Protein processing in endoplasmic reticulum);04144(Endocytosis)	K03283	NA	PREDICTED: disease resistance protein RML1B-like [Malus domestica]	1.09867	5.86741	5.34048	2.41697	0.000755821	0.0172894
MD07G1085500	GO:0004843(thiol-dependent ubiquitin-specific protease activity);GO:0005634(nucleus);GO:0005829(cytosol);GO:0006511(ubiquitin-dependent protein catabolic process);GO:0009506(plasmodesma);GO:0016579(protein deubiquitination);GO:0036459(thiol-dependent ubiquitinyl hydrolase activity)	NA	NA	NA	PREDICTED: MATH domain and coiled-coil domain-containing protein At3g44800-like [Malus domestica]	11.7383	35.6764	3.03931	1.60374	0.0227567	0.191739
MD07G1108300	GO:0004004(ATP-dependent RNA helicase activity);GO:0010501(RNA secondary structure unwinding)	03040(Spliceosome)	K12835	EC:3.6.4.13	PREDICTED: putative DEAD-box ATP-dependent RNA helicase 29 isoform X1 [Pyrus x bretschneideri]	15.9605	51.3206	3.21548	1.68503	0.0165736	0.154729
MD07G1108500	GO:0003677(DNA binding);GO:0005515(protein binding);GO:0005634(nucleus);GO:0008150(biological_process);GO:0010167(response to nitrate);GO:0015706(nitrate transport);GO:0071249(cellular response to nitrate);GO:0071705(nitrogen compound transport);GO:1901698(response to nitrogen compound)	NA	NA	NA	uncharacterized LOC103447875 [Malus domestica]	1.74436	4.74936	2.7227	1.44504	0.0419188	0.276038
MD07G1108600	GO:0003677(DNA binding);GO:0005515(protein binding);GO:0005634(nucleus);GO:0008150(biological_process);GO:0010167(response to nitrate);GO:0015706(nitrate transport);GO:0071249(cellular response to nitrate);GO:0071705(nitrogen compound transport);GO:1901698(response to nitrogen compound)	NA	NA	NA	uncharacterized LOC103447875 [Malus domestica]	2.11052	6.73628	3.19176	1.67435	0.0195474	0.173051
MD07G1111800	GO:0005575(cellular_component)	NA	NA	NA	PREDICTED: uncharacterized protein LOC103439025 isoform X1 [Malus domestica]	19.596	73.5354	3.75257	1.90788	0.0067755	0.0853169
MD07G1126500	GO:0003674(molecular_function);GO:0006952(defense response);GO:0016020(membrane)	NA	NA	NA	PREDICTED: BON1-associated protein 2-like [Pyrus x bretschneideri]	3.26545	13.5022	4.13488	2.04784	0.00449109	0.062812
MD07G1127900	GO:0005768(endosome);GO:0005774(vacuolar membrane);GO:0005802(trans-Golgi network);GO:0008757(S-adenosylmethionine-dependent methyltransferase activity);GO:0032259(methylation)	NA	NA	NA	PREDICTED: probable methyltransferase PMT15 [Malus domestica]	1.54314	6.76812	4.38593	2.13288	0.00277438	0.0446772
MD07G1130000	GO:0005737(cytoplasm);GO:0005783(endoplasmic reticulum);GO:0005789(endoplasmic reticulum membrane);GO:0006629(lipid metabolic process);GO:0016021(integral component of membrane);GO:0016491(oxidoreductase activity);GO:0030148(sphingolipid biosynthetic process);GO:0046872(metal ion binding);GO:0052631(sphingolipid delta-8 desaturase activity);GO:0055114(oxidation-reduction process);GO:0070417(cellu…	00910(Nitrogen metabolism)	K10534	EC:1.7.1.1;EC:1.7.1.2	PREDICTED: delta(8)-fatty-acid desaturase 1-like [Malus domestica]	1.31059	25.4399	19.411	4.2788	1.9862e-08	3.82177e-06
MD07G1139600	GO:0003677(DNA binding);GO:0005634(nucleus);GO:0006351(transcription, DNA-templated);GO:0006355(regulation of transcription, DNA-templated)	NA	NA	NA	PREDICTED: AT-hook motif nuclear-localized protein 9 [Malus domestica]	0.490803	1.45453	2.96358	1.56734	0.0333171	0.243007
MD07G1140300	GO:0005737(cytoplasm);GO:0005773(vacuole);GO:0005886(plasma membrane);GO:0008150(biological_process);GO:0009506(plasmodesma)	NA	NA	NA	PREDICTED: remorin-like [Malus domestica]	96.7827	253.895	2.62336	1.39141	0.0484073	0.299981
MD07G1143200	GO:0004842(ubiquitin-protein transferase activity);GO:0005634(nucleus);GO:0010114(response to red light);GO:0031463(Cul3-RING ubiquitin ligase complex)	NA	NA	NA	PREDICTED: BTB/POZ domain-containing protein POB1-like [Malus domestica]	39.1497	125.039	3.19386	1.6753	0.0171695	0.15844
MD07G1151000	GO:0003677(DNA binding);GO:0003700(transcription factor activity, sequence-specific DNA binding);GO:0005634(nucleus);GO:0006351(transcription, DNA-templated);GO:0006355(regulation of transcription, DNA-templated);GO:0044212(transcription regulatory region DNA binding);GO:0046983(protein dimerization activity)	04075(Plant hormone signal transduction)	K13422	NA	PREDICTED: transcription factor bHLH13 [Malus domestica]	1.58292	10.0552	6.35234	2.66729	0.000223133	0.00693258
MD07G1155800	NA	NA	NA	NA	PREDICTED: uncharacterized protein LOC103402033 [Malus domestica]	3.88905	21.8594	5.62076	2.49077	0.000527649	0.0131083
MD07G1159800	GO:0000301(retrograde transport, vesicle recycling within Golgi);GO:0006890(retrograde vesicle-mediated transport, Golgi to ER);GO:0007030(Golgi organization);GO:0017119(Golgi transport complex);GO:0048213(Golgi vesicle prefusion complex stabilization)	NA	NA	NA	PREDICTED: uncharacterized protein LOC103431948 [Malus domestica]	3.19604	12.6588	3.96078	1.98578	0.00512439	0.069378
MD07G1160900	GO:0003677(DNA binding);GO:0009295(nucleoid);GO:0009507(chloroplast);GO:0009508(plastid chromosome);GO:0009534(chloroplast thylakoid);GO:0009535(chloroplast thylakoid membrane);GO:0009579(thylakoid);GO:0009737(response to abscisic acid);GO:0009773(photosynthetic electron transport in photosystem I);GO:0009941(chloroplast envelope);GO:0016021(integral component of membrane);GO:0030093(chloroplast …	NA	NA	NA	PREDICTED: protein CURVATURE THYLAKOID 1B, chloroplastic isoform X1 [Pyrus x bretschneideri]	1.29608	23.7691	18.3392	4.19686	4.1167e-08	7.07793e-06
MD07G1164200	GO:0004519(endonuclease activity);GO:0004527(exonuclease activity);GO:0005509(calcium ion binding)	NA	NA	NA	PREDICTED: uncharacterized calcium-binding protein At1g02270-like [Malus domestica]	0.697569	10.4931	15.0424	3.91096	2.30203e-07	2.92448e-05
MD07G1170100	GO:0004368(glycerol-3-phosphate dehydrogenase activity);GO:0005739(mitochondrion);GO:0005743(mitochondrial inner membrane);GO:0006071(glycerol metabolic process);GO:0006072(glycerol-3-phosphate metabolic process);GO:0006127(glycerophosphate shuttle);GO:0009331(glycerol-3-phosphate dehydrogenase complex);GO:0019563(glycerol catabolic process);GO:0052591(sn-glycerol-3-phosphate:ubiquinone-8 oxidore…	00564(Glycerophospholipid metabolism)	K00111	EC:1.1.5.3	hypothetical protein PRUPE_ppa002830mg [Prunus persica]	0.573091	2.11618	3.69258	1.88463	0.00934245	0.106604
MD07G1170200	GO:0004368(glycerol-3-phosphate dehydrogenase activity);GO:0005739(mitochondrion);GO:0005743(mitochondrial inner membrane);GO:0006071(glycerol metabolic process);GO:0006072(glycerol-3-phosphate metabolic process);GO:0006127(glycerophosphate shuttle);GO:0009331(glycerol-3-phosphate dehydrogenase complex);GO:0019563(glycerol catabolic process);GO:0052591(sn-glycerol-3-phosphate:ubiquinone-8 oxidore…	00564(Glycerophospholipid metabolism)	K00111	EC:1.1.5.3	hypothetical protein PRUPE_ppa002830mg [Prunus persica]	0.664389	2.3391	3.52068	1.81585	0.0120824	0.1271
MD07G1173900	GO:0000977(RNA polymerase II regulatory region sequence-specific DNA binding);GO:0001085(RNA polymerase II transcription factor binding);GO:0001228(transcriptional activator activity, RNA polymerase II transcription regulatory region sequence-specific binding);GO:0003682(chromatin binding);GO:0005634(nucleus);GO:0005667(transcription factor complex);GO:0030154(cell differentiation)	NA	NA	NA	PREDICTED: GATA transcription factor 8-like [Malus domestica]	1.45253	15.2966	10.531	3.39657	4.14616e-06	0.000302908
MD07G1175900	GO:0009416(response to light stimulus);GO:0009535(chloroplast thylakoid membrane);GO:0009768(photosynthesis, light harvesting in photosystem I);GO:0009941(chloroplast envelope);GO:0010287(plastoglobule);GO:0016168(chlorophyll binding);GO:0031409(pigment binding)	00196(Photosynthesis - antenna proteins)	K08907	NA	PREDICTED: chlorophyll a-b binding protein 6, chloroplastic [Malus domestica]	10.0865	44.2682	4.38885	2.13384	0.00254502	0.0417425
MD07G1177400	GO:0005515(protein binding);GO:0016925(protein sumoylation);GO:0061665(SUMO ligase activity)	04120(Ubiquitin mediated proteolysis)	K04706	NA	PREDICTED: E3 SUMO-protein ligase SIZ1-like [Malus domestica]	2.02716	5.5378	2.7318	1.44985	0.04081	0.272349
MD07G1182300	GO:0000156(phosphorelay response regulator activity);GO:0000160(phosphorelay signal transduction system);GO:0003677(DNA binding);GO:0005634(nucleus);GO:0005739(mitochondrion);GO:0006351(transcription, DNA-templated);GO:0006355(regulation of transcription, DNA-templated);GO:0007623(circadian rhythm);GO:0009266(response to temperature stimulus);GO:0010017(red or far-red light signaling pathway);GO:…	04712(Circadian rhythm - plant)	K12129	NA	PREDICTED: two-component response regulator-like PRR73 [Malus domestica]	1.15863	12.0205	10.3748	3.37501	5.60819e-06	0.000382142
MD07G1182500	GO:0000156(phosphorelay response regulator activity);GO:0000160(phosphorelay signal transduction system);GO:0003677(DNA binding);GO:0005634(nucleus);GO:0005739(mitochondrion);GO:0006351(transcription, DNA-templated);GO:0006355(regulation of transcription, DNA-templated);GO:0007623(circadian rhythm);GO:0009266(response to temperature stimulus);GO:0010017(red or far-red light signaling pathway);GO:…	04712(Circadian rhythm - plant)	K12129	NA	PREDICTED: two-component response regulator-like PRR37 [Pyrus x bretschneideri]	3.23403	10.8176	3.34494	1.74198	0.0138556	0.139488
MD07G1194400	GO:0005634(nucleus);GO:0008152(metabolic process);GO:0016597(amino acid binding)	NA	NA	NA	PREDICTED: ACT domain-containing protein ACR9 isoform X2 [Malus domestica]	47.941	168.823	3.52148	1.81618	0.00978767	0.109682
MD07G1195500	GO:0005737(cytoplasm);GO:0031625(ubiquitin protein ligase binding);GO:0061630(ubiquitin protein ligase activity)	04141(Protein processing in endoplasmic reticulum);04120(Ubiquitin mediated proteolysis)	K10575	EC:2.3.2.23	PREDICTED: ubiquitin-conjugating enzyme E2 7-like, partial [Pyrus x bretschneideri]	6.45998	23.5427	3.6444	1.86568	0.00842755	0.0997995
MD07G1198900	GO:0003674(molecular_function);GO:0005634(nucleus);GO:0008150(biological_process)	NA	NA	NA	PREDICTED: uncharacterized protein LOC103435083 [Malus domestica]	4.01922	11.2197	2.79151	1.48105	0.0364704	0.256606
MD07G1204800	GO:0003824(catalytic activity);GO:0005768(endosome);GO:0005794(Golgi apparatus);GO:0005802(trans-Golgi network);GO:0008150(biological_process);GO:0016020(membrane);GO:0016740(transferase activity)	00790(Folate biosynthesis)	K01930	EC:6.3.2.17	PREDICTED: probable glycosyltransferase At5g03795 [Pyrus x bretschneideri]	1.14014	3.30143	2.89564	1.53388	0.0362741	0.255539
MD07G1206400	GO:0004252(serine-type endopeptidase activity);GO:0005618(cell wall)	04144(Endocytosis)	K18443	NA	PREDICTED: cucumisin-like isoform X1 [Malus domestica]	2.6128	11.2816	4.31782	2.1103	0.00297683	0.046933
MD07G1211200	GO:0005634(nucleus);GO:0008270(zinc ion binding);GO:0016021(integral component of membrane)	NA	NA	NA	PREDICTED: uncharacterized protein LOC103942995, partial [Pyrus x bretschneideri]	2.32542	10.3773	4.46256	2.15787	0.00257008	0.0420687
MD07G1214900	GO:0003674(molecular_function);GO:0008150(biological_process);GO:0009507(chloroplast);GO:0016021(integral component of membrane)	NA	NA	NA	PREDICTED: uncharacterized protein LOC103455105 [Malus domestica]	1.78737	4.931	2.7588	1.46404	0.0446859	0.286562
MD07G1219100	GO:0004674(protein serine/threonine kinase activity);GO:0005524(ATP binding);GO:0005886(plasma membrane);GO:0006468(protein phosphorylation);GO:0007169(transmembrane receptor protein tyrosine kinase signaling pathway);GO:0009507(chloroplast);GO:0016021(integral component of membrane);GO:0016301(kinase activity)	04626(Plant-pathogen interaction)	K13428	EC:2.7.11.1	PREDICTED: probable LRR receptor-like serine/threonine-protein kinase At3g47570 [Malus domestica]	0.528133	2.33708	4.42517	2.14573	0.00306214	0.0479027
MD07G1219600	GO:0005515(protein binding)	04626(Plant-pathogen interaction)	K13428	EC:2.7.11.1	PREDICTED: putative receptor-like protein kinase At3g47110 [Malus domestica]	0.906914	3.83669	4.23049	2.08083	0.00366368	0.0542249
MD07G1220300	GO:0004057(arginyltransferase activity);GO:0005737(cytoplasm);GO:0016598(protein arginylation)	NA	NA	NA	PREDICTED: arginyl-tRNA--protein transferase 2-like [Malus domestica]	8.58238	22.6434	2.63836	1.39964	0.0474541	0.296927
MD07G1221900	GO:0004435(phosphatidylinositol phospholipase C activity);GO:0004629(phospholipase C activity);GO:0004871(signal transducer activity);GO:0005886(plasma membrane);GO:0007165(signal transduction);GO:0009553(embryo sac development);GO:0009556(microsporogenesis);GO:0010601(positive regulation of auxin biosynthetic process);GO:0016042(lipid catabolic process);GO:0035556(intracellular signal transducti…	00562(Inositol phosphate metabolism)	K19006	EC:3.1.4.11	PREDICTED: phosphoinositide phospholipase C 2-like isoform X2 [Malus domestica]	2.23494	15.4785	6.92569	2.79196	0.000108696	0.00402843
MD07G1223100	GO:0006629(lipid metabolic process);GO:0006633(fatty acid biosynthetic process);GO:0006636(unsaturated fatty acid biosynthetic process);GO:0009266(response to temperature stimulus);GO:0009507(chloroplast);GO:0009941(chloroplast envelope);GO:0016021(integral component of membrane);GO:0016717(oxidoreductase activity, acting on paired donors, with oxidation of a pair of donors resulting in the reduc…	01212(Fatty acid metabolism);01040(Biosynthesis of unsaturated fatty acids)	K10256	EC:1.14.19.6;EC:1.14.19.22	omega-3 fatty acid desaturase, chloroplastic [Malus domestica]	0.926116	10.137	10.9457	3.45229	3.38418e-06	0.00025456
MD07G1230400	GO:0003735(structural constituent of ribosome);GO:0006412(translation)	NA	NA	NA	PREDICTED: mitochondrial dicarboxylate/tricarboxylate transporter DTC-like [Malus domestica]	0.791264	2.89947	3.66435	1.87356	0.0100814	0.111899
MD07G1230600	GO:0005215(transporter activity);GO:0005886(plasma membrane);GO:0006810(transport);GO:0006857(oligopeptide transport);GO:0009624(response to nematode);GO:0016020(membrane);GO:0016021(integral component of membrane)	NA	NA	NA	PREDICTED: protein NRT1/ PTR FAMILY 5.1 [Malus domestica]	4.47791	153.225	34.218	5.09668	8.99485e-11	3.79942e-08
MD07G1233300	GO:0010200(response to chitin);GO:0043161(proteasome-mediated ubiquitin-dependent protein catabolic process);GO:0061630(ubiquitin protein ligase activity)	NA	NA	NA	PREDICTED: RING-H2 finger protein ATL74 [Malus domestica]	2.62533	12.4612	4.74654	2.24688	0.00190851	0.0337786
MD07G1235900	GO:0005515(protein binding)	04626(Plant-pathogen interaction)	K13420	EC:2.7.11.1	PREDICTED: probable LRR receptor-like serine/threonine-protein kinase At3g47570 [Pyrus x bretschneideri]	1.04583	2.85217	2.72719	1.44741	0.0428955	0.279059
MD07G1248600	GO:0003677(DNA binding);GO:0003700(transcription factor activity, sequence-specific DNA binding);GO:0005634(nucleus);GO:0006351(transcription, DNA-templated);GO:0006355(regulation of transcription, DNA-templated);GO:0009873(ethylene-activated signaling pathway);GO:0010200(response to chitin)	00970(Aminoacyl-tRNA biosynthesis)	K01876	EC:6.1.1.12	ethylene-responsive transcription factor ERF105 [Malus domestica]	14.4065	174.907	12.1408	3.6018	1.04354e-06	0.000102857
MD07G1248700	GO:0000976(transcription regulatory region sequence-specific DNA binding);GO:0003677(DNA binding);GO:0003700(transcription factor activity, sequence-specific DNA binding);GO:0005634(nucleus);GO:0006351(transcription, DNA-templated);GO:0006355(regulation of transcription, DNA-templated);GO:0009414(response to water deprivation);GO:0009873(ethylene-activated signaling pathway);GO:0044212(transcript…	04075(Plant hormone signal transduction)	K14517	NA	ethylene-responsive transcription factor ERF106-like [Malus domestica]	7.20856	298.782	41.4483	5.37324	1.56221e-11	8.1189e-09
MD07G1251200	GO:0000166(nucleotide binding);GO:0002230(positive regulation of defense response to virus by host);GO:0002239(response to oomycetes);GO:0005515(protein binding);GO:0005524(ATP binding);GO:0005886(plasma membrane);GO:0006952(defense response);GO:0009416(response to light stimulus);GO:0009611(response to wounding);GO:0009626(plant-type hypersensitive response);GO:0009637(response to blue light);GO…	04626(Plant-pathogen interaction)	K13457	NA	PREDICTED: disease resistance protein RPP8-like [Malus domestica]	0.806843	4.62833	5.73634	2.52013	0.000475154	0.0121809
MD07G1251300	GO:0000166(nucleotide binding);GO:0000398(mRNA splicing, via spliceosome);GO:0005515(protein binding);GO:0005634(nucleus);GO:0008270(zinc ion binding);GO:0008380(RNA splicing);GO:0045131(pre-mRNA branch point binding)	03013(RNA transport);03015(mRNA surveillance pathway);03018(RNA degradation)	K13126	NA	PREDICTED: branchpoint-bridging protein-like [Malus domestica]	8.00652	32.1391	4.01411	2.00508	0.00443559	0.0622261
MD07G1253100	GO:0003674(molecular_function);GO:0005886(plasma membrane);GO:0008150(biological_process);GO:0016021(integral component of membrane)	NA	NA	NA	PREDICTED: cell number regulator 6-like [Malus domestica]	5.01435	16.0067	3.19218	1.67454	0.0177553	0.162015
MD07G1256700	GO:0003674(molecular_function);GO:0005576(extracellular region);GO:0005615(extracellular space);GO:0009505(plant-type cell wall);GO:0009506(plasmodesma);GO:0048046(apoplast);GO:0080167(response to karrikin)	NA	NA	NA	PREDICTED: protein EXORDIUM-like 3 [Malus domestica]	1.30808	7.62528	5.82936	2.54334	0.000466758	0.0120603
MD07G1262500	GO:0004683(calmodulin-dependent protein kinase activity);GO:0005516(calmodulin binding);GO:0005634(nucleus);GO:0005737(cytoplasm);GO:0005886(plasma membrane);GO:0009738(abscisic acid-activated signaling pathway);GO:0009931(calcium-dependent protein serine/threonine kinase activity);GO:0018105(peptidyl-serine phosphorylation);GO:0035556(intracellular signal transduction);GO:0046777(protein autopho…	04626(Plant-pathogen interaction)	K13412	EC:2.7.11.1	PREDICTED: calcium-dependent protein kinase 26-like isoform X1 [Malus domestica]	5.15291	15.6857	3.04405	1.60599	0.0227207	0.191576
MD07G1262700	GO:0003674(molecular_function);GO:0005886(plasma membrane);GO:0008150(biological_process);GO:0016021(integral component of membrane)	NA	NA	NA	PREDICTED: post-GPI attachment to proteins factor 3-like [Malus domestica]	1.79529	7.9472	4.4267	2.14623	0.0026354	0.0428618
MD07G1264300	GO:0005739(mitochondrion);GO:0051087(chaperone binding)	NA	NA	NA	PREDICTED: BAG family molecular chaperone regulator 1-like [Malus domestica]	5.70224	18.8252	3.30137	1.72306	0.014575	0.144217
MD07G1266700	NA	NA	NA	NA	PREDICTED: uncharacterized protein LOC103439733 isoform X1 [Malus domestica]	1.23078	5.21055	4.23353	2.08186	0.00408103	0.0587692
MD07G1275200	GO:0005215(transporter activity);GO:0016021(integral component of membrane);GO:0098656(anion transmembrane transport)	NA	NA	NA	PREDICTED: putative transporter arsB isoform X1 [Pyrus x bretschneideri]	2.66887	8.08541	3.02953	1.59909	0.0259159	0.208449
MD07G1275600	GO:0005215(transporter activity);GO:0016021(integral component of membrane);GO:0098656(anion transmembrane transport)	NA	NA	NA	PREDICTED: putative transporter arsB isoform X2 [Pyrus x bretschneideri]	1.11014	7.223	6.50638	2.70185	0.00021034	0.00662512
MD07G1278300	GO:0004674(protein serine/threonine kinase activity);GO:0005524(ATP binding);GO:0005886(plasma membrane);GO:0006468(protein phosphorylation);GO:0009506(plasmodesma);GO:0016021(integral component of membrane);GO:0016301(kinase activity)	04626(Plant-pathogen interaction)	K13430	EC:2.7.11.1	PREDICTED: probable receptor-like protein kinase At5g24010 [Malus domestica]	1.03612	4.19141	4.04529	2.01624	0.00462756	0.0641713
MD07G1283500	GO:0000139(Golgi membrane);GO:0005768(endosome);GO:0005794(Golgi apparatus);GO:0005802(trans-Golgi network);GO:0006486(protein glycosylation);GO:0016021(integral component of membrane);GO:0016757(transferase activity, transferring glycosyl groups);GO:0016758(transferase activity, transferring hexosyl groups)	NA	NA	NA	PREDICTED: hydroxyproline O-galactosyltransferase HPGT1 isoform X1 [Malus domestica]	1.0386	4.18149	4.02607	2.00937	0.00519934	0.0701022
MD07G1290500	GO:0005737(cytoplasm);GO:0006537(glutamate biosynthetic process);GO:0015930(glutamate synthase activity);GO:0019676(ammonia assimilation cycle)	01230(Biosynthesis of amino acids);00910(Nitrogen metabolism);00250(Alanine, aspartate and glutamate metabolism)	K00264	EC:1.4.1.13;EC:1.4.1.14	PREDICTED: glutamate synthase [NADH], amyloplastic-like isoform X1 [Malus domestica]	3.59165	15.7317	4.38009	2.13096	0.00254467	0.0417425
MD07G1291100	GO:0004766(spermidine synthase activity);GO:0006596(polyamine biosynthetic process)	00270(Cysteine and methionine metabolism);00330(Arginine and proline metabolism);00410(beta-Alanine metabolism);00480(Glutathione metabolism)	K00797	EC:2.5.1.16	spermine synthase-like [Pyrus x bretschneideri]	1.37607	7.32228	5.32115	2.41174	0.00079931	0.0178895
MD07G1293600	GO:0005739(mitochondrion);GO:0006412(translation)	03010(Ribosome)	K02939	NA	PREDICTED: 50S ribosomal protein L9 [Malus domestica]	7.14472	20.2922	2.84017	1.50598	0.0333523	0.243007
MD07G1295600	GO:0005737(cytoplasm);GO:0005886(plasma membrane);GO:0006857(oligopeptide transport);GO:0015031(protein transport);GO:0015198(oligopeptide transporter activity);GO:0015833(peptide transport);GO:0016020(membrane);GO:0016021(integral component of membrane);GO:0055085(transmembrane transport)	NA	NA	NA	PREDICTED: oligopeptide transporter 6 [Malus domestica]	0.525539	1.86762	3.55372	1.82933	0.011792	0.12515
MD07G1295900	GO:0005768(endosome);GO:0005794(Golgi apparatus);GO:0005802(trans-Golgi network);GO:0005886(plasma membrane);GO:0015098(molybdate ion transmembrane transporter activity);GO:0015689(molybdate ion transport);GO:0016021(integral component of membrane)	NA	NA	NA	PREDICTED: molybdate-anion transporter [Malus domestica]	3.20252	10.4533	3.2641	1.70669	0.0160947	0.151798
MD07G1297400	GO:0003674(molecular_function);GO:0009733(response to auxin)	04075(Plant hormone signal transduction)	K14488	NA	PREDICTED: auxin-responsive protein SAUR32 [Malus domestica]	6.10245	21.2672	3.48503	1.80117	0.0117486	0.12515
MD07G1299100	GO:0000156(phosphorelay response regulator activity);GO:0000160(phosphorelay signal transduction system);GO:0003677(DNA binding);GO:0005515(protein binding);GO:0005634(nucleus);GO:0006351(transcription, DNA-templated);GO:0006355(regulation of transcription, DNA-templated);GO:0007623(circadian rhythm);GO:0009266(response to temperature stimulus);GO:0010017(red or far-red light signaling pathway);G…	04712(Circadian rhythm - plant)	K12130	NA	PREDICTED: two-component response regulator-like APRR5 [Malus domestica]	3.38364	19.8706	5.87255	2.55399	0.000352165	0.00979679
MD07G1305700	GO:0005737(cytoplasm);GO:0005975(carbohydrate metabolic process);GO:0016301(kinase activity);GO:0016310(phosphorylation)	01200(Carbon metabolism);00030(Pentose phosphate pathway)	K00851	EC:2.7.1.12	PREDICTED: probable gluconokinase [Malus domestica]	4.73298	17.5661	3.71142	1.89197	0.00767696	0.0934774
MD07G1306900	GO:0009813(flavonoid biosynthetic process);GO:0043231(intracellular membrane-bounded organelle);GO:0052696(flavonoid glucuronidation);GO:0080043(quercetin 3-O-glucosyltransferase activity);GO:0080044(quercetin 7-O-glucosyltransferase activity)	00942(Anthocyanin biosynthesis)	K12930	EC:2.4.1.115	PREDICTED: anthocyanidin 3-O-glucosyltransferase 2-like [Malus domestica]	3.74363	24.3476	6.50374	2.70127	0.000166977	0.00557412
MD07G1311200	GO:0003735(structural constituent of ribosome);GO:0005763(mitochondrial small ribosomal subunit);GO:0006412(translation);GO:0022627(cytosolic small ribosomal subunit)	03010(Ribosome)	K02988	NA	PREDICTED: uncharacterized protein LOC103951474 [Pyrus x bretschneideri]	3.97164	11.7822	2.96658	1.5688	0.0271409	0.213789
MD08G1001200	GO:0005886(plasma membrane);GO:0006810(transport);GO:0022857(transmembrane transporter activity)	01200(Carbon metabolism);01230(Biosynthesis of amino acids);00010(Glycolysis / Gluconeogenesis);00030(Pentose phosphate pathway);00051(Fructose and mannose metabolism);00710(Carbon fixation in photosynthetic organisms)	K01623	EC:4.1.2.13	PREDICTED: WAT1-related protein At4g19185-like [Malus domestica]	18.341	48.1384	2.62464	1.39212	0.0484912	0.300364
MD08G1002700	GO:0005768(endosome);GO:0005794(Golgi apparatus);GO:0005802(trans-Golgi network);GO:0008150(biological_process);GO:0016757(transferase activity, transferring glycosyl groups)	00561(Glycerolipid metabolism);00564(Glycerophospholipid metabolism)	K13506	EC:2.3.1.15	PREDICTED: uncharacterized protein At1g04910-like [Malus domestica]	5.76955	18.2913	3.17032	1.66463	0.0181322	0.164245
MD08G1005500	GO:0004252(serine-type endopeptidase activity);GO:0005737(cytoplasm);GO:0006508(proteolysis)	NA	NA	NA	PREDICTED: prolyl endopeptidase [Malus domestica]	5.10538	58.1382	11.3877	3.5094	1.8019e-06	0.000152607
MD08G1006600	GO:0004364(glutathione transferase activity);GO:0005737(cytoplasm);GO:0006749(glutathione metabolic process)	00480(Glutathione metabolism)	K00799	EC:2.5.1.18	hypothetical protein PRUPE_ppa011153mg [Prunus persica]	1.90688	5.70045	2.98941	1.57986	0.027094	0.213589
MD08G1007500	GO:0000103(sulfate assimilation);GO:0005737(cytoplasm);GO:0006457(protein folding);GO:0015035(protein disulfide oxidoreductase activity);GO:0016671(oxidoreductase activity, acting on a sulfur group of donors, disulfide as acceptor);GO:0034599(cellular response to oxidative stress);GO:0045454(cell redox homeostasis);GO:0055114(oxidation-reduction process)	NA	NA	NA	PREDICTED: thioredoxin-like protein CDSP32, chloroplastic [Malus domestica]	2.01023	32.4367	16.1359	4.0122	1.23901e-07	1.74891e-05
MD08G1011100	GO:0003674(molecular_function);GO:0005576(extracellular region);GO:0008150(biological_process);GO:0016021(integral component of membrane)	NA	NA	NA	PREDICTED: uncharacterized protein LOC103428593 [Malus domestica]	6.5282	137.262	21.026	4.39411	1.01931e-08	2.1384e-06
MD08G1011600	GO:0003674(molecular_function);GO:0005576(extracellular region);GO:0031225(anchored component of membrane);GO:0051707(response to other organism)	NA	NA	NA	PREDICTED: thaumatin-like protein 1b [Malus domestica]	3.10437	18.8124	6.05997	2.59931	0.000297391	0.00866297
MD08G1011700	GO:0003674(molecular_function);GO:0005576(extracellular region);GO:0031225(anchored component of membrane);GO:0051707(response to other organism)	NA	NA	NA	PREDICTED: thaumatin-like protein 1b [Malus domestica]	3.04108	18.8226	6.18944	2.62981	0.000329122	0.00932793
MD08G1011900	GO:0003674(molecular_function);GO:0005576(extracellular region);GO:0031225(anchored component of membrane);GO:0051707(response to other organism)	NA	NA	NA	PREDICTED: thaumatin-like protein 1b [Malus domestica]	1.26401	7.0047	5.54166	2.47032	0.000666571	0.0157626
MD08G1012800	GO:0003924(GTPase activity);GO:0005198(structural molecule activity);GO:0005200(structural constituent of cytoskeleton);GO:0005525(GTP binding);GO:0005737(cytoplasm);GO:0005773(vacuole);GO:0005874(microtubule);GO:0007017(microtubule-based process);GO:0009416(response to light stimulus);GO:0009826(unidimensional cell growth)	04145(Phagosome)	K07375	NA	PREDICTED: tubulin beta chain [Malus domestica]	2.97212	79.854	26.8677	4.7478	9.22774e-10	2.81348e-07
MD08G1013000	GO:0003674(molecular_function);GO:0005634(nucleus);GO:0008150(biological_process)	NA	NA	NA	PREDICTED: transcriptional regulator ATRX homolog [Malus domestica]	1.34705	3.79195	2.81501	1.49314	0.0396195	0.268256
MD08G1013300	GO:0003674(molecular_function);GO:0005634(nucleus);GO:0008150(biological_process)	NA	NA	NA	PREDICTED: uncharacterized protein LOC103927813 isoform X2 [Pyrus x bretschneideri]	0.560581	1.71704	3.06297	1.61493	0.0249172	0.203933
MD08G1032200	GO:0005778(peroxisomal membrane);GO:0016559(peroxisome fission);GO:0044375(regulation of peroxisome size)	04146(Peroxisome)	K13352	NA	PREDICTED: peroxisomal membrane protein 11A-like [Malus domestica]	3.42136	11.6008	3.39069	1.76158	0.0128383	0.13236
MD08G1032600	GO:0000139(Golgi membrane);GO:0005768(endosome);GO:0005794(Golgi apparatus);GO:0005802(trans-Golgi network);GO:0016021(integral component of membrane);GO:0016757(transferase activity, transferring glycosyl groups);GO:0071555(cell wall organization);GO:0080147(root hair cell development)	NA	NA	NA	PREDICTED: arabinosyltransferase RRA3-like [Malus domestica]	0.968306	4.05465	4.18736	2.06604	0.00407937	0.0587692
MD08G1032800	GO:0004497(monooxygenase activity)	00905(Brassinosteroid biosynthesis)	K15639	EC:1.14.-.-	PREDICTED: cytochrome P450 734A1-like [Malus domestica]	0.791407	4.87636	6.16163	2.62331	0.000318926	0.00910472
MD08G1033000	GO:0004497(monooxygenase activity)	00905(Brassinosteroid biosynthesis)	K15639	EC:1.14.-.-	PREDICTED: cytochrome P450 734A1-like [Malus domestica]	3.30387	8.86478	2.68315	1.42393	0.0447563	0.286855
MD08G1033100	GO:0003676(nucleic acid binding);GO:0003677(DNA binding);GO:0003700(transcription factor activity, sequence-specific DNA binding);GO:0005634(nucleus);GO:0006351(transcription, DNA-templated);GO:0006355(regulation of transcription, DNA-templated);GO:0008270(zinc ion binding);GO:0046872(metal ion binding)	00052(Galactose metabolism);00600(Sphingolipid metabolism);00531(Glycosaminoglycan degradation);00604(Glycosphingolipid biosynthesis - ganglio series);00511(Other glycan degradation)	K12309	EC:3.2.1.23	PREDICTED: protein indeterminate-domain 2-like [Pyrus x bretschneideri]	6.73515	24.7938	3.68126	1.8802	0.00764034	0.0932293
MD08G1033400	GO:0005576(extracellular region);GO:0005783(endoplasmic reticulum);GO:0016021(integral component of membrane)	NA	NA	NA	PREDICTED: uncharacterized membrane protein At1g75140-like [Malus domestica]	3.01755	7.97892	2.64417	1.40282	0.0487753	0.300876
MD08G1033600	GO:0003674(molecular_function);GO:0005739(mitochondrion);GO:0006811(ion transport);GO:0009507(chloroplast);GO:0009536(plastid);GO:0009941(chloroplast envelope)	NA	NA	NA	PREDICTED: outer envelope pore protein 24B, chloroplastic-like, partial [Malus domestica]	20.627	56.535	2.74082	1.45461	0.0391897	0.266236
MD08G1034200	GO:0003674(molecular_function);GO:0008150(biological_process);GO:0016021(integral component of membrane)	00040(Pentose and glucuronate interconversions);00500(Starch and sucrose metabolism)	K01051	EC:3.1.1.11	PREDICTED: uncharacterized protein LOC103955427 [Pyrus x bretschneideri]	11.7751	52.4751	4.45647	2.1559	0.00228739	0.0388602
MD08G1036500	GO:0003841(1-acylglycerol-3-phosphate O-acyltransferase activity);GO:0016021(integral component of membrane);GO:0016024(CDP-diacylglycerol biosynthetic process);GO:0016746(transferase activity, transferring acyl groups)	00561(Glycerolipid metabolism);00564(Glycerophospholipid metabolism)	K13513	EC:2.3.1.-;EC:2.3.1.51	PREDICTED: probable 1-acyl-sn-glycerol-3-phosphate acyltransferase 4 isoform X1 [Malus domestica]	0.762443	3.24273	4.25308	2.08851	0.00386423	0.0564623
MD08G1037600	GO:0006855(drug transmembrane transport);GO:0015238(drug transmembrane transporter activity)	NA	NA	NA	PREDICTED: protein DETOXIFICATION 33-like [Malus domestica]	9.52832	28.9791	3.04137	1.60472	0.0226973	0.19152
MD08G1037800	NA	NA	NA	NA	-	15.4566	42.3834	2.74208	1.45527	0.0388943	0.265175
MD08G1045100	GO:0005515(protein binding);GO:0005524(ATP binding);GO:0005576(extracellular region);GO:0006952(defense response);GO:0043531(ADP binding)	03040(Spliceosome)	K12818	EC:3.6.4.13	PREDICTED: putative disease resistance protein RGA1 [Pyrus x bretschneideri]	0.413234	1.52934	3.70091	1.88788	0.00939906	0.107089
MD08G1052300	GO:0003674(molecular_function);GO:0005634(nucleus);GO:0008150(biological_process)	NA	NA	NA	PREDICTED: VQ motif-containing protein 11-like [Malus domestica]	2.61616	11.7941	4.50815	2.17254	0.00270214	0.0437606
MD08G1055600	GO:0004722(protein serine/threonine phosphatase activity);GO:0005634(nucleus);GO:0005886(plasma membrane);GO:0006470(protein dephosphorylation);GO:0046872(metal ion binding)	NA	NA	NA	PREDICTED: LOW QUALITY PROTEIN: probable protein phosphatase 2C 60 [Malus domestica]	15.8217	49.771	3.14574	1.6534	0.0188027	0.168547
MD08G1059500	GO:0003674(molecular_function);GO:0005886(plasma membrane);GO:0008150(biological_process);GO:0009507(chloroplast)	NA	NA	NA	PREDICTED: uncharacterized protein LOC103440754 [Malus domestica]	1.22383	5.05515	4.13059	2.04635	0.00493994	0.0672791
MD08G1065200	GO:0003674(molecular_function);GO:0005886(plasma membrane);GO:0008150(biological_process)	NA	NA	NA	PREDICTED: uncharacterized protein LOC103410594 [Malus domestica]	16.4798	46.7715	2.83811	1.50493	0.033922	0.245706
MD08G1088100	GO:0005634(nucleus);GO:0005737(cytoplasm);GO:0008757(S-adenosylmethionine-dependent methyltransferase activity);GO:0046498(S-adenosylhomocysteine metabolic process);GO:0046500(S-adenosylmethionine metabolic process)	NA	NA	NA	PREDICTED: protein arginine N-methyltransferase 2 [Malus domestica]	3.68565	15.1666	4.11505	2.04091	0.0040838	0.0587692
MD08G1091700	GO:0005515(protein binding);GO:0005634(nucleus);GO:0009740(gibberellic acid mediated signaling pathway);GO:0009845(seed germination);GO:0009939(positive regulation of gibberellic acid mediated signaling pathway);GO:0010162(seed dormancy process);GO:0016567(protein ubiquitination);GO:0019005(SCF ubiquitin ligase complex)	04075(Plant hormone signal transduction)	K14495	NA	PREDICTED: uncharacterized protein LOC103441251 [Malus domestica]	19.8617	86.8135	4.3709	2.12793	0.00262118	0.0427217
MD08G1092400	NA	NA	NA	NA	hypothetical protein PRUPE_ppa014020mg [Prunus persica]	88.6224	232.122	2.61923	1.38914	0.0488167	0.300887
MD08G1092900	GO:0004693(cyclin-dependent protein serine/threonine kinase activity);GO:0005515(protein binding);GO:0005634(nucleus);GO:0007049(cell cycle);GO:0042127(regulation of cell proliferation);GO:0048316(seed development);GO:0051301(cell division);GO:0051726(regulation of cell cycle)	04075(Plant hormone signal transduction)	K14505	NA	PREDICTED: cyclin-D3-1-like [Pyrus x bretschneideri]	3.71502	15.9855	4.30294	2.10532	0.00297808	0.046933
MD08G1096700	GO:0003677(DNA binding);GO:0003700(transcription factor activity, sequence-specific DNA binding);GO:0005634(nucleus);GO:0006351(transcription, DNA-templated);GO:0006355(regulation of transcription, DNA-templated)	03013(RNA transport);03015(mRNA surveillance pathway);03018(RNA degradation)	K13126	NA	PREDICTED: LOW QUALITY PROTEIN: NAC domain-containing protein 72-like [Malus domestica]	0.721865	3.37537	4.6759	2.22524	0.00232917	0.0393943
MD08G1097700	GO:0005509(calcium ion binding);GO:0005739(mitochondrion);GO:0005773(vacuole);GO:0005774(vacuolar membrane);GO:0005783(endoplasmic reticulum);GO:0005789(endoplasmic reticulum membrane);GO:0005794(Golgi apparatus);GO:0005886(plasma membrane);GO:0006457(protein folding);GO:0009505(plant-type cell wall);GO:0009506(plasmodesma);GO:0009507(chloroplast);GO:0016020(membrane);GO:0016021(integral componen…	04141(Protein processing in endoplasmic reticulum);04145(Phagosome)	K08054	NA	PREDICTED: calnexin homolog 1-like [Malus domestica]	9.16637	31.487	3.43506	1.78033	0.0117932	0.12515
MD08G1098900	GO:0003674(molecular_function);GO:0005634(nucleus);GO:0005886(plasma membrane);GO:0008150(biological_process)	NA	NA	NA	PREDICTED: uncharacterized protein LOC103441113 isoform X2 [Malus domestica]	1.90543	8.87694	4.65875	2.21994	0.00188834	0.0335949
MD08G1099900	GO:0005515(protein binding);GO:0005524(ATP binding);GO:0005576(extracellular region);GO:0006952(defense response);GO:0043531(ADP binding)	04626(Plant-pathogen interaction)	K13457	NA	PREDICTED: putative disease resistance protein RGA3 [Malus domestica]	1.92838	5.83059	3.02357	1.59626	0.0243946	0.201454
MD08G1101700	GO:0004556(alpha-amylase activity);GO:0005509(calcium ion binding);GO:0005576(extracellular region);GO:0005975(carbohydrate metabolic process);GO:0009737(response to abscisic acid);GO:0009739(response to gibberellin);GO:0048046(apoplast)	00500(Starch and sucrose metabolism)	K01176	EC:3.2.1.1	PREDICTED: alpha-amylase-like [Pyrus x bretschneideri]	2.11448	8.49161	4.01594	2.00574	0.00486644	0.0664761
MD08G1103200	GO:0003674(molecular_function);GO:0005634(nucleus);GO:0005777(peroxisome);GO:0008150(biological_process)	00900(Terpenoid backbone biosynthesis);00909(Sesquiterpenoid and triterpenoid biosynthesis)	K15891	EC:1.1.1.216	PREDICTED: uncharacterized protein LOC103441128 [Malus domestica]	14.7611	49.5877	3.35935	1.74818	0.0129692	0.133288
MD08G1106300	GO:0000166(nucleotide binding);GO:0003723(RNA binding);GO:0005634(nucleus);GO:0005737(cytoplasm);GO:0006397(mRNA processing);GO:0008143(poly(A) binding);GO:0009507(chloroplast)	03013(RNA transport)	K03231	NA	PREDICTED: polyadenylate-binding protein RBP47-like isoform X1 [Pyrus x bretschneideri]	6.36423	23.6024	3.7086	1.89087	0.00733381	0.0905031
MD08G1106800	GO:0005739(mitochondrion)	NA	NA	NA	PREDICTED: uncharacterized protein LOC103959537 isoform X1 [Pyrus x bretschneideri]	0.607983	3.02244	4.97126	2.31361	0.00145416	0.0280775
MD08G1108600	GO:0001053(plastid sigma factor activity);GO:0003677(DNA binding);GO:0003700(transcription factor activity, sequence-specific DNA binding);GO:0003899(DNA-directed RNA polymerase activity);GO:0006352(DNA-templated transcription, initiation);GO:0006355(regulation of transcription, DNA-templated);GO:0009507(chloroplast);GO:0016987(sigma factor activity);GO:0019685(photosynthesis, dark reaction);GO:0…	00970(Aminoacyl-tRNA biosynthesis)	K01872	EC:6.1.1.7	PREDICTED: RNA polymerase sigma factor sigC-like [Malus domestica]	1.06847	3.62628	3.39391	1.76295	0.0138058	0.139135
MD08G1109900	NA	NA	NA	NA	PREDICTED: uncharacterized protein LOC103936352 [Pyrus x bretschneideri]	2.18229	7.10715	3.25673	1.70343	0.0182143	0.164888
MD08G1110000	GO:0003674(molecular_function);GO:0005739(mitochondrion);GO:0016021(integral component of membrane)	NA	NA	NA	PREDICTED: early nodulin-93-like [Malus domestica]	28.9046	94.4594	3.26797	1.70839	0.0151668	0.147835
MD08G1115600	GO:0006631(fatty acid metabolic process);GO:0006979(response to oxidative stress);GO:0009266(response to temperature stimulus);GO:0009507(chloroplast);GO:0009534(chloroplast thylakoid);GO:0009644(response to high light intensity);GO:0009706(chloroplast inner membrane);GO:0009915(phloem sucrose loading);GO:0009941(chloroplast envelope);GO:0009976(tocopherol cyclase activity);GO:0010189(vitamin E b…	00130(Ubiquinone and other terpenoid-quinone biosynthesis)	K09834	EC:5.5.1.24	PREDICTED: tocopherol cyclase, chloroplastic-like [Malus domestica]	0.489553	4.50006	9.19218	3.20041	1.62611e-05	0.000900344
MD08G1117500	GO:0004069(L-aspartate:2-oxoglutarate aminotransferase activity);GO:0030170(pyridoxal phosphate binding);GO:0042802(identical protein binding)	01200(Carbon metabolism);01210(2-Oxocarboxylic acid metabolism);01230(Biosynthesis of amino acids);00710(Carbon fixation in photosynthetic organisms);00250(Alanine, aspartate and glutamate metabolism);00270(Cysteine and methionine metabolism);00220(Arginine biosynthesis);00330(Arginine and proline metabolism);00350(Tyrosine metabolism);00360(Phenylalanine metabolism);00400(Phenylalanine, tyrosine…	K14454	EC:2.6.1.1	PREDICTED: aspartate aminotransferase, cytoplasmic [Malus domestica]	37.5006	211.039	5.62762	2.49253	0.000453482	0.0118376
MD08G1121300	GO:0003677(DNA binding);GO:0003700(transcription factor activity, sequence-specific DNA binding);GO:0005634(nucleus);GO:0006351(transcription, DNA-templated);GO:0006355(regulation of transcription, DNA-templated);GO:0007275(multicellular organism development)	03018(RNA degradation)	K12581	NA	PREDICTED: NAC domain-containing protein 100-like isoform X2 [Malus domestica]	1.51145	4.27431	2.82795	1.49975	0.0368206	0.257722
MD08G1121600	GO:0045431(flavonol synthase activity)	00941(Flavonoid biosynthesis)	K05278	EC:1.14.11.23	PREDICTED: flavonol synthase/flavanone 3-hydroxylase [Pyrus x bretschneideri]	7.67863	25.824	3.36309	1.74979	0.0131998	0.134931
MD08G1124700	GO:0003674(molecular_function);GO:0005737(cytoplasm);GO:0008150(biological_process)	NA	NA	NA	PREDICTED: putative glutathione-specific gamma-glutamylcyclotransferase 2 [Malus domestica]	6.44922	32.3566	5.01714	2.32687	0.00105804	0.0221559
MD08G1132900	NA	NA	NA	NA	PREDICTED: uncharacterized protein LOC103421227 [Malus domestica]	3.83299	11.0419	2.88075	1.52644	0.0324122	0.238891
MD08G1134000	GO:0008194(UDP-glycosyltransferase activity);GO:0009813(flavonoid biosynthetic process);GO:0043231(intracellular membrane-bounded organelle);GO:0052696(flavonoid glucuronidation)	00908(Zeatin biosynthesis)	K13495	EC:2.4.1.215	PREDICTED: zeatin O-glucosyltransferase-like isoform X3 [Pyrus x bretschneideri]	3.03887	31.737	10.4437	3.38456	4.04623e-06	0.000297669
MD08G1135100	GO:0005634(nucleus);GO:0008270(zinc ion binding)	04120(Ubiquitin mediated proteolysis)	K10144	EC:2.3.2.27	PREDICTED: E3 ubiquitin-protein ligase MIEL1-like [Pyrus x bretschneideri]	6.12981	76.311	12.4492	3.63798	8.35856e-07	8.68796e-05
MD08G1135400	GO:0005739(mitochondrion);GO:0005773(vacuole);GO:0005886(plasma membrane);GO:0009507(chloroplast);GO:0012505(endomembrane system);GO:0015098(molybdate ion transmembrane transporter activity);GO:0015116(sulfate transmembrane transporter activity);GO:0015689(molybdate ion transport);GO:0016021(integral component of membrane);GO:0031966(mitochondrial membrane)	NA	NA	NA	PREDICTED: molybdate transporter 1 [Malus domestica]	0.678332	2.18345	3.21885	1.68654	0.0204153	0.178114
MD08G1150700	GO:0005545(1-phosphatidylinositol binding);GO:0005634(nucleus);GO:0005794(Golgi apparatus);GO:0005829(cytosol);GO:0005886(plasma membrane);GO:0005905(clathrin-coated pit);GO:0006897(endocytosis);GO:0030136(clathrin-coated vesicle);GO:0030276(clathrin binding);GO:0048268(clathrin coat assembly)	NA	NA	NA	PREDICTED: putative clathrin assembly protein At2g25430 [Pyrus x bretschneideri]	12.0011	39.0827	3.25658	1.70336	0.0154929	0.149435
MD08G1155600	NA	NA	NA	NA	-	5.29021	16.4907	3.11721	1.64026	0.0219227	0.187334
MD08G1156300	GO:0005634(nucleus);GO:0006355(regulation of transcription, DNA-templated);GO:0008270(zinc ion binding);GO:0009639(response to red or far red light)	NA	NA	NA	PREDICTED: protein FAR1-RELATED SEQUENCE 6-like [Malus domestica]	2.29906	6.94085	3.01899	1.59407	0.0250614	0.2045
MD08G1162000	GO:0005515(protein binding);GO:0005737(cytoplasm);GO:0016567(protein ubiquitination);GO:0031463(Cul3-RING ubiquitin ligase complex)	NA	NA	NA	PREDICTED: BTB/POZ domain-containing protein At1g21780 [Malus domestica]	3.97306	16.2221	4.08302	2.02964	0.00419546	0.0596626
MD08G1162600	GO:0009507(chloroplast);GO:0009517(PSII associated light-harvesting complex II);GO:0009523(photosystem II);GO:0009534(chloroplast thylakoid);GO:0009535(chloroplast thylakoid membrane);GO:0009579(thylakoid);GO:0010027(thylakoid membrane organization);GO:0010196(nonphotochemical quenching);GO:0015979(photosynthesis);GO:0016020(membrane);GO:0016021(integral component of membrane);GO:0016168(chloroph…	00195(Photosynthesis)	K03542	NA	PREDICTED: photosystem II 22 kDa protein, chloroplastic [Malus domestica]	3.99156	13.1691	3.29924	1.72213	0.0149411	0.146258
MD08G1162900	GO:0003674(molecular_function);GO:0005622(intracellular);GO:0005623(cell);GO:0005829(cytosol);GO:0005886(plasma membrane);GO:0006970(response to osmotic stress);GO:0009507(chloroplast);GO:0009637(response to blue light);GO:0009738(abscisic acid-activated signaling pathway);GO:0009787(regulation of abscisic acid-activated signaling pathway);GO:0009902(chloroplast relocation);GO:0009903(chloroplast…	NA	NA	NA	PREDICTED: protein PLASTID MOVEMENT IMPAIRED 1 [Malus domestica]	4.46501	15.9913	3.58148	1.84055	0.00903515	0.104117
MD08G1168100	NA	NA	NA	NA	PREDICTED: uncharacterized protein LOC103448108 [Malus domestica]	1.63293	4.41069	2.70109	1.43354	0.0458495	0.291521
MD08G1168600	GO:0045431(flavonol synthase activity)	00941(Flavonoid biosynthesis)	K05278	EC:1.14.11.23	flavonol synthase [Malus domestica]	2.33479	11.9992	5.1393	2.36157	0.000969112	0.0207139
MD08G1170300	GO:0003785(actin monomer binding);GO:0005524(ATP binding);GO:0005634(nucleus);GO:0005886(plasma membrane);GO:0016307(phosphatidylinositol phosphate kinase activity);GO:0016308(1-phosphatidylinositol-4-phosphate 5-kinase activity);GO:0046854(phosphatidylinositol phosphorylation);GO:0051015(actin filament binding)	00562(Inositol phosphate metabolism);04070(Phosphatidylinositol signaling system);04144(Endocytosis)	K00889	EC:2.7.1.68	PREDICTED: phosphatidylinositol 4-phosphate 5-kinase 1-like [Malus domestica]	3.33494	9.20483	2.76012	1.46473	0.038046	0.26244
MD08G1176200	GO:0005737(cytoplasm);GO:0005773(vacuole)	03420(Nucleotide excision repair)	K10841	NA	PREDICTED: early endosome antigen 1 [Pyrus x bretschneideri]	2.17652	9.33928	4.29093	2.10129	0.00292533	0.0464538
MD08G1180900	GO:0003674(molecular_function);GO:0005634(nucleus);GO:0005886(plasma membrane);GO:0008150(biological_process)	NA	NA	NA	PREDICTED: VID27-like protein [Malus domestica]	3.38146	9.02933	2.67024	1.41697	0.0477426	0.297939
MD08G1181100	GO:0003674(molecular_function);GO:0005634(nucleus);GO:0008150(biological_process)	NA	NA	NA	PREDICTED: endochitinase A-like [Malus domestica]	2.26	8.12146	3.59357	1.84542	0.0097353	0.10934
MD08G1186100	GO:0003674(molecular_function);GO:0005576(extracellular region);GO:0005615(extracellular space);GO:0005618(cell wall);GO:0005794(Golgi apparatus);GO:0005829(cytosol);GO:0009505(plant-type cell wall);GO:0009741(response to brassinosteroid);GO:0048046(apoplast)	NA	NA	NA	PREDICTED: protein EXORDIUM-like [Pyrus x bretschneideri]	2.69868	19.2036	7.11592	2.83105	9.4579e-05	0.00358069
MD08G1186500	GO:0004842(ubiquitin-protein transferase activity);GO:0005515(protein binding);GO:0005634(nucleus);GO:0006511(ubiquitin-dependent protein catabolic process);GO:0009737(response to abscisic acid);GO:0010608(posttranscriptional regulation of gene expression);GO:0010629(negative regulation of gene expression);GO:0016567(protein ubiquitination)	NA	NA	NA	PREDICTED: F-box protein FBW2 [Malus domestica]	10.3472	49.8753	4.82019	2.26909	0.00136325	0.0269201
MD08G1186600	NA	NA	NA	NA	PREDICTED: basic leucine zipper 25-like [Malus domestica]	1.6067	5.02225	3.12582	1.64423	0.0244906	0.20164
MD08G1187200	GO:0004674(protein serine/threonine kinase activity);GO:0005634(nucleus);GO:0005737(cytoplasm);GO:0006468(protein phosphorylation);GO:0035556(intracellular signal transduction)	04075(Plant hormone signal transduction)	K14498	EC:2.7.11.1	serine/threonine-protein kinase SAPK2 [Malus domestica]	3.55634	19.9222	5.60188	2.48591	0.000507145	0.0127719
MD08G1196300	GO:0003677(DNA binding);GO:0005634(nucleus);GO:0006351(transcription, DNA-templated);GO:0006355(regulation of transcription, DNA-templated)	NA	NA	NA	PREDICTED: AT-hook motif nuclear-localized protein 28-like [Malus domestica]	6.37754	26.8242	4.20604	2.07246	0.00347516	0.052315
MD08G1196900	GO:0000060(protein import into nucleus, translocation);GO:0003700(transcription factor activity, sequence-specific DNA binding);GO:0005515(protein binding);GO:0005634(nucleus);GO:0005737(cytoplasm);GO:0006351(transcription, DNA-templated);GO:0009739(response to gibberellin);GO:0010076(maintenance of floral meristem identity);GO:0010077(maintenance of inflorescence meristem identity);GO:0010220(po…	03060(Protein export)	K03217	NA	dormancy-associated MADS box 2 protein [Malus domestica]	15.2926	40.8126	2.66879	1.41618	0.0450018	0.288009
MD08G1200700	GO:0009813(flavonoid biosynthetic process);GO:0043231(intracellular membrane-bounded organelle);GO:0052696(flavonoid glucuronidation);GO:0080043(quercetin 3-O-glucosyltransferase activity);GO:0080044(quercetin 7-O-glucosyltransferase activity)	00942(Anthocyanin biosynthesis)	K12937	EC:2.4.1.254	glycosyltransferase, partial [Arabidopsis thaliana]	0.467131	2.61923	5.60705	2.48724	0.000613692	0.0148202
MD08G1205600	GO:0005783(endoplasmic reticulum)	03060(Protein export);04141(Protein processing in endoplasmic reticulum)	K09490	NA	PREDICTED: luminal-binding protein 3-like isoform X1 [Malus domestica]	1.8819	5.48198	2.913	1.5425	0.0303267	0.229477
MD08G1207300	GO:0003700(transcription factor activity, sequence-specific DNA binding);GO:0005634(nucleus);GO:0006351(transcription, DNA-templated);GO:0006355(regulation of transcription, DNA-templated);GO:0009733(response to auxin);GO:0009734(auxin-activated signaling pathway)	04075(Plant hormone signal transduction)	K14484	NA	auxin-responsive protein IAA8-like [Malus domestica]	18.8296	57.0984	3.03237	1.60045	0.0229708	0.193115
MD08G1207700	GO:0003677(DNA binding);GO:0003700(transcription factor activity, sequence-specific DNA binding);GO:0005634(nucleus);GO:0006351(transcription, DNA-templated);GO:0006355(regulation of transcription, DNA-templated);GO:0007275(multicellular organism development);GO:0046983(protein dimerization activity)	00040(Pentose and glucuronate interconversions);00053(Ascorbate and aldarate metabolism);00520(Amino sugar and nucleotide sugar metabolism)	K16190	EC:2.7.1.43	PREDICTED: transcription factor bHLH61-like [Malus domestica]	0.751457	3.03959	4.04492	2.01611	0.00548246	0.073058
MD08G1209900	GO:0005351(sugar:proton symporter activity);GO:0005773(vacuole);GO:0005801(cis-Golgi network);GO:0005886(plasma membrane);GO:0005887(integral component of plasma membrane);GO:0005985(sucrose metabolic process);GO:0008506(sucrose:proton symporter activity);GO:0008515(sucrose transmembrane transporter activity);GO:0015144(carbohydrate transmembrane transporter activity);GO:0015293(symporter activit…	03010(Ribosome)	K02941	NA	PREDICTED: sucrose transport protein SUC4-like [Malus domestica]	1.08596	2.92784	2.69608	1.43086	0.0464359	0.293789
MD08G1211500	GO:0000287(magnesium ion binding);GO:0003824(catalytic activity);GO:0005524(ATP binding);GO:0005622(intracellular);GO:0005634(nucleus);GO:0005737(cytoplasm);GO:0009611(response to wounding);GO:0016310(phosphorylation);GO:0032957(inositol trisphosphate metabolic process);GO:0047325(inositol tetrakisphosphate 1-kinase activity);GO:0052725(inositol-1,3,4-trisphosphate 6-kinase activity);GO:0052726(i…	00562(Inositol phosphate metabolism);04070(Phosphatidylinositol signaling system)	K00913	EC:2.7.1.159;EC:2.7.1.134	PREDICTED: inositol-tetrakisphosphate 1-kinase 3 [Malus domestica]	1.58578	5.84468	3.68568	1.88193	0.00867304	0.101394
MD08G1211700	GO:0003674(molecular_function);GO:0005634(nucleus);GO:0008150(biological_process)	03040(Spliceosome)	K12662	NA	PREDICTED: uncharacterized protein LOC103928190 [Pyrus x bretschneideri]	5.38402	15.1786	2.81918	1.49528	0.0344566	0.248477
MD08G1217600	GO:0004672(protein kinase activity);GO:0004674(protein serine/threonine kinase activity);GO:0005515(protein binding);GO:0005524(ATP binding);GO:0005886(plasma membrane);GO:0006468(protein phosphorylation);GO:0007169(transmembrane receptor protein tyrosine kinase signaling pathway);GO:0016021(integral component of membrane);GO:0016301(kinase activity);GO:0042277(peptide binding);GO:0090548(respons…	04075(Plant hormone signal transduction)	K13415	EC:2.7.10.1;EC:2.7.11.1	PREDICTED: receptor-like protein kinase HAIKU2 [Malus domestica]	0.481547	2.30772	4.79231	2.26072	0.00172872	0.031574
MD08G1217800	GO:0016787(hydrolase activity);GO:0070062(extracellular exosome)	NA	NA	NA	PREDICTED: carboxymethylenebutenolidase homolog [Malus domestica]	1.69878	28.1535	16.5727	4.05074	8.84351e-08	1.33042e-05
MD08G1218000	GO:0005215(transporter activity);GO:0005634(nucleus);GO:0005829(cytosol);GO:0005886(plasma membrane);GO:0006810(transport);GO:0007049(cell cycle);GO:0008289(lipid binding);GO:0016021(integral component of membrane);GO:0051301(cell division)	NA	NA	NA	PREDICTED: patellin-3-like [Malus domestica]	14.8668	42.3825	2.85081	1.51137	0.0319135	0.236394
MD08G1218200	GO:0005215(transporter activity);GO:0005634(nucleus);GO:0005829(cytosol);GO:0005886(plasma membrane);GO:0006810(transport);GO:0007049(cell cycle);GO:0008289(lipid binding);GO:0016021(integral component of membrane);GO:0051301(cell division)	NA	NA	NA	PREDICTED: patellin-3-like [Malus domestica]	13.1194	517.708	39.4612	5.30236	2.19295e-11	1.08279e-08
MD08G1220900	GO:0009416(response to light stimulus);GO:0009535(chloroplast thylakoid membrane);GO:0009768(photosynthesis, light harvesting in photosystem I);GO:0009941(chloroplast envelope);GO:0010287(plastoglobule);GO:0016168(chlorophyll binding);GO:0031409(pigment binding)	00196(Photosynthesis - antenna proteins)	K08917	NA	PREDICTED: chlorophyll a-b binding protein CP24 10A, chloroplastic [Malus domestica]	2.75278	22.8233	8.29101	3.05155	2.78949e-05	0.00141435
MD08G1222200	GO:0003924(GTPase activity);GO:0005515(protein binding);GO:0005525(GTP binding);GO:0005737(cytoplasm);GO:0005739(mitochondrion);GO:0005777(peroxisome);GO:0007623(circadian rhythm);GO:0009507(chloroplast);GO:0009707(chloroplast outer membrane);GO:0010020(chloroplast fission);GO:0016559(peroxisome fission);GO:0042802(identical protein binding)	NA	NA	NA	PREDICTED: dynamin-like protein ARC5 [Malus domestica]	1.46184	4.25212	2.90875	1.5404	0.0306208	0.231201
MD08G1231400	GO:0005634(nucleus);GO:0005737(cytoplasm);GO:0007275(multicellular organism development);GO:0009646(response to absence of light);GO:0009813(flavonoid biosynthetic process);GO:0010422(regulation of brassinosteroid biosynthetic process);GO:0016131(brassinosteroid metabolic process);GO:0016132(brassinosteroid biosynthetic process);GO:0016491(oxidoreductase activity);GO:0016614(oxidoreductase activi…	00943(Isoflavonoid biosynthesis)	K13265	EC:1.1.1.348	PREDICTED: vestitone reductase-like isoform X1 [Pyrus x bretschneideri]	26.4419	85.171	3.22106	1.68754	0.01644	0.153915
MD08G1234400	GO:0005737(cytoplasm);GO:0030001(metal ion transport);GO:0046914(transition metal ion binding);GO:0046916(cellular transition metal ion homeostasis)	NA	NA	NA	PREDICTED: collagen alpha-1(XVIII) chain-like [Malus domestica]	0.869456	12.7158	14.625	3.87036	3.3424e-07	3.96014e-05
MD08G1236800	GO:0009055(electron carrier activity);GO:0009416(response to light stimulus);GO:0009507(chloroplast);GO:0009570(chloroplast stroma);GO:0009643(photosynthetic acclimation);GO:0009767(photosynthetic electron transport chain);GO:0046872(metal ion binding);GO:0051537(2 iron, 2 sulfur cluster binding)	00195(Photosynthesis)	K02639	NA	PREDICTED: ferredoxin, leaf L-A-like [Pyrus x bretschneideri]	21.5851	137.014	6.3476	2.66621	0.000191857	0.00616677
MD08G1240000	GO:0001047(core promoter binding);GO:0003700(transcription factor activity, sequence-specific DNA binding);GO:0005515(protein binding);GO:0005634(nucleus);GO:0006351(transcription, DNA-templated);GO:0006355(regulation of transcription, DNA-templated);GO:0044212(transcription regulatory region DNA binding)	04712(Circadian rhythm - plant)	K16221	NA	PREDICTED: transcription factor TCP8-like [Malus domestica]	1.15141	3.19934	2.77863	1.47437	0.0397245	0.268484
MD08G1243000	GO:0009809(lignin biosynthetic process);GO:0016020(membrane);GO:0016709(oxidoreductase activity, acting on paired donors, with incorporation or reduction of molecular oxygen, NAD(P)H as one donor, and incorporation of one atom of oxygen)	00940(Phenylpropanoid biosynthesis);00945(Stilbenoid, diarylheptanoid and gingerol biosynthesis);00941(Flavonoid biosynthesis)	K09754	EC:1.14.13.36	PREDICTED: cytochrome P450 98A2-like [Malus domestica]	0.589221	15.0078	25.4707	4.67076	2.53038e-09	6.96332e-07
MD08G1246800	GO:0005739(mitochondrion);GO:0008375(acetylglucosaminyltransferase activity);GO:0016021(integral component of membrane);GO:0016757(transferase activity, transferring glycosyl groups)	04144(Endocytosis)	K12471	NA	PREDICTED: uncharacterized protein LOC103421405 [Malus domestica]	1.07471	2.9596	2.75386	1.46146	0.0450488	0.288229
MD08G1247700	GO:0003677(DNA binding);GO:0003700(transcription factor activity, sequence-specific DNA binding);GO:0005515(protein binding);GO:0005634(nucleus);GO:0006351(transcription, DNA-templated);GO:0006355(regulation of transcription, DNA-templated);GO:0009733(response to auxin);GO:0009734(auxin-activated signaling pathway);GO:0010150(leaf senescence);GO:0042802(identical protein binding);GO:0045892(negat…	04075(Plant hormone signal transduction)	K14486	NA	PREDICTED: auxin response factor 1 [Malus domestica]	12.9308	34.4009	2.66039	1.41164	0.045319	0.289311
MD08G1249500	GO:0003689(DNA clamp loader activity);GO:0005663(DNA replication factor C complex);GO:0006261(DNA-dependent DNA replication)	NA	NA	NA	PREDICTED: protein STICHEL [Malus domestica]	2.40665	8.70811	3.61835	1.85533	0.00849528	0.100135
MD08G1250800	GO:0000293(ferric-chelate reductase activity);GO:0006811(ion transport);GO:0009507(chloroplast);GO:0009767(photosynthetic electron transport chain);GO:0016020(membrane);GO:0016021(integral component of membrane);GO:0016491(oxidoreductase activity);GO:0031969(chloroplast membrane);GO:0046872(metal ion binding)	04626(Plant-pathogen interaction)	K13447	EC:1.6.3.-;EC:1.11.1.-	PREDICTED: ferric reduction oxidase 6-like [Malus domestica]	5.21361	16.997	3.26013	1.70493	0.01555	0.149709
MD09G1000800	GO:0005737(cytoplasm);GO:0005829(cytosol);GO:0006006(glucose metabolic process);GO:0006096(glycolytic process);GO:0009507(chloroplast);GO:0009570(chloroplast stroma);GO:0009941(chloroplast envelope);GO:0016020(membrane);GO:0016620(oxidoreductase activity, acting on the aldehyde or oxo group of donors, NAD or NADP as acceptor);GO:0019253(reductive pentose-phosphate cycle);GO:0047100(glyceraldehyde…	01200(Carbon metabolism);00710(Carbon fixation in photosynthetic organisms)	K05298	EC:1.2.1.13	PREDICTED: glyceraldehyde-3-phosphate dehydrogenase A, chloroplastic [Malus domestica]	46.5966	125.576	2.69497	1.43027	0.0423428	0.277516
MD09G1006400	GO:0003677(DNA binding);GO:0003700(transcription factor activity, sequence-specific DNA binding);GO:0005515(protein binding);GO:0005634(nucleus);GO:0006351(transcription, DNA-templated);GO:0007275(multicellular organism development);GO:0009651(response to salt stress);GO:0009737(response to abscisic acid);GO:0010089(xylem development);GO:0010150(leaf senescence);GO:0016032(viral process);GO:00458…	00561(Glycerolipid metabolism)	K01054	EC:3.1.1.23	NAC domain-containing protein 83 [Malus domestica]	5.47525	26.9263	4.91782	2.29802	0.00120847	0.0245637
MD09G1014300	GO:0004017(adenylate kinase activity);GO:0005524(ATP binding);GO:0005739(mitochondrion);GO:0019201(nucleotide kinase activity);GO:0046939(nucleotide phosphorylation)	00230(Purine metabolism)	K00939	EC:2.7.4.3	PREDICTED: probable adenylate kinase 7, mitochondrial [Malus domestica]	5.1992	17.3619	3.33935	1.73957	0.0141633	0.141427
MD09G1014400	GO:0000059(protein import into nucleus, docking);GO:0006999(nuclear pore organization);GO:0017056(structural constituent of nuclear pore);GO:0044611(nuclear pore inner ring)	NA	NA	NA	PREDICTED: uncharacterized protein LOC103442151 isoform X1 [Malus domestica]	0.950985	3.63841	3.82594	1.93581	0.00667796	0.0845542
MD09G1016600	GO:0003333(amino acid transmembrane transport);GO:0005886(plasma membrane);GO:0015171(amino acid transmembrane transporter activity)	NA	NA	NA	PREDICTED: lysine histidine transporter 1-like [Malus domestica]	15.2164	144.33	9.4852	3.24568	8.14037e-06	0.000522882
MD09G1021000	GO:0000447(endonucleolytic cleavage in ITS1 to separate SSU-rRNA from 5.8S rRNA and LSU-rRNA from tricistronic rRNA transcript (SSU-rRNA, 5.8S rRNA, LSU-rRNA));GO:0000472(endonucleolytic cleavage to generate mature 5'-end of SSU-rRNA from (SSU-rRNA, 5.8S rRNA, LSU-rRNA));GO:0000480(endonucleolytic cleavage in 5'-ETS of tricistronic rRNA transcript (SSU-rRNA, 5.8S rRNA, LSU-rRNA));GO:0003723(RNA b…	NA	NA	NA	PREDICTED: pre-rRNA-processing protein esf2 [Malus domestica]	3.91779	15.4674	3.94799	1.98112	0.00536704	0.0718128
MD09G1024200	GO:0005737(cytoplasm);GO:0006952(defense response);GO:0007165(signal transduction);GO:0016021(integral component of membrane);GO:0043531(ADP binding)	03040(Spliceosome);04141(Protein processing in endoplasmic reticulum);04144(Endocytosis)	K03283	NA	PREDICTED: TMV resistance protein N-like [Pyrus x bretschneideri]	1.56037	7.99949	5.12666	2.35802	0.000923922	0.0200456
MD09G1027400	NA	NA	NA	NA	PREDICTED: titin homolog isoform X2 [Pyrus x bretschneideri]	52.7755	153.672	2.91181	1.54192	0.0283179	0.220403
MD09G1030800	GO:0005737(cytoplasm);GO:0005778(peroxisomal membrane);GO:0009941(chloroplast envelope);GO:0016021(integral component of membrane);GO:0016656(monodehydroascorbate reductase (NADH) activity);GO:0042744(hydrogen peroxide catabolic process);GO:0050660(flavin adenine dinucleotide binding);GO:0055114(oxidation-reduction process)	00053(Ascorbate and aldarate metabolism)	K08232	EC:1.6.5.4	PREDICTED: monodehydroascorbate reductase 4, peroxisomal-like isoform X1 [Malus domestica]	11.2011	37.7737	3.37233	1.75374	0.0127384	0.131626
MD09G1031100	GO:0003674(molecular_function);GO:0005634(nucleus);GO:0005730(nucleolus);GO:0009506(plasmodesma)	00270(Cysteine and methionine metabolism)	K17398	EC:2.1.1.37	PREDICTED: uncharacterized protein LOC103442246 [Malus domestica]	0.708051	1.93653	2.73501	1.45155	0.0434094	0.281441
MD09G1039300	GO:0005634(nucleus);GO:0008270(zinc ion binding);GO:0009737(response to abscisic acid);GO:0010200(response to chitin)	NA	NA	NA	PREDICTED: zinc finger AN1 domain-containing stress-associated protein 12-like [Malus domestica]	2.5905	9.4606	3.65204	1.8687	0.00955172	0.108145
MD09G1044800	GO:0005737(cytoplasm);GO:0006952(defense response);GO:0007165(signal transduction);GO:0016021(integral component of membrane);GO:0043531(ADP binding)	03040(Spliceosome);04141(Protein processing in endoplasmic reticulum);04144(Endocytosis)	K03283	NA	PREDICTED: TMV resistance protein N-like [Pyrus x bretschneideri]	0.28263	1.44127	5.09949	2.35035	0.0013268	0.0264285
MD09G1045800	GO:0000103(sulfate assimilation);GO:0005829(cytosol);GO:0005886(plasma membrane);GO:0006457(protein folding);GO:0015035(protein disulfide oxidoreductase activity);GO:0016671(oxidoreductase activity, acting on a sulfur group of donors, disulfide as acceptor);GO:0034599(cellular response to oxidative stress);GO:0045454(cell redox homeostasis);GO:0055114(oxidation-reduction process)	NA	NA	NA	PREDICTED: thioredoxin H2-like [Pyrus x bretschneideri]	14.745	106.452	7.21955	2.85191	7.24195e-05	0.00292582
MD09G1059100	NA	NA	NA	NA	PREDICTED: uncharacterized protein LOC103442825 [Malus domestica]	1.2896	5.26792	4.08491	2.0303	0.00512923	0.0694025
MD09G1072800	GO:0003674(molecular_function);GO:0005886(plasma membrane);GO:0009505(plant-type cell wall);GO:0009651(response to salt stress);GO:0009825(multidimensional cell growth);GO:0009897(external side of plasma membrane);GO:0009930(longitudinal side of cell surface);GO:0010215(cellulose microfibril organization);GO:0016328(lateral plasma membrane);GO:0031225(anchored component of membrane);GO:0046658(an…	NA	NA	NA	PREDICTED: LOW QUALITY PROTEIN: COBRA-like protein 1 [Malus domestica]	0.921476	5.73233	6.22082	2.6371	0.000287381	0.00839276
MD09G1073900	GO:0003677(DNA binding);GO:0003700(transcription factor activity, sequence-specific DNA binding);GO:0005515(protein binding);GO:0005634(nucleus);GO:0006351(transcription, DNA-templated);GO:0006355(regulation of transcription, DNA-templated);GO:0009908(flower development);GO:0030154(cell differentiation);GO:0046983(protein dimerization activity);GO:0048481(plant ovule development)	03060(Protein export)	K03217	NA	MADS domain class transcription factor [Malus domestica]	4.06476	13.441	3.3067	1.72539	0.0151231	0.147597
MD09G1074100	GO:0005515(protein binding)	NA	NA	NA	truncated transcription factor CAULIFLOWER A [Malus domestica]	1.45529	4.45658	3.06234	1.61463	0.026335	0.209973
MD09G1079200	GO:0005634(nucleus);GO:0009416(response to light stimulus);GO:0009909(regulation of flower development)	04712(Circadian rhythm - plant)	K12135	NA	PREDICTED: zinc finger protein CONSTANS-LIKE 2 [Malus domestica]	4.23543	25.5209	6.02557	2.5911	0.000295009	0.00860456
MD09G1080400	GO:0016420(malonyltransferase activity)	00944(Flavone and flavonol biosynthesis);00943(Isoflavonoid biosynthesis)	K13264	EC:2.3.1.115	PREDICTED: phenolic glucoside malonyltransferase 2-like [Malus domestica]	2.71666	9.16438	3.3734	1.7542	0.0137633	0.138768
MD09G1085900	GO:0003682(chromatin binding);GO:0005737(cytoplasm);GO:0008150(biological_process);GO:0008536(Ran GTPase binding)	04120(Ubiquitin mediated proteolysis)	K10615	EC:2.3.2.26	PREDICTED: ultraviolet-B receptor UVR8 isoform X1 [Malus domestica]	2.0525	9.02354	4.39636	2.13631	0.00279528	0.0448757
MD09G1090400	GO:0003674(molecular_function);GO:0005634(nucleus);GO:0008150(biological_process)	NA	NA	NA	PREDICTED: uncharacterized protein LOC103411248 [Malus domestica]	8.93834	21.1221	2.36309	1.24067	0.0473961	0.29679
MD09G1092000	GO:0001522(pseudouridine synthesis);GO:0005634(nucleus);GO:0009506(plasmodesma);GO:0042254(ribosome biogenesis)	NA	NA	NA	PREDICTED: uncharacterized protein LOC103435460 [Malus domestica]	3.72072	10.1422	2.72588	1.44672	0.0409209	0.272651
MD09G1093100	GO:0000139(Golgi membrane);GO:0005768(endosome);GO:0005794(Golgi apparatus);GO:0005802(trans-Golgi network);GO:0016021(integral component of membrane);GO:0016051(carbohydrate biosynthetic process);GO:0016757(transferase activity, transferring glycosyl groups);GO:0016758(transferase activity, transferring hexosyl groups);GO:0045489(pectin biosynthetic process);GO:0047262(polygalacturonate 4-alpha-…	00500(Starch and sucrose metabolism);00520(Amino sugar and nucleotide sugar metabolism)	K13648	EC:2.4.1.43	PREDICTED: probable galacturonosyltransferase 10 [Malus domestica]	1.67616	6.64322	3.96335	1.98672	0.00530822	0.0711924
MD09G1096400	GO:0003674(molecular_function);GO:0005634(nucleus);GO:0008150(biological_process)	NA	NA	NA	PREDICTED: uncharacterized protein LOC103421553 [Malus domestica]	4.62248	12.5451	2.71392	1.44038	0.0422129	0.276976
MD09G1096900	GO:0003674(molecular_function);GO:0005634(nucleus);GO:0009611(response to wounding)	NA	NA	NA	PREDICTED: uncharacterized protein LOC103442553 [Malus domestica]	3.60077	10.693	2.96965	1.57029	0.0312208	0.233615
MD09G1098300	GO:0005515(protein binding);GO:0005886(plasma membrane);GO:0009496(plastoquinol--plastocyanin reductase activity);GO:0009507(chloroplast);GO:0009512(cytochrome b6f complex);GO:0009534(chloroplast thylakoid);GO:0009535(chloroplast thylakoid membrane);GO:0009579(thylakoid);GO:0009767(photosynthetic electron transport chain);GO:0009941(chloroplast envelope);GO:0010196(nonphotochemical quenching);GO:…	00195(Photosynthesis)	K02636	EC:1.10.9.1	PREDICTED: cytochrome b6-f complex iron-sulfur subunit, chloroplastic-like [Malus domestica]	21.4349	118.812	5.54293	2.47065	0.000510272	0.0128083
MD09G1099000	GO:0005634(nucleus);GO:0005829(cytosol);GO:0005886(plasma membrane);GO:0006950(response to stress);GO:0016787(hydrolase activity)	NA	NA	NA	PREDICTED: universal stress protein PHOS32-like [Malus domestica]	3.08161	11.4889	3.72821	1.89849	0.0078096	0.094588
MD09G1102000	GO:0016021(integral component of membrane)	00920(Sulfur metabolism);00230(Purine metabolism)	K00860	EC:2.7.1.25	PREDICTED: uncharacterized protein LOC103442567 isoform X2 [Malus domestica]	1.2668	4.84839	3.82726	1.93631	0.00847505	0.100053
MD09G1103400	GO:0005634(nucleus);GO:0005730(nucleolus);GO:0005829(cytosol);GO:0006355(regulation of transcription, DNA-templated);GO:0008150(biological_process);GO:0009507(chloroplast);GO:0044212(transcription regulatory region DNA binding)	NA	NA	NA	PREDICTED: mediator-associated protein 1-like [Malus domestica]	38.6017	110.434	2.86086	1.51645	0.0312631	0.233778
MD09G1103800	GO:0000272(polysaccharide catabolic process);GO:0005576(extracellular region);GO:0009507(chloroplast);GO:0016161(beta-amylase activity)	00500(Starch and sucrose metabolism)	K01177	EC:3.2.1.2	PREDICTED: LOW QUALITY PROTEIN: beta-amylase-like [Malus domestica]	2.73508	20.9688	7.66664	2.93859	4.81123e-05	0.00218725
MD09G1119100	GO:0005886(plasma membrane);GO:0016020(membrane);GO:0031225(anchored component of membrane);GO:0046658(anchored component of plasma membrane)	NA	NA	NA	PREDICTED: fasciclin-like arabinogalactan protein 7 [Malus domestica]	0.97025	44.5934	45.9607	5.52233	8.42732e-12	4.81769e-09
MD09G1121900	GO:0000155(phosphorelay sensor kinase activity);GO:0000160(phosphorelay signal transduction system);GO:0004673(protein histidine kinase activity);GO:0004721(phosphoprotein phosphatase activity);GO:0005034(osmosensor activity);GO:0005515(protein binding);GO:0005789(endoplasmic reticulum membrane);GO:0005886(plasma membrane);GO:0006970(response to osmotic stress);GO:0009414(response to water depriv…	04075(Plant hormone signal transduction)	K14489	EC:2.7.13.3	CHASE histidine kinase 2 [Malus domestica]	0.349545	0.995429	2.84778	1.50984	0.03715	0.258775
MD09G1122100	GO:0005515(protein binding);GO:0005634(nucleus);GO:0008270(zinc ion binding);GO:0009536(plastid);GO:0009793(embryo development ending in seed dormancy);GO:0010071(root meristem specification);GO:0010078(maintenance of root meristem identity);GO:0010468(regulation of gene expression);GO:0010492(maintenance of shoot apical meristem identity);GO:0031347(regulation of defense response);GO:0042803(pro…	NA	NA	NA	PREDICTED: OBERON-like protein [Malus domestica]	24.5943	64.8833	2.63815	1.39952	0.0471915	0.296383
MD09G1122500	GO:0009416(response to light stimulus);GO:0009535(chloroplast thylakoid membrane);GO:0009768(photosynthesis, light harvesting in photosystem I);GO:0009941(chloroplast envelope);GO:0010287(plastoglobule);GO:0016168(chlorophyll binding);GO:0031409(pigment binding)	00196(Photosynthesis - antenna proteins)	K08913	NA	PREDICTED: chlorophyll a-b binding protein 151, chloroplastic-like [Pyrus x bretschneideri]	8.61643	85.7153	9.9479	3.31439	5.75842e-06	0.000389579
MD09G1124200	GO:0002181(cytoplasmic translation);GO:0003735(structural constituent of ribosome);GO:0022625(cytosolic large ribosomal subunit);GO:0030687(preribosome, large subunit precursor);GO:0070180(large ribosomal subunit rRNA binding)	03010(Ribosome)	K02943	NA	PREDICTED: LOW QUALITY PROTEIN: 60S acidic ribosomal protein P2B-like [Malus domestica]	4.92081	14.2471	2.89528	1.5337	0.0313842	0.23427
MD09G1127000	GO:0005774(vacuolar membrane);GO:0005886(plasma membrane);GO:0016020(membrane);GO:0031225(anchored component of membrane);GO:0046658(anchored component of plasma membrane)	03015(mRNA surveillance pathway)	K03456	NA	PREDICTED: fasciclin-like arabinogalactan protein 2 [Malus domestica]	9.46057	40.8881	4.32195	2.11168	0.00279652	0.0448757
MD09G1130400	GO:0004842(ubiquitin-protein transferase activity);GO:0019005(SCF ubiquitin ligase complex);GO:0031146(SCF-dependent proteasomal ubiquitin-dependent protein catabolic process)	00970(Aminoacyl-tRNA biosynthesis)	K01889	EC:6.1.1.20	PREDICTED: F-box/kelch-repeat protein At3g06240-like [Malus domestica]	0.824219	2.60748	3.16357	1.66156	0.0221221	0.188373
MD09G1134000	GO:0000783(nuclear telomere cap complex);GO:0003691(double-stranded telomeric DNA binding);GO:0031627(telomeric loop formation)	NA	NA	NA	PREDICTED: DNA ligase 1-like [Malus domestica]	2.59319	11.5364	4.44872	2.15339	0.0024185	0.0403383
MD09G1134800	GO:0009416(response to light stimulus);GO:0009535(chloroplast thylakoid membrane);GO:0009768(photosynthesis, light harvesting in photosystem I);GO:0009941(chloroplast envelope);GO:0010287(plastoglobule);GO:0016168(chlorophyll binding);GO:0031409(pigment binding)	00196(Photosynthesis - antenna proteins)	K08909	NA	PREDICTED: photosystem I chlorophyll a/b-binding protein 3-1, chloroplastic-like [Malus domestica]	3.81045	13.6502	3.58232	1.84089	0.00951246	0.107893
MD09G1140300	GO:0005385(zinc ion transmembrane transporter activity);GO:0005886(plasma membrane);GO:0071577(zinc II ion transmembrane transport)	NA	NA	NA	PREDICTED: LOW QUALITY PROTEIN: zinc transporter 8-like [Malus domestica]	10.2623	59.1895	5.76769	2.52799	0.000387231	0.0104667
MD09G1140700	GO:0009813(flavonoid biosynthetic process);GO:0043231(intracellular membrane-bounded organelle);GO:0052696(flavonoid glucuronidation);GO:0080043(quercetin 3-O-glucosyltransferase activity);GO:0080044(quercetin 7-O-glucosyltransferase activity)	00942(Anthocyanin biosynthesis)	K12938	EC:2.4.1.-	uDP-glycosyltransferase 71A15 [Malus domestica]	4.9697	16.0327	3.2261	1.68979	0.0168401	0.156347
MD09G1141100	GO:0009813(flavonoid biosynthetic process);GO:0043231(intracellular membrane-bounded organelle);GO:0052696(flavonoid glucuronidation);GO:0080043(quercetin 3-O-glucosyltransferase activity);GO:0080044(quercetin 7-O-glucosyltransferase activity)	00942(Anthocyanin biosynthesis)	K12938	EC:2.4.1.-	uDP-glycosyltransferase 71A15 [Malus domestica]	25.3712	75.9982	2.99545	1.58277	0.0244885	0.20164
MD09G1141500	GO:0009813(flavonoid biosynthetic process);GO:0043231(intracellular membrane-bounded organelle);GO:0052696(flavonoid glucuronidation);GO:0080043(quercetin 3-O-glucosyltransferase activity);GO:0080044(quercetin 7-O-glucosyltransferase activity)	00942(Anthocyanin biosynthesis)	K12938	EC:2.4.1.-	PREDICTED: UDP-glycosyltransferase 71A15-like [Malus domestica]	5.50479	19.8828	3.61191	1.85276	0.00877132	0.102177
MD09G1144200	GO:0005737(cytoplasm);GO:0005739(mitochondrion);GO:0008380(RNA splicing);GO:0008536(Ran GTPase binding);GO:0032981(mitochondrial respiratory chain complex I assembly)	04120(Ubiquitin mediated proteolysis)	K10615	EC:2.3.2.26	PREDICTED: ultraviolet-B receptor UVR8-like [Malus domestica]	1.88008	5.66295	3.01208	1.59076	0.0253805	0.205768
MD09G1150200	GO:0000148(1,3-beta-D-glucan synthase complex);GO:0003843(1,3-beta-D-glucan synthase activity);GO:0005886(plasma membrane)	00500(Starch and sucrose metabolism)	K00706	EC:2.4.1.34	PREDICTED: callose synthase 7-like [Malus domestica]	0.74896	4.32627	5.77636	2.53016	0.000488066	0.0123595
MD09G1152600	GO:0004553(hydrolase activity, hydrolyzing O-glycosyl compounds);GO:0005576(extracellular region);GO:0005618(cell wall);GO:0010411(xyloglucan metabolic process);GO:0016762(xyloglucan:xyloglucosyl transferase activity);GO:0016798(hydrolase activity, acting on glycosyl bonds);GO:0042546(cell wall biogenesis);GO:0048046(apoplast);GO:0071555(cell wall organization)	04075(Plant hormone signal transduction)	K14504	EC:2.4.1.207	brassinosteroid-regulated protein BRU1-like precursor [Malus domestica]	2.10789	38.68	18.3501	4.19772	3.33052e-08	6.04436e-06
MD09G1156900	GO:0004674(protein serine/threonine kinase activity);GO:0005886(plasma membrane)	00520(Amino sugar and nucleotide sugar metabolism)	K01183	EC:3.2.1.14	PREDICTED: probable LRR receptor-like serine/threonine-protein kinase At1g07650 [Malus domestica]	1.21725	13.9097	11.4271	3.51439	1.96631e-06	0.000162912
MD09G1159500	GO:0005768(endosome);GO:0005794(Golgi apparatus);GO:0005802(trans-Golgi network);GO:0016021(integral component of membrane);GO:0016757(transferase activity, transferring glycosyl groups)	NA	NA	NA	PREDICTED: uncharacterized protein At1g04910-like [Malus domestica]	3.69487	10.1751	2.75385	1.46145	0.0396244	0.268256
MD09G1163400	GO:0005886(plasma membrane);GO:0006508(proteolysis);GO:0008233(peptidase activity);GO:0016021(integral component of membrane)	NA	NA	NA	PREDICTED: uncharacterized membrane protein At1g16860-like [Malus domestica]	2.90838	12.2484	4.21143	2.07431	0.00345956	0.0521833
MD09G1168600	GO:0005739(mitochondrion);GO:0008150(biological_process);GO:0008289(lipid binding);GO:0016021(integral component of membrane)	NA	NA	NA	PREDICTED: uncharacterized protein LOC103443388 [Malus domestica]	34.1157	116.408	3.41215	1.77068	0.0117869	0.12515
MD09G1172000	GO:0003677(DNA binding);GO:0005886(plasma membrane);GO:0008150(biological_process)	NA	NA	NA	PREDICTED: uncharacterized protein LOC103425518 isoform X1 [Malus domestica]	1.91366	6.30248	3.29342	1.71959	0.0153179	0.14861
MD09G1173000	GO:0001666(response to hypoxia);GO:0004021(L-alanine:2-oxoglutarate aminotransferase activity);GO:0005524(ATP binding);GO:0005739(mitochondrion);GO:0005829(cytosol);GO:0009058(biosynthetic process);GO:0009507(chloroplast);GO:0019481(L-alanine catabolic process, by transamination);GO:0030170(pyridoxal phosphate binding);GO:0046686(response to cadmium ion)	01200(Carbon metabolism);01210(2-Oxocarboxylic acid metabolism);01230(Biosynthesis of amino acids);00710(Carbon fixation in photosynthetic organisms);00250(Alanine, aspartate and glutamate metabolism);00220(Arginine biosynthesis)	K00814	EC:2.6.1.2	PREDICTED: alanine aminotransferase 2 [Malus domestica]	27.0922	120.868	4.46136	2.15748	0.00223836	0.0382259
MD09G1187300	GO:0003674(molecular_function);GO:0005634(nucleus);GO:0005829(cytosol);GO:0005886(plasma membrane);GO:0008150(biological_process);GO:0016021(integral component of membrane)	04144(Endocytosis)	K05747	NA	PREDICTED: pollen-specific leucine-rich repeat extensin-like protein 1 [Malus domestica]	0.598896	2.3627	3.9451	1.98006	0.00694141	0.0867663
MD09G1189600	GO:0003674(molecular_function);GO:0005886(plasma membrane);GO:0008150(biological_process)	NA	NA	NA	PREDICTED: uncharacterized protein LOC103453586 [Malus domestica]	97.3653	623.565	6.40439	2.67906	0.000176679	0.00578813
MD09G1192300	GO:0003676(nucleic acid binding);GO:0003677(DNA binding);GO:0003700(transcription factor activity, sequence-specific DNA binding);GO:0005634(nucleus);GO:0006351(transcription, DNA-templated);GO:0006355(regulation of transcription, DNA-templated);GO:0008270(zinc ion binding);GO:0046872(metal ion binding)	00052(Galactose metabolism);00600(Sphingolipid metabolism);00531(Glycosaminoglycan degradation);00604(Glycosphingolipid biosynthesis - ganglio series);00511(Other glycan degradation)	K12309	EC:3.2.1.23	PREDICTED: protein indeterminate-domain 7-like isoform X1 [Malus domestica]	2.05662	8.33898	4.0547	2.01959	0.0043908	0.0616735
MD09G1193000	GO:0003674(molecular_function);GO:0005886(plasma membrane);GO:0008150(biological_process);GO:0009506(plasmodesma);GO:0016021(integral component of membrane)	00970(Aminoacyl-tRNA biosynthesis)	K01868	EC:6.1.1.3	PREDICTED: protein YLS9 [Malus domestica]	3.42395	15.9811	4.66744	2.22263	0.00178659	0.0322732
MD09G1195100	GO:0005524(ATP binding);GO:0005774(vacuolar membrane);GO:0005886(plasma membrane);GO:0008559(xenobiotic-transporting ATPase activity);GO:0016021(integral component of membrane);GO:0042626(ATPase activity, coupled to transmembrane movement of substances)	02010(ABC transporters)	K05665	NA	PREDICTED: ABC transporter C family member 8 [Malus domestica]	29.1983	136.555	4.67682	2.22553	0.00163185	0.0303626
MD09G1202300	GO:0003700(transcription factor activity, sequence-specific DNA binding);GO:0005634(nucleus);GO:0006351(transcription, DNA-templated);GO:0006355(regulation of transcription, DNA-templated);GO:0009733(response to auxin);GO:0009734(auxin-activated signaling pathway)	04075(Plant hormone signal transduction)	K14484	NA	auxin-responsive protein IAA26-like [Malus domestica]	0.64264	5.41872	8.43197	3.07587	3.23324e-05	0.00160379
MD09G1207300	GO:0006810(transport);GO:0009055(electron carrier activity);GO:0009507(chloroplast);GO:0009535(chloroplast thylakoid membrane);GO:0009773(photosynthetic electron transport in photosystem I);GO:0010598(NAD(P)H dehydrogenase complex (plastoquinone));GO:0046872(metal ion binding);GO:0051537(2 iron, 2 sulfur cluster binding)	NA	NA	NA	PREDICTED: photosynthetic NDH subunit of subcomplex B 3, chloroplastic-like [Malus domestica]	1.41963	6.93621	4.88593	2.28863	0.00164213	0.0305042
MD09G1232300	GO:0005576(extracellular region);GO:0005618(cell wall);GO:0016787(hydrolase activity);GO:0052689(carboxylic ester hydrolase activity);GO:0071555(cell wall organization)	NA	NA	NA	PREDICTED: pectin acetylesterase 8-like isoform X1 [Malus domestica]	1.42684	5.55	3.88973	1.95967	0.00646671	0.0825651
MD09G1232400	GO:0005576(extracellular region);GO:0005618(cell wall);GO:0016787(hydrolase activity);GO:0052689(carboxylic ester hydrolase activity);GO:0071555(cell wall organization)	00600(Sphingolipid metabolism)	K00654	EC:2.3.1.50	PREDICTED: pectin acetylesterase 8-like isoform X1 [Malus domestica]	2.51757	9.72744	3.86382	1.95003	0.00671905	0.0846993
MD09G1236300	GO:0004674(protein serine/threonine kinase activity);GO:0005524(ATP binding);GO:0006468(protein phosphorylation);GO:0009507(chloroplast);GO:0009742(brassinosteroid mediated signaling pathway);GO:0016301(kinase activity);GO:0032880(regulation of protein localization)	04075(Plant hormone signal transduction)	K14502	EC:2.7.11.1	PREDICTED: shaggy-related protein kinase eta isoform X3 [Malus domestica]	65.7241	177.006	2.69317	1.4293	0.0424393	0.277863
MD09G1236800	GO:0000151(ubiquitin ligase complex);GO:0004842(ubiquitin-protein transferase activity);GO:0005634(nucleus);GO:0006511(ubiquitin-dependent protein catabolic process);GO:0007568(aging);GO:0009414(response to water deprivation);GO:0009416(response to light stimulus);GO:0009734(auxin-activated signaling pathway);GO:0009926(auxin polar transport);GO:0009934(regulation of meristem structural organizat…	04145(Phagosome)	K07374	NA	PREDICTED: F-box/LRR-repeat MAX2 homolog A [Malus domestica]	6.8646	28.7841	4.19312	2.06802	0.00340133	0.0515088
MD09G1246400	GO:0004674(protein serine/threonine kinase activity);GO:0005524(ATP binding);GO:0005886(plasma membrane);GO:0006468(protein phosphorylation);GO:0016021(integral component of membrane);GO:0016301(kinase activity);GO:0030246(carbohydrate binding)	04075(Plant hormone signal transduction);04626(Plant-pathogen interaction)	K13416	EC:2.7.10.1;EC:2.7.11.1	PREDICTED: probable L-type lectin-domain containing receptor kinase VII.2 [Malus domestica]	1.87315	5.24425	2.7997	1.48527	0.037027	0.258442
MD09G1251400	GO:0005515(protein binding)	03013(RNA transport)	K14309	NA	PREDICTED: disease resistance protein RML1A-like [Malus domestica]	6.04974	32.3667	5.35009	2.41956	0.000699127	0.0163968
MD09G1252100	GO:0005515(protein binding)	01200(Carbon metabolism);00630(Glyoxylate and dicarboxylate metabolism);00710(Carbon fixation in photosynthetic organisms)	K01602	EC:4.1.1.39	PREDICTED: ribulose bisphosphate carboxylase small chain, chloroplastic [Malus domestica]	1.45606	27.1674	18.6582	4.22174	3.60757e-08	6.34572e-06
MD09G1255200	GO:0004674(protein serine/threonine kinase activity);GO:0005886(plasma membrane);GO:0006468(protein phosphorylation);GO:0006952(defense response);GO:0009506(plasmodesma)	NA	NA	NA	PREDICTED: G-type lectin S-receptor-like serine/threonine-protein kinase At1g61500 isoform X1 [Malus domestica]	1.98206	7.44714	3.75726	1.90968	0.00827399	0.0985391
MD09G1265200	GO:0003674(molecular_function);GO:0005634(nucleus);GO:0005783(endoplasmic reticulum);GO:0008150(biological_process);GO:0016021(integral component of membrane)	NA	NA	NA	PREDICTED: uncharacterized protein LOC103959464 [Pyrus x bretschneideri]	7.75084	33.3798	4.3066	2.10655	0.00292311	0.0464527
MD09G1271100	GO:0000302(response to reactive oxygen species);GO:0003674(molecular_function);GO:0005737(cytoplasm);GO:0005782(peroxisomal matrix);GO:0006457(protein folding);GO:0009408(response to heat)	04141(Protein processing in endoplasmic reticulum)	K13993	NA	PREDICTED: 15.7 kDa heat shock protein, peroxisomal-like [Malus domestica]	27.2853	82.6722	3.02992	1.59928	0.0230487	0.193485
MD09G1272100	NA	NA	NA	NA	-	0.647756	3.37222	5.206	2.38018	0.000988291	0.021034
MD09G1276200	GO:0005737(cytoplasm);GO:0005886(plasma membrane);GO:0006950(response to stress);GO:0016020(membrane);GO:0016787(hydrolase activity)	NA	NA	NA	PREDICTED: universal stress protein PHOS32-like [Pyrus x bretschneideri]	10.512	236.767	22.5236	4.49336	4.47788e-09	1.08237e-06
MD09G1277500	GO:0000976(transcription regulatory region sequence-specific DNA binding);GO:0003677(DNA binding);GO:0003700(transcription factor activity, sequence-specific DNA binding);GO:0005515(protein binding);GO:0005634(nucleus);GO:0006351(transcription, DNA-templated);GO:0006355(regulation of transcription, DNA-templated);GO:0008289(lipid binding);GO:0009828(plant-type cell wall loosening);GO:0010091(tric…	NA	NA	NA	PREDICTED: homeobox-leucine zipper protein HDG11-like [Malus domestica]	2.70304	8.33006	3.08174	1.62374	0.0216614	0.185842
MD09G1282000	GO:0004674(protein serine/threonine kinase activity);GO:0005886(plasma membrane)	NA	NA	NA	PREDICTED: psbQ-like protein 3, chloroplastic [Malus domestica]	1.40849	9.1737	6.51316	2.70336	0.000193191	0.00619171
MD09G1284900	NA	NA	NA	NA	PREDICTED: uncharacterized protein LOC103420953 [Malus domestica]	1.43579	5.26893	3.66972	1.87567	0.00882886	0.102586
MD09G1285400	GO:0003700(transcription factor activity, sequence-specific DNA binding);GO:0005634(nucleus);GO:0006351(transcription, DNA-templated);GO:0006355(regulation of transcription, DNA-templated);GO:0009624(response to nematode);GO:0009733(response to auxin);GO:0043565(sequence-specific DNA binding)	04626(Plant-pathogen interaction)	K18834	NA	PREDICTED: probable WRKY transcription factor 23 [Malus domestica]	27.614	75.9384	2.75	1.45943	0.0382746	0.26318
MD10G1006500	GO:0005634(nucleus);GO:0006952(defense response);GO:0007165(signal transduction);GO:0043531(ADP binding)	04626(Plant-pathogen interaction)	K16225	NA	PREDICTED: TMV resistance protein N-like [Malus domestica]	0.917474	3.6626	3.99204	1.99713	0.00565725	0.0747338
MD10G1006900	GO:0006952(defense response);GO:0007165(signal transduction);GO:0043531(ADP binding)	03040(Spliceosome);04141(Protein processing in endoplasmic reticulum);04144(Endocytosis)	K03283	NA	PREDICTED: TMV resistance protein N-like isoform X3 [Pyrus x bretschneideri]	2.09395	5.91478	2.8247	1.4981	0.0353169	0.25143
MD10G1011000	GO:0003700(transcription factor activity, sequence-specific DNA binding);GO:0005634(nucleus);GO:0006355(regulation of transcription, DNA-templated);GO:0043565(sequence-specific DNA binding)	04075(Plant hormone signal transduction)	K14494	NA	PREDICTED: scarecrow-like protein 1 [Malus domestica]	18.7743	49.1211	2.61641	1.38759	0.0492175	0.302217
MD10G1013800	GO:0001666(response to hypoxia);GO:0004022(alcohol dehydrogenase (NAD) activity);GO:0005737(cytoplasm);GO:0005794(Golgi apparatus);GO:0005829(cytosol);GO:0005886(plasma membrane);GO:0006970(response to osmotic stress);GO:0008270(zinc ion binding);GO:0009409(response to cold);GO:0009413(response to flooding);GO:0009414(response to water deprivation);GO:0009651(response to salt stress);GO:0009737(r…	00010(Glycolysis / Gluconeogenesis);00071(Fatty acid degradation);00350(Tyrosine metabolism)	K00001	EC:1.1.1.1	PREDICTED: alcohol dehydrogenase [Malus domestica]	9.28556	108.197	11.6522	3.54253	1.48683e-06	0.000133855
MD10G1014500	GO:0001666(response to hypoxia);GO:0004022(alcohol dehydrogenase (NAD) activity);GO:0005737(cytoplasm);GO:0005794(Golgi apparatus);GO:0005829(cytosol);GO:0005886(plasma membrane);GO:0006970(response to osmotic stress);GO:0008270(zinc ion binding);GO:0009409(response to cold);GO:0009413(response to flooding);GO:0009414(response to water deprivation);GO:0009651(response to salt stress);GO:0009737(r…	00010(Glycolysis / Gluconeogenesis);00071(Fatty acid degradation);00592(alpha-Linolenic acid metabolism);00350(Tyrosine metabolism)	K18857	EC:1.1.1.1	PREDICTED: alcohol dehydrogenase 1 [Malus domestica]ADH1	0.962522	365.858	380.103	8.57025	7.70463e-21	5.87272e-17
MD10G1014800	GO:0006633(fatty acid biosynthetic process);GO:0009507(chloroplast);GO:0016020(membrane);GO:0045300(acyl-[acyl-carrier-protein] desaturase activity);GO:0046872(metal ion binding);GO:0055114(oxidation-reduction process)	01212(Fatty acid metabolism);00061(Fatty acid biosynthesis);01040(Biosynthesis of unsaturated fatty acids)	K03921	EC:1.14.19.2;EC:1.14.19.11	PREDICTED: stearoyl-[acyl-carrier-protein] 9-desaturase 6, chloroplastic-like [Malus domestica]硬脂酰- acp转化为油酰- acpN/A	2.52099	1999.6	793.178	9.6315	3.90047e-24	4.4596e-20
MD10G1022200	GO:0004089(carbonate dehydratase activity);GO:0005737(cytoplasm);GO:0005829(cytosol);GO:0008270(zinc ion binding);GO:0009507(chloroplast);GO:0009535(chloroplast thylakoid membrane);GO:0009570(chloroplast stroma);GO:0009941(chloroplast envelope);GO:0015976(carbon utilization);GO:0042742(defense response to bacterium);GO:0048046(apoplast)	00910(Nitrogen metabolism)	K01673	EC:4.2.1.1	PREDICTED: carbonic anhydrase 2-like isoform X1 [Pyrus x bretschneideri]	4.1888	12.3974	2.95965	1.56543	0.0272915	0.214621
MD10G1024300	GO:0003674(molecular_function);GO:0005634(nucleus);GO:0005829(cytosol);GO:0008150(biological_process)	NA	NA	NA	PREDICTED: protein FAM188A [Malus domestica]	15.963	88.2038	5.52553	2.46611	0.000519652	0.0129785
MD10G1029800	GO:0005886(plasma membrane);GO:0008270(zinc ion binding);GO:0009833(plant-type primary cell wall biogenesis);GO:0016021(integral component of membrane);GO:0016757(transferase activity, transferring glycosyl groups);GO:0016759(cellulose synthase activity);GO:0016760(cellulose synthase (UDP-forming) activity);GO:0030244(cellulose biosynthetic process);GO:0071555(cell wall organization)	00500(Starch and sucrose metabolism);00520(Amino sugar and nucleotide sugar metabolism)	K00770	EC:2.4.2.24	PREDICTED: cellulose synthase A catalytic subunit 2 [UDP-forming]-like [Malus domestica]	8.56253	65.1247	7.60578	2.9271	4.76082e-05	0.00216864
MD10G1032000	GO:0003677(DNA binding);GO:0003700(transcription factor activity, sequence-specific DNA binding);GO:0005634(nucleus);GO:0006351(transcription, DNA-templated);GO:0006355(regulation of transcription, DNA-templated);GO:0009873(ethylene-activated signaling pathway);GO:0045893(positive regulation of transcription, DNA-templated);GO:0048510(regulation of timing of transition from vegetative to reproduc…	04075(Plant hormone signal transduction)	K14517	NA	ethylene-responsive transcription factor ABR1-like [Malus domestica]	1.86358	7.78767	4.17887	2.06311	0.00386019	0.0564392
MD10G1033200	GO:0004674(protein serine/threonine kinase activity);GO:0005524(ATP binding);GO:0006468(protein phosphorylation);GO:0016021(integral component of membrane);GO:0016301(kinase activity);GO:0016310(phosphorylation)	04075(Plant hormone signal transduction)	K13415	EC:2.7.10.1;EC:2.7.11.1	PREDICTED: leucine-rich repeat receptor protein kinase EMS1-like [Malus domestica]	1.80726	6.42678	3.55609	1.83029	0.0108714	0.118068
MD10G1034200	GO:0005515(protein binding);GO:0005634(nucleus);GO:0005654(nucleoplasm);GO:0005737(cytoplasm);GO:0006355(regulation of transcription, DNA-templated);GO:0007623(circadian rhythm);GO:0009409(response to cold);GO:0009585(red, far-red light phototransduction);GO:0009637(response to blue light);GO:0009908(flower development);GO:0010218(response to far red light);GO:0010378(temperature compensation of …	04712(Circadian rhythm - plant)	K12124	NA	PREDICTED: protein GIGANTEA-like [Malus domestica]	4.43202	18.0021	4.06182	2.02213	0.00415259	0.0592373
MD10G1037200	NA	NA	NA	NA	PREDICTED: uncharacterized protein LOC103444725 isoform X2 [Malus domestica]	30.7179	81.3356	2.64782	1.40481	0.0463917	0.29378
MD10G1039000	GO:0005737(cytoplasm);GO:0006952(defense response);GO:0007165(signal transduction);GO:0016021(integral component of membrane);GO:0043531(ADP binding)	03040(Spliceosome);04141(Protein processing in endoplasmic reticulum);04144(Endocytosis)	K03283	NA	PREDICTED: TMV resistance protein N-like [Malus domestica]	1.7768	13.3233	7.49849	2.9066	5.73479e-05	0.00246499
MD10G1039500	GO:0005515(protein binding);GO:0005634(nucleus);GO:0005737(cytoplasm);GO:0005829(cytosol);GO:0006511(ubiquitin-dependent protein catabolic process);GO:0009408(response to heat);GO:0009734(auxin-activated signaling pathway);GO:0009867(jasmonic acid mediated signaling pathway);GO:0010187(negative regulation of seed germination);GO:0019005(SCF ubiquitin ligase complex);GO:0030163(protein catabolic p…	04626(Plant-pathogen interaction)	K12795	NA	PREDICTED: protein SUPPRESSOR OF npr1-1, CONSTITUTIVE 1-like [Pyrus x bretschneideri]	2.20687	8.37285	3.79399	1.92372	0.00705723	0.0878006
MD10G1041100	GO:0005515(protein binding)	03060(Protein export)	K03217	NA	flowering locus C-like protein [Pyrus pyrifolia var. culta]	1.42477	10.135	7.1134	2.83054	9.67325e-05	0.00364412
MD10G1045400	GO:0005886(plasma membrane);GO:0009507(chloroplast)	03040(Spliceosome);03013(RNA transport);03015(mRNA surveillance pathway)	K12812	EC:3.6.4.13	PREDICTED: uncharacterized protein LOC103964094 isoform X1 [Pyrus x bretschneideri]	0.6959	2.99272	4.30051	2.10451	0.00343057	0.0518486
MD10G1052800	GO:0051213(dioxygenase activity)	00941(Flavonoid biosynthesis)	K05278	EC:1.14.11.23	PREDICTED: protein DMR6-LIKE OXYGENASE 2-like [Malus domestica]	4.08279	30.907	7.57006	2.9203	5.37013e-05	0.00235253
MD10G1053000	GO:0051213(dioxygenase activity)	00941(Flavonoid biosynthesis)	K05278	EC:1.14.11.23	PREDICTED: protein DMR6-LIKE OXYGENASE 2-like [Malus domestica]	5.20241	36.9178	7.0963	2.82707	8.74774e-05	0.00335628
MD10G1053200	GO:0051213(dioxygenase activity)	00941(Flavonoid biosynthesis)	K05278	EC:1.14.11.23	PREDICTED: protein DMR6-LIKE OXYGENASE 2-like [Malus domestica]	3.80406	28.0576	7.37568	2.88278	6.49445e-05	0.00266622
MD10G1056900	GO:0003677(DNA binding);GO:0003887(DNA-directed DNA polymerase activity);GO:0005634(nucleus);GO:0005829(cytosol);GO:0006260(DNA replication);GO:0006351(transcription, DNA-templated)	NA	NA	NA	PREDICTED: DNA polymerase V-like [Malus domestica]	4.75494	14.1496	2.97576	1.57326	0.0255414	0.206599
MD10G1058000	GO:0005515(protein binding);GO:0006779(porphyrin-containing compound biosynthetic process);GO:0006782(protoporphyrinogen IX biosynthetic process);GO:0006783(heme biosynthetic process);GO:0008883(glutamyl-tRNA reductase activity);GO:0009416(response to light stimulus);GO:0009507(chloroplast);GO:0015995(chlorophyll biosynthetic process);GO:0031969(chloroplast membrane);GO:0043234(protein complex);G…	00860(Porphyrin and chlorophyll metabolism)	K02492	EC:1.2.1.70	PREDICTED: glutamyl-tRNA reductase 1, chloroplastic-like [Malus domestica]	3.02611	8.15539	2.69501	1.43029	0.043725	0.282526
MD10G1059200	GO:0003674(molecular_function);GO:0005886(plasma membrane);GO:0009409(response to cold);GO:0009507(chloroplast);GO:0009733(response to auxin)	04075(Plant hormone signal transduction)	K14488	NA	PREDICTED: auxin-induced protein 15A-like [Malus domestica]	34.9051	104.423	2.99163	1.58093	0.0251502	0.204884
MD10G1059600	GO:0003674(molecular_function);GO:0005739(mitochondrion);GO:0009733(response to auxin)	04075(Plant hormone signal transduction)	K14488	NA	PREDICTED: auxin-induced protein 15A-like [Malus domestica]	4.15364	25.436	6.12379	2.61442	0.000368753	0.0101471
MD10G1061800	GO:0003677(DNA binding);GO:0005634(nucleus);GO:0006352(DNA-templated transcription, initiation);GO:0006368(transcription elongation from RNA polymerase II promoter);GO:0009908(flower development);GO:0009910(negative regulation of flower development);GO:0016570(histone modification);GO:0016593(Cdc73/Paf1 complex);GO:0045893(positive regulation of transcription, DNA-templated)	NA	NA	NA	PREDICTED: protein RTF1 homolog [Malus domestica]	21.0584	72.4026	3.43818	1.78164	0.0112825	0.121296
MD10G1063600	GO:0004332(fructose-bisphosphate aldolase activity);GO:0006096(glycolytic process);GO:0006098(pentose-phosphate shunt);GO:0009507(chloroplast);GO:0009570(chloroplast stroma);GO:0009579(thylakoid);GO:0009737(response to abscisic acid);GO:0009941(chloroplast envelope);GO:0010287(plastoglobule);GO:0016020(membrane);GO:0046686(response to cadmium ion);GO:0048046(apoplast)	01200(Carbon metabolism);01230(Biosynthesis of amino acids);00010(Glycolysis / Gluconeogenesis);00030(Pentose phosphate pathway);00051(Fructose and mannose metabolism);00710(Carbon fixation in photosynthetic organisms)	K01623	EC:4.1.2.13	PREDICTED: fructose-bisphosphate aldolase 1, chloroplastic [Malus domestica]	9.90293	76.8667	7.76202	2.95643	4.10572e-05	0.00192784
MD10G1064900	GO:0004310(farnesyl-diphosphate farnesyltransferase activity);GO:0005783(endoplasmic reticulum);GO:0005789(endoplasmic reticulum membrane);GO:0005886(plasma membrane);GO:0008299(isoprenoid biosynthetic process);GO:0016021(integral component of membrane);GO:0016126(sterol biosynthetic process);GO:0016491(oxidoreductase activity);GO:0051996(squalene synthase activity);GO:0055114(oxidation-reduction…	00100(Steroid biosynthesis);00909(Sesquiterpenoid and triterpenoid biosynthesis)	K00801	EC:2.5.1.21	squalene synthase-like [Malus domestica]	15.8278	98.8932	6.24809	2.64341	0.000213262	0.0066987
MD10G1073000	GO:0000463(maturation of LSU-rRNA from tricistronic rRNA transcript (SSU-rRNA, 5.8S rRNA, LSU-rRNA));GO:0000466(maturation of 5.8S rRNA from tricistronic rRNA transcript (SSU-rRNA, 5.8S rRNA, LSU-rRNA));GO:0005730(nucleolus);GO:0008650(rRNA (uridine-2'-O-)-methyltransferase activity);GO:0016435(rRNA (guanine) methyltransferase activity);GO:0030687(preribosome, large subunit precursor);GO:0031167(…	NA	NA	NA	PREDICTED: putative rRNA methyltransferase [Malus domestica]	21.5368	57.3932	2.66489	1.41408	0.0448346	0.28726
MD10G1078500	GO:0000166(nucleotide binding);GO:0004017(adenylate kinase activity);GO:0005524(ATP binding);GO:0005575(cellular_component);GO:0005634(nucleus);GO:0006979(response to oxidative stress);GO:0016301(kinase activity);GO:0016310(phosphorylation);GO:0016740(transferase activity);GO:0016887(ATPase activity);GO:0030490(maturation of SSU-rRNA)	00230(Purine metabolism);03008(Ribosome biogenesis in eukaryotes)	K18532	EC:2.7.4.3	PREDICTED: adenylate kinase isoenzyme 6 homolog [Malus domestica]	10.9125	30.8161	2.82392	1.4977	0.0338168	0.245177
MD10G1081000	GO:0003674(molecular_function);GO:0005737(cytoplasm);GO:0008150(biological_process)	NA	NA	NA	PREDICTED: deSI-like protein At4g17486 [Malus domestica]	2.41018	8.23924	3.41851	1.77337	0.0126905	0.13125
MD10G1081600	GO:0003674(molecular_function);GO:0016021(integral component of membrane)	00600(Sphingolipid metabolism)	K00654	EC:2.3.1.50	PREDICTED: LOW QUALITY PROTEIN: UPF0496 protein At4g34320-like [Malus domestica]	1.94392	9.41801	4.84484	2.27645	0.00145006	0.0280291
MD10G1083800	GO:0003674(molecular_function);GO:0005515(protein binding);GO:0005739(mitochondrion);GO:0009536(plastid);GO:0031359(integral component of chloroplast outer membrane);GO:0043572(plastid fission)	NA	NA	NA	PREDICTED: plastid division protein PDV2-like [Malus domestica]	7.16532	25.5682	3.56833	1.83525	0.009356	0.106705
MD10G1086700	GO:0009496(plastoquinol--plastocyanin reductase activity);GO:0009507(chloroplast);GO:0009512(cytochrome b6f complex);GO:0009535(chloroplast thylakoid membrane);GO:0016021(integral component of membrane)	NA	NA	NA	PREDICTED: uncharacterized protein LOC103431760 [Malus domestica]	40.0405	125.8	3.14183	1.6516	0.0188976	0.168999
MD10G1090500	GO:0005634(nucleus);GO:0009416(response to light stimulus);GO:0009909(regulation of flower development)	NA	NA	NA	putative reverse transcriptase family member [Malus domestica]	1.07672	4.13052	3.83619	1.93967	0.00775464	0.094322
MD10G1103900	GO:0004871(signal transducer activity);GO:0005886(plasma membrane);GO:0009416(response to light stimulus);GO:0009958(positive gravitropism);GO:0016567(protein ubiquitination);GO:0071944(cell periphery)	NA	NA	NA	PREDICTED: BTB/POZ domain-containing protein NPY2 [Malus domestica]	1.4824	4.75178	3.20546	1.68053	0.019002	0.1698
MD10G1105800	GO:0000103(sulfate assimilation);GO:0004020(adenylylsulfate kinase activity)	00920(Sulfur metabolism);00230(Purine metabolism)	K00860	EC:2.7.1.25	PREDICTED: adenylyl-sulfate kinase 3-like [Malus domestica]	0.742036	2.16553	2.91836	1.54516	0.0335868	0.244206
MD10G1107900	GO:0051213(dioxygenase activity)	NA	NA	NA	PREDICTED: S-norcoclaurine synthase 1-like isoform X2 [Malus domestica]	2.46587	7.26718	2.94711	1.5593	0.0307268	0.231509
MD10G1115800	GO:0009813(flavonoid biosynthetic process);GO:0043231(intracellular membrane-bounded organelle);GO:0052696(flavonoid glucuronidation);GO:0080043(quercetin 3-O-glucosyltransferase activity);GO:0080044(quercetin 7-O-glucosyltransferase activity)	00940(Phenylpropanoid biosynthesis)	K13068	EC:2.4.1.120	PREDICTED: putative UDP-glucose glucosyltransferase [Malus domestica]	0.937818	3.7351	3.98275	1.99377	0.00596587	0.0777331
MD10G1120300	GO:0004040(amidase activity);GO:0016884(carbon-nitrogen ligase activity, with glutamine as amido-N-donor)	00330(Arginine and proline metabolism);00360(Phenylalanine metabolism);00380(Tryptophan metabolism)	K01426	EC:3.5.1.4	PREDICTED: putative amidase C869.01 isoform X1 [Malus domestica]	1.88264	6.29061	3.34137	1.74044	0.0145009	0.143733
MD10G1120800	GO:0004888(transmembrane signaling receptor activity);GO:0005525(GTP binding);GO:0009507(chloroplast);GO:0009536(plastid);GO:0009707(chloroplast outer membrane);GO:0015031(protein transport);GO:0016020(membrane);GO:0016021(integral component of membrane);GO:0016817(hydrolase activity, acting on acid anhydrides);GO:0045036(protein targeting to chloroplast);GO:0046872(metal ion binding)	NA	NA	NA	PREDICTED: translocase of chloroplast 120, chloroplastic-like [Malus domestica]	21.5387	61.6536	2.86245	1.51725	0.0310583	0.233144
MD10G1122400	GO:0009507(chloroplast);GO:0016021(integral component of membrane)	NA	NA	NA	PREDICTED: protein NUCLEAR FUSION DEFECTIVE 4-like [Malus domestica]	1.17515	8.72675	7.42605	2.8926	6.83821e-05	0.00278733
MD10G1126500	GO:0000166(nucleotide binding);GO:0003676(nucleic acid binding);GO:0003723(RNA binding);GO:0005634(nucleus);GO:0006397(mRNA processing)	03013(RNA transport);03015(mRNA surveillance pathway);03018(RNA degradation)	K13126	NA	PREDICTED: RNA-binding protein 39-like [Malus domestica]	17.089	48.1892	2.81989	1.49564	0.0336592	0.244655
MD10G1132000	GO:0005507(copper ion binding);GO:0009505(plant-type cell wall);GO:0009506(plasmodesma);GO:0016722(oxidoreductase activity, oxidizing metal ions)	00053(Ascorbate and aldarate metabolism)	K00423	EC:1.10.3.3	PREDICTED: L-ascorbate oxidase homolog [Malus domestica]	1.33761	12.7922	9.56348	3.25754	9.43444e-06	0.000584654
MD10G1143400	GO:0004420(hydroxymethylglutaryl-CoA reductase (NADPH) activity);GO:0005778(peroxisomal membrane);GO:0005789(endoplasmic reticulum membrane);GO:0008299(isoprenoid biosynthetic process);GO:0016126(sterol biosynthetic process)	00900(Terpenoid backbone biosynthesis)	K00021	EC:1.1.1.34	PREDICTED: 3-hydroxy-3-methylglutaryl-coenzyme A reductase 1-like [Malus domestica]	28.4661	166.922	5.86389	2.55186	0.000336863	0.00949503
MD10G1151400	GO:0005576(extracellular region);GO:0005773(vacuole);GO:0008150(biological_process)	NA	NA	NA	PREDICTED: uncharacterized protein LOC103429558 [Malus domestica]	1.03532	26.094	25.2039	4.65558	2.20051e-09	6.21223e-07
MD10G1156200	GO:0000139(Golgi membrane);GO:0005768(endosome);GO:0005794(Golgi apparatus);GO:0005802(trans-Golgi network);GO:0016021(integral component of membrane);GO:0016757(transferase activity, transferring glycosyl groups);GO:0016759(cellulose synthase activity);GO:0048868(pollen tube development);GO:0071555(cell wall organization)	NA	NA	NA	PREDICTED: probable xyloglucan glycosyltransferase 6 [Malus domestica]	1.14899	5.16505	4.49529	2.16841	0.00248743	0.0410687
MD10G1156600	GO:0004553(hydrolase activity, hydrolyzing O-glycosyl compounds);GO:0030247(polysaccharide binding);GO:0046658(anchored component of plasma membrane)	00500(Starch and sucrose metabolism)	K19891	EC:3.2.1.39	PREDICTED: probable glucan endo-1,3-beta-glucosidase A6 [Malus domestica]	0.909476	2.50366	2.75287	1.46093	0.0428659	0.279059
MD10G1156700	GO:0003674(molecular_function);GO:0008150(biological_process);GO:0009507(chloroplast)	NA	NA	NA	PREDICTED: UV-B-induced protein At3g17800, chloroplastic-like [Malus domestica]	3.88894	16.1101	4.14254	2.05052	0.00385534	0.0564044
MD10G1158000	GO:0004553(hydrolase activity, hydrolyzing O-glycosyl compounds);GO:0030247(polysaccharide binding);GO:0046658(anchored component of plasma membrane)	00500(Starch and sucrose metabolism)	K19891	EC:3.2.1.39	PREDICTED: probable glucan endo-1,3-beta-glucosidase A6 isoform X1 [Malus domestica]	0.850884	6.20877	7.29685	2.86727	9.11999e-05	0.00347
MD10G1158700	GO:0000139(Golgi membrane);GO:0005739(mitochondrion);GO:0005768(endosome);GO:0005794(Golgi apparatus);GO:0005802(trans-Golgi network);GO:0007155(cell adhesion);GO:0010289(homogalacturonan biosynthetic process);GO:0016021(integral component of membrane);GO:0016051(carbohydrate biosynthetic process);GO:0016757(transferase activity, transferring glycosyl groups);GO:0016758(transferase activity, tran…	00500(Starch and sucrose metabolism);00520(Amino sugar and nucleotide sugar metabolism)	K13648	EC:2.4.1.43	PREDICTED: galacturonosyltransferase 8-like [Malus domestica]	14.558	39.0747	2.68407	1.42442	0.0434375	0.281544
MD10G1160300	GO:0000036(ACP phosphopantetheine attachment site binding involved in fatty acid biosynthetic process);GO:0004320(oleoyl-[acyl-carrier-protein] hydrolase activity);GO:0006633(fatty acid biosynthetic process);GO:0009507(chloroplast);GO:0016295(myristoyl-[acyl-carrier-protein] hydrolase activity);GO:0016296(palmitoyl-[acyl-carrier-protein] hydrolase activity)	00061(Fatty acid biosynthesis)	K10782	EC:3.1.2.14	PREDICTED: oleoyl-acyl carrier protein thioesterase 1, chloroplastic-like isoform X1 [Malus domestica]	2.36411	9.28695	3.9283	1.9739	0.00547545	0.0730071
MD10G1165800	GO:0003924(GTPase activity);GO:0005730(nucleolus);GO:0042254(ribosome biogenesis)	03008(Ribosome biogenesis in eukaryotes)	K14538	NA	PREDICTED: guanine nucleotide-binding protein-like NSN1 [Malus domestica]	19.6032	63.6773	3.24831	1.69969	0.0156579	0.150188
MD10G1171000	NA	NA	NA	NA	hypothetical protein PRUPE_ppa003067mg [Prunus persica]	4.96587	17.4877	3.52158	1.81622	0.0100334	0.111647
MD10G1171400	GO:0003674(molecular_function);GO:0005634(nucleus);GO:0008150(biological_process)	NA	NA	NA	PREDICTED: uncharacterized protein LOC103445438 isoform X2 [Malus domestica]	4.8058	20.004	4.16248	2.05744	0.00356143	0.0531588
MD10G1175300	GO:0000325(plant-type vacuole);GO:0005524(ATP binding);GO:0005773(vacuole);GO:0005774(vacuolar membrane);GO:0005886(plasma membrane);GO:0008281(sulfonylurea receptor activity);GO:0008559(xenobiotic-transporting ATPase activity);GO:0009651(response to salt stress);GO:0016021(integral component of membrane);GO:0030007(cellular potassium ion homeostasis);GO:0042626(ATPase activity, coupled to transm…	02010(ABC transporters)	K05665	NA	PREDICTED: ABC transporter C family member 5-like [Malus domestica]	1.39368	5.84593	4.19459	2.06853	0.00349711	0.0525072
MD10G1176000	GO:0030096(plasma membrane-derived thylakoid photosystem II)	00195(Photosynthesis)	K08903	NA	PREDICTED: photosystem II reaction center PSB28 protein, chloroplastic-like [Malus domestica]	6.63985	19.1698	2.88708	1.52961	0.0307656	0.231573
MD10G1177700	GO:0003674(molecular_function);GO:0008150(biological_process);GO:0009507(chloroplast);GO:0016021(integral component of membrane)	NA	NA	NA	PREDICTED: uncharacterized endoplasmic reticulum membrane protein C16E8.02-like [Pyrus x bretschneideri]	1.51196	4.79498	3.17137	1.6651	0.0216575	0.185842
MD10G1181600	GO:0005768(endosome);GO:0005774(vacuolar membrane);GO:0005802(trans-Golgi network);GO:0008757(S-adenosylmethionine-dependent methyltransferase activity);GO:0032259(methylation)	NA	NA	NA	PREDICTED: probable methyltransferase PMT3 [Malus domestica]	4.72906	12.8176	2.71038	1.4385	0.0420763	0.276642
MD10G1184700	GO:0005887(integral component of plasma membrane);GO:0022891(substrate-specific transmembrane transporter activity)	NA	NA	NA	PREDICTED: probable inorganic phosphate transporter 1-7 [Pyrus x bretschneideri]	6.52529	34.1418	5.23223	2.38743	0.000777919	0.0175922
MD10G1191200	GO:0000786(nucleosome);GO:0003677(DNA binding);GO:0005634(nucleus);GO:0006334(nucleosome assembly)	NA	NA	NA	PREDICTED: histone H1 [Malus domestica]	13.5452	90.1129	6.65276	2.73395	0.000134337	0.00473325
MD10G1191900	GO:0015095(magnesium ion transmembrane transporter activity);GO:0015693(magnesium ion transport)	NA	NA	NA	PREDICTED: magnesium transporter MRS2-I-like [Malus domestica]	1.88342	6.56663	3.48655	1.8018	0.0114965	0.123144
MD10G1195700	GO:0005634(nucleus);GO:0005777(peroxisome);GO:0005829(cytosol);GO:0008891(glycolate oxidase activity);GO:0009506(plasmodesma);GO:0009507(chloroplast);GO:0009570(chloroplast stroma);GO:0009735(response to cytokinin);GO:0009854(oxidative photosynthetic carbon pathway);GO:0010181(FMN binding);GO:0016020(membrane);GO:0016491(oxidoreductase activity);GO:0022626(cytosolic ribosome);GO:0042742(defense r…	01200(Carbon metabolism);00630(Glyoxylate and dicarboxylate metabolism);04146(Peroxisome)	K11517	EC:1.1.3.15	PREDICTED: peroxisomal (S)-2-hydroxy-acid oxidase-like [Malus domestica]	14.9553	101.337	6.776	2.76043	0.000116112	0.00424823
MD10G1203200	GO:0003924(GTPase activity);GO:0005622(intracellular);GO:0006412(translation)	03040(Spliceosome)	K12852	NA	PREDICTED: elongation factor 2 [Malus domestica]	14.8798	38.818	2.60877	1.38337	0.049925	0.304924
MD10G1210600	GO:0004618(phosphoglycerate kinase activity);GO:0005524(ATP binding);GO:0005634(nucleus);GO:0005737(cytoplasm);GO:0005774(vacuolar membrane);GO:0005794(Golgi apparatus);GO:0005829(cytosol);GO:0005886(plasma membrane);GO:0006096(glycolytic process);GO:0009506(plasmodesma);GO:0009570(chloroplast stroma);GO:0016020(membrane);GO:0048046(apoplast)	01200(Carbon metabolism);01230(Biosynthesis of amino acids);00010(Glycolysis / Gluconeogenesis);00710(Carbon fixation in photosynthetic organisms)	K00927	EC:2.7.2.3	PREDICTED: phosphoglycerate kinase, cytosolic [Malus domestica]	158.375	543.751	3.4333	1.7796	0.0113331	0.121726
MD10G1213800	GO:0003938(IMP dehydrogenase activity);GO:0005829(cytosol);GO:0006177(GMP biosynthetic process);GO:0009735(response to cytokinin);GO:0046872(metal ion binding);GO:0055114(oxidation-reduction process)	00230(Purine metabolism)	K00088	EC:1.1.1.205	PREDICTED: inosine-5'-monophosphate dehydrogenase 2-like [Malus domestica]	40.0516	127.203	3.17597	1.6672	0.017719	0.161813
MD10G1219700	GO:0001709(cell fate determination);GO:0003677(DNA binding);GO:0003723(RNA binding);GO:0005634(nucleus);GO:0006397(mRNA processing);GO:0009908(flower development);GO:0016607(nuclear speck);GO:0046872(metal ion binding)	03013(RNA transport)	K03260	NA	PREDICTED: zinc finger CCCH domain-containing protein 37 isoform X1 [Malus domestica]	10.9988	29.6302	2.69396	1.42973	0.0427881	0.278915
MD10G1226900	GO:0008152(metabolic process);GO:0016787(hydrolase activity)	NA	NA	NA	PREDICTED: haloacid dehalogenase-like hydrolase domain-containing protein 3 [Malus domestica]	7.36883	20.736	2.81402	1.49263	0.0346592	0.249195
MD10G1227500	GO:0003723(RNA binding);GO:0005525(GTP binding);GO:0005829(cytosol);GO:0009507(chloroplast)	NA	NA	NA	PREDICTED: GTP-binding protein ERG-like isoform X1 [Pyrus x bretschneideri]	1.63851	6.31057	3.8514	1.94538	0.00639546	0.0818904
MD10G1234000	NA	NA	NA	NA	PREDICTED: cysteine-rich and transmembrane domain-containing protein A-like [Malus domestica]	2.08309	7.10851	3.41248	1.77082	0.0143271	0.142629
MD10G1244200	GO:0005886(plasma membrane);GO:0009055(electron carrier activity);GO:0009507(chloroplast);GO:0016614(oxidoreductase activity, acting on CH-OH group of donors);GO:0048046(apoplast);GO:0050660(flavin adenine dinucleotide binding);GO:0055114(oxidation-reduction process)	NA	NA	NA	PREDICTED: reticuline oxidase-like protein isoform X1 [Pyrus x bretschneideri]	4.1495	11.4562	2.76087	1.46512	0.038784	0.265018
MD10G1252200	GO:0001510(RNA methylation);GO:0003723(RNA binding);GO:0005634(nucleus);GO:0005737(cytoplasm);GO:0008171(O-methyltransferase activity);GO:0008173(RNA methyltransferase activity);GO:0009616(virus induced gene silencing);GO:0009909(regulation of flower development);GO:0010093(specification of floral organ identity);GO:0010305(leaf vascular tissue pattern formation);GO:0010589(leaf proximal/distal p…	NA	NA	NA	PREDICTED: small RNA 2'-O-methyltransferase-like [Malus domestica]	0.939989	3.30184	3.51263	1.81255	0.0110186	0.119244
MD10G1252900	GO:0005524(ATP binding);GO:0005739(mitochondrion);GO:0005777(peroxisome);GO:0005778(peroxisomal membrane);GO:0008756(o-succinylbenzoate-CoA ligase activity);GO:0009507(chloroplast);GO:0016021(integral component of membrane);GO:0016208(AMP binding);GO:0031969(chloroplast membrane);GO:0042372(phylloquinone biosynthetic process)	00130(Ubiquinone and other terpenoid-quinone biosynthesis)	K14760	EC:6.2.1.26	PREDICTED: 2-succinylbenzoate--CoA ligase, chloroplastic/peroxisomal [Malus domestica]	1.21355	3.489	2.87505	1.52358	0.0338133	0.245177
MD10G1254000	GO:0006364(rRNA processing);GO:0030515(snoRNA binding);GO:0032040(small-subunit processome)	NA	NA	NA	PREDICTED: U3 snoRNP-associated protein-like YAO [Malus domestica]	1.77669	5.15625	2.90217	1.53713	0.0307415	0.231544
MD10G1254200	NA	NA	NA	NA	PREDICTED: 187-kDa microtubule-associated protein AIR9-like [Malus domestica]	1.99722	7.00718	3.50847	1.81084	0.0102845	0.113491
MD10G1254300	GO:0005313(L-glutamate transmembrane transporter activity);GO:0005887(integral component of plasma membrane);GO:0015189(L-lysine transmembrane transporter activity);GO:0015297(antiporter activity);GO:0043091(L-arginine import);GO:0051938(L-glutamate import);GO:1903401(L-lysine transmembrane transport)	NA	NA	NA	PREDICTED: cationic amino acid transporter 1-like [Malus domestica]	2.33887	11.3495	4.85257	2.27875	0.00138405	0.0272132
MD10G1258000	GO:0003677(DNA binding);GO:0005737(cytoplasm);GO:0005886(plasma membrane)	NA	NA	NA	PREDICTED: uncharacterized protein LOC103435025 [Malus domestica]	2.21686	9.06869	4.09078	2.03238	0.00424855	0.0602077
MD10G1259600	GO:0003674(molecular_function);GO:0005634(nucleus);GO:0010286(heat acclimation)	NA	NA	NA	PREDICTED: F-box protein At5g46170-like [Pyrus x bretschneideri]	3.90528	12.4657	3.19202	1.67447	0.0178623	0.162667
MD10G1265300	GO:0009416(response to light stimulus);GO:0009535(chloroplast thylakoid membrane);GO:0009768(photosynthesis, light harvesting in photosystem I);GO:0009941(chloroplast envelope);GO:0010287(plastoglobule);GO:0016168(chlorophyll binding);GO:0031409(pigment binding)	00196(Photosynthesis - antenna proteins)	K08912	NA	PREDICTED: chlorophyll a-b binding protein of LHCII type 1-like [Malus domestica]	4.77865	74.6576	15.6232	3.96562	1.29766e-07	1.80937e-05
MD10G1268800	GO:0003677(DNA binding);GO:0005634(nucleus);GO:0006351(transcription, DNA-templated);GO:0006355(regulation of transcription, DNA-templated)	03022(Basal transcription factors)	K03125	NA	PREDICTED: transcription factor GTE12-like isoform X1 [Malus domestica]	29.4474	129.441	4.39568	2.13609	0.00246513	0.0408479
MD10G1268900	GO:0004420(hydroxymethylglutaryl-CoA reductase (NADPH) activity);GO:0005778(peroxisomal membrane);GO:0005789(endoplasmic reticulum membrane);GO:0008299(isoprenoid biosynthetic process);GO:0016126(sterol biosynthetic process)	00900(Terpenoid backbone biosynthesis)	K00021	EC:1.1.1.34	3-hydroxy-3-methylglutaryl coenzyme A reductase, partial [Malus domestica]	15.3191	113.528	7.41089	2.88965	6.088e-05	0.00257052
MD10G1273000	GO:0004674(protein serine/threonine kinase activity);GO:0005886(plasma membrane)	04075(Plant hormone signal transduction);04626(Plant-pathogen interaction)	K13416	EC:2.7.10.1;EC:2.7.11.1	PREDICTED: probable LRR receptor-like serine/threonine-protein kinase At1g07650 isoform X1 [Malus domestica]	5.65157	31.3556	5.54813	2.472	0.000509508	0.0128032
MD10G1273200	GO:0004674(protein serine/threonine kinase activity);GO:0005886(plasma membrane)	04075(Plant hormone signal transduction);04626(Plant-pathogen interaction)	K13416	EC:2.7.10.1;EC:2.7.11.1	hypothetical protein PRUPE_ppa000742mg [Prunus persica]	6.24368	54.3423	8.70357	3.12161	1.64779e-05	0.000909483
MD10G1273300	GO:0004674(protein serine/threonine kinase activity);GO:0005886(plasma membrane)	04075(Plant hormone signal transduction);04626(Plant-pathogen interaction)	K13416	EC:2.7.10.1;EC:2.7.11.1	PREDICTED: probable LRR receptor-like serine/threonine-protein kinase At1g07650 [Malus domestica]	0.723235	2.2276	3.08005	1.62296	0.0234409	0.196202
MD10G1273400	GO:0004674(protein serine/threonine kinase activity);GO:0005886(plasma membrane)	00520(Amino sugar and nucleotide sugar metabolism)	K01183	EC:3.2.1.14	PREDICTED: probable LRR receptor-like serine/threonine-protein kinase RFK1 isoform X1 [Pyrus x bretschneideri]	5.76426	46.2921	8.03089	3.00556	3.13496e-05	0.00156181
MD10G1284500	GO:0005516(calmodulin binding);GO:0005634(nucleus);GO:0005886(plasma membrane);GO:0008150(biological_process)	03015(mRNA surveillance pathway)	K14411	NA	PREDICTED: protein IQ-DOMAIN 1-like [Malus domestica]	1.97349	6.00941	3.04506	1.60647	0.0245472	0.201769
MD10G1289200	GO:0005737(cytoplasm);GO:0006457(protein folding);GO:0051082(unfolded protein binding)	04141(Protein processing in endoplasmic reticulum)	K09503	NA	PREDICTED: LOW QUALITY PROTEIN: dnaJ homolog subfamily B member 1-like [Malus domestica]	2.72585	13.8377	5.07647	2.34383	0.00103534	0.0218203
MD10G1290100	NA	NA	NA	NA	Uncharacterized protein TCM_029816 [Theobroma cacao]	1.53521	5.78147	3.76593	1.91301	0.00906099	0.104277
MD10G1297600	GO:0000398(mRNA splicing, via spliceosome);GO:0005684(U2-type spliceosomal complex);GO:0005686(U2 snRNP);GO:0005689(U12-type spliceosomal complex);GO:0071011(precatalytic spliceosome);GO:0071013(catalytic step 2 spliceosome)	03040(Spliceosome)	K12829	NA	PREDICTED: splicing factor 3B subunit 2 [Malus domestica]	16.5792	73.4838	4.4323	2.14805	0.00235167	0.0396283
MD10G1297800	NA	NA	NA	NA	-	6.40845	21.4773	3.3514	1.74477	0.0152072	0.147958
MD10G1299600	GO:0005886(plasma membrane);GO:0006952(defense response)	NA	NA	NA	PREDICTED: uncharacterized protein LOC103446447 [Malus domestica]	3.34321	15.1796	4.54043	2.18283	0.002061	0.0359488
MD10G1301800	GO:0003677(DNA binding);GO:0005096(GTPase activator activity);GO:0005634(nucleus);GO:0005768(endosome);GO:0005802(trans-Golgi network);GO:0005829(cytosol);GO:0010227(floral organ abscission);GO:0046872(metal ion binding)	04144(Endocytosis)	K12486	NA	PREDICTED: probable ADP-ribosylation factor GTPase-activating protein AGD5 isoform X2 [Malus domestica]	2.23376	12.664	5.66937	2.50319	0.00047764	0.0122036
MD10G1302000	GO:0003677(DNA binding);GO:0005096(GTPase activator activity);GO:0005634(nucleus);GO:0005768(endosome);GO:0005802(trans-Golgi network);GO:0005829(cytosol);GO:0010227(floral organ abscission);GO:0046872(metal ion binding)	04144(Endocytosis)	K12486	NA	PREDICTED: probable ADP-ribosylation factor GTPase-activating protein AGD5 isoform X1 [Malus domestica]	2.04327	9.82334	4.80766	2.26534	0.00184069	0.0329868
MD10G1306600	GO:0004674(protein serine/threonine kinase activity);GO:0005886(plasma membrane);GO:0006468(protein phosphorylation);GO:0006952(defense response);GO:0009506(plasmodesma)	00520(Amino sugar and nucleotide sugar metabolism)	K01183	EC:3.2.1.14	PREDICTED: G-type lectin S-receptor-like serine/threonine-protein kinase B120 [Malus domestica]	0.918275	2.69503	2.93488	1.5533	0.0306253	0.231201
MD10G1311200	GO:0003824(catalytic activity);GO:0004252(serine-type endopeptidase activity);GO:0005618(cell wall);GO:0005634(nucleus);GO:0008152(metabolic process);GO:0009408(response to heat);GO:0010286(heat acclimation);GO:0010608(posttranscriptional regulation of gene expression)	NA	NA	NA	hypothetical protein PRUPE_ppa009599mg [Prunus persica]	4.16257	11.6934	2.80918	1.49015	0.0358962	0.253894
MD10G1311900	GO:0000103(sulfate assimilation);GO:0005829(cytosol);GO:0005886(plasma membrane);GO:0006457(protein folding);GO:0015035(protein disulfide oxidoreductase activity);GO:0016671(oxidoreductase activity, acting on a sulfur group of donors, disulfide as acceptor);GO:0034599(cellular response to oxidative stress);GO:0045454(cell redox homeostasis);GO:0055114(oxidation-reduction process)	NA	NA	NA	PREDICTED: thioredoxin-like protein CXXS1 [Malus domestica]	5.99196	161.62	26.9728	4.75343	8.7553e-10	2.70551e-07
MD10G1313600	GO:0004674(protein serine/threonine kinase activity);GO:0005886(plasma membrane);GO:0006468(protein phosphorylation);GO:0006952(defense response);GO:0009506(plasmodesma)	00520(Amino sugar and nucleotide sugar metabolism)	K01183	EC:3.2.1.14	PREDICTED: cysteine-rich receptor-like protein kinase 15 [Pyrus x bretschneideri]	1.43943	5.93068	4.12017	2.0427	0.00416571	0.0593503
MD10G1315000	GO:0003674(molecular_function);GO:0005737(cytoplasm);GO:0008150(biological_process)	NA	NA	NA	hypothetical protein PRUPE_ppa016425mg, partial [Prunus persica]	3.4791	11.582	3.32903	1.7351	0.015225	0.147978
MD10G1315100	GO:0004553(hydrolase activity, hydrolyzing O-glycosyl compounds);GO:0005576(extracellular region);GO:0005618(cell wall);GO:0010411(xyloglucan metabolic process);GO:0016762(xyloglucan:xyloglucosyl transferase activity);GO:0016798(hydrolase activity, acting on glycosyl bonds);GO:0042546(cell wall biogenesis);GO:0048046(apoplast);GO:0071555(cell wall organization)	04075(Plant hormone signal transduction)	K14504	EC:2.4.1.207	PREDICTED: probable xyloglucan endotransglucosylase/hydrolase protein 8 [Malus domestica]	6.20923	44.0022	7.08657	2.82509	8.5617e-05	0.00331831
MD10G1319000	GO:0006995(cellular response to nitrogen starvation)	04140(Regulation of autophagy)	K08341	NA	PREDICTED: uncharacterized protein LOC103446863 [Malus domestica]	3.45397	16.4013	4.74854	2.24748	0.00157262	0.0296545
MD10G1322200	NA	NA	NA	NA	hypothetical protein PRUPE_ppb011733mg [Prunus persica]	13.7291	42.3239	3.08279	1.62424	0.0217403	0.186262
MD10G1323000	GO:0000103(sulfate assimilation);GO:0009507(chloroplast);GO:0009973(adenylyl-sulfate reductase activity);GO:0016671(oxidoreductase activity, acting on a sulfur group of donors, disulfide as acceptor);GO:0019344(cysteine biosynthetic process);GO:0019419(sulfate reduction);GO:0033741(adenylyl-sulfate reductase (glutathione) activity);GO:0045454(cell redox homeostasis);GO:0046872(metal ion binding);…	00920(Sulfur metabolism)	K05907	EC:1.8.4.9	PREDICTED: 5'-adenylylsulfate reductase 3, chloroplastic-like [Malus domestica]	18.0668	57.3434	3.17396	1.66628	0.0178444	0.162634
MD10G1323500	GO:0005507(copper ion binding);GO:0009505(plant-type cell wall);GO:0009506(plasmodesma);GO:0016722(oxidoreductase activity, oxidizing metal ions)	00053(Ascorbate and aldarate metabolism)	K00423	EC:1.10.3.3	PREDICTED: L-ascorbate oxidase homolog [Malus domestica]	0.586708	3.10128	5.28589	2.40215	0.000946169	0.0203729
MD10G1325700	GO:0003700(transcription factor activity, sequence-specific DNA binding);GO:0005634(nucleus);GO:0008270(zinc ion binding)	03010(Ribosome)	K02987	NA	PREDICTED: lysine-specific demethylase JMJ25-like isoform X2 [Malus domestica]	0.887868	5.4892	6.18245	2.62818	0.000274285	0.00816651
MD10G1325800	GO:0005227(calcium activated cation channel activity);GO:0005886(plasma membrane);GO:0006812(cation transport);GO:0016021(integral component of membrane)	NA	NA	NA	PREDICTED: calcium permeable stress-gated cation channel 1 [Malus domestica]	0.749793	4.32257	5.76502	2.52732	0.000457222	0.0118945
MD10G1325900	GO:0009409(response to cold);GO:0009414(response to water deprivation);GO:0009534(chloroplast thylakoid);GO:0009651(response to salt stress);GO:0044183(protein binding involved in protein folding);GO:0061077(chaperone-mediated protein folding)	NA	NA	NA	PREDICTED: uncharacterized protein LOC103446745 [Malus domestica]	1.28459	8.40451	6.54257	2.70986	0.000225529	0.00696916
MD10G1328500	GO:0005654(nucleoplasm);GO:0032436(positive regulation of proteasomal ubiquitin-dependent protein catabolic process);GO:0061630(ubiquitin protein ligase activity)	04120(Ubiquitin mediated proteolysis);04712(Circadian rhythm - plant)	K10143	EC:2.3.2.27	constitutive photomorphogenic 1 [Malus domestica]	6.58481	18.2257	2.76784	1.46876	0.0373315	0.259471
MD10G1333600	GO:0005215(transporter activity);GO:0016021(integral component of membrane);GO:0098656(anion transmembrane transport)	NA	NA	NA	PREDICTED: tonoplast dicarboxylate transporter-like isoform X1 [Pyrus x bretschneideri]	1.94828	8.72946	4.4806	2.16369	0.00287904	0.0459101
MD10G1335000	GO:0005576(extracellular region);GO:0007275(multicellular organism development);GO:0016020(membrane);GO:0016021(integral component of membrane);GO:0046872(metal ion binding);GO:0055114(oxidation-reduction process)	NA	NA	NA	PREDICTED: cytochrome b561 and DOMON domain-containing protein At5g47530 [Malus domestica]	8.89311	38.9491	4.3797	2.13083	0.00256225	0.0419706
MD10G1336700	GO:0003674(molecular_function);GO:0008150(biological_process)	NA	NA	NA	PREDICTED: uncharacterized protein LOC103963746 isoform X1 [Pyrus x bretschneideri]	1.27832	7.82972	6.12499	2.61471	0.00031528	0.00903447
MD10G1337500	GO:0005737(cytoplasm);GO:0030001(metal ion transport);GO:0046914(transition metal ion binding);GO:0046916(cellular transition metal ion homeostasis)	NA	NA	NA	PREDICTED: pollen-specific leucine-rich repeat extensin-like protein 4 isoform X1 [Malus domestica]	5.63687	80.4189	14.2666	3.83457	2.87415e-07	3.49591e-05
MD10G1338300	GO:0000103(sulfate assimilation);GO:0005737(cytoplasm);GO:0006457(protein folding);GO:0015035(protein disulfide oxidoreductase activity);GO:0016671(oxidoreductase activity, acting on a sulfur group of donors, disulfide as acceptor);GO:0034599(cellular response to oxidative stress);GO:0045454(cell redox homeostasis);GO:0055114(oxidation-reduction process)	NA	NA	NA	PREDICTED: uncharacterized protein LOC103446811 [Malus domestica]	2.40684	6.62463	2.75241	1.4607	0.0411068	0.273153
MD11G1001400	GO:0000287(magnesium ion binding);GO:0004743(pyruvate kinase activity);GO:0005737(cytoplasm);GO:0005829(cytosol);GO:0006096(glycolytic process);GO:0016301(kinase activity);GO:0030955(potassium ion binding)	01200(Carbon metabolism);01230(Biosynthesis of amino acids);00010(Glycolysis / Gluconeogenesis);00620(Pyruvate metabolism);00230(Purine metabolism)	K00873	EC:2.7.1.40	PREDICTED: pyruvate kinase, cytosolic isozyme [Malus domestica]	62.9951	262.397	4.16535	2.05844	0.00353185	0.0529042
MD11G1001500	GO:0000287(magnesium ion binding);GO:0004743(pyruvate kinase activity);GO:0005737(cytoplasm);GO:0005829(cytosol);GO:0006096(glycolytic process);GO:0016301(kinase activity);GO:0030955(potassium ion binding)	01200(Carbon metabolism);01230(Biosynthesis of amino acids);00010(Glycolysis / Gluconeogenesis);00620(Pyruvate metabolism);00230(Purine metabolism)	K00873	EC:2.7.1.40	PREDICTED: pyruvate kinase, cytosolic isozyme [Malus domestica]	58.2723	258.288	4.43244	2.1481	0.00234864	0.0396064
MD11G1001600	GO:0000287(magnesium ion binding);GO:0004743(pyruvate kinase activity);GO:0005737(cytoplasm);GO:0005829(cytosol);GO:0006096(glycolytic process);GO:0016301(kinase activity);GO:0030955(potassium ion binding)	01200(Carbon metabolism);01230(Biosynthesis of amino acids);00010(Glycolysis / Gluconeogenesis);00620(Pyruvate metabolism);00230(Purine metabolism)	K00873	EC:2.7.1.40	PREDICTED: pyruvate kinase, cytosolic isozyme [Malus domestica]	35.8242	160.639	4.4841	2.16482	0.00217637	0.0373627
MD11G1002400	GO:0003723(RNA binding);GO:0005515(protein binding);GO:0005634(nucleus);GO:0005737(cytoplasm);GO:0005829(cytosol)	04141(Protein processing in endoplasmic reticulum)	K09503	NA	PREDICTED: uncharacterized protein LOC103429778 isoform X1 [Malus domestica]	91.1523	238.328	2.61461	1.3866	0.0491392	0.302016
MD11G1003600	GO:0003674(molecular_function);GO:0005634(nucleus);GO:0008150(biological_process)	NA	NA	NA	PREDICTED: uncharacterized protein LOC103931430 [Pyrus x bretschneideri]	2.8489	7.69941	2.70259	1.43434	0.0443197	0.284999
MD11G1014500	GO:0009507(chloroplast);GO:0009534(chloroplast thylakoid);GO:0009535(chloroplast thylakoid membrane);GO:0009561(megagametogenesis);GO:0010027(thylakoid membrane organization);GO:0031072(heat shock protein binding);GO:0046872(metal ion binding);GO:0051082(unfolded protein binding)	03018(RNA degradation)	K12603	EC:3.1.13.4	Chaperone DnaJ [Gossypium arboreum]	8.69739	46.6611	5.36496	2.42357	0.000695008	0.016317
MD11G1021300	GO:0004674(protein serine/threonine kinase activity);GO:0005886(plasma membrane);GO:0006468(protein phosphorylation)	00260(Glycine, serine and threonine metabolism);00350(Tyrosine metabolism);00360(Phenylalanine metabolism);00410(beta-Alanine metabolism);00950(Isoquinoline alkaloid biosynthesis);00960(Tropane, piperidine and pyridine alkaloid biosynthesis)	K00276	EC:1.4.3.21	PREDICTED: G-type lectin S-receptor-like serine/threonine-protein kinase LECRK4 [Malus domestica]	1.69855	7.27974	4.28585	2.09958	0.00362034	0.0537539
MD11G1022600	GO:0004674(protein serine/threonine kinase activity);GO:0005886(plasma membrane);GO:0006468(protein phosphorylation);GO:0006952(defense response);GO:0009506(plasmodesma)	00520(Amino sugar and nucleotide sugar metabolism)	K01183	EC:3.2.1.14	PREDICTED: cysteine-rich receptor-like protein kinase 10 [Malus domestica]	0.492877	2.13601	4.33376	2.11562	0.00373605	0.0549757
MD11G1028400	GO:0005739(mitochondrion);GO:0009507(chloroplast)	NA	NA	NA	PREDICTED: pentatricopeptide repeat-containing protein At3g42630 isoform X3 [Pyrus x bretschneideri]	1.26056	3.70623	2.94015	1.55589	0.0295165	0.225586
MD11G1038800	GO:0004849(uridine kinase activity);GO:0005829(cytosol);GO:0006206(pyrimidine nucleobase metabolic process);GO:0043097(pyrimidine nucleoside salvage)	00240(Pyrimidine metabolism)	K00876	EC:2.7.1.48	PREDICTED: uridine kinase-like protein 3 [Malus domestica]	36.5479	148.228	4.05572	2.01996	0.0041359	0.0590359
MD11G1038900	GO:0004332(fructose-bisphosphate aldolase activity);GO:0005737(cytoplasm);GO:0006096(glycolytic process);GO:0009507(chloroplast)	01200(Carbon metabolism);01230(Biosynthesis of amino acids);00010(Glycolysis / Gluconeogenesis);00030(Pentose phosphate pathway);00051(Fructose and mannose metabolism);00710(Carbon fixation in photosynthetic organisms)	K01623	EC:4.1.2.13	PREDICTED: fructose-bisphosphate aldolase, cytoplasmic isozyme 1 [Malus domestica]	2.56942	18.9985	7.39409	2.88637	6.64491e-05	0.00271338
MD11G1041400	GO:0006457(protein folding);GO:0009507(chloroplast)	00240(Pyrimidine metabolism);00250(Alanine, aspartate and glutamate metabolism)	K01956	EC:6.3.5.5	PREDICTED: chaperone protein dnaJ 11, chloroplastic-like [Malus domestica]	4.84642	19.2818	3.97857	1.99225	0.00549839	0.0731423
MD11G1044300	NA	NA	NA	NA	-	1.66627	4.8068	2.88476	1.52845	0.0381107	0.262493
MD11G1046500	GO:0005634(nucleus)	NA	NA	NA	PREDICTED: uncharacterized protein LOC103422751 [Malus domestica]	18.1949	50.85	2.79474	1.48271	0.0351734	0.250762
MD11G1051400	GO:0004871(signal transducer activity);GO:0005634(nucleus);GO:0005737(cytoplasm);GO:0005886(plasma membrane);GO:0007165(signal transduction);GO:0009638(phototropism);GO:0016567(protein ubiquitination)	00902(Monoterpenoid biosynthesis)	K15095	EC:1.1.1.208	root phototropism protein 2-like [Malus domestica]	4.66991	30.7981	6.59502	2.72138	0.00014719	0.00507662
MD11G1052100	GO:0003677(DNA binding);GO:0003700(transcription factor activity, sequence-specific DNA binding);GO:0005515(protein binding);GO:0005634(nucleus);GO:0005737(cytoplasm);GO:0006351(transcription, DNA-templated);GO:0006355(regulation of transcription, DNA-templated);GO:0009736(cytokinin-activated signaling pathway);GO:0009873(ethylene-activated signaling pathway);GO:0042991(transcription factor impor…	04626(Plant-pathogen interaction)	K13434	NA	PREDICTED: pathogenesis-related genes transcriptional activator PTI6-like [Malus domestica]	2.69503	7.63943	2.83463	1.50316	0.0357089	0.25296
MD11G1052900	GO:0009808(lignin metabolic process);GO:0016020(membrane);GO:0016710(trans-cinnamate 4-monooxygenase activity);GO:0044550(secondary metabolite biosynthetic process)	00360(Phenylalanine metabolism);00130(Ubiquinone and other terpenoid-quinone biosynthesis);00940(Phenylpropanoid biosynthesis);00945(Stilbenoid, diarylheptanoid and gingerol biosynthesis);00941(Flavonoid biosynthesis)	K00487	EC:1.14.13.11	PREDICTED: trans-cinnamate 4-monooxygenase [Pyrus x bretschneideri]	180.555	516.118	2.85851	1.51526	0.031216	0.233615
MD11G1054600	GO:0005515(protein binding);GO:0005524(ATP binding);GO:0005576(extracellular region);GO:0006952(defense response);GO:0043531(ADP binding)	03040(Spliceosome)	K12818	EC:3.6.4.13	PREDICTED: putative disease resistance protein RGA4 isoform X1 [Pyrus x bretschneideri]	0.437493	1.88308	4.30425	2.10576	0.00337141	0.0511234
MD11G1055800	GO:0005515(protein binding);GO:0005524(ATP binding);GO:0005576(extracellular region);GO:0006952(defense response);GO:0043531(ADP binding)	03040(Spliceosome)	K12818	EC:3.6.4.13	PREDICTED: putative disease resistance protein At3g14460 isoform X1 [Malus domestica]	0.321577	1.00261	3.11778	1.64052	0.0239514	0.198801
MD11G1062500	GO:0009813(flavonoid biosynthetic process);GO:0043231(intracellular membrane-bounded organelle);GO:0052696(flavonoid glucuronidation);GO:0080043(quercetin 3-O-glucosyltransferase activity);GO:0080044(quercetin 7-O-glucosyltransferase activity)	00908(Zeatin biosynthesis)	NA	NA	PREDICTED: UDP-glycosyltransferase 87A1-like [Malus domestica]	1.84936	8.35332	4.51687	2.17532	0.00240281	0.0401939
MD11G1064700	GO:0003824(catalytic activity);GO:0005829(cytosol);GO:0009809(lignin biosynthetic process);GO:0016621(cinnamoyl-CoA reductase activity);GO:0050662(coenzyme binding)	00940(Phenylpropanoid biosynthesis)	K09753	EC:1.2.1.44	PREDICTED: cinnamoyl-CoA reductase 1 isoform X1 [Pyrus x bretschneideri]	5.54578	23.5474	4.246	2.0861	0.00326268	0.0499048
MD11G1065800	NA	NA	NA	NA	PREDICTED: LRR repeats and ubiquitin-like domain-containing protein At2g30105 [Malus domestica]	2.26849	6.29628	2.77554	1.47277	0.0388556	0.265018
MD11G1066000	GO:0004672(protein kinase activity);GO:0005524(ATP binding);GO:0005886(plasma membrane);GO:0006468(protein phosphorylation);GO:0016021(integral component of membrane);GO:0016301(kinase activity);GO:0016310(phosphorylation)	04626(Plant-pathogen interaction)	K13436	EC:2.7.11.1	PREDICTED: probable inactive receptor-like protein kinase At3g56050 [Malus domestica]	0.627301	3.1182	4.97081	2.31348	0.00140535	0.02742
MD11G1066100	GO:0005634(nucleus);GO:0009693(ethylene biosynthetic process);GO:0010182(sugar mediated signaling pathway);GO:0010364(regulation of ethylene biosynthetic process);GO:0016036(cellular response to phosphate starvation);GO:0017145(stem cell division);GO:0030674(protein binding, bridging);GO:0043161(proteasome-mediated ubiquitin-dependent protein catabolic process);GO:2000069(regulation of post-embry…	NA	NA	NA	PREDICTED: ethylene-overproduction protein 1 [Malus domestica]	2.26018	7.39295	3.27095	1.70971	0.0155892	0.14997
MD11G1068000	GO:0005385(zinc ion transmembrane transporter activity);GO:0005886(plasma membrane);GO:0071577(zinc II ion transmembrane transport)	NA	NA	NA	PREDICTED: zinc transporter 6, chloroplastic-like [Malus domestica]	1.12211	4.74839	4.23167	2.08123	0.00396177	0.0574834
MD11G1076600	GO:0009813(flavonoid biosynthetic process);GO:0043231(intracellular membrane-bounded organelle);GO:0052696(flavonoid glucuronidation);GO:0080043(quercetin 3-O-glucosyltransferase activity);GO:0080044(quercetin 7-O-glucosyltransferase activity)	00942(Anthocyanin biosynthesis)	K12938	EC:2.4.1.-	PREDICTED: UDP-glycosyltransferase 71K1 isoform X1 [Malus domestica]	5.60327	20.8205	3.71578	1.89366	0.00738815	0.0907913
MD11G1079600	GO:0005506(iron ion binding);GO:0005773(vacuole);GO:0006631(fatty acid metabolic process);GO:0010345(suberin biosynthetic process);GO:0016021(integral component of membrane);GO:0018685(alkane 1-monooxygenase activity);GO:0019825(oxygen binding);GO:0020037(heme binding);GO:0055114(oxidation-reduction process)	00073(Cutin, suberine and wax biosynthesis)	K15401	EC:1.14.-.-	PREDICTED: cytochrome P450 86A1-like [Malus domestica]	0.843045	2.67982	3.17874	1.66845	0.0212351	0.182963
MD11G1079700	GO:0009507(chloroplast);GO:0009534(chloroplast thylakoid);GO:0009535(chloroplast thylakoid membrane);GO:0009579(thylakoid);GO:0009941(chloroplast envelope)	NA	NA	NA	PREDICTED: uncharacterized protein LOC103963214 [Pyrus x bretschneideri]	5.73987	59.0662	10.2905	3.36324	6.05466e-06	0.00040483
MD11G1079900	GO:0004843(thiol-dependent ubiquitin-specific protease activity);GO:0016579(protein deubiquitination)	03040(Spliceosome)	K12867	NA	PREDICTED: josephin-like protein [Malus domestica]	3.80335	10.297	2.70735	1.43688	0.0449175	0.287711
MD11G1080300	GO:0003824(catalytic activity);GO:0009228(thiamine biosynthetic process);GO:0009229(thiamine diphosphate biosynthetic process);GO:0009507(chloroplast);GO:0009536(plastid);GO:0009570(chloroplast stroma);GO:0010266(response to vitamin B1);GO:0016045(detection of bacterium);GO:0016829(lyase activity);GO:0046872(metal ion binding);GO:0051536(iron-sulfur cluster binding);GO:0051539(4 iron, 4 sulfur cl…	00730(Thiamine metabolism)	K03147	EC:4.1.99.17	PREDICTED: phosphomethylpyrimidine synthase, chloroplastic [Malus domestica]	0.87298	3.10914	3.56152	1.83249	0.0109988	0.119143
MD11G1080700	GO:0008422(beta-glucosidase activity);GO:0009251(glucan catabolic process)	00500(Starch and sucrose metabolism);00460(Cyanoamino acid metabolism);00940(Phenylpropanoid biosynthesis)	K05349	EC:3.2.1.21	PREDICTED: beta-glucosidase BoGH3B-like [Malus domestica]	18.277	62.9887	3.44634	1.78506	0.0111467	0.120232
MD11G1080800	GO:0009908(flower development);GO:0048262(determination of dorsal/ventral asymmetry)	00040(Pentose and glucuronate interconversions);00500(Starch and sucrose metabolism)	K01184	EC:3.2.1.15	PREDICTED: transcription factor DIVARICATA-like [Malus domestica]	2.04395	6.8429	3.34789	1.74325	0.014138	0.141273
MD11G1081100	GO:0005215(transporter activity);GO:0005886(plasma membrane);GO:0006807(nitrogen compound metabolic process);GO:0006857(oligopeptide transport);GO:0009506(plasmodesma);GO:0015031(protein transport);GO:0016020(membrane);GO:0016021(integral component of membrane);GO:0042936(dipeptide transporter activity);GO:0042937(tripeptide transporter activity);GO:0042938(dipeptide transport);GO:0042939(tripept…	NA	NA	NA	PREDICTED: protein NRT1/ PTR FAMILY 8.2-like [Pyrus x bretschneideri]	1.71518	5.88285	3.42986	1.77815	0.0125544	0.130137
MD11G1081200	GO:0005215(transporter activity);GO:0005886(plasma membrane);GO:0006807(nitrogen compound metabolic process);GO:0006857(oligopeptide transport);GO:0009506(plasmodesma);GO:0015031(protein transport);GO:0016020(membrane);GO:0016021(integral component of membrane);GO:0042936(dipeptide transporter activity);GO:0042937(tripeptide transporter activity);GO:0042938(dipeptide transport);GO:0042939(tripept…	NA	NA	NA	PREDICTED: protein NRT1/ PTR FAMILY 8.2-like isoform X1 [Pyrus x bretschneideri]	2.21482	12.0907	5.45899	2.44863	0.000619693	0.0149478
MD11G1082600	GO:0003674(molecular_function);GO:0005634(nucleus);GO:0009793(embryo development ending in seed dormancy)	NA	NA	NA	PREDICTED: uncharacterized protein LOC103447667 [Malus domestica]	9.54292	38.3882	4.02268	2.00816	0.00459361	0.0638553
MD11G1083400	GO:0003674(molecular_function);GO:0005575(cellular_component);GO:0008150(biological_process)	NA	NA	NA	PREDICTED: uncharacterized protein LOC103436666 [Malus domestica]	1.17393	4.63476	3.94806	1.98114	0.0061356	0.0794467
MD11G1083500	GO:0003674(molecular_function);GO:0005634(nucleus);GO:0008150(biological_process)	NA	NA	NA	PREDICTED: uncharacterized protein LOC103929821 [Pyrus x bretschneideri]	1.33712	7.81301	5.84319	2.54676	0.000448218	0.0117404
MD11G1083900	GO:0005634(nucleus)	00350(Tyrosine metabolism);00950(Isoquinoline alkaloid biosynthesis)	K01592	EC:4.1.1.25	PREDICTED: uncharacterized protein LOC103447457 [Malus domestica]	0.556828	3.87812	6.96466	2.80005	0.000154368	0.00525329
MD11G1085000	GO:0004672(protein kinase activity);GO:0005524(ATP binding);GO:0005886(plasma membrane);GO:0006468(protein phosphorylation);GO:0009506(plasmodesma)	04075(Plant hormone signal transduction)	K14500	EC:2.7.11.1	PREDICTED: probable serine/threonine-protein kinase At5g41260 [Malus domestica]	0.638556	7.32426	11.47	3.5198	2.66862e-06	0.000211153
MD11G1090500	GO:0009813(flavonoid biosynthetic process);GO:0043231(intracellular membrane-bounded organelle);GO:0052696(flavonoid glucuronidation);GO:0080043(quercetin 3-O-glucosyltransferase activity);GO:0080044(quercetin 7-O-glucosyltransferase activity)	00565(Ether lipid metabolism);00600(Sphingolipid metabolism)	K04628	EC:2.4.1.45	PREDICTED: UDP-glycosyltransferase 76E2-like [Malus domestica]	4.22676	44.7361	10.584	3.40382	3.56344e-06	0.000267165
MD11G1090600	GO:0005375(copper ion transmembrane transporter activity);GO:0006825(copper ion transport);GO:0016020(membrane);GO:0016021(integral component of membrane);GO:0035434(copper ion transmembrane transport);GO:0048235(pollen sperm cell differentiation);GO:0048364(root development)	NA	NA	NA	PREDICTED: copper transporter 1-like [Malus domestica]	3.35299	23.2659	6.93885	2.7947	0.000134126	0.0047331
MD11G1091200	GO:0003674(molecular_function);GO:0005634(nucleus);GO:0006979(response to oxidative stress)	03050(Proteasome)	K06700	NA	PREDICTED: uncharacterized protein LOC103447486 isoform X2 [Malus domestica]	1.14405	3.22036	2.81487	1.49307	0.0396809	0.268457
MD11G1092200	GO:0003924(GTPase activity);GO:0005525(GTP binding);GO:0005768(endosome);GO:0005794(Golgi apparatus);GO:0005886(plasma membrane);GO:0006886(intracellular protein transport);GO:0006913(nucleocytoplasmic transport);GO:0007264(small GTPase mediated signal transduction);GO:0009504(cell plate);GO:0010008(endosome membrane);GO:0042546(cell wall biogenesis)	04144(Endocytosis)	K07904	NA	PREDICTED: uncharacterized protein LOC108865821 [Pyrus x bretschneideri]	31.0101	137.31	4.42792	2.14663	0.00238322	0.0399426
MD11G1092300	GO:0005385(zinc ion transmembrane transporter activity);GO:0005773(vacuole);GO:0010043(response to zinc ion);GO:0016020(membrane);GO:0061088(regulation of sequestering of zinc ion)	04144(Endocytosis)	K07904	NA	PREDICTED: metal tolerance protein B isoform X1 [Malus domestica]	21.0516	92.5907	4.39828	2.13694	0.00245786	0.0408007
MD11G1092600	GO:0051213(dioxygenase activity)	00230(Purine metabolism)	K01951	EC:6.3.5.2	PREDICTED: probable inactive 2-oxoglutarate-dependent dioxygenase AOP2 [Malus domestica]	8.46963	37.1825	4.3901	2.13425	0.0025465	0.0417425
MD11G1093700	GO:0016491(oxidoreductase activity);GO:0055114(oxidation-reduction process)	00960(Tropane, piperidine and pyridine alkaloid biosynthesis)	K08081	EC:1.1.1.206	PREDICTED: tropinone reductase homolog At2g29330-like isoform X1 [Malus domestica]	2.40375	75.4175	31.375	4.97154	2.48612e-10	9.31967e-08
MD11G1096200	GO:0000209(protein polyubiquitination);GO:0042787(protein ubiquitination involved in ubiquitin-dependent protein catabolic process);GO:0043161(proteasome-mediated ubiquitin-dependent protein catabolic process);GO:0061630(ubiquitin protein ligase activity)	03013(RNA transport)	K14317	NA	PREDICTED: E3 ubiquitin-protein ligase RDUF1-like [Malus domestica]	1.89695	6.51983	3.43701	1.78115	0.0129138	0.132898
MD11G1098200	GO:0003700(transcription factor activity, sequence-specific DNA binding);GO:0005634(nucleus);GO:0006355(regulation of transcription, DNA-templated);GO:0043565(sequence-specific DNA binding)	04075(Plant hormone signal transduction)	K14494	NA	PREDICTED: scarecrow-like protein 14 [Malus domestica]	1.40231	3.89835	2.77995	1.47506	0.0386026	0.264103
MD11G1099800	GO:0003674(molecular_function);GO:0008150(biological_process);GO:0009507(chloroplast);GO:0016021(integral component of membrane)	NA	NA	NA	PREDICTED: PGR5-like protein 1B, chloroplastic [Malus domestica]	2.1947	6.8415	3.11728	1.64029	0.0218346	0.186931
MD11G1102500	NA	NA	NA	NA	-	1.99217	9.82105	4.92981	2.30153	0.00151602	0.0289856
MD11G1107700	GO:0003676(nucleic acid binding);GO:0005634(nucleus);GO:0005737(cytoplasm);GO:0008270(zinc ion binding);GO:0051928(positive regulation of calcium ion transport)	NA	NA	NA	PREDICTED: CAX-interacting protein 4-like [Pyrus x bretschneideri]	6.71595	20.4083	3.03878	1.60349	0.024292	0.200826
MD11G1108300	GO:0042803(protein homodimerization activity);GO:0045037(protein import into chloroplast stroma)	NA	NA	NA	PREDICTED: outer envelope pore protein 16, chloroplastic-like isoform X3 [Pyrus x bretschneideri]	4.07187	21.2605	5.22132	2.38441	0.000896641	0.019589
MD11G1109700	GO:0003674(molecular_function);GO:0005634(nucleus);GO:0048235(pollen sperm cell differentiation)	NA	NA	NA	PREDICTED: protein TRM32 isoform X1 [Malus domestica]	3.03051	8.11165	2.67666	1.42044	0.045132	0.288519
MD11G1110600	GO:0005737(cytoplasm);GO:0008270(zinc ion binding);GO:0016021(integral component of membrane);GO:0016567(protein ubiquitination);GO:0016874(ligase activity)	NA	NA	NA	PREDICTED: putative E3 ubiquitin-protein ligase XBAT31 [Malus domestica]	23.0894	104.95	4.54539	2.1844	0.00198363	0.0348976
MD11G1125700	GO:0000151(ubiquitin ligase complex);GO:0000209(protein polyubiquitination);GO:0005737(cytoplasm);GO:0031624(ubiquitin conjugating enzyme binding);GO:0032436(positive regulation of proteasomal ubiquitin-dependent protein catabolic process);GO:0042787(protein ubiquitination involved in ubiquitin-dependent protein catabolic process);GO:0061630(ubiquitin protein ligase activity)	03030(DNA replication)	K10743	EC:3.1.26.4	PREDICTED: uncharacterized protein LOC103934299 [Pyrus x bretschneideri]	9.65146	26.6474	2.76097	1.46518	0.0377555	0.261275
MD11G1131400	NA	NA	NA	NA	PREDICTED: uncharacterized protein LOC103422849 [Malus domestica]	6.85124	27.9438	4.07865	2.02809	0.00424703	0.0602077
MD11G1136200	GO:0005773(vacuole);GO:0005887(integral component of plasma membrane);GO:0009506(plasmodesma);GO:0009992(cellular water homeostasis);GO:0015250(water channel activity);GO:0015254(glycerol channel activity);GO:0034220(ion transmembrane transport)	00531(Glycosaminoglycan degradation)	K10532	EC:2.3.1.78	PREDICTED: probable aquaporin PIP2-2 [Malus domestica]	15.5648	77.0987	4.95339	2.30842	0.00113154	0.0233739
MD11G1143800	GO:0000166(nucleotide binding);GO:0003676(nucleic acid binding);GO:0003723(RNA binding);GO:0005515(protein binding);GO:0005654(nucleoplasm);GO:0051028(mRNA transport)	03040(Spliceosome);03013(RNA transport);03015(mRNA surveillance pathway)	K12881	NA	PREDICTED: LOW QUALITY PROTEIN: THO complex subunit 4A-like [Malus domestica]	38.3699	236.429	6.16184	2.62336	0.000234241	0.00716832
MD11G1146900	GO:0005886(plasma membrane);GO:0016021(integral component of membrane)	NA	NA	NA	PREDICTED: protein NUCLEAR FUSION DEFECTIVE 4 [Malus domestica]	0.910452	3.43527	3.77315	1.91577	0.00833415	0.0990011
MD11G1150400	GO:0008422(beta-glucosidase activity);GO:1901657(glycosyl compound metabolic process)	00500(Starch and sucrose metabolism);00460(Cyanoamino acid metabolism);00940(Phenylpropanoid biosynthesis)	K01188	EC:3.2.1.21	PREDICTED: beta-glucosidase 11-like [Malus domestica]	2.7513	15.0507	5.4704	2.45165	0.000740763	0.0170307
MD11G1150500	GO:0008422(beta-glucosidase activity);GO:1901657(glycosyl compound metabolic process)	00500(Starch and sucrose metabolism);00460(Cyanoamino acid metabolism);00940(Phenylpropanoid biosynthesis)	K01188	EC:3.2.1.21	PREDICTED: LOW QUALITY PROTEIN: beta-glucosidase 11-like [Malus domestica]	2.43527	10.6446	4.37102	2.12797	0.00361297	0.0537177
MD11G1156400	GO:0000166(nucleotide binding);GO:0000398(mRNA splicing, via spliceosome);GO:0003677(DNA binding);GO:0003723(RNA binding);GO:0005634(nucleus);GO:0005681(spliceosomal complex);GO:0016607(nuclear speck);GO:0046872(metal ion binding);GO:0048573(photoperiodism, flowering);GO:0089701(U2AF)	03040(Spliceosome)	K12836	NA	PREDICTED: splicing factor U2af small subunit B [Malus domestica]	11.7998	69.0578	5.85245	2.54904	0.000346321	0.00967078
MD11G1158200	GO:0009507(chloroplast)	NA	NA	NA	PREDICTED: uncharacterized protein LOC103447985 isoform X1 [Malus domestica]	0.95044	2.61764	2.75413	1.4616	0.0483464	0.299813
MD11G1159200	GO:0005886(plasma membrane);GO:0016021(integral component of membrane);GO:0042626(ATPase activity, coupled to transmembrane movement of substances)	02010(ABC transporters)	K05681	NA	PREDICTED: pleiotropic drug resistance protein 2-like [Malus domestica]	0.938551	4.80942	5.1243	2.35736	0.000956403	0.020516
MD11G1162300	NA	NA	NA	NA	PREDICTED: pentatricopeptide repeat-containing protein At5g39710-like [Pyrus x bretschneideri]	0.74872	2.08499	2.78473	1.47754	0.0467043	0.294708
MD11G1164000	GO:0003713(transcription coactivator activity);GO:0005634(nucleus);GO:0006366(transcription from RNA polymerase II promoter)	NA	NA	NA	PREDICTED: protein ecdysoneless homolog [Malus domestica]	4.2264	11.104	2.62729	1.39357	0.0488135	0.300887
MD11G1171700	GO:0001682(tRNA 5'-leader removal);GO:0004526(ribonuclease P activity);GO:0005634(nucleus);GO:0005739(mitochondrion);GO:0006397(mRNA processing);GO:0043144(snoRNA processing)	03013(RNA transport)	K18213	EC:3.1.26.5	PREDICTED: proteinaceous RNase P 2-like [Pyrus x bretschneideri]	4.51024	13.1278	2.91067	1.54135	0.0292142	0.224523
MD11G1172000	GO:0003674(molecular_function);GO:0005576(extracellular region);GO:0005886(plasma membrane);GO:0008150(biological_process);GO:0016021(integral component of membrane)	NA	NA	NA	PREDICTED: uncharacterized protein LOC103454334 [Malus domestica]	3.49173	11.1653	3.19765	1.67701	0.0209505	0.180851
MD11G1172100	GO:0003674(molecular_function);GO:0005576(extracellular region);GO:0005886(plasma membrane);GO:0008150(biological_process);GO:0016021(integral component of membrane)	NA	NA	NA	PREDICTED: uncharacterized protein LOC103454334 [Malus domestica]	4.24954	13.1301	3.08978	1.6275	0.0236884	0.197406
MD11G1174300	GO:0003674(molecular_function);GO:0005576(extracellular region);GO:0005886(plasma membrane);GO:0008150(biological_process)	NA	NA	NA	PREDICTED: uncharacterized protein LOC103448116 [Malus domestica]	4.73476	32.0988	6.7794	2.76116	0.000126335	0.00451392
MD11G1176900	GO:0005634(nucleus);GO:0008152(metabolic process);GO:0052689(carboxylic ester hydrolase activity)	04075(Plant hormone signal transduction)	K14493	EC:3.-.-.-	CXE carboxylesterase [Malus pumila]	3.22095	13.0534	4.05266	2.01887	0.00443065	0.0621949
MD11G1191900	GO:0003674(molecular_function);GO:0009507(chloroplast);GO:0009535(chloroplast thylakoid membrane);GO:0009543(chloroplast thylakoid lumen);GO:0009611(response to wounding);GO:0010193(response to ozone);GO:0010224(response to UV-B);GO:0030095(chloroplast photosystem II)	NA	NA	NA	PREDICTED: photosystem II 5 kDa protein, chloroplastic [Malus domestica]	12.2746	207.549	16.9089	4.07971	6.59332e-08	1.08467e-05
MD11G1199600	GO:0005887(integral component of plasma membrane);GO:0043231(intracellular membrane-bounded organelle);GO:0043682(copper-transporting ATPase activity)	00190(Oxidative phosphorylation)	K01535	EC:3.6.3.6	PREDICTED: probable copper-transporting ATPase HMA5 [Pyrus x bretschneideri]	0.603748	3.84442	6.36759	2.67075	0.000233882	0.00716832
MD11G1207100	GO:0005886(plasma membrane);GO:0006071(glycerol metabolic process);GO:0006629(lipid metabolic process);GO:0008889(glycerophosphodiester phosphodiesterase activity);GO:0009506(plasmodesma);GO:0010026(trichome differentiation);GO:0010442(guard cell morphogenesis);GO:0031225(anchored component of membrane);GO:0046658(anchored component of plasma membrane);GO:0052541(plant-type cell wall cellulose me…	00564(Glycerophospholipid metabolism)	K01126	EC:3.1.4.46	PREDICTED: glycerophosphodiester phosphodiesterase GDPDL3-like [Malus domestica]	2.85063	33.8916	11.8892	3.57158	1.31741e-06	0.000123325
MD11G1214900	GO:0000209(protein polyubiquitination);GO:0042787(protein ubiquitination involved in ubiquitin-dependent protein catabolic process);GO:0043161(proteasome-mediated ubiquitin-dependent protein catabolic process);GO:0061630(ubiquitin protein ligase activity)	NA	NA	NA	PREDICTED: uncharacterized protein LOC108174640 [Malus domestica]	2.07098	20.7948	10.041	3.32784	6.25056e-06	0.000413918
MD11G1215000	NA	NA	NA	NA	PREDICTED: uncharacterized protein LOC108174640 [Malus domestica]	4.7968	48.6405	10.1402	3.34201	5.61507e-06	0.000382142
MD11G1219500	GO:0005634(nucleus);GO:0008143(poly(A) binding)	03013(RNA transport)	K03231	NA	PREDICTED: polyadenylate-binding protein RBP45C-like [Pyrus x bretschneideri]	61.7435	341.259	5.52704	2.46651	0.000514704	0.0128913
MD11G1219600	GO:0005634(nucleus);GO:0008143(poly(A) binding)	03013(RNA transport)	K03231	NA	PREDICTED: polyadenylate-binding protein RBP45C-like [Malus domestica]	82.1058	457.769	5.57536	2.47906	0.000483322	0.0122801
MD11G1221500	NA	NA	NA	NA	-	2.06039	23.9229	11.6109	3.5374	2.1608e-06	0.000174597
MD11G1228000	GO:0003777(microtubule motor activity);GO:0005871(kinesin complex);GO:0007018(microtubule-based movement);GO:0016887(ATPase activity)	03008(Ribosome biogenesis in eukaryotes)	K14565	NA	PREDICTED: kinesin-3 [Malus domestica]	0.87786	6.9543	7.92188	2.98584	4.17705e-05	0.00195331
MD11G1229600	GO:0003700(transcription factor activity, sequence-specific DNA binding);GO:0005634(nucleus);GO:0006355(regulation of transcription, DNA-templated);GO:0043565(sequence-specific DNA binding)	04075(Plant hormone signal transduction)	K14494	NA	PREDICTED: scarecrow-like protein 21 [Malus domestica]	3.13802	15.1542	4.82923	2.27179	0.00138553	0.0272189
MD11G1231200	GO:0004674(protein serine/threonine kinase activity);GO:0005886(plasma membrane);GO:0006468(protein phosphorylation);GO:0006952(defense response);GO:0009506(plasmodesma)	00520(Amino sugar and nucleotide sugar metabolism)	K01183	EC:3.2.1.14	PREDICTED: G-type lectin S-receptor-like serine/threonine-protein kinase At4g27290 [Malus domestica]	0.410128	1.21252	2.95645	1.56387	0.0324128	0.238891
MD11G1232400	GO:0004674(protein serine/threonine kinase activity);GO:0005886(plasma membrane);GO:0006468(protein phosphorylation);GO:0006952(defense response);GO:0009506(plasmodesma)	00520(Amino sugar and nucleotide sugar metabolism)	K01183	EC:3.2.1.14	PREDICTED: G-type lectin S-receptor-like serine/threonine-protein kinase At4g27290 isoform X2 [Malus domestica]	2.36937	10.708	4.51936	2.17612	0.00215035	0.0371671
MD11G1232500	GO:0004674(protein serine/threonine kinase activity);GO:0005886(plasma membrane);GO:0006468(protein phosphorylation);GO:0006952(defense response);GO:0009506(plasmodesma)	00520(Amino sugar and nucleotide sugar metabolism)	K01183	EC:3.2.1.14	PREDICTED: G-type lectin S-receptor-like serine/threonine-protein kinase At4g27290 [Malus domestica]	3.18879	13.6108	4.26834	2.09368	0.00307111	0.0480021
MD11G1233100	GO:0005509(calcium ion binding)	04070(Phosphatidylinositol signaling system);04626(Plant-pathogen interaction)	K02183	NA	PREDICTED: calcium-binding protein PBP1-like [Malus domestica]	3.0401	8.68631	2.85725	1.51463	0.0360296	0.254444
MD11G1235200	GO:0003674(molecular_function);GO:0005634(nucleus);GO:0009611(response to wounding)	NA	NA	NA	2-nonaprenyl-3-methyl-6-methoxy-1,4-benzoquinol hydroxylase [Theobroma cacao]	2.52984	9.61135	3.7992	1.9257	0.00789619	0.0953338
[truncated: 631 more rows]

## Sheet: 2020-Down DEGs
Gene id	GO	KEGG	KO_ENTRY	EC	Description	FPKM.Control-1	FPKM.Waxed-1	FC	Log2FC	Pval	qval
[truncated: 2,019 more rows]

## Sheet: 2021-Up DEGs
Gene id	KEGG(KO,pathway,description)	GO(GO_term,class,description)	Description	RPKM.Control-2	RPKM.Control-3	RPKM.Waxed-2	RPKM.Waxed-3	Log2FC	logCPM	F	PValue	FDR	Refseq	pfam	interpro
[truncated: 3,403 more rows]

[truncated: 1 more sheets: 2021-Down DEGs]
