# Supplementary material for: The molecular mechanism on suppression of climacteric fruit ripening with postharvest wax coating treatment via transcriptome
Source: Front Plant Sci. 2022 Aug 15;13:978013. doi: 10.3389/fpls.2022.978013 (PMC9421051; doi:10.3389/fpls.2022.978013)
Supplement: Supplementary file 3 [file Table_3.XLSX]

## Sheet: Co-up DEGs in 2020-21
Gene id	Description	KEGG(2020)	KO_ENTRY(2020)	EC(2020)	KEGG(KO,pathway,description)(2021)	FPKM.Control-1	RPKM.Control-2	RPKM.Control-3	FPKM.Waxed-1	RPKM.Waxed-2	RPKM.Waxed-3
MD00G1009000	PREDICTED: acetolactate synthase small subunit 1, chloroplastic-like [Pyrus x bretschneideri]	01210(2-Oxocarboxylic acid metabolism);01230(Biosynthesis of amino acids);00650(Butanoate metabolism);00660(C5-Branched dibasic acid metabolism);00290(Valine, leucine and isoleucine biosynthesis);00770(Pantothenate and CoA biosynthesis)	K01653	EC:2.2.1.6	-	69.806	20.8951	23.5811	218.148	138.25	85.4978
MD00G1012200	PREDICTED: triosephosphate isomerase, cytosolic [Pyrus x bretschneideri]	01200(Carbon metabolism);01230(Biosynthesis of amino acids);00010(Glycolysis / Gluconeogenesis);00051(Fructose and mannose metabolism);00562(Inositol phosphate metabolism);00710(Carbon fixation in photosynthetic organisms)	K01803	EC:5.3.1.1	K01803,ko00710,Carbon fixation in photosynthetic organisms;K01803,ko00010,Glycolysis / Gluconeogenesis;K01803,ko00562,Inositol phosphate metabolism;K01803,ko01230,Biosynthesis of amino acids;K01803,ko00051,Fructose and mannose metabolism;K01803,ko01200,Carbon metabolism	1.95569	3.60695	3.82719	10.5555	11.6706	12.6613
MD00G1018700	beta-galactosidase [Malus domestica]	NA	NA	NA	-	21.638	4.28066	5.00944	136.23	76.5798	99.9256
MD00G1027200	PREDICTED: uncharacterized protein LOC108170057 [Malus domestica]	NA	NA	NA	-	1.08751	2.32436	1.90598	3.82444	6.42848	5.21709
MD00G1032200	PREDICTED: (+)-neomenthol dehydrogenase-like isoform X2 [Malus domestica]	00902(Monoterpenoid biosynthesis)	K15095	EC:1.1.1.208	K15095,ko00902,Monoterpenoid biosynthesis	2.1716	5.52074	2.55734	9.60327	12.1355	9.72419
MD00G1034500	PREDICTED: uncharacterized protein LOC103454832 [Malus domestica]	NA	NA	NA	-	10.5619	5.11062	4.08824	27.7101	17.4057	11.0522
MD00G1039200	-	NA	NA	NA	-	4.48658	0.782574	0.998302	21.566	2.27977	1.96132
MD00G1040000	PREDICTED: fructose-bisphosphate aldolase 1, chloroplastic [Malus domestica]	01200(Carbon metabolism);01230(Biosynthesis of amino acids);00010(Glycolysis / Gluconeogenesis);00030(Pentose phosphate pathway);00051(Fructose and mannose metabolism);00710(Carbon fixation in photosynthetic organisms)	K01623	EC:4.1.2.13	K01623,ko01230,Biosynthesis of amino acids;K01623,ko00680,Methane metabolism;K01623,ko00710,Carbon fixation in photosynthetic organisms;K01623,ko00010,Glycolysis / Gluconeogenesis;K01623,ko00051,Fructose and mannose metabolism;K01623,ko01200,Carbon metabolism;K01623,ko00030,Pentose phosphate pathway	25.6182	9.40959	4.06789	256.891	68.7619	39.4361
MD00G1044500	PREDICTED: cyclin-dependent kinase inhibitor 6-like [Malus domestica]	NA	NA	NA	-	1.60762	24.246	19.7519	6.83244	107.405	82.4249
MD00G1051100	-	NA	NA	NA	-	104.853	77.5013	90.9302	350.984	208.663	216.017
MD00G1053600	PREDICTED: uncharacterized protein LOC108867596 [Pyrus x bretschneideri]	NA	NA	NA	-	1.47408	0.926345	0.650099	14.2925	11.1009	12.9845
MD00G1059700	3-hydroxy-3-methylglutaryl coenzyme A reductase, partial [Malus domestica]	00900(Terpenoid backbone biosynthesis)	K00021	EC:1.1.1.34	-	16.0376	41.8346	52.6558	116.048	682.593	521.399
MD00G1063500	PREDICTED: probable receptor-like protein kinase At1g11050 [Malus domestica]	04075(Plant hormone signal transduction);04626(Plant-pathogen interaction)	K13416	EC:2.7.10.1;EC:2.7.11.1	-	1.37147	1.4363	1.41765	5.92483	4.48542	6.62569
MD00G1065300	PREDICTED: uncharacterized protein LOC103438635 [Malus domestica]	NA	NA	NA	-	17.9223	23.7576	19.0629	51.846	81.7982	50.8405
MD00G1069900	-	NA	NA	NA	-	6.30044	3.84797	3.02638	110.57	42.6048	43.4973
MD00G1076700	PREDICTED: glutamyl-tRNA(Gln) amidotransferase subunit A-like [Malus domestica]	00970(Aminoacyl-tRNA biosynthesis)	K02433	EC:6.3.5.6;EC:6.3.5.7	-	1.51856	1.03078	0.732745	4.50216	4.80896	5.66089
MD00G1078600	PREDICTED: ankyrin-1-like [Pyrus x bretschneideri]	NA	NA	NA	-	27.2149	28.5121	27.5007	86.8038	75.2738	52.5118
MD00G1082100	PREDICTED: receptor-like protein 2 [Malus domestica]	NA	NA	NA	-	0.432947	0.415531	0.440276	3.40109	3.37587	2.23431
MD00G1087700	PREDICTED: ankyrin repeat-containing protein At5g02620-like [Malus domestica]	NA	NA	NA	-	6.28211	7.54436	6.97698	19.7144	19.1046	15.4482
MD00G1095700	PREDICTED: monothiol glutaredoxin-S17 [Malus domestica]	01200(Carbon metabolism);01230(Biosynthesis of amino acids);00010(Glycolysis / Gluconeogenesis);00030(Pentose phosphate pathway);00051(Fructose and mannose metabolism);00710(Carbon fixation in photosynthetic organisms)	K01623	EC:4.1.2.13	-	29.8065	19.3195	21.2927	181.416	92.9833	93.7482
MD00G1107700	hypothetical protein PRUPE_ppa007723mg [Prunus persica]	00860(Porphyrin and chlorophyll metabolism)	K04035	EC:1.14.13.81	-	45.8333	7.70605	3.15819	125.216	19.995	11.4646
MD00G1107800	PREDICTED: magnesium-protoporphyrin IX monomethyl ester [oxidative] cyclase, chloroplastic-like isoform X1 [Pyrus x bretschneideri]	00860(Porphyrin and chlorophyll metabolism)	K04035	EC:1.14.13.81	-	30.1578	68.495	31.3744	93.7419	144.478	97.8283
MD00G1108700	PREDICTED: TIP41-like protein [Pyrus x bretschneideri]	NA	NA	NA	-	2.11057	3.97954	2.7607	12.9739	19.9039	13.0355
MD00G1137800	PREDICTED: ubiquitin-conjugating enzyme E2 7 [Malus domestica]	04141(Protein processing in endoplasmic reticulum);04120(Ubiquitin mediated proteolysis)	K10575	EC:2.3.2.23	K10575,ko04141,Protein processing in endoplasmic reticulum;K10575,ko05012,Parkinson's disease;K10575,ko04120,Ubiquitin mediated proteolysis	69.4427	134.993	129.606	260.03	473.198	440.984
MD00G1143300	PREDICTED: transcription initiation factor TFIID subunit 5 [Malus domestica]	03022(Basal transcription factors)	K03130	NA	K03130,ko05168,Herpes simplex infection;K03130,ko03022,Basal transcription factors	7.68146	10.1005	9.99708	25.645	42.4041	27.4022
MD00G1147000	PREDICTED: uncharacterized protein At1g76660-like [Pyrus x bretschneideri]	04144(Endocytosis)	K19476	NA	-	1.68288	0.716454	0.880232	5.24159	1.70659	2.49193
MD00G1147200	PREDICTED: amidase 1-like [Pyrus x bretschneideri]	00970(Aminoacyl-tRNA biosynthesis)	K02433	EC:6.3.5.6;EC:6.3.5.7	K01426,ko00360,Phenylalanine metabolism;K01426,ko00330,Arginine and proline metabolism;K01426,ko00380,Tryptophan metabolism;K01426,ko00643,Styrene degradation;K01426,ko00627,Aminobenzoate degradation	3.44012	1.32512	1.10349	10.6606	4.01799	4.6347
MD00G1148200	PREDICTED: ubiquinol oxidase 2, mitochondrial-like [Pyrus x bretschneideri]	00970(Aminoacyl-tRNA biosynthesis)	K01868	EC:6.1.1.3	-	2.40353	0.195579	0.035497	126.623	31.4078	19.3888
MD00G1156300	PREDICTED: BAG family molecular chaperone regulator 8, chloroplastic-like [Pyrus x bretschneideri]	NA	NA	NA	-	1.75142	6.48399	5.77715	4.82632	17.4915	17.0016
MD00G1160300	PREDICTED: ABC transporter A family member 10-like [Malus domestica]	02010(ABC transporters)	K05643	NA	-	1.87869	1.06607	1.25539	7.36112	5.09094	7.62141
MD00G1160700	PREDICTED: LOW QUALITY PROTEIN: guanine nucleotide-binding protein subunit beta-like protein [Malus domestica]	00640(Propanoate metabolism);00410(beta-Alanine metabolism);04146(Peroxisome)	K01578	EC:4.1.1.9	K14753,ko05162,Measles	88.7874	28.6801	31.4857	232.411	108.221	96.6534
MD00G1171100	PREDICTED: 40S ribosomal protein S10-1-like [Malus domestica]	03010(Ribosome)	K02947	NA	-	51.5166	15.9371	17.6943	151.862	44.9615	38.7311
MD00G1171700	PREDICTED: uncharacterized protein LOC103437744 [Malus domestica]	NA	NA	NA	-	1.84462	0.383461	1.74987	5.51158	4.096	2.97232
MD00G1175400	PREDICTED: uncharacterized protein LOC103961335 isoform X1 [Pyrus x bretschneideri]	NA	NA	NA	-	2.63164	3.25069	3.89394	7.16656	9.67326	9.40689
MD00G1193100	PREDICTED: protein NETWORKED 4A-like isoform X1 [Malus domestica]	04626(Plant-pathogen interaction)	K13420	EC:2.7.11.1	-	2.33166	5.16781	4.26926	8.55402	13.7281	8.59465
MD01G1020300	PREDICTED: UBP1-associated protein 2A-like [Malus domestica]	03040(Spliceosome)	K12741	NA	K12741,ko03040,Spliceosome	42.3209	104.625	93.5318	248.921	503.301	344.177
MD01G1028100	PREDICTED: uncharacterized protein LOC103408150 [Malus domestica]	NA	NA	NA	-	3.82883	11.3972	14.6151	34.7122	33.1775	36.5137
MD01G1028300	PREDICTED: uncharacterized protein LOC103931922 isoform X1 [Pyrus x bretschneideri]	NA	NA	NA	-	0.505513	1.05022	1.27922	3.90043	4.15989	5.44514
MD01G1029700	PREDICTED: asparagine synthetase [glutamine-hydrolyzing] 2 [Malus domestica]	00250(Alanine, aspartate and glutamate metabolism)	K01953	EC:6.3.5.4	-	17.5043	6.32539	7.19113	122.81	54.279	42.8768
MD01G1035100	PREDICTED: LOW QUALITY PROTEIN: lanC-like protein GCL1 [Malus domestica]	NA	NA	NA	-	13.5703	12.0851	13.9164	66.3791	101.421	72.6579
MD01G1036200	PREDICTED: homeobox-leucine zipper protein ATHB-6-like isoform X1 [Malus domestica]	00750(Vitamin B6 metabolism)	K05275	EC:1.1.1.65	-	92.9318	200.802	214.916	334.773	619.263	412.754
MD01G1049600	PREDICTED: BON1-associated protein 2-like [Malus domestica]	NA	NA	NA	-	7.20965	3.25009	2.75944	69.2588	132.927	40.5995
MD01G1049700	PREDICTED: E3 ubiquitin-protein ligase At4g11680 [Prunus mume]	00380(Tryptophan metabolism)	K11816	EC:1.14.13.168	-	1.11337	1.38476	1.43864	3.45927	5.42767	3.67041
MD01G1053100	PREDICTED: (+)-neomenthol dehydrogenase-like [Malus domestica]	00902(Monoterpenoid biosynthesis)	K15095	EC:1.1.1.208	-	3.79186	2.98913	3.11847	12.0044	10.5689	12.7147
MD01G1069300	PREDICTED: probable serine/threonine-protein kinase At1g01540 [Pyrus x bretschneideri]	04626(Plant-pathogen interaction)	K13430	EC:2.7.11.1	-	0.703656	0.490976	0.556942	3.84867	3.61548	4.96722
MD01G1070300	PREDICTED: FK506-binding protein 4-like [Malus domestica]	NA	NA	NA	-	38.492	218.623	235.19	125.735	619.973	512.106
MD01G1074300	PREDICTED: BTB/POZ domain-containing protein POB1-like [Malus domestica]	NA	NA	NA	-	22.1878	8.0731	7.31529	58.529	29.4857	17.9656
MD01G1076900	PREDICTED: uncharacterized protein At5g05190 [Malus domestica]	NA	NA	NA	-	0.520662	0.497304	0.481382	2.36233	1.10175	1.24423
MD01G1080500	PREDICTED: protein TSS [Malus domestica]	01200(Carbon metabolism);01210(2-Oxocarboxylic acid metabolism);01230(Biosynthesis of amino acids);00020(Citrate cycle (TCA cycle));00630(Glyoxylate and dicarboxylate metabolism)	K01647	EC:2.3.3.1	-	1.46739	0.561175	0.303885	15.0823	7.7194	2.97416
MD01G1083500	PREDICTED: uncharacterized protein At4g00950-like [Malus domestica]	NA	NA	NA	-	4.46158	2.98	1.66724	37.6048	17.4481	11.0267
MD01G1083900	PREDICTED: kinesin light chain-like [Pyrus x bretschneideri]	NA	NA	NA	-	0.560251	0.590902	0.717899	1.75019	1.66675	2.39918
MD01G1086200	PREDICTED: uncharacterized protein LOC103417540 [Malus domestica]	NA	NA	NA	-	4.62613	3.99747	1.55349	26.9312	20.4237	10.2921
MD01G1087900	PREDICTED: protein IQ-DOMAIN 1-like isoform X2 [Malus domestica]	03015(mRNA surveillance pathway)	K14411	NA	-	11.8634	19.135	18.0971	31.4181	55.8919	46.0585
MD01G1095200	PREDICTED: uncharacterized calcium-binding protein At1g02270-like [Pyrus x bretschneideri]	NA	NA	NA	-	1.06099	0.329964	0.0958201	3.70065	1.99369	1.83511
MD01G1103500	PREDICTED: U-box domain-containing protein 14 [Malus domestica]	04140(Regulation of autophagy)	K08332	NA	-	15.7048	16.4757	12.5922	49.2525	59.8441	42.1217
MD01G1108000	PREDICTED: GATA transcription factor 8-like [Malus domestica]	NA	NA	NA	-	2.06637	0.853165	0.961119	33.5534	5.12161	5.57365
MD01G1109300	PREDICTED: aminodeoxychorismate synthase, chloroplastic [Malus domestica]	00790(Folate biosynthesis)	K13950	EC:2.6.1.85	K13950,ko00790,Folate biosynthesis	4.65965	3.62025	3.74182	19.6221	10.6564	11.0794
MD01G1111100	PREDICTED: alpha-taxilin-like isoform X2 [Malus domestica]	03013(RNA transport)	K03231	NA	-	5.67409	9.55039	10.2254	20.4575	30.8846	21.7341
MD01G1112200	PREDICTED: uncharacterized protein LOC103432529 [Malus domestica]	00270(Cysteine and methionine metabolism)	K17398	EC:2.1.1.37	-	4.4416	10.3176	9.97484	15.0941	46.5809	33.1546
MD01G1112500	PREDICTED: uncharacterized protein LOC103432563 [Malus domestica]	NA	NA	NA	-	6.14883	4.19932	4.13884	39.7218	23.8272	11.5488
MD01G1117800	PREDICTED: uncharacterized protein LOC103433655 isoform X1 [Malus domestica]	00941(Flavonoid biosynthesis)	K01859	EC:5.5.1.6	K01859,ko00941,Flavonoid biosynthesis	1.49369	0.192607	0.209746	4.66067	1.62442	1.23376
MD01G1118100	PREDICTED: chalcone--flavonone isomerase-like isoform X3 [Malus domestica]	00941(Flavonoid biosynthesis)	K01859	EC:5.5.1.6	K01859,ko00941,Flavonoid biosynthesis	8.36839	1.81504	0.546704	26.731	10.1501	6.09402
MD01G1119800	PREDICTED: splicing factor 3B subunit 3-like [Pyrus x bretschneideri]	03040(Spliceosome)	K12830	NA	K12830,ko03040,Spliceosome	5.4365	7.23483	7.97024	14.4744	21.018	17.4164
MD01G1120600	PREDICTED: metal tolerance protein 11 isoform X1 [Malus domestica]	02010(ABC transporters)	K05658	EC:3.6.3.44	-	1.6765	1.15051	0.947692	7.87095	2.99116	2.16088
MD01G1125800	PREDICTED: ubiquitin-conjugating enzyme E2 7-like, partial [Malus domestica]	04141(Protein processing in endoplasmic reticulum);04120(Ubiquitin mediated proteolysis)	K10575	EC:2.3.2.23	K10575,ko04141,Protein processing in endoplasmic reticulum;K10575,ko05012,Parkinson's disease;K10575,ko04120,Ubiquitin mediated proteolysis	3.2718	3.31664	3.03847	26.3227	9.60232	8.51228
MD01G1132500	PREDICTED: arginyl-tRNA--protein transferase 2-like isoform X2 [Malus domestica]	NA	NA	NA	-	4.3605	4.09949	3.83	13.2016	13.5269	11.1217
MD01G1132800	PREDICTED: chlorophyll a-b binding protein CP29.3, chloroplastic-like [Malus domestica]	00196(Photosynthesis - antenna proteins)	K08915	NA	K08915,ko00196,Photosynthesis - antenna proteins	1.73473	1.33349	0.25816	15.37	6.41215	2.19071
MD01G1137900	PREDICTED: LOW QUALITY PROTEIN: ribulose bisphosphate carboxylase/oxygenase activase, chloroplastic [Pyrus x bretschneideri]	NA	NA	NA	-	4.98924	8.70134	3.43706	33.3332	32.1564	10.7476
MD01G1138500	PREDICTED: AT-hook motif nuclear-localized protein 15 [Malus domestica]	NA	NA	NA	-	3.261	3.90754	3.47955	9.04411	10.3754	9.52429
MD01G1139800	PREDICTED: wall-associated receptor kinase-like 20 [Pyrus x bretschneideri]	04075(Plant hormone signal transduction)	K13415	EC:2.7.10.1;EC:2.7.11.1	-	1.95085	1.40196	1.47119	9.15945	12.0709	6.15465
MD01G1139900	PREDICTED: mannose-1-phosphate guanylyltransferase 1-like [Pyrus x bretschneideri]	00051(Fructose and mannose metabolism);00520(Amino sugar and nucleotide sugar metabolism)	K00966	EC:2.7.7.13	-	31.0083	17.6725	15.5979	81.7718	78.0354	51.8183
MD01G1141000	PREDICTED: BTB/POZ domain-containing protein At1g01640-like [Malus domestica]	NA	NA	NA	-	1.04028	0.847197	0.751734	5.59111	3.75029	1.74508
MD01G1141200	hypothetical protein Ccrd_012034 [Cynara cardunculus var. scolymus]	NA	NA	NA	-	3.27563	0.84447	0.649139	16.9294	5.32751	2.78514
MD01G1144400	PREDICTED: 16.9 kDa class I heat shock protein 2-like [Pyrus x bretschneideri]	04141(Protein processing in endoplasmic reticulum)	K13993	NA	-	5.65343	21.2355	17.4812	48.6029	57.9439	70.497
MD01G1146300	PREDICTED: sedoheptulose-1,7-bisphosphatase, chloroplastic-like [Malus domestica]	01200(Carbon metabolism);00710(Carbon fixation in photosynthetic organisms)	K01100	EC:3.1.3.37	K01100,ko01200,Carbon metabolism;K01100,ko00710,Carbon fixation in photosynthetic organisms	9.53097	7.4302	3.79876	34.7341	19.391	15.3944
MD01G1148500	PREDICTED: glycosyltransferase family 64 protein C4-like [Malus domestica]	NA	NA	NA	-	4.23035	0.693176	0.629047	15.7434	3.01032	2.71113
MD01G1149900	PREDICTED: pleckstrin homology domain-containing protein 1 [Malus domestica]	NA	NA	NA	-	38.3607	23.0761	19.0895	140.148	92.8839	58.084
MD01G1153600	PREDICTED: flavonol synthase/flavanone 3-hydroxylase-like [Malus domestica]	00941(Flavonoid biosynthesis)	K05278	EC:1.14.11.23	-	4.53747	1.45552	1.39856	41.8971	17.3787	12.485
MD01G1155000	PREDICTED: transcription factor bHLH51-like [Malus domestica]	NA	NA	NA	-	2.83433	0.511787	0.222931	8.49597	4.87036	2.86947
MD01G1160300	PREDICTED: protein EARLY RESPONSIVE TO DEHYDRATION 15-like [Malus domestica]	NA	NA	NA	-	4.43313	1.69266	1.28737	56.9933	40.4831	26.4593
MD01G1160900	PREDICTED: wound-induced protein 1-like, partial [Malus domestica]	NA	NA	NA	-	6.0093	0.390512	0.708768	23.9317	2.32266	1.98645
MD01G1164700	PREDICTED: superoxide dismutase [Mn], mitochondrial-like [Malus domestica]	04146(Peroxisome)	K04564	EC:1.15.1.1	-	28.694	15.684	16.8017	389.13	187.367	167.456
MD01G1168200	PREDICTED: putative F-box protein At3g16210 [Malus domestica]	04145(Phagosome)	K07374	NA	-	404.099	322.092	295.375	1424.56	955.586	761.6
MD01G1179700	M18-S3Bp [Malus floribunda]	04120(Ubiquitin mediated proteolysis)	K04506	EC:2.3.2.27	-	1.99777	1.67705	0.777859	46.2176	17.2753	13.5229
MD01G1179800	M18S-3Ap [Malus floribunda]	04626(Plant-pathogen interaction)	K13466	NA	-	4.26034	1.20663	1.34822	238.137	39.8991	38.2849
MD01G1184600	PREDICTED: protein EXORDIUM-like 3 [Malus domestica]	NA	NA	NA	-	1.15645	0.168195	0.335796	4.25446	1.33384	1.67312
MD01G1185500	PREDICTED: enolase [Malus domestica]	01200(Carbon metabolism);01230(Biosynthesis of amino acids);00010(Glycolysis / Gluconeogenesis);03018(RNA degradation)	K01689	EC:4.2.1.11	K01689,ko00680,Methane metabolism;K01689,ko00010,Glycolysis / Gluconeogenesis;K01689,ko03018,RNA degradation;K01689,ko04066,HIF-1 signaling pathway;K01689,ko01200,Carbon metabolism;K01689,ko01230,Biosynthesis of amino acids	10.4497	1.24238	1.5299	187.41	14.5738	17.649
MD01G1186200	PREDICTED: uncharacterized protein LOC103406497 [Malus domestica]	00562(Inositol phosphate metabolism);04070(Phosphatidylinositol signaling system)	K18081	EC:3.1.3.64;EC:3.1.3.95	-	1.50793	1.40041	2.47903	7.1409	7.25891	9.21186
MD01G1195700	PREDICTED: calcium-dependent protein kinase 26-like [Malus domestica]	04626(Plant-pathogen interaction)	K13412	EC:2.7.11.1	-	3.64242	6.83499	5.26823	14.0344	24.7721	14.6698
MD01G1195800	PREDICTED: uncharacterized protein LOC103440166 [Malus domestica]	03040(Spliceosome)	K12893	NA	-	2.09001	5.06412	1.73219	8.08989	8.45862	7.08952
MD01G1196900	PREDICTED: BAG family molecular chaperone regulator 1 [Malus domestica]	NA	NA	NA	-	10.013	5.30423	3.23559	44.7342	30.8637	28.9647
MD01G1198300	PREDICTED: E3 ubiquitin-protein ligase XBAT33-like isoform X1 [Malus domestica]	NA	NA	NA	-	8.8318	2.65994	2.15468	23.272	11.081	6.48198
MD01G1199000	PREDICTED: 3-hexulose-6-phosphate isomerase-like [Malus domestica]	NA	NA	NA	-	6.18491	3.17119	3.0217	32.793	10.6283	10.8437
MD01G1201400	PREDICTED: O-glucosyltransferase rumi homolog [Malus domestica]	00514(Other types of O-glycan biosynthesis)	K13667	EC:2.4.1.-	-	0.796004	0.285121	0.248393	4.23526	1.43203	1.10871
MD01G1205900	PREDICTED: protein SRC2 homolog [Malus domestica]	04144(Endocytosis)	K05747	NA	-	8.46408	4.44224	7.08526	27.963	13.7762	20.2381
MD01G1206300	PREDICTED: protein DETOXIFICATION 35-like isoform X3 [Pyrus x bretschneideri]	NA	NA	NA	-	13.1464	1.71663	2.62604	92.3066	12.1549	10.6726
MD01G1207700	PREDICTED: probable receptor-like protein kinase At5g24010 [Malus domestica]	04626(Plant-pathogen interaction)	K13430	EC:2.7.11.1	-	0.506429	0.329465	0.743192	2.2428	1.41303	2.36225
MD01G1211300	PREDICTED: nuclear valosin-containing protein-like [Pyrus x bretschneideri]	03013(RNA transport)	K03231	NA	-	1.51411	1.19247	1.15672	10.4506	5.10864	5.00219
MD01G1219500	PREDICTED: glutamate synthase [NADH], amyloplastic isoform X1 [Malus domestica]	01230(Biosynthesis of amino acids);00910(Nitrogen metabolism);00250(Alanine, aspartate and glutamate metabolism)	K00264	EC:1.4.1.13;EC:1.4.1.14	K00264,ko00910,Nitrogen metabolism;K00264,ko00250,Alanine, aspartate and glutamate metabolism;K00264,ko01230,Biosynthesis of amino acids	65.8329	40.8641	43.8554	237.339	113.611	94.2215
MD01G1224800	PREDICTED: protein yippee-like At4g27740 [Malus domestica]	NA	NA	NA	-	147.81	44.8736	15.6187	538.054	1211.58	796.5
MD01G1228200	PREDICTED: two-component response regulator-like APRR5 isoform X1 [Pyrus x bretschneideri]	04712(Circadian rhythm - plant)	K12130	NA	-	13.2096	9.99222	9.41137	58.0847	64.7632	46.2424
MD01G1238400	PREDICTED: uncharacterized protein LOC103406617 [Malus domestica]	NA	NA	NA	-	10.5862	3.61918	3.80717	45.3524	18.3253	16.1974
MD02G1003500	PREDICTED: BTB/POZ and TAZ domain-containing protein 3-like [Malus domestica]	00903(Limonene and pinene degradation);00945(Stilbenoid, diarylheptanoid and gingerol biosynthesis)	K00517	NA	-	2.63038	1.05236	0.525253	10.0231	2.84395	2.94423
MD02G1009900	PREDICTED: FIP1[V]-like protein isoform X2 [Malus domestica]	03015(mRNA surveillance pathway)	K14405	NA	-	11.0392	68.1548	61.8473	32.5397	170.592	126.497
MD02G1013200	PREDICTED: E3 ubiquitin-protein ligase EL5 isoform X1 [Malus domestica]	03013(RNA transport)	K14317	NA	-	7.37285	35.2478	35.658	56.8015	203.397	143.708
MD02G1013600	PREDICTED: LOW QUALITY PROTEIN: 116 kDa U5 small nuclear ribonucleoprotein component-like [Malus domestica]	03040(Spliceosome)	K12852	NA	K12852,ko03040,Spliceosome	7.5235	7.02359	7.69619	25.5961	23.8942	22.3846
MD02G1016700	PREDICTED: uncharacterized protein LOC103447424 [Malus domestica]	NA	NA	NA	-	4.47341	0.804933	0.667854	21.4233	3.89733	5.0564
MD02G1019900	PREDICTED: protein SRC2-like [Malus domestica]	NA	NA	NA	-	1.95799	0.846908	1.14186	52.7075	26.134	31.2914
MD02G1020000	PREDICTED: protein SRG1-like [Malus domestica]	00941(Flavonoid biosynthesis)	K05278	EC:1.14.11.23	-	15.6713	7.76579	6.90435	64.171	38.9175	40.1008
MD02G1020100	PREDICTED: protein SRG1-like [Malus domestica]	00941(Flavonoid biosynthesis)	K05278	EC:1.14.11.23	-	7.97016	6.81785	9.25023	54.7412	46.0764	44.9104
MD02G1022900	PREDICTED: putative clathrin assembly protein At5g35200 [Malus domestica]	01210(2-Oxocarboxylic acid metabolism);01230(Biosynthesis of amino acids);00290(Valine, leucine and isoleucine biosynthesis);00770(Pantothenate and CoA biosynthesis)	K01687	EC:4.2.1.9	-	11.6631	5.56388	6.19361	49.9594	23.4824	20.2099
MD02G1026500	PREDICTED: zinc finger BED domain-containing protein DAYSLEEPER-like [Malus domestica]	NA	NA	NA	-	5.75494	22.708	19.7682	17.4445	69.5827	58.1771
MD02G1030000	PREDICTED: uncharacterized protein LOC103448064 [Malus domestica]	NA	NA	NA	-	16.1661	40.2325	32.8989	84.7015	121.308	75.4146
MD02G1042800	PREDICTED: probable plastidic glucose transporter 2 [Malus domestica]	NA	NA	NA	-	22.327	8.07797	8.14974	73.9476	43.6429	19.4572
MD02G1044300	PREDICTED: TMV resistance protein N-like isoform X2 [Malus domestica]	04141(Protein processing in endoplasmic reticulum)	K08852	EC:2.7.11.1;EC:3.1.26.-	-	0.854561	0.363341	0.238047	3.51801	2.22213	1.12196
MD02G1047200	PREDICTED: coiled-coil domain-containing protein 9 [Malus domestica]	NA	NA	NA	-	63.565	89.7137	79.0023	254.387	533.981	433.831
MD02G1062600	PREDICTED: uncharacterized protein LOC103426633 [Malus domestica]	NA	NA	NA	-	22.4452	68.3389	61.662	66.7988	244.552	178.012
MD02G1075800	PREDICTED: serine acetyltransferase 5-like [Malus domestica]	01200(Carbon metabolism);01230(Biosynthesis of amino acids);00920(Sulfur metabolism);00270(Cysteine and methionine metabolism)	K00640	EC:2.3.1.30	K00640,ko00270,Cysteine and methionine metabolism;K00640,ko01200,Carbon metabolism;K00640,ko01230,Biosynthesis of amino acids;K00640,ko00920,Sulfur metabolism	10.6964	6.81115	5.12529	31.8775	18.3803	11.7119
MD02G1080500	PREDICTED: GTP-binding protein SAR1A-like [Gossypium hirsutum]	04141(Protein processing in endoplasmic reticulum)	K07953	EC:3.6.5.-	-	3.53042	5.55072	5.11092	9.88397	11.6055	11.5696
MD02G1082500	PREDICTED: uncharacterized protein LOC103940922 [Pyrus x bretschneideri]	NA	NA	NA	-	2.93189	36.6466	35.1164	28.3634	254.321	258.24
MD02G1084000	PREDICTED: UDP-glycosyltransferase 91C1-like [Malus domestica]	00942(Anthocyanin biosynthesis)	K12937	EC:2.4.1.254	-	11.7557	9.89402	5.32928	104.61	122.214	67.5987
MD02G1084400	PREDICTED: serine/threonine-protein kinase tricorner-like isoform X1 [Pyrus x bretschneideri]	04626(Plant-pathogen interaction)	K13412	EC:2.7.11.1	-	0.582404	0.237362	0.258484	2.42151	0.885156	1.1135
MD02G1086200	PREDICTED: nuclear transcription factor Y subunit A-3-like [Malus domestica]	00970(Aminoacyl-tRNA biosynthesis)	K01883	EC:6.1.1.16	-	3.53267	2.85224	3.98019	10.3018	8.01054	7.52174
MD02G1090000	PREDICTED: MOB kinase activator-like 1A isoform X2 [Pyrus x bretschneideri]	NA	NA	NA	K06685,ko04391,Hippo signaling pathway - fly;K06685,ko04390,Hippo signaling pathway;K06685,ko04392,Hippo signaling pathway -multiple species;K06685,ko04111,Cell cycle - yeast	0.835981	0.180925	0.426886	39.7121	11.9054	10.4304
MD02G1091000	PREDICTED: uncharacterized protein LOC103427977 [Malus domestica]	01200(Carbon metabolism);01230(Biosynthesis of amino acids);00010(Glycolysis / Gluconeogenesis);00260(Glycine, serine and threonine metabolism)	K01834	EC:5.4.2.11	-	1.37288	0.754197	1.06466	10.4213	22.6266	19.3622
MD02G1105900	PREDICTED: protein TIFY 3-like [Malus domestica]	04075(Plant hormone signal transduction)	K13464	NA	K13464,ko04075,Plant hormone signal transduction	2.16079	0.938344	1.97556	23.7127	4.02188	4.41251
MD02G1107500	PREDICTED: subtilisin-like protease SBT5.4 [Malus domestica]	04144(Endocytosis)	K18443	NA	-	1.43031	0.419027	0.420097	4.7397	1.05492	1.15484
MD02G1109700	PREDICTED: TMV resistance protein N-like [Pyrus x bretschneideri]	00500(Starch and sucrose metabolism)	K00695	EC:2.4.1.13	-	0.833126	0.233403	0.117877	3.03486	0.559503	0.42214
MD02G1110700	PREDICTED: B-box zinc finger protein 19-like [Malus domestica]	NA	NA	NA	-	2.04636	8.42308	5.86303	19.8342	21.086	18.1258
MD02G1114100	PREDICTED: glutamate receptor 3.6-like [Pyrus x bretschneideri]	NA	NA	NA	-	1.03074	0.606968	0.324369	3.68233	1.2352	1.15115
MD02G1115200	HD domain class transcription factor [Malus domestica]	03030(DNA replication);03420(Nucleotide excision repair);03430(Mismatch repair);03440(Homologous recombination)	K07466	NA	-	2.59637	0.78361	0.49778	10.4519	4.81791	2.8456
MD02G1123500	PREDICTED: uncharacterized protein LOC103407042 [Malus domestica]	NA	NA	NA	-	16.9506	4.81731	6.55746	57.7299	15.8041	20.2844
MD02G1128300	PREDICTED: LOW QUALITY PROTEIN: histidine kinase 1-like [Malus domestica]	04075(Plant hormone signal transduction)	K14489	EC:2.7.13.3	-	0.416833	0.610973	0.749827	1.34708	1.03277	2.2824
MD02G1129500	PREDICTED: thiosulfate sulfurtransferase 18-like isoform X2 [Malus domestica]	NA	NA	NA	-	10.1041	11.2467	15.5685	164.839	1087.13	755.204
MD02G1130500	PREDICTED: EH domain-containing protein 2-like isoform X2 [Pyrus x bretschneideri]	00190(Oxidative phosphorylation)	K02265	NA	-	2.3746	3.49156	4.22472	8.99679	14.2108	12.0598
MD02G1133200	PREDICTED: uncharacterized protein LOC103400680 [Malus domestica]	NA	NA	NA	-	2.19056	4.71586	1.78964	16.5058	28.8986	11.2916
MD02G1134400	PREDICTED: histone H1-like [Malus domestica]	NA	NA	NA	-	17.1967	105.889	114.818	117.329	476.717	474.527
MD02G1141400	PREDICTED: AAA-ATPase At2g18193-like [Malus domestica]	03008(Ribosome biogenesis in eukaryotes)	K14571	NA	-	0.698178	0.935504	0.93678	5.0473	3.80079	6.41787
MD02G1146300	PREDICTED: zinc-finger homeodomain protein 6-like [Malus domestica]	NA	NA	NA	-	3.90544	8.29382	5.5752	18.1677	26.1002	13.7227
MD02G1148800	PREDICTED: scarecrow-like protein 4 [Malus domestica]	04075(Plant hormone signal transduction)	K14494	NA	-	5.48899	1.29342	1.21519	22.104	5.61993	3.49522
MD02G1157100	PREDICTED: uncharacterized protein LOC103426817 [Malus domestica]	NA	NA	NA	-	1.52764	1.33902	1.27995	5.09377	3.42164	3.20889
MD02G1179500	-	NA	NA	NA	-	1.7684	2.88537	2.62298	8.24902	17.0169	12.5019
MD02G1180800	PREDICTED: uncharacterized protein LOC103957396 [Pyrus x bretschneideri]	04140(Regulation of autophagy)	K08332	NA	-	0.343574	0.065373	0.04746	2.55031	0.26662	0.419737
MD02G1182500	PREDICTED: BTB/POZ domain-containing protein At5g67385-like [Malus domestica]	00902(Monoterpenoid biosynthesis)	K15095	EC:1.1.1.208	-	1.64209	2.62331	1.28637	9.57882	7.30823	3.06943
MD02G1182900	PREDICTED: ubiquitin-conjugating enzyme E2 7 [Malus domestica]	04141(Protein processing in endoplasmic reticulum);04120(Ubiquitin mediated proteolysis)	K10575	EC:2.3.2.23	-	68.6497	10.4915	9.96471	275.025	36.8193	31.245
MD02G1183500	PREDICTED: BTB/POZ domain-containing protein NPY2-like [Malus domestica]	00902(Monoterpenoid biosynthesis)	K15095	EC:1.1.1.208	-	0.38521	0.34662	0.264886	1.23181	0.854265	0.569167
MD02G1184400	PREDICTED: BTB/POZ and TAZ domain-containing protein 4 [Malus domestica]	00903(Limonene and pinene degradation);00945(Stilbenoid, diarylheptanoid and gingerol biosynthesis)	K00517	NA	-	7.63088	9.04662	10.2704	27.1909	31.0815	22.7586
MD02G1196100	PREDICTED: transcription factor TCP9-like [Malus domestica]	04712(Circadian rhythm - plant)	K16221	NA	-	1.39289	1.11011	0.711115	4.50874	2.0221	1.65347
MD02G1200700	PREDICTED: cytochrome P450 704C1 [Malus domestica]	00073(Cutin, suberine and wax biosynthesis)	K15402	EC:1.14.-.-	-	1.04352	0.922613	0.334903	6.85933	5.67618	5.14506
MD02G1243100	PREDICTED: malate dehydrogenase [NADP], chloroplastic-like [Malus domestica]	01200(Carbon metabolism);00620(Pyruvate metabolism);00710(Carbon fixation in photosynthetic organisms)	K00051	EC:1.1.1.82	K00051,ko00710,Carbon fixation in photosynthetic organisms;K00051,ko00620,Pyruvate metabolism;K00051,ko01200,Carbon metabolism	38.2638	85.243	56.9482	118.444	287.141	173.85
MD02G1252800	PREDICTED: putative disease resistance RPP13-like protein 1 [Malus domestica]	NA	NA	NA	-	3.48656	1.43215	1.35045	10.5876	4.35149	2.69444
MD02G1254300	PREDICTED: rust resistance kinase Lr10-like [Malus domestica]	00520(Amino sugar and nucleotide sugar metabolism)	K01183	EC:3.2.1.14	-	1.49412	2.83154	1.93475	9.96548	12.4289	12.1252
MD02G1257600	PREDICTED: cytochrome P450 76M5-like isoform X1 [Malus domestica]	00941(Flavonoid biosynthesis);00944(Flavone and flavonol biosynthesis)	K05280	EC:1.14.13.21	-	7.3867	8.15524	10.1727	36.64	28.5012	19.9123
MD02G1258000	PREDICTED: uncharacterized protein At2g39795, mitochondrial-like [Malus domestica]	NA	NA	NA	-	11.0298	5.45193	5.13219	29.0479	20.8051	17.7867
MD02G1264400	PREDICTED: putative laccase-9 [Pyrus x bretschneideri]	00053(Ascorbate and aldarate metabolism)	K00423	EC:1.10.3.3	-	7.54446	0.417329	0.329709	31.6819	3.65256	2.98588
MD02G1264900	PREDICTED: TMV resistance protein N-like [Pyrus x bretschneideri]	NA	NA	NA	-	1.24085	0.84897	0.693385	3.9096	2.42454	1.91934
MD02G1275100	PREDICTED: cytochrome P450 71A14-like [Pyrus x bretschneideri]	NA	NA	NA	-	4.65488	0.928729	1.14804	16.9283	3.81052	3.89289
MD02G1300300	PREDICTED: protein PNS1-like [Malus domestica]	NA	NA	NA	-	21.5142	15.3509	13.3719	63.2766	63.4921	49.0252
MD02G1300400	PREDICTED: N-alpha-acetyltransferase daf-31-like [Malus domestica]	NA	NA	NA	-	32.6364	175.586	167.197	123.272	522.053	432.127
MD02G1301500	PREDICTED: methyltransferase-like protein 13 isoform X2 [Malus domestica]	NA	NA	NA	-	1.17271	1.11341	0.955291	4.55696	5.69534	4.59959
MD02G1303400	PREDICTED: cinnamoyl-CoA reductase 1-like [Malus domestica]	00940(Phenylpropanoid biosynthesis)	K09753	EC:1.2.1.44	-	6.06128	1.45906	0.973837	18.5342	5.49214	3.80939
MD02G1318000	PREDICTED: box C/D snoRNA protein 1-like isoform X2 [Pyrus x bretschneideri]	NA	NA	NA	-	4.96782	2.34191	2.76283	14.1104	6.50023	4.20919
MD03G1001700	PREDICTED: pyruvate kinase, cytosolic isozyme [Malus domestica]	01200(Carbon metabolism);01230(Biosynthesis of amino acids);00010(Glycolysis / Gluconeogenesis);00620(Pyruvate metabolism);00230(Purine metabolism)	K00873	EC:2.7.1.40	K00873,ko04922,Glucagon signaling pathway;K00873,ko01200,Carbon metabolism;K00873,ko04930,Type II diabetes mellitus;K00873,ko01230,Biosynthesis of amino acids;K00873,ko05230,Central carbon metabolism in cancer;K00873,ko00620,Pyruvate metabolism;K00873,ko05203,Viral carcinogenesis;K00873,ko00230,Purine metabolism;K00873,ko00010,Glycolysis / Gluconeogenesis	22.8364	13.3658	14.5084	121.273	63.2485	31.0237
MD03G1002400	PREDICTED: YTH domain-containing family protein 2-like isoform X1 [Malus domestica]	04141(Protein processing in endoplasmic reticulum)	K09503	NA	-	2.94814	3.17729	3.93145	10.1145	10.9213	10.9268
MD03G1002500	PREDICTED: uncharacterized protein LOC103964826 isoform X1 [Pyrus x bretschneideri]	04141(Protein processing in endoplasmic reticulum)	K09503	NA	-	94.8545	93.8246	79.0333	318.447	369.964	357.302
MD03G1002600	PREDICTED: subtilisin-like protease SBT3.18 [Malus domestica]	04144(Endocytosis)	K18443	NA	-	3.14611	1.27219	1.25288	10.6264	7.09356	5.30215
MD03G1003500	PREDICTED: uncharacterized protein LOC103414791 [Malus domestica]	00970(Aminoacyl-tRNA biosynthesis)	K04567	EC:6.1.1.6	-	0.574165	0.291011	0.549304	3.02369	2.08802	2.32902
MD03G1024100	PREDICTED: zinc finger A20 and AN1 domain-containing stress-associated protein 8-like [Pyrus x bretschneideri]	NA	NA	NA	-	184.936	43.1462	39.1842	535.236	148.369	96.3991
MD03G1028900	PREDICTED: cellulose synthase-like protein E1 isoform X1 [Pyrus x bretschneideri]	00500(Starch and sucrose metabolism);00520(Amino sugar and nucleotide sugar metabolism)	K00770	EC:2.4.2.24	-	1.67042	1.26551	1.37812	11.6195	20.3567	9.87063
MD03G1029000	PREDICTED: cellulose synthase-like protein E1 isoform X1 [Pyrus x bretschneideri]	00500(Starch and sucrose metabolism);00520(Amino sugar and nucleotide sugar metabolism)	K00770	EC:2.4.2.24	-	1.29614	0.666968	0.197271	11.3419	13.3491	3.84229
MD03G1029100	PREDICTED: cellulose synthase-like protein E6 [Pyrus x bretschneideri]	00500(Starch and sucrose metabolism);00520(Amino sugar and nucleotide sugar metabolism)	K00770	EC:2.4.2.24	-	26.4211	20.7865	23.9536	74.6898	64.035	49.7566
MD03G1041200	PREDICTED: KH domain-containing protein At5g56140 [Malus domestica]	NA	NA	NA	-	20.2326	39.7757	30.047	59.6513	123.686	90.2989
MD03G1041400	PREDICTED: KH domain-containing protein At5g56140 [Malus domestica]	NA	NA	NA	-	27.8964	6.26099	5.53914	83.9828	25.9601	18.705
MD03G1053100	PREDICTED: 40S ribosomal protein S26-3-like [Pyrus x bretschneideri]	03010(Ribosome)	K02976	NA	K02976,ko03010,Ribosome	56.9756	19.6413	18.8969	149	56.2265	54.2575
MD03G1062600	PREDICTED: pentatricopeptide repeat-containing protein At2g30100, chloroplastic [Malus domestica]	NA	NA	NA	-	8.25617	16.0185	13.4845	22.6501	45.6627	29.2196
MD03G1068500	PREDICTED: protein SMAX1-LIKE 6-like [Malus domestica]	NA	NA	NA	-	3.07393	0.856739	1.35339	8.12616	8.01045	5.6242
MD03G1072300	PREDICTED: E3 ubiquitin-protein ligase CHFR-like isoform X1 [Pyrus x bretschneideri]	01230(Biosynthesis of amino acids);00400(Phenylalanine, tyrosine and tryptophan biosynthesis)	K01657	EC:4.1.3.27	-	16.5448	6.8863	5.50412	61.9065	36.6195	30.1639
MD03G1072400	PREDICTED: probable NAD(P)H dehydrogenase (quinone) FQR1-like 3 [Pyrus x bretschneideri]	00130(Ubiquinone and other terpenoid-quinone biosynthesis)	K03809	EC:1.6.5.2	-	9.64731	3.93128	2.96324	44.6546	15.5273	14.0651
MD03G1076700	PREDICTED: protein NRT1/ PTR FAMILY 8.2-like isoform X1 [Pyrus x bretschneideri]	NA	NA	NA	-	16.8621	26.785	26.3193	78.3539	90.5158	59.7125
MD03G1089700	PREDICTED: scarecrow-like protein 33 [Malus domestica]	04075(Plant hormone signal transduction)	K14494	NA	-	1.93841	1.2624	1.23498	8.80195	5.47726	7.98315
MD03G1097000	PREDICTED: histone H4 [Malus domestica]	NA	NA	NA	K11254,ko05203,Viral carcinogenesis;K11254,ko05034,Alcoholism;K11254,ko05322,Systemic lupus erythematosus	34.4263	40.295	51.4865	109.411	101.684	92.0846
MD03G1114300	PREDICTED: beta-galactosidase 8-like [Malus domestica]	00052(Galactose metabolism);00600(Sphingolipid metabolism);00531(Glycosaminoglycan degradation);00604(Glycosphingolipid biosynthesis - ganglio series);00511(Other glycan degradation)	K12309	EC:3.2.1.23	-	0.330873	0.0777177	0.112844	2.5939	0.836442	0.808236
MD03G1118400	PREDICTED: double-stranded RNA-binding protein 2 [Pyrus x bretschneideri]	NA	NA	NA	-	5.57742	2.01404	2.10187	16.1313	5.39531	4.39681
MD03G1122300	PREDICTED: zinc finger protein ZAT10-like [Malus domestica]	NA	NA	NA	-	3.12256	6.3545	4.05652	9.01069	10.4262	14.5148
MD03G1137700	PREDICTED: uncharacterized protein LOC103419769 [Malus domestica]	NA	NA	NA	-	31.1549	22.9592	20.544	123.276	99.0987	65.3858
MD03G1139600	PREDICTED: 30S ribosomal protein S17-like [Malus domestica]	03010(Ribosome)	K02961	NA	K02961,ko03010,Ribosome	6.68966	3.0164	3.18527	21.2998	14.5752	7.25341
MD03G1142000	PREDICTED: uncharacterized protein LOC103415893 [Malus domestica]	NA	NA	NA	-	4.31022	3.17651	2.64242	12.4614	8.27196	6.98694
MD03G1143200	PREDICTED: protein ecdysoneless homolog [Malus domestica]	NA	NA	NA	-	3.21733	5.03726	5.56777	8.80835	12.726	12.9939
MD03G1143900	PREDICTED: 60S ribosomal protein L10a [Malus domestica]	03010(Ribosome)	K02865	NA	K02865,ko03010,Ribosome	36.7505	24.7154	31.2883	124.194	68.6198	77.4587
MD03G1144400	PREDICTED: glucan endo-1,3-beta-glucosidase 14-like isoform X1 [Malus domestica]	00500(Starch and sucrose metabolism)	K19892	EC:3.2.1.39	-	2.09184	0.262445	0.190532	37.1087	13.5778	7.03523
MD03G1145900	PREDICTED: protein transport protein sec24-like [Pyrus x bretschneideri]	04141(Protein processing in endoplasmic reticulum)	K14007	NA	-	16.5414	3.9172	4.28122	44.5821	15.9504	13.8327
MD03G1170300	PREDICTED: THUMP domain-containing protein 1-like [Malus domestica]	NA	NA	NA	-	8.58328	17.847	16.9322	23.3274	96.9381	90.6172
MD03G1173700	PREDICTED: photosystem II 5 kDa protein, chloroplastic-like [Malus domestica]	NA	NA	NA	-	42.2426	110.216	73.9272	175.763	253.694	248.591
MD03G1193200	PREDICTED: 65-kDa microtubule-associated protein 1 [Malus domestica]	00190(Oxidative phosphorylation)	K02133	EC:3.6.3.14	-	6.80667	14.4614	17.3418	37.7379	81.4973	91.1117
MD03G1193600	PREDICTED: MATH domain and coiled-coil domain-containing protein At3g58370-like [Malus domestica]	NA	NA	NA	-	2.92039	2.28964	2.1817	7.70538	10.4066	7.63517
MD03G1201300	PREDICTED: uncharacterized protein LOC103422923 [Malus domestica]	NA	NA	NA	-	0.938305	1.70617	0.937364	4.57349	5.90325	4.46195
MD03G1202100	PREDICTED: uncharacterized protein LOC103428837 isoform X1 [Malus domestica]	NA	NA	NA	-	5.27562	2.34879	2.37752	14.4369	6.22408	6.29931
MD03G1202200	PREDICTED: polyadenylate-binding protein RBP45C-like [Pyrus x bretschneideri]	03013(RNA transport)	K03231	NA	-	135.23	57.4882	53.3428	545.18	321.719	270.634
MD03G1202600	-	NA	NA	NA	-	25.1394	4.48002	6.83969	198.503	35.0303	35.3898
MD03G1210300	PREDICTED: protein translation factor SUI1 homolog 2 [Malus domestica]	03013(RNA transport)	K03113	NA	K03113,ko03013,RNA transport	139.931	30.1354	30.9285	454.246	100.247	78.6937
MD03G1218100	PREDICTED: double-strand break repair protein MRE11 isoform X1 [Malus domestica]	03440(Homologous recombination);03450(Non-homologous end-joining)	K10865	NA	-	0.405768	0.158978	0.181368	1.59936	1.8611	1.48901
MD03G1218900	PREDICTED: chlorophyll a-b binding protein 13, chloroplastic [Malus domestica]	00196(Photosynthesis - antenna proteins)	K08914	NA	K08914,ko00196,Photosynthesis - antenna proteins	3.81759	2.56016	1.06734	27.5509	9.6489	4.95131
MD03G1220100	PREDICTED: uncharacterized protein YnbB-like isoform X1 [Malus domestica]	NA	NA	NA	-	0.923851	0.372482	0.202813	2.89515	0.621257	0.814034
MD03G1223400	PREDICTED: uncharacterized protein LOC103430353 isoform X2 [Malus domestica]	NA	NA	NA	-	3.20583	3.59125	5.86881	25.0578	11.487	20.0939
MD03G1225500	PREDICTED: choline transporter-like protein 2 [Malus domestica]	NA	NA	NA	K15377,ko05231,Choline metabolism in cancer	1.33173	0.632379	1.03723	3.86496	2.42346	3.43122
MD03G1225800	PREDICTED: vicilin-like seed storage protein At2g18540 isoform X1 [Pyrus x bretschneideri]	NA	NA	NA	-	14.3434	175.626	156.173	46.4894	670.609	455.342
MD03G1227400	PREDICTED: cytochrome c oxidase copper chaperone 2 [Pyrus x bretschneideri]	00190(Oxidative phosphorylation)	K02260	NA	-	8.7576	3.58296	5.36099	37.825	11.7814	12.3283
MD03G1227600	PREDICTED: cytochrome c oxidase copper chaperone 2 [Pyrus x bretschneideri]	00190(Oxidative phosphorylation)	K02260	NA	-	4.12905	3.2344	4.54952	14.5581	13.232	10.8466
MD03G1231600	PREDICTED: protein yippee-like At5g53940 [Malus domestica]	NA	NA	NA	-	3.00719	2.13572	1.89763	9.2613	10.9301	10.8675
MD03G1233100	PREDICTED: L-type lectin-domain containing receptor kinase IX.1-like [Malus domestica]	00500(Starch and sucrose metabolism)	K01176	EC:3.2.1.1	-	0.714253	0.355715	0.268575	3.13157	1.45077	0.604757
MD03G1233600	PREDICTED: L-type lectin-domain containing receptor kinase IX.1-like [Malus domestica]	00500(Starch and sucrose metabolism)	K01176	EC:3.2.1.1	-	0.477025	1.18097	1.15694	2.16249	2.23525	2.74071
MD03G1251500	PREDICTED: protein SRG1-like, partial [Malus domestica]	00941(Flavonoid biosynthesis)	K05278	EC:1.14.11.23	-	2.31225	0.499171	0.598735	11.0565	3.9176	1.82526
MD03G1257200	PREDICTED: uncharacterized protein LOC103427374 [Malus domestica]	NA	NA	NA	-	3.00358	12.6374	12.7977	10.3079	59.6389	37.1236
MD03G1262000	PREDICTED: protein MARD1 isoform X1 [Malus domestica]	NA	NA	NA	-	10.6648	5.77196	5.30146	52.4888	27.791	20.9182
MD03G1272500	PREDICTED: sugar transporter ERD6-like 7 [Prunus mume]	NA	NA	NA	-	21.3647	22.2269	29.0954	90.6295	57.7941	105.469
MD03G1274200	PREDICTED: LOW QUALITY PROTEIN: protein SLOW WALKER 1 [Malus domestica]	03008(Ribosome biogenesis in eukaryotes)	K14549	NA	K14549,ko03008,Ribosome biogenesis in eukaryotes	5.33373	14.5217	15.7879	14.486	64.7506	40.4019
MD03G1280000	PREDICTED: putative disease resistance protein RGA1 [Malus domestica]	00100(Steroid biosynthesis)	K01052	EC:3.1.1.13	-	0.562848	0.225716	0.0910372	2.75958	0.880791	0.748434
MD03G1280200	PREDICTED: disease resistance protein RGA2-like [Malus domestica]	03040(Spliceosome)	K12818	EC:3.6.4.13	-	0.960877	0.582739	0.777376	5.12423	2.04108	1.14618
MD03G1282200	PREDICTED: MLO-like protein 1 [Malus domestica]	NA	NA	NA	-	3.95949	1.21352	0.870635	15.0629	8.22721	3.87319
MD03G1291900	ethylene-responsive transcription factor ERF073-like [Malus domestica]	04626(Plant-pathogen interaction)	K13434	NA	-	5.35776	1.27282	1.88233	80.0285	41.2834	32.5486
MD03G1292400	PREDICTED: probable polygalacturonase isoform X2 [Malus domestica]	00040(Pentose and glucuronate interconversions);00500(Starch and sucrose metabolism)	K01213	EC:3.2.1.67	-	2.23524	0.656066	0.529218	10.6241	4.8009	4.46946
MD03G1298800	PREDICTED: uncharacterized protein LOC103432650 isoform X1 [Malus domestica]	NA	NA	NA	-	40.9629	70.7484	62.074	119.06	165.965	178.004
MD04G1008300	myb family transcription factor APL [Malus domestica]	03013(RNA transport)	K14317	NA	-	7.68395	3.7197	3.76272	38.381	15.2851	10.8885
MD04G1016600	PREDICTED: chaperone protein dnaJ 20, chloroplastic-like [Malus domestica]	04141(Protein processing in endoplasmic reticulum)	K09517	NA	-	36.8437	30.9672	30.0363	100.363	171.956	120.81
MD04G1019100	PREDICTED: receptor-like kinase TMK4 [Malus domestica]	04626(Plant-pathogen interaction)	K13429	NA	-	3.81032	2.9898	3.21865	10.1951	5.95125	7.53841
MD04G1025400	PREDICTED: TATA box-binding protein-associated factor RNA polymerase I subunit B [Malus domestica]	NA	NA	NA	-	1.74061	0.998993	1.22488	4.65079	2.25514	2.43919
MD04G1029400	PREDICTED: chitinase-like protein 1 [Malus domestica]	00520(Amino sugar and nucleotide sugar metabolism)	K01183	EC:3.2.1.14	-	17.6574	0.51796	0.689394	62.1914	2.56452	2.88847
MD04G1030300	PREDICTED: chitinase-like protein 1 [Malus domestica]	00520(Amino sugar and nucleotide sugar metabolism)	K01183	EC:3.2.1.14	-	77.3191	9.88465	12.1361	285.623	59.5049	72.8418
MD04G1031300	hypothetical protein PRUPE_ppb015435mg, partial [Prunus persica]	NA	NA	NA	-	1.21509	4.67073	4.83909	6.86084	42.7544	79.2626
MD04G1031400	PREDICTED: extensin-2-like isoform X1 [Pyrus x bretschneideri]	NA	NA	NA	-	2.80686	39.4621	41.4546	11.8139	330.386	527.987
MD04G1031500	PREDICTED: extensin-2-like isoform X1 [Pyrus x bretschneideri]	NA	NA	NA	-	2.39519	11.9605	12.117	9.40733	95.4577	139.434
MD04G1033200	PREDICTED: ras-related protein RABA5e [Malus domestica]	04144(Endocytosis)	K07904	NA	K07904,ko04961,Endocrine and other factor-regulated calcium reabsorption;K07904,ko04972,Pancreatic secretion;K07904,ko04962,Vasopressin-regulated water reabsorption;K07904,ko04144,Endocytosis	15.2033	7.60439	8.48578	127.287	100.487	65.1799
MD04G1033300	PREDICTED: pirin-like protein [Malus domestica]	NA	NA	NA	-	3.84618	4.64499	0.828263	92.38	52.7771	53.0595
MD04G1035000	PREDICTED: putative disease resistance protein At4g11170 isoform X1 [Malus domestica]	03040(Spliceosome);04141(Protein processing in endoplasmic reticulum);04144(Endocytosis)	K03283	NA	-	1.12255	1.14774	0.644585	4.38319	2.73139	1.86042
MD04G1038300	PREDICTED: uncharacterized protein LOC103435448 [Malus domestica]	03013(RNA transport)	K13130	NA	-	1.61192	1.07961	0.862162	4.65465	4.81082	3.53423
MD04G1038400	PREDICTED: uncharacterized protein LOC103435448 [Malus domestica]	03013(RNA transport)	K13130	NA	-	3.69142	10.9643	12.7681	10.5214	29.5857	24.5962
MD04G1038500	PREDICTED: PTI1-like tyrosine-protein kinase 1 isoform X1 [Malus domestica]	04626(Plant-pathogen interaction)	K13436	EC:2.7.11.1	-	43.3372	42.1605	41.4855	225.394	157.724	113.974
MD04G1040300	PREDICTED: tetrapyrrole-binding protein, chloroplastic [Malus domestica]	NA	NA	NA	-	4.92414	5.11696	2.25061	17.7611	13.5123	7.29568
MD04G1042500	PREDICTED: uncharacterized protein LOC103322359 isoform X1 [Prunus mume]	03010(Ribosome)	K02987	NA	-	6.82533	2.50303	2.36232	30.1626	11.3084	8.10756
MD04G1042700	COL domain class transcription factor [Malus domestica]	NA	NA	NA	-	9.05153	6.15553	3.88047	31.7087	10.6244	10.6096
MD04G1058000	PREDICTED: ethylene-responsive transcription factor 2-like [Malus domestica]	04075(Plant hormone signal transduction)	K14517	NA	-	1.73016	0.284778	1.11126	11.6508	2.87674	1.8027
MD04G1058500	PREDICTED: nudix hydrolase 8 [Pyrus x bretschneideri]	NA	NA	NA	-	2.15265	0.566752	0.400026	15.9724	2.23537	0.854205
MD04G1082300	PREDICTED: legumain [Malus domestica]	NA	NA	NA	-	1.4059	4.5975	2.19588	57.5736	51.8339	27.2022
MD04G1083800	PREDICTED: axial regulator YABBY 1-like isoform X1 [Malus domestica]	NA	NA	NA	-	3.78765	1.01339	0.945911	16.6597	2.66061	1.65829
MD04G1099800	PREDICTED: uncharacterized protein LOC103433283 [Malus domestica]	NA	NA	NA	-	1.75777	0.780826	0.893911	7.76286	6.58913	3.27256
MD04G1103000	PREDICTED: DEAD-box ATP-dependent RNA helicase 57-like [Malus domestica]	03040(Spliceosome)	K12835	EC:3.6.4.13	-	1.60259	2.84148	2.66003	5.86956	13.4864	8.3309
MD04G1104500	PREDICTED: probable DNA helicase MCM8 [Malus domestica]	03030(DNA replication)	K02212	EC:3.6.4.12	-	0.997257	1.22382	0.670472	7.01277	4.65579	3.79154
MD04G1112600	PREDICTED: serine/threonine-protein kinase CDL1-like isoform X2 [Malus domestica]	04626(Plant-pathogen interaction)	K13430	EC:2.7.11.1	-	1.43843	1.59611	0.939883	10.9349	5.79976	5.35658
MD04G1113200	PREDICTED: two-component response regulator-like APRR7 isoform X1 [Pyrus x bretschneideri]	04712(Circadian rhythm - plant)	K12129	NA	-	1.94531	2.51497	1.77547	6.867	6.82502	6.78378
MD04G1113300	PREDICTED: adenylate kinase 1, chloroplastic-like [Malus domestica]	00230(Purine metabolism)	K00939	EC:2.7.4.3	K00939,ko00230,Purine metabolism	12.1533	4.57467	5.83354	37.6819	15.8612	15.4546
MD04G1129500	PREDICTED: transcription factor AS1 [Malus domestica]	NA	NA	NA	-	1.56045	3.11961	3.55707	9.31004	8.84247	9.34288
MD04G1130100	-	NA	NA	NA	-	1.14547	0.0520797	0.113428	5.05706	1.77004	1.29516
MD04G1135900	hypothetical protein PRUPE_ppa024811mg [Prunus persica]	NA	NA	NA	-	6.08403	0.453353	1.48108	28.9045	27.221	15.2716
MD04G1138900	hypothetical protein PRUPE_ppa014227mg [Prunus persica]	NA	NA	NA	-	2.74012	0.455097	0.247796	20.2755	12.8895	14.3014
MD04G1143700	PREDICTED: tubulin beta chain [Malus domestica]	04145(Phagosome)	K07375	NA	K07375,ko04540,Gap junction;K07375,ko05130,Pathogenic Escherichia coli infection;K07375,ko04145,Phagosome	4.64959	4.94676	5.71123	12.4455	12.333	12.2159
MD04G1150400	PREDICTED: probable LRR receptor-like serine/threonine-protein kinase At3g47570 [Malus domestica]	04626(Plant-pathogen interaction)	K13428	EC:2.7.11.1	-	0.815626	0.202612	0.159351	2.51825	0.573847	0.519137
MD04G1153300	PREDICTED: pyridoxal 5'-phosphate synthase subunit PDX1.3 [Malus domestica]	00750(Vitamin B6 metabolism)	K06215	EC:4.3.3.6	K06215,ko00750,Vitamin B6 metabolism	47.4712	28.1087	20.7817	126.553	74.3816	51.0953
MD04G1155700	PREDICTED: acyl-coenzyme A oxidase 4, peroxisomal-like [Malus domestica]	01212(Fatty acid metabolism);00071(Fatty acid degradation);00592(alpha-Linolenic acid metabolism);01040(Biosynthesis of unsaturated fatty acids);04146(Peroxisome)	K00232	EC:1.3.3.6	K00232,ko00071,Fatty acid degradation;K00232,ko00592,alpha-Linolenic acid metabolism;K00232,ko03320,PPAR signaling pathway;K00232,ko01212,Fatty acid metabolism;K00232,ko01040,Biosynthesis of unsaturated fatty acids;K00232,ko04146,Peroxisome;K00232,ko04024,cAMP signaling pathway	2.25032	0.68396	0.165516	14.451	6.52174	4.40693
MD04G1160100	PREDICTED: pyruvate decarboxylase 2-like [Malus domestica]	00010(Glycolysis / Gluconeogenesis)	K01568	EC:4.1.1.1	-	8.98982	1.16843	1.62412	452.857	114.399	65.9493
MD04G1165100	PREDICTED: protein trichome birefringence-like 35 [Malus domestica]	NA	NA	NA	-	2.13917	0.434773	0.83766	6.14657	2.17229	2.57074
MD04G1171600	PREDICTED: CBL-interacting protein kinase 2-like [Pyrus x bretschneideri]	04075(Plant hormone signal transduction)	K14498	EC:2.7.11.1	K07198,ko04068,FoxO signaling pathway;K07198,ko04151,PI3K-Akt signaling pathway;K07198,ko04931,Insulin resistance;K07198,ko04211,Longevity regulating pathway;K07198,ko04150,mTOR signaling pathway;K07198,ko04922,Glucagon signaling pathway;K07198,ko04910,Insulin signaling pathway;K07198,ko04140,Regulation of autophagy;K07198,ko05410,Hypertrophic cardiomyopathy (HCM);K07198,ko04152,AMPK signaling pa…	9.46731	10.2346	10.7855	29.5167	31.1177	34.2659
MD04G1176100	PREDICTED: serine/threonine-protein kinase AtPK2/AtPK19-like [Malus domestica]	04140(Regulation of autophagy)	K08269	EC:2.7.11.1	K04688,ko04910,Insulin signaling pathway;K04688,ko04152,AMPK signaling pathway;K04688,ko05231,Choline metabolism in cancer;K04688,ko04666,Fc gamma R-mediated phagocytosis;K04688,ko01521,EGFR tyrosine kinase inhibitor resistance;K04688,ko04151,PI3K-Akt signaling pathway;K04688,ko04012,ErbB signaling pathway;K04688,ko04211,Longevity regulating pathway;K04688,ko04150,mTOR signaling pathway;K04688,ko…	6.16987	2.87042	2.42156	17.3513	7.99929	5.34776
MD04G1178900	PREDICTED: calcium-binding protein CML42-like [Pyrus x bretschneideri]	04626(Plant-pathogen interaction)	K13448	NA	-	4.42991	0.187818	0.136353	39.8806	9.32681	2.67508
MD04G1180400	PREDICTED: serine/threonine-protein kinase At5g01020-like [Malus domestica]	04626(Plant-pathogen interaction)	K13430	EC:2.7.11.1	-	2.00023	3.28526	2.98133	11.0551	16.0966	14.4769
MD04G1184900	MYB domain class transcription factor [Malus domestica]	00190(Oxidative phosphorylation);00860(Porphyrin and chlorophyll metabolism)	K02259	NA	-	0.830837	0.619209	0.326937	4.75619	6.75993	3.65247
MD04G1191000	PREDICTED: chloroplast stem-loop binding protein of 41 kDa b, chloroplastic [Malus domestica]	NA	NA	NA	-	4.08167	2.49251	1.54565	13.0451	6.03974	4.32021
MD04G1194600	PREDICTED: universal stress protein A-like protein isoform X2 [Malus domestica]	NA	NA	NA	-	47.7383	28.3211	25.0389	218.788	642.352	573.943
MD04G1197000	PREDICTED: topless-related protein 3-like isoform X1 [Malus domestica]	03008(Ribosome biogenesis in eukaryotes)	K14558	NA	-	11.6195	5.4989	6.26971	44.6953	19.802	15.1223
MD04G1200300	PREDICTED: F-actin-capping protein subunit alpha [Malus domestica]	04144(Endocytosis)	K10364	NA	K10364,ko04144,Endocytosis	12.1374	27.4838	26.6091	49.3553	105.421	85.4345
MD04G1204200	probable linoleate 9S-lipoxygenase 5 [Malus domestica]	00591(Linoleic acid metabolism)	K15718	EC:1.13.11.58	K15718,ko00591,Linoleic acid metabolism	0.91774	0.543229	0.329843	3.29646	4.93832	2.3848
MD04G1206500	PREDICTED: uncharacterized protein LOC103434099 [Malus domestica]	NA	NA	NA	-	6.29879	5.93397	6.49414	22.5066	16.8993	14.1909
MD04G1209400	PREDICTED: UPF0603 protein At1g54780, chloroplastic-like [Malus domestica]	NA	NA	NA	-	9.67771	3.56634	1.62573	26.0831	8.18503	5.90018
MD04G1213400	PREDICTED: uncharacterized protein LOC108173228 [Malus domestica]	NA	NA	NA	-	21.0801	26.4846	25.6846	80.8372	96.3396	71.4935
MD04G1216000	-	NA	NA	NA	-	44.4227	13.4793	13.9038	139.888	32.0616	30.6118
MD04G1216200	PREDICTED: basic proline-rich protein-like [Malus domestica]	NA	NA	NA	-	5.04026	2.58381	1.89986	47.9447	22.3418	21.3887
MD04G1216300	PREDICTED: basic proline-rich protein-like isoform X1 [Pyrus x bretschneideri]	NA	NA	NA	-	45.6675	9.82067	8.97706	216.232	49.6985	44.0454
MD04G1219000	PREDICTED: cysteine synthase-like [Malus domestica]	01200(Carbon metabolism);01230(Biosynthesis of amino acids);00920(Sulfur metabolism);00270(Cysteine and methionine metabolism)	K01738	EC:2.5.1.47	K01738,ko01200,Carbon metabolism;K01738,ko01230,Biosynthesis of amino acids;K01738,ko00920,Sulfur metabolism;K01738,ko00270,Cysteine and methionine metabolism	25.0094	16.8468	14.1488	99.797	56.057	45.7405
MD04G1219300	PREDICTED: uncharacterized protein LOC103434144 [Malus domestica]	NA	NA	NA	-	4.46868	7.84352	4.23006	14.7689	29.4844	26.6292
MD04G1224100	PREDICTED: GDP-mannose 3,5-epimerase 2 [Malus domestica]	00053(Ascorbate and aldarate metabolism);00520(Amino sugar and nucleotide sugar metabolism)	K10046	EC:5.1.3.18;EC:5.1.3.-	K10046,ko00520,Amino sugar and nucleotide sugar metabolism;K10046,ko00053,Ascorbate and aldarate metabolism	1.61565	0.450301	0.414928	13.3981	5.57237	4.6673
MD04G1224700	PREDICTED: transcription factor UNE12-like isoform X2 [Malus domestica]	04075(Plant hormone signal transduction);04712(Circadian rhythm - plant)	K12126	NA	-	1.07419	1.58261	0.843382	7.99109	10.0201	3.88245
MD04G1230800	PREDICTED: ankyrin repeat domain-containing protein 13B-like [Malus domestica]	NA	NA	NA	-	12.6527	13.1492	9.73942	50.1522	42.2712	37.6149
MD04G1230900	PREDICTED: ankyrin repeat domain-containing protein 13B-like [Malus domestica]	NA	NA	NA	-	13.8156	27.6297	21.1625	48.3737	90.9652	77.466
MD04G1231000	PREDICTED: uncharacterized protein LOC103434215 [Malus domestica]	NA	NA	NA	-	3.27356	4.19521	5.28406	12.9944	9.12377	10.273
MD04G1232700	PREDICTED: probable aminopyrimidine aminohydrolase, mitochondrial [Malus domestica]	00730(Thiamine metabolism)	K03707	EC:3.5.99.2	-	1.78005	0.36992	0.393885	7.72374	1.04305	0.66905
MD04G1241800	PREDICTED: protein encore-like isoform X1 [Malus domestica]	NA	NA	NA	-	5.00042	7.26983	6.04435	14.6848	19.7795	11.9432
MD04G1244000	PREDICTED: uncharacterized protein LOC103419526 [Malus domestica]	NA	NA	NA	-	1.71266	1.5687	1.11562	9.40198	8.26937	8.88799
MD04G1245900	PREDICTED: uncharacterized protein LOC103434278 [Malus domestica]	NA	NA	NA	-	3.31747	4.5085	1.06877	24.6134	20.5524	10.4424
MD04G1247600	PREDICTED: phospholipase A(1) LCAT3-like [Malus domestica]	NA	NA	NA	-	1.88484	1.50114	0.98724	13.4922	7.38947	7.8895
MD05G1000500	PREDICTED: chlorophyll a-b binding protein CP26, chloroplastic-like [Malus domestica]	00196(Photosynthesis - antenna proteins)	K08916	NA	K08916,ko00196,Photosynthesis - antenna proteins	45.9624	18.1925	7.83862	176.71	69.1072	44.4307
MD05G1002900	PREDICTED: polygalacturonase inhibitor 2-like [Malus domestica]	NA	NA	NA	-	49.805	9.46758	14.7734	240.545	43.2001	34.8862
MD05G1003400	PREDICTED: uncharacterized protein LOC103425130 isoform X1 [Malus domestica]	NA	NA	NA	-	41.55	212.041	209.217	136.598	784.38	497.588
MD05G1023900	PREDICTED: fructose-1,6-bisphosphatase, cytosolic isoform X1 [Malus domestica]	01200(Carbon metabolism);00010(Glycolysis / Gluconeogenesis);00030(Pentose phosphate pathway);00051(Fructose and mannose metabolism);00710(Carbon fixation in photosynthetic organisms)	K03841	EC:3.1.3.11	K03841,ko00051,Fructose and mannose metabolism;K03841,ko01200,Carbon metabolism;K03841,ko04152,AMPK signaling pathway;K03841,ko04910,Insulin signaling pathway;K03841,ko00030,Pentose phosphate pathway;K03841,ko00680,Methane metabolism;K03841,ko00710,Carbon fixation in photosynthetic organisms;K03841,ko00010,Glycolysis / Gluconeogenesis	0.712708	1.80093	1.72473	4.33656	5.16582	4.14084
MD05G1027000	PREDICTED: G-box-binding factor 4-like [Pyrus x bretschneideri]	04075(Plant hormone signal transduction)	K14432	NA	-	7.21394	14.0971	14.9423	21.6454	59.3904	36.0023
MD05G1027900	PREDICTED: protein SET DOMAIN GROUP 41 [Pyrus x bretschneideri]	NA	NA	NA	-	1.91947	0.721833	0.564354	5.34267	2.21216	1.99596
MD05G1029400	PREDICTED: cellulose synthase A catalytic subunit 2 [UDP-forming]-like [Malus domestica]	00500(Starch and sucrose metabolism);00520(Amino sugar and nucleotide sugar metabolism)	K00770	EC:2.4.2.24	-	15.6754	16.3229	15.3292	90.2873	36.6183	40.197
MD05G1042900	PREDICTED: protein EXORDIUM-like 2 [Malus domestica]	NA	NA	NA	-	4.66178	0.335389	0.146093	20.2154	1.36786	2.36572
MD05G1049800	PREDICTED: DNA polymerase V [Malus domestica]	NA	NA	NA	-	2.45225	1.07669	1.02217	6.5232	3.52902	2.47785
MD05G1051800	PREDICTED: auxin-induced protein 15A-like [Malus domestica]	04075(Plant hormone signal transduction)	K14488	NA	K14488,ko04075,Plant hormone signal transduction	8.18768	3.38348	3.93019	53.9382	7.52028	9.09179
MD05G1052000	PREDICTED: auxin-induced protein 15A-like [Malus domestica]	04075(Plant hormone signal transduction)	K14488	NA	K14488,ko04075,Plant hormone signal transduction	11.674	3.19014	2.7371	76.2501	7.00919	6.29431
MD05G1059300	PREDICTED: purple acid phosphatase-like [Malus domestica]	NA	NA	NA	-	30.2873	8.47977	6.47332	115.909	26.4712	22.5966
MD05G1065700	PREDICTED: CBS domain-containing protein CBSCBSPB1-like isoform X2 [Malus domestica]	04626(Plant-pathogen interaction)	K13436	EC:2.7.11.1	-	1.87987	2.10993	1.7156	7.59241	10.0713	6.2584
MD05G1070300	PREDICTED: deSI-like protein At4g17486 [Pyrus x bretschneideri]	NA	NA	NA	-	1.39413	0.701532	0.203722	5.39936	3.35568	2.13584
MD05G1071000	PREDICTED: plastid division protein PDV2-like [Malus domestica]	NA	NA	NA	-	14.6862	23.0962	24.2221	41.2584	92.3962	71.3527
MD05G1076000	PREDICTED: polyadenylate-binding protein RBP47-like [Pyrus x bretschneideri]	03013(RNA transport)	K03231	NA	-	75.4193	54.8555	51.2324	214.549	167.7	174.03
MD05G1087300	PREDICTED: cyclin-D3-1 [Malus domestica]	04075(Plant hormone signal transduction)	K14505	NA	K14505,ko04075,Plant hormone signal transduction	14.0491	7.92648	8.76824	39.2519	27.7236	36.2097
MD05G1092300	PREDICTED: probable indole-3-acetic acid-amido synthetase GH3.1 [Malus domestica]	04075(Plant hormone signal transduction)	K14487	NA	-	12.8368	4.19972	2.36345	34.2697	5.55618	8.95943
MD05G1099900	PREDICTED: hepatoma-derived growth factor-related protein 2-like isoform X2 [Prunus mume]	NA	NA	NA	-	7.78551	34.4537	30.5111	20.7418	115.623	93.1576
MD05G1100200	PREDICTED: TMV resistance protein N-like isoform X2 [Malus domestica]	03040(Spliceosome);04141(Protein processing in endoplasmic reticulum);04144(Endocytosis)	K03283	NA	-	9.07488	8.48089	6.57377	23.8249	19.4538	13.4047
MD05G1103100	PREDICTED: serine carboxypeptidase-like 1 isoform X2 [Pyrus x bretschneideri]	00940(Phenylpropanoid biosynthesis)	K09756	EC:3.4.16.-;EC:2.3.1.91	-	4.24032	0.843085	0.465705	24.1719	5.59237	2.53586
MD05G1114400	PREDICTED: uncharacterized protein LOC103414915 [Malus domestica]	NA	NA	NA	-	8.06774	16.4698	11.9452	44.5117	64.6347	52.8478
MD05G1122100	PREDICTED: glycerate dehydrogenase [Malus domestica]	01200(Carbon metabolism);00630(Glyoxylate and dicarboxylate metabolism);00260(Glycine, serine and threonine metabolism)	K15893	NA	K15893,ko00630,Glyoxylate and dicarboxylate metabolism;K15893,ko01200,Carbon metabolism;K15893,ko00260,Glycine, serine and threonine metabolism	20.5421	25.7229	17.797	163.978	140.183	67.7669
MD05G1123700	PREDICTED: uncharacterized protein LOC103946619 [Pyrus x bretschneideri]	00906(Carotenoid biosynthesis)	K09838	EC:1.14.13.90	-	6.63977	8.33963	15.8526	28.4166	50.9181	36.7296
MD05G1126600	PREDICTED: serine/threonine-protein kinase ATR [Pyrus x bretschneideri]	03015(mRNA surveillance pathway)	K08873	EC:2.7.11.1	K06640,ko05166,HTLV-I infection;K06640,ko04115,p53 signaling pathway;K06640,ko04214,Apoptosis - fly;K06640,ko03460,Fanconi anemia pathway;K06640,ko04110,Cell cycle	0.189192	0.048206	0.047496	1.12164	0.296469	0.31761
MD05G1143500	3-hydroxy-3-methylglutaryl coenzyme A reductase [Pyrus communis]3-羟基-3-甲基戊二酰辅酶A还原酶，α-法尼烯生物代谢调控中的关键酶	00900(Terpenoid backbone biosynthesis)	K00021	EC:1.1.1.34	-	382.428	76.426	85.617	2952.79	1133.64	804.66
MD05G1145200	PREDICTED: TMV resistance protein N-like [Pyrus x bretschneideri]	03040(Spliceosome);04141(Protein processing in endoplasmic reticulum);04144(Endocytosis)	K03283	NA	-	11.8002	7.25736	8.08425	43.2087	17.4144	16.2091
MD05G1149800	-	NA	NA	NA	-	14.1273	20.1805	15.5608	55.413	72.3584	48.5898
MD05G1150400	-	NA	NA	NA	-	5.18768	2.56782	2.64717	14.4211	8.10666	5.52665
MD05G1158400	PREDICTED: uncharacterized protein LOC103433319 [Malus domestica]	NA	NA	NA	-	0.906409	1.10296	0.99291	11.3941	7.71383	6.06432
MD05G1163800	PREDICTED: ras-related protein RABA5b-like [Malus domestica]	04144(Endocytosis)	K07904	NA	-	3.40248	4.8033	3.06188	15.8308	8.87036	9.87927
MD05G1166200	PREDICTED: peptidyl-prolyl cis-trans isomerase FKBP62 [Malus domestica]	03030(DNA replication);03420(Nucleotide excision repair);03430(Mismatch repair);03440(Homologous recombination)	K07466	NA	K09571,ko04915,Estrogen signaling pathway	10.428	80.4246	85.7577	30.146	165.834	176.803
MD05G1179800	PREDICTED: alcohol dehydrogenase-like [Malus domestica]	00010(Glycolysis / Gluconeogenesis);00071(Fatty acid degradation);00592(alpha-Linolenic acid metabolism);00350(Tyrosine metabolism)	K18857	EC:1.1.1.1	-	22.6575	5.88206	5.69788	145.199	94.7266	65.5164
MD05G1182800	PREDICTED: CLIP-associated protein-like isoform X1 [Malus domestica]	00230(Purine metabolism);00240(Pyrimidine metabolism);03020(RNA polymerase)	K03013	NA	-	3.5416	1.20233	1.09231	11.5409	2.84092	2.75162
MD05G1183600	PREDICTED: uncharacterized protein LOC103435787 isoform X2 [Malus domestica]	NA	NA	NA	-	0.648515	0.186419	0.492138	5.03161	2.45113	1.77777
MD05G1187900	PREDICTED: xyloglucan galactosyltransferase MUR3-like [Malus domestica]	NA	NA	NA	-	5.22923	4.65096	4.66634	14.4439	11.7382	10.1883
MD05G1189100	PREDICTED: uncharacterized protein LOC103435761 [Malus domestica]	NA	NA	NA	-	1.4538	0.249631	0.181229	8.23945	3.29942	1.82478
MD05G1196400	PREDICTED: TOM1-like protein 2 [Malus domestica]	NA	NA	NA	-	39.9178	77.9375	73.6575	119.626	252.553	222.576
MD05G1204800	PREDICTED: magnesium transporter MRS2-I-like [Malus domestica]	NA	NA	NA	-	2.27397	1.11658	0.704891	7.2218	2.85995	2.88289
MD05G1209300	PREDICTED: peroxisomal (S)-2-hydroxy-acid oxidase isoform X1 [Malus domestica]	01200(Carbon metabolism);00630(Glyoxylate and dicarboxylate metabolism);04146(Peroxisome)	K11517	EC:1.1.3.15	K11517,ko04146,Peroxisome;K11517,ko01200,Carbon metabolism;K11517,ko00630,Glyoxylate and dicarboxylate metabolism	4.80596	0.986043	0.389325	64.0492	8.42717	4.53669
MD05G1210000	PREDICTED: probable glutathione S-transferase [Malus domestica]	00480(Glutathione metabolism)	K00799	EC:2.5.1.18	-	20.0276	16.4057	25.6721	89.8246	79.7157	37.4102
MD05G1210200	PREDICTED: probable glutathione S-transferase isoform X1 [Malus domestica]	00480(Glutathione metabolism)	K00799	EC:2.5.1.18	-	2.7856	2.01782	4.04317	13.1436	10.5156	11.6419
MD05G1213200	hypothetical protein PRUPE_ppa006495mg [Prunus persica]	NA	NA	NA	-	0.756711	2.59945	3.01222	4.13861	8.58937	5.13092
MD05G1223000	PREDICTED: acetylornithine aminotransferase, mitochondrial-like [Malus domestica]	01210(2-Oxocarboxylic acid metabolism);01230(Biosynthesis of amino acids);00220(Arginine biosynthesis)	K00818	EC:2.6.1.11	K00818,ko01210,2-Oxocarboxylic acid metabolism;K00818,ko00220,Arginine biosynthesis;K00818,ko01230,Biosynthesis of amino acids	4.40289	13.6656	12.3473	12.9382	34.2124	34.7402
MD05G1231700	PREDICTED: G-type lectin S-receptor-like serine/threonine-protein kinase At4g27290 isoform X1 [Malus domestica]	00520(Amino sugar and nucleotide sugar metabolism)	K01183	EC:3.2.1.14	-	1.57118	0.650853	0.433136	7.71229	2.44146	2.60936
MD05G1233100	PREDICTED: NAC domain-containing protein 68-like [Malus domestica]	NA	NA	NA	-	2.14476	1.34898	1.07262	5.9088	3.12931	2.41077
MD05G1236300	PREDICTED: leucine-rich repeat receptor-like serine/threonine-protein kinase At1g17230 [Pyrus x bretschneideri]	04626(Plant-pathogen interaction)	K13466	NA	-	4.44064	0.873949	0.862061	20.889	3.24293	2.29367
MD05G1238600	PREDICTED: organic cation/carnitine transporter 2-like [Malus domestica]	NA	NA	NA	-	0.81851	0.152875	0.138732	3.46711	0.663903	0.708517
MD05G1250500	PREDICTED: protein NAP1 [Malus domestica]	NA	NA	NA	-	1.96427	1.0106	0.818887	6.10716	1.72845	1.9929
MD05G1264000	PREDICTED: 60S ribosomal protein L8-3-like [Malus domestica]	03010(Ribosome)	K02938	NA	K02938,ko03010,Ribosome	124.917	110.64	107.117	329.458	405.827	384.637
MD05G1264700	PREDICTED: protein G1-like1 [Pyrus x bretschneideri]	NA	NA	NA	-	2.13976	0.902261	0.982547	16.16	9.71065	8.47984
MD05G1272700	PREDICTED: WPP domain-associated protein-like [Malus domestica]	NA	NA	NA	-	0.678017	1.15656	1.37573	3.23375	10.0857	7.24083
MD05G1278400	PREDICTED: uncharacterized protein LOC103952408 [Pyrus x bretschneideri]	03013(RNA transport)	K14315	NA	K14315,ko03013,RNA transport	10.6807	4.18603	4.00597	41.1288	14.8402	11.0468
MD05G1279200	PREDICTED: auxin response factor 6-like isoform X1 [Malus domestica]	04075(Plant hormone signal transduction)	K14486	NA	-	2.09187	0.240861	0.349724	7.61964	1.08475	1.04874
MD05G1280200	hypothetical protein B456_011G047900 [Gossypium raimondii]	00900(Terpenoid backbone biosynthesis)	K14066	EC:2.5.1.1	-	1.14301	0.987753	0.633281	4.24688	6.91762	6.14828
MD05G1280300	PREDICTED: uncharacterized protein LOC103419769 [Malus domestica]	NA	NA	NA	-	12.0838	3.59287	3.10108	46.0764	12.2714	9.24186
MD05G1285700	PREDICTED: urease accessory protein G [Malus domestica]	NA	NA	NA	-	31.0847	37.6065	42.2739	86.0294	98.1535	81.4621
MD05G1289200	PREDICTED: chlorophyll a-b binding protein of LHCII type 1 [Malus domestica]	00196(Photosynthesis - antenna proteins)	K08912	NA	-	4.52637	2.22416	0.753532	31.4754	9.54706	3.28519
MD05G1289300	PREDICTED: chlorophyll a-b binding protein of LHCII type 1-like [Malus domestica]	00196(Photosynthesis - antenna proteins)	K08912	NA	-	30.9384	8.71734	2.00098	253.331	42.7471	17.3315
MD05G1292900	PREDICTED: transcription factor GTE12 [Malus domestica]	NA	NA	NA	-	21.5753	47.1105	36.5003	69.7733	152.227	111.506
MD05G1301200	PREDICTED: dihydroorotate dehydrogenase (quinone), mitochondrial-like [Malus domestica]	00240(Pyrimidine metabolism)	K00254	EC:1.3.5.2	K00254,ko00240,Pyrimidine metabolism	2.44076	2.73032	2.6875	6.87906	6.26228	5.39258
MD05G1301400	PREDICTED: 14-3-3-like protein D [Malus domestica]	NA	NA	NA	-	71.9672	148.9	149.805	213.299	352.966	316.007
MD05G1309600	PREDICTED: guanylate-binding protein 4-like [Malus domestica]	NA	NA	NA	-	9.67609	18.299	16.4546	27.9827	60.652	43.8999
MD05G1312000	PREDICTED: putative E3 ubiquitin-protein ligase RING1a [Malus domestica]	NA	NA	NA	-	11.0438	36.5088	34.2157	40.7557	138.713	99.9816
MD05G1325400	PREDICTED: F-box protein At1g61340-like [Malus domestica]	NA	NA	NA	-	1.34374	0	0.529258	7.49613	1.60946	1.57209
MD05G1326300	PREDICTED: uncharacterized protein LOC103419665 [Malus domestica]	NA	NA	NA	-	1.26429	1.1138	0.523217	7.56454	6.35863	3.8808
MD05G1329600	PREDICTED: G-type lectin S-receptor-like serine/threonine-protein kinase B120, partial [Malus domestica]	00520(Amino sugar and nucleotide sugar metabolism)	K01183	EC:3.2.1.14	-	5.07963	4.46342	3.82237	17.3522	12.4902	15.9753
MD05G1333700	PREDICTED: G-type lectin S-receptor-like serine/threonine-protein kinase At1g11410 isoform X2 [Pyrus x bretschneideri]	00500(Starch and sucrose metabolism);00460(Cyanoamino acid metabolism);00940(Phenylpropanoid biosynthesis)	K05349	EC:3.2.1.21	-	0.505381	0.115597	0.0671377	2.08677	0.742107	0.397238
MD05G1335400	PREDICTED: uncharacterized protein LOC103434635 isoform X2 [Malus domestica]	NA	NA	NA	-	38.2725	30.1801	25.0088	110.103	107.943	104.237
MD05G1336200	PREDICTED: oxygen-evolving enhancer protein 3-2, chloroplastic [Malus domestica]	00195(Photosynthesis)	K08901	NA	K08901,ko00195,Photosynthesis	52.3523	28.1192	10.7094	188.788	81.5978	53.4545
MD05G1336400	PREDICTED: thioredoxin-like protein CXXS1 [Malus domestica]	NA	NA	NA	-	17.4234	25.4637	24.3339	290.576	695.733	416.973
MD05G1336900	PREDICTED: eukaryotic translation initiation factor 3 subunit E [Vitis vinifera]	03013(RNA transport)	K03250	NA	-	5.443	5.82729	4.87643	26.5735	14.5138	10.1372
MD05G1341900	PREDICTED: CRIB domain-containing protein RIC10-like isoform X2 [Malus domestica]	NA	NA	NA	-	0.900552	0.32777	0.297447	9.01888	5.07487	5.22419
MD05G1345400	PREDICTED: autophagy-related protein 8C-like [Malus domestica]	04140(Regulation of autophagy)	K08341	NA	-	6.76292	20.6742	25.8539	86.5146	71.827	62.4433
MD05G1352700	PREDICTED: translation initiation factor IF-2 [Malus domestica]	NA	NA	NA	-	1.15581	1.43681	1.59534	3.93558	6.00037	4.433
MD05G1355900	PREDICTED: uncharacterized membrane protein At1g16860-like isoform X1 [Malus domestica]	NA	NA	NA	-	1.68406	0.582746	0.906572	4.76661	2.35783	2.48436
MD05G1356500	PREDICTED: uncharacterized protein LOC103434446 [Malus domestica]	NA	NA	NA	-	9.52082	15.5457	17.187	25.0826	60.0813	32.816
MD05G1361500	PREDICTED: trihelix transcription factor GTL1-like [Pyrus x bretschneideri]	NA	NA	NA	-	0.734173	0.845627	0.977717	2.75367	4.04494	3.37041
MD05G1362400	PREDICTED: U-box domain-containing protein 35 isoform X1 [Malus domestica]	NA	NA	NA	-	2.76594	8.91651	6.15047	8.92221	22.8544	14.2431
MD06G1001600	PREDICTED: titin homolog [Malus domestica]	NA	NA	NA	-	4.41129	9.21395	11.5466	28.2931	22.1711	35.7018
MD06G1002100	PREDICTED: bZIP transcription factor 60 [Malus domestica]	NA	NA	NA	-	45.2313	15.0134	16.5392	177.106	55.0425	34.1787
MD06G1003300	PREDICTED: cinnamoyl-CoA reductase 1-like [Malus domestica]	00940(Phenylpropanoid biosynthesis)	K09753	EC:1.2.1.44	-	23.0647	19.0679	18.5954	120.846	88.4308	46.685
MD06G1006400	glyceraldehyde-3-phosphate dehydrogenase B [Pyrus x bretschneideri]	01200(Carbon metabolism);00710(Carbon fixation in photosynthetic organisms)	K05298	EC:1.2.1.13	K05298,ko00710,Carbon fixation in photosynthetic organisms;K05298,ko01200,Carbon metabolism	3.11412	1.21359	0.256974	23.8333	4.54474	1.73766
MD06G1021000	PREDICTED: trihelix transcription factor GT-3b-like [Malus domestica]	NA	NA	NA	-	6.91344	53.9538	50.0416	19.7286	184.226	137.719
MD06G1023500	PREDICTED: phosphoribulokinase, chloroplastic [Malus domestica]	01200(Carbon metabolism);00710(Carbon fixation in photosynthetic organisms)	K00855	EC:2.7.1.19	K00855,ko01200,Carbon metabolism;K00855,ko00710,Carbon fixation in photosynthetic organisms	23.3036	10.8027	5.92474	88.8546	61.8148	40.035
MD06G1024300	PREDICTED: disease resistance protein RPM1-like [Malus domestica]	04626(Plant-pathogen interaction)	K13457	NA	-	0.389428	0.154522	0.0981585	3.21925	2.80093	1.04803
MD06G1025000	PREDICTED: extra-large guanine nucleotide-binding protein 3 [Malus domestica]	NA	NA	NA	-	25.7517	12.4147	13.774	114.754	90.4465	61.6205
MD06G1031000	PREDICTED: glycine cleavage system H protein 3, mitochondrial [Malus domestica]	00630(Glyoxylate and dicarboxylate metabolism);00260(Glycine, serine and threonine metabolism)	K02437	NA	-	5.07441	1.67126	0.242663	40.2279	10.2999	4.20154
MD06G1032200	PREDICTED: plant intracellular Ras-group-related LRR protein 5-like [Malus domestica]	00970(Aminoacyl-tRNA biosynthesis)	K01866	EC:6.1.1.1	-	16.0467	16.9314	16.0959	112.046	144.385	99.544
MD06G1035300	PREDICTED: uncharacterized protein LOC103436902 [Malus domestica]	NA	NA	NA	-	2.45642	1.9058	0.962495	16.6958	7.82276	3.74662
MD06G1036900	PREDICTED: uncharacterized protein LOC103436913 [Malus domestica]	NA	NA	NA	-	84.1577	150.43	140.581	458.855	997.813	752.516
MD06G1038500	PREDICTED: ATP-dependent zinc metalloprotease FTSH 11, chloroplastic/mitochondrial [Malus domestica]	03050(Proteasome)	K03064	NA	-	25.4022	32.4097	29.4036	88.6641	119.322	71.4926
MD06G1043800	PREDICTED: uncharacterized protein LOC103961074 [Pyrus x bretschneideri]	NA	NA	NA	-	2.35167	1.42084	1.35236	11.1483	4.43264	3.72477
MD06G1052300	PREDICTED: carboxylesterase 1-like [Malus domestica]	04075(Plant hormone signal transduction)	K14493	EC:3.-.-.-	-	2.11683	1.32533	2.61711	6.32341	3.32324	11.4578
MD06G1060200	PREDICTED: vesicle-associated protein 1-2-like [Malus domestica]	NA	NA	NA	-	27.218	7.25192	7.76337	133.249	45.3644	52.4457
MD06G1075800	PREDICTED: geraniol 8-hydroxylase-like isoform X1 [Malus domestica]	00941(Flavonoid biosynthesis);00944(Flavone and flavonol biosynthesis)	K13083	EC:1.14.13.88	-	6.34975	7.88042	10.2347	19.9888	29.4002	43.403
MD06G1076000	PREDICTED: cytochrome P450 76M5-like isoform X1 [Malus domestica]	00941(Flavonoid biosynthesis);00944(Flavone and flavonol biosynthesis)	K05280	EC:1.14.13.21	-	10.2131	16.3876	17.7478	27.5939	61.0503	64.0554
MD06G1089200	PREDICTED: beta-carotene hydroxylase 2, chloroplastic-like isoform X1 [Pyrus x bretschneideri]	00906(Carotenoid biosynthesis)	K15746	EC:1.14.13.129	-	4.98633	3.41864	4.13162	13.6605	11.6493	23.4775
MD06G1108400	PREDICTED: uncharacterized protein LOC103949237 [Pyrus x bretschneideri]	NA	NA	NA	-	2.99407	0.861329	0.468986	7.96872	2.77494	1.82558
MD06G1115800	PREDICTED: uncharacterized protein LOC103401427 isoform X1 [Malus domestica]	04075(Plant hormone signal transduction)	K13415	EC:2.7.10.1;EC:2.7.11.1	K13415,ko04075,Plant hormone signal transduction	0.301136	0.287808	0.235064	1.33069	4.43575	2.6759
MD06G1122000	PREDICTED: glucan endo-1,3-beta-glucosidase 11-like [Malus domestica]	00500(Starch and sucrose metabolism)	K19891	EC:3.2.1.39	-	2.20297	1.10949	1.20821	11.2848	3.46507	3.29471
MD06G1124900	PREDICTED: E3 ubiquitin-protein ligase MARCH3 isoform X2 [Malus domestica]	NA	NA	NA	-	1.7611	1.58638	1.25331	9.74511	5.84974	3.75524
MD06G1127300	PREDICTED: actin-7 [Malus domestica]	04145(Phagosome)	K05692	NA	-	94.6072	40.7792	39.5369	334.375	149.894	147.189
MD06G1127400	PREDICTED: RING-H2 finger protein ATL79-like [Malus domestica]	NA	NA	NA	-	1.82746	0.0908795	0.131955	6.99032	8.68276	7.80746
MD06G1133700	PREDICTED: U-box domain-containing protein 11 [Malus domestica]	NA	NA	NA	-	1.49202	2.00762	1.90895	4.53129	4.99168	4.54684
MD06G1135200	PREDICTED: uncharacterized protein LOC103934197 [Pyrus x bretschneideri]	NA	NA	NA	-	0.177054	0.116754	0.0770566	1.25289	0.244501	0.451126
MD06G1142100	PREDICTED: uncharacterized protein LOC103437536 isoform X1 [Malus domestica]	03008(Ribosome biogenesis in eukaryotes)	K07178	EC:2.7.11.1	-	10.2603	6.75321	6.31732	29.2262	16.054	16.3188
MD06G1148800	PREDICTED: glyceraldehyde-3-phosphate dehydrogenase, cytosolic-like [Pyrus x bretschneideri]	01200(Carbon metabolism);01230(Biosynthesis of amino acids);00010(Glycolysis / Gluconeogenesis);00710(Carbon fixation in photosynthetic organisms)	K00134	EC:1.2.1.12	K00134,ko01200,Carbon metabolism;K00134,ko01230,Biosynthesis of amino acids;K00134,ko04066,HIF-1 signaling pathway;K00134,ko05010,Alzheimer's disease;K00134,ko00710,Carbon fixation in photosynthetic organisms;K00134,ko00010,Glycolysis / Gluconeogenesis	0.898473	0.524992	1.05546	5.07755	1.81479	2.11816
MD06G1149300	PREDICTED: flavonol 4'-sulfotransferase-like [Pyrus x bretschneideri]	00966(Glucosinolate biosynthesis)	NA	NA	-	2.35677	6.23937	5.5408	14.501	23.1412	32.9474
MD06G1152200	PREDICTED: elongator complex protein 3 [Pyrus x bretschneideri]	NA	NA	NA	-	1.26011	2.5264	2.41456	4.15129	10.2168	6.10208
MD06G1161700	PREDICTED: leucine-rich repeat receptor-like serine/threonine/tyrosine-protein kinase SOBIR1 [Malus domestica]	04075(Plant hormone signal transduction)	K13415	EC:2.7.10.1;EC:2.7.11.1	-	4.25026	0.303176	0.29871	26.6093	0.825959	2.31083
MD06G1165300	PREDICTED: probable serine/threonine-protein kinase WNK3 isoform X1 [Malus domestica]	04075(Plant hormone signal transduction)	K14510	EC:2.7.11.1	-	1.77644	0.683713	0.690262	4.90404	1.46041	1.74861
MD06G1166600	PREDICTED: DEAD-box ATP-dependent RNA helicase 20-like [Malus domestica]	03040(Spliceosome)	K12823	EC:3.6.4.13	K12823,ko03040,Spliceosome;K12823,ko05202,Transcriptional misregulation in cancer;K12823,ko05205,Proteoglycans in cancer	12.8791	10.9947	11.264	43.7829	23.4923	23.0071
MD06G1170100	PREDICTED: probable kinetochore protein SPC25 [Malus domestica]	NA	NA	NA	-	2.01149	1.7222	1.47094	13.7736	18.608	15.2626
MD06G1170200	PREDICTED: probable LRR receptor-like serine/threonine-protein kinase At4g26540 [Malus domestica]	04075(Plant hormone signal transduction)	K13415	EC:2.7.10.1;EC:2.7.11.1	-	0.296516	0.0760835	0.0552358	7.15122	0.522918	1.02517
MD06G1173800	PREDICTED: probable inactive poly [ADP-ribose] polymerase SRO5 [Malus domestica]	NA	NA	NA	-	5.05838	0.506384	0.490172	32.6174	28.8648	18.4826
MD06G1178700	PREDICTED: uncharacterized protein LOC103437750 [Malus domestica]	NA	NA	NA	-	1.86067	3.15814	1.7578	6.97569	13.4766	8.49649
MD06G1181900	PREDICTED: protein SUPPRESSOR OF GENE SILENCING 3-like [Malus domestica]	03040(Spliceosome);04141(Protein processing in endoplasmic reticulum);04144(Endocytosis)	K03283	NA	-	1.27705	1.82327	2.12777	4.6548	16.9108	18.8612
MD06G1182000	PREDICTED: anaphase-promoting complex subunit 8 [Malus domestica]	04120(Ubiquitin mediated proteolysis)	K03355	NA	K03355,ko04110,Cell cycle;K03355,ko04120,Ubiquitin mediated proteolysis;K03355,ko04111,Cell cycle - yeast;K03355,ko05166,HTLV-I infection;K03355,ko04113,Meiosis - yeast;K03355,ko04914,Progesterone-mediated oocyte maturation;K03355,ko04114,Oocyte meiosis	7.7793	9.56461	9.60269	24.2213	26.5335	21.9739
MD06G1182600	PREDICTED: protein EDS1L-like [Malus domestica]	04626(Plant-pathogen interaction)	K18875	NA	K18875,ko04626,Plant-pathogen interaction	2.51906	1.22386	1.5145	6.96812	3.90745	5.60925
MD06G1185000	PREDICTED: AAA-ATPase ASD, mitochondrial-like [Pyrus x bretschneideri]	03008(Ribosome biogenesis in eukaryotes)	K14575	NA	-	1.10729	6.42375	2.89897	12.0909	36.4529	34.299
MD06G1185200	PREDICTED: HIPL1 protein-like [Malus domestica]	NA	NA	NA	-	7.3973	5.61226	6.12709	24.0027	15.8552	17.5423
MD06G1193900	PREDICTED: geranylgeranyl diphosphate reductase, chloroplastic [Malus domestica]	00860(Porphyrin and chlorophyll metabolism);00900(Terpenoid backbone biosynthesis)	K10960	EC:1.3.1.83	K10960,ko00860,Porphyrin and chlorophyll metabolism;K10960,ko00900,Terpenoid backbone biosynthesis	3.46317	8.64237	4.87063	10.1447	30.709	17.8863
MD06G1195600	PREDICTED: photosynthetic NDH subunit of subcomplex B 4, chloroplastic-like [Malus domestica]	NA	NA	NA	-	4.95914	8.32806	2.1524	37.9458	74.0953	58.9844
MD06G1197300	PREDICTED: two-component response regulator-like APRR1 [Malus domestica]	04712(Circadian rhythm - plant)	K12127	NA	-	8.67578	5.23563	4.45984	37.4721	46.9375	27.3032
MD06G1201700	PREDICTED: flavonoid 3'-monooxygenase [Malus domestica]	00941(Flavonoid biosynthesis);00944(Flavone and flavonol biosynthesis)	K05280	EC:1.14.13.21	K05280,ko00944,Flavone and flavonol biosynthesis;K05280,ko00941,Flavonoid biosynthesis	8.13894	1.23387	1.83749	30.7007	11.3979	5.62197
MD06G1202000	PREDICTED: PLASMODESMATA CALLOSE-BINDING PROTEIN 3-like [Malus domestica]	00500(Starch and sucrose metabolism)	K19891	EC:3.2.1.39	-	2.54674	2.05565	2.52976	12.1488	11.1141	13.0127
MD06G1206100	PREDICTED: uncharacterized protein At1g04910-like [Malus domestica]	00561(Glycerolipid metabolism);00564(Glycerophospholipid metabolism)	K13506	EC:2.3.1.15	-	0.950811	1.10337	1.36175	3.88233	2.60001	2.46455
MD06G1210500	PREDICTED: uncharacterized protein LOC103428315 [Malus domestica]	NA	NA	NA	-	4.55906	4.98961	4.39863	27.894	97.5322	71.1744
MD06G1216300	PREDICTED: uncharacterized protein LOC103428317 [Malus domestica]	NA	NA	NA	-	325.432	994.876	639.967	2397.91	4712.05	3458.63
MD06G1216600	PREDICTED: CRM-domain containing factor CFM3, chloroplastic/mitochondrial-like [Malus domestica]	03018(RNA degradation)	K01148	EC:3.1.13.4	-	9.02604	15.5229	12.6961	29.0805	54.174	41.6086
MD06G1216900	PREDICTED: uncharacterized protein LOC103438004 [Malus domestica]	NA	NA	NA	-	9.30235	7.47866	7.04292	24.4845	23.97	19.636
MD06G1217200	PREDICTED: transcription factor WER [Malus domestica]	00190(Oxidative phosphorylation);00860(Porphyrin and chlorophyll metabolism)	K02259	NA	-	8.29081	11.1561	11.9231	22.1217	28.5218	35.4686
MD06G1218900	PREDICTED: LEAF RUST 10 DISEASE-RESISTANCE LOCUS RECEPTOR-LIKE PROTEIN KINASE-like 1.2 isoform X3 [Malus domestica]	04626(Plant-pathogen interaction)	K13430	EC:2.7.11.1	-	1.65447	0.172486	0.178889	7.35891	1.76799	0.980456
MD06G1220700	PREDICTED: uncharacterized protein LOC103438030 [Malus domestica]	03013(RNA transport)	K14297	NA	-	6.22	5.01604	2.32618	17.7061	11.0629	7.27844
MD06G1233800	PREDICTED: caffeoylshikimate esterase-like [Malus domestica]	00561(Glycerolipid metabolism)	K01054	EC:3.1.1.23	K01054,ko00561,Glycerolipid metabolism;K01054,ko04723,Retrograde endocannabinoid signaling;K01054,ko04923,Regulation of lipolysis in adipocytes	2.54016	0.86876	0.904018	13.3183	12.5215	10.3573
MD06G1235500	PREDICTED: glutamate decarboxylase 4-like [Pyrus x bretschneideri]	00650(Butanoate metabolism);00250(Alanine, aspartate and glutamate metabolism);00410(beta-Alanine metabolism);00430(Taurine and hypotaurine metabolism)	K01580	EC:4.1.1.15	K01580,ko00650,Butanoate metabolism;K01580,ko00250,Alanine, aspartate and glutamate metabolism;K01580,ko00430,Taurine and hypotaurine metabolism;K01580,ko04940,Type I diabetes mellitus;K01580,ko04727,GABAergic synapse;K01580,ko02024,Quorum sensing;K01580,ko00410,beta-Alanine metabolism	3.74953	0.911128	1.05835	49.0447	15.013	4.86129
MD06G1238400	PREDICTED: kinase-interacting family protein-like [Malus domestica]	NA	NA	NA	-	13.0025	17.7112	20.5973	103.416	267.566	260.547
MD07G1013100	PREDICTED: uncharacterized protein LOC103945892 isoform X1 [Pyrus x bretschneideri]	NA	NA	NA	-	6.90165	10.1949	9.18815	21.4398	39.9221	27.0847
MD07G1051100	PREDICTED: uncharacterized protein LOC103438639 [Malus domestica]	NA	NA	NA	-	5.03934	11.9747	7.27019	82.3361	40.3139	28.6281
MD07G1051200	PREDICTED: uncharacterized protein LOC103438639 [Malus domestica]	NA	NA	NA	-	2.96327	17.5585	10.8006	37.8439	60.1661	44.1936
MD07G1062200	PREDICTED: uricase-2 isozyme 1-like [Malus domestica]	00230(Purine metabolism);00232(Caffeine metabolism)	K00365	EC:1.7.3.3	K00365,ko00232,Caffeine metabolism;K00365,ko00230,Purine metabolism	89.5297	52.8761	49.5779	488.476	339.846	214.937
MD07G1070400	PREDICTED: LEAF RUST 10 DISEASE-RESISTANCE LOCUS RECEPTOR-LIKE PROTEIN KINASE-like 2.1 [Pyrus x bretschneideri]	00520(Amino sugar and nucleotide sugar metabolism)	K01183	EC:3.2.1.14	-	0.540503	0.220427	0.405403	2.91395	0.688123	0.797342
MD07G1072900	PREDICTED: pyruvate kinase 1, cytosolic-like [Pyrus x bretschneideri]	01200(Carbon metabolism);01230(Biosynthesis of amino acids);00010(Glycolysis / Gluconeogenesis);00620(Pyruvate metabolism);00230(Purine metabolism)	K00873	EC:2.7.1.40	-	13.5976	2.96717	2.91955	63.5451	19.5661	15.7726
MD07G1075600	PREDICTED: SEC12-like protein 1 [Malus domestica]	04141(Protein processing in endoplasmic reticulum)	K14003	NA	K14003,ko04141,Protein processing in endoplasmic reticulum	0.995263	0.689719	0.584183	3.52654	3.02425	2.30431
MD07G1079300	PREDICTED: disease resistance protein RML1B-like [Malus domestica]	03040(Spliceosome);04141(Protein processing in endoplasmic reticulum);04144(Endocytosis)	K03283	NA	-	1.09867	1.16918	0.824086	5.86741	4.62096	2.09408
MD07G1108300	PREDICTED: putative DEAD-box ATP-dependent RNA helicase 29 isoform X1 [Pyrus x bretschneideri]	03040(Spliceosome)	K12835	EC:3.6.4.13	-	15.9605	38.7928	38.4435	51.3206	138.323	146.708
MD07G1108500	uncharacterized LOC103447875 [Malus domestica]	NA	NA	NA	-	1.74436	1.62473	2.1313	4.74936	9.73222	10.9131
MD07G1108600	uncharacterized LOC103447875 [Malus domestica]	NA	NA	NA	-	2.11052	0.797592	1.70307	6.73628	3.89785	4.83679
MD07G1111800	PREDICTED: uncharacterized protein LOC103439025 isoform X1 [Malus domestica]	NA	NA	NA	-	19.596	6.06708	7.78897	73.5354	25.4743	21.6363
MD07G1127900	PREDICTED: probable methyltransferase PMT15 [Malus domestica]	NA	NA	NA	-	1.54314	1.11828	0.763536	6.76812	6.76689	10.173
MD07G1130000	PREDICTED: delta(8)-fatty-acid desaturase 1-like [Malus domestica]	00910(Nitrogen metabolism)	K10534	EC:1.7.1.1;EC:1.7.1.2	-	1.31059	0.462398	0.530045	25.4399	15.256	10.85
MD07G1140300	PREDICTED: remorin-like [Malus domestica]	NA	NA	NA	-	96.7827	282.356	251.575	253.895	760.181	687.186
MD07G1143200	PREDICTED: BTB/POZ domain-containing protein POB1-like [Malus domestica]	NA	NA	NA	-	39.1497	12.7127	10.5493	125.039	45.7298	36.6682
MD07G1151000	PREDICTED: transcription factor bHLH13 [Malus domestica]	04075(Plant hormone signal transduction)	K13422	NA	-	1.58292	2.42496	2.79813	10.0552	9.99437	6.73854
MD07G1155800	PREDICTED: uncharacterized protein LOC103402033 [Malus domestica]	NA	NA	NA	-	3.88905	2.12587	2.23294	21.8594	8.30131	4.86751
MD07G1159800	PREDICTED: uncharacterized protein LOC103431948 [Malus domestica]	NA	NA	NA	-	3.19604	8.74915	7.76044	12.6588	41.353	30.2283
MD07G1160900	PREDICTED: protein CURVATURE THYLAKOID 1B, chloroplastic isoform X1 [Pyrus x bretschneideri]	NA	NA	NA	-	1.29608	1.23151	0.32843	23.7691	3.87232	2.20461
MD07G1164200	PREDICTED: uncharacterized calcium-binding protein At1g02270-like [Malus domestica]	NA	NA	NA	-	0.697569	0.386878	0.410501	10.4931	2.95568	3.60625
MD07G1170100	hypothetical protein PRUPE_ppa002830mg [Prunus persica]	00564(Glycerophospholipid metabolism)	K00111	EC:1.1.5.3	K00111,ko00564,Glycerophospholipid metabolism	0.573091	0.480496	0.483001	2.11618	1.11662	1.40383
MD07G1173900	PREDICTED: GATA transcription factor 8-like [Malus domestica]	NA	NA	NA	-	1.45253	0.309033	0.361459	15.2966	1.90612	1.44389
MD07G1177400	PREDICTED: E3 SUMO-protein ligase SIZ1-like [Malus domestica]	04120(Ubiquitin mediated proteolysis)	K04706	NA	-	2.02716	0.999368	0.888048	5.5378	3.07351	2.32082
MD07G1182300	PREDICTED: two-component response regulator-like PRR73 [Malus domestica]	04712(Circadian rhythm - plant)	K12129	NA	-	1.15863	4.23318	3.73973	12.0205	17.3149	12.9834
MD07G1182500	PREDICTED: two-component response regulator-like PRR37 [Pyrus x bretschneideri]	04712(Circadian rhythm - plant)	K12129	NA	-	3.23403	6.76685	5.28767	10.8176	12.3153	12.3477
MD07G1194400	PREDICTED: ACT domain-containing protein ACR9 isoform X2 [Malus domestica]	NA	NA	NA	-	47.941	14.8208	13.5509	168.823	76.5907	55.7105
MD07G1195500	PREDICTED: ubiquitin-conjugating enzyme E2 7-like, partial [Pyrus x bretschneideri]	04141(Protein processing in endoplasmic reticulum);04120(Ubiquitin mediated proteolysis)	K10575	EC:2.3.2.23	K10575,ko04141,Protein processing in endoplasmic reticulum;K10575,ko05012,Parkinson's disease;K10575,ko04120,Ubiquitin mediated proteolysis	6.45998	1.98729	1.39545	23.5427	3.07569	3.94781
MD07G1198900	PREDICTED: uncharacterized protein LOC103435083 [Malus domestica]	NA	NA	NA	-	4.01922	3.2006	3.56754	11.2197	123.771	88.5701
MD07G1206400	PREDICTED: cucumisin-like isoform X1 [Malus domestica]	04144(Endocytosis)	K18443	NA	-	2.6128	0.601439	0.114905	11.2816	3.44272	0.744272
MD07G1211200	PREDICTED: uncharacterized protein LOC103942995, partial [Pyrus x bretschneideri]	NA	NA	NA	-	2.32542	5.99235	4.07416	10.3773	61.0628	37.8899
MD07G1214900	PREDICTED: uncharacterized protein LOC103455105 [Malus domestica]	NA	NA	NA	-	1.78737	3.15534	3.0925	4.931	7.50684	6.02786
MD07G1220300	PREDICTED: arginyl-tRNA--protein transferase 2-like [Malus domestica]	NA	NA	NA	-	8.58238	4.87939	4.93038	22.6434	15.3257	10.5327
MD07G1221900	PREDICTED: phosphoinositide phospholipase C 2-like isoform X2 [Malus domestica]	00562(Inositol phosphate metabolism)	K19006	EC:3.1.4.11	K05857,ko04919,Thyroid hormone signaling pathway;K05857,ko04933,AGE-RAGE signaling pathway in diabetic complications;K05857,ko04070,Phosphatidylinositol signaling system;K05857,ko00562,Inositol phosphate metabolism;K05857,ko04020,Calcium signaling pathway	2.23494	2.59461	2.85066	15.4785	11.6739	16.7883
MD07G1230600	PREDICTED: protein NRT1/ PTR FAMILY 5.1 [Malus domestica]	NA	NA	NA	-	4.47791	0.300318	0.951391	153.225	10.3719	11.999
MD07G1248600	ethylene-responsive transcription factor ERF105 [Malus domestica]	00970(Aminoacyl-tRNA biosynthesis)	K01876	EC:6.1.1.12	-	14.4065	16.2149	25.5436	174.907	168.568	120.931
MD07G1248700	ethylene-responsive transcription factor ERF106-like [Malus domestica]	04075(Plant hormone signal transduction)	K14517	NA	-	7.20856	19.468	13.5523	298.782	573.312	277.378
MD07G1251300	PREDICTED: branchpoint-bridging protein-like [Malus domestica]	03013(RNA transport);03015(mRNA surveillance pathway);03018(RNA degradation)	K13126	NA	-	8.00652	10.6664	9.79535	32.1391	24.9484	19.6434
MD07G1253100	PREDICTED: cell number regulator 6-like [Malus domestica]	NA	NA	NA	-	5.01435	5.05972	4.35548	16.0067	12.7336	9.52702
MD07G1256700	PREDICTED: protein EXORDIUM-like 3 [Malus domestica]	NA	NA	NA	-	1.30808	0.0911596	0.132362	7.62528	1.30815	1.48387
MD07G1262500	PREDICTED: calcium-dependent protein kinase 26-like isoform X1 [Malus domestica]	04626(Plant-pathogen interaction)	K13412	EC:2.7.11.1	-	5.15291	4.00528	3.35443	15.6857	15.5899	11.3657
MD07G1264300	PREDICTED: BAG family molecular chaperone regulator 1-like [Malus domestica]	NA	NA	NA	-	5.70224	5.11098	3.88309	18.8252	10.3012	8.66614
MD07G1275200	PREDICTED: putative transporter arsB isoform X1 [Pyrus x bretschneideri]	NA	NA	NA	-	2.66887	1.26337	0.335557	8.08541	2.97891	2.53576
MD07G1275600	PREDICTED: putative transporter arsB isoform X2 [Pyrus x bretschneideri]	NA	NA	NA	-	1.11014	0.177843	0.100421	7.223	2.22373	1.25087
MD07G1278300	PREDICTED: probable receptor-like protein kinase At5g24010 [Malus domestica]	04626(Plant-pathogen interaction)	K13430	EC:2.7.11.1	-	1.03612	0.348663	0.825987	4.19141	2.25913	2.17392
MD07G1283500	PREDICTED: hydroxyproline O-galactosyltransferase HPGT1 isoform X1 [Malus domestica]	NA	NA	NA	-	1.0386	0.239073	0.161993	4.18149	2.4316	2.92587
MD07G1290500	PREDICTED: glutamate synthase [NADH], amyloplastic-like isoform X1 [Malus domestica]	01230(Biosynthesis of amino acids);00910(Nitrogen metabolism);00250(Alanine, aspartate and glutamate metabolism)	K00264	EC:1.4.1.13;EC:1.4.1.14	K00264,ko00910,Nitrogen metabolism;K00264,ko00250,Alanine, aspartate and glutamate metabolism;K00264,ko01230,Biosynthesis of amino acids	3.59165	4.86887	3.79551	15.7317	15.091	8.37292
MD07G1293600	PREDICTED: 50S ribosomal protein L9 [Malus domestica]	03010(Ribosome)	K02939	NA	K02939,ko03010,Ribosome	7.14472	1.7578	2.33352	20.2922	7.8898	5.81342
MD07G1297400	PREDICTED: auxin-responsive protein SAUR32 [Malus domestica]	04075(Plant hormone signal transduction)	K14488	NA	K14488,ko04075,Plant hormone signal transduction	6.10245	1.60688	1.06053	21.2672	4.35803	5.15201
MD07G1299100	PREDICTED: two-component response regulator-like APRR5 [Malus domestica]	04712(Circadian rhythm - plant)	K12130	NA	-	3.38364	0.966069	0.941059	19.8706	5.80942	3.99217
MD07G1305700	PREDICTED: probable gluconokinase [Malus domestica]	01200(Carbon metabolism);00030(Pentose phosphate pathway)	K00851	EC:2.7.1.12	K00851,ko00030,Pentose phosphate pathway;K00851,ko01200,Carbon metabolism	4.73298	2.13805	1.57347	17.5661	7.56524	5.93286
MD07G1311200	PREDICTED: uncharacterized protein LOC103951474 [Pyrus x bretschneideri]	03010(Ribosome)	K02988	NA	K02988,ko03010,Ribosome	3.97164	11.1439	11.2111	11.7822	30.5584	22.2187
MD08G1001200	PREDICTED: WAT1-related protein At4g19185-like [Malus domestica]	01200(Carbon metabolism);01230(Biosynthesis of amino acids);00010(Glycolysis / Gluconeogenesis);00030(Pentose phosphate pathway);00051(Fructose and mannose metabolism);00710(Carbon fixation in photosynthetic organisms)	K01623	EC:4.1.2.13	-	18.341	5.31382	4.09327	48.1384	12.5651	9.70853
MD08G1002700	PREDICTED: uncharacterized protein At1g04910-like [Malus domestica]	00561(Glycerolipid metabolism);00564(Glycerophospholipid metabolism)	K13506	EC:2.3.1.15	-	5.76955	5.35964	4.30934	18.2913	10.9369	9.79193
MD08G1006600	hypothetical protein PRUPE_ppa011153mg [Prunus persica]	00480(Glutathione metabolism)	K00799	EC:2.5.1.18	K00799,ko00982,Drug metabolism - cytochrome P450;K00799,ko01524,Platinum drug resistance;K00799,ko05204,Chemical carcinogenesis;K00799,ko00980,Metabolism of xenobiotics by cytochrome P450;K00799,ko00480,Glutathione metabolism	1.90688	4.57873	2.97928	5.70045	10.0158	8.34997
MD08G1007500	PREDICTED: thioredoxin-like protein CDSP32, chloroplastic [Malus domestica]	NA	NA	NA	-	2.01023	4.30572	0.357928	32.4367	40.7614	12.0676
MD08G1011100	PREDICTED: uncharacterized protein LOC103428593 [Malus domestica]	NA	NA	NA	-	6.5282	0.872604	0.44345	137.262	54.4375	29.5127
MD08G1011900	PREDICTED: thaumatin-like protein 1b [Malus domestica]	NA	NA	NA	-	1.26401	0.208645	0.0504914	7.0047	5.46288	1.63524
MD08G1012800	PREDICTED: tubulin beta chain [Malus domestica]	04145(Phagosome)	K07375	NA	K07375,ko04540,Gap junction;K07375,ko05130,Pathogenic Escherichia coli infection;K07375,ko04145,Phagosome	2.97212	0.577384	0.586843	79.854	64.4961	29.4137
MD08G1013300	PREDICTED: uncharacterized protein LOC103927813 isoform X2 [Pyrus x bretschneideri]	NA	NA	NA	-	0.560581	0.195957	0.367511	1.71704	0.585832	0.627607
MD08G1032600	PREDICTED: arabinosyltransferase RRA3-like [Malus domestica]	NA	NA	NA	-	0.968306	0.415064	0.37087	4.05465	1.20571	1.03943
MD08G1032800	PREDICTED: cytochrome P450 734A1-like [Malus domestica]	00905(Brassinosteroid biosynthesis)	K15639	EC:1.14.-.-	-	0.791407	0.395838	0.0884227	4.87636	3.34609	1.37678
MD08G1033000	PREDICTED: cytochrome P450 734A1-like [Malus domestica]	00905(Brassinosteroid biosynthesis)	K15639	EC:1.14.-.-	-	3.30387	1.55406	1.75794	8.86478	9.59455	7.79484
MD08G1033100	PREDICTED: protein indeterminate-domain 2-like [Pyrus x bretschneideri]	00052(Galactose metabolism);00600(Sphingolipid metabolism);00531(Glycosaminoglycan degradation);00604(Glycosphingolipid biosynthesis - ganglio series);00511(Other glycan degradation)	K12309	EC:3.2.1.23	-	6.73515	0.902435	0.905659	24.7938	18.0518	10.8371
MD08G1036500	PREDICTED: probable 1-acyl-sn-glycerol-3-phosphate acyltransferase 4 isoform X1 [Malus domestica]	00561(Glycerolipid metabolism);00564(Glycerophospholipid metabolism)	K13513	EC:2.3.1.-;EC:2.3.1.51	-	0.762443	0.858258	0.643855	3.24273	3.47875	1.74631
MD08G1037600	PREDICTED: protein DETOXIFICATION 33-like [Malus domestica]	NA	NA	NA	-	9.52832	6.47184	3.42303	28.9791	17.3291	19.0651
MD08G1037800	-	NA	NA	NA	-	15.4566	4.50504	3.80651	42.3834	11.9375	8.68789
MD08G1052300	PREDICTED: VQ motif-containing protein 11-like [Malus domestica]	NA	NA	NA	-	2.61616	6.77227	6.80456	11.7941	29.83	42.282
MD08G1059500	PREDICTED: uncharacterized protein LOC103440754 [Malus domestica]	NA	NA	NA	-	1.22383	0.994568	1.07275	5.05515	2.51104	1.8502
MD08G1065200	PREDICTED: uncharacterized protein LOC103410594 [Malus domestica]	NA	NA	NA	-	16.4798	12.9179	13.5402	46.7715	73.4335	50.1837
MD08G1088100	PREDICTED: protein arginine N-methyltransferase 2 [Malus domestica]	NA	NA	NA	-	3.68565	3.85843	3.10067	15.1666	11.1801	9.21686
MD08G1091700	PREDICTED: uncharacterized protein LOC103441251 [Malus domestica]	04075(Plant hormone signal transduction)	K14495	NA	K14495,ko04075,Plant hormone signal transduction	19.8617	52.2553	58.1042	86.8135	262.733	282.717
MD08G1092900	PREDICTED: cyclin-D3-1-like [Pyrus x bretschneideri]	04075(Plant hormone signal transduction)	K14505	NA	K14505,ko04075,Plant hormone signal transduction	3.71502	0.629389	0.925883	15.9855	4.2532	4.70311
MD08G1096700	PREDICTED: LOW QUALITY PROTEIN: NAC domain-containing protein 72-like [Malus domestica]	03013(RNA transport);03015(mRNA surveillance pathway);03018(RNA degradation)	K13126	NA	-	0.721865	0.633352	0.595044	3.37537	3.88308	3.60496
MD08G1097700	PREDICTED: calnexin homolog 1-like [Malus domestica]	04141(Protein processing in endoplasmic reticulum);04145(Phagosome)	K08054	NA	K08054,ko04612,Antigen processing and presentation;K08054,ko04141,Protein processing in endoplasmic reticulum;K08054,ko04145,Phagosome;K08054,ko04918,Thyroid hormone synthesis;K08054,ko05166,HTLV-I infection	9.16637	15.6521	15.6477	31.487	71.2335	67.1257
MD08G1098900	PREDICTED: uncharacterized protein LOC103441113 isoform X2 [Malus domestica]	NA	NA	NA	-	1.90543	1.47293	2.25323	8.87694	6.03904	4.24969
MD08G1101700	PREDICTED: alpha-amylase-like [Pyrus x bretschneideri]	00500(Starch and sucrose metabolism)	K01176	EC:3.2.1.1	K01176,ko04973,Carbohydrate digestion and absorption;K01176,ko00500,Starch and sucrose metabolism	2.11448	0.485223	0.40259	8.49161	1.47898	0.658193
MD08G1103200	PREDICTED: uncharacterized protein LOC103441128 [Malus domestica]	00900(Terpenoid backbone biosynthesis);00909(Sesquiterpenoid and triterpenoid biosynthesis)	K15891	EC:1.1.1.216	-	14.7611	9.46601	8.69765	49.5877	30.1987	23.2435
MD08G1106300	PREDICTED: polyadenylate-binding protein RBP47-like isoform X1 [Pyrus x bretschneideri]	03013(RNA transport)	K03231	NA	-	6.36423	2.56894	2.6691	23.6024	13.4074	11.0731
MD08G1108600	PREDICTED: RNA polymerase sigma factor sigC-like [Malus domestica]	00970(Aminoacyl-tRNA biosynthesis)	K01872	EC:6.1.1.7	-	1.06847	1.40535	0.660174	3.62628	4.30811	3.33918
MD08G1110000	PREDICTED: early nodulin-93-like [Malus domestica]	NA	NA	NA	-	28.9046	8.23519	7.42475	94.4594	25.418	24.2505
MD08G1117500	PREDICTED: aspartate aminotransferase, cytoplasmic [Malus domestica]	01200(Carbon metabolism);01210(2-Oxocarboxylic acid metabolism);01230(Biosynthesis of amino acids);00710(Carbon fixation in photosynthetic organisms);00250(Alanine, aspartate and glutamate metabolism);00270(Cysteine and methionine metabolism);00220(Arginine biosynthesis);00330(Arginine and proline metabolism);00350(Tyrosine metabolism);00360(Phenylalanine metabolism);00400(Phenylalanine, tyrosine…	K14454	EC:2.6.1.1	K14454,ko00960,Tropane, piperidine and pyridine alkaloid biosynthesis;K14454,ko00330,Arginine and proline metabolism;K14454,ko00710,Carbon fixation in photosynthetic organisms;K14454,ko01210,2-Oxocarboxylic acid metabolism;K14454,ko00270,Cysteine and methionine metabolism;K14454,ko00220,Arginine biosynthesis;K14454,ko01230,Biosynthesis of amino acids;K14454,ko00350,Tyrosine metabolism;K14454,ko00…	37.5006	9.55356	10.8829	211.039	70.6725	58.6382
MD08G1121300	PREDICTED: NAC domain-containing protein 100-like isoform X2 [Malus domestica]	03018(RNA degradation)	K12581	NA	-	1.51145	0.475028	0.376216	4.27431	1.82648	0.878677
MD08G1134000	PREDICTED: zeatin O-glucosyltransferase-like isoform X3 [Pyrus x bretschneideri]	00908(Zeatin biosynthesis)	K13495	EC:2.4.1.215	-	3.03887	1.21379	2.18878	31.737	12.0063	9.01137
MD08G1135100	PREDICTED: E3 ubiquitin-protein ligase MIEL1-like [Pyrus x bretschneideri]	04120(Ubiquitin mediated proteolysis)	K10144	EC:2.3.2.27	K10144,ko04120,Ubiquitin mediated proteolysis;K10144,ko04115,p53 signaling pathway;K10144,ko05162,Measles	6.12981	2.39646	2.48888	76.311	16.5725	15.4636
MD08G1135400	PREDICTED: molybdate transporter 1 [Malus domestica]	NA	NA	NA	-	0.678332	0.996918	0.868501	2.18345	2.13561	1.70471
MD08G1150700	PREDICTED: putative clathrin assembly protein At2g25430 [Pyrus x bretschneideri]	NA	NA	NA	-	12.0011	29.8173	31.0099	39.0827	100.703	77.2861
MD08G1155600	-	NA	NA	NA	-	5.29021	7.52356	4.55168	16.4907	13.8183	10.4632
MD08G1156300	PREDICTED: protein FAR1-RELATED SEQUENCE 6-like [Malus domestica]	NA	NA	NA	-	2.29906	4.18659	3.25346	6.94085	15.8397	8.67403
MD08G1162000	PREDICTED: BTB/POZ domain-containing protein At1g21780 [Malus domestica]	NA	NA	NA	K10523,ko04341,Hedgehog signaling pathway - fly;K10523,ko04340,Hedgehog signaling pathway	3.97306	0.633178	0.89063	16.2221	3.91542	4.81336
MD08G1162900	PREDICTED: protein PLASTID MOVEMENT IMPAIRED 1 [Malus domestica]	NA	NA	NA	-	4.46501	31.357	20.0984	15.9913	85.8768	46.4399
MD08G1168100	PREDICTED: uncharacterized protein LOC103448108 [Malus domestica]	NA	NA	NA	-	1.63293	0.753105	0.241585	4.41069	4.29904	1.99562
MD08G1168600	flavonol synthase [Malus domestica]	00941(Flavonoid biosynthesis)	K05278	EC:1.14.11.23	-	2.33479	0.339798	0.411149	11.9992	0.955265	1.04135
MD08G1176200	PREDICTED: early endosome antigen 1 [Pyrus x bretschneideri]	03420(Nucleotide excision repair)	K10841	NA	-	2.17652	2.13869	2.27836	9.33928	4.76976	5.66901
MD08G1180900	PREDICTED: VID27-like protein [Malus domestica]	NA	NA	NA	-	3.38146	16.3347	17.2081	9.02933	64.8158	99.5317
MD08G1181100	PREDICTED: endochitinase A-like [Malus domestica]	NA	NA	NA	-	2.26	0.707686	0.479521	8.12146	5.36274	4.11715
MD08G1186500	PREDICTED: F-box protein FBW2 [Malus domestica]	NA	NA	NA	-	10.3472	11.1367	10.6902	49.8753	46.6996	40.3637
MD08G1187200	serine/threonine-protein kinase SAPK2 [Malus domestica]	04075(Plant hormone signal transduction)	K14498	EC:2.7.11.1	-	3.55634	5.08723	3.03973	19.9222	34.7855	25.1416
MD08G1196300	PREDICTED: AT-hook motif nuclear-localized protein 28-like [Malus domestica]	NA	NA	NA	-	6.37754	8.70038	4.12227	26.8242	76.8014	40.1401
MD08G1196900	dormancy-associated MADS box 2 protein [Malus domestica]	03060(Protein export)	K03217	NA	-	15.2926	22.4461	16.6194	40.8126	63.8369	53.4748
MD08G1200700	glycosyltransferase, partial [Arabidopsis thaliana]	00942(Anthocyanin biosynthesis)	K12937	EC:2.4.1.254	-	0.467131	0.282303	0.365979	2.61923	3.47996	2.09703
MD08G1207300	auxin-responsive protein IAA8-like [Malus domestica]	04075(Plant hormone signal transduction)	K14484	NA	K14484,ko04075,Plant hormone signal transduction	18.8296	16.4323	17.3699	57.0984	46.5345	47.1088
MD08G1209900	PREDICTED: sucrose transport protein SUC4-like [Malus domestica]	03010(Ribosome)	K02941	NA	-	1.08596	1.16323	0.824854	2.92784	2.52328	2.45858
MD08G1211500	PREDICTED: inositol-tetrakisphosphate 1-kinase 3 [Malus domestica]	00562(Inositol phosphate metabolism);04070(Phosphatidylinositol signaling system)	K00913	EC:2.7.1.159;EC:2.7.1.134	K00913,ko00562,Inositol phosphate metabolism;K00913,ko04070,Phosphatidylinositol signaling system	1.58578	0.451209	0.288264	5.84468	1.21319	1.32204
MD08G1211700	PREDICTED: uncharacterized protein LOC103928190 [Pyrus x bretschneideri]	03040(Spliceosome)	K12662	NA	-	5.38402	8.1241	9.02048	15.1786	37.3326	29.3006
MD08G1217800	PREDICTED: carboxymethylenebutenolidase homolog [Malus domestica]	NA	NA	NA	-	1.69878	0.666889	0.795395	28.1535	30.9043	18.3293
MD08G1218000	PREDICTED: patellin-3-like [Malus domestica]	NA	NA	NA	-	14.8668	12.5851	11.2486	42.3825	49.5794	40.019
MD08G1218200	PREDICTED: patellin-3-like [Malus domestica]	NA	NA	NA	-	13.1194	8.12486	4.18437	517.708	713.355	416.209
MD08G1220900	PREDICTED: chlorophyll a-b binding protein CP24 10A, chloroplastic [Malus domestica]	00196(Photosynthesis - antenna proteins)	K08917	NA	K08917,ko00196,Photosynthesis - antenna proteins	2.75278	1.71114	0.760888	22.8233	6.41337	2.94008
MD08G1222200	PREDICTED: dynamin-like protein ARC5 [Malus domestica]	NA	NA	NA	-	1.46184	1.60072	1.13886	4.25212	3.3287	4.18826
MD08G1231400	PREDICTED: vestitone reductase-like isoform X1 [Pyrus x bretschneideri]	00943(Isoflavonoid biosynthesis)	K13265	EC:1.1.1.348	-	26.4419	40.3525	25.279	85.171	78.5203	79.3949
MD08G1234400	PREDICTED: collagen alpha-1(XVIII) chain-like [Malus domestica]	NA	NA	NA	-	0.869456	4.45927	2.99698	12.7158	13.0383	9.72213
MD08G1236800	PREDICTED: ferredoxin, leaf L-A-like [Pyrus x bretschneideri]	00195(Photosynthesis)	K02639	NA	-	21.5851	24.6432	9.66235	137.014	117.001	66.8133
MD08G1240000	PREDICTED: transcription factor TCP8-like [Malus domestica]	04712(Circadian rhythm - plant)	K16221	NA	-	1.15141	1.28822	0.666785	3.19934	2.93686	2.26519
MD08G1243000	PREDICTED: cytochrome P450 98A2-like [Malus domestica]	00940(Phenylpropanoid biosynthesis);00945(Stilbenoid, diarylheptanoid and gingerol biosynthesis);00941(Flavonoid biosynthesis)	K09754	EC:1.14.13.36	-	0.589221	0.656614	0.244458	15.0078	2.1617	4.17173
MD08G1250800	PREDICTED: ferric reduction oxidase 6-like [Malus domestica]	04626(Plant-pathogen interaction)	K13447	EC:1.6.3.-;EC:1.11.1.-	-	5.21361	3.26883	2.81956	16.997	8.89761	9.69742
MD09G1000800	PREDICTED: glyceraldehyde-3-phosphate dehydrogenase A, chloroplastic [Malus domestica]	01200(Carbon metabolism);00710(Carbon fixation in photosynthetic organisms)	K05298	EC:1.2.1.13	K05298,ko00710,Carbon fixation in photosynthetic organisms;K05298,ko01200,Carbon metabolism	46.5966	20.6131	10.3603	125.576	42.4301	24.6385
MD09G1014300	PREDICTED: probable adenylate kinase 7, mitochondrial [Malus domestica]	00230(Purine metabolism)	K00939	EC:2.7.4.3	-	5.1992	22.1044	20.7864	17.3619	85.468	73.6788
MD09G1014400	PREDICTED: uncharacterized protein LOC103442151 isoform X1 [Malus domestica]	NA	NA	NA	-	0.950985	0.220164	0.16623	3.63841	2.21489	1.53704
MD09G1016600	PREDICTED: lysine histidine transporter 1-like [Malus domestica]	NA	NA	NA	-	15.2164	2.51865	1.48333	144.33	24.3023	8.39014
MD09G1021000	PREDICTED: pre-rRNA-processing protein esf2 [Malus domestica]	NA	NA	NA	-	3.91779	5.04821	6.05609	15.4674	33.1988	20.6825
MD09G1024200	PREDICTED: TMV resistance protein N-like [Pyrus x bretschneideri]	03040(Spliceosome);04141(Protein processing in endoplasmic reticulum);04144(Endocytosis)	K03283	NA	-	1.56037	2.59779	2.51462	7.99949	6.56119	4.16166
MD09G1027400	PREDICTED: titin homolog isoform X2 [Pyrus x bretschneideri]	NA	NA	NA	-	52.7755	284.806	245.336	153.672	709.333	655.02
MD09G1030800	PREDICTED: monodehydroascorbate reductase 4, peroxisomal-like isoform X1 [Malus domestica]	00053(Ascorbate and aldarate metabolism)	K08232	EC:1.6.5.4	K08232,ko00053,Ascorbate and aldarate metabolism	11.2011	25.412	22.6726	37.7737	100.119	81.1987
MD09G1045800	PREDICTED: thioredoxin H2-like [Pyrus x bretschneideri]	NA	NA	NA	-	14.745	50.9653	52.4543	106.452	366.082	258.865
MD09G1059100	PREDICTED: uncharacterized protein LOC103442825 [Malus domestica]	NA	NA	NA	-	1.2896	1.05334	1.29576	5.26792	3.62419	3.14871
MD09G1074100	truncated transcription factor CAULIFLOWER A [Malus domestica]	NA	NA	NA	-	1.45529	0.830732	0.524436	4.45658	2.72794	2.09042
MD09G1080400	PREDICTED: phenolic glucoside malonyltransferase 2-like [Malus domestica]	00944(Flavone and flavonol biosynthesis);00943(Isoflavonoid biosynthesis)	K13264	EC:2.3.1.115	-	2.71666	6.80888	5.07881	9.16438	11.3042	13.8917
MD09G1096400	PREDICTED: uncharacterized protein LOC103421553 [Malus domestica]	NA	NA	NA	-	4.62248	10.2349	10.5717	12.5451	40.8657	41.9134
MD09G1096900	PREDICTED: uncharacterized protein LOC103442553 [Malus domestica]	NA	NA	NA	-	3.60077	3.04107	2.14088	10.693	84.9127	73.0023
MD09G1098300	PREDICTED: cytochrome b6-f complex iron-sulfur subunit, chloroplastic-like [Malus domestica]	00195(Photosynthesis)	K02636	EC:1.10.9.1	-	21.4349	3.20096	1.30216	118.812	7.08602	4.39193
MD09G1103400	PREDICTED: mediator-associated protein 1-like [Malus domestica]	NA	NA	NA	-	38.6017	152.003	142.744	110.434	444.687	464.236
MD09G1103800	PREDICTED: LOW QUALITY PROTEIN: beta-amylase-like [Malus domestica]	00500(Starch and sucrose metabolism)	K01177	EC:3.2.1.2	-	2.73508	1.44121	3.05436	20.9688	24.4748	25.329
MD09G1119100	PREDICTED: fasciclin-like arabinogalactan protein 7 [Malus domestica]	NA	NA	NA	-	0.97025	0.0444497	0.12908	44.5934	2.83679	3.81868
MD09G1122100	PREDICTED: OBERON-like protein [Malus domestica]	NA	NA	NA	-	24.5943	47.1253	44.4898	64.8833	171.81	115.047
MD09G1124200	PREDICTED: LOW QUALITY PROTEIN: 60S acidic ribosomal protein P2B-like [Malus domestica]	03010(Ribosome)	K02943	NA	-	4.92081	8.0437	6.76743	14.2471	29.5525	19.9527
MD09G1127000	PREDICTED: fasciclin-like arabinogalactan protein 2 [Malus domestica]	03015(mRNA surveillance pathway)	K03456	NA	-	9.46057	2.49185	3.5907	40.8881	13.4593	42.6955
MD09G1130400	PREDICTED: F-box/kelch-repeat protein At3g06240-like [Malus domestica]	00970(Aminoacyl-tRNA biosynthesis)	K01889	EC:6.1.1.20	-	0.824219	2.20946	2.14641	2.60748	6.41081	4.91606
MD09G1134000	PREDICTED: DNA ligase 1-like [Malus domestica]	NA	NA	NA	-	2.59319	20.8853	18.2552	11.5364	106.546	70.184
MD09G1140700	uDP-glycosyltransferase 71A15 [Malus domestica]	00942(Anthocyanin biosynthesis)	K12938	EC:2.4.1.-	-	4.9697	6.72682	22.6435	16.0327	51.3419	42.6578
MD09G1141100	uDP-glycosyltransferase 71A15 [Malus domestica]	00942(Anthocyanin biosynthesis)	K12938	EC:2.4.1.-	-	25.3712	13.6834	36.1264	75.9982	132.946	106.455
MD09G1141500	PREDICTED: UDP-glycosyltransferase 71A15-like [Malus domestica]	00942(Anthocyanin biosynthesis)	K12938	EC:2.4.1.-	-	5.50479	2.52243	4.04088	19.8828	12.3439	9.42595
MD09G1150200	PREDICTED: callose synthase 7-like [Malus domestica]	00500(Starch and sucrose metabolism)	K00706	EC:2.4.1.34	-	0.74896	0.229417	0.225338	4.32627	2.99657	2.16008
MD09G1156900	PREDICTED: probable LRR receptor-like serine/threonine-protein kinase At1g07650 [Malus domestica]	00520(Amino sugar and nucleotide sugar metabolism)	K01183	EC:3.2.1.14	-	1.21725	0.202612	0.257414	13.9097	0.930908	0.4886
MD09G1159500	PREDICTED: uncharacterized protein At1g04910-like [Malus domestica]	NA	NA	NA	-	3.69487	5.99174	8.72271	10.1751	16.6168	28.1872
MD09G1163400	PREDICTED: uncharacterized membrane protein At1g16860-like [Malus domestica]	NA	NA	NA	-	2.90838	1.33942	1.24137	12.2484	3.36849	4.94813
MD09G1168600	PREDICTED: uncharacterized protein LOC103443388 [Malus domestica]	NA	NA	NA	-	34.1157	15.0847	13.7905	116.408	39.7644	23.8524
MD09G1172000	PREDICTED: uncharacterized protein LOC103425518 isoform X1 [Malus domestica]	NA	NA	NA	-	1.91366	5.01504	4.10047	6.30248	12.7975	9.46326
MD09G1173000	PREDICTED: alanine aminotransferase 2 [Malus domestica]	01200(Carbon metabolism);01210(2-Oxocarboxylic acid metabolism);01230(Biosynthesis of amino acids);00710(Carbon fixation in photosynthetic organisms);00250(Alanine, aspartate and glutamate metabolism);00220(Arginine biosynthesis)	K00814	EC:2.6.1.2	K00814,ko01200,Carbon metabolism;K00814,ko01230,Biosynthesis of amino acids;K00814,ko01210,2-Oxocarboxylic acid metabolism;K00814,ko00250,Alanine, aspartate and glutamate metabolism;K00814,ko00220,Arginine biosynthesis;K00814,ko00710,Carbon fixation in photosynthetic organisms	27.0922	11.9665	14.1275	120.868	88.9377	63.1919
MD09G1189600	PREDICTED: uncharacterized protein LOC103453586 [Malus domestica]	NA	NA	NA	-	97.3653	434.563	356.28	623.565	1935.05	1372.15
MD09G1192300	PREDICTED: protein indeterminate-domain 7-like isoform X1 [Malus domestica]	00052(Galactose metabolism);00600(Sphingolipid metabolism);00531(Glycosaminoglycan degradation);00604(Glycosphingolipid biosynthesis - ganglio series);00511(Other glycan degradation)	K12309	EC:3.2.1.23	-	2.05662	0.261337	0.379455	8.33898	1.57903	1.97245
MD09G1193000	PREDICTED: protein YLS9 [Malus domestica]	00970(Aminoacyl-tRNA biosynthesis)	K01868	EC:6.1.1.3	-	3.42395	2.26606	0.963367	15.9811	21.5554	14.7877
MD09G1202300	auxin-responsive protein IAA26-like [Malus domestica]	04075(Plant hormone signal transduction)	K14484	NA	K14484,ko04075,Plant hormone signal transduction	0.64264	0.343968	0.124859	5.41872	1.74058	3.04835
MD09G1207300	PREDICTED: photosynthetic NDH subunit of subcomplex B 3, chloroplastic-like [Malus domestica]	NA	NA	NA	-	1.41963	1.20352	0.735783	6.93621	8.37219	3.86656
MD09G1236300	PREDICTED: shaggy-related protein kinase eta isoform X3 [Malus domestica]	04075(Plant hormone signal transduction)	K14502	EC:2.7.11.1	-	65.7241	18.4492	19.1828	177.006	54.898	46.206
MD09G1236800	PREDICTED: F-box/LRR-repeat MAX2 homolog A [Malus domestica]	04145(Phagosome)	K07374	NA	-	6.8646	19.0371	16.2333	28.7841	132.088	78.6942
MD09G1251400	PREDICTED: disease resistance protein RML1A-like [Malus domestica]	03013(RNA transport)	K14309	NA	-	6.04974	7.06559	5.47151	32.3667	34.6274	23.5703
MD09G1265200	PREDICTED: uncharacterized protein LOC103959464 [Pyrus x bretschneideri]	NA	NA	NA	-	7.75084	0.715035	0.769048	33.3798	2.64021	1.70037
MD09G1276200	PREDICTED: universal stress protein PHOS32-like [Pyrus x bretschneideri]	NA	NA	NA	-	10.512	22.1391	18.5472	236.767	232.251	338.74
MD09G1277500	PREDICTED: homeobox-leucine zipper protein HDG11-like [Malus domestica]	NA	NA	NA	-	2.70304	1.27412	1.09953	8.33006	3.06848	2.84792
MD09G1282000	PREDICTED: psbQ-like protein 3, chloroplastic [Malus domestica]	NA	NA	NA	-	1.40849	1.6375	1.55934	9.1737	10.8416	4.11551
MD09G1284900	PREDICTED: uncharacterized protein LOC103420953 [Malus domestica]	NA	NA	NA	-	1.43579	0.708148	0.572529	5.26893	2.09074	1.35355
MD09G1285400	PREDICTED: probable WRKY transcription factor 23 [Malus domestica]	04626(Plant-pathogen interaction)	K18834	NA	-	27.614	18.0005	27.1628	75.9384	66.438	37.9396
MD10G1011000	PREDICTED: scarecrow-like protein 1 [Malus domestica]	04075(Plant hormone signal transduction)	K14494	NA	-	18.7743	9.51094	7.96503	49.1211	35.8317	18.1499
MD10G1013800	PREDICTED: alcohol dehydrogenase [Malus domestica]	00010(Glycolysis / Gluconeogenesis);00071(Fatty acid degradation);00350(Tyrosine metabolism)	K00001	EC:1.1.1.1	K18857,ko00592,alpha-Linolenic acid metabolism;K18857,ko00010,Glycolysis / Gluconeogenesis;K18857,ko00350,Tyrosine metabolism;K18857,ko00071,Fatty acid degradation	9.28556	2.60837	1.52066	108.197	93.352	31.3612
MD10G1014500	PREDICTED: alcohol dehydrogenase 1 [Malus domestica]ADH1	00010(Glycolysis / Gluconeogenesis);00071(Fatty acid degradation);00592(alpha-Linolenic acid metabolism);00350(Tyrosine metabolism)	K18857	EC:1.1.1.1	-	0.962522	0.134155	0.146093	365.858	28.2565	30.2691
MD10G1014800	PREDICTED: stearoyl-[acyl-carrier-protein] 9-desaturase 6, chloroplastic-like [Malus domestica]硬脂酰- acp转化为油酰- acpN/A	01212(Fatty acid metabolism);00061(Fatty acid biosynthesis);01040(Biosynthesis of unsaturated fatty acids)	K03921	EC:1.14.19.2;EC:1.14.19.11	-	2.52099	0.811682	1.34223	1999.6	1441.49	820.916
MD10G1022200	PREDICTED: carbonic anhydrase 2-like isoform X1 [Pyrus x bretschneideri]	00910(Nitrogen metabolism)	K01673	EC:4.2.1.1	K01673,ko00910,Nitrogen metabolism	4.1888	0.0983584	0.142814	12.3974	1.54145	1.80118
MD10G1024300	PREDICTED: protein FAM188A [Malus domestica]	NA	NA	NA	-	15.963	23.3476	23.2714	88.2038	188.95	109.525
MD10G1032000	ethylene-responsive transcription factor ABR1-like [Malus domestica]	04075(Plant hormone signal transduction)	K14517	NA	-	1.86358	1.09786	1.06271	7.78767	4.34168	1.69606
MD10G1039000	PREDICTED: TMV resistance protein N-like [Malus domestica]	03040(Spliceosome);04141(Protein processing in endoplasmic reticulum);04144(Endocytosis)	K03283	NA	-	1.7768	1.88271	2.29713	13.3233	8.20415	4.64418
MD10G1039500	PREDICTED: protein SUPPRESSOR OF npr1-1, CONSTITUTIVE 1-like [Pyrus x bretschneideri]	04626(Plant-pathogen interaction)	K12795	NA	-	2.20687	2.94993	2.55804	8.37285	6.62208	4.69313
MD10G1041100	flowering locus C-like protein [Pyrus pyrifolia var. culta]	03060(Protein export)	K03217	NA	-	1.42477	1.01009	0.768235	10.135	25.1269	13.8756
MD10G1045400	PREDICTED: uncharacterized protein LOC103964094 isoform X1 [Pyrus x bretschneideri]	03040(Spliceosome);03013(RNA transport);03015(mRNA surveillance pathway)	K12812	EC:3.6.4.13	-	0.6959	0.748367	0.70177	2.99272	4.42754	3.78798
MD10G1052800	PREDICTED: protein DMR6-LIKE OXYGENASE 2-like [Malus domestica]	00941(Flavonoid biosynthesis)	K05278	EC:1.14.11.23	-	4.08279	0.693311	0.134223	30.907	5.81236	9.07021
MD10G1053000	PREDICTED: protein DMR6-LIKE OXYGENASE 2-like [Malus domestica]	00941(Flavonoid biosynthesis)	K05278	EC:1.14.11.23	-	5.20241	0.13695	0.0795395	36.9178	2.64792	5.27586
MD10G1053200	PREDICTED: protein DMR6-LIKE OXYGENASE 2-like [Malus domestica]	00941(Flavonoid biosynthesis)	K05278	EC:1.14.11.23	-	3.80406	0.206141	0.209519	28.0576	1.02757	2.79625
MD10G1056900	PREDICTED: DNA polymerase V-like [Malus domestica]	NA	NA	NA	-	4.75494	3.24874	2.88479	14.1496	8.70977	8.20582
MD10G1061800	PREDICTED: protein RTF1 homolog [Malus domestica]	NA	NA	NA	-	21.0584	58.0552	51.8845	72.4026	206.837	135.757
MD10G1063600	PREDICTED: fructose-bisphosphate aldolase 1, chloroplastic [Malus domestica]	01200(Carbon metabolism);01230(Biosynthesis of amino acids);00010(Glycolysis / Gluconeogenesis);00030(Pentose phosphate pathway);00051(Fructose and mannose metabolism);00710(Carbon fixation in photosynthetic organisms)	K01623	EC:4.1.2.13	K01623,ko01230,Biosynthesis of amino acids;K01623,ko00680,Methane metabolism;K01623,ko00710,Carbon fixation in photosynthetic organisms;K01623,ko00010,Glycolysis / Gluconeogenesis;K01623,ko00051,Fructose and mannose metabolism;K01623,ko01200,Carbon metabolism;K01623,ko00030,Pentose phosphate pathway	9.90293	4.75929	2.14059	76.8667	38.3659	24.1714
MD10G1064900	squalene synthase-like [Malus domestica]	00100(Steroid biosynthesis);00909(Sesquiterpenoid and triterpenoid biosynthesis)	K00801	EC:2.5.1.21	K00801,ko00100,Steroid biosynthesis;K00801,ko00909,Sesquiterpenoid and triterpenoid biosynthesis	15.8278	1.64067	1.67946	98.8932	6.33203	3.9466
MD10G1073000	PREDICTED: putative rRNA methyltransferase [Malus domestica]	NA	NA	NA	-	21.5368	43.8197	43.3013	57.3932	153.882	118.917
MD10G1078500	PREDICTED: adenylate kinase isoenzyme 6 homolog [Malus domestica]	00230(Purine metabolism);03008(Ribosome biogenesis in eukaryotes)	K18532	EC:2.7.4.3	K18532,ko00230,Purine metabolism;K18532,ko03008,Ribosome biogenesis in eukaryotes	10.9125	4.9374	4.35148	30.8161	17.2123	12.1276
MD10G1083800	PREDICTED: plastid division protein PDV2-like [Malus domestica]	NA	NA	NA	-	7.16532	10.375	10.6307	25.5682	66.2538	40.1981
MD10G1086700	PREDICTED: uncharacterized protein LOC103431760 [Malus domestica]	NA	NA	NA	-	40.0405	9.15611	5.81052	125.8	26.0412	24.0294
MD10G1120300	PREDICTED: putative amidase C869.01 isoform X1 [Malus domestica]	00330(Arginine and proline metabolism);00360(Phenylalanine metabolism);00380(Tryptophan metabolism)	K01426	EC:3.5.1.4	-	1.88264	0.517708	0.386291	6.29061	4.76813	4.09651
MD10G1120800	PREDICTED: translocase of chloroplast 120, chloroplastic-like [Malus domestica]	NA	NA	NA	-	21.5387	26.834	27.1456	61.6536	105.007	68.7022
MD10G1122400	PREDICTED: protein NUCLEAR FUSION DEFECTIVE 4-like [Malus domestica]	NA	NA	NA	-	1.17515	4.62578	4.4863	8.72675	43.4384	36.0718
MD10G1126500	PREDICTED: RNA-binding protein 39-like [Malus domestica]	03013(RNA transport);03015(mRNA surveillance pathway);03018(RNA degradation)	K13126	NA	-	17.089	53.435	46.6692	48.1892	175.028	132.048
MD10G1143400	PREDICTED: 3-hydroxy-3-methylglutaryl-coenzyme A reductase 1-like [Malus domestica]	00900(Terpenoid backbone biosynthesis)	K00021	EC:1.1.1.34	-	28.4661	7.92709	10.684	166.922	125.383	74.0457
MD10G1151400	PREDICTED: uncharacterized protein LOC103429558 [Malus domestica]	NA	NA	NA	-	1.03532	1.5097	2.28735	26.094	12.7903	13.9888
MD10G1156700	PREDICTED: UV-B-induced protein At3g17800, chloroplastic-like [Malus domestica]	NA	NA	NA	-	3.88894	0.753946	0.853231	16.1101	9.81431	4.99322
MD10G1160300	PREDICTED: oleoyl-acyl carrier protein thioesterase 1, chloroplastic-like isoform X1 [Malus domestica]	00061(Fatty acid biosynthesis)	K10782	EC:3.1.2.14	-	2.36411	3.28513	2.84446	9.28695	9.16207	5.62817
MD10G1165800	PREDICTED: guanine nucleotide-binding protein-like NSN1 [Malus domestica]	03008(Ribosome biogenesis in eukaryotes)	K14538	NA	-	19.6032	24.537	26.4818	63.6773	122.044	81.8297
MD10G1171000	hypothetical protein PRUPE_ppa003067mg [Prunus persica]	NA	NA	NA	-	4.96587	1.31417	1.36811	17.4877	9.10152	5.47125
MD10G1177700	PREDICTED: uncharacterized endoplasmic reticulum membrane protein C16E8.02-like [Pyrus x bretschneideri]	NA	NA	NA	-	1.51196	0.395296	0.23915	4.79498	1.66693	1.31073
MD10G1184700	PREDICTED: probable inorganic phosphate transporter 1-7 [Pyrus x bretschneideri]	NA	NA	NA	-	6.52529	0.867536	0.395182	34.1418	7.22029	6.52234
MD10G1191200	PREDICTED: histone H1 [Malus domestica]	NA	NA	NA	-	13.5452	5.16995	6.32617	90.1129	39.0627	29.7294
MD10G1191900	PREDICTED: magnesium transporter MRS2-I-like [Malus domestica]	NA	NA	NA	-	1.88342	0.734939	0.88522	6.56663	1.94276	2.23553
MD10G1203200	PREDICTED: elongation factor 2 [Malus domestica]	03040(Spliceosome)	K12852	NA	K03234,ko04921,Oxytocin signaling pathway;K03234,ko04152,AMPK signaling pathway	14.8798	11.421	11.8089	38.818	30.9512	37.0889
MD10G1210600	PREDICTED: phosphoglycerate kinase, cytosolic [Malus domestica]	01200(Carbon metabolism);01230(Biosynthesis of amino acids);00010(Glycolysis / Gluconeogenesis);00710(Carbon fixation in photosynthetic organisms)	K00927	EC:2.7.2.3	-	158.375	37.6003	39.4113	543.751	140.12	105.949
MD10G1213800	PREDICTED: inosine-5'-monophosphate dehydrogenase 2-like [Malus domestica]	00230(Purine metabolism)	K00088	EC:1.1.1.205	K00088,ko00230,Purine metabolism;K00088,ko00983,Drug metabolism - other enzymes	40.0516	37.902	38.2651	127.203	132.573	120.188
MD10G1226900	PREDICTED: haloacid dehalogenase-like hydrolase domain-containing protein 3 [Malus domestica]	NA	NA	NA	-	7.36883	1.22153	1.35978	20.736	5.39709	4.03196
MD10G1252200	PREDICTED: small RNA 2'-O-methyltransferase-like [Malus domestica]	NA	NA	NA	-	0.939989	0.0757766	0.0412597	3.30184	0.729703	0.419722
MD10G1252900	PREDICTED: 2-succinylbenzoate--CoA ligase, chloroplastic/peroxisomal [Malus domestica]	00130(Ubiquinone and other terpenoid-quinone biosynthesis)	K14760	EC:6.2.1.26	-	1.21355	1.75383	1.46425	3.489	5.01145	2.8284
MD10G1254200	PREDICTED: 187-kDa microtubule-associated protein AIR9-like [Malus domestica]	NA	NA	NA	-	1.99722	2.61262	3.7896	7.00718	7.29692	10.2268
MD10G1254300	PREDICTED: cationic amino acid transporter 1-like [Malus domestica]	NA	NA	NA	-	2.33887	0.236335	0.381281	11.3495	0.971813	0.878634
MD10G1265300	PREDICTED: chlorophyll a-b binding protein of LHCII type 1-like [Malus domestica]	00196(Photosynthesis - antenna proteins)	K08912	NA	-	4.77865	1.68843	0.318703	74.6576	10.5588	3.96987
MD10G1268800	PREDICTED: transcription factor GTE12-like isoform X1 [Malus domestica]	03022(Basal transcription factors)	K03125	NA	-	29.4474	78.2192	62.6837	129.441	465.946	336.996
MD10G1268900	3-hydroxy-3-methylglutaryl coenzyme A reductase, partial [Malus domestica]	00900(Terpenoid backbone biosynthesis)	K00021	EC:1.1.1.34	-	15.3191	4.45576	4.79234	113.528	75.0958	44.2863
MD10G1273000	PREDICTED: probable LRR receptor-like serine/threonine-protein kinase At1g07650 isoform X1 [Malus domestica]	04075(Plant hormone signal transduction);04626(Plant-pathogen interaction)	K13416	EC:2.7.10.1;EC:2.7.11.1	-	5.65157	1.22504	1.26165	31.3556	9.2523	8.89691
MD10G1273200	hypothetical protein PRUPE_ppa000742mg [Prunus persica]	04075(Plant hormone signal transduction);04626(Plant-pathogen interaction)	K13416	EC:2.7.10.1;EC:2.7.11.1	-	6.24368	1.61386	2.03706	54.3423	25.9569	15.0505
MD10G1273400	PREDICTED: probable LRR receptor-like serine/threonine-protein kinase RFK1 isoform X1 [Pyrus x bretschneideri]	00520(Amino sugar and nucleotide sugar metabolism)	K01183	EC:3.2.1.14	-	5.76426	3.74599	3.58656	46.2921	27.9224	19.1599
MD10G1290100	Uncharacterized protein TCM_029816 [Theobroma cacao]	NA	NA	NA	-	1.53521	0.593321	0.799953	5.78147	3.13681	2.4528
MD10G1297600	PREDICTED: splicing factor 3B subunit 2 [Malus domestica]	03040(Spliceosome)	K12829	NA	K12829,ko03040,Spliceosome	16.5792	67.8413	64.5484	73.4838	217.684	155.53
MD10G1297800	-	NA	NA	NA	-	6.40845	27.2785	24.3048	21.4773	73.1125	54.1424
MD10G1301800	PREDICTED: probable ADP-ribosylation factor GTPase-activating protein AGD5 isoform X2 [Malus domestica]	04144(Endocytosis)	K12486	NA	-	2.23376	2.89503	3.01791	12.664	18.2491	11.7643
MD10G1311900	PREDICTED: thioredoxin-like protein CXXS1 [Malus domestica]	NA	NA	NA	-	5.99196	9.27175	9.9594	161.62	233.326	187.284
MD10G1313600	PREDICTED: cysteine-rich receptor-like protein kinase 15 [Pyrus x bretschneideri]	00520(Amino sugar and nucleotide sugar metabolism)	K01183	EC:3.2.1.14	-	1.43943	0.980982	0.780009	5.93068	7.3914	8.04743
MD10G1315000	hypothetical protein PRUPE_ppa016425mg, partial [Prunus persica]	NA	NA	NA	-	3.4791	5.83794	3.4113	11.582	21.2933	19.8619
MD10G1315100	PREDICTED: probable xyloglucan endotransglucosylase/hydrolase protein 8 [Malus domestica]	04075(Plant hormone signal transduction)	K14504	EC:2.4.1.207	-	6.20923	4.70652	5.4826	44.0022	42.5886	41.7041
MD10G1325700	PREDICTED: lysine-specific demethylase JMJ25-like isoform X2 [Malus domestica]	03010(Ribosome)	K02987	NA	-	0.887868	0.297727	0.169829	5.4892	4.15997	2.98086
MD10G1325800	PREDICTED: calcium permeable stress-gated cation channel 1 [Malus domestica]	NA	NA	NA	-	0.749793	0.0392455	0.178074	4.32257	2.09709	2.73276
MD10G1328500	constitutive photomorphogenic 1 [Malus domestica]	04120(Ubiquitin mediated proteolysis);04712(Circadian rhythm - plant)	K10143	EC:2.3.2.27	-	6.58481	10.8617	10.934	18.2257	27.5544	23.508
MD10G1333600	PREDICTED: tonoplast dicarboxylate transporter-like isoform X1 [Pyrus x bretschneideri]	NA	NA	NA	-	1.94828	0.335199	0.182513	8.72946	2.65823	1.78086
MD10G1336700	PREDICTED: uncharacterized protein LOC103963746 isoform X1 [Pyrus x bretschneideri]	NA	NA	NA	-	1.27832	1.56211	1.80878	7.82972	9.782	9.22689
MD10G1337500	PREDICTED: pollen-specific leucine-rich repeat extensin-like protein 4 isoform X1 [Malus domestica]	NA	NA	NA	-	5.63687	13.067	6.98376	80.4189	118.9	55.194
MD11G1001400	PREDICTED: pyruvate kinase, cytosolic isozyme [Malus domestica]	01200(Carbon metabolism);01230(Biosynthesis of amino acids);00010(Glycolysis / Gluconeogenesis);00620(Pyruvate metabolism);00230(Purine metabolism)	K00873	EC:2.7.1.40	K00873,ko04922,Glucagon signaling pathway;K00873,ko01200,Carbon metabolism;K00873,ko04930,Type II diabetes mellitus;K00873,ko01230,Biosynthesis of amino acids;K00873,ko05230,Central carbon metabolism in cancer;K00873,ko00620,Pyruvate metabolism;K00873,ko05203,Viral carcinogenesis;K00873,ko00230,Purine metabolism;K00873,ko00010,Glycolysis / Gluconeogenesis	62.9951	10.4299	9.00803	262.397	32.1885	17.6442
MD11G1001500	PREDICTED: pyruvate kinase, cytosolic isozyme [Malus domestica]	01200(Carbon metabolism);01230(Biosynthesis of amino acids);00010(Glycolysis / Gluconeogenesis);00620(Pyruvate metabolism);00230(Purine metabolism)	K00873	EC:2.7.1.40	K00873,ko04922,Glucagon signaling pathway;K00873,ko01200,Carbon metabolism;K00873,ko04930,Type II diabetes mellitus;K00873,ko01230,Biosynthesis of amino acids;K00873,ko05230,Central carbon metabolism in cancer;K00873,ko00620,Pyruvate metabolism;K00873,ko05203,Viral carcinogenesis;K00873,ko00230,Purine metabolism;K00873,ko00010,Glycolysis / Gluconeogenesis	58.2723	16.2966	17.6491	258.288	54.7171	30.2041
MD11G1001600	PREDICTED: pyruvate kinase, cytosolic isozyme [Malus domestica]	01200(Carbon metabolism);01230(Biosynthesis of amino acids);00010(Glycolysis / Gluconeogenesis);00620(Pyruvate metabolism);00230(Purine metabolism)	K00873	EC:2.7.1.40	-	35.8242	27.2932	30.7541	160.639	95.6871	51.4917
MD11G1002400	PREDICTED: uncharacterized protein LOC103429778 isoform X1 [Malus domestica]	04141(Protein processing in endoplasmic reticulum)	K09503	NA	-	91.1523	96.4973	83.6119	238.328	381.717	346.094
MD11G1014500	Chaperone DnaJ [Gossypium arboreum]	03018(RNA degradation)	K12603	EC:3.1.13.4	-	8.69739	0.882146	0.939294	46.6611	11.0599	5.10553
MD11G1038800	PREDICTED: uridine kinase-like protein 3 [Malus domestica]	00240(Pyrimidine metabolism)	K00876	EC:2.7.1.48	K00876,ko00983,Drug metabolism - other enzymes;K00876,ko00240,Pyrimidine metabolism	36.5479	7.63227	7.64143	148.228	46.5674	63.772
MD11G1038900	PREDICTED: fructose-bisphosphate aldolase, cytoplasmic isozyme 1 [Malus domestica]	01200(Carbon metabolism);01230(Biosynthesis of amino acids);00010(Glycolysis / Gluconeogenesis);00030(Pentose phosphate pathway);00051(Fructose and mannose metabolism);00710(Carbon fixation in photosynthetic organisms)	K01623	EC:4.1.2.13	K01623,ko01230,Biosynthesis of amino acids;K01623,ko00680,Methane metabolism;K01623,ko00710,Carbon fixation in photosynthetic organisms;K01623,ko00010,Glycolysis / Gluconeogenesis;K01623,ko00051,Fructose and mannose metabolism;K01623,ko01200,Carbon metabolism;K01623,ko00030,Pentose phosphate pathway	2.56942	0.522023	0.280728	18.9985	3.34397	2.93735
MD11G1041400	PREDICTED: chaperone protein dnaJ 11, chloroplastic-like [Malus domestica]	00240(Pyrimidine metabolism);00250(Alanine, aspartate and glutamate metabolism)	K01956	EC:6.3.5.5	-	4.84642	0.612027	1.33297	19.2818	32.1003	34.8683
MD11G1046500	PREDICTED: uncharacterized protein LOC103422751 [Malus domestica]	NA	NA	NA	-	18.1949	10.9299	10.7726	50.85	24.5163	23.6492
MD11G1052100	PREDICTED: pathogenesis-related genes transcriptional activator PTI6-like [Malus domestica]	04626(Plant-pathogen interaction)	K13434	NA	-	2.69503	0.418907	0.397698	7.63943	3.1152	1.92326
MD11G1064700	PREDICTED: cinnamoyl-CoA reductase 1 isoform X1 [Pyrus x bretschneideri]	00940(Phenylpropanoid biosynthesis)	K09753	EC:1.2.1.44	-	5.54578	8.62787	9.69107	23.5474	18.5655	21.9138
MD11G1066000	PREDICTED: probable inactive receptor-like protein kinase At3g56050 [Malus domestica]	04626(Plant-pathogen interaction)	K13436	EC:2.7.11.1	-	0.627301	0.212137	0.239569	3.1182	1.22835	1.83313
MD11G1068000	PREDICTED: zinc transporter 6, chloroplastic-like [Malus domestica]	NA	NA	NA	-	1.12211	0.421086	0.489126	4.74839	2.06721	1.25662
MD11G1079700	PREDICTED: uncharacterized protein LOC103963214 [Pyrus x bretschneideri]	NA	NA	NA	-	5.73987	2.83225	0.15231	59.0662	12.1216	6.3557
MD11G1079900	PREDICTED: josephin-like protein [Malus domestica]	03040(Spliceosome)	K12867	NA	-	3.80335	1.52804	1.76357	10.297	3.49183	3.366
MD11G1080300	PREDICTED: phosphomethylpyrimidine synthase, chloroplastic [Malus domestica]	00730(Thiamine metabolism)	K03147	EC:4.1.99.17	-	0.87298	0.248235	0.300359	3.10914	0.947834	0.748275
MD11G1080700	PREDICTED: beta-glucosidase BoGH3B-like [Malus domestica]	00500(Starch and sucrose metabolism);00460(Cyanoamino acid metabolism);00940(Phenylpropanoid biosynthesis)	K05349	EC:3.2.1.21	K05349,ko00460,Cyanoamino acid metabolism;K05349,ko00940,Phenylpropanoid biosynthesis;K05349,ko00500,Starch and sucrose metabolism	18.277	8.59338	5.2229	62.9887	58.6153	35.8611
MD11G1080800	PREDICTED: transcription factor DIVARICATA-like [Malus domestica]	00040(Pentose and glucuronate interconversions);00500(Starch and sucrose metabolism)	K01184	EC:3.2.1.15	-	2.04395	2.91873	2.82881	6.8429	27.0593	17.4072
MD11G1081100	PREDICTED: protein NRT1/ PTR FAMILY 8.2-like [Pyrus x bretschneideri]	NA	NA	NA	-	1.71518	1.57493	1.31737	5.88285	4.13737	2.47693
MD11G1081200	PREDICTED: protein NRT1/ PTR FAMILY 8.2-like isoform X1 [Pyrus x bretschneideri]	NA	NA	NA	-	2.21482	1.88072	1.83109	12.0907	8.36854	4.74633
MD11G1082600	PREDICTED: uncharacterized protein LOC103447667 [Malus domestica]	NA	NA	NA	-	9.54292	1.37776	0.706049	38.3882	54.0794	36.2785
MD11G1083900	PREDICTED: uncharacterized protein LOC103447457 [Malus domestica]	00350(Tyrosine metabolism);00950(Isoquinoline alkaloid biosynthesis)	K01592	EC:4.1.1.25	-	0.556828	0.678698	0.745099	3.87812	4.02577	3.29333
MD11G1085000	PREDICTED: probable serine/threonine-protein kinase At5g41260 [Malus domestica]	04075(Plant hormone signal transduction)	K14500	EC:2.7.11.1	K14500,ko04075,Plant hormone signal transduction	0.638556	0	0.048615	7.32426	0.80921	0.635843
MD11G1090500	PREDICTED: UDP-glycosyltransferase 76E2-like [Malus domestica]	00565(Ether lipid metabolism);00600(Sphingolipid metabolism)	K04628	EC:2.4.1.45	-	4.22676	8.14587	14.5254	44.7361	80.4717	47.1794
MD11G1090600	PREDICTED: copper transporter 1-like [Malus domestica]	NA	NA	NA	-	3.35299	11.9428	8.84815	23.2659	71.0497	63.1386
MD11G1091200	PREDICTED: uncharacterized protein LOC103447486 isoform X2 [Malus domestica]	03050(Proteasome)	K06700	NA	-	1.14405	0.744183	0.236367	3.22036	2.96837	1.97687
MD11G1092200	PREDICTED: uncharacterized protein LOC108865821 [Pyrus x bretschneideri]	04144(Endocytosis)	K07904	NA	-	31.0101	130.851	121.019	137.31	483.917	444.549
MD11G1092300	PREDICTED: metal tolerance protein B isoform X1 [Malus domestica]	04144(Endocytosis)	K07904	NA	K07904,ko04961,Endocrine and other factor-regulated calcium reabsorption;K07904,ko04972,Pancreatic secretion;K07904,ko04962,Vasopressin-regulated water reabsorption;K07904,ko04144,Endocytosis	21.0516	23.4715	23.9066	92.5907	90.1636	83.4575
MD11G1092600	PREDICTED: probable inactive 2-oxoglutarate-dependent dioxygenase AOP2 [Malus domestica]	00230(Purine metabolism)	K01951	EC:6.3.5.2	-	8.46963	0.431529	0.375942	37.1825	22.0811	10.8681
MD11G1093700	PREDICTED: tropinone reductase homolog At2g29330-like isoform X1 [Malus domestica]	00960(Tropane, piperidine and pyridine alkaloid biosynthesis)	K08081	EC:1.1.1.206	-	2.40375	4.90356	7.6229	75.4175	148.543	115.053
MD11G1107700	PREDICTED: CAX-interacting protein 4-like [Pyrus x bretschneideri]	NA	NA	NA	-	6.71595	61.6318	54.9261	20.4083	281.044	147.107
MD11G1108300	PREDICTED: outer envelope pore protein 16, chloroplastic-like isoform X3 [Pyrus x bretschneideri]	NA	NA	NA	-	4.07187	1.73243	4.18194	21.2605	28.9495	37.7567
MD11G1109700	PREDICTED: protein TRM32 isoform X1 [Malus domestica]	NA	NA	NA	-	3.03051	0.724353	0.232002	8.11165	4.14333	1.8688
MD11G1125700	PREDICTED: uncharacterized protein LOC103934299 [Pyrus x bretschneideri]	03030(DNA replication)	K10743	EC:3.1.26.4	-	9.65146	7.76126	6.59016	26.6474	14.2346	16.0998
MD11G1131400	PREDICTED: uncharacterized protein LOC103422849 [Malus domestica]	NA	NA	NA	-	6.85124	13.9289	8.65666	27.9438	24.8921	30.6315
MD11G1136200	PREDICTED: probable aquaporin PIP2-2 [Malus domestica]	00531(Glycosaminoglycan degradation)	K10532	EC:2.3.1.78	-	15.5648	5.9037	5.22073	77.0987	54.9532	67.9846
MD11G1143800	PREDICTED: LOW QUALITY PROTEIN: THO complex subunit 4A-like [Malus domestica]	03040(Spliceosome);03013(RNA transport);03015(mRNA surveillance pathway)	K12881	NA	K12881,ko03015,mRNA surveillance pathway;K12881,ko03040,Spliceosome;K12881,ko03013,RNA transport;K12881,ko05168,Herpes simplex infection	38.3699	26.753	25.6945	236.429	204.204	185.76
MD11G1150500	PREDICTED: LOW QUALITY PROTEIN: beta-glucosidase 11-like [Malus domestica]	00500(Starch and sucrose metabolism);00460(Cyanoamino acid metabolism);00940(Phenylpropanoid biosynthesis)	K01188	EC:3.2.1.21	-	2.43527	3.16189	1.47932	10.6446	7.64185	4.06664
MD11G1156400	PREDICTED: splicing factor U2af small subunit B [Malus domestica]	03040(Spliceosome)	K12836	NA	-	11.7998	43.4823	41.3758	69.0578	149.497	100.497
MD11G1159200	PREDICTED: pleiotropic drug resistance protein 2-like [Malus domestica]	02010(ABC transporters)	K05681	NA	-	0.938551	0.226628	0.17367	4.80942	0.760734	1.63955
MD11G1171700	PREDICTED: proteinaceous RNase P 2-like [Pyrus x bretschneideri]	03013(RNA transport)	K18213	EC:3.1.26.5	K18213,ko03013,RNA transport	4.51024	5.50318	4.566	13.1278	26.6894	18.3159
MD11G1174300	PREDICTED: uncharacterized protein LOC103448116 [Malus domestica]	NA	NA	NA	-	4.73476	0.876482	0.600965	32.0988	4.21092	4.33738
MD11G1176900	CXE carboxylesterase [Malus pumila]	04075(Plant hormone signal transduction)	K14493	EC:3.-.-.-	-	3.22095	0.889954	1.09555	13.0534	2.16258	2.16946
MD11G1191900	PREDICTED: photosystem II 5 kDa protein, chloroplastic [Malus domestica]	NA	NA	NA	-	12.2746	12.9936	4.75007	207.549	156.81	44.7514
MD11G1199600	PREDICTED: probable copper-transporting ATPase HMA5 [Pyrus x bretschneideri]	00190(Oxidative phosphorylation)	K01535	EC:3.6.3.6	-	0.603748	0.383268	0.714591	3.84442	1.89471	1.6542
MD11G1214900	PREDICTED: uncharacterized protein LOC108174640 [Malus domestica]	NA	NA	NA	-	2.07098	0.544441	0.639941	20.7948	1.54689	1.21914
MD11G1219500	PREDICTED: polyadenylate-binding protein RBP45C-like [Pyrus x bretschneideri]	03013(RNA transport)	K03231	NA	-	61.7435	55.2335	55.1528	341.259	320.569	311.039
MD11G1219600	PREDICTED: polyadenylate-binding protein RBP45C-like [Malus domestica]	03013(RNA transport)	K03231	NA	-	82.1058	50.5864	53.3494	457.769	320.906	321.738
MD11G1228000	PREDICTED: kinesin-3 [Malus domestica]	03008(Ribosome biogenesis in eukaryotes)	K14565	NA	-	0.87786	0.906289	0.907979	6.9543	3.73048	2.80294
MD11G1232400	PREDICTED: G-type lectin S-receptor-like serine/threonine-protein kinase At4g27290 isoform X2 [Malus domestica]	00520(Amino sugar and nucleotide sugar metabolism)	K01183	EC:3.2.1.14	-	2.36937	2.22302	1.96753	10.708	9.5053	6.49549
MD11G1232500	PREDICTED: G-type lectin S-receptor-like serine/threonine-protein kinase At4g27290 [Malus domestica]	00520(Amino sugar and nucleotide sugar metabolism)	K01183	EC:3.2.1.14	-	3.18879	2.5486	1.85732	13.6108	8.6399	4.04649
MD11G1235200	2-nonaprenyl-3-methyl-6-methoxy-1,4-benzoquinol hydroxylase [Theobroma cacao]	NA	NA	NA	-	2.52984	1.77133	2.48621	9.61135	69.2997	54.623
MD11G1238000	PREDICTED: uncharacterized protein LOC103433940 [Malus domestica]	NA	NA	NA	-	18.5677	73.2916	65.319	61.0643	261.285	213.879
MD11G1239900	PREDICTED: NAC transcription factor 56-like [Malus domestica]	00561(Glycerolipid metabolism)	K01054	EC:3.1.1.23	-	1.92366	2.27126	2.92548	10.3779	9.2549	15.3714
MD11G1241400	PREDICTED: uncharacterized protein LOC103448648 [Malus domestica]	NA	NA	NA	-	4.11042	3.07101	3.32901	33.5233	22.0876	20.3976
MD11G1241700	PREDICTED: protochlorophyllide reductase, chloroplastic [Pyrus x bretschneideri]	00860(Porphyrin and chlorophyll metabolism)	K00218	EC:1.3.1.33	-	8.09849	2.04295	0.530561	120.29	25.089	12.662
MD11G1241900	PREDICTED: LOW QUALITY PROTEIN: stem-specific protein TSJT1 [Malus domestica]	NA	NA	NA	-	330.204	303.009	171.15	991.693	1779.28	1135.95
MD11G1245200	PREDICTED: pentatricopeptide repeat-containing protein At4g21705, mitochondrial-like isoform X1 [Malus domestica]	NA	NA	NA	-	0.862283	2.93568	2.8208	4.9396	12.5469	10.8534
MD11G1248000	PREDICTED: thymidine kinase a [Pyrus x bretschneideri]	00240(Pyrimidine metabolism)	K00857	EC:2.7.1.21	-	3.08818	12.3255	8.76923	16.8092	35.8089	24.5959
MD11G1256600	PREDICTED: uncharacterized protein LOC103413308 [Malus domestica]	NA	NA	NA	-	2.95264	1.61216	2.72188	14.2997	11.8647	10.8156
MD11G1258000	-	NA	NA	NA	-	4.09944	15.8634	12.4134	13.2889	44.2417	21.4007
MD11G1270400	PREDICTED: alpha,alpha-trehalose-phosphate synthase [UDP-forming] 1-like [Malus domestica]	00500(Starch and sucrose metabolism)	K16055	EC:2.4.1.15;EC:3.1.3.12	K16055,ko00500,Starch and sucrose metabolism	4.73985	1.66395	2.10019	15.9559	12.3455	11.0544
MD11G1272500	PREDICTED: protein SRG1-like [Pyrus x bretschneideri]	00941(Flavonoid biosynthesis)	K05278	EC:1.14.11.23	-	13.3408	12.5839	8.24879	35.0962	30.4965	21.5995
MD11G1274100	PREDICTED: cytochrome P450 CYP72A219-like [Malus domestica]	00905(Brassinosteroid biosynthesis)	K15639	EC:1.14.-.-	-	4.66481	6.65107	8.53966	38.2048	28.6813	17.6763
MD11G1275400	PREDICTED: F-box/FBD/LRR-repeat protein At4g00160-like isoform X1 [Malus domestica]	NA	NA	NA	-	0.676974	0.463818	0.349198	1.86456	1.9721	1.1185
MD11G1277500	PREDICTED: 2-methyl-6-phytyl-1,4-hydroquinone methyltransferase, chloroplastic-like [Malus domestica]	00130(Ubiquinone and other terpenoid-quinone biosynthesis)	K12502	EC:2.1.1.295	K12502,ko00130,Ubiquinone and other terpenoid-quinone biosynthesis	6.14398	5.7573	3.64495	43.5547	17.8324	12.236
MD11G1277900	PREDICTED: uncharacterized protein LOC103430178 [Malus domestica]	NA	NA	NA	-	5.21021	15.4529	13.6048	14.7371	59.9857	36.6881
MD11G1287600	PREDICTED: outer envelope membrane protein 7-like [Malus domestica]	03050(Proteasome)	K03062	NA	-	29.3967	4.60153	3.49974	142.186	16.6322	17.4376
MD11G1287700	PREDICTED: small nuclear ribonucleoprotein Sm D1-like [Malus domestica]	03040(Spliceosome)	K11087	NA	K11087,ko03040,Spliceosome;K11087,ko05322,Systemic lupus erythematosus	18.656	6.02859	5.24659	53.693	12.189	12.258
MD11G1292500	PREDICTED: methyl-CpG-binding domain-containing protein 4-like [Malus domestica]	NA	NA	NA	-	5.58046	12.8435	11.0803	29.1255	78.2237	49.5208
MD11G1293500	PREDICTED: probable LRR receptor-like serine/threonine-protein kinase RKF3 [Malus domestica]	04075(Plant hormone signal transduction);04626(Plant-pathogen interaction)	K13416	EC:2.7.10.1;EC:2.7.11.1	-	0.624225	0.370925	0.437592	2.37146	1.83263	1.9567
MD11G1304300	PREDICTED: protein LOW PSII ACCUMULATION 1, chloroplastic-like [Malus domestica]	NA	NA	NA	-	1.25648	0.958479	0.682201	5.04298	3.4776	1.76753
MD11G1304800	PREDICTED: xyloglucan 6-xylosyltransferase 2 [Malus domestica]	NA	NA	NA	-	2.61075	5.04746	3.77931	8.67369	11.4897	12.3098
MD11G1305700	PREDICTED: thiamine pyrophosphokinase 1-like isoform X1 [Malus domestica]	00730(Thiamine metabolism)	K00949	EC:2.7.6.2	K00949,ko00730,Thiamine metabolism	2.65732	0.595415	0.392967	16.7236	3.14788	2.00692
MD11G1306500	ethylene-responsive transcription factor ERF071-like [Malus domestica]	04626(Plant-pathogen interaction)	K13434	NA	-	1.68954	1.37257	1.20264	52.8727	70.8503	48.7293
MD11G1307000	sucrose synthase 3 [Malus domestica]	00500(Starch and sucrose metabolism)	K00695	EC:2.4.1.13	K00695,ko00500,Starch and sucrose metabolism	114.933	56.2084	61.4415	411.107	205.546	100.622
MD11G1308900	PREDICTED: U3 small nucleolar RNA-associated protein 14-like [Malus domestica]	03008(Ribosome biogenesis in eukaryotes)	K14567	NA	-	4.14977	8.76904	7.81309	11.4767	18.292	17.4477
MD11G1313700	PREDICTED: uncharacterized protein LOC103449194 [Malus domestica]	NA	NA	NA	-	2.35811	0.397064	0.72066	6.27157	2.84895	2.15443
MD11G1314900	PREDICTED: ribosomal RNA small subunit methyltransferase-like [Malus domestica]	NA	NA	NA	-	4.465	3.15858	3.99821	11.8446	14.3746	11.2789
MD11G1317900	PREDICTED: endoglucanase 9-like [Malus domestica]	00500(Starch and sucrose metabolism)	K01179	EC:3.2.1.4	-	1.00878	0.134854	0.265736	3.07743	1.35317	1.21951
MD12G1004700	PREDICTED: tubulin alpha-3 chain-like [Malus domestica]	04145(Phagosome)	K07374	NA	K07374,ko04145,Phagosome;K07374,ko04210,Apoptosis;K07374,ko05130,Pathogenic Escherichia coli infection;K07374,ko04540,Gap junction	16.2479	8.14957	5.42234	85.942	18.8127	13.4087
MD12G1007200	PREDICTED: binding partner of ACD11 1 [Malus domestica]	NA	NA	NA	-	20.2237	41.7744	44.053	97.1735	194.955	216.88
MD12G1008000	PREDICTED: nucleolar MIF4G domain-containing protein 1 [Malus domestica]	00970(Aminoacyl-tRNA biosynthesis)	K01872	EC:6.1.1.7	-	3.66254	7.30365	7.07942	11.0779	29.5495	18.2372
MD12G1017300	PREDICTED: protein CDI-like [Malus domestica]	NA	NA	NA	-	3.67443	1.92367	1.45356	19.1784	3.36535	5.75134
MD12G1017400	PREDICTED: tocopherol O-methyltransferase, chloroplastic-like [Pyrus x bretschneideri]	00130(Ubiquinone and other terpenoid-quinone biosynthesis)	K05928	EC:2.1.1.95	-	1.88787	5.26463	5.39416	8.75358	21.9217	20.8761
MD12G1018700	PREDICTED: LOW QUALITY PROTEIN: fructose-bisphosphate aldolase, cytoplasmic isozyme-like [Malus domestica]	01200(Carbon metabolism);01230(Biosynthesis of amino acids);00010(Glycolysis / Gluconeogenesis);00030(Pentose phosphate pathway);00051(Fructose and mannose metabolism);00710(Carbon fixation in photosynthetic organisms)	K01623	EC:4.1.2.13	K01623,ko01230,Biosynthesis of amino acids;K01623,ko00680,Methane metabolism;K01623,ko00710,Carbon fixation in photosynthetic organisms;K01623,ko00010,Glycolysis / Gluconeogenesis;K01623,ko00051,Fructose and mannose metabolism;K01623,ko01200,Carbon metabolism;K01623,ko00030,Pentose phosphate pathway	63.8718	10.5219	9.29706	334.574	93.3265	70.1448
MD12G1026200	putative polyol transporter 1 [Malus domestica]	NA	NA	NA	-	10.8814	1.86829	1.19812	29.5511	4.20966	3.15378
MD12G1029200	PREDICTED: uncharacterized protein LOC103961719 [Pyrus x bretschneideri]	NA	NA	NA	-	0.489444	0.266993	0.142525	2.83292	1.45901	1.09361
MD12G1032900	PREDICTED: 40S ribosomal protein S17-4-like [Malus domestica]	03010(Ribosome)	K02962	NA	K02962,ko03010,Ribosome	89.787	71.364	83.9972	267.302	230.544	250.316
MD12G1035800	PREDICTED: uncharacterized protein LOC103452045 [Malus domestica]	NA	NA	NA	-	3.88172	5.02208	1.2005	37.7826	147.974	57.2125
MD12G1047000	PREDICTED: amino acid transporter ANT1 [Malus domestica]	NA	NA	NA	-	15.9919	10.5537	8.79741	59.2864	34.7914	27.6524
MD12G1052800	PREDICTED: lipid phosphate phosphatase delta-like [Malus domestica]	00600(Sphingolipid metabolism)	K04716	EC:3.1.3.-	-	2.78106	1.17371	1.17164	54.9613	15.8872	9.58586
MD12G1056100	PREDICTED: uncharacterized protein LOC103958871 [Pyrus x bretschneideri]	NA	NA	NA	-	1.80227	5.65078	4.40527	6.72761	11.4	9.74005
MD12G1074600	PREDICTED: uncharacterized protein LOC103454430 [Malus domestica]	NA	NA	NA	-	1.37077	1.66869	1.10132	7.20605	6.14399	4.02977
MD12G1086300	PREDICTED: U4/U6 small nuclear ribonucleoprotein PRP4-like protein [Malus domestica]	03040(Spliceosome)	K12662	NA	-	6.68808	7.82244	7.50408	21.6222	31.6417	24.2898
MD12G1097000	PREDICTED: LOW QUALITY PROTEIN: uncharacterized protein LOC103927674 [Pyrus x bretschneideri]	00240(Pyrimidine metabolism)	K09903	EC:2.7.4.22	-	3.04062	8.27224	6.42997	13.8318	44.6836	26.6187
MD12G1097200	PREDICTED: leucine-rich repeat receptor-like protein kinase PXC1 [Pyrus x bretschneideri]	00240(Pyrimidine metabolism)	K09903	EC:2.7.4.22	-	3.08658	1.50361	1.52602	10.9723	8.87646	5.64709
MD12G1102500	PREDICTED: aspartic proteinase-like protein 2 [Malus domestica]	00904(Diterpenoid biosynthesis)	K04120	EC:5.5.1.13	-	1.86413	0.234565	0.255438	7.52759	0.974378	0.813131
MD12G1106200	PREDICTED: LOW QUALITY PROTEIN: WD repeat-containing protein 3 [Malus domestica]	03008(Ribosome biogenesis in eukaryotes)	K14556	NA	K14556,ko03008,Ribosome biogenesis in eukaryotes	4.42786	8.15833	7.98033	12.807	24.7102	23.1568
MD12G1114200	PREDICTED: UDP-glycosyltransferase 86A1-like [Malus domestica]	00908(Zeatin biosynthesis)	NA	NA	-	0.681228	1.53395	0.63344	5.30921	10.7351	7.82672
MD12G1119800	PREDICTED: uncharacterized protein LOC103450101 [Malus domestica]	NA	NA	NA	-	3.64198	0.517241	0.420215	10.8699	3.5066	2.33875
MD12G1120400	PREDICTED: syntaxin-71-like [Malus domestica]	04130(SNARE interactions in vesicular transport)	K08506	NA	K08506,ko04130,SNARE interactions in vesicular transport	24.4026	9.6932	9.72974	76.1634	29.4462	30.04
MD12G1123500	PREDICTED: protein IQ-DOMAIN 1-like [Pyrus x bretschneideri]	NA	NA	NA	-	6.50283	8.14599	8.04164	29.1584	20.7467	21.9697
MD12G1131100	PREDICTED: LOW QUALITY PROTEIN: protein ALUMINUM SENSITIVE 3-like [Malus domestica]	NA	NA	NA	-	4.47547	1.22028	1.16085	12.9565	3.95669	2.93003
MD12G1139800	PREDICTED: histone H4 [Malus domestica]	NA	NA	NA	K11254,ko05203,Viral carcinogenesis;K11254,ko05034,Alcoholism;K11254,ko05322,Systemic lupus erythematosus	16.886	15.2647	12.8716	52.7758	34.6584	35.6678
MD12G1149300	PREDICTED: transcription factor EMB1444-like isoform X2 [Malus domestica]	NA	NA	NA	-	14.3164	6.77738	7.02073	40.4579	18.4705	16.6768
MD12G1150100	hypothetical protein VITISV_025518 [Vitis vinifera]	00040(Pentose and glucuronate interconversions);00052(Galactose metabolism);00053(Ascorbate and aldarate metabolism);00520(Amino sugar and nucleotide sugar metabolism)	K12447	EC:2.7.7.64	-	0.295024	0.169895	0.128086	18.3601	13.409	10.7311
MD12G1156200	PREDICTED: 7-deoxyloganetic acid glucosyltransferase-like [Malus domestica]	00908(Zeatin biosynthesis)	NA	NA	-	28.8213	55.5353	41.9172	101.352	303.778	190.611
MD12G1156800	transcription factor MYB44-like [Malus domestica]	NA	NA	NA	-	6.44287	8.439	9.05334	19.5972	27.0646	36.667
MD12G1158200	PREDICTED: heme-binding-like protein At3g10130, chloroplastic [Malus domestica]	NA	NA	NA	-	7.88836	4.76021	2.29215	25.8841	17.1324	16.9993
MD12G1158600	PREDICTED: LOW QUALITY PROTEIN: protein SSUH2 homolog [Malus domestica]	NA	NA	NA	-	61.2175	59.286	57.4253	309.917	540.946	311.912
MD12G1162600	PREDICTED: uncharacterized protein LOC108170902 [Malus domestica]	NA	NA	NA	-	2.46988	1.16995	1.4931	7.21863	4.13909	2.94014
MD12G1165400	PREDICTED: chlorophyll a-b binding protein CP29.1, chloroplastic-like [Malus domestica]	00196(Photosynthesis - antenna proteins)	K08915	NA	K08915,ko00196,Photosynthesis - antenna proteins	11.1751	1.23255	1.11852	85.4396	14.2157	6.17684
MD12G1176400	PREDICTED: EG45-like domain containing protein [Malus domestica]	NA	NA	NA	-	1.63196	0.695122	0.925192	12.0533	5.33753	3.21289
MD12G1183000	PREDICTED: protein LURP-one-related 15-like [Malus domestica]	NA	NA	NA	-	9.9751	0.754033	0.631637	37.0491	1.22661	1.67848
MD12G1186000	PREDICTED: probable serine/threonine-protein kinase WNK5 [Malus domestica]	04626(Plant-pathogen interaction)	K13414	EC:2.7.11.25	-	0.664638	0.938096	0.121075	24.9068	4.29832	2.35649
MD12G1192800	PREDICTED: probable LRR receptor-like serine/threonine-protein kinase At1g06840 [Malus domestica]	04626(Plant-pathogen interaction)	K13430	EC:2.7.11.1	-	1.06249	0.754625	0.547849	3.79197	2.33677	1.56103
MD12G1196800	PREDICTED: DEAD-box ATP-dependent RNA helicase 3, chloroplastic-like [Pyrus x bretschneideri]	00270(Cysteine and methionine metabolism);00480(Glutathione metabolism)	K01919	EC:6.3.2.2	-	11.236	5.20797	3.01718	33.9323	19.0692	11.0865
MD12G1197300	PREDICTED: glutamate--tRNA ligase, cytoplasmic [Pyrus x bretschneideri]	00860(Porphyrin and chlorophyll metabolism);00970(Aminoacyl-tRNA biosynthesis)	K01885	EC:6.1.1.17	K01885,ko00860,Porphyrin and chlorophyll metabolism;K01885,ko00970,Aminoacyl-tRNA biosynthesis	20.7316	12.628	13.1198	84.1792	151.078	88.9151
MD12G1198800	PREDICTED: titin-like [Pyrus x bretschneideri]	NA	NA	NA	-	56.0609	418.892	402.552	153.886	1275.72	835.959
MD12G1199200	PREDICTED: hydrophobic protein RCI2B-like [Malus domestica]	NA	NA	NA	-	21.0954	1.35045	1.49396	107.107	8.45103	5.11755
MD12G1202400	PREDICTED: pyrrolidone-carboxylate peptidase [Malus domestica]	NA	NA	NA	-	15.9704	5.53738	3.54401	196.73	87.8264	59.1901
MD12G1204400	PREDICTED: importin subunit alpha-4 [Malus domestica]	NA	NA	NA	-	5.13174	6.58396	5.29167	17.2026	56.0454	30.9126
MD12G1204700	PREDICTED: NHL repeat-containing protein 2 [Malus domestica]	00740(Riboflavin metabolism)	K00861	EC:2.7.1.26	-	5.28637	2.84321	2.07032	16.9966	8.46738	5.98141
MD12G1206600	PREDICTED: pyrophosphate-energized vacuolar membrane proton pump 1 [Malus domestica]	00190(Oxidative phosphorylation)	K01507	EC:3.6.1.1	-	102.421	50.163	52.6796	375.884	251.064	205.563
MD12G1206900	PREDICTED: universal stress protein Slr1101-like [Malus domestica]	NA	NA	NA	-	24.1641	18.8245	15.6816	226.589	781.875	610.275
MD12G1208400	PREDICTED: exopolyphosphatase-like [Malus domestica]	NA	NA	NA	-	1.11458	0.391805	0.165927	3.50931	1.94813	1.18105
MD12G1209900	PREDICTED: topless-related protein 3-like [Malus domestica]	03008(Ribosome biogenesis in eukaryotes)	K14558	NA	-	11.7685	5.38399	4.82186	67.7817	20.0132	20.9318
MD12G1214900	hypothetical protein PRUPE_ppa020120mg [Prunus persica]	NA	NA	NA	-	1.52514	2.96868	2.17711	4.28487	6.47605	5.28748
MD12G1218200	probable linoleate 9S-lipoxygenase 5 [Malus domestica]	00591(Linoleic acid metabolism)	K15718	EC:1.13.11.58	K15718,ko00591,Linoleic acid metabolism	1.81513	2.57183	2.21288	10.5987	8.03345	9.53268
MD12G1220800	PREDICTED: amidase 1-like isoform X4 [Pyrus x bretschneideri]	00970(Aminoacyl-tRNA biosynthesis)	K02433	EC:6.3.5.6;EC:6.3.5.7	K01426,ko00360,Phenylalanine metabolism;K01426,ko00330,Arginine and proline metabolism;K01426,ko00380,Tryptophan metabolism;K01426,ko00643,Styrene degradation;K01426,ko00627,Aminobenzoate degradation	1.09292	0.504622	0.543208	10.0394	1.64278	2.20301
MD12G1223900	PREDICTED: GDSL esterase/lipase At1g54790-like isoform X3 [Malus domestica]	04144(Endocytosis)	K10396	NA	-	2.21522	0.143043	0.0934628	10.7201	1.5125	1.26769
MD12G1224200	PREDICTED: sodium/hydrogen exchanger 1-like [Malus domestica]	NA	NA	NA	-	16.0883	3.55845	3.24403	44.1141	8.51409	7.94664
MD12G1239000	PREDICTED: perakine reductase-like [Malus domestica]	00750(Vitamin B6 metabolism)	K05275	EC:1.1.1.65	-	2.44219	1.87727	1.26651	6.94024	12.6747	8.16244
MD12G1243700	PREDICTED: histone H1.2-like [Malus domestica]	NA	NA	NA	-	25.294	32.9166	30.5279	96.9602	108.279	86.0064
MD12G1244100	PREDICTED: uncharacterized protein LOC103451044 [Malus domestica]	00052(Galactose metabolism);00561(Glycerolipid metabolism);00600(Sphingolipid metabolism);00603(Glycosphingolipid biosynthesis - globo series)	K07407	EC:3.2.1.22	-	1.98749	0.689373	0.941195	5.85408	1.91168	1.84232
MD12G1249100	PREDICTED: ankyrin repeat domain-containing protein 13B-like [Pyrus x bretschneideri]	NA	NA	NA	-	15.5148	8.41907	7.29715	41.7295	30.9714	26.4401
MD12G1249200	PREDICTED: ankyrin repeat domain-containing protein 13B [Malus domestica]	NA	NA	NA	-	15.922	28.857	24.452	47.4672	113.186	85.3485
MD12G1250600	PREDICTED: exosome complex component csl4 [Pyrus x bretschneideri]	03018(RNA degradation)	K07573	NA	K07573,ko03018,RNA degradation	7.93942	2.00551	1.81997	27.6789	10.9184	8.84138
MD12G1255200	PREDICTED: violaxanthin de-epoxidase, chloroplastic [Malus domestica]	00906(Carotenoid biosynthesis)	K09839	EC:1.23.5.1	-	4.07681	2.38132	1.51751	21.7047	18.2951	12.7413
MD12G1256600	PREDICTED: uncharacterized protein LOC103414019 [Malus domestica]	NA	NA	NA	-	1.53091	1.10584	0.699434	5.38545	2.95486	2.59099
MD12G1263000	PREDICTED: peptide chain release factor PrfB1, chloroplastic [Malus domestica]	NA	NA	NA	-	1.36742	0.963443	0.777165	3.85036	6.6702	7.32502
MD13G1000100	PREDICTED: sphingoid long-chain bases kinase 1-like [Malus domestica]	00600(Sphingolipid metabolism)	K04718	EC:2.7.1.91	-	20.5085	15.4701	13.6318	55.817	41.9994	33.8747
MD13G1000500	PREDICTED: pyruvate kinase, cytosolic isozyme [Malus domestica]	01200(Carbon metabolism);01230(Biosynthesis of amino acids);00010(Glycolysis / Gluconeogenesis);00620(Pyruvate metabolism);00230(Purine metabolism)	K00873	EC:2.7.1.40	-	13.6057	14.4072	14.3566	60.5129	87.0874	45.5487
MD13G1001600	PREDICTED: uncharacterized protein LOC103451437 [Malus domestica]	04626(Plant-pathogen interaction)	K13459	NA	-	34.5406	153.88	164.408	193.842	896.442	599.521
MD13G1002700	transcription factor DIVARICATA-like [Malus domestica]	NA	NA	NA	-	3.67623	2.99289	3.5994	11.5706	10.6743	8.85771
MD13G1022100	spur-type DELLA protein [Malus domestica]	04075(Plant hormone signal transduction)	K14494	NA	-	4.66709	4.52527	5.89809	16.8342	13.9923	15.8885
MD13G1024400	PREDICTED: SEC12-like protein 2 isoform X1 [Malus domestica]	04141(Protein processing in endoplasmic reticulum)	K14003	NA	K14003,ko04141,Protein processing in endoplasmic reticulum	3.36477	3.94275	4.81191	10.3349	11.9757	8.67282
MD13G1025200	PREDICTED: homeobox-leucine zipper protein HOX3-like [Pyrus x bretschneideri]	00750(Vitamin B6 metabolism)	K05275	EC:1.1.1.65	-	1.99501	1.05419	1.39151	11.5495	5.1391	4.18885
MD13G1026500	PREDICTED: multicopper oxidase LPR2-like [Pyrus x bretschneideri]	NA	NA	NA	-	12.8682	1.45169	0.878256	40.985	11.3007	9.75375
MD13G1030600	PREDICTED: protein PLANT CADMIUM RESISTANCE 2-like [Malus domestica]	04141(Protein processing in endoplasmic reticulum)	K14006	NA	-	7.58301	1.89028	1.75754	21.3187	9.79332	4.70839
MD13G1034900	PREDICTED: hormone receptor 4-like [Malus domestica]	NA	NA	NA	-	26.5922	43.9606	41.6639	75.6079	217.915	143.975
MD13G1035500	PREDICTED: uncharacterized protein LOC103423737 [Malus domestica]	NA	NA	NA	-	55.5894	85.0018	94.2907	153.649	301.501	342.129
MD13G1035800	-	NA	NA	NA	-	2.99998	1.53516	2.31474	12.7425	4.90538	3.95122
MD13G1035900	PREDICTED: probable F-box protein At4g22060 [Malus domestica]	NA	NA	NA	-	34.3541	44.6314	45.5887	93.1818	128.106	106.084
MD13G1043200	NRT1/PTR family 3.1 protein [Pyrus betulifolia]	NA	NA	NA	-	9.98397	10.5747	12.2521	107.882	41.8681	22.2446
MD13G1043900	PREDICTED: uncharacterized protein LOC103423860, partial [Malus domestica]	04144(Endocytosis)	K19476	NA	-	2.84402	0.81684	0.677733	33.1006	37.1041	16.1982
MD13G1045900	PREDICTED: allene oxide cyclase 4, chloroplastic [Malus domestica]	00592(alpha-Linolenic acid metabolism)	K10525	EC:5.3.99.6	K10525,ko00592,alpha-Linolenic acid metabolism	0.950055	0.38355	0.243646	6.23464	2.13641	1.43076
MD13G1046100	PREDICTED: AP2/ERF and B3 domain-containing transcription factor RAV1-like [Malus domestica]	01200(Carbon metabolism);01230(Biosynthesis of amino acids);00010(Glycolysis / Gluconeogenesis);03018(RNA degradation)	K01689	EC:4.2.1.11	-	2.04444	0.944857	0.580424	29.3096	25.3244	10.0124
MD13G1056600	PREDICTED: D-aminoacyl-tRNA deacylase [Malus domestica]	NA	NA	NA	-	117.488	103.593	101.17	1069.19	1295.15	934.1
MD13G1056700	PREDICTED: translin-associated protein X-like [Malus domestica]	NA	NA	NA	-	7.40885	5.93137	4.7038	20.3939	20.2874	16.1427
MD13G1057400	PREDICTED: cytochrome P450 CYP749A22-like [Malus domestica]	00905(Brassinosteroid biosynthesis)	K15639	EC:1.14.-.-	K15639,ko00905,Brassinosteroid biosynthesis	2.37586	2.07946	3.77415	10.4502	18.1999	48.4686
MD13G1065000	-	NA	NA	NA	-	2.38964	0.923385	1.48438	14.0456	12.7276	11.5413
MD13G1073400	PREDICTED: probable ran guanine nucleotide release factor [Malus domestica]	NA	NA	NA	-	1.58193	1.00911	1.50706	4.87725	4.35513	4.69313
MD13G1074900	PREDICTED: uncharacterized protein LOC103452334, partial [Malus domestica]	NA	NA	NA	-	4.6696	3.44872	1.23423	22.1433	11.6662	7.6431
MD13G1077200	PREDICTED: probable LRR receptor-like serine/threonine-protein kinase At1g14390 [Malus domestica]	04075(Plant hormone signal transduction)	K13415	EC:2.7.10.1;EC:2.7.11.1	-	1.8542	2.69283	4.35161	14.9925	8.41395	11.743
MD13G1078800	PREDICTED: hypersensitive-induced response protein 2 [Pyrus x bretschneideri]	NA	NA	NA	-	44.7703	35.6619	26.6805	676.766	424.137	318.502
MD13G1079100	PREDICTED: protein TWIN LOV 1 [Malus domestica]	04712(Circadian rhythm - plant)	K12115	NA	-	7.81189	5.91626	6.5278	55.9621	44.9232	22.4358
MD13G1079300	PREDICTED: protein NRT1/ PTR FAMILY 4.6 [Pyrus x bretschneideri]	NA	NA	NA	-	0.574194	0.123823	0.161809	20.4861	22.6411	11.2759
MD13G1081500	PREDICTED: dnaJ homolog subfamily B member 4 [Malus domestica]	04141(Protein processing in endoplasmic reticulum)	K09503	NA	-	4.2043	5.04132	7.74334	11.185	12.6499	16.0317
MD13G1085600	PREDICTED: uncharacterized protein LOC103950917 [Pyrus x bretschneideri]	NA	NA	NA	-	2.39553	0.344636	0.417003	8.22979	6.76761	3.37632
MD13G1090600	PREDICTED: aldehyde dehydrogenase family 2 member B7, mitochondrial-like [Malus domestica]	00010(Glycolysis / Gluconeogenesis);00040(Pentose and glucuronate interconversions);00053(Ascorbate and aldarate metabolism);00620(Pyruvate metabolism);00071(Fatty acid degradation);00561(Glycerolipid metabolism);00280(Valine, leucine and isoleucine degradation);00310(Lysine degradation);00330(Arginine and proline metabolism);00340(Histidine metabolism);00380(Tryptophan metabolism);00410(beta-Ala…	K00128	EC:1.2.1.3	K00128,ko00310,Lysine degradation;K00128,ko00053,Ascorbate and aldarate metabolism;K00128,ko00380,Tryptophan metabolism;K00128,ko00625,Chloroalkane and chloroalkene degradation;K00128,ko00410,beta-Alanine metabolism;K00128,ko00280,Valine, leucine and isoleucine degradation;K00128,ko00010,Glycolysis / Gluconeogenesis;K00128,ko00330,Arginine and proline metabolism;K00128,ko00903,Limonene and pinene…	14.9135	11.8709	12.5042	40.7103	49.8483	71.9146
MD13G1095500	PREDICTED: protein NSP-INTERACTING KINASE 3-like isoform X1 [Malus domestica]	04075(Plant hormone signal transduction);04626(Plant-pathogen interaction)	K13416	EC:2.7.10.1;EC:2.7.11.1	-	1.19365	0.378252	0.40839	5.72055	0.937623	0.920931
MD13G1102100	PREDICTED: protein DETOXIFICATION 29-like [Malus domestica]	NA	NA	NA	-	1.14992	0.179917	0.0870782	22.7983	5.40144	1.57278
MD13G1102300	PREDICTED: copper methylamine oxidase-like isoform X1 [Malus domestica]	00260(Glycine, serine and threonine metabolism);00350(Tyrosine metabolism);00360(Phenylalanine metabolism);00410(beta-Alanine metabolism);00950(Isoquinoline alkaloid biosynthesis);00960(Tropane, piperidine and pyridine alkaloid biosynthesis)	K00276	EC:1.4.3.21	K00276,ko00950,Isoquinoline alkaloid biosynthesis;K00276,ko00360,Phenylalanine metabolism;K00276,ko00410,beta-Alanine metabolism;K00276,ko00960,Tropane, piperidine and pyridine alkaloid biosynthesis;K00276,ko00350,Tyrosine metabolism;K00276,ko00260,Glycine, serine and threonine metabolism	16.8493	4.35924	3.18016	78.7271	30.8812	25.878
MD13G1102400	PREDICTED: uncharacterized protein LOC103452040 [Malus domestica]	00260(Glycine, serine and threonine metabolism);00350(Tyrosine metabolism);00360(Phenylalanine metabolism);00410(beta-Alanine metabolism);00950(Isoquinoline alkaloid biosynthesis);00960(Tropane, piperidine and pyridine alkaloid biosynthesis)	K00276	EC:1.4.3.21	-	1.22937	2.39423	1.47517	11.593	25.3397	20.4548
MD13G1112200	PREDICTED: uncharacterized protein LOC103430673 [Malus domestica]	NA	NA	NA	-	1.46376	0.520187	0.604239	3.98323	0.969105	1.40079
MD13G1118800	PREDICTED: REF/SRPP-like protein At1g67360 [Malus domestica]	00510(N-Glycan biosynthesis);04141(Protein processing in endoplasmic reticulum)	K01228	EC:3.2.1.106	-	10.792	25.3786	17.8852	113.005	53.259	45.1447
MD13G1119900	PREDICTED: probable methyltransferase At1g27930 [Malus domestica]	03010(Ribosome)	K02918	NA	-	2.29921	2.43164	1.15062	7.3418	4.36997	4.32922
MD13G1120800	PREDICTED: uncharacterized protein LOC103452159 [Malus domestica]	04141(Protein processing in endoplasmic reticulum)	K09518	NA	-	6.42896	22.8823	21.0405	30.9705	118.348	70.7723
MD13G1121200	PREDICTED: calmodulin-binding transcription activator 4-like [Malus domestica]	NA	NA	NA	-	1.72134	0.913316	0.681475	12.3734	6.75747	5.76619
MD13G1125100	PREDICTED: uncharacterized protein LOC103929036 [Pyrus x bretschneideri]	NA	NA	NA	-	8.55988	4.55671	4.8266	37.5116	27.0528	20.0294
MD13G1126800	PREDICTED: uncharacterized protein LOC103448249 [Malus domestica]	01200(Carbon metabolism);01230(Biosynthesis of amino acids);00920(Sulfur metabolism);00270(Cysteine and methionine metabolism)	K00640	EC:2.3.1.30	-	5.64682	13.4854	9.69275	22.5661	83.9817	139.42
MD13G1128000	PREDICTED: uncharacterized protein LOC103452474 [Malus domestica]	NA	NA	NA	-	4.1825	7.04316	5.88024	12.7116	17.6361	14.3063
MD13G1131000	PREDICTED: glycine--tRNA ligase, mitochondrial 1-like [Pyrus x bretschneideri]	00970(Aminoacyl-tRNA biosynthesis)	K01880	EC:6.1.1.14	K01880,ko00970,Aminoacyl-tRNA biosynthesis	45.9738	52.4499	46.1149	130.153	130.296	102.826
MD13G1134500	PREDICTED: respiratory burst oxidase homolog protein D-like [Malus domestica]	04626(Plant-pathogen interaction)	K13447	EC:1.6.3.-;EC:1.11.1.-	K13447,ko04626,Plant-pathogen interaction	1.78047	0.199593	0.144902	6.45772	2.6569	2.33139
MD13G1134900	PREDICTED: LOW QUALITY PROTEIN: histone-lysine N-methyltransferase ASHR2-like [Pyrus x bretschneideri]	NA	NA	NA	-	3.66579	2.65872	3.13006	9.97603	8.10455	6.04331
MD13G1136900	PREDICTED: calponin homology domain-containing protein DDB_G0272472-like isoform X1 [Pyrus x bretschneideri]	01230(Biosynthesis of amino acids);00220(Arginine biosynthesis);00330(Arginine and proline metabolism)	K01476	EC:3.5.3.1	-	7.61324	58.2125	56.3119	27.7787	245.618	261.558
MD13G1146100	PREDICTED: DNA (cytosine-5)-methyltransferase DRM1 [Malus domestica]	NA	NA	NA	-	3.96301	2.71566	2.86929	10.9261	13.2128	9.99867
MD13G1147200	PREDICTED: hydroxyproline O-galactosyltransferase GALT3-like [Malus domestica]	NA	NA	NA	-	0.534646	0.633238	0.681376	1.45987	1.70809	1.75885
MD13G1159000	PREDICTED: GATA transcription factor 15 [Pyrus x bretschneideri]	NA	NA	NA	-	1.49284	2.80244	2.2195	5.75054	5.36631	5.88774
MD13G1160800	major allergen Mal d 1.03B [Malus domestica]	NA	NA	NA	-	52.5734	11.3697	11.1031	320.594	1492.53	462.453
MD13G1161100	PREDICTED: major allergen Mal d 1-like [Malus domestica]	NA	NA	NA	-	14.1812	3.88254	1.07378	76.675	3.44436	34.2188
MD13G1169100	PREDICTED: probable protein phosphatase 2C 40 [Malus domestica]	NA	NA	NA	-	1.40342	0.264001	0.258743	4.03093	1.30601	1.57569
MD13G1170000	PREDICTED: uncharacterized protein LOC103943640 [Pyrus x bretschneideri]	NA	NA	NA	-	1.25421	0.377242	0.38743	3.88486	1.21612	1.29802
MD13G1173500	PREDICTED: CASP-like protein 1D1 [Malus domestica]	NA	NA	NA	-	2.76205	0.482566	0.105101	23.5771	13.9591	10.2989
MD13G1174400	PREDICTED: vesicle-associated protein 2-2-like [Malus domestica]	NA	NA	NA	-	0.980454	1.1467	1.48287	3.67892	4.11381	4.42337
MD13G1175900	PREDICTED: sugar transporter ERD6-like 16 [Malus domestica]	NA	NA	NA	-	4.97432	0.552524	0.750826	13.8275	4.33354	5.77808
MD13G1176300	histidine-containing phosphotransfer 1a [Malus domestica]	04075(Plant hormone signal transduction)	K14490	NA	-	2.07984	0.444831	0.376766	7.29916	3.33167	4.12325
MD13G1181300	PREDICTED: endo-1,3;1,4-beta-D-glucanase-like [Malus domestica]	NA	NA	NA	-	7.8341	1.17962	0.955206	23.209	3.39239	2.29762
MD13G1181400	PREDICTED: endo-1,3;1,4-beta-D-glucanase-like [Malus domestica]	NA	NA	NA	-	38.6074	10.9992	6.99724	162.523	29.5583	24.1637
MD13G1184800	PREDICTED: basic 7S globulin-like [Malus domestica]	NA	NA	NA	-	1.25532	0.269533	0.195678	10.3487	1.76427	1.78745
MD13G1185200	PREDICTED: nuclear transcription factor Y subunit C-3-like [Malus domestica]	00230(Purine metabolism);00240(Pyrimidine metabolism);03020(RNA polymerase)	K03004	NA	K08066,ko04612,Antigen processing and presentation;K08066,ko05152,Tuberculosis	10.0831	3.78944	4.05785	30.639	32.5736	22.0603
MD13G1191300	PREDICTED: photosystem I reaction center subunit II, chloroplastic-like [Malus domestica]	00195(Photosynthesis)	K02692	NA	-	39.4737	40.713	14.7448	196.726	127.517	53.9223
MD13G1193000	PREDICTED: uncharacterized protein LOC103453120 [Malus domestica]	NA	NA	NA	-	5.55206	9.56807	7.87248	16.0712	33.4625	25.6452
MD13G1205000	PREDICTED: auxin-responsive protein IAA14-like [Pyrus x bretschneideri]	04075(Plant hormone signal transduction)	K14484	NA	K14484,ko04075,Plant hormone signal transduction	4.77374	7.82473	4.74158	15.7259	15.2629	10.5853
MD13G1216700	PREDICTED: long-chain-alcohol oxidase FAO1 [Pyrus x bretschneideri]	NA	NA	NA	-	2.63242	6.90619	7.82644	24.4572	21.7546	14.2952
MD13G1219200	PREDICTED: heterogeneous nuclear ribonucleoprotein 1-like [Malus domestica]	03015(mRNA surveillance pathway)	K14411	NA	K14411,ko03015,mRNA surveillance pathway	44.8056	47.9396	44.2894	148.813	135.746	106.772
MD13G1221000	PREDICTED: UBP1-associated protein 2A-like [Malus domestica]	03040(Spliceosome)	K12741	NA	K12741,ko03040,Spliceosome	1.67413	0.222751	0.194057	6.68159	5.24898	6.68771
MD13G1230800	PREDICTED: chaperonin CPN60-2, mitochondrial-like [Pyrus x bretschneideri]	03018(RNA degradation)	K04077	NA	K04077,ko05134,Legionellosis;K04077,ko05152,Tuberculosis;K04077,ko03018,RNA degradation;K04077,ko04212,Longevity regulating pathway - worm;K04077,ko04940,Type I diabetes mellitus	0.964521	2.71575	2.46981	11.4789	36.7217	23.3047
MD13G1238300	PREDICTED: probable RNA helicase SDE3 [Malus domestica]	NA	NA	NA	-	1.18092	0.151634	0.183474	5.41197	1.8992	1.26841
MD13G1239300	PREDICTED: protein CHLOROPLAST IMPORT APPARATUS 2-like [Malus domestica]	04712(Circadian rhythm - plant)	K12130	NA	-	1.507	1.68224	0.791254	5.05044	5.13584	2.29262
MD13G1239700	PREDICTED: transcription factor bHLH35-like [Malus domestica]	04075(Plant hormone signal transduction)	K13422	NA	-	2.33414	0.769773	1.67654	13.8651	2.3463	3.50545
MD13G1244100	PREDICTED: probable splicing factor 3A subunit 1 [Fragaria vesca subsp. vesca]	03040(Spliceosome)	K12825	NA	K12825,ko03040,Spliceosome	29.4693	55.2596	53.7511	91.3329	139.624	107.813
MD13G1248200	PREDICTED: lysine--tRNA ligase, cytoplasmic-like [Malus domestica]	00970(Aminoacyl-tRNA biosynthesis)	K04567	EC:6.1.1.6	-	17.9665	21.3927	18.6612	66.4211	49.1384	50.0074
MD13G1250300	PREDICTED: E3 ubiquitin-protein ligase RNF14 isoform X1 [Pyrus x bretschneideri]	NA	NA	NA	-	9.87369	33.7144	27.3911	34.9738	124.641	60.5498
MD13G1258500	PREDICTED: PTI1-like tyrosine-protein kinase 1 isoform X1 [Pyrus x bretschneideri]	04626(Plant-pathogen interaction)	K13436	EC:2.7.11.1	-	24.7235	14.48	16.1675	138.927	130.875	103.258
MD13G1278500	PREDICTED: chitinase-like protein 1 [Malus domestica]	00520(Amino sugar and nucleotide sugar metabolism)	K01183	EC:3.2.1.14	-	1.50172	0.798146	0.700162	5.51786	1.28098	2.64651
MD13G1279900	PREDICTED: probable aldo-keto reductase 2 [Malus domestica]	00750(Vitamin B6 metabolism)	K05275	EC:1.1.1.65	-	119.9	122.308	142.832	333.515	328.476	270.585
MD13G1281800	PREDICTED: protein RALF-like 24 [Malus domestica]	NA	NA	NA	-	4.437	11.9655	10.6517	14.103	30.841	33.7928
MD14G1006600	PREDICTED: plant cysteine oxidase 2-like [Malus domestica]	00430(Taurine and hypotaurine metabolism)	K10712	EC:1.13.11.19	K10712,ko00430,Taurine and hypotaurine metabolism	28.8695	4.35843	2.65587	96.62	37.7827	37.4037
MD14G1010800	PREDICTED: NADH--cytochrome b5 reductase 1-like [Malus domestica]	00520(Amino sugar and nucleotide sugar metabolism)	K00326	EC:1.6.2.2	K00326,ko00520,Amino sugar and nucleotide sugar metabolism	35.8274	17.9658	21.5924	240.282	109.554	104.187
MD14G1019000	PREDICTED: IQ domain-containing protein IQM3 [Malus domestica]	NA	NA	NA	-	2.7809	0.812433	0.610882	7.87909	2.3558	2.0073
MD14G1020100	PREDICTED: solute carrier family 35 member F1-like [Pyrus x bretschneideri]	NA	NA	NA	-	3.64589	0.217655	0.330395	9.74583	0.747217	0.930464
MD14G1036000	PREDICTED: uncharacterized protein LOC103414920 [Malus domestica]	NA	NA	NA	-	3.55436	1.71617	1.63936	20.6692	13.6097	10.4961
MD14G1041000	PREDICTED: syntaxin-121-like [Malus domestica]	04130(SNARE interactions in vesicular transport)	K08486	NA	K08486,ko04721,Synaptic vesicle cycle;K08486,ko04130,SNARE interactions in vesicular transport	2.1452	0.560783	0.346053	7.02534	6.52253	2.63705
MD14G1043500	PREDICTED: 40S ribosomal protein S5 [Malus domestica]	03010(Ribosome)	K02989	NA	K02989,ko03010,Ribosome	7.23732	2.67301	3.51891	25.7074	20.1884	17.662
MD14G1043600	PREDICTED: fasciclin-like arabinogalactan protein 16 [Malus domestica]	NA	NA	NA	-	3.31306	3.94417	3.80534	10.8368	6.50656	10.6159
MD14G1050600	PREDICTED: F-box/kelch-repeat protein At2g44130-like [Pyrus x bretschneideri]	NA	NA	NA	-	1.7909	3.4045	4.8334	7.48301	14.8374	21.8477
MD14G1051200	PREDICTED: lipid phosphate phosphatase delta-like [Malus domestica]	00600(Sphingolipid metabolism)	K04716	EC:3.1.3.-	-	14.7006	3.99028	3.90116	146.192	31.0481	17.866
MD14G1055600	PREDICTED: uncharacterized protein LOC103430580 [Malus domestica]	NA	NA	NA	-	1.23357	0.861099	0.625148	4.15856	2.16149	1.60322
MD14G1062600	polygalacturonase inhibitor precursor [Malus domestica]	NA	NA	NA	-	39.5733	3.24138	6.48722	114.92	32.5092	19.7528
MD14G1069700	PREDICTED: calcium-dependent protein kinase 32-like [Malus domestica]	04626(Plant-pathogen interaction)	K13412	EC:2.7.11.1	K13412,ko05145,Toxoplasmosis;K13412,ko04626,Plant-pathogen interaction	48.5049	145.477	144.833	156.416	325.61	318.826
MD14G1084300	PREDICTED: LOW QUALITY PROTEIN: DEAD-box ATP-dependent RNA helicase 13 [Prunus mume]	03040(Spliceosome)	K12858	EC:3.6.4.13	-	5.05204	18.5403	17.6474	14.9826	70.3796	52.8611
MD14G1084900	PREDICTED: 40S ribosomal protein S10-1-like [Malus domestica]	03010(Ribosome)	K02947	NA	-	43.0342	10.9637	12.0895	122.661	35.049	34.6701
MD14G1088100	PREDICTED: ankyrin repeat-containing protein At5g02620-like [Malus domestica]	NA	NA	NA	-	0.895035	0.88892	0.663272	3.2492	3.09577	2.90285
MD14G1094000	PREDICTED: leucine-rich repeat receptor-like protein kinase PXC1 [Malus domestica]	04075(Plant hormone signal transduction)	K13415	EC:2.7.10.1;EC:2.7.11.1	-	0.928379	0.399169	0.320841	3.09969	1.80888	1.67596
MD14G1094100	PREDICTED: uncharacterized protein LOC103454716 [Malus domestica]	00240(Pyrimidine metabolism)	K09903	EC:2.7.4.22	-	9.21785	21.6316	19.5456	45.27	139.36	82.8326
MD14G1106500	aquaporin PIP1-3 [Malus domestica]	00531(Glycosaminoglycan degradation)	K10532	EC:2.3.1.78	-	1.11091	0.44651	0.648322	9.38428	1.11287	1.6959
MD14G1111400	PREDICTED: cylicin-1 [Malus domestica]	NA	NA	NA	-	9.05392	1.60519	0.61042	47.2802	51.2938	42.2691
MD14G1114400	-	NA	NA	NA	-	3.35123	9.4735	6.30678	11.5605	18.4391	16.1521
MD14G1119800	PREDICTED: probable inactive receptor kinase At4g23740 [Pyrus x bretschneideri]	04075(Plant hormone signal transduction)	K13415	EC:2.7.10.1;EC:2.7.11.1	-	0.51646	0.210128	0.3729	4.26231	1.86916	2.06913
MD14G1125900	PREDICTED: metal-nicotianamine transporter YSL1-like [Malus domestica]	01200(Carbon metabolism);01230(Biosynthesis of amino acids);00030(Pentose phosphate pathway);00710(Carbon fixation in photosynthetic organisms)	K01807	EC:5.3.1.6	-	32.9726	8.31587	4.02781	134.181	73.6514	56.9545
MD14G1132900	PREDICTED: protein ABIL2-like isoform X2 [Malus domestica]	NA	NA	NA	-	2.1459	0.2563	0.651248	9.85762	2.59713	2.95515
MD14G1150000	PREDICTED: uncharacterized protein LOC103409316 [Malus domestica]	04140(Regulation of autophagy)	K08332	NA	-	1.72973	1.72025	1.55789	4.72389	4.00491	3.38395
MD14G1162900	PREDICTED: nucleoside diphosphate kinase 2, chloroplastic [Malus domestica]	00230(Purine metabolism);00240(Pyrimidine metabolism)	K00940	EC:2.7.4.6	K00940,ko00230,Purine metabolism;K00940,ko00240,Pyrimidine metabolism	2.4785	0.365438	0.795912	8.52981	3.47184	2.43506
MD14G1168200	PREDICTED: E3 ubiquitin-protein ligase RGLG2-like [Malus domestica]	NA	NA	NA	-	17.6021	5.84941	6.0868	98.8948	38.446	30.5544
MD14G1171100	PREDICTED: pentatricopeptide repeat-containing protein At3g48250, chloroplastic-like [Malus domestica]	NA	NA	NA	-	1.47928	2.64253	3.25588	4.21669	11.0854	11.0062
MD14G1172500	amine oxidase 4 [Malus domestica]	00260(Glycine, serine and threonine metabolism);00350(Tyrosine metabolism);00360(Phenylalanine metabolism);00410(beta-Alanine metabolism);00950(Isoquinoline alkaloid biosynthesis);00960(Tropane, piperidine and pyridine alkaloid biosynthesis)	K00276	EC:1.4.3.21	-	0.678777	0.139159	0.101028	7.76912	1.08856	1.79777
MD14G1176800	PREDICTED: LRR receptor-like serine/threonine-protein kinase GSO1, partial [Pyrus x bretschneideri]	04626(Plant-pathogen interaction)	K13420	EC:2.7.11.1	-	3.20257	2.03901	1.38161	15.4943	16.9558	8.77511
MD14G1177200	PREDICTED: homeobox protein knotted-1-like 6 [Malus domestica]	NA	NA	NA	-	27.0069	13.0725	10.7559	141.054	91.812	60.1444
MD14G1180800	PREDICTED: LOW QUALITY PROTEIN: 60S acidic ribosomal protein P2B-like [Malus domestica]	03010(Ribosome)	K02943	NA	-	9.64134	10.8381	12.1791	25.3082	57.8401	39.916
MD14G1184200	PREDICTED: RING-H2 finger protein ATL46-like [Malus domestica]	NA	NA	NA	-	0.948777	1.44842	1.11221	6.27953	2.90317	4.96226
MD14G1185000	PREDICTED: nucleobase-ascorbate transporter 6 [Malus domestica]	NA	NA	NA	-	1.33235	0.354267	0.36742	5.99686	0.802699	1.0412
MD14G1186000	PREDICTED: LOW QUALITY PROTEIN: U-box domain-containing protein 38-like [Malus domestica]	04140(Regulation of autophagy)	K08332	NA	-	0.846941	0.595347	0.702349	5.29844	9.06318	3.95374
MD14G1197300	PREDICTED: F-box/kelch-repeat protein At1g74510 [Malus domestica]	NA	NA	NA	-	1.04298	0.668618	0.941399	3.73333	1.86692	1.6307
MD14G1201100	PREDICTED: geranylgeranyl diphosphate reductase, chloroplastic-like [Malus domestica]	00860(Porphyrin and chlorophyll metabolism);00900(Terpenoid backbone biosynthesis)	K10960	EC:1.3.1.83	K10960,ko00860,Porphyrin and chlorophyll metabolism;K10960,ko00900,Terpenoid backbone biosynthesis	7.88125	20.3963	31.6046	80.2372	150.095	94.762
MD14G1202700	PREDICTED: photosynthetic NDH subunit of subcomplex B 4, chloroplastic-like [Malus domestica]	NA	NA	NA	-	1.11203	2.04631	0.568024	13.4973	43.9108	18.5596
MD14G1204700	PREDICTED: two-component response regulator-like APRR1 [Malus domestica]	04712(Circadian rhythm - plant)	K12127	NA	-	28.3154	30.1116	25.6767	79.5288	91.5034	74.881
MD14G1210500	PREDICTED: protein LEO1 homolog isoform X4 [Malus domestica]	NA	NA	NA	-	37.5784	110.486	103.643	153.472	797.634	506.505
MD14G1214800	PREDICTED: protein COBRA-like [Malus domestica]	NA	NA	NA	-	6.31504	0.944233	0.818511	23.5976	2.53328	3.49201
MD14G1215700	PREDICTED: truncated transcription factor CAULIFLOWER A-like isoform X1 [Malus domestica]	03060(Protein export)	K03217	NA	-	5.75547	9.19075	12.9759	19.5684	28.3066	28.9644
MD14G1215900	PREDICTED: ADP,ATP carrier protein ER-ANT1-like [Malus domestica]	03015(mRNA surveillance pathway)	K14406	NA	K05863,ko04020,Calcium signaling pathway;K05863,ko04022,cGMP-PKG signaling pathway;K05863,ko05166,HTLV-I infection;K05863,ko05012,Parkinson's disease;K05863,ko05016,Huntington's disease	3.5291	8.73265	7.12536	9.67707	36.1543	21.9685
MD14G1217500	PREDICTED: uncharacterized protein LOC103455454 [Malus domestica]	NA	NA	NA	-	1.46743	0.255746	0.643651	9.81851	1.18469	1.38765
MD14G1220200	PREDICTED: DEAD-box ATP-dependent RNA helicase 51-like [Malus domestica]	03018(RNA degradation)	K12614	EC:3.6.4.13	-	2.49616	4.89171	6.47131	6.83558	20.4124	21.3564
MD14G1222200	PREDICTED: transcription factor DIVARICATA-like [Malus domestica]	NA	NA	NA	-	3.0355	1.63207	2.20311	35.5956	10.3812	4.24324
MD14G1226000	PREDICTED: uncharacterized protein LOC103431218 [Malus domestica]	NA	NA	NA	-	7.67014	10.8239	4.50944	26.3346	40.3871	20.6054
MD14G1226300	PREDICTED: ethylene-responsive transcription factor ERF118-like [Malus domestica]	04626(Plant-pathogen interaction)	K13434	NA	-	2.4056	2.2457	2.29093	17.727	28.6291	24.3349
MD14G1226700	PREDICTED: uncharacterized protein LOC103455597 [Malus domestica]	NA	NA	NA	-	92.2302	198.07	189.891	501.795	1448.24	827.903
MD14G1238700	PREDICTED: glutamine synthetase nodule isozyme-like [Pyrus x bretschneideri]	01230(Biosynthesis of amino acids);00630(Glyoxylate and dicarboxylate metabolism);00910(Nitrogen metabolism);00250(Alanine, aspartate and glutamate metabolism);00220(Arginine biosynthesis)	K01915	EC:6.3.1.2	K01915,ko02020,Two-component system;K01915,ko01230,Biosynthesis of amino acids;K01915,ko04727,GABAergic synapse;K01915,ko00220,Arginine biosynthesis;K01915,ko00630,Glyoxylate and dicarboxylate metabolism;K01915,ko00910,Nitrogen metabolism;K01915,ko00250,Alanine, aspartate and glutamate metabolism;K01915,ko04724,Glutamatergic synapse	6.24367	1.83279	1.38381	62.6401	5.92459	9.81196
MD14G1241600	PREDICTED: protein indeterminate-domain 14-like [Malus domestica]	00052(Galactose metabolism);00600(Sphingolipid metabolism);00531(Glycosaminoglycan degradation);00604(Glycosphingolipid biosynthesis - ganglio series);00511(Other glycan degradation)	K12309	EC:3.2.1.23	-	1.48102	0.922641	0.350371	11.318	8.56578	6.16142
MD14G1241800	PREDICTED: methylecgonone reductase-like [Malus domestica]	00040(Pentose and glucuronate interconversions);00051(Fructose and mannose metabolism);00052(Galactose metabolism);00561(Glycerolipid metabolism)	K00011	EC:1.1.1.21	-	2.99048	0.472922	0.343336	31.0879	3.37538	2.22389
MD14G1243900	PREDICTED: protein argonaute 1 [Malus domestica]	NA	NA	NA	-	17.8438	6.6911	7.4966	57.8021	26.591	21.0699
MD14G1244500	PREDICTED: rhodanese-like domain-containing protein 8, chloroplastic [Malus domestica]	NA	NA	NA	-	1.06201	1.20389	1.03008	8.00534	11.7013	6.40257
MD14G1245200	PREDICTED: uncharacterized protein LOC103455704 [Malus domestica]	NA	NA	NA	-	0.677173	0.433743	0.892196	8.27917	2.12935	2.54957
MD14G1246200	PREDICTED: putative GEM-like protein 8 [Malus domestica]	04141(Protein processing in endoplasmic reticulum);04120(Ubiquitin mediated proteolysis);03420(Nucleotide excision repair)	K03868	NA	-	3.53485	1.03251	0.787067	12.682	2.82684	1.58731
MD15G1000800	PREDICTED: uncharacterized protein LOC103450315 [Malus domestica]	NA	NA	NA	-	15.8804	15.3085	14.4973	50.1777	49.1813	40.7702
MD15G1011800	PREDICTED: tubulin beta chain [Malus domestica]	04145(Phagosome)	K07375	NA	K07375,ko04540,Gap junction;K07375,ko05130,Pathogenic Escherichia coli infection;K07375,ko04145,Phagosome	8.15217	5.43452	7.73182	27.8435	12.1632	21.5843
MD15G1012300	PREDICTED: gibberellin-regulated protein 1-like [Malus domestica]赤霉素GASA1	00563(Glycosylphosphatidylinositol(GPI)-anchor biosynthesis)	K03860	NA	-	2.06313	0	0.0571161	1810.42	68.8377	47.7033
MD15G1014400	PREDICTED: auxin response factor 5 [Malus domestica]	04075(Plant hormone signal transduction)	K14486	NA	-	1.28882	1.11529	0.9362	6.02407	2.51386	1.85168
MD15G1014500	PREDICTED: uncharacterized protein LOC103450397 [Malus domestica]	NA	NA	NA	-	2.31217	2.18932	1.97138	8.53612	6.1911	5.44839
MD15G1021700	PREDICTED: probable ubiquitin-conjugating enzyme E2 18 [Malus domestica]	04120(Ubiquitin mediated proteolysis)	K10688	EC:2.3.2.25	K10688,ko04120,Ubiquitin mediated proteolysis	8.43015	3.64202	2.52655	22.4309	12.2253	9.44147
MD15G1029200	PREDICTED: J domain-containing protein required for chloroplast accumulation response 1 [Malus domestica]	NA	NA	NA	-	0.568239	0.227987	0.165516	1.86187	1.07619	0.474196
MD15G1033900	PREDICTED: cytochrome P450 CYP82D47-like [Malus domestica]	00903(Limonene and pinene degradation);00945(Stilbenoid, diarylheptanoid and gingerol biosynthesis)	K00517	NA	-	6.64788	29.6471	16.7484	39.4412	144.147	134.2
MD15G1051500	PREDICTED: uncharacterized protein LOC103431272 [Malus domestica]	NA	NA	NA	-	2.68988	4.4565	4.27069	8.89794	20.1802	14.9113
MD15G1052100	PREDICTED: mechanosensitive ion channel protein 10-like [Malus domestica]	NA	NA	NA	-	2.53813	2.13233	1.59027	8.22219	14.0624	13.5332
MD15G1053900	PREDICTED: probable 28S rRNA (cytosine-C(5))-methyltransferase [Malus domestica]	NA	NA	NA	-	5.33135	2.08672	1.81792	17.617	10.427	6.34049
MD15G1056600	PREDICTED: uncharacterized protein LOC103455808 [Malus domestica]	NA	NA	NA	-	88.492	343.195	304.184	281.901	1300.81	1010.27
MD15G1066900	PREDICTED: lecithin-cholesterol acyltransferase-like 1 [Malus domestica]	00564(Glycerophospholipid metabolism)	K06129	EC:3.1.1.5	-	9.70481	4.54542	2.6539	59.2883	27.0644	15.3328
MD15G1067000	PREDICTED: uncharacterized protein LOC103455873 [Malus domestica]	NA	NA	NA	-	3.00815	2.19747	0.940839	28.9987	163.882	96.8126
MD15G1067100	PREDICTED: 70 kDa peptidyl-prolyl isomerase-like [Malus domestica]	01200(Carbon metabolism);00630(Glyoxylate and dicarboxylate metabolism);00260(Glycine, serine and threonine metabolism)	K00281	EC:1.4.4.2	K09571,ko04915,Estrogen signaling pathway	8.1747	28.1029	26.8931	50.4368	307.245	175.835
MD15G1070800	PREDICTED: calcium-transporting ATPase 1, chloroplastic-like isoform X1 [Malus domestica]	04140(Regulation of autophagy)	K08332	NA	-	2.46748	0.868927	0.674715	6.75097	2.94467	3.2798
MD15G1073300	PREDICTED: 3-oxo-Delta(4,5)-steroid 5-beta-reductase-like [Malus domestica]	NA	NA	NA	-	245.215	179.047	173.828	655.626	669.394	503.496
MD15G1073500	PREDICTED: 3-oxo-Delta(4,5)-steroid 5-beta-reductase-like [Malus domestica]	00040(Pentose and glucuronate interconversions);00500(Starch and sucrose metabolism)	K01184	EC:3.2.1.15	-	2.64614	3.12601	0.798508	11.0309	18.9606	12.8257
MD15G1095700	PREDICTED: LOW QUALITY PROTEIN: U-box domain-containing protein 26 [Malus domestica]	NA	NA	NA	-	1.65295	1.34054	1.73016	6.50347	5.46733	13.6583
MD15G1096800	hypothetical protein PRUPE_ppa010813mg [Prunus persica]	01200(Carbon metabolism);01210(2-Oxocarboxylic acid metabolism);01230(Biosynthesis of amino acids);00710(Carbon fixation in photosynthetic organisms);00250(Alanine, aspartate and glutamate metabolism);00270(Cysteine and methionine metabolism);00220(Arginine biosynthesis);00330(Arginine and proline metabolism);00350(Tyrosine metabolism);00360(Phenylalanine metabolism);00400(Phenylalanine, tyrosine…	K14454	EC:2.6.1.1	-	1.70879	0.850704	1.04431	7.62635	2.70438	1.7694
MD15G1099500	PREDICTED: two-on-two hemoglobin-3 [Malus domestica]	NA	NA	NA	-	4.65193	2.52243	6.2786	18.1282	16.4038	31.313
MD15G1106400	PREDICTED: probable sarcosine oxidase [Malus domestica]	00260(Glycine, serine and threonine metabolism);00310(Lysine degradation);04146(Peroxisome)	K00306	EC:1.5.3.1;EC:1.5.3.7	K00306,ko00260,Glycine, serine and threonine metabolism;K00306,ko00310,Lysine degradation;K00306,ko04146,Peroxisome	2.31744	7.62834	7.24759	31.1547	36.2174	23.8007
MD15G1107100	PREDICTED: uncharacterized protein LOC103456090 [Malus domestica]	NA	NA	NA	-	151.728	341.79	324.829	450.333	908.798	641.711
MD15G1125300	PREDICTED: protein WVD2-like 5 isoform X2 [Malus domestica]	NA	NA	NA	-	31.1159	48.4254	46.8961	132.758	228.733	240.326
MD15G1126900	PREDICTED: vesicle-associated membrane protein 711 [Malus domestica]	04130(SNARE interactions in vesicular transport)	K08515	NA	K08515,ko04130,SNARE interactions in vesicular transport	8.51985	6.46204	6.11779	24.6717	19.4398	15.3398
MD15G1127000	PREDICTED: protein FAR1-RELATED SEQUENCE 6-like [Malus domestica]	NA	NA	NA	-	1.21343	1.83547	1.39721	3.56676	12.6918	5.33405
MD15G1129500	PREDICTED: mitochondrial inner membrane protease ATP23 [Malus domestica]	04144(Endocytosis)	K12492	NA	-	2.70856	4.15176	3.94851	10.2627	19.7392	11.5639
MD15G1133100	PREDICTED: UDP-sugar pyrophosphorylase [Malus domestica]	00040(Pentose and glucuronate interconversions);00052(Galactose metabolism);00053(Ascorbate and aldarate metabolism);00520(Amino sugar and nucleotide sugar metabolism)	K12447	EC:2.7.7.64	K12447,ko00040,Pentose and glucuronate interconversions;K12447,ko00052,Galactose metabolism;K12447,ko00520,Amino sugar and nucleotide sugar metabolism;K12447,ko00053,Ascorbate and aldarate metabolism	18.1625	8.54937	7.95934	78.1608	34.5266	22.8532
MD15G1137200	PREDICTED: aldehyde dehydrogenase family 3 member H1-like [Malus domestica]	00010(Glycolysis / Gluconeogenesis);00040(Pentose and glucuronate interconversions);00053(Ascorbate and aldarate metabolism);00620(Pyruvate metabolism);00071(Fatty acid degradation);00561(Glycerolipid metabolism);00280(Valine, leucine and isoleucine degradation);00310(Lysine degradation);00330(Arginine and proline metabolism);00340(Histidine metabolism);00380(Tryptophan metabolism);00410(beta-Ala…	K00128	EC:1.2.1.3	-	2.82423	6.1818	3.8764	32.4185	22.3741	13.6336
MD15G1137600	PREDICTED: uncharacterized protein LOC103431352 [Malus domestica]	NA	NA	NA	-	9.37806	2.63047	1.70867	32.403	6.79665	4.52803
MD15G1146100	PREDICTED: dual specificity protein kinase shkC-like isoform X1 [Malus domestica]	04075(Plant hormone signal transduction)	K14510	EC:2.7.11.1	-	1.43385	0.437493	0.390911	9.56021	4.5624	2.32814
MD15G1148100	PREDICTED: probable phosphoinositide phosphatase SAC9 [Malus domestica]	03010(Ribosome)	K02932	NA	-	11.0708	5.91078	4.52978	32.5656	11.2164	10.4229
MD15G1149600	PREDICTED: uncharacterized protein LOC103431448 [Malus domestica]	NA	NA	NA	-	1.72599	1.14682	0.881556	5.25428	2.90418	1.76915
MD15G1152200	PREDICTED: probable purine permease 5 [Malus domestica]	NA	NA	NA	-	9.4935	1.46948	0.958597	25.1317	4.37507	3.85181
MD15G1152700	PREDICTED: omega-6 fatty acid desaturase, chloroplastic [Pyrus x bretschneideri]	NA	NA	NA	K10255,ko02020,Two-component system	6.97767	2.77079	2.67446	20.7061	5.26738	7.2465
MD15G1155500	PREDICTED: temperature-induced lipocalin-1-like [Malus domestica]	NA	NA	NA	-	11.1587	9.10844	7.98428	31.3009	36.9098	30.7035
MD15G1165600	PREDICTED: putative clathrin assembly protein At5g35200 [Malus domestica]	01210(2-Oxocarboxylic acid metabolism);01230(Biosynthesis of amino acids);00290(Valine, leucine and isoleucine biosynthesis);00770(Pantothenate and CoA biosynthesis)	K01687	EC:4.2.1.9	-	15.8871	12.1026	11.699	72.7574	45.9259	35.7726
MD15G1173500	PREDICTED: beta-glucuronosyltransferase GlcAT14B-like [Malus domestica]	00601(Glycosphingolipid biosynthesis - lacto and neolacto series)	K00742	EC:2.4.1.150	-	1.98858	0.293854	0.450373	6.65308	1.18367	0.915316
MD15G1183500	PREDICTED: pentatricopeptide repeat-containing protein At5g21222-like [Malus domestica]	NA	NA	NA	-	5.13688	6.54176	3.79372	39.8738	32.2037	23.6515
MD15G1188400	PREDICTED: leucine-rich repeat extensin-like protein 4 [Pyrus x bretschneideri]	03010(Ribosome)	K02984	NA	-	3.98375	0.180925	0.328374	46.4961	3.15996	4.58118
MD15G1189200	PREDICTED: fe-S cluster assembly factor HCF101, chloroplastic [Malus domestica]	NA	NA	NA	-	4.57604	3.69766	1.76546	16.733	9.83743	6.68771
MD15G1190400	PREDICTED: uncharacterized protein LOC103929412 [Pyrus x bretschneideri]	NA	NA	NA	-	27.2342	79.8121	77.7526	78.4563	279.644	189.701
MD15G1205100	PREDICTED: 1-aminocyclopropane-1-carboxylate oxidase 1 [Malus domestica]	00270(Cysteine and methionine metabolism)	K05933	EC:1.14.17.4	-	52.8882	5.86259	13.1282	3426.83	1798.87	1577.05
MD15G1211100	single myb histone 3-like [Malus domestica]	NA	NA	NA	-	14.0301	36.0774	28.4549	49.7109	95.9034	77.1181
MD15G1217600	PREDICTED: tubulin--tyrosine ligase-like protein 12 [Malus domestica]	NA	NA	NA	-	2.70572	4.87792	5.83315	11.0088	17.0418	15.3832
MD15G1221000	PREDICTED: beta-galactosidase 15-like [Malus domestica]	00052(Galactose metabolism);00600(Sphingolipid metabolism);00531(Glycosaminoglycan degradation);00604(Glycosphingolipid biosynthesis - ganglio series);00511(Other glycan degradation)	K12309	EC:3.2.1.23	-	2.59475	2.33411	1.51298	12.1117	5.73835	5.72925
MD15G1221400	PREDICTED: auxin response factor 19-like isoform X2 [Malus domestica]	04075(Plant hormone signal transduction)	K14486	NA	-	1.56941	0.947308	0.504339	9.75566	1.90792	1.6448
MD15G1222300	PREDICTED: uncharacterized protein LOC103400907 [Malus domestica]	NA	NA	NA	-	1.62597	1.41537	1.30156	9.30925	5.77252	9.64225
MD15G1223500	PREDICTED: sucrose synthase [Malus domestica]	00500(Starch and sucrose metabolism)	K00695	EC:2.4.1.13	K00695,ko00500,Starch and sucrose metabolism	24.0772	9.12938	9.08088	94.6966	24.6639	18.6184
MD15G1226500	PREDICTED: probable L-type lectin-domain containing receptor kinase S.5 [Malus domestica]	00500(Starch and sucrose metabolism)	K01176	EC:3.2.1.1	-	0.869014	0.868942	0.793059	3.22315	6.11282	4.23209
MD15G1228200	PREDICTED: plant intracellular Ras-group-related LRR protein 4-like [Pyrus x bretschneideri]	NA	NA	NA	-	6.52615	3.00311	3.28358	23.4428	10.0827	8.59809
MD15G1229200	glutamate receptor [Malus hupehensis]	NA	NA	NA	-	2.0539	0.992383	0.972619	5.53954	1.79884	2.37818
MD15G1231700	PREDICTED: HMG1/2-like protein [Malus domestica]	03410(Base excision repair)	K10802	NA	-	5.42962	26.8803	28.4328	14.6286	96.8843	81.8753
MD15G1237400	PREDICTED: uncharacterized protein LOC103411216 [Malus domestica]	NA	NA	NA	-	15.9584	17.4842	15.1056	62.512	37.9348	49.4759
MD15G1244400	PREDICTED: cold shock protein 1-like [Malus domestica]	03013(RNA transport)	K14310	NA	-	13.2166	21.3208	22.3131	39.2372	79.0815	57.9097
MD15G1244500	PREDICTED: ferredoxin--NADP reductase, leaf isozyme, chloroplastic [Malus domestica]	00195(Photosynthesis)	K02641	EC:1.18.1.2	K02641,ko00195,Photosynthesis	13.4989	6.36219	2.749	40.1797	15.9833	8.06523
MD15G1246300	PREDICTED: uncharacterized RNA-binding protein C17H9.04c-like isoform X2 [Malus domestica]	00920(Sulfur metabolism);00230(Purine metabolism);00450(Selenocompound metabolism);00261(Monobactam biosynthesis)	K13811	EC:2.7.7.4;EC:2.7.1.25	-	7.59348	4.32115	3.00678	31.0328	18.7683	10.7606
MD15G1247400	PREDICTED: histone H1-like [Malus domestica]	NA	NA	NA	-	54.2835	120.01	115.592	182.315	503.559	429.537
MD15G1256700	PREDICTED: lipid phosphate phosphatase epsilon 2, chloroplastic [Malus domestica]	00510(N-Glycan biosynthesis)	K07252	EC:3.6.1.43	-	9.84382	3.29903	2.87407	28.7003	8.36779	5.12144
MD15G1263000	PREDICTED: scarecrow-like protein 4 [Malus domestica]	04075(Plant hormone signal transduction)	K14494	NA	-	3.08208	0.366435	0.483686	14.9072	1.10703	1.17487
MD15G1271400	PREDICTED: BTB/POZ domain-containing protein At3g50780-like [Malus domestica]	NA	NA	NA	-	0.61016	0.269881	0.0851871	2.09972	0.655808	0.403226
MD15G1277700	PREDICTED: probable disease resistance protein At5g66900 [Malus domestica]	04075(Plant hormone signal transduction)	K13415	EC:2.7.10.1;EC:2.7.11.1	-	1.13132	0.511913	0.566314	8.52058	33.8211	20.0273
MD15G1279200	PREDICTED: uncharacterized protein LOC103401340 isoform X1 [Malus domestica]	04075(Plant hormone signal transduction)	K14491	NA	-	2.36516	9.47202	6.57641	15.3108	41.3053	37.271
MD15G1279500	PREDICTED: LOB domain-containing protein 36 [Malus domestica]	00511(Other glycan degradation)	K01227	EC:3.2.1.96	-	0.870269	0.20192	0.17591	6.90782	2.54681	1.66166
MD15G1284300	PREDICTED: CLK4-associating serine/arginine rich protein isoform X2 [Malus domestica]	NA	NA	NA	-	3.5946	5.88879	6.26945	10.6951	16.2344	17.218
MD15G1291700	hypothetical protein PRUPE_ppa011163mg [Prunus persica]	NA	NA	NA	-	9.86527	4.0837	4.68796	41.4348	50.4473	58.9026
MD15G1292200	PREDICTED: suppressor of RPS4-RLD 1 [Malus domestica]	NA	NA	NA	-	11.4625	10.2472	10.3057	31.5363	38.162	30.5529
MD15G1292300	PREDICTED: suppressor of RPS4-RLD 1 [Malus domestica]	NA	NA	NA	-	11.3939	11.4545	11.4857	32.5675	42.5993	35.9128
MD15G1296800	-	NA	NA	NA	-	2.47618	1.05805	0.672115	15.9681	21.576	23.6811
MD15G1297000	PREDICTED: adenylyl-sulfate kinase 3 isoform X4 [Malus domestica]	00920(Sulfur metabolism);00230(Purine metabolism)	K00860	EC:2.7.1.25	K00860,ko00230,Purine metabolism;K00860,ko00920,Sulfur metabolism	2.07889	2.22465	1.87093	7.84678	6.82065	8.10692
MD15G1303500	PREDICTED: probable xyloglucan endotransglucosylase/hydrolase protein 6 [Pyrus x bretschneideri]	04075(Plant hormone signal transduction)	K14504	EC:2.4.1.207	-	243.957	20.1827	26.8847	652.303	272.212	343.602
MD15G1311400	PREDICTED: nucleobase-ascorbate transporter 11-like isoform X1 [Malus domestica]	NA	NA	NA	-	1.01239	0.457818	0.694957	5.22311	1.23379	1.87246
MD15G1316800	PREDICTED: E3 ubiquitin-protein ligase ATL31-like [Malus domestica]	00563(Glycosylphosphatidylinositol(GPI)-anchor biosynthesis)	K05283	EC:2.3.-.-	-	1.05238	0.499965	0.927588	4.71771	14.6847	12.7098
MD15G1320800	PREDICTED: lanC-like protein GCL1 [Malus domestica]	NA	NA	NA	-	1.57908	1.13899	0.685142	6.23555	11.1463	5.54734
MD15G1323900	PREDICTED: BTB/POZ domain-containing protein DOT3-like [Pyrus x bretschneideri]	00902(Monoterpenoid biosynthesis)	K15095	EC:1.1.1.208	-	0.757052	0.293016	0.290081	35.1301	7.10189	1.71032
MD15G1325200	PREDICTED: uncharacterized protein LOC103401657 isoform X1 [Malus domestica]	NA	NA	NA	-	0.901505	1.8946	2.57371	3.06967	4.56492	5.43426
MD15G1325300	PREDICTED: LOW QUALITY PROTEIN: putative uncharacterized protein DDB_G0281733 [Malus domestica]	NA	NA	NA	-	6.32174	7.07707	6.46933	17.0643	22.2114	30.1069
MD15G1329000	PREDICTED: bifunctional aspartate aminotransferase and glutamate/aspartate-prephenate aminotransferase-like [Malus domestica]	01230(Biosynthesis of amino acids);00350(Tyrosine metabolism);00360(Phenylalanine metabolism);00400(Phenylalanine, tyrosine and tryptophan biosynthesis);00950(Isoquinoline alkaloid biosynthesis);00960(Tropane, piperidine and pyridine alkaloid biosynthesis)	K15849	EC:2.6.1.1;EC:2.6.1.78	K15849,ko00960,Tropane, piperidine and pyridine alkaloid biosynthesis;K15849,ko00950,Isoquinoline alkaloid biosynthesis;K15849,ko00360,Phenylalanine metabolism;K15849,ko00350,Tyrosine metabolism;K15849,ko00400,Phenylalanine, tyrosine and tryptophan biosynthesis;K15849,ko01230,Biosynthesis of amino acids	93.0478	27.8732	24.666	285.082	66.1341	45.666
MD15G1332000	PREDICTED: UBP1-associated protein 2A-like [Malus domestica]	03040(Spliceosome)	K12741	NA	K12741,ko03040,Spliceosome	81.6346	345.588	300.968	405.563	2129.05	1637.46
MD15G1357900	PREDICTED: nitrate reductase [NADH] [Malus domestica]	00910(Nitrogen metabolism)	K10534	EC:1.7.1.1;EC:1.7.1.2	-	48.4018	14.4467	9.0883	266.79	122.305	74.0664
MD15G1359400	PREDICTED: auxin response factor 17 [Malus domestica]	04075(Plant hormone signal transduction)	K14486	NA	-	1.26528	1.28498	2.38079	5.8111	5.44897	4.12762
MD15G1364600	PREDICTED: pollen-specific protein C13-like [Malus domestica]	NA	NA	NA	-	13.9971	1.57024	1.13998	43.0055	3.3857	5.03869
MD15G1365400	PREDICTED: 3-ketoacyl-CoA synthase 6-like [Malus domestica]	00062(Fatty acid elongation)	K15397	EC:2.3.1.199	-	1.55179	1.90221	1.15552	10.1023	6.65563	4.14252
MD15G1366300	PREDICTED: F-box protein At1g22220-like [Malus domestica]	NA	NA	NA	-	4.26825	7.9252	6.44493	14.6334	66.2134	25.5008
MD15G1373000	PREDICTED: serine/threonine-protein kinase SAPK2-like [Malus domestica]	04075(Plant hormone signal transduction)	K14498	EC:2.7.11.1	K14498,ko04075,Plant hormone signal transduction	10.2677	10.0539	10.2337	36.3129	33.3326	24.2763
MD15G1381900	PREDICTED: cyclin-D2-1-like [Malus domestica]	04075(Plant hormone signal transduction)	K14505	NA	-	0.86968	0.871411	0.926357	3.9124	5.41797	7.41593
MD15G1382300	PREDICTED: uncharacterized protein LOC103401973 isoform X1 [Malus domestica]	NA	NA	NA	-	0.341589	0.0276719	0.160716	1.22379	0.271696	0.500483
MD15G1384500	dormancy-associated MADS box 1 protein [Malus domestica]	03060(Protein export)	K03217	NA	-	12.1509	3.00471	3.41582	48.1735	8.05712	6.82462
MD15G1392600	PREDICTED: protein odr-4 homolog [Malus domestica]	NA	NA	NA	-	5.42552	0.46428	0.710238	16.988	2.07889	1.7394
MD15G1395200	PREDICTED: uncharacterized protein LOC103416271 [Malus domestica]	03040(Spliceosome)	K12662	NA	-	3.37616	4.88667	5.62272	8.91924	28.1797	23.9715
MD15G1401000	PREDICTED: uncharacterized protein LOC103446281 isoform X1 [Malus domestica]	NA	NA	NA	-	1.56265	0.850823	0.772109	4.3886	2.16877	1.59378
MD15G1402100	PREDICTED: RHOMBOID-like protein 1 isoform X2 [Malus domestica]	00240(Pyrimidine metabolism);00760(Nicotinate and nicotinamide metabolism)	K01240	EC:3.2.2.3	-	4.3437	43.4848	36.6296	12.5731	109.015	72.6726
MD15G1405100	constitutive photomorphogenic 1 [Malus domestica]	04120(Ubiquitin mediated proteolysis);04712(Circadian rhythm - plant)	K10143	EC:2.3.2.27	-	4.17302	3.18906	3.57263	12.5432	7.8487	7.85619
MD15G1405200	constitutive photomorphogenic 1 [Malus domestica]	04120(Ubiquitin mediated proteolysis);04712(Circadian rhythm - plant)	K10143	EC:2.3.2.27	-	3.07203	3.90083	3.85461	9.37259	8.21109	9.17825
MD15G1405900	PREDICTED: patellin-3-like [Malus domestica]	NA	NA	NA	-	33.2572	50.9791	57.0329	163.622	292.379	253.526
MD15G1406000	PREDICTED: patellin-3-like [Malus domestica]	NA	NA	NA	-	7.19168	13.6031	8.43874	75.4269	189.344	112.091
MD15G1407600	RecName: Full=Phloretin 2'-O-glucosyltransferase; AltName: Full=Phloretin glucosyltransferase 1; Short=MdPGT1; AltName: Full=UDP-glucose:phloretin 2'-O-glucosyltransferase; AltName: Full=UDP-glycosyltransferase 88F1	00942(Anthocyanin biosynthesis)	K12938	EC:2.4.1.-	-	332.247	1289.4	1067.52	1067.2	3403.71	3874.56
MD15G1410800	PREDICTED: NAD(P)H-quinone oxidoreductase subunit T, chloroplastic [Malus domestica]	04141(Protein processing in endoplasmic reticulum)	K09517	NA	-	2.13549	4.60586	2.35479	9.3734	14.2331	5.66109
MD15G1411200	MYB transcription factor 3, partial [Malus domestica]	00196(Photosynthesis - antenna proteins)	K08917	NA	-	0.443806	0.0845784	0.0307015	33.3039	38.5991	17.6682
MD15G1411600	PREDICTED: chlorophyll a-b binding protein CP24 10A, chloroplastic-like [Malus domestica]	NA	NA	NA	K08917,ko00196,Photosynthesis - antenna proteins	21.6894	29.8351	11.7103	223.994	136.351	75.8663
MD15G1411700	PREDICTED: probable protein phosphatase 2C 62 isoform X2 [Pyrus x bretschneideri]	00561(Glycerolipid metabolism)	K01054	EC:3.1.1.23	-	4.36932	5.5193	4.507	13.9293	12.5878	9.01529
MD15G1415700	NAC domain-containing protein 104-like [Malus domestica]	NA	NA	NA	-	1.8554	0.572172	0.228465	30.8913	18.258	24.7588
MD15G1425400	PREDICTED: importin-4-like [Pyrus x bretschneideri]	00195(Photosynthesis)	K02639	NA	-	2.79217	1.40792	1.49805	12.0992	8.05677	5.47681
MD15G1428700	PREDICTED: ferredoxin-like [Malus domestica]	00500(Starch and sucrose metabolism)	K01176	EC:3.2.1.1	K02639,ko00195,Photosynthesis	107.258	145.526	57.9596	1180.42	669.329	382.752
MD15G1440600	PREDICTED: pentatricopeptide repeat-containing protein At3g62890-like [Malus domestica]	04141(Protein processing in endoplasmic reticulum)	K16196	EC:2.7.11.1	-	0.728719	1.90997	1.9841	1.98021	5.52388	3.81954
MD16G1006500	PREDICTED: BUD13 homolog [Malus domestica]	00052(Galactose metabolism);00600(Sphingolipid metabolism);00531(Glycosaminoglycan degradation);00604(Glycosphingolipid biosynthesis - ganglio series);00511(Other glycan degradation)	K12309	EC:3.2.1.23	-	40.3414	95.7911	80.4413	119.945	386.518	364.284
MD16G1009500	PREDICTED: protein indeterminate-domain 5, chloroplastic-like [Malus domestica]	00260(Glycine, serine and threonine metabolism);00350(Tyrosine metabolism);00360(Phenylalanine metabolism);00410(beta-Alanine metabolism);00950(Isoquinoline alkaloid biosynthesis);00960(Tropane, piperidine and pyridine alkaloid biosynthesis)	K00276	EC:1.4.3.21	-	2.97019	1.83925	1.60233	7.85987	5.32499	4.06114
MD16G1015600	PREDICTED: G-type lectin S-receptor-like serine/threonine-protein kinase At5g24080 [Pyrus x bretschneideri]	NA	NA	NA	-	1.65155	0.5793	0.304239	14.2611	9.31839	7.85806
MD16G1037500	PREDICTED: uncharacterized protein LOC103402658 [Malus domestica]	NA	NA	NA	-	2.64475	1.80994	1.51931	20.6936	13.5631	11.6619
MD16G1041100	PREDICTED: universal stress protein YxiE [Malus domestica]	NA	NA	NA	-	116.733	106.962	97.7353	320.669	356.893	319.302
MD16G1042800	PREDICTED: uncharacterized protein LOC103947586 [Pyrus x bretschneideri]	NA	NA	NA	-	1.20785	1.22421	1.71288	7.11653	3.61436	4.75034
MD16G1043100	PREDICTED: protein FLX-like 3 [Malus domestica]	04144(Endocytosis)	K19476	NA	-	13.6426	36.5265	35.5749	38.3369	150.759	104.997
MD16G1044700	PREDICTED: uncharacterized protein LOC103402715 [Malus domestica]	04075(Plant hormone signal transduction)	K14431	NA	-	1.27123	0.258164	0.249899	21.648	20.5057	8.09334
MD16G1046000	PREDICTED: transcription factor HBP-1b(c38) [Malus domestica]	NA	NA	NA	K14431,ko04075,Plant hormone signal transduction	0.589308	0.446622	0.216162	1.86722	2.43994	1.96559
MD16G1046800	PREDICTED: mediator of RNA polymerase II transcription subunit 25 isoform X1 [Pyrus x bretschneideri]	NA	NA	NA	-	9.18107	11.4688	10.3021	25.2831	28.3918	18.7546
MD16G1047200	PREDICTED: mediator of RNA polymerase II transcription subunit 25 isoform X2 [Pyrus x bretschneideri]	03013(RNA transport)	K14317	NA	-	13.4475	11.9521	11.153	65.1341	45.9596	25.242
MD16G1047300	PREDICTED: uncharacterized protein LOC103402722 [Malus domestica]	04626(Plant-pathogen interaction)	K13434	NA	-	1.77567	1.23963	2.18209	5.64766	22.329	21.499
MD16G1047700	PREDICTED: AP2/ERF and B3 domain-containing transcription factor RAV1 [Malus domestica]	00130(Ubiquinone and other terpenoid-quinone biosynthesis)	K14759	EC:5.4.4.2;EC:2.2.1.9	-	5.61273	3.6946	1.66974	17.2492	10.9769	6.68218
MD16G1052600	PHYLLO [Malus domestica]	04075(Plant hormone signal transduction);04626(Plant-pathogen interaction)	K13416	EC:2.7.10.1;EC:2.7.11.1	-	0.375679	0.042259	0.0153398	1.26121	0.422898	0.210185
MD16G1057000	PREDICTED: protein NSP-INTERACTING KINASE 2-like [Malus domestica]	NA	NA	NA	-	0.386133	0.290446	0.458392	2.02597	0.753469	0.964972
MD16G1058700	PREDICTED: protein BIG GRAIN 1-like E [Malus domestica]	NA	NA	NA	-	4.88409	21.6234	30.4006	19.0533	39.2743	94.4965
MD16G1059900	PREDICTED: protein SPIRAL1-like 1 [Malus domestica]	NA	NA	NA	-	121.3	27.5852	34.1615	373.419	85.5364	85.5198
MD16G1064200	PREDICTED: hornerin [Malus domestica]	NA	NA	NA	-	131.35	692.441	776.61	401.43	2537.79	2476.62
MD16G1075100	PREDICTED: uncharacterized protein LOC103402904 [Malus domestica]	NA	NA	NA	-	2.4681	5.82022	5.77826	7.19706	25.3859	18.3822
MD16G1075200	PREDICTED: uncharacterized protein LOC103402910 [Malus domestica]	00750(Vitamin B6 metabolism)	K05275	EC:1.1.1.65	-	3.95588	0.151699	0.440527	26.5642	6.07239	14.5872
MD16G1076000	homeobox-leucine zipper protein ATHB-13-like [Malus domestica]	NA	NA	NA	-	6.80772	2.44127	3.62774	33.3255	7.5625	11.7973
MD16G1078400	PREDICTED: hypersensitive-induced response protein 2 isoform X1 [Malus domestica]	04712(Circadian rhythm - plant)	K12115	NA	-	123.005	207.947	203.41	1212.37	2115.47	1543.52
MD16G1078900	PREDICTED: protein TWIN LOV 1 [Pyrus x bretschneideri]	NA	NA	NA	-	3.60189	4.40101	4.2887	23.1904	27.6512	14.6375
MD16G1081000	PREDICTED: tetratricopeptide repeat protein 38 [Malus domestica]	03040(Spliceosome);04141(Protein processing in endoplasmic reticulum);04144(Endocytosis)	K03283	NA	-	11.9202	4.20565	4.2654	103.743	37.1055	33.0326
MD16G1082300	PREDICTED: TMV resistance protein N-like [Malus domestica]	00564(Glycerophospholipid metabolism);00565(Ether lipid metabolism);04144(Endocytosis)	K01115	EC:3.1.4.4	-	0.579951	0.555057	0.296298	1.65067	1.17134	0.723395
MD16G1082400	PREDICTED: TMV resistance protein N-like [Malus domestica]	NA	NA	NA	-	3.69969	2.13929	2.24932	10.858	7.91156	4.40288
MD16G1082600	PREDICTED: uncharacterized protein LOC103439013 [Malus domestica]	03040(Spliceosome);04141(Protein processing in endoplasmic reticulum);04144(Endocytosis)	K03283	NA	-	8.64063	4.40747	4.77733	48.3657	28.8446	18.631
MD16G1082700	PREDICTED: TMV resistance protein N-like [Malus domestica]	NA	NA	NA	-	6.81832	5.75113	4.84357	41.0141	41.4151	27.0169
MD16G1089700	PREDICTED: uncharacterized protein LOC103402994 isoform X1 [Malus domestica]	NA	NA	NA	-	0.616873	0.602303	0.437265	9.27564	4.00105	5.94188
MD16G1090100	PREDICTED: putative potassium transporter 12 [Malus domestica]	NA	NA	NA	-	2.67363	2.20887	1.70251	9.27124	4.72558	4.6198
MD16G1092200	PREDICTED: dual-specificity RNA methyltransferase RlmN-like [Malus domestica]	NA	NA	NA	-	1.04654	0.327589	0.46376	3.1792	1.28657	1.22941
MD16G1094200	PREDICTED: probable nucleoredoxin 1 [Malus domestica]	00040(Pentose and glucuronate interconversions);00051(Fructose and mannose metabolism);00052(Galactose metabolism);00561(Glycerolipid metabolism)	K00011	EC:1.1.1.21	-	1.46517	0.967809	1.09975	5.39279	3.18866	3.1203
MD16G1101500	PREDICTED: non-functional NADPH-dependent codeinone reductase 2-like [Malus domestica]	NA	NA	NA	-	2.5524	0.353209	0.961597	7.8776	1.38386	1.9564
MD16G1107500	PREDICTED: regulator of G-protein signaling 1-like [Malus domestica]	01200(Carbon metabolism);01230(Biosynthesis of amino acids);00010(Glycolysis / Gluconeogenesis);00710(Carbon fixation in photosynthetic organisms)	K00134	EC:1.2.1.12	-	7.24299	1.44299	1.46663	28.8941	12.7621	6.77253
MD16G1111100	PREDICTED: glyceraldehyde-3-phosphate dehydrogenase, cytosolic [Malus domestica]	NA	NA	NA	K00134,ko01200,Carbon metabolism;K00134,ko01230,Biosynthesis of amino acids;K00134,ko04066,HIF-1 signaling pathway;K00134,ko05010,Alzheimer's disease;K00134,ko00710,Carbon fixation in photosynthetic organisms;K00134,ko00010,Glycolysis / Gluconeogenesis	373.165	66.9576	79.905	1024.82	179.98	159.948
MD16G1117600	PREDICTED: F-box/kelch-repeat protein At1g67480 [Malus domestica]	NA	NA	NA	-	6.10807	4.05933	3.32324	34.2723	7.89301	10.7394
MD16G1119400	PREDICTED: F-box protein At1g67340-like [Malus domestica]	NA	NA	NA	-	4.56948	1.63505	1.06423	16.1273	43.6474	18.9669
MD16G1140300	PREDICTED: probable boron transporter 2 [Malus domestica]	04141(Protein processing in endoplasmic reticulum);04145(Phagosome)	K08054	NA	-	0.990786	0.108436	0.188936	5.27917	0.606046	0.804094
MD16G1144800	PREDICTED: calnexin homolog [Malus domestica]	NA	NA	NA	K08054,ko04612,Antigen processing and presentation;K08054,ko04141,Protein processing in endoplasmic reticulum;K08054,ko04145,Phagosome;K08054,ko04918,Thyroid hormone synthesis;K08054,ko05166,HTLV-I infection	26.3394	43.451	38.6562	72.4373	96.4386	84.0885
MD16G1150300	PREDICTED: uncharacterized protein LOC103403519 [Malus domestica]	NA	NA	NA	-	1.31591	2.55893	2.17977	6.54236	8.6713	6.72628
MD16G1154700	PREDICTED: uncharacterized protein LOC103403638 [Malus domestica]	NA	NA	NA	-	0.901357	1.58645	1.32894	2.59383	7.28136	3.37696
MD16G1159200	PREDICTED: GATA transcription factor 15 [Malus domestica]	NA	NA	NA	-	8.14526	8.62485	5.83941	22.1213	26.7333	23.2673
MD16G1159600	PREDICTED: uncharacterized protein LOC103431955 isoform X2 [Malus domestica]	NA	NA	NA	-	11.0287	4.92478	5.04335	32.8524	17.0335	11.886
MD16G1160100	major allergen Mal d 1.03G [Malus domestica]	04075(Plant hormone signal transduction)	K14517	NA	-	27.8849	4.86859	6.89011	341.67	1672	1354.82
MD16G1162800	ethylene-responsive transcription factor RAP2-3 [Malus domestica]	04626(Plant-pathogen interaction)	K13434	NA	-	28.0268	36.954	32.4211	87.0132	139.187	140.258
MD16G1162900	ethylene-responsive transcription factor RAP2-3 [Malus domestica]	NA	NA	NA	-	13.3179	1.99105	1.42671	40.3956	7.12828	7.52952
MD16G1169200	PREDICTED: protein RALF-like 33 [Malus domestica]	NA	NA	NA	-	4.86745	1.61773	4.6978	29.0582	11.8691	16.7193
MD16G1169800	PREDICTED: KH domain-containing protein HEN4-like isoform X1 [Pyrus x bretschneideri]	NA	NA	NA	-	0.56481	0.182601	0.0964115	1.93396	1.2036	1.35105
MD16G1171500	PREDICTED: uncharacterized protein LOC103932018 [Pyrus x bretschneideri]	NA	NA	NA	-	1.38374	0.773873	1.15174	3.91994	3.05391	2.16071
MD16G1173400	PREDICTED: acyl-CoA-binding domain-containing protein 4 [Malus domestica]	00860(Porphyrin and chlorophyll metabolism)	K19073	EC:1.3.1.75	-	1.24398	0.90375	1.23221	4.10761	6.33461	6.01994
MD16G1174700	PREDICTED: divinyl chlorophyllide a 8-vinyl-reductase, chloroplastic-like [Malus domestica]	01200(Carbon metabolism);00620(Pyruvate metabolism);00710(Carbon fixation in photosynthetic organisms)	K01006	EC:2.7.9.1	-	9.68506	3.4709	2.39042	375.121	64.6019	55.275
MD16G1179500	PREDICTED: pyruvate, phosphate dikinase, chloroplastic-like [Malus domestica]	01230(Biosynthesis of amino acids);00630(Glyoxylate and dicarboxylate metabolism);00910(Nitrogen metabolism);00250(Alanine, aspartate and glutamate metabolism);00220(Arginine biosynthesis)	K01915	EC:6.3.1.2	-	10.5602	15.1514	9.22847	62.8126	53.5959	34.546
MD16G1181300	PREDICTED: glutamine synthetase leaf isozyme, chloroplastic [Malus domestica]	03008(Ribosome biogenesis in eukaryotes);03018(RNA degradation)	K12619	EC:3.1.13.-	-	1.3167	1.45965	0.383293	10.0847	7.70528	3.65103
MD16G1194000	PREDICTED: FRIGIDA-like protein 4a [Malus domestica]	NA	NA	NA	-	90.4146	202.985	192.224	235.983	639.204	413.77
MD16G1196500	PREDICTED: uncharacterized protein LOC103959237 [Pyrus x bretschneideri]	NA	NA	NA	-	13.7906	4.21836	3.36873	52.5755	24.0543	19.026
MD16G1196600	PREDICTED: protein CDC73 homolog isoform X2 [Malus domestica]	00270(Cysteine and methionine metabolism)	K08967	EC:1.13.11.53;EC:1.13.11.54	-	11.5596	27.5729	29.1391	32.9725	108.758	81.6605
MD16G1199500	PREDICTED: 1,2-dihydroxy-3-keto-5-methylthiopentene dioxygenase 1-like [Pyrus x bretschneideri]	00402(Benzoxazinoid biosynthesis)	K13229	EC:1.14.20.2	K08967,ko00270,Cysteine and methionine metabolism	28.5653	34.2808	29.7539	78.4145	87.4687	82.0645
MD16G1214100	PREDICTED: 1-aminocyclopropane-1-carboxylate oxidase homolog 1-like [Malus domestica]	04712(Circadian rhythm - plant)	K12115	NA	-	1.31927	1.0532	0.964078	3.9185	6.08693	3.18857
MD16G1255700	PREDICTED: adagio protein 1 [Malus domestica]	03040(Spliceosome)	K12846	NA	-	13.7772	4.85886	4.69848	52.4392	24.0639	16.3692
MD16G1256400	PREDICTED: U4/U6.U5 small nuclear ribonucleoprotein 27 kDa protein-like [Malus domestica]	NA	NA	NA	-	13.7744	10.0013	8.6414	44.3699	25.7463	24.9674
MD17G1000700	PREDICTED: protein NUCLEAR FUSION DEFECTIVE 4-like [Malus domestica]	04626(Plant-pathogen interaction)	K13459	NA	-	2.84896	0.722754	0.824546	10.8427	2.72936	4.22505
MD17G1006100	PREDICTED: proline-rich receptor-like protein kinase PERK10 [Malus domestica]	04626(Plant-pathogen interaction)	K13430	EC:2.7.11.1	-	5.10227	2.79852	2.2063	20.0872	7.43075	6.26757
MD17G1006200	PREDICTED: proline-rich receptor-like protein kinase PERK10 [Malus domestica]	NA	NA	NA	-	3.52243	7.19483	7.65206	26.4548	22.4629	18.1723
MD17G1006900	PREDICTED: clumping factor B-like [Malus domestica]	00230(Purine metabolism)	K00939	EC:2.7.4.3	-	17.4862	23.4753	22.8098	49.1248	58.414	55.8247
MD17G1014400	PREDICTED: probable adenylate kinase 7, mitochondrial [Malus domestica]	NA	NA	NA	-	11.4019	10.3047	14.893	42.549	40.8371	42.5043
MD17G1015100	PREDICTED: transcription termination factor MTERF5, chloroplastic-like [Pyrus x bretschneideri]	NA	NA	NA	-	0.80595	0.265039	0.192415	2.46555	1.08984	1.01198
MD17G1015900	PREDICTED: kelch repeat-containing protein At3g27220-like [Malus domestica]	00511(Other glycan degradation)	K01206	EC:3.2.1.51	-	2.95432	1.08459	1.3462	17.9569	52.307	58.3266
MD17G1021700	PREDICTED: GDSL esterase/lipase At5g14450 [Malus domestica]	NA	NA	NA	-	0.622186	0.476843	0.0865456	3.08996	1.23478	1.01644
MD17G1039200	PREDICTED: gibberellin-regulated protein 14-like [Malus domestica]	NA	NA	NA	-	1.09441	0.102891	0	25.2937	4.93462	3.25662
MD17G1051200	PREDICTED: mini zinc finger protein 2-like [Malus domestica]	NA	NA	NA	-	4.17318	5.41782	5.82124	31.145	20.705	20.1856
MD17G1055800	PREDICTED: tRNA (guanosine(18)-2'-O)-methyltransferase-like isoform X1 [Malus domestica]	04626(Plant-pathogen interaction)	K16224	NA	-	17.8541	44.2941	34.0785	75.8563	197.225	138.013
MD17G1062200	PREDICTED: LOW QUALITY PROTEIN: receptor-like protein kinase FERONIA [Malus domestica]	00905(Brassinosteroid biosynthesis)	K12640	EC:1.14.-.-	-	1.0488	0.181969	0.107337	4.0918	0.747303	1.18276
MD17G1064800	PREDICTED: cytochrome P450 85A [Pyrus x bretschneideri]	03060(Protein export)	K03217	NA	-	6.56794	2.3317	3.24662	19.8853	16.7432	10.5744
MD17G1065400	developmental protein SEPALLATA 1 [Malus domestica]	04120(Ubiquitin mediated proteolysis)	K10615	EC:2.3.2.26	-	10.7938	9.55298	16.1028	33.6669	26.1732	26.7508
MD17G1074800	PREDICTED: ultraviolet-B receptor UVR8-like [Malus domestica]	NA	NA	NA	-	22.0886	21.2447	18.7124	61.6898	66.0255	61.396
MD17G1085300	PREDICTED: uncharacterized protein LOC103404753 [Malus domestica]	00260(Glycine, serine and threonine metabolism);00350(Tyrosine metabolism);00360(Phenylalanine metabolism);00410(beta-Alanine metabolism);00950(Isoquinoline alkaloid biosynthesis);00960(Tropane, piperidine and pyridine alkaloid biosynthesis)	K00276	EC:1.4.3.21	-	40.0924	11.0165	12.1449	209.533	461.474	450.152
MD17G1087200	PREDICTED: G-type lectin S-receptor-like serine/threonine-protein kinase At2g19130 [Malus domestica]	NA	NA	NA	-	5.56244	6.5618	6.30022	19.7644	16.7251	19.4804
MD17G1094200	PREDICTED: transcription factor TRY-like [Nelumbo nucifera]	NA	NA	NA	-	0.948541	0.81867	0.198115	22.6538	11.9747	8.83469
MD17G1103400	PREDICTED: uncharacterized protein LOC103404950 isoform X1 [Malus domestica]	NA	NA	NA	-	4.85755	1.85557	2.03635	14.6296	6.94209	3.74629
MD17G1114500	PREDICTED: transmembrane protein 256 homolog [Malus domestica]	04626(Plant-pathogen interaction)	K13456	NA	-	1.9021	0.358127	0.363994	8.89602	2.46138	2.00793
MD17G1117900	PREDICTED: RPM1-interacting protein 4-like [Malus domestica]	04075(Plant hormone signal transduction)	K14484	NA	-	33.7372	38.354	45.2589	194.952	138.884	123.023
MD17G1118300	PREDICTED: ribulose-1,5 bisphosphate carboxylase/oxygenase large subunit N-methyltransferase, chloroplastic [Malus domestica]	00196(Photosynthesis - antenna proteins)	K08909	NA	-	3.00038	1.33358	1.10019	8.98001	8.91612	3.85091
MD17G1123800	PREDICTED: photosystem I chlorophyll a/b-binding protein 3-1, chloroplastic [Malus domestica]	00480(Glutathione metabolism)	K00799	EC:2.5.1.18	-	13.0227	22.9547	9.89854	97.2027	51.7588	38.5635
MD17G1134300	PREDICTED: glutathione S-transferase F9-like [Pyrus x bretschneideri]	NA	NA	NA	-	2.45356	1.48039	0.978784	11.5622	9.54368	14.2002
MD17G1137000	PREDICTED: conserved oligomeric Golgi complex subunit 5-like [Malus domestica]	04626(Plant-pathogen interaction)	K13412	EC:2.7.11.1	-	11.0615	5.83293	6.40008	31.3207	17.8434	16.5437
MD17G1150400	PREDICTED: calcium-dependent protein kinase SK5-like [Prunus mume]	NA	NA	NA	-	1.08331	1.2813	1.49642	4.69791	6.18502	4.55923
MD17G1153400	PREDICTED: uncharacterized protein LOC103454047 [Malus domestica]	NA	NA	NA	-	1.17411	0.434107	0.270134	4.4228	2.48242	1.79461
MD17G1164200	PREDICTED: uncharacterized membrane protein At1g16860-like [Malus domestica]	04144(Endocytosis)	K05747	NA	-	2.41934	0.707749	1.0086	14.5658	3.84077	4.50391
MD17G1172100	PREDICTED: ras-associated and pleckstrin homology domains-containing protein 1-like isoform X2 [Pyrus x bretschneideri]	01200(Carbon metabolism);01230(Biosynthesis of amino acids);00010(Glycolysis / Gluconeogenesis);00030(Pentose phosphate pathway);00051(Fructose and mannose metabolism);00052(Galactose metabolism);03018(RNA degradation)	K00850	EC:2.7.1.11	-	8.01716	3.15262	5.18103	31.0055	7.00106	11.6592
MD17G1180600	PREDICTED: ATP-dependent 6-phosphofructokinase 6-like [Malus domestica]	04075(Plant hormone signal transduction)	K14484	NA	K00850,ko04152,AMPK signaling pathway;K00850,ko01230,Biosynthesis of amino acids;K00850,ko00010,Glycolysis / Gluconeogenesis;K00850,ko03018,RNA degradation;K00850,ko00052,Galactose metabolism;K00850,ko00680,Methane metabolism;K00850,ko01200,Carbon metabolism;K00850,ko00051,Fructose and mannose metabolism;K00850,ko00030,Pentose phosphate pathway;K00850,ko05230,Central carbon metabolism in cancer	5.79456	4.9482	4.95765	127.284	187.012	112.161
MD17G1189100	PREDICTED: LOW QUALITY PROTEIN: auxin-responsive protein IAA21-like [Malus domestica]	NA	NA	NA	-	0.679658	0.138786	0.417423	5.56352	1.72206	1.25507
MD17G1201300	PREDICTED: U3 small nucleolar RNA-associated protein 20 isoform X2 [Malus domestica]	NA	NA	NA	-	4.88377	3.10909	3.02962	15.2181	7.54032	7.49136
MD17G1207500	hypothetical protein PRUPE_ppa026148mg [Prunus persica]	NA	NA	NA	-	8.95217	17.5639	14.69	54.2516	460.412	380.549
MD17G1210200	PREDICTED: uncharacterized protein LOC103437265 [Malus domestica]	NA	NA	NA	-	33.7128	94.1553	102.981	240.347	264.06	158.095
MD17G1231000	PREDICTED: 14-3-3-like protein D isoform X2 [Pyrus x bretschneideri]	04075(Plant hormone signal transduction)	K14491	NA	-	49.4892	41.213	36.4661	146.089	155.381	162.737
MD17G1234400	PREDICTED: probable transcription factor GLK1 isoform X1 [Malus domestica]	NA	NA	NA	-	1.2779	0.791472	0.395037	12.7466	4.80087	2.89652
MD17G1243500	PREDICTED: protein YIF1B-like [Malus domestica]	00520(Amino sugar and nucleotide sugar metabolism)	K01183	EC:3.2.1.14	-	24.3893	5.16816	5.84569	72.862	25.2531	14.4599
MD17G1248100	PREDICTED: putative receptor-like protein kinase At4g00960 [Pyrus x bretschneideri]	00500(Starch and sucrose metabolism)	K01177	EC:3.2.1.2	-	5.85993	3.08567	3.6888	35.5379	33.6681	21.8955
MD17G1259300	PREDICTED: uncharacterized protein slr0889-like [Malus domestica]	04145(Phagosome)	K07374	NA	-	7.45456	7.40346	10.4307	26.5787	39.2395	48.3958
MD17G1266700	PREDICTED: F-box/LRR-repeat MAX2 homolog A-like [Malus domestica]	04075(Plant hormone signal transduction)	K13415	EC:2.7.10.1;EC:2.7.11.1	-	10.6629	16.8786	12.3722	56.0325	192.742	128.628
MD17G1269300	PREDICTED: probable inactive receptor kinase At1g48480 [Malus domestica]	04626(Plant-pathogen interaction)	K13424	NA	-	5.55574	8.20793	7.58864	19.5315	25.8653	31.2446
MD17G1278100	PREDICTED: probable WRKY transcription factor 23 [Malus domestica]	01230(Biosynthesis of amino acids);00270(Cysteine and methionine metabolism)	K00789	EC:2.5.1.6	-	2.25204	0.321536	0.259368	6.0029	1.13328	1.00154
MD17G1283400	PREDICTED: S-adenosylmethionine synthase 1 [Malus domestica]				-	8.20436	4.58278	3.01476	26.3158	8.04704	8.03423

## Sheet: Co-down DEGs in 2020-21
Gene id	Description	KEGG(2020)	KO_ENTRY(2020)	EC(2020)	KEGG(KO,pathway,description)(2021)	FPKM.Control-1	RPKM.Control-2	RPKM.Control-3	FPKM.Waxed-1	RPKM.Waxed-2	RPKM.Waxed-3
MD00G1003800	PREDICTED: phosphoglucomutase, chloroplastic-like [Malus domestica]	00010(Glycolysis / Gluconeogenesis);00030(Pentose phosphate pathway);00052(Galactose metabolism);00500(Starch and sucrose metabolism);00520(Amino sugar and nucleotide sugar metabolism);00230(Purine metabolism)	K01835	EC:5.4.2.2	K01835,ko00500,Starch and sucrose metabolism;K01835,ko00230,Purine metabolism;K01835,ko00010,Glycolysis / Gluconeogenesis;K01835,ko00052,Galactose metabolism;K01835,ko00520,Amino sugar and nucleotide sugar metabolism;K01835,ko00030,Pentose phosphate pathway;K01835,ko00521,Streptomycin biosynthesis	9.5324	6.61634	7.43129	1.36952	1.24177	3.40531
MD00G1004900	PREDICTED: transcription factor TCP19-like [Malus domestica]	04712(Circadian rhythm - plant)	K16221	NA	-	27.5422	15.6262	19.9788	5.10481	5.73707	5.86831
MD00G1005300	PREDICTED: uncharacterized protein LOC103439700 [Malus domestica]	04120(Ubiquitin mediated proteolysis)	K03363	NA	-	56.3361	11.6619	11.8392	13.1112	2.93594	2.31498
MD00G1009300	PREDICTED: uncharacterized protein LOC103434908 [Malus domestica]	NA	NA	NA	-	31.9977	28.1481	23.4369	7.02719	8.76072	9.8649
MD00G1019200	PREDICTED: membrane-associated 30 kDa protein, chloroplastic [Pyrus x bretschneideri]	NA	NA	NA	-	15.0203	15.1241	13.229	5.06688	6.09322	7.74315
MD00G1027700	PREDICTED: TMV resistance protein N-like [Malus domestica]	03040(Spliceosome);04141(Protein processing in endoplasmic reticulum);04144(Endocytosis)	K03283	NA	-	4.36226	1.91285	1.37079	1.18621	0.344867	0.491046
MD00G1029300	PREDICTED: probable L-ascorbate peroxidase 6, chloroplastic isoform X1 [Malus domestica]	00053(Ascorbate and aldarate metabolism);00480(Glutathione metabolism)	K00434	EC:1.11.1.11	-	80.0201	59.2073	70.4818	33.4885	24.2163	25.9623
MD00G1031300	PREDICTED: pyruvate kinase isozyme A, chloroplastic-like isoform X2 [Malus domestica]	01200(Carbon metabolism);01230(Biosynthesis of amino acids);00010(Glycolysis / Gluconeogenesis);00620(Pyruvate metabolism);00230(Purine metabolism)	K00873	EC:2.7.1.40	K00873,ko04922,Glucagon signaling pathway;K00873,ko01200,Carbon metabolism;K00873,ko04930,Type II diabetes mellitus;K00873,ko01230,Biosynthesis of amino acids;K00873,ko05230,Central carbon metabolism in cancer;K00873,ko00620,Pyruvate metabolism;K00873,ko05203,Viral carcinogenesis;K00873,ko00230,Purine metabolism;K00873,ko00010,Glycolysis / Gluconeogenesis	13.3911	5.09186	6.79476	2.76923	1.41925	3.33289
MD00G1036100	PREDICTED: cytochrome P450 78A9-like [Malus domestica]	00903(Limonene and pinene degradation);00945(Stilbenoid, diarylheptanoid and gingerol biosynthesis)	K00517	NA	-	11.1252	5.87805	8.70549	1.1985	0.244173	0.478405
MD00G1036300	PREDICTED: homeobox-leucine zipper protein ATHB-12-like [Malus domestica]	00750(Vitamin B6 metabolism)	K05275	EC:1.1.1.65	-	60.6414	124.467	118.03	3.76126	6.11199	14.2572
MD00G1038200	PREDICTED: uncharacterized protein LOC103954112 [Pyrus x bretschneideri]	00565(Ether lipid metabolism)	K16794	NA	-	5.24673	5.80025	5.46061	1.08268	2.27516	2.14887
MD00G1049000	PREDICTED: lycopene beta cyclase, chloroplastic/chromoplastic [Malus domestica]	04146(Peroxisome)	K04565	EC:1.15.1.1	K06443,ko00906,Carotenoid biosynthesis	11.819	9.00374	9.02028	4.94946	3.09803	3.30922
MD00G1051500	PREDICTED: superoxide dismutase [Cu-Zn] [Malus domestica]	00190(Oxidative phosphorylation)	K03955	NA	-	130.565	50.3518	27.6945	52.0838	13.198	9.97439
MD00G1052000	PREDICTED: acyl carrier protein 1, chloroplastic-like [Malus domestica]	04075(Plant hormone signal transduction)	K14488	NA	-	71.819	98.458	111.906	10.562	24.3062	40.6363
MD00G1067200	PREDICTED: indole-3-acetic acid-induced protein ARG7-like [Pyrus x bretschneideri]	00563(Glycosylphosphatidylinositol(GPI)-anchor biosynthesis)	K05283	EC:2.3.-.-	K14488,ko04075,Plant hormone signal transduction	195.163	49.0121	45.8569	16.7162	1.13899	4.35357
MD00G1071800	PREDICTED: RING-H2 finger protein ATL52-like [Malus domestica]	NA	NA	NA	-	5.66627	4.91754	6.03601	2.29622	1.60815	1.39829
MD00G1072600	-	00240(Pyrimidine metabolism)	K01937	EC:6.3.4.2	-	14.7573	12.8033	14.7087	2.44744	0.292223	1.5268
MD00G1085100	PREDICTED: CTP synthase-like [Pyrus x bretschneideri]	NA	NA	NA	K01937,ko00240,Pyrimidine metabolism	20.1414	22.2454	38.3001	2.95657	3.10892	2.79428
MD00G1085200	PREDICTED: probable polyamine aminopropyl transferase [Malus domestica]	NA	NA	NA	-	4.28768	3.40259	3.81344	0.714043	1.12432	1.61544
MD00G1085900	PREDICTED: probable E3 ubiquitin-protein ligase XBOS32 [Pyrus x bretschneideri]	NA	NA	NA	-	10.9325	2.85651	3.06561	2.44716	0.767466	1.12313
MD00G1103800	PREDICTED: protein GrpE-like [Malus domestica]	00190(Oxidative phosphorylation);00860(Porphyrin and chlorophyll metabolism)	K02259	NA	-	20.0277	15.3181	14.7205	5.13061	4.65321	3.47265
MD00G1104700	protein ODORANT1-like [Malus domestica]	NA	NA	NA	-	58.6314	62.2179	34.3207	11.6292	1.55239	3.74261
MD00G1107600	PREDICTED: probable protein S-acyltransferase 4 [Pyrus x bretschneideri]	01230(Biosynthesis of amino acids);00400(Phenylalanine, tyrosine and tryptophan biosynthesis)	K01657	EC:4.1.3.27	-	11.8817	12.1727	12.376	0.894519	0.819233	1.30787
MD00G1120600	PREDICTED: putative disease resistance RPP13-like protein 1 [Malus domestica]	00100(Steroid biosynthesis)	K01853	EC:5.4.99.8	-	5.53386	4.44239	4.39545	1.88747	1.85153	2.04225
MD00G1130000	PREDICTED: LOW QUALITY PROTEIN: cycloartenol synthase-like [Malus domestica]	NA	NA	NA	-	5.57138	2.40797	2.57368	1.80871	0.909332	1.54245
MD00G1132400	PREDICTED: protein ABA DEFICIENT 4, chloroplastic-like isoform X2 [Malus domestica]	NA	NA	NA	-	13.8909	1.56344	2.16198	4.73901	0.431092	0.852795
MD00G1135400	PREDICTED: uncharacterized protein LOC103952911 [Pyrus x bretschneideri]	00480(Glutathione metabolism)	K00799	EC:2.5.1.18	-	179.861	65.6827	76.9953	66.7223	15.8163	17.3692
MD00G1136300	hypothetical protein PRUPE_ppa011108mg [Prunus persica]	03060(Protein export)	K03217	NA	K00799,ko00982,Drug metabolism - cytochrome P450;K00799,ko01524,Platinum drug resistance;K00799,ko05204,Chemical carcinogenesis;K00799,ko00980,Metabolism of xenobiotics by cytochrome P450;K00799,ko00480,Glutathione metabolism	20.6984	19.4656	37.4376	8.24465	4.45872	4.18433
MD00G1137500	PREDICTED: LOW QUALITY PROTEIN: inner membrane protein PPF-1, chloroplastic-like [Malus domestica]	01200(Carbon metabolism);00020(Citrate cycle (TCA cycle));00620(Pyruvate metabolism)	K01679	EC:4.2.1.2	-	65.033	30.0913	30.2762	17.5317	9.50627	6.97597
MD00G1140200	PREDICTED: fumarate hydratase 1, mitochondrial [Malus domestica]	00052(Galactose metabolism);00500(Starch and sucrose metabolism)	K01187	EC:3.2.1.20	K01679,ko00720,Carbon fixation pathways in prokaryotes;K01679,ko05211,Renal cell carcinoma;K01679,ko05200,Pathways in cancer;K01679,ko00620,Pyruvate metabolism;K01679,ko00020,Citrate cycle (TCA cycle);K01679,ko01200,Carbon metabolism	24.0894	6.6486	8.60116	2.47486	0.58521	1.10755
MD00G1148100	PREDICTED: uncharacterized protein LOC103935166 [Pyrus x bretschneideri]	NA	NA	NA	-	58.1964	33.7529	32.2543	12.1467	10.3001	18.9326
MD00G1156200	PREDICTED: alpha-1,4 glucan phosphorylase L isozyme, chloroplastic/amyloplastic-like [Pyrus x bretschneideri]	NA	NA	NA	K00688,ko04922,Glucagon signaling pathway;K00688,ko04910,Insulin signaling pathway;K00688,ko04931,Insulin resistance;K00688,ko00500,Starch and sucrose metabolism	28.5743	14.5822	11.0312	4.5807	2.04976	3.34674
MD00G1172000	PREDICTED: membrane-anchored ubiquitin-fold protein 1 [Malus domestica]	00510(N-Glycan biosynthesis);04141(Protein processing in endoplasmic reticulum)	K12669	NA	-	32.1611	25.2019	23.9919	11.4054	5.43833	8.26093
MD00G1180300	PREDICTED: probable dolichyl-diphosphooligosaccharide--protein glycosyltransferase subunit 3B [Malus domestica]	00270(Cysteine and methionine metabolism)	K00547	EC:2.1.1.10	K12669,ko00513,Various types of N-glycan biosynthesis;K12669,ko04141,Protein processing in endoplasmic reticulum;K12669,ko00510,N-Glycan biosynthesis	8.68984	2.73584	2.27584	2.20082	0.645717	0.953546
MD00G1181400	PREDICTED: homocysteine S-methyltransferase 3 [Pyrus x bretschneideri]	NA	NA	NA	-	64.6328	14.1062	10.1257	27.3351	4.1357	5.95659
MD00G1190500	PREDICTED: haloacid dehalogenase-like hydrolase domain-containing protein Sgpp [Pyrus x bretschneideri]	03010(Ribosome)	K02904	NA	-	7.89643	5.80475	6.71412	1.33995	1.08984	1.89806
MD00G1199600	PREDICTED: 50S ribosomal protein L29, chloroplastic-like [Pyrus x bretschneideri]	NA	NA	NA	-	19.1617	14.374	14.3675	3.2403	1.83559	4.36428
MD00G1200100	PREDICTED: glycolipid transfer protein 1-like [Malus domestica]	04712(Circadian rhythm - plant)	K12118	NA	-	22.468	9.6501	9.8621	8.20603	2.13046	3.22218
MD00G1201600	PREDICTED: cryptochrome-1 isoform X1 [Malus domestica]	NA	NA	NA	K12118,ko04712,Circadian rhythm - plant	34.7814	17.1481	10.7691	13.236	3.46347	2.9496
MD00G1208600	PREDICTED: sodium/hydrogen exchanger 6 [Malus domestica]	02010(ABC transporters)	K05681	NA	-	2.67364	0.897309	0.749151	1.00033	0.384035	0.405726
MD00G1214200	PREDICTED: ABC transporter G family member 24-like [Malus domestica]	NA	NA	NA	-	17.1741	6.66422	6.19283	7.24265	2.01923	3.34651
MD00G1214800	PREDICTED: protein fluG [Malus domestica]	00100(Steroid biosynthesis)	K01853	EC:5.4.99.8	-	23.1092	4.01638	4.48843	5.15001	2.24952	1.50996
MD00G1220900	PREDICTED: LOW QUALITY PROTEIN: cycloartenol synthase-like [Malus domestica]	NA	NA	NA	K01853,ko00100,Steroid biosynthesis	9.5863	4.72042	5.04526	3.64032	1.84201	2.72726
MD01G1016700	PREDICTED: uncharacterized protein LOC103934109 [Pyrus x bretschneideri]	01200(Carbon metabolism);01212(Fatty acid metabolism);00620(Pyruvate metabolism);00640(Propanoate metabolism);00061(Fatty acid biosynthesis);00253(Tetracycline biosynthesis)	K01961	EC:6.4.1.2;EC:6.3.4.14	-	10.354	3.27382	3.05583	2.83448	0.847752	1.14193
MD01G1022300	PREDICTED: biotin carboxylase 1, chloroplastic-like [Pyrus x bretschneideri]	NA	NA	NA	K01961,ko00720,Carbon fixation pathways in prokaryotes;K01961,ko00061,Fatty acid biosynthesis;K01961,ko00253,Tetracycline biosynthesis;K01961,ko00640,Propanoate metabolism;K01961,ko01200,Carbon metabolism;K01961,ko00620,Pyruvate metabolism;K01961,ko01212,Fatty acid metabolism	62.3131	50.5824	58.0405	6.46747	3.74313	6.02244
MD01G1025400	PREDICTED: probable glucan 1,3-beta-glucosidase A [Pyrus x bretschneideri]	NA	NA	NA	-	33.3878	10.9064	15.0847	8.63635	0.486805	0.705584
MD01G1032400	PREDICTED: lipase 3-like [Malus domestica]	NA	NA	NA	-	9.8913	5.07108	4.15708	1.50591	0.0638337	0.17197
MD01G1038000	PREDICTED: mitochondrial uncoupling protein 5-like [Malus domestica]	01212(Fatty acid metabolism);00062(Fatty acid elongation);01040(Biosynthesis of unsaturated fatty acids)	K10703	EC:4.2.1.134	-	22.1613	4.50415	5.25845	5.63191	0.643591	1.07334
MD01G1038800	PREDICTED: very-long-chain (3R)-3-hydroxyacyl-CoA dehydratase PASTICCINO 2A [Malus domestica]	00730(Thiamine metabolism);00900(Terpenoid backbone biosynthesis)	K01662	EC:2.2.1.7	K10703,ko01212,Fatty acid metabolism;K10703,ko00062,Fatty acid elongation;K10703,ko01040,Biosynthesis of unsaturated fatty acids	45.3526	5.9561	8.64812	9.88483	1.59477	2.46792
MD01G1041300	PREDICTED: probable 1-deoxy-D-xylulose-5-phosphate synthase 2, chloroplastic [Malus domestica]	00500(Starch and sucrose metabolism);00520(Amino sugar and nucleotide sugar metabolism)	K15920	EC:3.2.1.37	-	30.9599	22.5806	19.2862	2.63482	1.23344	3.15063
MD01G1045300	PREDICTED: probable beta-D-xylosidase 6 [Malus domestica]	NA	NA	NA	-	5.65164	7.04054	6.6208	1.87557	1.61187	2.47711
MD01G1045900	PREDICTED: uncharacterized protein LOC103417568 [Malus domestica]	00945(Stilbenoid, diarylheptanoid and gingerol biosynthesis)	K16040	EC:2.1.1.240	-	89.8264	84.5117	71.7249	37.2134	18.46	29.2918
MD01G1051900	O-methyltransferase 1 [Malus domestica]	NA	NA	NA	-	1040.63	1215.06	1185.68	31.0184	30.7503	47.2501
MD01G1053700	PREDICTED: K(+) efflux antiporter 2, chloroplastic-like [Malus domestica]	00062(Fatty acid elongation);01040(Biosynthesis of unsaturated fatty acids)	K01068	EC:3.1.2.2	-	76.8408	62.9031	56.9591	21.2831	24.1151	32.9442
MD01G1058300	PREDICTED: uncharacterized protein LOC103932519 [Pyrus x bretschneideri]	NA	NA	NA	K01068,ko00062,Fatty acid elongation;K01068,ko01040,Biosynthesis of unsaturated fatty acids	2.58745	2.2679	2.23705	0.900437	0.688872	0.601894
MD01G1065200	PREDICTED: uncharacterized protein LOC103957377 [Pyrus x bretschneideri]	01200(Carbon metabolism);01230(Biosynthesis of amino acids);00920(Sulfur metabolism);00270(Cysteine and methionine metabolism);00460(Cyanoamino acid metabolism)	K13034	EC:2.5.1.47;EC:4.4.1.9	-	23.7908	77.7362	75.6309	1.98056	1.98044	3.4828
MD01G1065600	L-3-cyanoalanine synthase 2, mitochondrial [Malus domestica]	04120(Ubiquitin mediated proteolysis)	K10576	EC:2.3.2.23	K13034,ko00460,Cyanoamino acid metabolism;K13034,ko01230,Biosynthesis of amino acids;K13034,ko00270,Cysteine and methionine metabolism;K13034,ko01200,Carbon metabolism;K13034,ko00920,Sulfur metabolism	1047.55	760.869	858.098	6.61322	1.40754	1.28541
MD01G1065900	PREDICTED: ubiquitin-conjugating enzyme E2-23 kDa-like isoform X1 [Malus domestica]	00942(Anthocyanin biosynthesis)	K12937	EC:2.4.1.254	K10576,ko04120,Ubiquitin mediated proteolysis	73.4745	13.89	10.6624	17.435	5.65085	5.98292
MD01G1068500	PREDICTED: soyasaponin III rhamnosyltransferase-like [Malus domestica]	00942(Anthocyanin biosynthesis)	K17193	EC:2.4.2.51	-	10.4447	2.05345	1.88457	2.65753	0.336517	0.385408
MD01G1068700	PREDICTED: putative UDP-rhamnose:rhamnosyltransferase 1 [Malus domestica]	04075(Plant hormone signal transduction)	K14512	EC:2.7.11.24	-	6.94077	3.53471	4.67733	1.84852	1.04135	0.997489
MD01G1069100	MAPK [Malus hupehensis]	03010(Ribosome)	K02931	NA	-	25.9234	4.51634	4.99146	8.32066	0.597813	0.519297
MD01G1069800	PREDICTED: 50S ribosomal protein L5, chloroplastic [Malus domestica]	00941(Flavonoid biosynthesis)	K08695	EC:1.3.1.77	K02931,ko03010,Ribosome	58.2139	66.7869	68.5931	18.669	25.1905	37.3245
MD01G1077700	PREDICTED: anthocyanidin reductase-like [Malus domestica]	00941(Flavonoid biosynthesis)	K08695	EC:1.3.1.77	-	15.0136	23.2639	20.0197	5.51965	5.60438	9.61217
MD01G1077800	PREDICTED: anthocyanidin reductase-like [Malus domestica]	04120(Ubiquitin mediated proteolysis)	K04506	EC:2.3.2.27	-	42.2573	55.4274	44.4767	11.8186	14.0801	17.673
MD01G1082000	PREDICTED: E3 ubiquitin-protein ligase SINAT3-like isoform X1 [Malus domestica]	04075(Plant hormone signal transduction)	K14486	NA	-	12.9462	6.73676	7.41982	5.16995	2.81583	3.78807
MD01G1083400	PREDICTED: auxin response factor 18-like isoform X1 [Malus domestica]	00062(Fatty acid elongation)	K15397	EC:2.3.1.199	K14486,ko04075,Plant hormone signal transduction	2.47965	2.63494	2.6527	0.813688	0.450878	0.595704
MD01G1087400	PREDICTED: 3-ketoacyl-CoA synthase 1-like [Malus domestica]	NA	NA	NA	K15397,ko00062,Fatty acid elongation	46.5732	9.66104	11.33	13.0767	1.25946	0.917921
MD01G1089100	PREDICTED: metal tolerance protein 1-like [Malus domestica]	00940(Phenylpropanoid biosynthesis)	K13066	EC:2.1.1.68	-	29.7833	33.8001	31.8366	8.04376	8.27704	12.7718
MD01G1089800	PREDICTED: caffeic acid 3-O-methyltransferase-like [Malus domestica]	NA	NA	NA	-	13.832	3.61298	1.42078	5.1029	0.483219	0.612615
MD01G1100100	PREDICTED: pullulanase 1, chloroplastic-like isoform X2 [Pyrus x bretschneideri]	NA	NA	NA	-	28.1739	11.5234	11.1624	2.75416	1.23538	1.61969
MD01G1101700	PREDICTED: uncharacterized protein ycf45-like [Malus domestica]	00564(Glycerophospholipid metabolism)	K00111	EC:1.1.5.3	-	12.3501	16.5096	13.934	5.21865	5.54809	7.28043
MD01G1103300	PREDICTED: glycerol-3-phosphate dehydrogenase SDP6, mitochondrial isoform X1 [Malus domestica]	NA	NA	NA	K00111,ko00564,Glycerophospholipid metabolism	17.469	5.85972	6.40912	4.13022	1.55286	1.95228
MD01G1120400	PREDICTED: uncharacterized protein LOC103426379 [Malus domestica]	01200(Carbon metabolism);00020(Citrate cycle (TCA cycle));00310(Lysine degradation);00380(Tryptophan metabolism)	K00164	EC:1.2.4.2	-	38.6191	50.0633	48.6666	5.6386	0.386091	0.400646
MD01G1122800	PREDICTED: 2-oxoglutarate dehydrogenase, mitochondrial [Malus domestica]	NA	NA	NA	K00164,ko00310,Lysine degradation;K00164,ko00380,Tryptophan metabolism;K00164,ko01200,Carbon metabolism;K00164,ko00020,Citrate cycle (TCA cycle)	50.7227	30.1226	31.0406	4.40814	4.35891	7.62911
MD01G1136300	PREDICTED: uncharacterized protein LOC105435519 [Cucumis sativus]	NA	NA	NA	-	31.6512	45.0622	33.2873	7.99818	18.0224	19.7956
MD01G1138900	PREDICTED: uncharacterized protein LOC103406357 [Malus domestica]	00905(Brassinosteroid biosynthesis)	K09588	EC:1.14.-.-	-	1.88189	0.728475	0.462756	0.428672	0.127724	0.0941102
MD01G1152100	PREDICTED: cytochrome P450 90A1-like isoform X2 [Malus domestica]	NA	NA	NA	K09588,ko00905,Brassinosteroid biosynthesis	192.089	175.199	143.551	21.7066	55.3458	72.1588
MD01G1159900	PREDICTED: biotin carboxyl carrier protein of acetyl-CoA carboxylase-like [Malus domestica]	NA	NA	NA	-	70.2675	32.2197	33.2761	12.3752	4.34909	5.24219
MD01G1160800	PREDICTED: staphylococcal-like nuclease CAN2 [Malus domestica]	NA	NA	NA	-	42.5903	46.1197	32.388	11.7177	16.7646	15.4894
MD01G1163400	PREDICTED: pseudouridine-5'-phosphatase-like [Malus domestica]	NA	NA	NA	-	77.6203	72.8314	68.4989	31.1709	31.3162	34.622
MD01G1166700	PREDICTED: expansin-A8 [Malus domestica]	01200(Carbon metabolism);00910(Nitrogen metabolism);00250(Alanine, aspartate and glutamate metabolism);00220(Arginine biosynthesis);00471(D-Glutamine and D-glutamate metabolism)	K00261	EC:1.4.1.3	-	253.673	169.899	203.291	64.513	13.8519	23.5407
MD01G1174400	PREDICTED: glutamate dehydrogenase 2 [Pyrus x bretschneideri]	01200(Carbon metabolism);01230(Biosynthesis of amino acids);00010(Glycolysis / Gluconeogenesis);00030(Pentose phosphate pathway);00051(Fructose and mannose metabolism);00052(Galactose metabolism);03018(RNA degradation)	K00850	EC:2.7.1.11	K00261,ko00250,Alanine, aspartate and glutamate metabolism;K00261,ko01200,Carbon metabolism;K00261,ko04964,Proximal tubule bicarbonate reclamation;K00261,ko00220,Arginine biosynthesis;K00261,ko00910,Nitrogen metabolism;K00261,ko00471,D-Glutamine and D-glutamate metabolism	8.69022	2.2826	2.65367	3.20361	0.372752	1.04604
MD01G1177300	PREDICTED: ATP-dependent 6-phosphofructokinase 4, chloroplastic [Malus domestica]	04120(Ubiquitin mediated proteolysis)	K10606	EC:2.3.2.27	K00850,ko04152,AMPK signaling pathway;K00850,ko01230,Biosynthesis of amino acids;K00850,ko00010,Glycolysis / Gluconeogenesis;K00850,ko03018,RNA degradation;K00850,ko00052,Galactose metabolism;K00850,ko00680,Methane metabolism;K00850,ko01200,Carbon metabolism;K00850,ko00051,Fructose and mannose metabolism;K00850,ko00030,Pentose phosphate pathway;K00850,ko05230,Central carbon metabolism in cancer	59.5708	132.542	110.981	3.47161	5.43058	7.76318
MD01G1177400	PREDICTED: putative lipase YOR059C [Malus domestica]	NA	NA	NA	-	16.2042	11.2192	11.9732	4.12396	1.85005	2.50261
MD01G1184500	PREDICTED: protein LOW PSII ACCUMULATION 2, chloroplastic-like [Malus domestica]	00270(Cysteine and methionine metabolism)	K01762	EC:4.4.1.14	-	18.2157	4.89881	4.26778	6.44974	0.739983	1.3631
MD01G1186400	PREDICTED: probable aminotransferase ACS12 [Malus domestica]	NA	NA	NA	-	11.6265	4.51775	4.06362	4.08409	1.21055	1.35181
MD01G1187400	PREDICTED: K(+) efflux antiporter 5 isoform X2 [Malus domestica]	00010(Glycolysis / Gluconeogenesis);00030(Pentose phosphate pathway);00052(Galactose metabolism);00500(Starch and sucrose metabolism);00520(Amino sugar and nucleotide sugar metabolism);00230(Purine metabolism)	K01835	EC:5.4.2.2	-	7.39473	1.61422	1.26492	2.12903	0.561206	0.706713
MD01G1192300	PREDICTED: phosphoglucomutase, chloroplastic-like isoform X2 [Malus domestica]	00040(Pentose and glucuronate interconversions);00051(Fructose and mannose metabolism)	K00008	EC:1.1.1.14	K01835,ko00500,Starch and sucrose metabolism;K01835,ko00230,Purine metabolism;K01835,ko00010,Glycolysis / Gluconeogenesis;K01835,ko00052,Galactose metabolism;K01835,ko00520,Amino sugar and nucleotide sugar metabolism;K01835,ko00030,Pentose phosphate pathway;K01835,ko00521,Streptomycin biosynthesis	44.0082	22.0752	23.4557	5.51696	5.19372	8.99073
MD01G1195200	sorbitol dehydrogenase-like [Malus domestica]	01200(Carbon metabolism);00630(Glyoxylate and dicarboxylate metabolism);00380(Tryptophan metabolism);04146(Peroxisome)	K03781	EC:1.11.1.6	K00008,ko00040,Pentose and glucuronate interconversions;K00008,ko00051,Fructose and mannose metabolism	170.836	178.024	216.268	0.972682	0.245649	0.308833
MD01G1196400	PREDICTED: traB domain-containing protein isoform X2 [Malus domestica]	00240(Pyrimidine metabolism);00760(Nicotinate and nicotinamide metabolism)	K01240	EC:3.2.2.3	-	4.86583	4.16416	3.23704	1.32954	0.993958	2.09602
MD01G1198000	PREDICTED: RHOMBOID-like protein 2 [Malus domestica]	00903(Limonene and pinene degradation);00945(Stilbenoid, diarylheptanoid and gingerol biosynthesis)	K00517	NA	-	17.624	62.4023	80.2916	2.4765	6.58899	16.736
MD01G1204300	PREDICTED: cytochrome P450 89A2-like [Malus domestica]	NA	NA	NA	-	19.3249	12.5013	9.42061	1.76115	2.78376	4.32962
MD01G1208100	PREDICTED: putative septum site-determining protein minD homolog, chloroplastic [Malus domestica]	00100(Steroid biosynthesis)	K07748	EC:1.1.1.170	-	9.14862	16.6875	16.7116	1.76633	2.76852	6.44431
MD01G1211100	PREDICTED: reticulon-like protein B1 [Pyrus x bretschneideri]	04075(Plant hormone signal transduction);04626(Plant-pathogen interaction)	K13416	EC:2.7.10.1;EC:2.7.11.1	-	10.6043	8.65285	9.04438	0.909747	0.354319	0.754209
MD01G1214100	PREDICTED: probable inactive receptor kinase At4g23740 [Malus domestica]	NA	NA	NA	-	3.21712	0.914637	1.69499	0.599827	0.109073	0.174131
MD01G1219800	PREDICTED: probable plastid-lipid-associated protein 14, chloroplastic [Malus domestica]	NA	NA	NA	-	17.0298	13.0576	12.115	4.68557	1.64684	1.84646
MD01G1228300	PREDICTED: NDR1/HIN1-like protein 12 [Malus domestica]	NA	NA	NA	-	8.03452	5.06975	2.09354	2.25819	0	0
MD01G1229800	PREDICTED: IAA-amino acid hydrolase ILR1-like 5 [Malus domestica]	00520(Amino sugar and nucleotide sugar metabolism)	K01183	EC:3.2.1.14	-	25.7672	12.036	12.5559	8.65153	5.81596	6.55325
MD01G1230400	PREDICTED: L-type lectin-domain containing receptor kinase VIII.2-like [Malus domestica]	NA	NA	NA	-	20.8399	16.3277	11.5405	2.35874	3.61501	4.23088
MD02G1003700	PREDICTED: acyl-coenzyme A thioesterase 9, mitochondrial-like [Malus domestica]	00520(Amino sugar and nucleotide sugar metabolism)	K01183	EC:3.2.1.14	-	13.6812	23.9326	26.2888	3.74019	2.64958	4.97377
MD02G1011200	PREDICTED: cysteine-rich receptor-like protein kinase 25 [Pyrus x bretschneideri]	NA	NA	NA	-	10.0859	3.56037	2.92651	4.14152	0.683653	1.38611
MD02G1012300	PREDICTED: uncharacterized protein LOC103406702 [Malus domestica]	NA	NA	NA	-	48.7358	12.8944	15.3152	18.0954	3.72363	4.24412
MD02G1012900	PREDICTED: homeobox protein knotted-1-like 3 isoform X2 [Malus domestica]	00592(alpha-Linolenic acid metabolism)	K18858	EC:2.3.1.195	-	108.895	158.696	158.256	39.0705	76.5568	76.0763
MD02G1013900	PREDICTED: methanol O-anthraniloyltransferase-like [Malus domestica]	00592(alpha-Linolenic acid metabolism)	K18858	EC:2.3.1.195	-	19.6454	33.2039	47.2465	6.27035	5.8121	9.42095
MD02G1014800	alcohol acyl transferase [Malus domestica]	00052(Galactose metabolism)	K06617	EC:2.4.1.82	-	89.8285	35.0698	57.7616	17.8928	6.17219	9.43396
MD02G1025500	PREDICTED: probable galactinol--sucrose galactosyltransferase 6 isoform X1 [Pyrus x bretschneideri]	00052(Galactose metabolism)	K06617	EC:2.4.1.82	K06617,ko00052,Galactose metabolism	72.808	29.6625	28.2642	2.08595	0.459918	0.195798
MD02G1025600	PREDICTED: probable galactinol--sucrose galactosyltransferase 6 [Malus domestica]	00052(Galactose metabolism)	K06617	EC:2.4.1.82	K06617,ko00052,Galactose metabolism	81.6488	55.3441	52.8375	1.76431	0.868655	0.291222
MD02G1026200	PREDICTED: probable galactinol--sucrose galactosyltransferase 6 isoform X1 [Pyrus x bretschneideri]	00052(Galactose metabolism)	K06617	EC:2.4.1.82	K06617,ko00052,Galactose metabolism	57.9191	37.6867	34.0157	1.50328	0.837163	0.292359
MD02G1026300	PREDICTED: probable galactinol--sucrose galactosyltransferase 6 [Malus domestica]	NA	NA	NA	K06617,ko00052,Galactose metabolism	67.3329	56.724	51.0336	2.1168	0.880859	0.575287
MD02G1028100	PREDICTED: WD repeat-containing protein 11-like isoform X2 [Pyrus x bretschneideri]	NA	NA	NA	-	2.67158	0.538688	0.627661	0.69374	0.0652975	0.240565
MD02G1030400	PREDICTED: uncharacterized protein LOC103953940 [Pyrus x bretschneideri]	NA	NA	NA	-	17.489	9.51035	5.73955	3.83949	1.3881	2.77006
MD02G1034700	PREDICTED: uncharacterized protein LOC103448273 [Malus domestica]	00520(Amino sugar and nucleotide sugar metabolism)	K00326	EC:1.6.2.2	-	11.4704	5.0056	4.90372	3.57236	1.63976	2.20878
MD02G1035100	PREDICTED: NADH-cytochrome b5 reductase-like protein [Pyrus x bretschneideri]	NA	NA	NA	K00326,ko00520,Amino sugar and nucleotide sugar metabolism	12.4314	2.57331	2.69089	2.34209	0.713226	0.960724
MD02G1035500	PREDICTED: uncharacterized protein LOC103448302 isoform X1 [Malus domestica]	NA	NA	NA	-	113.789	44.6195	59.8893	26.1175	14.1623	19.6154
MD02G1037700	PREDICTED: uncharacterized protein LOC103426706 [Malus domestica]	02010(ABC transporters)	K05681	NA	-	50.3716	14.3865	12.7915	3.8485	2.38068	1.60797
MD02G1040300	putative ABC transporter [Malus domestica]	00860(Porphyrin and chlorophyll metabolism)	K13606	EC:1.1.1.294	-	6.12145	8.30707	10.6888	2.53909	1.18711	1.13822
MD02G1045900	PREDICTED: probable chlorophyll(ide) b reductase NYC1, chloroplastic [Pyrus x bretschneideri]	01200(Carbon metabolism);00640(Propanoate metabolism);00280(Valine, leucine and isoleucine degradation);00410(beta-Alanine metabolism)	K05605	EC:3.1.2.4	-	46.6497	63.4981	44.9943	16.3303	8.17606	9.94785
MD02G1056400	PREDICTED: strigolactone esterase D14-like [Malus domestica]	NA	NA	NA	-	44.5605	7.64312	8.65103	3.19726	0.449165	0.497968
MD02G1063900	PREDICTED: probable serine incorporator [Malus domestica]	NA	NA	NA	-	9.5463	12.363	10.5161	2.141	1.2628	2.35524
MD02G1064500	PREDICTED: uncharacterized protein LOC103452970 [Malus domestica]	NA	NA	NA	-	3.58888	1.41061	1.31023	0.748586	0.611031	0.712855
MD02G1064700	PREDICTED: uncharacterized protein LOC103452970 [Malus domestica]	NA	NA	NA	-	3.58913	1.4477	1.25246	1.05624	0.564923	0.796416
MD02G1065600	PREDICTED: uncharacterized protein LOC103449718 [Malus domestica]	01200(Carbon metabolism);01230(Biosynthesis of amino acids);00010(Glycolysis / Gluconeogenesis);00030(Pentose phosphate pathway);00051(Fructose and mannose metabolism);00052(Galactose metabolism);03018(RNA degradation)	K00850	EC:2.7.1.11	-	28.4747	11.925	11.2416	2.95983	0.951128	1.7431
MD02G1068900	PREDICTED: ATP-dependent 6-phosphofructokinase 3-like [Malus domestica]	00590(Arachidonic acid metabolism);00430(Taurine and hypotaurine metabolism);00460(Cyanoamino acid metabolism);00480(Glutathione metabolism)	K18592	EC:2.3.2.2;EC:3.4.19.13	K00850,ko04152,AMPK signaling pathway;K00850,ko01230,Biosynthesis of amino acids;K00850,ko00010,Glycolysis / Gluconeogenesis;K00850,ko03018,RNA degradation;K00850,ko00052,Galactose metabolism;K00850,ko00680,Methane metabolism;K00850,ko01200,Carbon metabolism;K00850,ko00051,Fructose and mannose metabolism;K00850,ko00030,Pentose phosphate pathway;K00850,ko05230,Central carbon metabolism in cancer	12.2115	3.89879	2.52721	0.89052	0.0701102	0
MD02G1069100	PREDICTED: gamma-glutamyltranspeptidase 3 [Malus domestica]	00564(Glycerophospholipid metabolism);00565(Ether lipid metabolism);00590(Arachidonic acid metabolism);00591(Linoleic acid metabolism);00592(alpha-Linolenic acid metabolism)	K01047	EC:3.1.1.4	-	9.03406	13.4779	16.0124	3.07021	3.82834	3.79636
MD02G1073600	PREDICTED: probable phospholipase A2 homolog 1 [Malus domestica]	NA	NA	NA	-	6.879	4.94233	5.0919	1.11142	0.164682	0.328634
MD02G1091400	PREDICTED: uncharacterized protein LOC103929720 [Pyrus x bretschneideri]	04144(Endocytosis)	K18443	NA	-	2.37696	0.874539	0.84125	0.90513	0.330256	0.415201
MD02G1093500	PREDICTED: subtilisin-like protease SBT1.8 [Malus domestica]	NA	NA	NA	-	3.64398	1.63915	2.45142	1.27572	0.44568	1.12656
MD02G1094000	PREDICTED: uncharacterized protein LOC103929707 isoform X2 [Pyrus x bretschneideri]	00270(Cysteine and methionine metabolism)	K08963	EC:5.3.1.23	-	10.9367	18.3231	17.1077	0.942157	2.80563	5.19354
MD02G1094700	PREDICTED: methylthioribose-1-phosphate isomerase-like [Malus domestica]	NA	NA	NA	K08963,ko00270,Cysteine and methionine metabolism	22.9166	16.2637	18.8741	6.63471	6.15473	6.94867
MD02G1105400	PREDICTED: uncharacterized protein LOC103454169 [Malus domestica]	NA	NA	NA	-	3.60592	0.603358	0.608376	1.49221	0.126582	0.0909377
MD02G1111100	PREDICTED: UPF0183 protein At3g51130 [Malus domestica]	NA	NA	NA	-	19.3916	4.13847	3.7027	5.43508	1.72791	1.779
MD02G1113600	PREDICTED: uncharacterized protein LOC103959201, partial [Pyrus x bretschneideri]	NA	NA	NA	-	94.2427	30.8173	30.5717	33.4774	7.3624	8.45967
MD02G1113800	PREDICTED: protein PIN-LIKES 5-like [Malus domestica]	NA	NA	NA	-	4.57495	3.01816	1.56165	1.2126	0.012594	0.0904763
MD02G1114900	PREDICTED: WUSCHEL-related homeobox 13-like [Malus domestica]	03410(Base excision repair)	K10802	NA	-	10.9101	19.2267	21.4282	4.18781	2.99647	4.53404
MD02G1116500	hypothetical protein PRUPE_ppa011596mg [Prunus persica]	NA	NA	NA	-	77.1634	264.841	268.888	30.353	88.204	122.613
MD02G1122200	PREDICTED: ganglioside-induced differentiation-associated protein 2 [Pyrus x bretschneideri]	00061(Fatty acid biosynthesis)	K10782	EC:3.1.2.14	-	6.06013	1.32701	1.26446	1.28434	0.208802	0.32501
MD02G1127500	PREDICTED: oleoyl-acyl carrier protein thioesterase 1, chloroplastic-like isoform X2 [Malus domestica]	00511(Other glycan degradation)	K01191	EC:3.2.1.24	-	34.415	49.3364	56.9821	6.59948	20.5804	29.9454
MD02G1128700	PREDICTED: alpha-mannosidase-like [Malus domestica]	03013(RNA transport)	K14297	NA	-	65.6835	56.1298	49.9071	4.4302	4.90446	6.08647
MD02G1130200	PREDICTED: thaumatin-like protein 1 [Pyrus x bretschneideri]	04141(Protein processing in endoplasmic reticulum)	K09518	NA	-	7.03029	0.587898	0.624595	1.93902	0.129957	0.220438
MD02G1131800	PREDICTED: chaperone protein dnaJ 11, chloroplastic-like [Malus domestica]	00051(Fructose and mannose metabolism);00520(Amino sugar and nucleotide sugar metabolism)	K01711	EC:4.2.1.47	-	282.86	209.281	173.411	43.8925	49.362	59.2177
MD02G1134100	PREDICTED: GDP-mannose 4,6 dehydratase 1 [Malus domestica]	NA	NA	NA	K01711,ko00051,Fructose and mannose metabolism;K01711,ko00520,Amino sugar and nucleotide sugar metabolism	6.68543	4.83424	5.77599	2.81625	0.938538	1.09635
MD02G1135900	PREDICTED: protein FMP32, mitochondrial-like [Pyrus x bretschneideri]	00590(Arachidonic acid metabolism);04146(Peroxisome)	K08726	EC:3.3.2.10;EC:3.1.3.76	-	3.32964	3.71668	3.75548	1.16451	1.21476	2.2407
MD02G1138500	PREDICTED: bifunctional epoxide hydrolase 2-like [Malus domestica]	00590(Arachidonic acid metabolism);04146(Peroxisome)	K08726	EC:3.3.2.10;EC:3.1.3.76	-	33.0998	15.2205	15.5465	12.5627	4.97304	5.38904
MD02G1138600	PREDICTED: bifunctional epoxide hydrolase 2-like [Malus domestica]	NA	NA	NA	-	21.5584	7.52303	5.71448	6.30722	0.736543	1.74279
MD02G1140200	cold-shock protein CS120-like [Malus domestica]	NA	NA	NA	-	51.168	132.486	86.2943	14.523	4.17635	5.08185
MD02G1144100	PREDICTED: gamma carbonic anhydrase 1, mitochondrial [Malus domestica]	NA	NA	NA	-	17.6565	5.66827	6.58416	5.36242	1.63216	2.59499
MD02G1148100	PREDICTED: CRAL-TRIO domain-containing protein C23B6.04c-like [Pyrus x bretschneideri]	NA	NA	NA	-	21.1904	15.1519	13.58	1.62058	0.427665	0.600349
MD02G1151000	PREDICTED: probable polyol transporter 6 [Malus domestica]	00900(Terpenoid backbone biosynthesis)	K13789	EC:2.5.1.1;EC:2.5.1.10	-	4.04737	0.535265	1.33723	0.795158	0.261586	0.341682
MD02G1154400	PREDICTED: geranylgeranyl pyrophosphate synthase, chloroplastic-like [Malus domestica]	NA	NA	NA	-	211.339	105.625	105.584	20.8826	7.626	14.5049
MD02G1155000	PREDICTED: calcium uniporter protein 2, mitochondrial [Malus domestica]	00062(Fatty acid elongation)	K10249	EC:2.3.1.199	-	24.406	14.7249	17.0692	2.89789	0.364088	0.594463
MD02G1155100	PREDICTED: elongation of fatty acids protein 3-like [Malus domestica]	NA	NA	NA	-	9.3143	15.3062	15.8143	1.8139	1.31422	2.24381
MD02G1158600	PREDICTED: thioredoxin-like protein HCF164, chloroplastic [Malus domestica]	NA	NA	NA	-	10.8665	2.00212	1.16281	1.46785	0.378034	0.452637
MD02G1171800	heat shock factor protein HSF24 [Malus domestica]	00906(Carotenoid biosynthesis)	K09838	EC:1.14.13.90	-	7.8367	14.8479	7.63426	3.17647	4.78547	2.58879
MD02G1172400	PREDICTED: zeaxanthin epoxidase, chloroplastic-like [Malus domestica]	NA	NA	NA	-	104.413	72.5471	87.3344	13.7642	7.96725	12.0405
MD02G1173900	PREDICTED: PI-PLC X domain-containing protein At5g67130-like [Malus domestica]	00940(Phenylpropanoid biosynthesis);00945(Stilbenoid, diarylheptanoid and gingerol biosynthesis);00941(Flavonoid biosynthesis)	K13065	EC:2.3.1.133	-	11.8107	3.60522	4.29513	2.63854	0.684217	1.4713
MD02G1175500	PREDICTED: uncharacterized acetyltransferase At3g50280-like [Malus domestica]	04145(Phagosome)	K01365	EC:3.4.22.15	-	1178.86	840.563	710.586	111.105	147.393	361.008
MD02G1177700	PREDICTED: cysteine proteinase COT44-like [Malus domestica]	00010(Glycolysis / Gluconeogenesis);00040(Pentose and glucuronate interconversions);00053(Ascorbate and aldarate metabolism);00620(Pyruvate metabolism);00071(Fatty acid degradation);00561(Glycerolipid metabolism);00280(Valine, leucine and isoleucine degradation);00310(Lysine degradation);00330(Arginine and proline metabolism);00340(Histidine metabolism);00380(Tryptophan metabolism);00410(beta-Ala…	K00128	EC:1.2.1.3	-	1242.47	588.599	573.776	273.687	37.5526	81.5952
MD02G1181600	PREDICTED: probable protein phosphatase 2C 78 [Malus domestica]	NA	NA	NA	-	10.0772	10.4565	11.0059	3.47022	3.22943	5.2201
MD02G1184200	PREDICTED: formin-like protein 6 [Malus domestica]	04626(Plant-pathogen interaction)	K18875	NA	-	16.7693	5.61513	4.75808	5.54931	0.856212	1.37759
MD02G1184300	PREDICTED: formin-like protein 6 [Malus domestica]	00010(Glycolysis / Gluconeogenesis);00620(Pyruvate metabolism);00640(Propanoate metabolism);00270(Cysteine and methionine metabolism)	K00016	EC:1.1.1.27	-	18.1853	20.6443	15.9608	5.57666	2.51992	4.28337
MD02G1188100	PREDICTED: LOW QUALITY PROTEIN: galactomannan galactosyltransferase 1-like [Pyrus x bretschneideri]	00750(Vitamin B6 metabolism)	K05275	EC:1.1.1.65	-	12.4169	26.3749	34.4996	2.30569	2.11123	2.85501
MD02G1192800	homeobox-leucine zipper protein HAT22-like [Malus domestica]	NA	NA	NA	-	6.05961	6.96431	6.78526	2.27116	0.753864	0.984693
MD02G1198100	PREDICTED: structural maintenance of chromosomes protein 4 [Malus domestica]	NA	NA	NA	K06675,ko04111,Cell cycle - yeast	6.82682	7.45865	6.13007	1.40227	2.29051	3.84973
MD02G1223400	PREDICTED: 10 kDa chaperonin-like isoform X2 [Malus domestica]	00740(Riboflavin metabolism)	K00861	EC:2.7.1.26	-	37.4009	21.7605	22.7995	6.62444	5.96801	9.27118
MD02G1226100	PREDICTED: haloacid dehalogenase-like hydrolase domain-containing protein Sgpp [Pyrus x bretschneideri]	01200(Carbon metabolism);00620(Pyruvate metabolism);00710(Carbon fixation in photosynthetic organisms)	K00028	EC:1.1.1.39	-	10.8325	5.46692	6.01681	1.81822	0.754153	1.46735
MD02G1226700	PREDICTED: LOW QUALITY PROTEIN: NAD-dependent malic enzyme 62 kDa isoform, mitochondrial-like [Malus domestica]	00520(Amino sugar and nucleotide sugar metabolism)	K01183	EC:3.2.1.14	K00028,ko00710,Carbon fixation in photosynthetic organisms;K00028,ko00620,Pyruvate metabolism;K00028,ko01200,Carbon metabolism	17.749	13.035	12.0035	3.14059	4.1129	4.82429
MD02G1247100	PREDICTED: rust resistance kinase Lr10-like isoform X2 [Malus domestica]	00520(Amino sugar and nucleotide sugar metabolism)	K01183	EC:3.2.1.14	-	8.1567	4.56896	4.33589	2.63917	1.16597	1.14223
MD02G1247200	PREDICTED: rust resistance kinase Lr10-like [Malus domestica]	00942(Anthocyanin biosynthesis)	K12937	EC:2.4.1.254	-	13.5941	13.1313	8.58332	2.96568	1.32556	0.995581
MD02G1248200	PREDICTED: beta-D-glucosyl crocetin beta-1,6-glucosyltransferase-like [Malus domestica]	03015(mRNA surveillance pathway)	K14404	NA	-	81.7315	89.2106	38.3766	0.902246	0.146889	0.386929
MD02G1262000	PREDICTED: uncharacterized protein At2g38710 [Malus domestica]	00860(Porphyrin and chlorophyll metabolism)	K13606	EC:1.1.1.294	-	9.9409	1.61589	1.75968	2.95001	0.433057	0.895623
MD02G1262200	chlorophyll(ide) b reductase NOL, chloroplastic [Pyrus x bretschneideri]	NA	NA	NA	K13606,ko00860,Porphyrin and chlorophyll metabolism	6.22466	1.60367	1.60478	2.04438	0.802013	0.470344
MD02G1263000	PREDICTED: phospholipid-transporting ATPase 1-like [Malus domestica]	NA	NA	NA	-	6.47409	5.69601	5.06796	2.72935	0.936883	1.87153
MD02G1293900	PREDICTED: uncharacterized protein LOC103415751 isoform X1 [Malus domestica]	NA	NA	NA	-	10.7103	13.0137	12.593	3.82135	4.65241	5.29507
MD02G1299000	PREDICTED: pheophytinase, chloroplastic-like [Pyrus x bretschneideri]	03013(RNA transport);03008(Ribosome biogenesis in eukaryotes)	K07562	NA	-	9.4062	5.12502	3.60104	0.857536	0.203725	0.108413
MD02G1301900	PREDICTED: protein RETICULATA-RELATED 4, chloroplastic-like [Malus domestica]	00591(Linoleic acid metabolism);00592(alpha-Linolenic acid metabolism)	K00454	EC:1.13.11.12	-	17.8359	8.1473	6.79701	7.58538	1.44432	1.8014
MD02G1317800	lipoxygenase [Malus domestica]	00260(Glycine, serine and threonine metabolism);00350(Tyrosine metabolism);00360(Phenylalanine metabolism);00410(beta-Alanine metabolism);00950(Isoquinoline alkaloid biosynthesis);00960(Tropane, piperidine and pyridine alkaloid biosynthesis)	K00276	EC:1.4.3.21	-	30.0685	64.4675	140.118	2.90636	0.750808	0.655328
MD02G1318100	PREDICTED: G-type lectin S-receptor-like serine/threonine-protein kinase LECRK3 [Malus domestica]	NA	NA	NA	-	1.5154	0.656551	0.759107	0.43922	0.0550969	0.06597
MD02G1318500	PREDICTED: protein N-terminal asparagine amidohydrolase-like isoform X1 [Malus domestica]	00500(Starch and sucrose metabolism)	K00706	EC:2.4.1.34	-	7.0232	1.47301	1.43562	2.04771	0.640079	0.821138
MD02G1319100	PREDICTED: callose synthase 1-like [Malus domestica]	00640(Propanoate metabolism);00280(Valine, leucine and isoleucine degradation)	K00167	EC:1.2.4.4	-	59.1033	47.9321	40.7423	24.0134	20.5775	21.4803
MD03G1002200	PREDICTED: 2-oxoisovalerate dehydrogenase subunit beta 1, mitochondrial [Malus domestica]	04145(Phagosome)	K07374	NA	K00167,ko00640,Propanoate metabolism;K00167,ko00280,Valine, leucine and isoleucine degradation	6.10704	1.31267	0.912716	1.54495	0.474763	0.501578
MD03G1004400	PREDICTED: tubulin alpha-3 chain [Malus domestica]	04120(Ubiquitin mediated proteolysis)	K04506	EC:2.3.2.27	K07374,ko04145,Phagosome;K07374,ko04210,Apoptosis;K07374,ko05130,Pathogenic Escherichia coli infection;K07374,ko04540,Gap junction	47.0552	23.0198	21.3059	17.5573	6.26229	9.79549
MD03G1012000	PREDICTED: E3 ubiquitin-protein ligase SINAT2 [Malus domestica]	01200(Carbon metabolism);00670(One carbon pool by folate)	K01938	EC:6.3.4.3	K04506,ko04115,p53 signaling pathway;K04506,ko04013,MAPK signaling pathway - fly;K04506,ko04120,Ubiquitin mediated proteolysis;K04506,ko04310,Wnt signaling pathway	21.199	5.85443	6.00365	6.51508	1.28418	1.32793
MD03G1012400	PREDICTED: formate--tetrahydrofolate ligase [Pyrus x bretschneideri]	00260(Glycine, serine and threonine metabolism);00350(Tyrosine metabolism);00360(Phenylalanine metabolism);00410(beta-Alanine metabolism);00950(Isoquinoline alkaloid biosynthesis);00960(Tropane, piperidine and pyridine alkaloid biosynthesis)	K00276	EC:1.4.3.21	-	24.9632	11.4928	11.6019	3.26015	1.92892	3.90163
MD03G1019800	PREDICTED: G-type lectin S-receptor-like serine/threonine-protein kinase RLK1 [Malus domestica]	NA	NA	NA	-	3.4261	2.81205	2.1564	0.948712	0	0.198154
MD03G1032600	PREDICTED: mediator of RNA polymerase II transcription subunit 15a [Pyrus x bretschneideri]	NA	NA	NA	-	2.72115	2.12732	1.80877	1.03448	0.781637	1.04854
MD03G1034800	PREDICTED: E3 ubiquitin-protein ligase At4g11680-like [Malus domestica]	00900(Terpenoid backbone biosynthesis)	K00787	EC:2.5.1.1;EC:2.5.1.10	-	10.8014	3.79132	2.74158	0.973718	0.565902	0.948611
MD03G1034900	PREDICTED: farnesyl pyrophosphate synthase 2-like isoform X1 [Malus domestica]	NA	NA	NA	K00787,ko00900,Terpenoid backbone biosynthesis;K00787,ko05166,HTLV-I infection;K00787,ko05164,Influenza A	95.6309	17.0438	24.5889	26.453	7.49301	7.03278
MD03G1039200	PREDICTED: BTB/POZ domain-containing protein At1g55760 isoform X2 [Malus domestica]	NA	NA	NA	K10523,ko04341,Hedgehog signaling pathway - fly;K10523,ko04340,Hedgehog signaling pathway	17.0358	7.47137	7.31498	7.17964	1.95275	4.21205
MD03G1044800	PREDICTED: uncharacterized protein LOC103425631 [Malus domestica]	04120(Ubiquitin mediated proteolysis)	K10684	EC:6.2.1.45	-	5.17141	4.32773	1.84816	2.06945	0.461448	0.322299
MD03G1047800	PREDICTED: cytochrome b-c1 complex subunit 8 [Malus domestica]	NA	NA	NA	-	7.33109	33.1416	26.8047	1.63336	6.30749	8.18822
MD03G1048900	root phototropism protein 2-like [Malus domestica]	03040(Spliceosome)	K12818	EC:3.6.4.13	-	121.501	66.3429	60.8791	17.0664	10.042	22.1833
MD03G1052500	PREDICTED: putative disease resistance protein RGA1 [Pyrus x bretschneideri]	01212(Fatty acid metabolism);00061(Fatty acid biosynthesis)	K00645	NA	-	3.10058	2.01972	1.69392	1.06489	0.54519	0.550578
MD03G1055800	PREDICTED: malonyl CoA-acyl carrier protein transacylase [Malus domestica]	00940(Phenylpropanoid biosynthesis)	K00430	EC:1.11.1.7	K00645,ko01212,Fatty acid metabolism;K00645,ko00061,Fatty acid biosynthesis	81.2523	68.5121	75.3457	6.05182	5.75909	9.66773
MD03G1059200	PREDICTED: peroxidase 4-like [Malus domestica]	00250(Alanine, aspartate and glutamate metabolism)	K01953	EC:6.3.5.4	K00430,ko00940,Phenylpropanoid biosynthesis	73.8392	5.13756	6.00449	26.8149	2.10542	2.47924
MD03G1066000	PREDICTED: asparagine synthetase [glutamine-hydrolyzing]-like [Pyrus x bretschneideri]	NA	NA	NA	K01953,ko00250,Alanine, aspartate and glutamate metabolism	93.1313	61.8401	39.6618	6.394	5.95003	7.28722
MD03G1070000	PREDICTED: uncharacterized protein LOC103418723 isoform X1 [Malus domestica]	NA	NA	NA	-	2.57493	2.82478	3.19715	1.03802	0.636065	0.634658
MD03G1071900	PREDICTED: villin-1 [Malus domestica]	03010(Ribosome)	K02926	NA	-	3.66742	2.60799	3.19056	0.421258	0.436203	0.922161
MD03G1073800	PREDICTED: LOW QUALITY PROTEIN: 50S ribosomal protein L4, chloroplastic-like [Malus domestica]	01200(Carbon metabolism);01230(Biosynthesis of amino acids);00010(Glycolysis / Gluconeogenesis);03018(RNA degradation)	K01689	EC:4.2.1.11	K02926,ko03010,Ribosome	229.124	558.101	516.84	32.3244	225.597	282.954
MD03G1078500	PREDICTED: cytosolic enolase 3 [Malus domestica]	00565(Ether lipid metabolism);00600(Sphingolipid metabolism)	K04628	EC:2.4.1.45	K01689,ko00680,Methane metabolism;K01689,ko00010,Glycolysis / Gluconeogenesis;K01689,ko03018,RNA degradation;K01689,ko04066,HIF-1 signaling pathway;K01689,ko01200,Carbon metabolism;K01689,ko01230,Biosynthesis of amino acids	9.75899	7.35322	7.35552	3.83931	3.10538	4.28927
MD03G1082200	PREDICTED: UDP-glycosyltransferase 76E2-like [Malus domestica]	03050(Proteasome)	K06700	NA	-	47.6425	35.7578	32.5195	4.58489	2.45012	1.93919
MD03G1083100	PREDICTED: uncharacterized protein LOC103448526 [Malus domestica]	NA	NA	NA	-	4.83812	1.40072	1.4478	1.62032	0.609648	0.558204
MD03G1100400	PREDICTED: uncharacterized protein LOC103427173 [Malus domestica]	NA	NA	NA	-	5.23829	1.20174	1.94623	1.2112	0.593454	0.292587
MD03G1100700	PREDICTED: UDP-galactose/UDP-glucose transporter 5B [Malus domestica]	00062(Fatty acid elongation)	K15397	EC:2.3.1.199	-	5.14677	1.11118	0.817602	1.65853	0.0680461	0.190107
MD03G1102500	PREDICTED: 3-ketoacyl-CoA synthase 12-like [Pyrus x bretschneideri]	NA	NA	NA	K15397,ko00062,Fatty acid elongation	7.36882	5.96257	6.83635	1.35328	0.612104	0.8376
MD03G1105200	PREDICTED: exonuclease V, chloroplastic [Malus domestica]	NA	NA	NA	-	7.68802	3.52686	3.72674	1.95344	1.04596	1.43606
MD03G1111800	PREDICTED: uncharacterized protein LOC103427185 [Malus domestica]	NA	NA	NA	-	24.3653	34.236	43.204	9.47569	13.7993	21.086
MD03G1112400	PREDICTED: uncharacterized protein LOC103422685 isoform X1 [Malus domestica]	00900(Terpenoid backbone biosynthesis)	K03526	EC:1.17.7.1;EC:1.17.7.3	-	7.35576	15.5079	13.4821	1.68466	4.43615	6.73153
MD03G1117300	PREDICTED: 4-hydroxy-3-methylbut-2-en-1-yl diphosphate synthase (ferredoxin), chloroplastic [Malus domestica]	04075(Plant hormone signal transduction)	K14491	NA	K03526,ko00900,Terpenoid backbone biosynthesis	264.315	304.423	297.793	64.8104	95.8402	105.903
MD03G1125100	PREDICTED: uncharacterized protein LOC103423270 [Malus domestica]	NA	NA	NA	-	10.6172	33.9596	32.4797	4.2153	13.0593	18.0885
MD03G1126900	PREDICTED: protein enabled homolog [Malus domestica]	NA	NA	NA	-	3.75428	2.17074	1.74785	0.721998	0.596179	0.178458
MD03G1127700	PREDICTED: uncharacterized protein LOC103440988 [Malus domestica]	03010(Ribosome)	K02939	NA	-	12.9876	16.8918	16.5397	4.43913	2.35614	2.68836
MD03G1128600	PREDICTED: 50S ribosomal protein L9, chloroplastic-like [Malus domestica]	NA	NA	NA	K02939,ko03010,Ribosome	52.0967	157.219	146.99	12.3163	44.8731	72.613
MD03G1128800	zinc finger protein ZAT5-like [Malus domestica]	04146(Peroxisome)	K04565	EC:1.15.1.1	-	131.529	102.788	93.9747	27.3659	23.513	27.1742
MD03G1128900	PREDICTED: superoxide dismutase [Cu-Zn], chloroplastic [Malus domestica]	NA	NA	NA	-	123.466	162.991	87.8215	30.411	35.2871	27.9339
MD03G1130600	PREDICTED: protein argonaute 5-like [Malus domestica]	NA	NA	NA	-	4.91475	1.57259	0.925365	0.45915	0.218792	0.104788
MD03G1134500	PREDICTED: uncharacterized protein At4g22758-like [Malus domestica]	NA	NA	NA	-	213.734	62.1079	59.6299	55.8853	21.7228	30.5261
MD03G1141300	PREDICTED: uncharacterized protein LOC103402242 [Malus domestica]	00906(Carotenoid biosynthesis)	K14593	EC:5.3.99.8	-	3.05576	1.0434	1.10302	1.17115	0.539189	0.364182
MD03G1148700	PREDICTED: capsanthin/capsorubin synthase, chromoplastic-like [Malus domestica]	NA	NA	NA	K14593,ko00906,Carotenoid biosynthesis	203.411	220.997	223.5	24.1795	50.018	65.6122
MD03G1157000	PREDICTED: proteasome-associated protein ECM29 homolog isoform X2 [Pyrus x bretschneideri]	NA	NA	NA	-	11.6718	5.03163	5.03388	4.04232	1.83446	2.62191
MD03G1160300	PREDICTED: uncharacterized protein LOC103429499 [Malus domestica]	00500(Starch and sucrose metabolism);00460(Cyanoamino acid metabolism);00940(Phenylpropanoid biosynthesis)	K05349	EC:3.2.1.21	-	29.279	188.909	132.253	10.7534	42.0583	54.3998
MD03G1161800	PREDICTED: beta-glucosidase BoGH3B-like [Malus domestica]	NA	NA	NA	-	4.47977	1.43562	1.49937	1.54313	0.342403	0.409975
MD03G1165300	PREDICTED: uncharacterized protein LOC103447980 [Malus domestica]	00562(Inositol phosphate metabolism);00564(Glycerophospholipid metabolism);00565(Ether lipid metabolism)	K01114	EC:3.1.4.3	-	30.5837	12.7999	13.282	8.73742	4.54788	5.92149
MD03G1165700	PREDICTED: non-specific phospholipase C2-like [Pyrus x bretschneideri]	NA	NA	NA	K01114,ko00562,Inositol phosphate metabolism;K01114,ko00564,Glycerophospholipid metabolism;K01114,ko04919,Thyroid hormone signaling pathway;K01114,ko02024,Quorum sensing;K01114,ko00565,Ether lipid metabolism	25.381	13.1355	14.5293	10.1502	3.72173	6.34256
MD03G1166800	-	NA	NA	NA	-	4.91029	61.561	56.7496	1.32398	12.3511	9.07031
MD03G1166900	PREDICTED: protein LATERAL ROOT PRIMORDIUM 1 [Malus domestica]	00860(Porphyrin and chlorophyll metabolism)	K03404	EC:6.6.1.1	-	5.88135	4.61468	4.00061	1.12996	0.676637	0.840741
MD03G1170000	PREDICTED: magnesium-chelatase subunit ChlD, chloroplastic [Malus domestica]	NA	NA	NA	K03404,ko00860,Porphyrin and chlorophyll metabolism	19.9391	41.3288	36.3043	6.64616	16.1326	19.9022
MD03G1172000	PREDICTED: uncharacterized protein LOC103418956 [Malus domestica]	02010(ABC transporters)	K05681	NA	-	51.9888	83.4386	73.5093	10.7076	8.46623	18.1228
MD03G1172200	PREDICTED: ABC transporter G family member 15-like [Malus domestica]	NA	NA	NA	-	51.9375	49.3057	69.0251	9.08544	7.10693	6.02592
MD03G1175000	PREDICTED: uncharacterized protein LOC103963893 [Pyrus x bretschneideri]	NA	NA	NA	-	23.7987	53.6737	42.7384	4.25428	0.411393	0.682033
MD03G1179100	PREDICTED: protein TIC 20-v, chloroplastic [Pyrus x bretschneideri]	00520(Amino sugar and nucleotide sugar metabolism)	K01183	EC:3.2.1.14	-	11.1045	12.2063	13.7975	3.89653	0.780762	1.79777
MD03G1185600	PREDICTED: uncharacterized protein LOC103326305 [Prunus mume]	03010(Ribosome)	K02946	NA	-	7.31291	8.04241	8.65738	2.49479	3.41111	3.8932
MD03G1187000	PREDICTED: 30S ribosomal protein S10, chloroplastic-like [Malus domestica]	01200(Carbon metabolism);01230(Biosynthesis of amino acids);00920(Sulfur metabolism);00270(Cysteine and methionine metabolism)	K00640	EC:2.3.1.30	K02946,ko03010,Ribosome	28.2819	2.41197	3.28073	4.15864	0.795678	1.20341
MD03G1187100	PREDICTED: serine acetyltransferase 1, chloroplastic [Malus domestica]	02010(ABC transporters)	K05665	NA	-	168.104	125.093	119.719	43.0628	41.5889	52.9997
MD03G1188200	PREDICTED: ABC transporter C family member 3-like [Malus domestica]	00190(Oxidative phosphorylation);04145(Phagosome)	K02153	NA	-	3.91703	0.541672	0.428203	0.822352	0.0181825	0.0653123
MD03G1192100	PREDICTED: V-type proton ATPase subunit e1 [Malus domestica]	03015(mRNA surveillance pathway)	K14407	NA	K02153,ko04145,Phagosome;K02153,ko00190,Oxidative phosphorylation;K02153,ko04966,Collecting duct acid secretion;K02153,ko05120,Epithelial cell signaling in Helicobacter pylori infection;K02153,ko05323,Rheumatoid arthritis;K02153,ko04721,Synaptic vesicle cycle;K02153,ko05110,Vibrio cholerae infection	21.9788	4.11835	4.21155	7.86961	1.33783	1.92222
MD03G1203900	PREDICTED: purple acid phosphatase 18-like [Malus domestica]	04141(Protein processing in endoplasmic reticulum)	K09580	EC:5.3.4.1	-	52.707	15.7139	15.6007	18.3531	3.52765	5.4353
MD03G1209500	PREDICTED: protein disulfide-isomerase 5-3 [Malus domestica]	NA	NA	NA	-	10.9214	4.97712	5.39849	3.27188	1.24183	2.30403
MD03G1217700	PREDICTED: uncharacterized protein LOC103429950 [Malus domestica]	03018(RNA degradation)	K12581	NA	-	8.11603	2.4726	1.79508	1.22941	0.0339541	0.142292
MD03G1222700	PREDICTED: NAC domain-containing protein 72-like [Malus domestica]	00601(Glycosphingolipid biosynthesis - lacto and neolacto series)	K00742	EC:2.4.1.150	-	317.83	94.2271	73.445	7.15944	17.919	19.0642
MD03G1228200	PREDICTED: beta-glucuronosyltransferase GlcAT14A-like [Malus domestica]	NA	NA	NA	-	30.1066	9.25701	8.94073	9.92662	2.79661	2.93924
MD03G1229600	PREDICTED: early nodulin-like protein 2 [Malus domestica]	NA	NA	NA	-	20.7861	1.60595	2.87878	4.42423	0.98831	1.11163
MD03G1235600	PREDICTED: uncharacterized protein LOC103427336 isoform X1 [Malus domestica]	NA	NA	NA	-	4.73914	1.83653	1.19045	1.97422	0.165128	0.593145
MD03G1239400	PREDICTED: uncharacterized protein ycf45-like [Malus domestica]	04075(Plant hormone signal transduction)	K14503	NA	-	22.2001	6.79997	5.37413	3.95352	0.41173	0.389197
MD03G1246200	PREDICTED: BES1/BZR1 homolog protein 4 [Malus domestica]	NA	NA	NA	-	22.8245	5.16404	5.79691	6.81554	0.924333	1.78159
MD03G1259900	PREDICTED: LOW QUALITY PROTEIN: sulfate transporter 3.1 [Malus domestica]	NA	NA	NA	-	378.512	110.568	75.5495	10.3118	11.6538	10.7598
MD03G1263700	PREDICTED: fatty-acid-binding protein 1-like [Malus domestica]	01230(Biosynthesis of amino acids);00260(Glycine, serine and threonine metabolism);00400(Phenylalanine, tyrosine and tryptophan biosynthesis)	K01696	EC:4.2.1.20	-	36.9206	18.4677	22.5315	8.46462	4.08287	6.15418
MD03G1270200	PREDICTED: mitochondrial ubiquitin ligase activator of NFKB 1 [Malus domestica]	NA	NA	NA	-	27.9836	18.0438	16.9877	7.87154	5.79438	7.52492
MD03G1271100	PREDICTED: uncharacterized protein LOC103449078 [Malus domestica]	04075(Plant hormone signal transduction)	K14493	EC:3.-.-.-	-	10.1796	9.36386	7.62206	1.7397	2.13238	4.67017
MD03G1273300	uncharacterized protein LOC103432477 [Malus domestica]	NA	NA	NA	K14493,ko04075,Plant hormone signal transduction	81.0435	57.2831	48.4785	17.6769	15.6043	21.6889
MD03G1275100	PREDICTED: mitochondrial substrate carrier family protein ucpB-like [Malus domestica]	NA	NA	NA	-	12.5913	6.70916	4.82333	1.25721	1.44777	1.85168
MD03G1277000	PREDICTED: sodium/hydrogen exchanger 2-like [Malus domestica]	00500(Starch and sucrose metabolism);00520(Amino sugar and nucleotide sugar metabolism)	K08678	EC:4.1.1.35	-	4.92892	2.39636	2.14852	0.525586	0.118682	0.165787
MD03G1288200	PREDICTED: UDP-glucuronic acid decarboxylase 2 [Malus domestica]	03010(Ribosome)	K02885	NA	-	13.2832	2.29037	2.43563	5.10403	0.12182	0.116688
MD03G1288800	PREDICTED: uncharacterized protein LOC103928383 [Pyrus x bretschneideri]	NA	NA	NA	-	71.3977	67.6495	63.8743	24.0247	15.5767	21.7287
MD03G1290000	PREDICTED: uncharacterized protein At5g01610-like [Malus domestica]	NA	NA	NA	-	56.7279	11.1945	12.9696	21.0935	2.89129	4.72074
MD03G1290200	PREDICTED: uncharacterized protein At5g01610-like [Malus domestica]	04075(Plant hormone signal transduction)	K14509	EC:2.7.13.-	-	36.1268	5.2361	7.91621	9.42839	0.326158	1.17157
MD03G1292200	probable ethylene response sensor 1 [Malus domestica]	01200(Carbon metabolism);00020(Citrate cycle (TCA cycle));00620(Pyruvate metabolism)	K01679	EC:4.2.1.2	K14509,ko04075,Plant hormone signal transduction	37.4445	8.12558	8.00289	2.11297	0.560296	0.880513
MD03G1292300	PREDICTED: fumarate hydratase 1, mitochondrial [Malus domestica]	NA	NA	NA	K01679,ko00720,Carbon fixation pathways in prokaryotes;K01679,ko05211,Renal cell carcinoma;K01679,ko05200,Pathways in cancer;K01679,ko00620,Pyruvate metabolism;K01679,ko00020,Citrate cycle (TCA cycle);K01679,ko01200,Carbon metabolism	48.495	11.7453	11.9892	4.41449	2.51101	4.14016
MD03G1295200	PREDICTED: bZIP transcription factor 53-like [Malus domestica]	00941(Flavonoid biosynthesis);04712(Circadian rhythm - plant)	K00660	EC:2.3.1.74	-	33.0949	8.68821	7.80934	12.4695	3.59344	2.9931
MD04G1003000	polyketide synthase 5 [Malus domestica]	00480(Glutathione metabolism)	K00383	EC:1.8.1.7	-	8.7625	0.735207	1.00471	1.44666	0.244976	0.0977735
MD04G1004900	PREDICTED: glutathione reductase, cytosolic [Malus domestica]	00910(Nitrogen metabolism)	K10534	EC:1.7.1.1;EC:1.7.1.2	K00383,ko00480,Glutathione metabolism;K00383,ko04918,Thyroid hormone synthesis	173.083	240.975	217.051	37.1016	56.0429	69.3967
MD04G1006200	PREDICTED: cytochrome b5-like [Malus domestica]	00500(Starch and sucrose metabolism)	K00696	EC:2.4.1.14	-	38.8472	42.1791	51.5042	9.07221	3.16617	5.01578
MD04G1013500	PREDICTED: probable sucrose-phosphate synthase 2 [Malus domestica]	01212(Fatty acid metabolism);00061(Fatty acid biosynthesis);00071(Fatty acid degradation);04146(Peroxisome)	K01897	EC:6.2.1.3	K00696,ko00500,Starch and sucrose metabolism	11.5418	12.1941	12.0655	0.493562	0.299304	0.895925
MD04G1018700	PREDICTED: probable acyl-activating enzyme 16, chloroplastic isoform X1 [Pyrus x bretschneideri]	03010(Ribosome)	K02945	NA	K01897,ko00071,Fatty acid degradation;K01897,ko02024,Quorum sensing;K01897,ko00061,Fatty acid biosynthesis;K01897,ko01212,Fatty acid metabolism;K01897,ko04146,Peroxisome;K01897,ko03320,PPAR signaling pathway;K01897,ko04920,Adipocytokine signaling pathway	28.4775	22.186	11.6203	5.49384	2.05915	2.30115
MD04G1024000	PREDICTED: 30S ribosomal protein S1 homolog isoform X1 [Malus domestica]	00906(Carotenoid biosynthesis)	K15744	EC:5.2.1.12	-	12.5633	8.20528	6.99238	1.55202	2.14109	3.26424
MD04G1028100	PREDICTED: 15-cis-zeta-carotene isomerase, chloroplastic [Malus domestica]	NA	NA	NA	K15744,ko00906,Carotenoid biosynthesis	48.7635	20.4202	20.6385	8.9209	3.70146	5.66301
MD04G1028200	PREDICTED: aspartic proteinase-like protein 2 [Malus domestica]	00330(Arginine and proline metabolism)	K00472	EC:1.14.11.2	-	6.01501	2.49694	1.99106	2.13092	0.80381	0.666303
MD04G1030700	PREDICTED: prolyl 4-hydroxylase 1 isoform X1 [Malus domestica]	NA	NA	NA	-	7.45744	3.40411	3.59753	2.61352	0.846157	1.26643
MD04G1031000	PREDICTED: uncharacterized protein LOC103932064 isoform X1 [Pyrus x bretschneideri]	NA	NA	NA	-	12.831	12.2228	13.3497	4.36964	3.74581	4.37474
MD04G1042900	hypothetical protein PRUPE_ppa002564mg [Prunus persica]	00940(Phenylpropanoid biosynthesis);00945(Stilbenoid, diarylheptanoid and gingerol biosynthesis);00941(Flavonoid biosynthesis)	K13065	EC:2.3.1.133	-	7.37552	5.31139	5.51639	2.41292	2.00008	2.50364
MD04G1050800	PREDICTED: taxadien-5-alpha-ol O-acetyltransferase [Malus domestica]	03010(Ribosome)	K02884	NA	-	17.0689	16.3356	17.682	3.56211	0.995257	1.04784
MD04G1051500	PREDICTED: 50S ribosomal protein L19-2, chloroplastic-like [Pyrus x bretschneideri]	NA	NA	NA	K02884,ko03010,Ribosome	74.2968	76.5142	71.8223	26.8897	33.9039	40.5426
MD04G1053000	PREDICTED: heptahelical transmembrane protein 4-like [Malus domestica]	NA	NA	NA	K07297,ko04932,Non-alcoholic fatty liver disease (NAFLD);K07297,ko04211,Longevity regulating pathway;K07297,ko04152,AMPK signaling pathway;K07297,ko04920,Adipocytokine signaling pathway	22.3202	6.87511	6.52609	5.09784	2.03679	2.40863
MD04G1057600	PREDICTED: oleosin 18.5 kDa-like [Malus domestica]	NA	NA	NA	-	24.7202	9.6076	18.7836	5.12953	2.92798	2.2864
MD04G1060100	hypothetical protein PRUPE_ppa003859mg [Prunus persica]	00561(Glycerolipid metabolism);00564(Glycerophospholipid metabolism);00565(Ether lipid metabolism)	K13519	EC:2.3.1.51;EC:2.3.1.23	-	29.2036	4.20211	3.89706	3.8424	1.66427	1.63355
MD04G1067300	PREDICTED: lysophospholipid acyltransferase 1-like [Malus domestica]	00650(Butanoate metabolism);00072(Synthesis and degradation of ketone bodies);00280(Valine, leucine and isoleucine degradation);00900(Terpenoid backbone biosynthesis)	K01641	EC:2.3.3.10	-	71.6285	13.7384	14.2343	25.9108	3.95407	6.93139
MD04G1069200	PREDICTED: hydroxymethylglutaryl-CoA synthase [Malus domestica]	00520(Amino sugar and nucleotide sugar metabolism);00523(Polyketide sugar unit biosynthesis)	K12451	EC:5.1.3.-;EC:1.1.1.-	K01641,ko00900,Terpenoid backbone biosynthesis;K01641,ko00650,Butanoate metabolism;K01641,ko00280,Valine, leucine and isoleucine degradation;K01641,ko00072,Synthesis and degradation of ketone bodies	182.497	26.452	40.9647	76.8825	5.37348	6.92882
MD04G1069500	PREDICTED: bifunctional dTDP-4-dehydrorhamnose 3,5-epimerase/dTDP-4-dehydrorhamnose reductase [Malus domestica]	NA	NA	NA	K12451,ko00523,Polyketide sugar unit biosynthesis;K12451,ko00520,Amino sugar and nucleotide sugar metabolism	11.9192	2.02466	2.42916	3.07122	0.128771	0.462551
MD04G1070300	PREDICTED: protein STAY-GREEN, chloroplastic-like [Malus domestica]	04146(Peroxisome)	K04565	EC:1.15.1.1	-	105.247	39.5589	35.7274	33.3361	5.41186	4.15689
MD04G1072900	PREDICTED: copper chaperone for superoxide dismutase, chloroplastic/cytosolic-like isoform X1 [Malus domestica]	00190(Oxidative phosphorylation)	K03885	EC:1.6.99.3	-	41.7367	39.6556	21.7172	14.1092	12.1669	11.6243
MD04G1081700	PREDICTED: alternative NAD(P)H-ubiquinone oxidoreductase C1, chloroplastic/mitochondrial [Malus domestica]	04075(Plant hormone signal transduction)	K14501	EC:3.1.3.16	-	14.7126	7.53212	6.64834	4.40972	2.80792	3.20195
MD04G1083500	PREDICTED: serine/threonine-protein phosphatase PP1 isoform X1 [Malus domestica]	02010(ABC transporters)	K05658	EC:3.6.3.44	K06269,ko04113,Meiosis - yeast;K06269,ko04024,cAMP signaling pathway;K06269,ko03015,mRNA surveillance pathway;K06269,ko04114,Oocyte meiosis;K06269,ko04390,Hippo signaling pathway;K06269,ko05031,Amphetamine addiction;K06269,ko04810,Regulation of actin cytoskeleton;K06269,ko04611,Platelet activation;K06269,ko04750,Inflammatory mediator regulation of TRP channels;K06269,ko04921,Oxytocin signaling pa…	10.1252	2.77325	2.68446	2.12168	0.349091	1.11462
MD04G1092800	PREDICTED: ABC transporter B family member 1-like [Malus domestica]	00620(Pyruvate metabolism)	K01512	EC:3.6.1.7	K05658,ko04976,Bile secretion;K05658,ko05206,MicroRNAs in cancer;K05658,ko02010,ABC transporters	63.7685	49.8496	46.2338	18.2122	9.91267	17.8033
MD04G1093600	hypothetical protein PRUPE_ppa011449mg [Prunus persica]	01200(Carbon metabolism);01230(Biosynthesis of amino acids);00010(Glycolysis / Gluconeogenesis);00710(Carbon fixation in photosynthetic organisms)	K00927	EC:2.7.2.3	K01512,ko00620,Pyruvate metabolism;K01512,ko00627,Aminobenzoate degradation	5.4622	0.962997	1.20106	1.10329	0.111895	0.357273
MD04G1094300	PREDICTED: LOW QUALITY PROTEIN: phosphoglycerate kinase-like [Malus domestica]	NA	NA	NA	-	6.83544	1.31577	0.776126	2.72022	0.150838	0.393082
MD04G1110400	PREDICTED: uncharacterized protein LOC103408360 [Malus domestica]	00480(Glutathione metabolism)	K00799	EC:2.5.1.18	-	10.559	1.49779	2.48058	3.61741	0.883773	0.719564
MD04G1111400	PREDICTED: glutathione S-transferase L3-like isoform X2 [Pyrus x bretschneideri]	04146(Peroxisome)	K13354	NA	K00799,ko00982,Drug metabolism - cytochrome P450;K00799,ko01524,Platinum drug resistance;K00799,ko05204,Chemical carcinogenesis;K00799,ko00980,Metabolism of xenobiotics by cytochrome P450;K00799,ko00480,Glutathione metabolism	3.03508	4.48765	5.35928	1.16752	0.84233	0.14408
MD04G1145100	PREDICTED: mitochondrial uncoupling protein 1 [Pyrus x bretschneideri]	01200(Carbon metabolism);01212(Fatty acid metabolism);00620(Pyruvate metabolism);00640(Propanoate metabolism);00061(Fatty acid biosynthesis);00253(Tetracycline biosynthesis)	K01962	EC:6.4.1.2	-	12.2953	2.39631	3.66943	2.79755	0.517101	1.01977
MD04G1146400	PREDICTED: acetyl-coenzyme A carboxylase carboxyl transferase subunit alpha, chloroplastic-like [Malus domestica]	NA	NA	NA	K01962,ko00061,Fatty acid biosynthesis;K01962,ko01200,Carbon metabolism;K01962,ko00253,Tetracycline biosynthesis;K01962,ko00640,Propanoate metabolism;K01962,ko00720,Carbon fixation pathways in prokaryotes;K01962,ko01212,Fatty acid metabolism;K01962,ko00620,Pyruvate metabolism	124.631	174.453	185.493	13.9015	12.0613	18.0519
MD04G1146900	PREDICTED: probable anion transporter 3, chloroplastic [Malus domestica]	00940(Phenylpropanoid biosynthesis);00945(Stilbenoid, diarylheptanoid and gingerol biosynthesis);00941(Flavonoid biosynthesis)	K13065	EC:2.3.1.133	-	39.8393	4.28335	3.00747	7.56383	0.0607527	0.036371
MD04G1147900	PREDICTED: BAHD acyltransferase DCR-like isoform X2 [Pyrus x bretschneideri]	00561(Glycerolipid metabolism)	K06119	EC:2.4.1.-	-	123.852	13.853	13.1753	2.0592	0.0913775	0.10941
MD04G1148000	PREDICTED: sulfoquinovosyl transferase SQD2-like [Pyrus x bretschneideri]	NA	NA	NA	K06119,ko00561,Glycerolipid metabolism	23.0584	21.4424	20.7911	4.59329	3.80216	5.93005
MD04G1152600	PREDICTED: GDSL esterase/lipase CPRD49-like [Malus domestica]	NA	NA	NA	-	20.7092	13.3593	11.8664	2.84998	3.81275	3.8136
MD04G1164700	PREDICTED: uncharacterized protein At5g01610-like [Malus domestica]	NA	NA	NA	-	20.9166	46.9364	40.6566	8.90165	19.1662	18.2833
MD04G1167500	PREDICTED: uncharacterized protein LOC103433716 [Malus domestica]	04075(Plant hormone signal transduction)	K14498	EC:2.7.11.1	-	19.8885	19.7209	12.4737	4.36265	6.57935	6.95589
MD04G1172200	CBL-interacting serine/threonine-protein kinase 14-like [Malus domestica]	04075(Plant hormone signal transduction)	K14510	EC:2.7.11.1	K12761,ko04113,Meiosis - yeast	22.5742	43.1054	46.0381	2.66883	7.63515	19.2451
MD04G1173100	PREDICTED: serine/threonine-protein kinase HT1 [Malus domestica]	01200(Carbon metabolism);00630(Glyoxylate and dicarboxylate metabolism);00910(Nitrogen metabolism);00460(Cyanoamino acid metabolism)	K01455	EC:3.5.1.49	-	38.4911	54.2577	50.6449	9.36279	10.1743	10.433
MD04G1173200	PREDICTED: pentatricopeptide repeat-containing protein At5g15300-like [Malus domestica]	NA	NA	NA	-	19.5703	12.5942	14.2917	2.93332	2.763	3.87772
MD04G1175900	PREDICTED: uncharacterized protein LOC103427644 isoform X1 [Malus domestica]	04626(Plant-pathogen interaction)	K16224	NA	-	5.73239	20.4316	17.69	1.98601	9.28224	9.72917
MD04G1183000	PREDICTED: probable leucine-rich repeat receptor-like protein kinase At5g49770 [Malus domestica]	04626(Plant-pathogen interaction)	K16224	NA	-	11.1685	13.4743	3.46207	2.97099	2.78569	2.66161
MD04G1183100	PREDICTED: LOW QUALITY PROTEIN: probable leucine-rich repeat receptor-like protein kinase At5g49770 [Malus domestica]	NA	NA	NA	-	20.5881	10.3896	10.3415	6.89061	3.42549	5.3927
MD04G1185900	PREDICTED: uncharacterized protein LOC103955308 [Pyrus x bretschneideri]	NA	NA	NA	-	14.5352	11.5753	9.441	3.78736	0.917417	1.74462
MD04G1186600	PREDICTED: aspartic proteinase-like [Malus domestica]	03010(Ribosome)	K02986	NA	-	3.58706	7.71686	6.90327	1.3847	0.556635	0.444323
MD04G1191300	PREDICTED: alkaline/neutral invertase A, mitochondrial-like [Malus domestica]	NA	NA	NA	-	36.9941	27.7064	26.5939	15.2317	10.2186	10.4306
MD04G1191700	PREDICTED: uncharacterized protein LOC103408523 [Malus domestica]	02010(ABC transporters)	K05681	NA	-	470.246	1779.53	2624.88	29.3677	133.678	168.58
MD04G1197400	PREDICTED: ABC transporter G family member 11-like [Malus domestica]	NA	NA	NA	-	1.94547	1.51812	2.364	0.681837	0.373886	0.417826
MD04G1197900	PREDICTED: uncharacterized protein LOC103433901 [Malus domestica]	03015(mRNA surveillance pathway)	K04382	EC:3.1.3.16	-	26.1535	49.7929	43.2567	4.73486	14.3121	12.5718
MD04G1198300	PREDICTED: serine/threonine-protein phosphatase PP1 isoform X1 [Malus domestica]	00591(Linoleic acid metabolism)	K15718	EC:1.13.11.58	K06269,ko04113,Meiosis - yeast;K06269,ko04024,cAMP signaling pathway;K06269,ko03015,mRNA surveillance pathway;K06269,ko04114,Oocyte meiosis;K06269,ko04390,Hippo signaling pathway;K06269,ko05031,Amphetamine addiction;K06269,ko04810,Regulation of actin cytoskeleton;K06269,ko04611,Platelet activation;K06269,ko04750,Inflammatory mediator regulation of TRP channels;K06269,ko04921,Oxytocin signaling pa…	19.0474	5.7989	6.45273	3.21941	0.938512	1.59194
MD04G1204000	lipoxygenase [Malus domestica]	00270(Cysteine and methionine metabolism);00480(Glutathione metabolism)	K01920	EC:6.3.2.3	-	10.3974	2.44267	4.16807	3.34554	0.566534	0.330472
MD04G1210100	PREDICTED: glutathione synthetase, chloroplastic-like [Malus domestica]	04075(Plant hormone signal transduction)	K14490	NA	-	38.9798	23.8437	21.9122	7.08234	6.73368	7.53435
MD04G1212100	PREDICTED: histidine-containing phosphotransfer protein 1 [Malus domestica]	03040(Spliceosome)	K12828	NA	K14490,ko04075,Plant hormone signal transduction	9.94366	10.2166	12.0718	3.12597	1.61412	2.40404
MD04G1216900	PREDICTED: acyltransferase-like protein At1g54570, chloroplastic [Pyrus x bretschneideri]	NA	NA	NA	-	10.7571	8.85548	8.67873	3.06669	2.30082	5.46226
MD04G1225400	pathogenesis-related protein 4 [Malus domestica]	NA	NA	NA	-	40.5871	1.5035	1.3644	1.925	0.340663	0.203945
MD04G1230400	PREDICTED: protein prenyltransferase alpha subunit repeat-containing protein 1 [Malus domestica]	00520(Amino sugar and nucleotide sugar metabolism)	K01183	EC:3.2.1.14	-	5.19126	2.66827	3.72096	1.13616	1.37733	1.31931
MD04G1233100	PREDICTED: U-box domain-containing protein 34-like [Malus domestica]	00520(Amino sugar and nucleotide sugar metabolism)	K01183	EC:3.2.1.14	-	10.1156	7.42306	7.66873	2.34184	1.03077	1.12382
MD04G1233200	PREDICTED: rust resistance kinase Lr10-like [Malus domestica]	00906(Carotenoid biosynthesis)	K15747	EC:1.14.-.-	-	16.8714	12.5326	14.5498	4.13656	4.80618	5.07074
MD04G1237400	PREDICTED: F-box protein PP2-B10-like [Malus domestica]	04626(Plant-pathogen interaction)	K13430	EC:2.7.11.1	-	11.4304	12.6095	9.82472	3.48818	2.69352	1.75651
MD04G1238700	PREDICTED: putative wall-associated receptor kinase-like 16 [Pyrus x bretschneideri]	04626(Plant-pathogen interaction)	K13430	EC:2.7.11.1	-	10.6844	8.07011	6.52526	3.73432	3.39421	3.65516
MD04G1238900	PREDICTED: putative wall-associated receptor kinase-like 16 [Pyrus x bretschneideri]	04626(Plant-pathogen interaction)	K13430	EC:2.7.11.1	-	4.36033	1.9091	2.40047	1.36027	0.386485	0.409361
MD04G1239000	PREDICTED: putative wall-associated receptor kinase-like 16 [Malus domestica]	00906(Carotenoid biosynthesis)	K15747	EC:1.14.-.-	-	7.66194	5.70867	4.01145	1.41916	1.00296	0.45551
MD04G1239800	PREDICTED: protein LUTEIN DEFICIENT 5, chloroplastic-like isoform X1 [Pyrus x bretschneideri]	00520(Amino sugar and nucleotide sugar metabolism)	K13379	EC:2.4.1.-;EC:5.4.99.30	-	61.0479	35.4202	34.2741	14.6183	10.3652	13.8436
MD04G1240800	PREDICTED: probable UDP-arabinopyranose mutase 5 [Malus domestica]	00520(Amino sugar and nucleotide sugar metabolism)	K13379	EC:2.4.1.-;EC:5.4.99.30	K13379,ko00520,Amino sugar and nucleotide sugar metabolism	34.7469	33.3542	33.4738	10.2663	8.04165	10.5496
MD04G1240900	PREDICTED: uncharacterized protein LOC103938536 [Pyrus x bretschneideri]	00920(Sulfur metabolism);02010(ABC transporters)	K02045	EC:3.6.3.25	-	33.8671	4.49905	5.9201	10.2474	1.57157	2.54286
MD04G1243700	PREDICTED: protein TRIGALACTOSYLDIACYLGLYCEROL 3, chloroplastic-like isoform X3 [Malus domestica]	NA	NA	NA	-	13.5495	7.66228	7.49404	3.55734	1.69792	2.15159
MD04G1244500	PREDICTED: probable tyrosine-protein phosphatase At1g05000 [Malus domestica]	NA	NA	NA	-	20.1688	4.3246	4.47719	7.08194	0.579804	0.879353
MD04G1246200	PREDICTED: thioredoxin F-type, chloroplastic-like isoform X2 [Pyrus x bretschneideri]	01200(Carbon metabolism);00630(Glyoxylate and dicarboxylate metabolism)	K19269	EC:3.1.3.18;EC:3.1.3.48	-	29.8989	18.9489	15.4126	4.3295	1.82869	2.53863
MD04G1248400	PREDICTED: phosphoglycolate phosphatase 1B, chloroplastic-like [Pyrus x bretschneideri]	01230(Biosynthesis of amino acids);00260(Glycine, serine and threonine metabolism);00270(Cysteine and methionine metabolism);00300(Lysine biosynthesis);00261(Monobactam biosynthesis)	K12524	EC:2.7.2.4;EC:1.1.1.3	-	12.0649	15.472	11.0346	3.66983	3.92684	4.73969
MD05G1003800	PREDICTED: bifunctional aspartokinase/homoserine dehydrogenase 1, chloroplastic-like isoform X1 [Malus domestica]	NA	NA	NA	-	71.1113	47.4318	45.6135	11.9144	13.3518	20.3858
MD05G1017400	PREDICTED: pathogen-related protein-like [Malus domestica]	00360(Phenylalanine metabolism);00130(Ubiquinone and other terpenoid-quinone biosynthesis);00940(Phenylpropanoid biosynthesis)	K01904	EC:6.2.1.12	-	96.3224	32.573	26.6396	2.20309	1.61396	1.38033
MD05G1027100	PREDICTED: probable acyl-activating enzyme 1, peroxisomal [Malus domestica]	00670(One carbon pool by folate)	K01934	EC:6.3.3.2	-	137.019	82.9813	81.8966	47.2052	26.4303	32.3305
MD05G1030000	PREDICTED: 5-formyltetrahydrofolate cyclo-ligase-like protein COG0212 [Malus domestica]	04075(Plant hormone signal transduction)	K14517	NA	-	14.2638	12.5407	10.1839	4.81886	5.11261	5.82078
MD05G1030800	PREDICTED: ethylene-responsive transcription factor ABR1-like [Malus domestica]	NA	NA	NA	-	11.4729	5.94806	4.76852	4.84947	0.360352	0.186968
MD05G1039700	PREDICTED: LOW QUALITY PROTEIN: protein-tyrosine-phosphatase PTP1 [Malus domestica]	01200(Carbon metabolism);00010(Glycolysis / Gluconeogenesis);00020(Citrate cycle (TCA cycle));00620(Pyruvate metabolism)	K00627	EC:2.3.1.12	-	10.9407	3.39656	3.00685	2.15586	0.811477	0.908933
MD05G1040900	PREDICTED: dihydrolipoyllysine-residue acetyltransferase component 5 of pyruvate dehydrogenase complex, chloroplastic [Malus domestica]	02010(ABC transporters)	K05681	NA	K00627,ko00010,Glycolysis / Gluconeogenesis;K00627,ko00020,Citrate cycle (TCA cycle);K00627,ko01200,Carbon metabolism;K00627,ko00620,Pyruvate metabolism	25.4941	22.5288	23.8731	6.1681	4.71355	7.13693
MD05G1042600	PREDICTED: ABC transporter G family member 11-like [Malus domestica]	01230(Biosynthesis of amino acids);00400(Phenylalanine, tyrosine and tryptophan biosynthesis)	K01626	EC:2.5.1.54	-	1.70378	2.63798	3.73732	0.433433	0	0.0115805
MD05G1042700	PREDICTED: phospho-2-dehydro-3-deoxyheptonate aldolase 2, chloroplastic-like isoform X1 [Malus domestica]	NA	NA	NA	K01626,ko00400,Phenylalanine, tyrosine and tryptophan biosynthesis;K01626,ko01230,Biosynthesis of amino acids;K01626,ko02024,Quorum sensing	106.23	93.5247	82.8543	37.9864	23.5771	34.203
MD05G1045600	PREDICTED: dicarboxylate transporter 2, chloroplastic-like, partial [Pyrus x bretschneideri]	00910(Nitrogen metabolism)	K01673	EC:4.2.1.1	-	77.937	40.6415	44.5833	11.3548	6.72858	10.1516
MD05G1047300	PREDICTED: beta carbonic anhydrase 5, chloroplastic isoform X2 [Malus domestica]	NA	NA	NA	-	43.8968	38.1818	39.7308	2.30934	0.957261	0.961966
MD05G1048500	PREDICTED: costars family protein-like [Pyrus x bretschneideri]	00190(Oxidative phosphorylation)	K01507	EC:3.6.1.1	-	9.62431	12.7528	14.1899	2.14794	1.91974	5.54832
MD05G1051000	PREDICTED: soluble inorganic pyrophosphatase 6, chloroplastic [Malus domestica]	00040(Pentose and glucuronate interconversions);00051(Fructose and mannose metabolism);00052(Galactose metabolism);00561(Glycerolipid metabolism)	K00011	EC:1.1.1.21	K01507,ko00190,Oxidative phosphorylation	13.0684	5.85124	6.13591	5.16321	2.84095	2.58269
MD05G1054800	PREDICTED: NADP-dependent D-sorbitol-6-phosphate dehydrogenase-like [Pyrus x bretschneideri]	01230(Biosynthesis of amino acids);00053(Ascorbate and aldarate metabolism);00562(Inositol phosphate metabolism);00340(Histidine metabolism);04070(Phosphatidylinositol signaling system)	K18649	EC:3.1.3.25;EC:3.1.3.93	-	17.9396	9.08197	4.70958	0.928105	0.24943	0.0853296
MD05G1061200	PREDICTED: bifunctional phosphatase IMPL2, chloroplastic-like isoform X2 [Malus domestica]	00562(Inositol phosphate metabolism);04070(Phosphatidylinositol signaling system)	K00888	EC:2.7.1.67	-	12.0922	6.8748	7.20134	4.27437	2.99671	3.80125
MD05G1068200	PREDICTED: phosphatidylinositol 4-kinase alpha 1 [Malus domestica]	NA	NA	NA	K00888,ko04011,MAPK signaling pathway - yeast;K00888,ko00562,Inositol phosphate metabolism;K00888,ko04070,Phosphatidylinositol signaling system	11.7478	5.63389	6.1142	4.21257	1.7054	2.62192
MD05G1069700	PREDICTED: putative polyol transporter 1 [Malus domestica]	00900(Terpenoid backbone biosynthesis)	K03527	EC:1.17.7.4	-	9.80602	0.73474	0.579797	0.823408	0.0965088	0
MD05G1071900	PREDICTED: 4-hydroxy-3-methylbut-2-enyl diphosphate reductase, chloroplastic [Malus domestica]	00600(Sphingolipid metabolism)	K04710	EC:2.3.1.24	K03527,ko00900,Terpenoid backbone biosynthesis	86.6434	196.105	192.422	9.67656	11.3394	14.9736
MD05G1081300	PREDICTED: LAG1 longevity assurance homolog 2 [Malus domestica]	04075(Plant hormone signal transduction)	K14432	NA	K04710,ko00600,Sphingolipid metabolism;K04710,ko04071,Sphingolipid signaling pathway	13.5227	2.89714	2.59528	4.57681	0.639799	1.34827
MD05G1082000	PREDICTED: ABSCISIC ACID-INSENSITIVE 5-like protein 5 [Malus domestica]	04141(Protein processing in endoplasmic reticulum)	K09580	EC:5.3.4.1	-	21.4699	67.3326	64.7639	7.02563	29.6889	35.0234
MD05G1082500	PREDICTED: thioredoxin M3, chloroplastic [Malus domestica]	00360(Phenylalanine metabolism);00940(Phenylpropanoid biosynthesis);00945(Stilbenoid, diarylheptanoid and gingerol biosynthesis);00941(Flavonoid biosynthesis)	K00588	EC:2.1.1.104	-	16.7249	6.12661	7.52126	4.27892	0.675219	1.85472
MD05G1083900	PREDICTED: caffeoyl-CoA O-methyltransferase [Malus domestica]	NA	NA	NA	-	36.1079	100.165	29.7237	14.4146	6.91477	4.94576
MD05G1085200	PREDICTED: CBS domain-containing protein CBSX2, chloroplastic-like [Pyrus x bretschneideri]	NA	NA	NA	-	47.4985	18.057	17.899	14.6067	6.72057	9.77397
MD05G1087700	PREDICTED: probably inactive leucine-rich repeat receptor-like protein kinase At3g28040 [Malus domestica]	NA	NA	NA	-	13.9317	6.73164	5.64425	4.19676	1.53958	1.7148
MD05G1094800	PREDICTED: uncharacterized protein LOC103414477 isoform X1 [Malus domestica]	04144(Endocytosis)	K12472	NA	-	4.58329	1.34767	1.58988	1.66298	0.585263	0.639826
MD05G1094900	PREDICTED: uncharacterized protein LOC103436386 [Malus domestica]	04075(Plant hormone signal transduction);04626(Plant-pathogen interaction)	K13416	EC:2.7.10.1;EC:2.7.11.1	-	5.49955	9.89002	10.1191	2.15843	3.91585	4.30326
MD05G1096400	PREDICTED: somatic embryogenesis receptor kinase 2-like [Malus domestica]	03015(mRNA surveillance pathway)	K11584	NA	-	668.08	153.957	166.558	199.526	21.0905	31.1586
MD05G1096900	PREDICTED: probable polyamine transporter At3g19553 [Malus domestica]	NA	NA	NA	-	22.196	7.71325	6.91436	9.18811	1.00225	1.17504
MD05G1102600	PREDICTED: uncharacterized protein LOC103935153 [Pyrus x bretschneideri]	01200(Carbon metabolism);01230(Biosynthesis of amino acids);00010(Glycolysis / Gluconeogenesis);00620(Pyruvate metabolism);00230(Purine metabolism)	K00873	EC:2.7.1.40	-	2.15456	1.7864	2.04995	0.867598	0.43523	0.312672
MD05G1107300	PREDICTED: pyruvate kinase isozyme A, chloroplastic-like [Malus domestica]	01230(Biosynthesis of amino acids);00300(Lysine biosynthesis)	K10206	EC:2.6.1.83	K00873,ko04922,Glucagon signaling pathway;K00873,ko01200,Carbon metabolism;K00873,ko04930,Type II diabetes mellitus;K00873,ko01230,Biosynthesis of amino acids;K00873,ko05230,Central carbon metabolism in cancer;K00873,ko00620,Pyruvate metabolism;K00873,ko05203,Viral carcinogenesis;K00873,ko00230,Purine metabolism;K00873,ko00010,Glycolysis / Gluconeogenesis	37.9076	23.9694	28.2896	11.9982	8.6517	10.4031
MD05G1111000	PREDICTED: LL-diaminopimelate aminotransferase, chloroplastic-like [Malus domestica]	NA	NA	NA	K10206,ko00300,Lysine biosynthesis;K10206,ko01230,Biosynthesis of amino acids	35.2947	11.1849	11.6909	6.17919	2.8423	5.22354
MD05G1115400	PREDICTED: uncharacterized protein LOC103436232 [Malus domestica]	NA	NA	NA	-	102.984	6.21965	5.78191	27.5603	2.29147	2.19494
MD05G1120700	hypothetical protein PRUPE_ppa015070mg [Prunus persica]	00053(Ascorbate and aldarate metabolism);00480(Glutathione metabolism)	K00434	EC:1.11.1.11	-	15.1854	9.26379	9.20528	3.94714	2.62116	4.17634
MD05G1120800	PREDICTED: L-ascorbate peroxidase 3, peroxisomal-like [Malus domestica]	NA	NA	NA	-	48.438	21.8545	22.2276	12.7772	3.23862	5.93839
MD05G1121700	PREDICTED: WD-40 repeat-containing protein MSI3 [Malus domestica]	NA	NA	NA	-	31.3332	25.2104	22.3596	11.0292	7.34509	7.29825
MD05G1122000	PREDICTED: probable BOI-related E3 ubiquitin-protein ligase 2 [Malus domestica]	NA	NA	NA	-	10.9117	26.3168	38.2277	3.53666	1.68872	2.46682
MD05G1123300	hypothetical protein PRUPE_ppa012181mg [Prunus persica]	NA	NA	NA	-	12.5664	5.48549	4.15343	4.96266	1.67754	2.37379
MD05G1126300	PREDICTED: hippocampus abundant transcript 1 protein-like isoform X1 [Malus domestica]	NA	NA	NA	-	34.0831	13.4658	16.9645	12.4705	5.18461	5.43705
MD05G1126400	PREDICTED: uncharacterized protein LOC103412108 [Malus domestica]	00900(Terpenoid backbone biosynthesis)	K13789	EC:2.5.1.1;EC:2.5.1.10	-	43.5129	12.8366	10.0343	14.9253	3.93561	4.97089
MD05G1127100	PREDICTED: heterodimeric geranylgeranyl pyrophosphate synthase small subunit, chloroplastic [Malus domestica]	03040(Spliceosome);04141(Protein processing in endoplasmic reticulum);04144(Endocytosis)	K03283	NA	K13789,ko00900,Terpenoid backbone biosynthesis	124.366	232.646	235.377	40.927	65.4242	95.5539
MD05G1137400	PREDICTED: disease resistance protein RPP4-like [Pyrus x bretschneideri]	03040(Spliceosome);04141(Protein processing in endoplasmic reticulum);04144(Endocytosis)	K03283	NA	-	13.0424	19.3451	20.7473	4.29533	4.05286	8.29847
MD05G1151200	PREDICTED: TMV resistance protein N-like [Pyrus x bretschneideri]	04626(Plant-pathogen interaction)	K18875	NA	-	4.37987	3.66564	3.27361	0.324595	0.470318	0.303533
MD05G1152500	PREDICTED: formin-like protein 1 [Malus domestica]	NA	NA	NA	-	0.910688	0.366163	0.282798	0.335421	0.0470725	0.0986336
MD05G1152600	PREDICTED: acyl-coenzyme A thioesterase 9, mitochondrial-like [Malus domestica]	NA	NA	NA	-	14.1284	11.2614	8.75797	2.51113	2.19299	4.09096
MD05G1158500	PREDICTED: probable sodium/metabolite cotransporter BASS3, chloroplastic [Malus domestica]	00240(Pyrimidine metabolism)	K16904	EC:3.6.1.12	-	40.2816	11.7789	11.6536	2.8578	1.9293	2.01059
MD05G1163300	PREDICTED: dCTP pyrophosphatase 1-like [Malus domestica]	04626(Plant-pathogen interaction)	K13412	EC:2.7.11.1	K16904,ko00240,Pyrimidine metabolism	80.5617	50.3243	78.2203	26.7131	10.9438	7.99263
MD05G1164900	PREDICTED: serine/threonine-protein kinase OXI1 [Malus domestica]	00904(Diterpenoid biosynthesis)	K17961	EC:1.14.-.-	-	6.60624	15.0975	15.4458	1.21984	0.216311	0.702996
MD05G1169600	PREDICTED: cytochrome P450 82G1-like [Malus domestica]	NA	NA	NA	K17961,ko00904,Diterpenoid biosynthesis	10.2748	38.2654	12.4978	0.607648	0.0231761	0
MD05G1171500	PREDICTED: uncharacterized protein LOC103927679 [Pyrus x bretschneideri]	00480(Glutathione metabolism)	K00799	EC:2.5.1.18	-	7.59007	4.17131	3.46755	1.55812	0.865775	1.15181
MD05G1184600	PREDICTED: probable glutathione S-transferase [Malus domestica]	00480(Glutathione metabolism)	K00799	EC:2.5.1.18	-	29.5804	21.7378	15.2933	8.04523	3.38512	6.68771
MD05G1184700	PREDICTED: glutaredoxin-C5, chloroplastic [Pyrus x bretschneideri]	NA	NA	NA	-	19.291	9.01525	8.22504	4.82242	1.48945	2.42031
MD05G1192900	PREDICTED: uncharacterized protein LOC103419929 [Malus domestica]	01200(Carbon metabolism);00020(Citrate cycle (TCA cycle));00640(Propanoate metabolism)	K01900	EC:6.2.1.4;EC:6.2.1.5	-	12.2669	7.2393	9.42392	2.18616	0.51848	0.338618
MD05G1193100	PREDICTED: succinyl-CoA ligase [ADP-forming] subunit beta, mitochondrial [Malus domestica]	NA	NA	NA	K01900,ko00020,Citrate cycle (TCA cycle);K01900,ko00640,Propanoate metabolism;K01900,ko01200,Carbon metabolism	51.397	29.3696	34.5762	21.8832	12.1634	15.808
MD05G1193600	PREDICTED: glycolipid transfer protein 1-like [Malus domestica]	04144(Endocytosis)	K12192	NA	-	37.4957	33.4535	38.1124	12.7928	10.5476	14.1791
MD05G1193900	PREDICTED: vacuolar protein sorting-associated protein 2 homolog 3-like [Malus domestica]	03010(Ribosome)	K02864	NA	-	32.5039	42.6903	41.882	10.0738	16.0564	19.1585
MD05G1196100	PREDICTED: 50S ribosomal protein L10, chloroplastic [Malus domestica]	NA	NA	NA	K02864,ko03010,Ribosome	7.63884	10.1853	9.7943	3.08068	4.10773	4.35627
MD05G1199200	PREDICTED: uncharacterized protein LOC103946083 [Pyrus x bretschneideri]	NA	NA	NA	-	5.09335	3.07765	3.25389	1.27449	0.361079	1.05382
MD05G1203900	PREDICTED: uncharacterized protein LOC103435696 [Malus domestica]	00480(Glutathione metabolism)	K00383	EC:1.8.1.7	-	8.07981	16.0926	14.7716	1.29625	0.999416	1.51833
MD05G1205200	PREDICTED: glutathione reductase, chloroplastic-like [Pyrus x bretschneideri]	NA	NA	NA	K00383,ko00480,Glutathione metabolism;K00383,ko04918,Thyroid hormone synthesis	46.3208	20.4298	18.6211	11.5169	6.172	6.83323
MD05G1205700	PREDICTED: putative uridine kinase C227.14 isoform X1 [Malus domestica]	00360(Phenylalanine metabolism);00940(Phenylpropanoid biosynthesis);00945(Stilbenoid, diarylheptanoid and gingerol biosynthesis);00941(Flavonoid biosynthesis)	K00588	EC:2.1.1.104	-	13.7595	5.25576	5.07288	5.8433	1.77943	2.3127
MD05G1207300	PREDICTED: 9-cis-epoxycarotenoid dioxygenase NCED1, chloroplastic-like [Malus domestica]	NA	NA	NA	-	9.83651	1.29869	0.989394	0.125612	0	0
MD05G1209400	PREDICTED: tricin synthase 1-like [Pyrus x bretschneideri]	00520(Amino sugar and nucleotide sugar metabolism)	K01183	EC:3.2.1.14	-	3.45935	0.955398	1.64895	0.601601	0.626278	0.489046
MD05G1213800	PREDICTED: heat stress transcription factor A-1-like [Pyrus x bretschneideri]	NA	NA	NA	-	6.5248	4.12593	3.79979	2.50388	0.935955	1.35798
MD05G1216300	PREDICTED: G-type lectin S-receptor-like serine/threonine-protein kinase At4g27290 [Malus domestica]	00520(Amino sugar and nucleotide sugar metabolism)	K01183	EC:3.2.1.14	-	33.6512	14.7804	14.8075	12.0755	6.05155	6.70631
MD05G1223700	PREDICTED: putative protein TPRXL [Malus domestica]	03015(mRNA surveillance pathway)	K04382	EC:3.1.3.16	-	17.7584	5.47802	7.50947	2.96901	0.851811	0.524526
MD05G1226700	PREDICTED: receptor-like serine/threonine-protein kinase SD1-7 isoform X2 [Malus domestica]	NA	NA	NA	-	4.70918	0.820418	1.35062	1.76285	0.165818	0.250789
MD05G1233000	PREDICTED: G-type lectin S-receptor-like serine/threonine-protein kinase At4g27290 isoform X1 [Malus domestica]	03030(DNA replication);03420(Nucleotide excision repair);03430(Mismatch repair);03440(Homologous recombination)	K07466	NA	-	3.29614	1.77737	1.26017	0.782485	0.518116	0.733157
MD05G1241400	PREDICTED: uncharacterized protein LOC103435339 [Malus domestica]	NA	NA	NA	-	27.2129	12.1461	12.677	6.25663	4.49646	5.76837
MD05G1244300	PREDICTED: peptidyl-prolyl cis-trans isomerase FKBP13, chloroplastic [Pyrus x bretschneideri]	03050(Proteasome)	K02726	EC:3.4.25.1	-	14.8624	9.41579	8.6966	4.75209	3.02236	3.68977
MD05G1249800	PREDICTED: potassium transporter 11-like isoform X1 [Malus domestica]	NA	NA	NA	-	35.6724	10.5563	9.46386	11.1957	1.7901	2.80286
MD05G1251300	PREDICTED: proteasome subunit alpha type-2-B [Malus domestica]	04075(Plant hormone signal transduction);04626(Plant-pathogen interaction)	K13416	EC:2.7.10.1;EC:2.7.11.1	K02726,ko03050,Proteasome	17.7764	12.4515	12.5928	5.65495	4.69305	5.90124
MD05G1255400	PREDICTED: BOI-related E3 ubiquitin-protein ligase 1-like [Pyrus x bretschneideri]	00230(Purine metabolism)	K01514	EC:3.6.1.11	-	33.1537	28.3028	27.3487	4.76561	7.75803	10.3455
MD05G1260700	PREDICTED: probable LRR receptor-like serine/threonine-protein kinase At1g56140 [Pyrus x bretschneideri]	00520(Amino sugar and nucleotide sugar metabolism)	K12448	EC:5.1.3.5	-	53.4989	31.4931	26.8774	14.2876	13.7433	6.43266
MD05G1261900	PREDICTED: protein prune homolog isoform X1 [Malus domestica]	04140(Regulation of autophagy)	K08337	NA	-	8.77172	3.8941	4.39206	2.6514	0.829808	0.905529
MD05G1263800	PREDICTED: UDP-arabinose 4-epimerase 1-like [Pyrus x bretschneideri]	00195(Photosynthesis)	K02641	EC:1.18.1.2	K12448,ko00520,Amino sugar and nucleotide sugar metabolism	30.8457	3.84267	4.51621	3.16287	0.35046	0.891695
MD05G1272100	PREDICTED: uncharacterized protein LOC108172753 [Malus domestica]	NA	NA	NA	-	6.1772	24.1264	21.0844	2.22985	8.05615	7.63715
MD05G1273100	PREDICTED: ferredoxin--NADP reductase, root isozyme, chloroplastic [Malus domestica]	NA	NA	NA	K02641,ko00195,Photosynthesis	2.80049	1.72618	2.55914	1.10852	0.576385	0.6737
MD05G1274400	PREDICTED: accelerated cell death 11-like [Malus domestica]	04075(Plant hormone signal transduction)	K14498	EC:2.7.11.1	-	4.03581	3.82465	3.2322	1.23518	0.767294	1.29701
MD05G1274700	PREDICTED: cationic amino acid transporter 1-like [Malus domestica]	NA	NA	NA	-	269.887	138.651	134.788	22.2819	9.29099	15.0129
MD05G1280400	CBL-interacting protein kinase 23-like [Malus domestica]	NA	NA	NA	-	4.86904	10.0475	8.78815	1.71064	2.90625	4.18057
MD05G1281100	uncharacterized protein LOC103435166 [Malus domestica]	01200(Carbon metabolism);00010(Glycolysis / Gluconeogenesis);00020(Citrate cycle (TCA cycle));00620(Pyruvate metabolism)	K00162	EC:1.2.4.1	-	155.459	108.242	72.2479	30.1739	19.6876	25.3252
MD05G1281600	PREDICTED: protease Do-like 5, chloroplastic [Prunus mume]	NA	NA	NA	-	10.1684	3.19867	3.51116	4.07022	1.27557	1.22647
MD05G1282600	PREDICTED: pyruvate dehydrogenase E1 component subunit beta-3, chloroplastic-like [Malus domestica]	NA	NA	NA	K00162,ko04066,HIF-1 signaling pathway;K00162,ko00020,Citrate cycle (TCA cycle);K00162,ko05230,Central carbon metabolism in cancer;K00162,ko01200,Carbon metabolism;K00162,ko00010,Glycolysis / Gluconeogenesis;K00162,ko04922,Glucagon signaling pathway;K00162,ko00620,Pyruvate metabolism	450.577	267.966	335.106	50.6077	43.8186	53.3537
MD05G1282700	PREDICTED: probable 9-cis-epoxycarotenoid dioxygenase NCED5, chloroplastic [Malus domestica]	NA	NA	NA	-	45.8063	14.7582	18.909	21.0367	2.33952	4.22382
MD05G1284000	PREDICTED: uncharacterized protein LOC103434996 isoform X2 [Malus domestica]	04075(Plant hormone signal transduction)	K13415	EC:2.7.10.1;EC:2.7.11.1	-	12.8455	15.4401	18.6233	2.94797	1.03003	2.29041
MD05G1290800	PREDICTED: coatomer subunit zeta-2-like [Malus domestica]	04120(Ubiquitin mediated proteolysis)	K10606	EC:2.3.2.27	-	13.4046	6.47674	6.19404	3.23696	2.77509	3.37905
MD05G1295400	PREDICTED: uncharacterized protein LOC103434908 [Malus domestica]	00860(Porphyrin and chlorophyll metabolism)	K03405	EC:6.6.1.1	-	28.1255	7.27185	6.20656	1.27931	1.80072	2.37169
MD05G1298700	PREDICTED: probable LRR receptor-like serine/threonine-protein kinase At2g24230 [Pyrus x bretschneideri]	NA	NA	NA	-	6.58036	3.41525	3.20419	1.18047	0.0992087	0.403876
MD05G1301500	PREDICTED: uncharacterized protein LOC103940720 [Pyrus x bretschneideri]	04075(Plant hormone signal transduction)	K14486	NA	-	22.2308	15.3943	13.3098	4.13921	2.08779	2.37051
MD05G1304900	PREDICTED: magnesium-chelatase subunit ChlI, chloroplastic-like [Malus domestica]	00230(Purine metabolism)	K01466	EC:3.5.2.5	K03405,ko00860,Porphyrin and chlorophyll metabolism	24.2046	31.1066	29.5135	4.75697	9.5917	18.025
MD05G1308400	PREDICTED: OPA3-like protein [Malus domestica]	00350(Tyrosine metabolism);00950(Isoquinoline alkaloid biosynthesis)	K00422	EC:1.10.3.1	-	4.05746	6.20164	5.71755	1.24176	1.03626	1.91077
MD05G1309400	PREDICTED: auxin response factor 3-like [Malus domestica]	04626(Plant-pathogen interaction)	K13430	EC:2.7.11.1	K14486,ko04075,Plant hormone signal transduction	15.6141	12.2721	13.5194	2.4398	2.3135	2.9899
MD05G1314100	PREDICTED: allantoinase-like [Malus domestica]	NA	NA	NA	K01466,ko00230,Purine metabolism	10.8377	7.37591	7.04582	0.551676	0.293199	0.477443
MD05G1318900	PREDICTED: polyphenol oxidase, chloroplastic-like [Malus domestica]	00620(Pyruvate metabolism)	K01759	EC:4.4.1.5	-	9.37646	26.2795	13.355	3.79965	5.16559	3.62568
MD05G1322700	PREDICTED: protein STRUBBELIG-RECEPTOR FAMILY 3 [Malus domestica]	03010(Ribosome)	K02987	NA	-	4.14929	0.942079	0.927117	0.671236	0.221362	0.473299
MD05G1323600	PREDICTED: endonuclease 1 [Pyrus x bretschneideri]	00051(Fructose and mannose metabolism)	K00895	EC:2.7.1.90	-	5.25339	1.32144	1.3842	2.14749	0.598823	0.563355
MD05G1348100	PREDICTED: putative lactoylglutathione lyase [Pyrus x bretschneideri]	04146(Peroxisome)	K11147	EC:1.1.-.-	K01759,ko00620,Pyruvate metabolism	685.901	442.838	425.828	264.747	114.808	151.239
MD05G1351300	PREDICTED: lysine-specific demethylase JMJ25 isoform X2 [Malus domestica]	00564(Glycerophospholipid metabolism)	K06130	EC:3.1.1.5	-	1.07617	1.47688	1.33232	0.419606	0.488417	0.790276
MD05G1354600	PREDICTED: pyrophosphate--fructose 6-phosphate 1-phosphotransferase subunit beta-like [Malus domestica]	NA	NA	NA	-	14.2235	15.8821	15.3554	3.82488	4.94589	5.00302
MD05G1355800	PREDICTED: tropinone reductase-like 3 [Malus domestica]	01200(Carbon metabolism);01230(Biosynthesis of amino acids);00010(Glycolysis / Gluconeogenesis);00030(Pentose phosphate pathway);00051(Fructose and mannose metabolism);00052(Galactose metabolism);03018(RNA degradation)	K00850	EC:2.7.1.11	K11147,ko04146,Peroxisome;K11147,ko00830,Retinol metabolism	32.4219	38.7595	35.638	12.0815	5.4828	7.11428
MD05G1356600	PREDICTED: probable carboxylesterase SOBER1-like [Malus domestica]	03013(RNA transport)	K14317	NA	-	30.1258	3.13294	4.43358	11.2839	1.74894	1.92984
MD05G1358600	PREDICTED: tonoplast dicarboxylate transporter [Malus domestica]	NA	NA	NA	-	17.2948	15.5552	11.2222	4.04098	1.84782	3.16786
MD05G1363600	PREDICTED: ATP-dependent 6-phosphofructokinase 2 [Pyrus x bretschneideri]	01200(Carbon metabolism);01230(Biosynthesis of amino acids);00030(Pentose phosphate pathway);00710(Carbon fixation in photosynthetic organisms)	K01807	EC:5.3.1.6	-	9.49635	8.95163	8.28017	2.58227	2.03627	3.69827
MD05G1364400	PREDICTED: myb family transcription factor APL-like isoform X1 [Malus domestica]	NA	NA	NA	-	16.9845	9.67761	7.96347	6.76177	3.83498	4.33581
MD06G1001300	PREDICTED: uncharacterized protein LOC103409390 [Malus domestica]	NA	NA	NA	-	64.2285	89.4038	74.096	22.1414	28.9242	29.2912
MD06G1002600	PREDICTED: protein PIN-LIKES 3-like [Pyrus x bretschneideri]	NA	NA	NA	-	36.2005	3.79291	5.77766	14.8611	1.58579	1.11781
MD06G1005100	PREDICTED: monosaccharide-sensing protein 2-like [Malus domestica]	01200(Carbon metabolism);00630(Glyoxylate and dicarboxylate metabolism);00380(Tryptophan metabolism);04146(Peroxisome)	K03781	EC:1.11.1.6	-	61.6801	55.3859	59.6612	24.8752	15.8045	23.3648
MD06G1006300	PREDICTED: uncharacterized protein LOC103961744 isoform X1 [Pyrus x bretschneideri]	NA	NA	NA	-	55.346	45.2292	55.3586	18.099	8.89972	9.89313
MD06G1006600	PREDICTED: protein canopy-1 [Malus domestica]	00600(Sphingolipid metabolism)	K00654	EC:2.3.1.50	-	21.6679	41.8144	47.2101	2.85155	8.80704	19.2464
MD06G1008700	catalase [Eriobotrya japonica]	00592(alpha-Linolenic acid metabolism)	K18858	EC:2.3.1.195	-	1331.04	484.989	491.683	462.83	121.761	140.045
MD06G1011400	PREDICTED: CASP-like protein 2A1 [Pyrus x bretschneideri]	NA	NA	NA	-	36.4124	20.2135	25.4762	1.8214	0.567531	0.90604
MD06G1012900	PREDICTED: pectin acetylesterase 8 isoform X1 [Malus domestica]	04075(Plant hormone signal transduction)	K14504	EC:2.4.1.207	K19882,ko04310,Wnt signaling pathway	60.04	22.6275	20.4129	14.7057	5.50433	4.38892
MD06G1016500	PREDICTED: benzyl alcohol O-benzoyltransferase-like [Malus domestica]	00520(Amino sugar and nucleotide sugar metabolism)	K00621	EC:2.3.1.4	-	142.525	115.653	131.632	5.63285	1.57538	2.72809
MD06G1025700	PREDICTED: plastoglobulin-1, chloroplastic [Malus domestica]	00740(Riboflavin metabolism)	K00861	EC:2.7.1.26	-	136.663	38.6077	37.2057	47.0462	11.2549	17.0964
MD06G1027300	PREDICTED: probable xyloglucan endotransglucosylase/hydrolase protein 30 [Malus domestica]	00906(Carotenoid biosynthesis)	K09838	EC:1.14.13.90	-	110.625	32.9357	24.0533	28.9053	15.4229	9.98722
MD06G1040400	PREDICTED: glucosamine 6-phosphate N-acetyltransferase-like [Malus domestica]	NA	NA	NA	-	6.09861	11.142	7.60478	2.3389	3.85203	5.17987
MD06G1041200	PREDICTED: haloacid dehalogenase-like hydrolase domain-containing protein Sgpp [Malus domestica]	01200(Carbon metabolism);01230(Biosynthesis of amino acids);00030(Pentose phosphate pathway)	K00616	EC:2.2.1.2	-	31.4708	8.99106	10.6133	6.73269	1.83158	2.8137
MD06G1049200	PREDICTED: 2-heptyl-3-hydroxy-4(1H)-quinolone synthase isoform X1 [Malus domestica]	00520(Amino sugar and nucleotide sugar metabolism);00523(Polyketide sugar unit biosynthesis)	K12451	EC:5.1.3.-;EC:1.1.1.-	-	7.40143	3.36727	2.73375	3.11414	0.957115	0.916797
MD06G1063900	PREDICTED: ATP-dependent Clp protease proteolytic subunit-related protein 2, chloroplastic-like [Malus domestica]	NA	NA	NA	-	39.5198	13.1732	11.5412	13.5406	5.14343	7.15922
MD06G1067000	PREDICTED: uncharacterized protein LOC103935816 [Pyrus x bretschneideri]	NA	NA	NA	K00616,ko01200,Carbon metabolism;K00616,ko01230,Biosynthesis of amino acids;K00616,ko00030,Pentose phosphate pathway	112.478	28.5077	34.1851	25.9814	3.43596	4.65232
MD06G1070600	PREDICTED: bifunctional dTDP-4-dehydrorhamnose 3,5-epimerase/dTDP-4-dehydrorhamnose reductase-like [Malus domestica]	03022(Basal transcription factors);03420(Nucleotide excision repair)	K10843	EC:3.6.4.12	K12451,ko00523,Polyketide sugar unit biosynthesis;K12451,ko00520,Amino sugar and nucleotide sugar metabolism	39.0147	8.30279	11.9494	6.24492	0.787792	1.62241
MD06G1077800	PREDICTED: tetraspanin-10 [Pyrus x bretschneideri]	00900(Terpenoid backbone biosynthesis)	K01770	EC:4.6.1.12	-	4.22222	6.725	8.12309	1.53703	2.3316	4.44318
MD06G1077900	PREDICTED: uncharacterized protein LOC103437355 isoform X2 [Malus domestica]	NA	NA	NA	-	29.6417	36.2422	33.5276	12.0524	14.7409	15.4799
MD06G1087900	PREDICTED: DNA repair helicase XPB1 [Pyrus x bretschneideri]	NA	NA	NA	-	25.974	15.3782	15.8971	8.74387	4.36974	5.79526
MD06G1090700	PREDICTED: 2-C-methyl-D-erythritol 2,4-cyclodiphosphate synthase, chloroplastic-like [Malus domestica]	04626(Plant-pathogen interaction)	K13447	EC:1.6.3.-;EC:1.11.1.-	K01770,ko00900,Terpenoid backbone biosynthesis	29.1893	29.4535	25.5574	11.7523	12.329	13.0288
MD06G1091000	PREDICTED: PIN2/TERF1-interacting telomerase inhibitor 1 [Pyrus x bretschneideri]	NA	NA	NA	-	6.28898	13.0603	11.3959	0.679421	0.653451	1.19224
MD06G1091700	PREDICTED: WD repeat-containing protein 7 [Malus domestica]	NA	NA	NA	-	4.28195	1.38099	1.28085	1.5295	0.621551	0.570902
MD06G1093000	PREDICTED: respiratory burst oxidase homolog protein A [Pyrus x bretschneideri]	04075(Plant hormone signal transduction)	K13415	EC:2.7.10.1;EC:2.7.11.1	K13447,ko04626,Plant-pathogen interaction	8.94824	3.80474	5.19943	0.418981	0.687799	1.75873
MD06G1094600	PREDICTED: late embryogenesis abundant protein At1g64065 [Malus domestica]	04075(Plant hormone signal transduction)	K14510	EC:2.7.11.1	-	7.9916	31.8285	40.6539	2.72032	0.762046	0.580638
MD06G1099900	PREDICTED: common plant regulatory factor 1-like [Malus domestica]	04626(Plant-pathogen interaction)	K13434	NA	-	5.7963	2.98774	3.16566	1.80034	0.609876	0.632868
MD06G1100200	PREDICTED: probable inactive receptor kinase At4g23740 [Malus domestica]	00230(Purine metabolism);00240(Pyrimidine metabolism)	K00940	EC:2.7.4.6	-	1.26858	1.8106	2.18487	0.424136	0.147837	0.0442528
MD06G1101300	PREDICTED: mitogen-activated protein kinase kinase kinase 7 [Malus domestica]	00052(Galactose metabolism);00520(Amino sugar and nucleotide sugar metabolism)	K01784	EC:5.1.3.2	-	3.58142	7.5287	8.90875	0.565578	1.1044	1.80483
MD06G1105500	PREDICTED: ethylene-responsive transcription factor ERF061 [Malus domestica]	03050(Proteasome)	K03064	NA	-	88.0843	119.858	152.534	24.1447	29.2895	66.1975
MD06G1107800	PREDICTED: nucleoside diphosphate kinase III, chloroplastic/mitochondrial-like [Malus domestica]	00500(Starch and sucrose metabolism)	K01194	EC:3.2.1.28	K00940,ko00230,Purine metabolism;K00940,ko00240,Pyrimidine metabolism	16.6632	7.2123	11.1414	3.88691	2.08878	2.89331
MD06G1108600	PREDICTED: UDP-glucose 4-epimerase GEPI48-like [Pyrus x bretschneideri]	00500(Starch and sucrose metabolism)	K01194	EC:3.2.1.28	K01784,ko00520,Amino sugar and nucleotide sugar metabolism;K01784,ko00052,Galactose metabolism	152.276	74.8719	74.6781	22.2803	18.7286	26.6161
MD06G1109500	PREDICTED: probable inactive ATP-dependent zinc metalloprotease FTSHI 1, chloroplastic [Pyrus x bretschneideri]	NA	NA	NA	-	13.2641	12.0026	12.424	4.27427	4.07628	6.22433
MD06G1113400	PREDICTED: uncharacterized protein LOC108169620 [Malus domestica]	00941(Flavonoid biosynthesis)	K05278	EC:1.14.11.23	-	28.9713	6.8309	8.11116	5.98704	1.83631	2.56515
MD06G1113500	PREDICTED: probable trehalase [Malus domestica]	NA	NA	NA	K01194,ko00500,Starch and sucrose metabolism	69.2375	30.7995	28.1221	4.89585	4.84196	7.56679
MD06G1120300	PREDICTED: uncharacterized protein LOC103437433 isoform X2 [Malus domestica]	04626(Plant-pathogen interaction)	K13447	EC:1.6.3.-;EC:1.11.1.-	-	54.0073	21.8683	33.4573	1.97017	0.49433	0.673123
MD06G1124100	PREDICTED: protein DMR6-LIKE OXYGENASE 2-like [Malus domestica]	04141(Protein processing in endoplasmic reticulum)	K07953	EC:3.6.5.-	-	437.435	60.9256	65.9302	110.438	17.8982	32.2011
MD06G1128400	PREDICTED: chaperone protein ClpD, chloroplastic-like isoform X2 [Pyrus x bretschneideri]	NA	NA	NA	-	51.4611	21.9515	20.6957	20.0941	6.34015	8.85108
MD06G1128500	PREDICTED: respiratory burst oxidase homolog protein C [Malus domestica]	NA	NA	NA	K13447,ko04626,Plant-pathogen interaction	60.3276	44.5481	56.4993	4.0546	1.03325	1.70388
MD06G1133200	PREDICTED: transcription factor bHLH137 [Malus domestica]	04626(Plant-pathogen interaction)	K13436	EC:2.7.11.1	-	318.556	492.504	499.135	82.7745	182.778	239.532
MD06G1138200	PREDICTED: heavy metal-associated isoprenylated plant protein 3-like isoform X4 [Pyrus x bretschneideri]	04122(Sulfur relay system)	K11996	EC:2.7.7.80	-	90.1849	1202.65	1240.95	26.7257	496.592	557.078
MD06G1138800	squamosa promoter-binding-like protein 13A [Malus domestica]	00195(Photosynthesis)	K02723	NA	-	6.64208	2.30878	2.70046	1.07949	0.278516	0.47847
MD06G1140500	PREDICTED: CBS domain-containing protein CBSCBSPB1-like isoform X1 [Malus domestica]	NA	NA	NA	-	10.6438	5.0728	5.99219	1.13145	0.436825	0.762753
MD06G1141900	PREDICTED: ubiquitin-like modifier-activating enzyme 5 isoform X1 [Malus domestica]	NA	NA	NA	-	27.4317	12.8724	12.2595	9.05508	5.16871	4.55447
MD06G1160600	PREDICTED: haloacid dehalogenase-like hydrolase domain-containing protein At3g48420 [Malus domestica]	NA	NA	NA	-	47.8842	6.77965	5.66865	9.32624	1.32388	2.29255
MD06G1165100	PREDICTED: uncharacterized protein LOC103443554 [Malus domestica]	NA	NA	NA	-	16.9655	11.9025	13.7453	4.87006	3.5694	6.04136
MD06G1170600	PREDICTED: phosphatidylinositol transfer protein CSR1 isoform X2 [Malus domestica]	00770(Pantothenate and CoA biosynthesis)	K09680	EC:2.7.1.33	-	2.85417	1.84544	1.5762	1.05345	0.471432	0.858972
MD06G1173100	PREDICTED: probable boron transporter 2 [Pyrus x bretschneideri]	00900(Terpenoid backbone biosynthesis)	K00099	EC:1.1.1.267	-	10.6499	2.16264	1.87433	2.2635	0.170935	0.477558
MD06G1173200	PREDICTED: iron-sulfur cluster assembly protein 1-like [Malus domestica]	04120(Ubiquitin mediated proteolysis)	K10576	EC:2.3.2.23	-	165.607	55.6624	54.0153	51.8141	18.856	24.0898
MD06G1173300	PREDICTED: pantothenate kinase 2-like [Malus domestica]	01200(Carbon metabolism);01230(Biosynthesis of amino acids);00010(Glycolysis / Gluconeogenesis);00030(Pentose phosphate pathway);00051(Fructose and mannose metabolism);00710(Carbon fixation in photosynthetic organisms)	K01623	EC:4.1.2.13	K09680,ko00770,Pantothenate and CoA biosynthesis	48.2946	51.5802	57.3819	15.4372	15.2548	15.3722
MD06G1174000	PREDICTED: 1-deoxy-D-xylulose 5-phosphate reductoisomerase, chloroplastic [Malus domestica]	NA	NA	NA	-	63.5053	12.5591	13.9834	21.076	5.75623	6.31561
MD06G1177800	hypothetical protein PRUPE_ppa012074mg [Prunus persica]	04144(Endocytosis)	K18467	NA	K10576,ko04120,Ubiquitin mediated proteolysis	11.8509	10.1093	10.1957	3.36167	2.9066	4.51907
MD06G1178000	PREDICTED: WAT1-related protein At3g28050-like [Malus domestica]	04626(Plant-pathogen interaction)	K09422	NA	-	6.89087	1.89896	2.11548	1.24747	0.0989122	0.088824
MD06G1185900	PREDICTED: pentatricopeptide repeat-containing protein At1g18900-like [Malus domestica]	NA	NA	NA	-	4.71129	1.97386	2.1495	1.25017	0.100729	0.281418
MD06G1190100	PREDICTED: vacuolar protein sorting-associated protein 29 [Malus domestica]	03050(Proteasome)	K02729	EC:3.4.25.1	K18467,ko04144,Endocytosis	85.4328	29.8541	30.4532	28.5645	13.4142	16.0066
MD06G1192900	myb-related protein 306-like [Malus domestica]	00240(Pyrimidine metabolism)	K00876	EC:2.7.1.48	-	29.2487	10.8442	12.7458	7.73431	1.87243	1.83016
MD06G1196700	PREDICTED: uncharacterized protein LOC103437848 [Malus domestica]	01200(Carbon metabolism);01230(Biosynthesis of amino acids);00010(Glycolysis / Gluconeogenesis);03018(RNA degradation)	K01689	EC:4.2.1.11	-	12.5909	6.29389	7.25475	3.91606	2.20999	3.42499
MD06G1201800	PREDICTED: uncharacterized protein LOC103437876 [Malus domestica]	00903(Limonene and pinene degradation);00945(Stilbenoid, diarylheptanoid and gingerol biosynthesis)	K00517	NA	-	26.6768	7.7452	6.75029	10.0498	2.6063	3.25934
MD06G1207800	PREDICTED: uridine-cytidine kinase C-like [Malus domestica]	00380(Tryptophan metabolism)	K07408	EC:1.14.14.1	-	5.53796	6.14419	6.42112	1.29144	2.09571	2.40847
MD06G1208300	PREDICTED: enolase 1, chloroplastic-like [Malus domestica]	00380(Tryptophan metabolism)	K07408	EC:1.14.14.1	K01689,ko00680,Methane metabolism;K01689,ko00010,Glycolysis / Gluconeogenesis;K01689,ko03018,RNA degradation;K01689,ko04066,HIF-1 signaling pathway;K01689,ko01200,Carbon metabolism;K01689,ko01230,Biosynthesis of amino acids	44.3837	54.5468	67.1787	5.65558	2.96449	4.69206
MD06G1212400	PREDICTED: cytochrome P450 94A2-like [Malus domestica]	00380(Tryptophan metabolism)	K07408	EC:1.14.14.1	-	5.06829	2.05982	1.63387	1.27517	0.518572	0.448434
MD06G1213300	PREDICTED: cytochrome P450 CYP736A12-like [Pyrus x bretschneideri]	00380(Tryptophan metabolism)	K07408	EC:1.14.14.1	-	18.3844	35.0586	19.813	1.26891	1.10988	1.84667
MD06G1213500	PREDICTED: cytochrome P450 CYP736A12-like [Malus domestica]	00190(Oxidative phosphorylation)	K02133	EC:3.6.3.14	-	106.385	95.9453	114.765	4.76863	1.6317	1.40267
MD06G1213800	PREDICTED: cytochrome P450 CYP736A12-like [Malus domestica]	04075(Plant hormone signal transduction)	K14512	EC:2.7.11.24	-	506.793	294.902	299.707	53.0526	10.2555	23.0918
MD06G1214400	PREDICTED: cytochrome P450 CYP736A12-like [Malus domestica]	04070(Phosphatidylinositol signaling system);04626(Plant-pathogen interaction)	K02183	NA	-	1.73618	1.12014	1.11101	0.576373	0.0119156	0.0428013
MD06G1223200	PREDICTED: ATP synthase subunit beta, mitochondrial [Pyrus x bretschneideri]	00040(Pentose and glucuronate interconversions);00051(Fructose and mannose metabolism);00052(Galactose metabolism);00561(Glycerolipid metabolism)	K00011	EC:1.1.1.21	-	6.64799	5.23705	4.71037	2.53428	1.51195	1.74567
MD06G1230300	PREDICTED: mitogen-activated protein kinase 9-like [Malus domestica]	NA	NA	NA	-	22.638	16.9019	15.6908	8.7249	7.08998	7.62657
MD06G1234300	PREDICTED: calmodulin-like [Malus domestica]	NA	NA	NA	K02183,ko05031,Amphetamine addiction;K02183,ko05133,Pertussis;K02183,ko04910,Insulin signaling pathway;K02183,ko04720,Long-term potentiation;K02183,ko04020,Calcium signaling pathway;K02183,ko04022,cGMP-PKG signaling pathway;K02183,ko05010,Alzheimer's disease;K02183,ko04916,Melanogenesis;K02183,ko04924,Renin secretion;K02183,ko04925,Aldosterone synthesis and secretion;K02183,ko04740,Olfactory tran…	57.6212	88.4245	76.1357	7.45233	11.2764	14.5126
MD06G1234700	PREDICTED: uncharacterized protein LOC103438275 [Malus domestica]	NA	NA	NA	-	10.6683	3.0268	3.10225	4.14987	0.902893	1.19608
MD06G1237600	PREDICTED: uncharacterized protein At4g15970-like isoform X3 [Malus domestica]	00591(Linoleic acid metabolism);00592(alpha-Linolenic acid metabolism)	K00454	EC:1.13.11.12	-	16.7877	2.82367	2.35675	5.18529	1.07357	0.694827
MD06G1240300	PREDICTED: uncharacterized protein LOC103438304 [Malus domestica]	00591(Linoleic acid metabolism);00592(alpha-Linolenic acid metabolism)	K00454	EC:1.13.11.12	-	147.826	20.9611	15.679	6.88361	2.60021	2.37093
MD06G1241600	PREDICTED: uncharacterized protein LOC103438314 [Malus domestica]	00591(Linoleic acid metabolism);00592(alpha-Linolenic acid metabolism)	K00454	EC:1.13.11.12	-	5.42152	2.66086	2.42978	2.22977	0.706522	0.883548
MD07G1003600	lipoxygenase [Malus domestica]	NA	NA	NA	-	415.919	151.987	144.02	1.87789	1.31618	2.85262
MD07G1004500	linoleate 13S-lipoxygenase 2-1, chloroplastic-like [Malus domestica]	00906(Carotenoid biosynthesis)	K14595	EC:2.4.1.263	K00454,ko00592,alpha-Linolenic acid metabolism;K00454,ko00591,Linoleic acid metabolism	1397.8	659.723	672.447	5.02344	4.62529	16.3472
MD07G1004600	lipoxygenase [Malus domestica]	NA	NA	NA	-	720.677	520.068	568.534	28.6038	7.05109	18.9159
MD07G1005600	PREDICTED: uncharacterized protein LOC103420438 [Malus domestica]	NA	NA	NA	-	2.68471	1.75979	2.29662	0.918342	0.648735	1.06094
MD07G1007600	PREDICTED: UDP-glucose flavonoid 3-O-glucosyltransferase 7-like [Malus domestica]	03010(Ribosome)	K02863	NA	-	5.69553	16.2892	35.6468	1.1805	2.13129	1.19675
MD07G1009600	PREDICTED: loricrin-like [Malus domestica]	03015(mRNA surveillance pathway)	K14407	NA	-	23.8352	3.89911	3.58557	6.31643	0.07853	0.141041
MD07G1010700	PREDICTED: protein DETOXIFICATION 43-like isoform X1 [Malus domestica]	NA	NA	NA	-	20.3201	26.2783	22.0905	3.85563	9.46671	10.1314
MD07G1022000	PREDICTED: 50S ribosomal protein L1, chloroplastic-like [Malus domestica]	00900(Terpenoid backbone biosynthesis)	K01597	EC:4.1.1.33	K02863,ko03010,Ribosome	94.8651	67.3286	54.4969	7.54027	2.25114	5.5754
MD07G1029700	PREDICTED: probable inactive purple acid phosphatase 27 [Malus domestica]	NA	NA	NA	-	4.98882	3.23123	3.20957	0.729482	0.122533	0.134488
MD07G1045900	PREDICTED: uncharacterized protein LOC103438591 isoform X1 [Malus domestica]	NA	NA	NA	-	54.1124	13.2294	14.4668	20.7946	5.61678	5.47021
MD07G1064100	PREDICTED: diphosphomevalonate decarboxylase MVD2-like [Malus domestica]	NA	NA	NA	K01597,ko00900,Terpenoid backbone biosynthesis	59.0081	18.1287	32.6131	24.2212	6.45042	7.09716
MD07G1065000	PREDICTED: uncharacterized protein LOC103428443 [Malus domestica]	NA	NA	NA	-	9.34214	10.157	14.0839	2.32707	2.18378	2.05604
MD07G1074600	PREDICTED: uncharacterized protein LOC103438868 isoform X1 [Malus domestica]	02010(ABC transporters)	K05665	NA	-	20.7573	24.6022	24.5791	4.42747	9.04311	12.5793
MD07G1082700	PREDICTED: protein NRT1/ PTR FAMILY 7.3-like isoform X1 [Pyrus x bretschneideri]	NA	NA	NA	-	125.772	68.1832	144.111	43.489	26.2217	35.2306
MD07G1083900	PREDICTED: WD-40 repeat-containing protein MSI1-like [Malus domestica]	NA	NA	NA	-	38.2905	39.348	42.9967	13.4039	9.77232	10.4573
MD07G1084200	PREDICTED: putative ABC transporter C family member 15 [Malus domestica]	01230(Biosynthesis of amino acids);00400(Phenylalanine, tyrosine and tryptophan biosynthesis)	K01736	EC:4.2.3.5	-	104.024	72.7835	72.3711	22.8407	22.2181	37.2809
MD07G1087200	PREDICTED: uncharacterized protein LOC103438948 [Malus domestica]	01230(Biosynthesis of amino acids);00400(Phenylalanine, tyrosine and tryptophan biosynthesis)	K01736	EC:4.2.3.5	-	15.6616	9.01868	9.25374	5.4508	3.63281	3.69727
MD07G1091300	PREDICTED: uncharacterized protein LOC103960235 isoform X2 [Pyrus x bretschneideri]	NA	NA	NA	-	27.8384	15.336	16.6766	8.32674	5.96613	7.38263
MD07G1106900	PREDICTED: receptor-like protein 12 [Malus domestica]	01200(Carbon metabolism);01230(Biosynthesis of amino acids);00920(Sulfur metabolism);00270(Cysteine and methionine metabolism);00460(Cyanoamino acid metabolism)	K13034	EC:2.5.1.47;EC:4.4.1.9	-	1.51963	0.686745	0.595306	0.35836	0.0154829	0
MD07G1107400	PREDICTED: receptor-like protein 12 [Pyrus x bretschneideri]	04626(Plant-pathogen interaction)	K13466	NA	-	6.50261	2.38999	2.34983	1.06828	0.0206295	0.197605
MD07G1119000	PREDICTED: LOW QUALITY PROTEIN: uncharacterized protein LOC103436084 [Malus domestica]	NA	NA	NA	-	6.79879	16.9573	19.0549	1.45759	1.74423	3.32039
MD07G1135000	L-3-cyanoalanine synthase 1, mitochondrial [Malus domestica]	NA	NA	NA	K13034,ko00460,Cyanoamino acid metabolism;K13034,ko01230,Biosynthesis of amino acids;K13034,ko00270,Cysteine and methionine metabolism;K13034,ko01200,Carbon metabolism;K13034,ko00920,Sulfur metabolism	3135.74	1885.94	1862.02	545.634	142.07	171.638
MD07G1139300	PREDICTED: leucine-rich repeat receptor protein kinase MSP1-like isoform X2 [Pyrus x bretschneideri]	NA	NA	NA	-	8.91104	2.1482	1.91785	2.74196	0.102318	0.0875068
MD07G1141400	PREDICTED: LOW QUALITY PROTEIN: K(+) efflux antiporter 2, chloroplastic-like [Malus domestica]	03008(Ribosome biogenesis in eukaryotes)	K14544	NA	-	9.2816	11.629	12.7519	1.0098	1.61674	3.52719
MD07G1143800	PREDICTED: common plant regulatory factor 1 isoform X2 [Malus domestica]	04626(Plant-pathogen interaction)	K13448	NA	-	29.1039	21.5453	20.867	10.9912	6.85786	6.96666
MD07G1146600	hypothetical protein MANES_01G247900 [Manihot esculenta]	NA	NA	NA	-	69.6898	192.95	222.228	28.3149	52.4563	84.5237
MD07G1150000	PREDICTED: phosphatidylinositol 4-kinase gamma 4 [Malus domestica]	01200(Carbon metabolism);00010(Glycolysis / Gluconeogenesis);00020(Citrate cycle (TCA cycle));00620(Pyruvate metabolism)	K00161	EC:1.2.4.1	-	10.954	17.5618	17.0575	3.98439	6.06561	8.20608
MD07G1151100	PREDICTED: probable calcium-binding protein CML36 [Malus domestica]	NA	NA	NA	K13448,ko04626,Plant-pathogen interaction	16.2939	3.49886	3.98864	3.49208	1.92187	1.51667
MD07G1152300	PREDICTED: uncharacterized protein LOC103415968 [Malus domestica]	NA	NA	NA	-	23.5904	5.51632	5.88203	5.38198	1.22385	1.62126
MD07G1159600	PREDICTED: pyruvate dehydrogenase E1 component subunit alpha-3, chloroplastic [Malus domestica]	NA	NA	NA	K00161,ko00620,Pyruvate metabolism;K00161,ko04922,Glucagon signaling pathway;K00161,ko01200,Carbon metabolism;K00161,ko00020,Citrate cycle (TCA cycle);K00161,ko05230,Central carbon metabolism in cancer;K00161,ko00010,Glycolysis / Gluconeogenesis;K00161,ko04066,HIF-1 signaling pathway	216.632	430.69	446.55	32.2346	41.8755	57.1294
MD07G1171400	PREDICTED: pumilio homolog 4-like isoform X1 [Malus domestica]	NA	NA	NA	-	5.94098	3.59833	5.76349	1.96874	1.74386	1.97953
MD07G1171700	PREDICTED: ATPase ASNA1 homolog [Malus domestica]	00561(Glycerolipid metabolism)	K01054	EC:3.1.1.23	-	73.5233	21.9322	16.7231	14.6671	6.0812	6.53734
MD07G1173600	PREDICTED: LOW QUALITY PROTEIN: protein ENHANCED DISEASE RESISTANCE 2-like [Malus domestica]	NA	NA	NA	-	16.9986	11.7764	10.643	3.25994	0.336187	0.280022
MD07G1174400	PREDICTED: uncharacterized protein LOC103420999 [Malus domestica]	NA	NA	NA	-	5.55174	4.89065	3.53332	0.864321	0.304824	0.472326
MD07G1174800	PREDICTED: caffeoylshikimate esterase-like [Malus domestica]	04626(Plant-pathogen interaction)	K16224	NA	-	182.965	78.7643	106.102	38.9159	25.9642	42.0794
MD07G1176300	PREDICTED: MLO-like protein 6 [Malus domestica]	NA	NA	NA	-	26.3828	15.8657	10.998	5.17063	4.05443	5.60433
MD07G1186000	-	03040(Spliceosome);04141(Protein processing in endoplasmic reticulum);04144(Endocytosis)	K03283	NA	-	8.6951	7.46195	6.21882	2.06377	3.27795	2.44441
MD07G1186200	PREDICTED: probable receptor-like protein kinase At2g39360 [Malus domestica]	NA	NA	NA	-	33.604	11.3292	11.0597	10.314	2.34038	3.8875
MD07G1191800	PREDICTED: actin-depolymerizing factor 1 [Malus domestica]	NA	NA	NA	K05765,ko04360,Axon guidance;K05765,ko04666,Fc gamma R-mediated phagocytosis;K05765,ko04810,Regulation of actin cytoskeleton;K05765,ko05133,Pertussis	33.3481	31.0335	30.5518	7.36375	7.60622	13.0186
MD07G1196500	heat shock cognate 70 kDa protein 2-like [Malus domestica]	NA	NA	NA	K03283,ko05145,Toxoplasmosis;K03283,ko04144,Endocytosis;K03283,ko04612,Antigen processing and presentation;K03283,ko05169,Epstein-Barr virus infection;K03283,ko05164,Influenza A;K03283,ko04213,Longevity regulating pathway - multiple species;K03283,ko04010,MAPK signaling pathway;K03283,ko05134,Legionellosis;K03283,ko03040,Spliceosome;K03283,ko04915,Estrogen signaling pathway;K03283,ko05162,Measles…	264.32	677.93	688.269	106.476	192.52	332.861
MD07G1200400	PREDICTED: telomere repeat-binding protein 3-like [Malus domestica]	04146(Peroxisome)	K13354	NA	-	23.267	14.9292	14.2203	6.3818	4.75044	7.07046
MD07G1201600	PREDICTED: aspartic proteinase PCS1-like [Malus domestica]	NA	NA	NA	-	15.9127	32.1556	33.707	6.66582	2.48242	7.06704
MD07G1203700	PREDICTED: protein phosphatase 2C 37 [Malus domestica]	04075(Plant hormone signal transduction)	K13946	NA	-	70.3887	45.8482	45.5077	11.6268	15.4855	25.3412
MD07G1214400	PREDICTED: peroxisomal nicotinamide adenine dinucleotide carrier [Malus domestica]	NA	NA	NA	K13354,ko04146,Peroxisome	72.6266	67.7134	76.2135	24.4865	9.26544	12.1737
MD07G1215600	PREDICTED: uncharacterized protein LOC103455109 [Malus domestica]	NA	NA	NA	-	13.7143	7.76354	7.15523	4.29407	2.8694	2.80081
MD07G1215900	PREDICTED: auxin transporter-like protein 2 [Malus domestica]	NA	NA	NA	K13946,ko04075,Plant hormone signal transduction	17.3194	20.1969	15.1705	3.68666	0.957505	2.64873
MD07G1220400	PREDICTED: protein yippee-like [Malus domestica]	00860(Porphyrin and chlorophyll metabolism)	K01599	EC:4.1.1.37	-	13.8981	33.7698	35.105	3.27631	5.42304	7.13581
MD07G1224900	PREDICTED: UTP--glucose-1-phosphate uridylyltransferase 3, chloroplastic-like [Malus domestica]	00500(Starch and sucrose metabolism)	K01177	EC:3.2.1.2	-	10.5305	5.70066	6.33835	3.53543	1.95106	2.46782
MD07G1228300	PREDICTED: biotin carboxyl carrier protein of acetyl-CoA carboxylase-like isoform X2 [Malus domestica]	00908(Zeatin biosynthesis)	K10717	NA	-	69.4635	25.994	27.5391	8.62749	1.47278	2.26251
MD07G1231500	PREDICTED: uroporphyrinogen decarboxylase isoform X1 [Malus domestica]	NA	NA	NA	K01599,ko00860,Porphyrin and chlorophyll metabolism	27.6425	11.5976	9.31234	8.05962	4.53211	5.54267
MD07G1235400	PREDICTED: uncharacterized aarF domain-containing protein kinase At5g05200, chloroplastic-like [Pyrus x bretschneideri]	04626(Plant-pathogen interaction)	K13459	NA	-	23.0145	6.68937	7.26471	9.71824	2.16378	2.51641
MD07G1238800	PREDICTED: cytochrome P450 714A1-like [Malus domestica]	04626(Plant-pathogen interaction)	K13420	EC:2.7.11.1	-	34.1526	43.0904	33.771	2.13291	3.09085	4.20023
MD07G1245100	PREDICTED: protein SUPPRESSOR OF npr1-1, CONSTITUTIVE 1-like [Malus domestica]	NA	NA	NA	-	1.95694	1.00617	0.891167	0.754936	0.395161	0.25477
MD07G1246100	PREDICTED: protein SUPPRESSOR OF npr1-1, CONSTITUTIVE 1-like [Malus domestica]	02010(ABC transporters)	K05655	NA	-	7.89112	7.25945	5.35483	3.09146	1.87648	1.12339
MD07G1249600	PREDICTED: putative kinase-like protein TMKL1 [Malus domestica]	04712(Circadian rhythm - plant)	K16222	NA	-	17.9633	3.81886	4.79764	1.48957	0.1352	0.188861
MD07G1249800	PREDICTED: U-box domain-containing protein 52-like [Malus domestica]	NA	NA	NA	-	58.3657	26.6339	22.7595	11.1409	3.31889	3.68309
MD07G1262600	PREDICTED: ABC transporter B family member 28 [Malus domestica]	NA	NA	NA	-	6.50193	4.21475	3.71554	2.16795	1.29689	1.37132
MD07G1265700	PREDICTED: dof zinc finger protein DOF1.1-like [Malus domestica]	00860(Porphyrin and chlorophyll metabolism)	K00218	EC:1.3.1.33	-	17.9951	49.5922	45.9779	3.49866	4.38074	4.29456
MD07G1266500	PREDICTED: heat stress transcription factor B-2a-like [Malus domestica]	NA	NA	NA	-	5.4003	9.1804	10.3127	1.85245	3.6095	3.79226
MD07G1272600	PREDICTED: tripeptidyl-peptidase 2 [Malus domestica]	00906(Carotenoid biosynthesis)	K15746	EC:1.14.13.129	-	38.8353	45.844	47.3376	6.78101	9.38849	15.9865
MD07G1274000	PREDICTED: LOW QUALITY PROTEIN: short-chain dehydrogenase TIC 32, chloroplastic-like [Malus domestica]	00040(Pentose and glucuronate interconversions);00500(Starch and sucrose metabolism)	K01184	EC:3.2.1.15	-	69.3719	62.3105	40.0946	26.3701	25.0864	25.6833
MD07G1278700	PREDICTED: putative septum site-determining protein minD homolog, chloroplastic [Malus domestica]	04141(Protein processing in endoplasmic reticulum);04626(Plant-pathogen interaction)	K04079	NA	-	12.2516	15.0062	14.4215	3.02995	4.66811	7.30514
MD07G1278900	PREDICTED: beta-carotene hydroxylase 2, chloroplastic-like [Pyrus x bretschneideri]	00100(Steroid biosynthesis)	K07748	EC:1.1.1.170	K15746,ko00906,Carotenoid biosynthesis	1044.7	872.581	574.847	26.4449	23.1011	32.3879
MD07G1279000	PREDICTED: probable polygalacturonase [Malus domestica]	01200(Carbon metabolism);01230(Biosynthesis of amino acids);00010(Glycolysis / Gluconeogenesis);00620(Pyruvate metabolism);00230(Purine metabolism)	K00873	EC:2.7.1.40	-	10.4652	2.80424	3.20273	2.82756	0.581145	0.773146
MD07G1279200	PREDICTED: heat shock protein 83 isoform X1 [Malus domestica]	NA	NA	NA	-	10.7547	96.6823	100.512	4.21237	7.11829	15.7905
MD07G1281900	PREDICTED: reticulon-like protein B1 [Malus domestica]	00750(Vitamin B6 metabolism)	K05275	EC:1.1.1.65	-	94.3037	74.5086	74.0705	32.5577	25.4748	36.8567
MD07G1282700	PREDICTED: plastidial pyruvate kinase 2 [Malus domestica]	NA	NA	NA	-	92.9843	100.944	109.824	33.5695	25.5335	26.6733
MD07G1293200	PREDICTED: putative aminoacrylate hydrolase RutD [Malus domestica]	NA	NA	NA	-	3.2813	1.82755	2.27634	0.717102	0.649549	0.907357
MD07G1297100	homeobox-leucine zipper protein ATHB-12-like [Malus domestica]	00500(Starch and sucrose metabolism)	K00700	EC:2.4.1.18	-	74.9652	517.812	389.701	11.8372	175.968	270.292
MD07G1302200	PREDICTED: UNC93-like protein 1 [Malus domestica]	NA	NA	NA	-	8.15635	1.47545	1.62774	3.27	0.371453	0.693298
MD07G1311300	maltose excess protein 1-like, chloroplastic [Malus domestica]	NA	NA	NA	-	60.5413	16.9539	18.3468	16.8634	5.73743	9.90266
MD08G1002300	PREDICTED: 1,4-alpha-glucan-branching enzyme 1, chloroplastic/amyloplastic-like [Malus domestica]	03050(Proteasome)	K03061	NA	-	132.137	177.31	168.171	41.7773	76.7509	95.8171
MD08G1002600	PREDICTED: uncharacterized protein LOC103440179 [Malus domestica]	04626(Plant-pathogen interaction)	K13412	EC:2.7.11.1	-	23.3977	15.0079	13.0316	7.35602	3.02763	4.66086
MD08G1002900	PREDICTED: uncharacterized protein LOC103927052 [Pyrus x bretschneideri]	NA	NA	NA	-	17.8436	111.837	112.664	4.49672	42.4521	57.0927
MD08G1003700	PREDICTED: ATP-dependent zinc metalloprotease FTSH, chloroplastic [Malus domestica]	NA	NA	NA	-	124.53	120.203	101.544	22.2674	30.1231	38.864
MD08G1008400	PREDICTED: probable nucleoredoxin 2 [Malus domestica]	00500(Starch and sucrose metabolism);00520(Amino sugar and nucleotide sugar metabolism)	K00975	EC:2.7.7.27	-	44.6844	16.2089	10.9503	6.13413	3.86532	1.8051
MD08G1014400	PREDICTED: cytokinin riboside 5'-monophosphate phosphoribohydrolase LOG1-like [Malus domestica]	NA	NA	NA	-	11.4699	7.88834	5.33189	0.575686	0.205442	0.322855
MD08G1025800	BZIP domain class transcription factor [Malus domestica]	01230(Biosynthesis of amino acids);00400(Phenylalanine, tyrosine and tryptophan biosynthesis)	K01850	EC:5.4.99.5	-	310.499	218.45	241.792	29.1033	10.5767	33.5808
MD08G1027900	PREDICTED: glucose-1-phosphate adenylyltransferase large subunit, chloroplastic/amyloplastic-like [Pyrus x bretschneideri]	01210(2-Oxocarboxylic acid metabolism);01230(Biosynthesis of amino acids);00250(Alanine, aspartate and glutamate metabolism);00270(Cysteine and methionine metabolism);00220(Arginine biosynthesis);00330(Arginine and proline metabolism);00350(Tyrosine metabolism);00360(Phenylalanine metabolism);00400(Phenylalanine, tyrosine and tryptophan biosynthesis);00950(Isoquinoline alkaloid biosynthesis);0096…	K00811	EC:2.6.1.1	K00975,ko00500,Starch and sucrose metabolism;K00975,ko00520,Amino sugar and nucleotide sugar metabolism	8.36062	5.72629	7.71351	1.8103	1.98821	4.27032
MD08G1032100	PREDICTED: random slug protein 5-like [Pyrus x bretschneideri]	NA	NA	NA	-	14.6278	1.35589	1.35869	4.48895	0.302891	0.449013
MD08G1057400	PREDICTED: chorismate mutase 2-like [Malus domestica]	04144(Endocytosis)	K12479	NA	K01850,ko00400,Phenylalanine, tyrosine and tryptophan biosynthesis;K01850,ko01230,Biosynthesis of amino acids	9.89824	1.52428	1.05034	3.09829	0.117075	0.140179
MD08G1060300	PREDICTED: aspartate aminotransferase, chloroplastic [Malus domestica]	NA	NA	NA	-	194.022	100.95	103.898	54.4867	33.5372	39.1127
MD08G1061000	PREDICTED: protein REVERSION-TO-ETHYLENE SENSITIVITY1 [Pyrus x bretschneideri]	04626(Plant-pathogen interaction)	K13459	NA	-	36.8772	10.3548	10.1182	13.9679	4.03716	3.49254
MD08G1064700	PREDICTED: graves disease carrier protein-like [Pyrus x bretschneideri]	00230(Purine metabolism)	K00759	EC:2.4.2.7	-	51.2764	16.2229	13.1146	12.3727	2.05315	2.04861
MD08G1079200	PREDICTED: protein PHLOEM PROTEIN 2-LIKE A10-like [Malus domestica]	04145(Phagosome)	K01365	EC:3.4.22.15	-	51.0295	158.676	143.408	17.8785	49.8773	64.7796
MD08G1083600	PREDICTED: probable disease resistance protein At4g27220 [Malus domestica]	NA	NA	NA	-	1.82588	2.58357	2.53089	0.668024	0.161897	0.397896
MD08G1086300	PREDICTED: adenine phosphoribosyltransferase 1, chloroplastic-like [Pyrus x bretschneideri]	NA	NA	NA	-	2924.17	1353.54	1529.11	1228.13	227.904	158.922
MD08G1093900	PREDICTED: low-temperature-induced cysteine proteinase-like [Malus domestica]	NA	NA	NA	-	285.845	129.31	115.522	52.0435	16.2539	25.016
MD08G1101200	PREDICTED: coenzyme Q-binding protein COQ10 homolog, mitochondrial [Malus domestica]	NA	NA	NA	-	14.3161	4.71928	3.92449	4.82979	0.437439	1.00873
MD08G1102100	PREDICTED: protein WEAK CHLOROPLAST MOVEMENT UNDER BLUE LIGHT 1-like [Malus domestica]	NA	NA	NA	-	8.20429	19.2098	18.4987	2.81343	5.09892	4.77723
MD08G1103400	PREDICTED: uncharacterized protein LOC103949765 [Pyrus x bretschneideri]	00520(Amino sugar and nucleotide sugar metabolism)	K12446	EC:2.7.1.46	-	12.8835	9.33923	8.96865	3.66647	1.31923	2.36936
MD08G1103700	PREDICTED: uncharacterized protein LOC103421139 [Malus domestica]	NA	NA	NA	-	4.97099	5.53356	4.61802	1.20402	0.273414	0.140302
MD08G1112100	PREDICTED: lachrymatory-factor synthase [Malus domestica]	00940(Phenylpropanoid biosynthesis);00945(Stilbenoid, diarylheptanoid and gingerol biosynthesis);00941(Flavonoid biosynthesis)	K13065	EC:2.3.1.133	-	29.9866	38.6648	36.3134	3.93081	20.401	14.9156
MD08G1124400	PREDICTED: L-arabinokinase-like isoform X2 [Malus domestica]	02010(ABC transporters)	K05681	NA	K12446,ko00520,Amino sugar and nucleotide sugar metabolism	158.272	107.961	95.6136	7.71207	10.9185	16.0124
MD08G1134900	PREDICTED: uncharacterized protein LOC103441384 [Malus domestica]	NA	NA	NA	-	7.278	2.92427	3.77668	3.05123	1.01131	1.53101
MD08G1137000	PREDICTED: uncharacterized acetyltransferase At3g50280-like [Malus domestica]	04712(Circadian rhythm - plant)	K16241	NA	-	116.215	145.944	128.27	10.1621	24.2884	57.6929
MD08G1140900	PREDICTED: pleiotropic drug resistance protein 1-like isoform X1 [Malus domestica]	NA	NA	NA	-	1.89567	3.77052	1.10225	0.419215	0.277167	0.169186
MD08G1141900	PREDICTED: uncharacterized protein LOC103454307 isoform X1 [Malus domestica]	NA	NA	NA	-	33.0586	22.4174	24.4122	9.89541	10.7476	12.2516
MD08G1147100	transcription factor HY5 [Malus domestica]	NA	NA	NA	K16241,ko04712,Circadian rhythm - plant	19.392	99.06	67.7115	8.01391	31.2597	44.9819
MD08G1152600	PREDICTED: protein MEMO1-like [Malus domestica]	01212(Fatty acid metabolism);00061(Fatty acid biosynthesis);00071(Fatty acid degradation);04146(Peroxisome)	K01897	EC:6.2.1.3	-	7.6002	1.53403	2.06033	0.899559	0.193101	0.323692
MD08G1153200	PREDICTED: uncharacterized protein LOC103441245 [Malus domestica]	NA	NA	NA	-	4.70518	3.54975	3.06795	1.83142	0.995806	2.20121
MD08G1153600	PREDICTED: homeobox protein knotted-1-like 3 isoform X1 [Malus domestica]	00770(Pantothenate and CoA biosynthesis)	K01922	EC:6.3.2.5	-	39.1815	115.293	95.332	13.906	38.0394	56.5804
MD08G1163100	PREDICTED: long chain acyl-CoA synthetase 9, chloroplastic-like [Malus domestica]	01200(Carbon metabolism);01230(Biosynthesis of amino acids);00010(Glycolysis / Gluconeogenesis);00260(Glycine, serine and threonine metabolism)	K01834	EC:5.4.2.11	K01897,ko00071,Fatty acid degradation;K01897,ko02024,Quorum sensing;K01897,ko00061,Fatty acid biosynthesis;K01897,ko01212,Fatty acid metabolism;K01897,ko04146,Peroxisome;K01897,ko03320,PPAR signaling pathway;K01897,ko04920,Adipocytokine signaling pathway	10.3605	5.61921	7.71256	0.315431	0.114317	0.153986
MD08G1173600	PREDICTED: uncharacterized protein LOC103956999 isoform X2 [Pyrus x bretschneideri]	03013(RNA transport);03015(mRNA surveillance pathway)	K14326	EC:3.6.4.-	-	12.5523	10.9408	6.99389	2.04528	3.38102	4.17779
MD08G1174000	PREDICTED: phosphopantothenate--cysteine ligase 2-like isoform X1 [Malus domestica]	NA	NA	NA	-	15.5295	6.2247	6.00294	4.4702	2.49801	2.15082
MD08G1179400	PREDICTED: 2,3-bisphosphoglycerate-dependent phosphoglycerate mutase isoform X2 [Malus domestica]	00750(Vitamin B6 metabolism)	K05275	EC:1.1.1.65	K01834,ko00680,Methane metabolism;K01834,ko01230,Biosynthesis of amino acids;K01834,ko05230,Central carbon metabolism in cancer;K01834,ko00010,Glycolysis / Gluconeogenesis;K01834,ko00260,Glycine, serine and threonine metabolism;K01834,ko04922,Glucagon signaling pathway;K01834,ko01200,Carbon metabolism	32.6976	12.1683	13.2801	5.41864	0.748752	3.00766
MD08G1179600	PREDICTED: uncharacterized ATP-dependent helicase C29A10.10c-like isoform X3 [Malus domestica]	00500(Starch and sucrose metabolism)	K00700	EC:2.4.1.18	-	25.1862	12.604	11.3972	9.6744	4.23461	4.6241
MD08G1182400	PREDICTED: uncharacterized protein LOC103453327 [Malus domestica]	NA	NA	NA	-	112.336	71.9831	48.2983	1.91863	1.57949	1.5897
MD08G1188500	PREDICTED: homeobox-leucine zipper protein ATHB-6-like [Malus domestica]	NA	NA	NA	-	2.73419	8.19046	10.2624	0.898327	0.282609	0.939945
MD08G1188900	PREDICTED: isoamylase 3, chloroplastic-like [Malus domestica]	00910(Nitrogen metabolism)	K01673	EC:4.2.1.1	-	38.9143	25.0111	26.7466	8.62237	5.34753	6.99971
MD08G1189500	PREDICTED: blue copper protein [Malus domestica]	NA	NA	NA	-	10.943	6.44805	1.39954	3.39421	0.0502063	0
MD08G1195300	PREDICTED: rho GTPase-activating protein REN1-like [Malus domestica]	NA	NA	NA	-	1.61155	2.78684	2.24503	0.538215	0.43355	1.23916
MD08G1196500	PREDICTED: beta carbonic anhydrase 5, chloroplastic-like isoform X1 [Malus domestica]	00592(alpha-Linolenic acid metabolism)	K05894	EC:1.3.1.42	-	9.7375	1.66329	1.28395	1.6807	0.318033	0.609272
MD08G1202800	PREDICTED: protein CLT2, chloroplastic isoform X1 [Prunus mume]	00860(Porphyrin and chlorophyll metabolism)	K13544	EC:3.1.1.82	-	11.1851	1.83044	2.51538	1.35603	0.543115	0.916327
MD08G1208000	PREDICTED: phosphoglycerate mutase-like protein 1 isoform X1 [Pyrus x bretschneideri]	01212(Fatty acid metabolism);00061(Fatty acid biosynthesis);00780(Biotin metabolism)	K02372	EC:4.2.1.59	-	71.2503	13.8404	14.4936	7.8771	3.04463	5.15574
MD08G1216100	PREDICTED: 12-oxophytodienoate reductase 2-like [Malus domestica]	NA	NA	NA	K05894,ko00592,alpha-Linolenic acid metabolism	87.2856	30.716	27.4837	19.5864	6.05829	8.24464
MD08G1216700	PREDICTED: putative methylesterase 14, chloroplastic [Malus domestica]	NA	NA	NA	-	12.1417	4.91902	5.94786	4.64791	1.3187	1.88258
MD08G1220800	PREDICTED: 3-hydroxyacyl-[acyl-carrier-protein] dehydratase FabZ-like [Malus domestica]	00670(One carbon pool by folate)	K00288	EC:1.5.1.5;EC:3.5.4.9	K02372,ko00061,Fatty acid biosynthesis;K02372,ko00780,Biotin metabolism;K02372,ko01212,Fatty acid metabolism	4.33021	6.71384	8.30075	0.988859	0.0381259	0.13695
MD08G1232200	PREDICTED: 11S globulin seed storage protein 2-like [Pyrus x bretschneideri]	NA	NA	NA	-	4369.59	1516.17	1544.81	737.978	86.9222	111
MD08G1235500	PREDICTED: putative transferase At1g60990, chloroplastic [Malus domestica]	03010(Ribosome)	K02899	NA	-	10.1951	8.01285	8.06978	2.86317	2.07037	3.03739
MD08G1243500	PREDICTED: bifunctional protein FolD 4, chloroplastic-like [Malus domestica]	NA	NA	NA	-	9.13135	7.18727	7.21348	3.64139	2.85701	3.55766
MD08G1243700	PREDICTED: prolycopene isomerase, chloroplastic [Pyrus x bretschneideri]	NA	NA	NA	-	3.08962	2.0286	1.2859	1.34989	0.160074	0.123213
MD09G1004400	PREDICTED: mitochondrial phosphate carrier protein 3, mitochondrial-like [Malus domestica]	00564(Glycerophospholipid metabolism)	K00006	EC:1.1.1.8	-	83.4952	12.1555	12.9224	28.4362	2.23418	3.90501
MD09G1010200	PREDICTED: 50S ribosomal protein L27, chloroplastic-like [Malus domestica]	00910(Nitrogen metabolism)	K02575	NA	K02899,ko03010,Ribosome	18.2779	23.971	18.9146	6.95823	10.3363	9.3013
MD09G1015700	PREDICTED: uncharacterized protein LOC103442154 [Malus domestica]	00910(Nitrogen metabolism)	K02575	NA	-	10.3734	67.2264	64.9387	1.86548	11.8989	8.24833
MD09G1015800	PREDICTED: uncharacterized protein LOC103442155 [Malus domestica]	NA	NA	NA	-	8.84949	33.4962	38.0646	1.78976	1.68959	1.89658
MD09G1020100	PREDICTED: glycerol-3-phosphate dehydrogenase [NAD(+)]-like [Malus domestica]	04626(Plant-pathogen interaction)	K18875	NA	-	12.6078	23.1194	31.0667	0.807544	1.15234	1.83425
MD09G1028800	PREDICTED: high affinity nitrate transporter 2.7-like [Malus domestica]	00562(Inositol phosphate metabolism);04070(Phosphatidylinositol signaling system)	K01099	EC:3.1.3.36	-	9.36571	10.9052	9.76598	3.0031	2.56462	5.61
MD09G1028900	PREDICTED: high affinity nitrate transporter 2.7-like [Malus domestica]	04070(Phosphatidylinositol signaling system)	K13024	EC:2.7.4.24	-	17.3101	30.7946	39.3398	6.63429	9.93376	19.5529
MD09G1034800	PREDICTED: deoxynucleoside triphosphate triphosphohydrolase SAMHD1 homolog [Malus domestica]	NA	NA	NA	-	14.6787	6.9279	6.88147	3.62979	1.77333	2.21504
MD09G1039700	PREDICTED: senescence-associated carboxylesterase 101-like [Malus domestica]	00500(Starch and sucrose metabolism)	K00703	EC:2.4.1.21	-	29.4455	37.7894	40.7941	1.47788	2.58641	4.71152
MD09G1042100	PREDICTED: type I inositol polyphosphate 5-phosphatase 4-like isoform X1 [Malus domestica]	NA	NA	NA	-	50.423	97.8944	106.333	6.33505	1.57524	6.2029
MD09G1045700	PREDICTED: inositol hexakisphosphate and diphosphoinositol-pentakisphosphate kinase 2 [Malus domestica]	NA	NA	NA	-	69.0277	19.2481	20.6667	1.67747	1.53026	1.52687
MD09G1049600	PREDICTED: uncharacterized protein LOC103404432 [Malus domestica]	01200(Carbon metabolism);01212(Fatty acid metabolism);00620(Pyruvate metabolism);00640(Propanoate metabolism);00061(Fatty acid biosynthesis);00253(Tetracycline biosynthesis)	K02160	NA	-	112.982	238.933	164.466	6.71659	43.417	43.5596
MD09G1052000	PREDICTED: granule-bound starch synthase 2, chloroplastic/amyloplastic-like [Malus domestica]	03010(Ribosome)	K02996	NA	K00703,ko00500,Starch and sucrose metabolism	10.7909	11.8882	10.6834	0.748994	1.43984	1.94675
MD09G1056700	PREDICTED: uncharacterized protein LOC103421505 [Malus domestica]	00500(Starch and sucrose metabolism)	K01176	EC:3.2.1.1	-	3.9962	1.78508	1.89407	1.62562	0.711145	0.709571
MD09G1057400	PREDICTED: phosphoglycerate mutase-like protein 1 [Malus domestica]	NA	NA	NA	-	40.9456	33.1375	30.7075	3.78903	7.85422	13.6434
MD09G1064200	PREDICTED: biotin carboxyl carrier protein of acetyl-CoA carboxylase 2, chloroplastic [Malus domestica]	04144(Endocytosis)	K05747	NA	-	44.1583	51.1992	55.5734	6.49315	6.04598	9.31284
MD09G1065100	PREDICTED: 30S ribosomal protein S9, chloroplastic-like [Malus domestica]	00591(Linoleic acid metabolism)	K15718	EC:1.13.11.58	K02996,ko03010,Ribosome	73.8546	21.4187	16.3556	23.9487	7.10203	9.33031
MD09G1066000	PREDICTED: uncharacterized protein LOC103421512 [Malus domestica]	04144(Endocytosis);04145(Phagosome)	K07889	NA	-	19.5822	11.7781	11.5413	1.92971	0.941964	1.64413
MD09G1066500	PREDICTED: exocyst complex component EXO70B1-like [Malus domestica]	NA	NA	NA	-	3.00152	4.15278	4.21406	0.635496	0.922489	1.23077
MD09G1067200	PREDICTED: ninja-family protein AFP3-like [Malus domestica]	00592(alpha-Linolenic acid metabolism)	K10528	EC:4.1.2.-	-	3.11891	4.26225	4.44523	1.09701	0.984961	0.877312
MD09G1069500	probable linoleate 9S-lipoxygenase 5 [Malus domestica]	00561(Glycerolipid metabolism);00564(Glycerophospholipid metabolism)	K13506	EC:2.3.1.15	K15718,ko00591,Linoleic acid metabolism	446.292	217.353	245.473	99.849	30.8602	35.1265
MD09G1069800	PREDICTED: septum-promoting GTP-binding protein 1 [Malus domestica]	04075(Plant hormone signal transduction);04626(Plant-pathogen interaction)	K13416	EC:2.7.10.1;EC:2.7.11.1	-	39.7962	16.0763	14.8528	5.2823	1.75627	2.1433
MD09G1070000	PREDICTED: glutamate receptor 3.7 [Pyrus x bretschneideri]	04141(Protein processing in endoplasmic reticulum)	K13525	NA	-	5.48821	2.80175	2.49356	1.29314	0.203874	0.37037
MD09G1071400	PREDICTED: fatty acid hydroperoxide lyase, chloroplastic [Pyrus x bretschneideri]	00330(Arginine and proline metabolism)	K00318	EC:1.5.-.-	K10528,ko00592,alpha-Linolenic acid metabolism	107.313	95.8824	69.9342	8.17446	5.49163	7.69873
MD09G1075800	PREDICTED: uncharacterized protein At1g04910-like [Malus domestica]	04626(Plant-pathogen interaction)	K13430	EC:2.7.11.1	-	5.64626	4.0363	4.06103	2.32706	0.878098	2.59871
MD09G1079400	PREDICTED: protein NSP-INTERACTING KINASE 1-like [Malus domestica]	00940(Phenylpropanoid biosynthesis)	K09753	EC:1.2.1.44	-	3.1307	1.76858	2.22496	0.992929	0.338512	0.41627
MD09G1080100	PREDICTED: probable inactive ATP-dependent zinc metalloprotease FTSHI 3, chloroplastic [Malus domestica]	NA	NA	NA	-	7.64676	9.53962	8.945	2.76525	3.33889	4.49514
MD09G1080200	PREDICTED: proline dehydrogenase 2, mitochondrial-like [Malus domestica]	NA	NA	NA	K00318,ko00330,Arginine and proline metabolism	6.40811	2.40183	2.06994	2.69121	0.702204	0.224208
MD09G1081800	PREDICTED: proline-rich receptor-like protein kinase PERK8 [Malus domestica]	NA	NA	NA	-	4.54163	4.70831	4.99107	1.74889	1.38951	1.91547
MD09G1082100	PREDICTED: cinnamoyl-CoA reductase 2-like [Malus domestica]	00520(Amino sugar and nucleotide sugar metabolism)	K01183	EC:3.2.1.14	-	21.1656	74.0255	79.5184	3.59767	4.459	4.59226
MD09G1087300	PREDICTED: 30S ribosomal protein 3, chloroplastic-like [Malus domestica]	00520(Amino sugar and nucleotide sugar metabolism)	K01183	EC:3.2.1.14	-	11.7705	5.59368	4.11077	3.01853	1.73654	1.17927
MD09G1088000	PREDICTED: uncharacterized protein LOC103947825 [Pyrus x bretschneideri]	NA	NA	NA	-	13.0336	15.3936	10.8617	0.960231	0.017186	0.0205776
MD09G1092800	PREDICTED: uncharacterized protein LOC103442539 [Malus domestica]	01200(Carbon metabolism);00020(Citrate cycle (TCA cycle));00310(Lysine degradation)	K00658	EC:2.3.1.61	-	33.2565	38.4086	45.0021	14.1676	13.8673	20.5066
MD09G1094400	PREDICTED: receptor-like serine/threonine-protein kinase SD1-8 isoform X2 [Pyrus x bretschneideri]	03015(mRNA surveillance pathway)	K11584	NA	-	18.6112	17.5826	13.0969	4.59263	3.4627	3.66473
MD09G1095200	PREDICTED: receptor-like serine/threonine-protein kinase SD1-8 [Pyrus x bretschneideri]	NA	NA	NA	-	20.2692	26.6291	25.2736	3.96129	6.76051	9.24799
MD09G1097200	PREDICTED: protein THYLAKOID FORMATION1, chloroplastic-like [Malus domestica]	01212(Fatty acid metabolism);01040(Biosynthesis of unsaturated fatty acids)	K00507	EC:1.14.19.1	-	30.6096	31.4848	23.1912	7.73647	11.4518	11.5947
MD09G1110700	PREDICTED: dihydrolipoyllysine-residue succinyltransferase component of 2-oxoglutarate dehydrogenase complex 1, mitochondrial-like [Pyrus x bretschneideri]	01212(Fatty acid metabolism);01040(Biosynthesis of unsaturated fatty acids)	K00507	EC:1.14.19.1	K00658,ko00310,Lysine degradation;K00658,ko01200,Carbon metabolism;K00658,ko00020,Citrate cycle (TCA cycle)	85.7801	18.3681	19.6533	22.3669	6.33472	7.55766
MD09G1112300	PREDICTED: serine/threonine protein phosphatase 2A 59 kDa regulatory subunit B' gamma isoform-like [Malus domestica]	00270(Cysteine and methionine metabolism)	K05933	EC:1.14.17.4	K11584,ko04113,Meiosis - yeast;K11584,ko03015,mRNA surveillance pathway;K11584,ko04114,Oocyte meiosis;K11584,ko04728,Dopaminergic synapse;K11584,ko04261,Adrenergic signaling in cardiomyocytes;K11584,ko04071,Sphingolipid signaling pathway;K11584,ko04152,AMPK signaling pathway;K11584,ko04151,PI3K-Akt signaling pathway	9.5177	3.31483	3.24359	3.8263	0.834529	1.50969
MD09G1113700	PREDICTED: uncharacterized protein LOC103442644 [Malus domestica]	00561(Glycerolipid metabolism)	K00679	EC:2.3.1.158	-	6.28296	2.44823	2.1048	2.36141	0.820265	1.41495
MD09G1114000	PREDICTED: palmitoyl-monogalactosyldiacylglycerol delta-7 desaturase, chloroplastic-like [Malus domestica]	03013(RNA transport)	K00784	EC:3.1.26.11	-	22.0748	9.94865	11.9473	3.95748	2.1989	2.81588
MD09G1114100	PREDICTED: palmitoyl-monogalactosyldiacylglycerol delta-7 desaturase, chloroplastic-like [Malus domestica]	04626(Plant-pathogen interaction)	K13457	NA	-	5.83116	6.44983	7.17275	1.16344	2.25854	3.07542
MD09G1114800	PREDICTED: 1-aminocyclopropane-1-carboxylate oxidase [Malus domestica]	NA	NA	NA	-	3.99246	2.13523	1.42823	1.29513	0.380517	0.824438
MD09G1116400	PREDICTED: GDSL esterase/lipase At2g04570 [Malus domestica]	NA	NA	NA	-	3.09033	2.13513	2.73378	0.747023	0.0879598	0
MD09G1117300	PREDICTED: ribonuclease Z, chloroplastic [Malus domestica]	04144(Endocytosis)	K18443	NA	-	13.4462	6.20464	5.8844	4.6292	2.47509	3.20062
MD09G1128300	hypothetical protein PRUPE_ppa002186mg [Prunus persica]	00500(Starch and sucrose metabolism);00520(Amino sugar and nucleotide sugar metabolism)	K00975	EC:2.7.7.27	-	66.0893	49.8613	47.9743	4.68718	3.07387	11.4185
MD09G1129600	PREDICTED: uncharacterized protein LOC103443013 [Malus domestica]	00520(Amino sugar and nucleotide sugar metabolism)	K12448	EC:5.1.3.5	-	15.4777	2.89158	3.16554	6.27667	1.52527	1.41122
MD09G1131400	PREDICTED: probable E3 ubiquitin-protein ligase XERICO [Malus domestica]	04075(Plant hormone signal transduction)	K14494	NA	-	106.682	14.4279	14.9516	12.4698	0.797032	2.44545
MD09G1132600	PREDICTED: subtilisin-like protease SBT5.3 isoform X2 [Malus domestica]	00906(Carotenoid biosynthesis)	K02291	EC:2.5.1.32	-	6.87032	2.71665	1.87954	0.700029	0.227977	0.125985
MD09G1133900	glucose-1-phosphate adenylyltransferase small subunit, chloroplastic/amyloplastic [Malus domestica]	NA	NA	NA	K00975,ko00500,Starch and sucrose metabolism;K00975,ko00520,Amino sugar and nucleotide sugar metabolism	46.562	38.2043	41.3385	7.87673	3.21218	8.24729
MD09G1137100	PREDICTED: UDP-arabinose 4-epimerase 1-like [Malus domestica]	00510(N-Glycan biosynthesis);04141(Protein processing in endoplasmic reticulum)	K01230	EC:3.2.1.113	K12448,ko00520,Amino sugar and nucleotide sugar metabolism	5.06646	1.46213	0.905062	1.75468	0.244109	0.180937
MD09G1137800	scarecrow-like protein 23 [Malus domestica]	04712(Circadian rhythm - plant)	K12115	NA	-	28.6441	23.4459	23.8459	10.3292	5.21309	9.17455
MD09G1146800	phytoene synthase [Malus domestica]	00052(Galactose metabolism)	K06617	EC:2.4.1.82	-	140.194	116.502	111.309	42.6048	11.3775	20.6117
MD09G1158800	PREDICTED: glutamyl-tRNA reductase-binding protein, chloroplastic [Malus domestica]	00040(Pentose and glucuronate interconversions);00500(Starch and sucrose metabolism)	K01051	EC:3.1.1.11	-	34.0114	21.8921	20.796	6.81998	6.03304	9.65552
MD09G1160700	PREDICTED: mannosyl-oligosaccharide 1,2-alpha-mannosidase MNS1-like [Malus domestica]	00561(Glycerolipid metabolism)	K00679	EC:2.3.1.158	-	16.8491	10.4096	11.798	4.7252	1.63086	3.05885
MD09G1161500	PREDICTED: F-box/kelch-repeat protein At1g51550-like [Malus domestica]	NA	NA	NA	-	13.9008	7.69432	7.95931	3.98618	3.23685	4.25418
MD09G1161700	PREDICTED: probable galactinol--sucrose galactosyltransferase 2 [Malus domestica]	04144(Endocytosis)	K18443	NA	K06617,ko00052,Galactose metabolism	30.591	1.7299	1.21821	5.65632	0.6794	0.484957
MD09G1172600	pectinesterase-like [Malus domestica]	00190(Oxidative phosphorylation);00860(Porphyrin and chlorophyll metabolism)	K02259	NA	K01051,ko00040,Pentose and glucuronate interconversions;K01051,ko00500,Starch and sucrose metabolism	170.224	145.907	192.545	13.4359	3.2965	4.15077
MD09G1175400	PREDICTED: GDSL esterase/lipase 1-like [Malus domestica]	NA	NA	NA	-	27.7113	5.61862	5.8099	11.7714	1.69743	2.26586
MD09G1176600	PREDICTED: dormancy-associated protein homolog 4 [Malus domestica]	00052(Galactose metabolism);00600(Sphingolipid metabolism);00531(Glycosaminoglycan degradation);00604(Glycosphingolipid biosynthesis - ganglio series);00511(Other glycan degradation)	K12309	EC:3.2.1.23	-	45.2916	15.5617	8.89561	6.2302	6.41665	2.89061
MD09G1180500	PREDICTED: subtilisin-like protease SBT1.4 [Malus domestica]	NA	NA	NA	-	51.8263	55.2159	56.8888	6.36569	1.35405	1.86896
MD09G1184000	uncharacterized protein LOC103453608 [Malus domestica]	NA	NA	NA	-	9.2663	3.73158	7.91382	1.89011	0.683235	0.899875
MD09G1192200	PREDICTED: putative hydrolase C777.06c [Malus domestica]	04144(Endocytosis)	K12471	NA	-	25.1552	5.12901	5.98952	3.48228	1.38135	1.33035
MD09G1193900	PREDICTED: beta-galactosidase 1 [Malus domestica]	04626(Plant-pathogen interaction)	K16224	NA	-	6.53237	3.21688	6.37797	0.566941	0.501766	0.442685
MD09G1194100	PREDICTED: mini-ribonuclease 3-like isoform X1 [Malus domestica]	00561(Glycerolipid metabolism)	K00679	EC:2.3.1.158	-	24.3582	13.3466	12.6615	4.71174	4.84955	5.47695
MD09G1197500	PREDICTED: jacalin-related lectin 19-like [Malus domestica]	01200(Carbon metabolism);00010(Glycolysis / Gluconeogenesis);00051(Fructose and mannose metabolism);00052(Galactose metabolism);00500(Starch and sucrose metabolism);00520(Amino sugar and nucleotide sugar metabolism);00524(Butirosin and neomycin biosynthesis)	K00844	EC:2.7.1.1	-	32.8902	74.8645	83.46	8.32364	7.65021	10.5545
MD09G1197900	PREDICTED: uncharacterized protein LOC103443716 [Malus domestica]	NA	NA	NA	-	3.45704	0.934331	0.806298	0.968877	0.372807	0.159421
MD09G1199300	PREDICTED: probable LRR receptor-like serine/threonine-protein kinase At1g05700 [Pyrus x bretschneideri]	01200(Carbon metabolism);00630(Glyoxylate and dicarboxylate metabolism);00260(Glycine, serine and threonine metabolism)	K15919	NA	-	13.7029	8.36963	4.18282	1.30667	1.01111	0.932647
MD09G1199700	PREDICTED: GDSL esterase/lipase APG-like [Malus domestica]	04144(Endocytosis)	K10396	NA	-	186.415	36.5141	45.7507	0.770685	0.176499	0.669211
MD09G1202200	uncharacterized protein LOC103443741 [Malus domestica]	NA	NA	NA	K00844,ko00052,Galactose metabolism;K00844,ko00010,Glycolysis / Gluconeogenesis;K00844,ko04910,Insulin signaling pathway;K00844,ko00524,Neomycin, kanamycin and gentamicin biosynthesis;K00844,ko04930,Type II diabetes mellitus;K00844,ko00051,Fructose and mannose metabolism;K00844,ko00521,Streptomycin biosynthesis;K00844,ko04973,Carbohydrate digestion and absorption;K00844,ko00500,Starch and sucrose…	6.4664	6.09258	6.67472	2.427	1.72409	2.6338
MD09G1202600	PREDICTED: clavaminate synthase-like protein At3g21360 [Pyrus x bretschneideri]	01230(Biosynthesis of amino acids);00350(Tyrosine metabolism);00360(Phenylalanine metabolism);00400(Phenylalanine, tyrosine and tryptophan biosynthesis);00950(Isoquinoline alkaloid biosynthesis);00960(Tropane, piperidine and pyridine alkaloid biosynthesis)	K15849	EC:2.6.1.1;EC:2.6.1.78	-	55.1823	48.4548	41.7428	13.3158	13.507	12.938
MD09G1209800	PREDICTED: glyoxylate/hydroxypyruvate reductase A HPR2-like [Malus domestica]	NA	NA	NA	-	11.3352	2.26247	2.1184	4.62768	0.734612	0.783977
MD09G1211100	PREDICTED: kinesin-13A isoform X2 [Malus domestica]	00561(Glycerolipid metabolism);04626(Plant-pathogen interaction)	K00864	EC:2.7.1.30	-	9.59774	12.5909	13.3968	1.25375	0.815828	1.8926
MD09G1215300	PREDICTED: E3 ubiquitin-protein ligase At1g63170-like isoform X1 [Malus domestica]	00940(Phenylpropanoid biosynthesis)	K09753	EC:1.2.1.44	-	12.3347	9.16066	9.87188	3.19496	4.13203	4.9187
MD09G1216600	PREDICTED: aspartate aminotransferase-like [Malus domestica]	00053(Ascorbate and aldarate metabolism)	K00225	EC:1.3.2.3	-	38.3559	27.1389	32.3787	13.7851	12.752	17.1343
MD09G1220700	PREDICTED: uncharacterized protein LOC103940279 [Pyrus x bretschneideri]	03050(Proteasome)	K03061	NA	-	43.3153	22.9553	24.9529	16.4106	6.42889	9.7847
MD09G1222300	PREDICTED: glycerol kinase-like [Pyrus x bretschneideri]	04626(Plant-pathogen interaction)	K13425	NA	K00864,ko04626,Plant-pathogen interaction;K00864,ko03320,PPAR signaling pathway;K00864,ko00561,Glycerolipid metabolism	12.2171	7.67843	8.59227	0.46563	0.208607	0.549504
MD09G1224200	PREDICTED: cinnamoyl-CoA reductase 1-like [Malus domestica]	NA	NA	NA	-	64.5259	53.9835	40.7832	14.4102	1.35621	2.97421
MD09G1228400	PREDICTED: uncharacterized protein LOC103407689 [Malus domestica]	04626(Plant-pathogen interaction)	K13434	NA	-	4.65178	1.60865	1.42739	1.53887	0.458985	0.468746
MD09G1234500	PREDICTED: ATP-dependent zinc metalloprotease FTSH 2, chloroplastic [Pyrus x bretschneideri]	NA	NA	NA	-	119.132	88.5981	65.6706	17.1512	12.6068	18.0829
MD09G1235100	PREDICTED: probable WRKY transcription factor 69 [Malus domestica]	NA	NA	NA	-	12.5032	4.46314	4.95448	5.22096	1.999	1.75992
MD09G1238000	PREDICTED: uncharacterized protein LOC103405544 isoform X1 [Malus domestica]	NA	NA	NA	-	25.9179	16.3922	15.4266	8.10971	4.7751	5.98249
MD09G1252000	PREDICTED: ethylene-responsive transcription factor ERF054-like [Malus domestica]	NA	NA	NA	-	4.82008	0.951445	0.832025	0.757997	0.342966	0.508422
MD09G1253500	PREDICTED: uncharacterized protein LOC103421886 [Malus domestica]	00051(Fructose and mannose metabolism);00500(Starch and sucrose metabolism);00520(Amino sugar and nucleotide sugar metabolism)	K00847	EC:2.7.1.4	-	5.61688	11.8605	12.9328	1.92315	4.27347	6.90208
MD09G1256700	PREDICTED: protein PLASTID MOVEMENT IMPAIRED 15 [Malus domestica]	00970(Aminoacyl-tRNA biosynthesis)	K01873	EC:6.1.1.9	-	14.9026	53.7141	52.0099	5.11092	11.2194	10.3192
MD09G1257900	-	04626(Plant-pathogen interaction)	K05391	NA	-	3771.57	4065.12	3524.61	1161.62	567.554	1033.06
MD09G1259000	PREDICTED: transcriptional activator DEMETER-like [Malus domestica]	NA	NA	NA	-	4.73264	5.29278	4.86386	1.88128	2.60724	2.5445
MD09G1262800	probable fructokinase-4 [Malus domestica]	NA	NA	NA	K00847,ko00520,Amino sugar and nucleotide sugar metabolism;K00847,ko00051,Fructose and mannose metabolism;K00847,ko00500,Starch and sucrose metabolism	15.6595	10.2228	14.8294	6.44448	4.235	7.26119
MD09G1264700	glutathione S-transferase DHAR3, chloroplastic [Malus domestica]	01212(Fatty acid metabolism);00061(Fatty acid biosynthesis);00071(Fatty acid degradation);04146(Peroxisome)	K01897	EC:6.2.1.3	-	28.7022	11.0549	12.0046	10.3843	3.53789	6.71419
MD09G1267300	PREDICTED: potassium channel SKOR isoform X4 [Pyrus x bretschneideri]	NA	NA	NA	-	5.39394	5.85262	5.42048	2.18252	1.98269	3.06252
MD09G1270000	PREDICTED: aspartic proteinase PCS1-like [Pyrus x bretschneideri]	04075(Plant hormone signal transduction)	K14502	EC:2.7.11.1	-	3.56188	3.04513	3.42889	1.02818	0.0625821	0.0749323
MD09G1284400	PREDICTED: pentatricopeptide repeat-containing protein At2g31400, chloroplastic isoform X1 [Malus domestica]	NA	NA	NA	-	29.525	85.5844	87.1055	11.6249	24.7935	27.3432
MD09G1286100	PREDICTED: long chain acyl-CoA synthetase 1 isoform X2 [Pyrus x bretschneideri]	00230(Purine metabolism)	K00760	EC:2.4.2.8	K01897,ko00071,Fatty acid degradation;K01897,ko02024,Quorum sensing;K01897,ko00061,Fatty acid biosynthesis;K01897,ko01212,Fatty acid metabolism;K01897,ko04146,Peroxisome;K01897,ko03320,PPAR signaling pathway;K01897,ko04920,Adipocytokine signaling pathway	7.58078	5.69668	11.5659	1.56952	1.62151	2.54822
MD09G1286600	PREDICTED: nifU-like protein 1, chloroplastic [Pyrus x bretschneideri]	04144(Endocytosis);04145(Phagosome)	K07897	NA	-	14.3326	13.0934	12.26	4.88732	4.86909	5.701
MD09G1287200	PREDICTED: glycogen synthase kinase-3 homolog MsK-3 [Pyrus x bretschneideri]	01200(Carbon metabolism);00010(Glycolysis / Gluconeogenesis);00020(Citrate cycle (TCA cycle));00620(Pyruvate metabolism)	K00627	EC:2.3.1.12	-	29.5315	2.94727	2.72528	4.96543	0.281176	0.645275
MD09G1287900	PREDICTED: nitrogen regulatory protein P-II homolog [Malus domestica]	01200(Carbon metabolism);00010(Glycolysis / Gluconeogenesis);00020(Citrate cycle (TCA cycle));00620(Pyruvate metabolism)	K00627	EC:2.3.1.12	-	6.04532	8.56818	7.99474	1.51544	2.50364	5.41114
MD10G1037900	PREDICTED: hypoxanthine-guanine phosphoribosyltransferase [Malus domestica]	02010(ABC transporters)	K05681	NA	K00760,ko00230,Purine metabolism;K00760,ko00983,Drug metabolism - other enzymes	35.5483	14.5644	9.23906	11.3691	1.87962	4.37323
MD10G1038100	PREDICTED: uncharacterized protein LOC103400360 [Malus domestica]	NA	NA	NA	-	52.9107	12.318	10.5731	5.84835	1.1822	1.00521
MD10G1046900	PREDICTED: dihydrolipoyllysine-residue acetyltransferase component 5 of pyruvate dehydrogenase complex, chloroplastic-like [Malus domestica]	00910(Nitrogen metabolism)	K01673	EC:4.2.1.1	K00627,ko00010,Glycolysis / Gluconeogenesis;K00627,ko00020,Citrate cycle (TCA cycle);K00627,ko01200,Carbon metabolism;K00627,ko00620,Pyruvate metabolism	78.9397	96.2568	109.935	10.2305	13.3728	17.4042
MD10G1047200	PREDICTED: dihydrolipoyllysine-residue acetyltransferase component 5 of pyruvate dehydrogenase complex, chloroplastic [Malus domestica]	03040(Spliceosome)	K12869	NA	K00627,ko00010,Glycolysis / Gluconeogenesis;K00627,ko00020,Citrate cycle (TCA cycle);K00627,ko01200,Carbon metabolism;K00627,ko00620,Pyruvate metabolism	48.064	21.9805	25.3532	6.12678	2.8703	3.52962
MD10G1049900	PREDICTED: ABC transporter G family member 11-like [Malus domestica]	00040(Pentose and glucuronate interconversions);00051(Fructose and mannose metabolism);00052(Galactose metabolism);00561(Glycerolipid metabolism)	K00011	EC:1.1.1.21	-	480.958	631.053	695.679	197.947	60.5941	77.832
MD10G1052600	PREDICTED: dicarboxylate transporter 2, chloroplastic-like [Malus domestica]	NA	NA	NA	-	21.68	20.948	23.1904	7.21989	6.52046	8.98569
MD10G1054100	PREDICTED: beta carbonic anhydrase 5, chloroplastic-like isoform X1 [Malus domestica]	NA	NA	NA	K01673,ko00910,Nitrogen metabolism	76.6385	67.5789	72.4702	3.78747	1.32926	1.42834
MD10G1058100	PREDICTED: peptide methionine sulfoxide reductase B5-like [Pyrus x bretschneideri]	01230(Biosynthesis of amino acids);00053(Ascorbate and aldarate metabolism);00562(Inositol phosphate metabolism);00340(Histidine metabolism);04070(Phosphatidylinositol signaling system)	K18649	EC:3.1.3.25;EC:3.1.3.93	-	15.5296	4.06416	4.1729	3.67121	1.71017	1.36511
MD10G1062300	NADP-dependent D-sorbitol-6-phosphate dehydrogenase [Malus domestica]	NA	NA	NA	-	140.236	7.62404	6.57384	45.8532	1.91349	1.01827
MD10G1065100	PREDICTED: protein DETOXIFICATION 46, chloroplastic [Pyrus x bretschneideri]	NA	NA	NA	-	7.30365	2.08515	1.78628	0.871104	0.167983	0.150851
MD10G1067500	PREDICTED: WD repeat-containing protein 13-like isoform X1 [Malus domestica]	NA	NA	NA	-	4.1049	4.04158	3.90467	1.57789	0.868782	2.61464
MD10G1068900	PREDICTED: bifunctional phosphatase IMPL2, chloroplastic-like [Pyrus x bretschneideri]	00130(Ubiquinone and other terpenoid-quinone biosynthesis)	K03809	EC:1.6.5.2	-	4.89944	2.33646	2.95328	1.13562	0.772037	0.999855
MD10G1079800	PREDICTED: putative polyol transporter 1 [Malus domestica]	01212(Fatty acid metabolism);00061(Fatty acid biosynthesis);00071(Fatty acid degradation);04146(Peroxisome)	K01897	EC:6.2.1.3	-	33.7781	10.0589	4.58405	9.4049	3.26607	1.61525
MD10G1080000	PREDICTED: putative polyol transporter 1 [Malus domestica]	00941(Flavonoid biosynthesis)	K05278	EC:1.14.11.23	-	46.4444	4.02662	4.57285	6.08676	0.499622	0.754277
MD10G1080100	PREDICTED: polyol transporter 5-like isoform X2 [Malus domestica]	03410(Base excision repair)	K03575	EC:3.2.2.-	-	45.2895	1.59219	2.02792	13.2549	0.485233	0.303126
MD10G1081100	PREDICTED: probable NAD(P)H dehydrogenase (quinone) FQR1-like 1 [Malus domestica]	NA	NA	NA	-	2.49551	2.42133	2.85237	0.771394	0.897122	0.702339
MD10G1085400	PREDICTED: long chain acyl-CoA synthetase 2 [Malus domestica]	04075(Plant hormone signal transduction);04626(Plant-pathogen interaction)	K13416	EC:2.7.10.1;EC:2.7.11.1	K01897,ko00071,Fatty acid degradation;K01897,ko02024,Quorum sensing;K01897,ko00061,Fatty acid biosynthesis;K01897,ko01212,Fatty acid metabolism;K01897,ko04146,Peroxisome;K01897,ko03320,PPAR signaling pathway;K01897,ko04920,Adipocytokine signaling pathway	8.86003	15.185	24.4161	2.65657	4.02819	3.83191
MD10G1088100	PREDICTED: protein DMR6-LIKE OXYGENASE 2-like [Pyrus x bretschneideri]	NA	NA	NA	-	47.8247	92.5813	79.4672	15.7026	21.1547	17.8125
MD10G1091000	PREDICTED: probable carboxylesterase 7 [Malus domestica]	NA	NA	NA	-	14.5862	16.7547	17.8285	0.925326	0.605469	0.773285
MD10G1096700	PREDICTED: protein TIC 21, chloroplastic [Malus domestica]	01230(Biosynthesis of amino acids);00300(Lysine biosynthesis)	K10206	EC:2.6.1.83	-	29.4686	5.60758	6.64812	8.95562	2.33132	2.6053
MD10G1102700	PREDICTED: somatic embryogenesis receptor kinase 2-like [Malus domestica]	00330(Arginine and proline metabolism)	K01259	EC:3.4.11.5	-	67.4722	11.0209	11.6501	16.8602	2.14189	3.50284
MD10G1110200	PREDICTED: probable zinc metallopeptidase EGY3, chloroplastic [Pyrus x bretschneideri]	00270(Cysteine and methionine metabolism)	K01244	EC:3.2.2.16	-	4.69	6.30855	5.44589	0.782271	0.700684	1.70189
MD10G1111900	PREDICTED: uncharacterized protein LOC103928069 [Pyrus x bretschneideri]	NA	NA	NA	-	58.493	65.968	53.6982	11.1016	9.73584	11.8144
MD10G1114500	PREDICTED: LL-diaminopimelate aminotransferase, chloroplastic-like [Malus domestica]	00905(Brassinosteroid biosynthesis)	K09588	EC:1.14.-.-	K10206,ko00300,Lysine biosynthesis;K10206,ko01230,Biosynthesis of amino acids	122.557	52.756	46.0174	36.3291	17.9356	25.0192
MD10G1115000	PREDICTED: proline iminopeptidase [Malus domestica]	NA	NA	NA	K01259,ko00330,Arginine and proline metabolism	74.0752	60.0238	58.7742	19.8465	18.8372	24.3189
MD10G1116600	PREDICTED: 5'-methylthioadenosine/S-adenosylhomocysteine nucleosidase 2-like [Pyrus x bretschneideri]	NA	NA	NA	K01244,ko00270,Cysteine and methionine metabolism	73.9192	21.2826	24.2619	24.0716	9.18517	13.9726
MD10G1129200	PREDICTED: uncharacterized protein LOC103422104 [Malus domestica]	NA	NA	NA	-	77.5488	17.7759	14.4025	29.8615	8.46529	7.36262
MD10G1138400	PREDICTED: cytochrome P450 87A3-like [Malus domestica]	NA	NA	NA	-	29.5254	18.1533	23.2255	8.01366	6.50522	10.7918
MD10G1138900	PREDICTED: protein LAZ1-like isoform X1 [Malus domestica]	NA	NA	NA	-	8.5712	7.67474	6.00453	3.5374	2.23981	2.15624
MD10G1141500	PREDICTED: amino acid transporter ANTL1-like [Malus domestica]	NA	NA	NA	-	5.79487	4.72287	3.56255	1.5376	0.765607	0.875027
MD10G1142100	PREDICTED: monosaccharide-sensing protein 2-like [Malus domestica]	00920(Sulfur metabolism)	K05907	EC:1.8.4.9	-	100.473	59.7722	59.0971	14.8348	12.8149	26.0364
MD10G1144600	PREDICTED: uncharacterized protein LOC103445306 [Malus domestica]	04120(Ubiquitin mediated proteolysis)	K10686	EC:6.2.1.45	-	8.24548	5.37842	6.92191	2.20753	0.123095	0
MD10G1147100	PREDICTED: acyl-coenzyme A thioesterase 9, mitochondrial-like [Malus domestica]	00040(Pentose and glucuronate interconversions);00500(Starch and sucrose metabolism)	K01213	EC:3.2.1.67	-	21.2129	30.0572	36.22	0.711017	0.62608	0.860691
MD10G1159700	PREDICTED: uncharacterized protein LOC103927679 [Pyrus x bretschneideri]	NA	NA	NA	-	5.94494	1.64467	1.95686	1.92098	0.448561	0.784967
MD10G1172500	PREDICTED: monothiol glutaredoxin-S10-like isoform X1 [Malus domestica]	04144(Endocytosis)	K12192	NA	-	6.16237	2.87484	2.4382	1.16741	0.426138	0.923281
MD10G1179000	PREDICTED: rho GDP-dissociation inhibitor 1-like [Malus domestica]	00900(Terpenoid backbone biosynthesis)	K11778	EC:2.5.1.87	K12462,ko04722,Neurotrophin signaling pathway;K12462,ko04962,Vasopressin-regulated water reabsorption	17.8731	45.582	41.1603	7.31986	14.5514	19.5479
MD10G1179100	RecName: Full=Polygalacturonase; Short=PG; AltName: Full=Pectinase; Flags: Precursor [Malus domestica]	00500(Starch and sucrose metabolism);00520(Amino sugar and nucleotide sugar metabolism)	K13648	EC:2.4.1.43	-	180.194	288.777	195.598	8.59048	2.07009	0.634766
MD10G1179300	PREDICTED: uncharacterized protein LOC103445599 [Malus domestica]	00480(Glutathione metabolism)	K00799	EC:2.5.1.18	-	32.7263	41.8893	51.1253	8.1309	6.60218	13.9762
MD10G1180500	PREDICTED: vacuolar protein sorting-associated protein 2 homolog 3-like [Malus domestica]	04145(Phagosome)	K07374	NA	-	6.18999	13.4194	13.6663	2.50642	2.79524	4.35815
MD10G1185200	PREDICTED: uncharacterized protein LOC103445638 [Malus domestica]	NA	NA	NA	-	50.2847	9.28329	10.4971	18.5879	3.36657	3.96432
MD10G1192000	PREDICTED: probable galacturonosyltransferase 6 isoform X1 [Malus domestica]	00510(N-Glycan biosynthesis)	K07441	EC:2.4.1.141	-	3.52769	1.99185	3.02123	0.533259	0.0895463	0.11794
MD10G1197100	PREDICTED: probable glutathione S-transferase [Malus domestica]	NA	NA	NA	K00799,ko00982,Drug metabolism - cytochrome P450;K00799,ko01524,Platinum drug resistance;K00799,ko05204,Chemical carcinogenesis;K00799,ko00980,Metabolism of xenobiotics by cytochrome P450;K00799,ko00480,Glutathione metabolism	19.2627	41.8447	67.3145	6.05761	15.6455	19.4324
MD10G1198500	PREDICTED: uncharacterized protein LOC103445769 [Malus domestica]	04146(Peroxisome)	K13237	EC:1.3.1.34	-	65.2599	16.2092	7.98584	14.9248	1.31732	1.5142
MD10G1202000	PREDICTED: ribosome-binding ATPase YchF [Malus domestica]	00240(Pyrimidine metabolism)	K01937	EC:6.3.4.2	-	32.4329	17.9464	15.5718	5.67845	3.49663	3.74763
MD10G1202100	PREDICTED: auxin-responsive protein SAUR71 [Malus domestica]	03050(Proteasome)	K02726	EC:3.4.25.1	-	195.784	213.935	157.594	66.2076	24.7691	31.1102
MD10G1202900	PREDICTED: probable BOI-related E3 ubiquitin-protein ligase 3 [Malus domestica]	00562(Inositol phosphate metabolism);04070(Phosphatidylinositol signaling system)	K01092	EC:3.1.3.25	-	16.2069	7.54833	6.91171	4.98751	0.0684806	0.0409975
MD10G1209100	PREDICTED: peroxisomal 2,4-dienoyl-CoA reductase-like [Malus domestica]	04075(Plant hormone signal transduction)	K14508	NA	K13237,ko04146,Peroxisome	7.27969	8.39677	10.3277	2.08836	1.08606	2.11313
MD10G1221000	PREDICTED: CTP synthase [Malus domestica]	NA	NA	NA	K01937,ko00240,Pyrimidine metabolism	216.461	148.586	193.404	87.6408	67.6832	51.8207
MD10G1231800	PREDICTED: proteasome subunit alpha type-2-B [Malus domestica]	00960(Tropane, piperidine and pyridine alkaloid biosynthesis)	K08081	EC:1.1.1.206	K02726,ko03050,Proteasome	30.1319	10.0087	10.065	9.07622	4.05027	5.0954
MD10G1234100	PREDICTED: phosphatase IMPL1, chloroplastic-like [Pyrus x bretschneideri]	NA	NA	NA	K01092,ko00562,Inositol phosphate metabolism;K01092,ko04070,Phosphatidylinositol signaling system;K01092,ko00521,Streptomycin biosynthesis	11.6443	10.6235	10.0627	2.86246	3.59306	5.62835
MD10G1236800	PREDICTED: regulatory protein NPR3-like [Malus domestica]	01212(Fatty acid metabolism);00061(Fatty acid biosynthesis);00780(Biotin metabolism)	K09458	EC:2.3.1.179	K14508,ko04075,Plant hormone signal transduction	2.79376	2.43641	1.78732	0.729826	0.56842	0.553704
MD10G1238000	PREDICTED: haloacid dehalogenase-like hydrolase domain-containing protein At3g48420 isoform X1 [Malus domestica]	NA	NA	NA	-	8.32708	7.41633	7.93136	2.83005	2.47537	2.83088
MD10G1243100	PREDICTED: uncharacterized oxidoreductase C663.09c [Malus domestica]	NA	NA	NA	-	12.1674	7.88834	6.52374	4.74271	2.82434	4.15563
MD10G1259200	PREDICTED: uncharacterized protein LOC103419720 [Malus domestica]	NA	NA	NA	-	6.25162	7.70145	7.57965	2.22747	2.62845	4.07965
MD10G1264200	PREDICTED: 3-oxoacyl-[acyl-carrier-protein] synthase I, chloroplastic-like [Malus domestica]	NA	NA	NA	K09458,ko00780,Biotin metabolism;K09458,ko01212,Fatty acid metabolism;K09458,ko00061,Fatty acid biosynthesis	13.2947	3.07298	4.20274	3.74776	0.609535	1.10877
MD10G1265000	hypothetical protein CISIN_1g048001mg [Citrus sinensis]	NA	NA	NA	-	55.2911	40.1134	40.1358	23.4109	11.8314	12.9284
MD10G1265700	PREDICTED: probable purine permease 9 isoform X2 [Malus domestica]	NA	NA	NA	-	23.4019	25.9331	27.7413	5.91589	2.47193	4.54331
MD10G1275200	PREDICTED: sodium-dependent phosphate transporter 1-like [Malus domestica]	04120(Ubiquitin mediated proteolysis)	K10606	EC:2.3.2.27	-	3.18079	0.719739	1.31676	0.642539	0.152207	0.260349
MD10G1276400	PREDICTED: uncharacterized protein LOC103429701 [Malus domestica]	04144(Endocytosis)	K05747	NA	-	22.4391	86.6723	81.9324	8.84052	28.5687	48.3313
MD10G1277000	PREDICTED: uncharacterized protein LOC103429684 [Malus domestica]	01230(Biosynthesis of amino acids);00300(Lysine biosynthesis)	K01586	EC:4.1.1.20	-	45.7275	147.894	140.189	9.52813	51.4833	54.4554
MD10G1279800	PREDICTED: protein LIGHT-DEPENDENT SHORT HYPOCOTYLS 10-like [Malus domestica]	NA	NA	NA	-	16.989	17.5349	14.9574	6.97655	3.465	6.74498
MD10G1280400	PREDICTED: uncharacterized protein LOC103446323 isoform X1 [Malus domestica]	NA	NA	NA	-	10.9169	1.36934	1.40197	3.12445	0.265184	0.317517
MD10G1282700	PREDICTED: protein CHUP1, chloroplastic-like [Pyrus x bretschneideri]	NA	NA	NA	-	28.1978	59.0032	66.2882	1.34004	2.52812	22.8469
MD10G1289000	PREDICTED: triose phosphate/phosphate translocator, chloroplastic isoform X1 [Malus domestica]	00600(Sphingolipid metabolism)	K04712	EC:1.14.-.-	-	79.9578	45.521	38.8804	9.94536	4.06846	8.22975
MD10G1289300	PREDICTED: glycogen phosphorylase 1-like [Malus domestica]	00350(Tyrosine metabolism);00950(Isoquinoline alkaloid biosynthesis)	K00422	EC:1.10.3.1	-	8.91406	3.63651	3.75883	3.35107	1.46564	1.96871
MD10G1290700	PREDICTED: protein yippee-like At5g53940 [Malus domestica]	00350(Tyrosine metabolism);00950(Isoquinoline alkaloid biosynthesis)	K00422	EC:1.10.3.1	-	6.82619	10.1764	10.4119	2.35436	4.65297	5.45843
MD10G1294700	PREDICTED: clavaminate synthase-like protein At3g21360 [Malus domestica]	00350(Tyrosine metabolism);00950(Isoquinoline alkaloid biosynthesis)	K00422	EC:1.10.3.1	-	11.627	7.83166	8.93466	1.13776	0.2366	0.242822
MD10G1295900	PREDICTED: sphingolipid delta(4)-desaturase DES1-like [Malus domestica]	00561(Glycerolipid metabolism)	K01054	EC:3.1.1.23	-	5.09831	1.46228	1.32265	1.08826	0.325893	0.606988
MD10G1298200	PREDICTED: polyphenol oxidase, chloroplastic-like [Malus domestica]	NA	NA	NA	-	673.787	567.783	441.478	134.356	170.262	244.576
MD10G1298700	PREDICTED: polyphenol oxidase, chloroplastic-like [Malus domestica]	03015(mRNA surveillance pathway)	K08873	EC:2.7.11.1	K00422,ko00350,Tyrosine metabolism;K00422,ko00950,Isoquinoline alkaloid biosynthesis	90.543	17.4131	7.74436	0.988792	0.0243773	0
MD10G1299300	PREDICTED: polyphenol oxidase, chloroplastic-like [Malus domestica]	00190(Oxidative phosphorylation)	K03885	EC:1.6.99.3	K00422,ko00350,Tyrosine metabolism;K00422,ko00950,Isoquinoline alkaloid biosynthesis	144.663	29.0649	12.4542	0.732582	0.158452	0.0583761
MD10G1300100	PREDICTED: caffeoylshikimate esterase-like [Malus domestica]	00130(Ubiquinone and other terpenoid-quinone biosynthesis)	K03809	EC:1.6.5.2	K01054,ko00561,Glycerolipid metabolism;K01054,ko04723,Retrograde endocannabinoid signaling;K01054,ko04923,Regulation of lipolysis in adipocytes	20.8905	20.497	23.834	8.89916	8.83684	10.3468
MD10G1302100	PREDICTED: uncharacterized protein LOC103446471 [Malus domestica]	00909(Sesquiterpenoid and triterpenoid biosynthesis)	K14173	EC:4.2.3.46	-	2.88494	4.37353	7.07371	0.674828	0.515687	0.984591
MD10G1303200	PREDICTED: telomerase Cajal body protein 1 [Malus domestica]	00941(Flavonoid biosynthesis)	K08695	EC:1.3.1.77	-	6.21027	1.93	1.57139	2.41817	0.435937	1.09287
MD10G1303600	PREDICTED: external alternative NAD(P)H-ubiquinone oxidoreductase B2, mitochondrial [Malus domestica]	NA	NA	NA	-	11.6329	4.81469	4.8163	0.882855	0.112176	0.0671569
MD10G1309100	PREDICTED: NAD(P)H dehydrogenase (quinone) FQR1-like [Malus domestica]	00620(Pyruvate metabolism)	K01759	EC:4.4.1.5	-	19.1594	13.244	10.2255	3.81872	1.95065	4.07373
MD10G1311000	(E,E)-alpha-farnesene synthase [Malus domestica]	00051(Fructose and mannose metabolism)	K00895	EC:2.7.1.90	-	654.576	397.273	652.579	15.675	10.5192	59.0052
MD10G1311100	anthocyanidin reductase [Malus domestica]	00270(Cysteine and methionine metabolism)	K05933	EC:1.14.17.4	-	23.1916	7.22316	8.51028	4.81941	1.45632	1.66068
MD10G1314300	PREDICTED: uncharacterized protein LOC103948127 isoform X1 [Pyrus x bretschneideri]	NA	NA	NA	-	5.05033	2.14754	1.81894	1.80821	0.349836	0.533113
MD10G1322500	PREDICTED: putative lactoylglutathione lyase [Pyrus x bretschneideri]	04146(Peroxisome)	K11147	EC:1.1.-.-	K01759,ko00620,Pyruvate metabolism	8.69842	4.33108	4.2008	1.70962	0.765444	1.22983
MD10G1327400	PREDICTED: pyrophosphate--fructose 6-phosphate 1-phosphotransferase subunit beta [Pyrus x bretschneideri]	NA	NA	NA	-	71.2809	64.5519	79.5846	13.4209	9.18596	17.8459
MD10G1328100	RecName: Full=1-aminocyclopropane-1-carboxylate oxidase 1; Short=ACC oxidase 1; AltName: Full=Ethylene-forming enzyme; Short=EFE; AltName: Full=PAE12; AltName: Full=Protein AP4	03022(Basal transcription factors)	K03138	NA	-	11688.2	9671.83	9433.18	2832.73	546.459	893.343
MD10G1328600	PREDICTED: ubiquinol oxidase 4, chloroplastic/chromoplastic [Pyrus x bretschneideri]	NA	NA	NA	-	32.7728	15.1806	15.2858	10.6843	4.08356	5.68867
MD10G1329100	PREDICTED: tropinone reductase-like 3 [Malus domestica]	NA	NA	NA	K11147,ko04146,Peroxisome;K11147,ko00830,Retinol metabolism	58.8475	53.2581	52.5056	22.9452	10.6717	13.8403
MD10G1329800	PREDICTED: mitochondrial pyruvate carrier 4-like [Malus domestica]	NA	NA	NA	-	45.9098	16.0455	13.7695	13.5872	6.05932	8.33406
MD10G1331000	PREDICTED: transcription initiation factor IIF subunit alpha-like [Malus domestica]	NA	NA	NA	-	31.7716	122.253	129.823	10.4678	44.1227	69.279
MD10G1332700	malate transporter [Malus domestica]	NA	NA	NA	-	101.457	19.2432	15.5308	9.47247	3.2469	4.85958
MD10G1332900	PREDICTED: LOW QUALITY PROTEIN: tonoplast dicarboxylate transporter-like [Malus domestica]	00970(Aminoacyl-tRNA biosynthesis)	K04567	EC:6.1.1.6	-	82.9756	25.0774	21.2693	4.96491	4.37589	8.739
MD10G1333000	malate transporter [Malus domestica]	04146(Peroxisome)	K13354	NA	-	39.6301	9.57098	12.0617	3.34455	1.38452	2.13762
MD10G1341000	PREDICTED: uncharacterized protein At4g26485-like isoform X1 [Malus domestica]	NA	NA	NA	-	8.49353	24.5735	23.3431	2.55015	9.81716	13.0413
MD11G1001800	PREDICTED: uncharacterized protein LOC103446965 [Malus domestica]	01200(Carbon metabolism);00670(One carbon pool by folate)	K01938	EC:6.3.4.3	-	25.5458	28.125	28.1827	5.66115	9.00546	12.0173
MD11G1003100	PREDICTED: lysine--tRNA ligase, chloroplastic/mitochondrial-like [Malus domestica]	04626(Plant-pathogen interaction)	K13459	NA	K04567,ko00970,Aminoacyl-tRNA biosynthesis	3.32165	4.14903	4.63644	1.08958	1.35826	2.84284
MD11G1004900	PREDICTED: mitochondrial dicarboxylate/tricarboxylate transporter DTC-like [Malus domestica]	00500(Starch and sucrose metabolism);00460(Cyanoamino acid metabolism);00940(Phenylpropanoid biosynthesis)	K01188	EC:3.2.1.21	-	84.8101	17.3853	21.1085	31.9003	5.40504	9.86003
MD11G1012100	-	NA	NA	NA	-	3.11612	4.62745	4.73381	0.922064	0.909847	0.968356
MD11G1015100	PREDICTED: formate--tetrahydrofolate ligase [Pyrus x bretschneideri]	NA	NA	NA	-	7.55932	5.6675	5.68198	0.826113	0.0708982	0.297114
MD11G1020500	PREDICTED: probable disease resistance protein At4g27220 [Pyrus x bretschneideri]	NA	NA	NA	K13459,ko04626,Plant-pathogen interaction	4.66458	5.00973	4.75656	1.83573	0.83653	0.793588
MD11G1027500	PREDICTED: beta-glucosidase 12-like [Malus domestica]	NA	NA	NA	-	242.082	101.115	86.5547	6.85405	1.90376	1.68994
MD11G1027900	PREDICTED: uncharacterized protein LOC103429833 [Malus domestica]	04141(Protein processing in endoplasmic reticulum);04626(Plant-pathogen interaction)	K04079	NA	-	14.1034	12.0527	10.2084	3.32178	2.14066	1.94099
MD11G1029400	PREDICTED: zinc transporter ZTP29 [Pyrus x bretschneideri]	NA	NA	NA	-	8.64135	1.4822	1.27308	1.44547	0.315339	0.415327
MD11G1032600	PREDICTED: uncharacterized protein LOC103447176 [Malus domestica]	01212(Fatty acid metabolism);00061(Fatty acid biosynthesis)	K00645	NA	-	5.27499	9.2228	9.4483	1.68643	3.61184	4.88064
MD11G1036700	PREDICTED: E3 ubiquitin-protein ligase At1g63170 isoform X1 [Malus domestica]	NA	NA	NA	-	4.8428	1.58927	1.48224	1.56369	0.630827	0.828751
MD11G1037400	PREDICTED: heat shock protein 90-2 [Pyrus x bretschneideri]	00900(Terpenoid backbone biosynthesis)	K15892	EC:2.7.1.-	K04079,ko04626,Plant-pathogen interaction;K04079,ko04151,PI3K-Akt signaling pathway;K04079,ko04612,Antigen processing and presentation;K04079,ko04915,Estrogen signaling pathway;K04079,ko05215,Prostate cancer;K04079,ko04141,Protein processing in endoplasmic reticulum;K04079,ko04914,Progesterone-mediated oocyte maturation;K04079,ko04621,NOD-like receptor signaling pathway;K04079,ko05200,Pathways in…	154.667	419.625	433.179	39.0253	47.0489	77.5632
MD11G1054100	PREDICTED: non-specific lipid-transfer protein 1-like [Malus domestica]	04626(Plant-pathogen interaction)	K13414	EC:2.7.11.25	-	489.371	20.5358	19.2275	12.9836	0.184643	0.958019
MD11G1056800	PREDICTED: malonyl CoA-acyl carrier protein transacylase [Malus domestica]	00250(Alanine, aspartate and glutamate metabolism)	K01953	EC:6.3.5.4	K00645,ko01212,Fatty acid metabolism;K00645,ko00061,Fatty acid biosynthesis	108.456	100.086	109.57	13.0227	16.4843	25.1569
MD11G1060600	PREDICTED: protein NUCLEAR FUSION DEFECTIVE 4 [Malus domestica]	00562(Inositol phosphate metabolism);00564(Glycerophospholipid metabolism);00565(Ether lipid metabolism)	K01114	EC:3.1.4.3	-	2.07737	2.41363	1.50194	0.72252	0.0868064	0.0519686
MD11G1066300	PREDICTED: farnesol kinase, chloroplastic-like [Malus domestica]	04626(Plant-pathogen interaction)	K13459	NA	-	12.8868	5.32187	5.23511	4.89881	1.80962	2.06256
MD11G1070200	PREDICTED: mitogen-activated protein kinase kinase kinase A-like [Malus domestica]	NA	NA	NA	-	27.7469	21.8188	18.3076	1.20194	3.59687	5.14147
MD11G1070800	PREDICTED: asparagine synthetase [glutamine-hydrolyzing] 1 [Malus domestica]	04075(Plant hormone signal transduction)	K14494	NA	K01953,ko00250,Alanine, aspartate and glutamate metabolism	7.95582	3.41371	4.37349	1.87197	1.87682	1.43004
MD11G1075900	PREDICTED: non-specific phospholipase C1 [Malus domestica]	04144(Endocytosis)	K10396	NA	K01114,ko00562,Inositol phosphate metabolism;K01114,ko00564,Glycerophospholipid metabolism;K01114,ko04919,Thyroid hormone signaling pathway;K01114,ko02024,Quorum sensing;K01114,ko00565,Ether lipid metabolism	25.4575	15.6903	14.129	4.86659	3.93563	4.81645
MD11G1090100	PREDICTED: probable disease resistance protein At4g27220 [Malus domestica]	NA	NA	NA	-	6.85772	7.96023	8.64113	2.01288	2.23574	4.21107
MD11G1095200	PREDICTED: D-xylose-proton symporter-like 3, chloroplastic [Malus domestica]	00900(Terpenoid backbone biosynthesis)	K03526	EC:1.17.7.1;EC:1.17.7.3	-	250.617	52.8812	50.1552	103.923	22.7448	28.8587
MD11G1098100	PREDICTED: scarecrow-like protein 30 [Malus domestica]	NA	NA	NA	-	9.17121	9.01441	9.54878	2.97273	1.03871	1.61681
MD11G1118200	PREDICTED: kinesin-like protein KIN-5D [Malus domestica]	NA	NA	NA	-	9.45585	15.9501	17.3753	3.72378	6.49322	10.4709
MD11G1132500	PREDICTED: MLO-like protein 3 [Pyrus x bretschneideri]	04626(Plant-pathogen interaction)	K05391	NA	-	18.6293	4.8054	5.04044	6.08893	1.01339	0.536145
MD11G1135000	PREDICTED: 4-hydroxy-3-methylbut-2-en-1-yl diphosphate synthase (ferredoxin), chloroplastic [Malus domestica]	03010(Ribosome)	K02902	NA	K03526,ko00900,Terpenoid backbone biosynthesis	37.2474	79.4585	69.9459	11.1314	27.949	25.6729
MD11G1136500	PREDICTED: uncharacterized protein LOC103447887 [Malus domestica]	NA	NA	NA	-	51.339	31.6114	28.3395	14.1742	6.4835	8.91695
MD11G1137600	PREDICTED: protein ENHANCED DISEASE RESISTANCE 2 [Prunus mume]	04146(Peroxisome)	K04565	EC:1.15.1.1	-	18.1107	15.2138	12.7407	7.6296	3.96504	8.94278
MD11G1139100	PREDICTED: putative cyclic nucleotide-gated ion channel 15 [Malus domestica]	NA	NA	NA	K05391,ko04626,Plant-pathogen interaction	12.6073	8.86492	8.67272	4.6064	1.33431	1.67371
MD11G1143400	hypothetical protein CICLE_v10013313mg, partial [Citrus clementina]	00562(Inositol phosphate metabolism);00564(Glycerophospholipid metabolism);00565(Ether lipid metabolism)	K01114	EC:3.1.4.3	-	50.1995	112.021	121.07	18.337	40.8582	61.3466
MD11G1147500	PREDICTED: protein enabled homolog [Malus domestica]	03010(Ribosome)	K02986	NA	-	11.4183	12.5568	11.5241	4.72208	2.36455	4.31564
MD11G1148200	PREDICTED: superoxide dismutase [Cu-Zn], chloroplastic isoform X1 [Malus domestica]	NA	NA	NA	-	87.3396	68.4189	51.3109	29.4472	20.7625	21.4814
MD11G1149900	PREDICTED: uncharacterized protein LOC103422884 [Malus domestica]	00073(Cutin, suberine and wax biosynthesis);04146(Peroxisome)	K13356	EC:1.2.1.84	-	13.1878	27.5207	30.2223	5.06329	5.76947	7.16825
MD11G1153500	PREDICTED: magnesium transporter MRS2-11, chloroplastic-like [Malus domestica]	04141(Protein processing in endoplasmic reticulum);04120(Ubiquitin mediated proteolysis)	K06689	EC:2.3.2.23	-	27.3289	11.9691	11.0035	10.2372	4.94983	6.11784
MD11G1159600	PREDICTED: alkaline/neutral invertase E, chloroplastic-like [Malus domestica]	NA	NA	NA	-	19.3194	26.8253	23.6541	1.70406	1.78413	2.11697
MD11G1160800	PREDICTED: uncharacterized protein LOC103447971 [Malus domestica]	NA	NA	NA	-	14.4348	21.4218	23.8415	5.24	8.22315	11.0796
MD11G1161800	PREDICTED: fatty acyl-CoA reductase 3-like [Pyrus x bretschneideri]	00650(Butanoate metabolism);00072(Synthesis and degradation of ketone bodies);00280(Valine, leucine and isoleucine degradation);04146(Peroxisome)	K01640	EC:4.1.3.4	K13356,ko04146,Peroxisome;K13356,ko04212,Longevity regulating pathway - worm;K13356,ko00073,Cutin, suberine and wax biosynthesis	40.9355	24.7772	38.645	1.59849	0.583337	0.977837
MD11G1170800	PREDICTED: ubiquitin-conjugating enzyme E2 variant 1D-like [Malus domestica]	NA	NA	NA	-	16.676	8.2935	10.4088	6.1591	2.99243	2.39877
MD11G1174200	PREDICTED: outer envelope protein 80, chloroplastic [Pyrus x bretschneideri]	00500(Starch and sucrose metabolism)	K19891	EC:3.2.1.39	-	13.6582	4.8899	5.06786	5.11732	2.55782	2.48445
MD11G1179700	PREDICTED: non-specific lipid transfer protein GPI-anchored 2-like isoform X1 [Malus domestica]	02010(ABC transporters)	K05681	NA	-	35.676	5.89783	7.09165	12.4517	1.99522	1.33338
MD11G1183200	PREDICTED: F-box protein At2g26850-like isoform X1 [Malus domestica]	NA	NA	NA	-	13.4441	7.17589	6.55292	3.63837	2.06935	2.23102
MD11G1186100	PREDICTED: protein LATERAL ROOT PRIMORDIUM 1-like, partial [Malus domestica]	NA	NA	NA	-	1.47678	3.67502	4.11476	0.542885	0.498439	0.538293
MD11G1189000	PREDICTED: glucan endo-1,3-beta-glucosidase-like [Malus domestica]	NA	NA	NA	-	166.882	3.70646	5.552	11.4208	0.318915	0.381852
MD11G1189900	PREDICTED: ABC transporter G family member 15-like [Malus domestica]	03010(Ribosome)	K02946	NA	-	66.0953	41.1075	46.8035	6.34312	7.45025	8.25497
MD11G1193100	PREDICTED: uncharacterized protein LOC103407499 [Malus domestica]	02010(ABC transporters)	K05665	NA	-	6.72918	24.9768	13.6812	1.17239	0.135713	0.20312
MD11G1193500	PREDICTED: dicarboxylate transporter 1, chloroplastic-like [Pyrus x bretschneideri]	NA	NA	NA	-	25.5832	15.0972	17.4332	9.13534	2.65348	4.12128
MD11G1200400	PREDICTED: LOW QUALITY PROTEIN: nuclear transcription factor Y subunit B-3-like [Pyrus x bretschneideri]	NA	NA	NA	-	10.1922	116.208	133.352	3.47545	29.4381	48.5997
MD11G1202000	PREDICTED: 30S ribosomal protein S10, chloroplastic-like [Malus domestica]	00500(Starch and sucrose metabolism)	K19891	EC:3.2.1.39	K02946,ko03010,Ribosome	42.5636	11.2984	11.9309	14.6155	5.00917	5.49348
MD11G1203300	PREDICTED: ABC transporter C family member 3-like [Malus domestica]	NA	NA	NA	-	8.68461	5.45878	4.99977	3.393	1.75559	1.22992
MD11G1204000	PREDICTED: DUF21 domain-containing protein At1g55930, chloroplastic-like [Malus domestica]	04140(Regulation of autophagy)	K08341	NA	-	11.847	23.4896	22.3189	3.20424	7.7337	9.99941
MD11G1208400	PREDICTED: cell division protein FtsZ homolog 1, chloroplastic-like isoform X2 [Malus domestica]	NA	NA	NA	K03531,ko04112,Cell cycle - Caulobacter	8.1979	3.85418	4.00538	1.13077	0.664934	1.87539
MD11G1210800	PREDICTED: glucan endo-1,3-beta-glucosidase 7-like [Pyrus x bretschneideri]	NA	NA	NA	-	42.4133	31.3406	34.8799	5.03078	1.23284	0.98409
MD11G1212000	PREDICTED: prohibitin-1, mitochondrial-like [Malus domestica]	NA	NA	NA	-	15.8285	10.7361	13.0347	2.65933	2.6051	4.48257
MD11G1216100	PREDICTED: autophagy-related protein 8C isoform X1 [Nelumbo nucifera]	00500(Starch and sucrose metabolism);00460(Cyanoamino acid metabolism);00940(Phenylpropanoid biosynthesis)	K05350	EC:3.2.1.21	-	71.5507	50.1467	47.5618	30.0936	22.4412	26.3343
MD11G1216500	PREDICTED: uncharacterized protein LOC103430090 [Malus domestica]	NA	NA	NA	-	19.6989	17.7722	19.1747	6.61083	3.72363	5.90217
MD11G1218700	PREDICTED: E3 ubiquitin-protein ligase BRE1A-like [Malus domestica]	NA	NA	NA	-	39.8273	96.1626	83.0347	10.1746	26.6402	24.6558
MD11G1222300	PREDICTED: chloroplastic lipocalin-like [Pyrus x bretschneideri]	NA	NA	NA	-	20.4514	19.3639	16.6979	2.88	5.13895	8.15033
MD11G1223700	PREDICTED: glucose-6-phosphate/phosphate translocator 2, chloroplastic [Malus domestica]	NA	NA	NA	-	9.99034	2.02775	2.66714	1.41088	0.108105	0.431465
MD11G1225200	PREDICTED: trafficking protein particle complex subunit 3 [Malus domestica]	01230(Biosynthesis of amino acids);00270(Cysteine and methionine metabolism);00350(Tyrosine metabolism);00360(Phenylalanine metabolism);00400(Phenylalanine, tyrosine and tryptophan biosynthesis);00130(Ubiquinone and other terpenoid-quinone biosynthesis);00950(Isoquinoline alkaloid biosynthesis);00960(Tropane, piperidine and pyridine alkaloid biosynthesis)	K00815	EC:2.6.1.5	-	25.3306	8.62312	9.01729	4.11886	1.6821	3.30512
[truncated: 532 more rows]
