# Supplementary material for: The molecular mechanism on suppression of climacteric fruit ripening with postharvest wax coating treatment via transcriptome
Source: Front Plant Sci. 2022 Aug 15;13:978013. doi: 10.3389/fpls.2022.978013 (PMC9421051; doi:10.3389/fpls.2022.978013)
Supplement: Supplementary file 5 [file Table_5.XLSX]

## Sheet: summary
Transcriptome up- and down-regulation in 2020 after wax treatment
	2020 year-Pear
Up-regulation	1898
Down-regulation	1349
Total DEGs	3247
Log2FC>1,Log2FC<-1
PValue<0.05

## Sheet: 20-Up-DEGs-Pear
Gene id	Transcript id	GO	KEGG	KO_ENTRY	EC	Description	FPKM.Control-Pear	FPKM.Waxed-Pear	FC	Log2FC	PValue	qval
D8674_039319	gnl|WGS:SMOL|Pdr0g028340.1	NA	NA	NA	NA	hypothetical protein DVH24_016346 [Malus domestica]	5.81923	621.509	106.803	6.7388	6.0152e-16	1.43464e-12
D8674_001381	gnl|WGS:SMOL|Pdr1g013810.1	GO:0051213(dioxygenase activity)	00941(Flavonoid biosynthesis)	K05278	EC:1.14.20.6	PREDICTED: protein DMR6-LIKE OXYGENASE 1-like [Pyrus x bretschneideri]	2.7184	104.206	38.3335	5.26053	1.08742e-11	7.07462e-09
D8674_008187	gnl|WGS:SMOL|Pdr12g008950.1	NA	NA	NA	NA	metallothionein-like protein [Pyrus pyrifolia]	2.03933	59.2743	29.0655	4.86124	2.09002e-10	8.04742e-08
D8674_039720	gnl|WGS:SMOL|Pdr0g032350.1	GO:0000398(mRNA splicing, via spliceosome);GO:0004004(ATP-dependent RNA helicase activity);GO:0005681(spliceosomal complex);GO:0006406(mRNA export from nucleus);GO:0006974(cellular response to DNA damage stimulus);GO:0010468(regulation of gene expression);GO:0010501(RNA secondary structure unwinding)	03040(Spliceosome);03013(RNA transport);03015(mRNA surveillance pathway)	K12812	EC:3.6.4.13	DEAD-box ATP-dependent RNA helicase 56-like [Prunus yedoensis var. nudiflora]	0.676031	17.4406	25.7985	4.68921	5.53891e-10	1.77123e-07
D8674_007088	gnl|WGS:SMOL|Pdr11g023490.1	GO:0016165(linoleate 13S-lipoxygenase activity)	00591(Linoleic acid metabolism);00592(alpha-Linolenic acid metabolism)	K00454	EC:1.13.11.12	PREDICTED: linoleate 13S-lipoxygenase 2-1, chloroplastic-like [Pyrus x bretschneideri]	0.366237	9.34046	25.5039	4.67264	6.98707e-10	2.16107e-07
D8674_029615	gnl|WGS:SMOL|Pdr6g014230.1	GO:0004712(protein serine/threonine/tyrosine kinase activity);GO:0004713(protein tyrosine kinase activity);GO:0005524(ATP binding);GO:0005829(cytosol);GO:0005886(plasma membrane);GO:0016301(kinase activity)	NA	NA	NA	PREDICTED: serine/threonine-protein kinase HT1-like [Malus domestica]	0.880773	21.3409	24.2297	4.5987	7.93703e-10	2.41529e-07
D8674_033916	gnl|WGS:SMOL|Pdr8g014620.1	GO:0005886(plasma membrane);GO:0015171(amino acid transmembrane transporter activity);GO:0032973(amino acid export across plasma membrane);GO:0043090(amino acid import);GO:0080144(amino acid homeostasis)	NA	NA	NA	PREDICTED: WAT1-related protein At1g21890-like [Pyrus x bretschneideri]	15.8251	358.953	22.6825	4.50351	8.89207e-10	2.66296e-07
D8674_035160	gnl|WGS:SMOL|Pdr9g006190.1	GO:0003674(molecular_function);GO:0009507(chloroplast);GO:0009534(chloroplast thylakoid);GO:0009535(chloroplast thylakoid membrane);GO:0009538(photosystem I reaction center);GO:0009579(thylakoid);GO:0009735(response to cytokinin);GO:0010287(plastoglobule);GO:0015979(photosynthesis);GO:0016020(membrane);GO:0016021(integral component of membrane)	00195(Photosynthesis)	K02695	NA	PREDICTED: photosystem I reaction center subunit VI-2, chloroplastic [Pyrus x bretschneideri]	4.30518	98.9874	22.9927	4.5231	9.69316e-10	2.81355e-07
D8674_028254	gnl|WGS:SMOL|Pdr6g000620.1	GO:0004365(glyceraldehyde-3-phosphate dehydrogenase (NAD+) (phosphorylating) activity);GO:0005829(cytosol);GO:0006006(glucose metabolic process);GO:0006096(glycolytic process);GO:0009409(response to cold);GO:0009416(response to light stimulus);GO:0009507(chloroplast);GO:0009535(chloroplast thylakoid membrane);GO:0009570(chloroplast stroma);GO:0009744(response to sucrose);GO:0009941(chloroplast en…	00710(Carbon fixation in photosynthetic organisms)	K05298	EC:1.2.1.13	glyceraldehyde-3-phosphate dehydrogenase B, chloroplastic [Pyrus x bretschneideri]	1.50012	30.1386	20.0908	4.32846	3.59582e-09	9.16789e-07
D8674_026037	gnl|WGS:SMOL|Pdr5g005130.1	GO:0005737(cytoplasm);GO:0005829(cytosol);GO:0016491(oxidoreductase activity);GO:0046686(response to cadmium ion);GO:0055114(oxidation-reduction process)	NA	NA	NA	PREDICTED: NADP-dependent D-sorbitol-6-phosphate dehydrogenase-like [Pyrus x bretschneideri]	2.86938	56.899	19.8297	4.30959	4.1631e-09	1.01899e-06
D8674_028399	gnl|WGS:SMOL|Pdr6g002070.1	GO:0000166(nucleotide binding);GO:0005515(protein binding);GO:0005524(ATP binding);GO:0005886(plasma membrane);GO:0006952(defense response);GO:0007165(signal transduction);GO:0009626(plant-type hypersensitive response);GO:0012505(endomembrane system);GO:0019897(extrinsic component of plasma membrane);GO:0043531(ADP binding)	04626(Plant-pathogen interaction)	K13457	NA	PREDICTED: disease resistance protein RPM1-like [Pyrus x bretschneideri]	3.74464	71.3403	19.0513	4.25182	4.74372e-09	1.12033e-06
D8674_014142	gnl|WGS:SMOL|Pdr15g014340.1	GO:0030599(pectinesterase activity);GO:0046910(pectinesterase inhibitor activity);GO:0071944(cell periphery)	00040(Pentose and glucuronate interconversions)	K01051	EC:3.1.1.11	PREDICTED: pectinesterase/pectinesterase inhibitor PPE8B [Pyrus x bretschneideri]	3.20696	58.1788	18.1414	4.18122	7.87739e-09	1.68889e-06
D8674_039695	gnl|WGS:SMOL|Pdr0g032100.1	GO:0003674(molecular_function);GO:0005634(nucleus);GO:0005829(cytosol);GO:0019005(SCF ubiquitin ligase complex);GO:0030162(regulation of proteolysis);GO:0031625(ubiquitin protein ligase binding);GO:0043161(proteasome-mediated ubiquitin-dependent protein catabolic process);GO:0080037(negative regulation of cytokinin-activated signaling pathway);GO:2000762(regulation of phenylpropanoid metabolic pr…	NA	NA	NA	PREDICTED: F-box/kelch-repeat protein At1g15670 [Pyrus x bretschneideri]	4.33771	78.0006	17.982	4.16848	9.07776e-09	1.92438e-06
D8674_028699	gnl|WGS:SMOL|Pdr6g005070.1	GO:0005887(integral component of plasma membrane);GO:0009705(plant-type vacuole membrane);GO:0009992(cellular water homeostasis);GO:0015250(water channel activity);GO:0015254(glycerol channel activity);GO:0034220(ion transmembrane transport);GO:0042807(central vacuole)	NA	NA	NA	PREDICTED: probable aquaporin TIP-type [Pyrus x bretschneideri]	1.27934	23.6533	18.4886	4.20857	1.22727e-08	2.51683e-06
D8674_019505	gnl|WGS:SMOL|Pdr17g014350.1	GO:0005737(cytoplasm);GO:0005829(cytosol);GO:0008150(biological_process)	NA	NA	NA	PREDICTED: protein TSS-like [Pyrus x bretschneideri]	0.265016	4.81868	18.1826	4.18449	1.33329e-08	2.67608e-06
D8674_005473	gnl|WGS:SMOL|Pdr11g007340.1	GO:0009416(response to light stimulus);GO:0009535(chloroplast thylakoid membrane);GO:0009768(photosynthesis, light harvesting in photosystem I);GO:0009941(chloroplast envelope);GO:0010287(plastoglobule);GO:0016168(chlorophyll binding);GO:0031409(pigment binding)	00196(Photosynthesis - antenna proteins)	K08914	NA	BnaA10g07350D [Brassica napus]	1.97123	34.904	17.7067	4.14622	1.733e-08	3.40589e-06
D8674_028451	gnl|WGS:SMOL|Pdr6g002590.1	GO:0004375(glycine dehydrogenase (decarboxylating) activity);GO:0005739(mitochondrion);GO:0005960(glycine cleavage complex);GO:0006546(glycine catabolic process);GO:0009507(chloroplast);GO:0019464(glycine decarboxylation via glycine cleavage system)	00630(Glyoxylate and dicarboxylate metabolism);00260(Glycine, serine and threonine metabolism)	K02437	NA	PREDICTED: glycine cleavage system H protein 3, mitochondrial-like [Pyrus x bretschneideri]	4.72061	75.199	15.9299	3.99367	2.90903e-08	5.48847e-06
D8674_018201	gnl|WGS:SMOL|Pdr17g001310.1	GO:0004034(aldose 1-epimerase activity);GO:0005634(nucleus);GO:0005975(carbohydrate metabolic process);GO:0006012(galactose metabolic process);GO:0047938(glucose-6-phosphate 1-epimerase activity)	00010(Glycolysis / Gluconeogenesis)	K01792	EC:5.1.3.15	PREDICTED: putative glucose-6-phosphate 1-epimerase [Pyrus x bretschneideri]	1.42044	23.5396	16.572	4.05068	2.97967e-08	5.56609e-06
D8674_024527	gnl|WGS:SMOL|Pdr4g011000.1	NA	NA	NA	NA	PREDICTED: uncharacterized protein LOC108173326 [Malus domestica]	8.21557	128.085	15.5905	3.96259	3.12328e-08	5.77714e-06
D8674_028280	gnl|WGS:SMOL|Pdr6g000880.1	GO:0003674(molecular_function);GO:0008150(biological_process)	00195(Photosynthesis)	K02704	NA	PREDICTED: transport and Golgi organization 2 homolog [Pyrus x bretschneideri]	5.56904	84.4516	15.1645	3.92262	3.57059e-08	6.38215e-06
D8674_042724	gnl|WGS:SMOL|Pdr0g062390.1	GO:0000981(RNA polymerase II transcription factor activity, sequence-specific DNA binding);GO:0003677(DNA binding);GO:0003700(DNA binding transcription factor activity);GO:0005515(protein binding);GO:0005634(nucleus);GO:0006351(transcription, DNA-templated);GO:0006355(regulation of transcription, DNA-templated);GO:0042802(identical protein binding);GO:0043565(sequence-specific DNA binding)	NA	NA	NA	PREDICTED: trihelix transcription factor GT-1 isoform X2 [Pyrus x bretschneideri]	0.441565	7.44018	16.8496	4.07464	3.58567e-08	6.38215e-06
D8674_002427	gnl|WGS:SMOL|Pdr10g005810.1	GO:0009416(response to light stimulus);GO:0009535(chloroplast thylakoid membrane);GO:0009768(photosynthesis, light harvesting in photosystem I);GO:0009941(chloroplast envelope);GO:0010287(plastoglobule);GO:0016168(chlorophyll binding);GO:0031409(pigment binding)	00196(Photosynthesis - antenna proteins)	K08912	NA	PREDICTED: chlorophyll a-b binding protein of LHCII type 1-like [Malus domestica]	0.890064	14.0383	15.7722	3.97931	4.56633e-08	7.69223e-06
D8674_023898	gnl|WGS:SMOL|Pdr4g004710.1	GO:0009409(response to cold);GO:0016021(integral component of membrane)	NA	NA	NA	PREDICTED: hydrophobic protein RCI2B [Pyrus x bretschneideri]	26.6281	397.859	14.9414	3.90124	4.92509e-08	8.15102e-06
D8674_035437	gnl|WGS:SMOL|Pdr9g008960.1	GO:0003674(molecular_function);GO:0005634(nucleus);GO:0009733(response to auxin)	00510(N-Glycan biosynthesis)	K07441	EC:2.4.1.141	PREDICTED: uncharacterized protein LOC103930694 [Pyrus x bretschneideri]	10.9609	160.178	14.6136	3.86924	5.44278e-08	8.92947e-06
D8674_027325	gnl|WGS:SMOL|Pdr5g018010.1	GO:0003674(molecular_function);GO:0009507(chloroplast);GO:0009523(photosystem II);GO:0009535(chloroplast thylakoid membrane);GO:0015979(photosynthesis);GO:0016021(integral component of membrane);GO:0042549(photosystem II stabilization)	00195(Photosynthesis)	K02721	NA	PREDICTED: photosystem II reaction center W protein, chloroplastic-like [Malus domestica]	2.18078	32.8414	15.0595	3.9126	6.29861e-08	9.98621e-06
D8674_013640	gnl|WGS:SMOL|Pdr15g009320.1	GO:0005737(cytoplasm);GO:0009733(response to auxin);GO:0016874(ligase activity)	04075(Plant hormone signal transduction)	K14487	NA	PREDICTED: probable indole-3-acetic acid-amido synthetase GH3.1 [Pyrus x bretschneideri]	0.741148	11.2196	15.1381	3.92011	6.45076e-08	1.00584e-05
D8674_011322	gnl|WGS:SMOL|Pdr14g005590.1	GO:0001046(core promoter sequence-specific DNA binding);GO:0001228(transcriptional activator activity, RNA polymerase II transcription regulatory region sequence-specific DNA binding);GO:0005634(nucleus);GO:0006366(transcription by RNA polymerase II)	NA	NA	NA	PREDICTED: transcription factor bHLH130-like [Pyrus x bretschneideri]	1.3417	19.3701	14.4369	3.85169	7.70088e-08	1.16234e-05
D8674_015398	gnl|WGS:SMOL|Pdr15g026900.1	GO:0003676(nucleic acid binding);GO:0003677(DNA binding);GO:0003700(DNA binding transcription factor activity);GO:0005634(nucleus);GO:0005886(plasma membrane);GO:0006355(regulation of transcription, DNA-templated);GO:0006979(response to oxidative stress);GO:0046872(metal ion binding)	NA	NA	NA	PREDICTED: zinc finger CCCH domain-containing protein 23-like [Pyrus x bretschneideri]	24.4884	336.039	13.7224	3.77846	8.57584e-08	1.25427e-05
D8674_041280	gnl|WGS:SMOL|Pdr0g047950.1	GO:0005634(nucleus);GO:0008150(biological_process)	NA	NA	NA	hypothetical protein DVH24_036517 [Malus domestica]	2.01143	28.8048	14.3206	3.84002	1.02193e-07	1.47182e-05
D8674_025731	gnl|WGS:SMOL|Pdr5g002070.1	GO:0005634(nucleus);GO:0005737(cytoplasm);GO:0005829(cytosol);GO:0005983(starch catabolic process);GO:0005986(sucrose biosynthetic process);GO:0006000(fructose metabolic process);GO:0006002(fructose 6-phosphate metabolic process);GO:0006094(gluconeogenesis);GO:0009737(response to abscisic acid);GO:0009750(response to fructose);GO:0015979(photosynthesis);GO:0016311(dephosphorylation);GO:0030388(fr…	00010(Glycolysis / Gluconeogenesis);00030(Pentose phosphate pathway);00051(Fructose and mannose metabolism);00710(Carbon fixation in photosynthetic organisms)	K03841	EC:3.1.3.11	PREDICTED: fructose-1,6-bisphosphatase, cytosolic isoform X1 [Pyrus x bretschneideri]	1.03035	14.6849	14.2524	3.83313	1.07004e-07	1.52264e-05
D8674_033192	gnl|WGS:SMOL|Pdr8g007380.1	GO:0005249(voltage-gated potassium channel activity);GO:0005887(integral component of plasma membrane);GO:0042391(regulation of membrane potential)	NA	NA	NA	PREDICTED: potassium channel AKT2/3 isoform X1 [Pyrus x bretschneideri]	0.401053	5.65638	14.1038	3.81802	1.07336e-07	1.52264e-05
D8674_001293	gnl|WGS:SMOL|Pdr1g012930.1	GO:0051213(dioxygenase activity)	00941(Flavonoid biosynthesis)	K05278	EC:1.14.20.6	PREDICTED: protein SRG1 [Pyrus x bretschneideri]	4.28866	57.6455	13.4414	3.74861	1.1799e-07	1.64898e-05
D8674_003323	gnl|WGS:SMOL|Pdr10g014770.1	GO:0046577(long-chain-alcohol oxidase activity)	NA	NA	NA	PREDICTED: long-chain-alcohol oxidase FAO2-like [Pyrus x bretschneideri]	0.536796	7.37385	13.7368	3.77997	1.63711e-07	2.22211e-05
D8674_007673	gnl|WGS:SMOL|Pdr12g003810.1	GO:0004040(amidase activity);GO:0005654(nucleoplasm);GO:0005737(cytoplasm);GO:0005829(cytosol);GO:0009684(indoleacetic acid biosynthetic process);GO:0009851(auxin biosynthetic process);GO:0016810(hydrolase activity, acting on carbon-nitrogen (but not peptide) bonds);GO:0043864(indoleacetamide hydrolase activity)	00330(Arginine and proline metabolism);00360(Phenylalanine metabolism);00380(Tryptophan metabolism)	K01426	EC:3.5.1.4	hypothetical protein DVH24_036643 [Malus domestica]	2.05488	26.8443	13.0637	3.70749	1.89902e-07	2.48811e-05
D8674_014613	gnl|WGS:SMOL|Pdr15g019050.1	GO:0004672(protein kinase activity);GO:0005524(ATP binding);GO:0005739(mitochondrion);GO:0006468(protein phosphorylation)	NA	NA	NA	PREDICTED: pentatricopeptide repeat-containing protein At5g21222-like isoform X1 [Pyrus x bretschneideri]	3.32731	40.0035	12.0228	3.5877	3.05079e-07	3.78679e-05
D8674_006509	gnl|WGS:SMOL|Pdr11g017700.1	GO:0004674(protein serine/threonine kinase activity);GO:0005634(nucleus);GO:0005737(cytoplasm);GO:0005886(plasma membrane);GO:0035556(intracellular signal transduction)	NA	NA	NA	PREDICTED: phototropin-1 isoform X2 [Pyrus x bretschneideri]	1.52995	18.2023	11.8973	3.57256	3.52466e-07	4.34638e-05
D8674_001283	gnl|WGS:SMOL|Pdr1g012830.1	GO:0003677(DNA binding);GO:0003700(DNA binding transcription factor activity);GO:0005634(nucleus);GO:0006351(transcription, DNA-templated);GO:0006355(regulation of transcription, DNA-templated);GO:0046983(protein dimerization activity)	NA	NA	NA	PREDICTED: transcription factor bHLH51-like [Pyrus x bretschneideri]	4.27904	49.9749	11.679	3.54585	4.31316e-07	5.21644e-05
D8674_019054	gnl|WGS:SMOL|Pdr17g009840.1	GO:0003674(molecular_function);GO:0005739(mitochondrion);GO:0008150(biological_process)	NA	NA	NA	hypothetical protein DVH24_027729 [Malus domestica]	1.05052	12.7775	12.1631	3.60443	4.91221e-07	5.79241e-05
D8674_018850	gnl|WGS:SMOL|Pdr17g007800.1	GO:0009813(flavonoid biosynthetic process);GO:0043231(intracellular membrane-bounded organelle);GO:0052696(flavonoid glucuronidation);GO:0080043(quercetin 3-O-glucosyltransferase activity);GO:0080044(quercetin 7-O-glucosyltransferase activity)	NA	NA	NA	PREDICTED: UDP-glycosyltransferase 71A16-like [Pyrus x bretschneideri]	0.630047	7.61511	12.0866	3.59533	5.13643e-07	5.95147e-05
D8674_000108	gnl|WGS:SMOL|Pdr1g001080.1	GO:0005516(calmodulin binding);GO:0009507(chloroplast);GO:0009522(photosystem I);GO:0009534(chloroplast thylakoid);GO:0009535(chloroplast thylakoid membrane);GO:0009543(chloroplast thylakoid lumen);GO:0009579(thylakoid);GO:0009773(photosynthetic electron transport in photosystem I);GO:0015979(photosynthesis);GO:0030093(chloroplast photosystem I)	00195(Photosynthesis)	K02701	NA	PREDICTED: photosystem I reaction center subunit N, chloroplastic-like [Pyrus x bretschneideri]	5.98732	67.6025	11.2909	3.49709	5.46612e-07	6.25026e-05
D8674_001773	gnl|WGS:SMOL|Pdr1g017730.1	GO:0002229(defense response to oomycetes);GO:0004674(protein serine/threonine kinase activity);GO:0005524(ATP binding);GO:0005886(plasma membrane);GO:0006468(protein phosphorylation);GO:0016021(integral component of membrane);GO:0016301(kinase activity);GO:0030246(carbohydrate binding)	NA	NA	NA	PREDICTED: L-type lectin-domain containing receptor kinase VIII.2-like [Pyrus x bretschneideri]	2.83664	31.6276	11.1496	3.47893	5.80386e-07	6.54941e-05
D8674_010325	gnl|WGS:SMOL|Pdr13g010050.1	GO:0003674(molecular_function);GO:0005634(nucleus);GO:0008150(biological_process)	04712(Circadian rhythm - plant)	K12129	NA	hypothetical protein DVH24_002088 [Malus domestica]	0.775794	8.93383	11.5157	3.52553	5.93967e-07	6.63099e-05
D8674_017916	gnl|WGS:SMOL|Pdr16g023210.1	GO:0004365(glyceraldehyde-3-phosphate dehydrogenase (NAD+) (phosphorylating) activity);GO:0005829(cytosol);GO:0006006(glucose metabolic process);GO:0006096(glycolytic process);GO:0009409(response to cold);GO:0009416(response to light stimulus);GO:0009507(chloroplast);GO:0009535(chloroplast thylakoid membrane);GO:0009570(chloroplast stroma);GO:0009744(response to sucrose);GO:0009941(chloroplast en…	00710(Carbon fixation in photosynthetic organisms)	K05298	EC:1.2.1.13	PREDICTED: glyceraldehyde-3-phosphate dehydrogenase B, chloroplastic-like [Pyrus x bretschneideri]	4.27708	47.6652	11.1443	3.47824	6.36554e-07	7.02331e-05
D8674_013517	gnl|WGS:SMOL|Pdr15g008090.1	GO:0004553(hydrolase activity, hydrolyzing O-glycosyl compounds);GO:0005576(extracellular region);GO:0005618(cell wall);GO:0009414(response to water deprivation);GO:0010411(xyloglucan metabolic process);GO:0016762(xyloglucan:xyloglucosyl transferase activity);GO:0016798(hydrolase activity, acting on glycosyl bonds);GO:0042546(cell wall biogenesis);GO:0048046(apoplast);GO:0071555(cell wall organiz…	NA	NA	NA	PREDICTED: probable xyloglucan endotransglucosylase/hydrolase protein 6 [Pyrus x bretschneideri]	0.968991	11.3698	11.7336	3.55258	6.57187e-07	7.20881e-05
D8674_041735	gnl|WGS:SMOL|Pdr0g052500.1	GO:0005515(protein binding)	00630(Glyoxylate and dicarboxylate metabolism);00710(Carbon fixation in photosynthetic organisms)	K01602	EC:4.1.1.39	PREDICTED: ribulose bisphosphate carboxylase small chain, chloroplastic [Pyrus x bretschneideri]	12.1021	133.149	11.0021	3.45971	6.74564e-07	7.35665e-05
D8674_032726	gnl|WGS:SMOL|Pdr8g002720.1	GO:0005770(late endosome);GO:0005886(plasma membrane);GO:0009416(response to light stimulus);GO:0009908(flower development);GO:0009911(positive regulation of flower development);GO:0010229(inflorescence development);GO:0010540(basipetal auxin transport);GO:0016567(protein ubiquitination);GO:0045176(apical protein localization);GO:0048825(cotyledon development);GO:0048827(phyllome development);GO:…	NA	NA	NA	PREDICTED: BTB/POZ domain-containing protein NPY1-like [Pyrus x bretschneideri]	0.436343	5.04066	11.5521	3.53008	6.90969e-07	7.44944e-05
D8674_028054	gnl|WGS:SMOL|Pdr5g025300.1	GO:0000103(sulfate assimilation);GO:0005829(cytosol);GO:0005886(plasma membrane);GO:0006457(protein folding);GO:0015035(protein disulfide oxidoreductase activity);GO:0016671(oxidoreductase activity, acting on a sulfur group of donors, disulfide as acceptor);GO:0034599(cellular response to oxidative stress);GO:0045454(cell redox homeostasis);GO:0055114(oxidation-reduction process)	NA	NA	NA	PREDICTED: thioredoxin-like protein CXXS1 [Pyrus x bretschneideri]	10.9909	119.865	10.9058	3.44703	7.02849e-07	7.53446e-05
D8674_026052	gnl|WGS:SMOL|Pdr5g005280.1	GO:0004332(fructose-bisphosphate aldolase activity);GO:0006094(gluconeogenesis);GO:0006096(glycolytic process);GO:0006098(pentose-phosphate shunt);GO:0009507(chloroplast);GO:0009570(chloroplast stroma);GO:0009579(thylakoid);GO:0009737(response to abscisic acid);GO:0009941(chloroplast envelope);GO:0010287(plastoglobule);GO:0016020(membrane);GO:0046686(response to cadmium ion);GO:0048046(apoplast)	00010(Glycolysis / Gluconeogenesis);00030(Pentose phosphate pathway);00051(Fructose and mannose metabolism);00710(Carbon fixation in photosynthetic organisms)	K01623	EC:4.1.2.13	PREDICTED: fructose-bisphosphate aldolase 1, chloroplastic-like [Pyrus x bretschneideri]	4.75117	51.7873	10.8999	3.44625	7.11534e-07	7.58447e-05
D8674_027759	gnl|WGS:SMOL|Pdr5g022350.1	GO:0009416(response to light stimulus);GO:0009535(chloroplast thylakoid membrane);GO:0009768(photosynthesis, light harvesting in photosystem I);GO:0009941(chloroplast envelope);GO:0010287(plastoglobule);GO:0016168(chlorophyll binding);GO:0031409(pigment binding)	00196(Photosynthesis - antenna proteins)	K08912	NA	PREDICTED: chlorophyll a-b binding protein of LHCII type 1 [Malus domestica]	3.59126	39.4688	10.9902	3.45815	7.41524e-07	7.81583e-05
D8674_022404	gnl|WGS:SMOL|Pdr3g012040.1	GO:0009416(response to light stimulus);GO:0009535(chloroplast thylakoid membrane);GO:0009768(photosynthesis, light harvesting in photosystem I);GO:0009941(chloroplast envelope);GO:0010287(plastoglobule);GO:0016168(chlorophyll binding);GO:0031409(pigment binding)	00196(Photosynthesis - antenna proteins)	K08914	NA	PREDICTED: chlorophyll a-b binding protein 13, chloroplastic [Malus domestica]	3.10704	33.2925	10.7152	3.42158	9.38968e-07	9.68061e-05
D8674_034192	gnl|WGS:SMOL|Pdr8g017380.1	GO:0051213(dioxygenase activity)	00904(Diterpenoid biosynthesis)	K05282	EC:1.14.11.12	PREDICTED: 2-oxoglutarate-dependent dioxygenase AOP3-like [Pyrus x bretschneideri]	4.78625	50.2816	10.5054	3.39306	1.03467e-06	0.000104953
D8674_030285	gnl|WGS:SMOL|Pdr7g002090.1	GO:0003674(molecular_function);GO:0005634(nucleus);GO:0006351(transcription, DNA-templated);GO:0006355(regulation of transcription, DNA-templated);GO:0007623(circadian rhythm)	NA	NA	NA	PREDICTED: protein LNK3-like [Pyrus x bretschneideri]	1.24752	13.2678	10.6354	3.4108	1.06535e-06	0.000107487
D8674_036727	gnl|WGS:SMOL|Pdr0g002420.1	GO:0004252(serine-type endopeptidase activity);GO:0006465(signal peptide processing);GO:0006627(protein processing involved in protein targeting to mitochondrion);GO:0009535(chloroplast thylakoid membrane);GO:0010027(thylakoid membrane organization);GO:0033108(mitochondrial respiratory chain complex assembly);GO:0042720(mitochondrial inner membrane peptidase complex)	03060(Protein export)	K03100	EC:3.4.21.89	hypothetical protein DVH24_029256 [Malus domestica]	1.53092	15.9869	10.4427	3.38442	1.20369e-06	0.000120159
D8674_039554	gnl|WGS:SMOL|Pdr0g030690.1	GO:0005515(protein binding)	00630(Glyoxylate and dicarboxylate metabolism);00710(Carbon fixation in photosynthetic organisms)	K01602	EC:4.1.1.39	PREDICTED: ribulose bisphosphate carboxylase small chain, chloroplastic [Pyrus x bretschneideri]	8.85196	90.0044	10.1677	3.34593	1.27991e-06	0.000127096
D8674_010886	gnl|WGS:SMOL|Pdr14g001230.1	GO:0003677(DNA binding);GO:0003700(DNA binding transcription factor activity);GO:0005515(protein binding);GO:0005634(nucleus);GO:0006351(transcription, DNA-templated);GO:0006355(regulation of transcription, DNA-templated);GO:0009408(response to heat);GO:0010200(response to chitin);GO:0043565(sequence-specific DNA binding)	NA	NA	NA	PREDICTED: heat stress transcription factor A-3-like [Pyrus x bretschneideri]	0.511681	5.57416	10.8938	3.44544	1.30678e-06	0.000128412
D8674_033184	gnl|WGS:SMOL|Pdr8g007300.1	GO:0009055(electron transfer activity);GO:0009416(response to light stimulus);GO:0009507(chloroplast);GO:0009570(chloroplast stroma);GO:0009643(photosynthetic acclimation);GO:0009767(photosynthetic electron transport chain);GO:0046872(metal ion binding);GO:0051537(2 iron, 2 sulfur cluster binding)	00195(Photosynthesis)	K02639	NA	PREDICTED: ferredoxin, leaf L-A-like [Pyrus x bretschneideri]	35.8433	352.16	9.82499	3.29646	1.64985e-06	0.000156421
D8674_013384	gnl|WGS:SMOL|Pdr15g006760.1	GO:0004842(ubiquitin-protein transferase activity);GO:0005576(extracellular region);GO:0005886(plasma membrane);GO:0008270(zinc ion binding);GO:0009814(defense response, incompatible interaction);GO:0009816(defense response to bacterium, incompatible interaction);GO:0010200(response to chitin);GO:0016021(integral component of membrane);GO:0016567(protein ubiquitination);GO:0043161(proteasome-medi…	NA	NA	NA	PREDICTED: E3 ubiquitin-protein ligase ATL31-like isoform X1 [Pyrus x bretschneideri]	28.597	277.898	9.71775	3.28062	1.72782e-06	0.000162994
D8674_017969	gnl|WGS:SMOL|Pdr16g023740.1	NA	NA	NA	NA	PREDICTED: uncharacterized protein LOC103941498 [Pyrus x bretschneideri]	3.51961	37.2949	10.5963	3.40549	1.82512e-06	0.000171316
D8674_018320	gnl|WGS:SMOL|Pdr17g002500.1	GO:0003674(molecular_function);GO:0005886(plasma membrane)	NA	NA	NA	PREDICTED: uncharacterized protein LOC103951026 [Pyrus x bretschneideri]	0.876468	8.87087	10.1212	3.3393	1.85744e-06	0.000173013
D8674_028052	gnl|WGS:SMOL|Pdr5g025280.1	GO:0005509(calcium ion binding);GO:0009507(chloroplast);GO:0009534(chloroplast thylakoid);GO:0009535(chloroplast thylakoid membrane);GO:0009543(chloroplast thylakoid lumen);GO:0009570(chloroplast stroma);GO:0009579(thylakoid);GO:0009654(photosystem II oxygen evolving complex);GO:0015979(photosynthesis);GO:0019898(extrinsic component of membrane);GO:0030095(chloroplast photosystem II);GO:0031977(t…	00195(Photosynthesis)	K08901	NA	PREDICTED: oxygen-evolving enhancer protein 3-2, chloroplastic [Pyrus x bretschneideri]	35.5435	342.226	9.62835	3.26729	1.86153e-06	0.000173013
D8674_019975	gnl|WGS:SMOL|Pdr17g019050.1	GO:0003677(DNA binding);GO:0003700(DNA binding transcription factor activity);GO:0005634(nucleus);GO:0006355(regulation of transcription, DNA-templated);GO:0007623(circadian rhythm);GO:0009734(auxin-activated signaling pathway);GO:0009851(auxin biosynthetic process);GO:0010600(regulation of auxin biosynthetic process)	04712(Circadian rhythm - plant)	K12133	NA	PREDICTED: protein REVEILLE 1 [Pyrus x bretschneideri]	0.988141	9.82364	9.94153	3.31347	2.0402e-06	0.000187768
D8674_006919	gnl|WGS:SMOL|Pdr11g021800.1	GO:0003824(catalytic activity);GO:0004721(phosphoprotein phosphatase activity);GO:0009507(chloroplast);GO:0009570(chloroplast stroma);GO:0010027(thylakoid membrane organization);GO:0035970(peptidyl-threonine dephosphorylation);GO:0046872(metal ion binding);GO:0071482(cellular response to light stimulus)	NA	NA	NA	PREDICTED: probable protein phosphatase 2C 26 [Pyrus x bretschneideri]	0.879118	9.0166	10.2564	3.35846	2.35096e-06	0.000212227
D8674_042923	gnl|WGS:SMOL|Pdr0g064380.1	GO:0008150(biological_process);GO:0009507(chloroplast)	NA	NA	NA	PREDICTED: uncharacterized protein LOC103953934 [Pyrus x bretschneideri]	41.1356	380.923	9.26019	3.21104	2.57487e-06	0.000230237
D8674_034532	gnl|WGS:SMOL|Pdr8g020780.1	GO:0009055(electron transfer activity);GO:0009416(response to light stimulus);GO:0009507(chloroplast);GO:0009570(chloroplast stroma);GO:0009643(photosynthetic acclimation);GO:0009767(photosynthetic electron transport chain);GO:0046872(metal ion binding);GO:0051537(2 iron, 2 sulfur cluster binding)	00195(Photosynthesis)	K02639	NA	PREDICTED: ferredoxin, leaf L-A-like [Pyrus x bretschneideri]	39.6536	359.235	9.05933	3.1794	3.11261e-06	0.000269314
D8674_016202	gnl|WGS:SMOL|Pdr16g006070.1	GO:0003677(DNA binding);GO:0003700(DNA binding transcription factor activity);GO:0005515(protein binding);GO:0005634(nucleus);GO:0006351(transcription, DNA-templated);GO:0006355(regulation of transcription, DNA-templated);GO:0009908(flower development);GO:0043565(sequence-specific DNA binding);GO:0046872(metal ion binding);GO:0048510(regulation of timing of transition from vegetative to reproduct…	04712(Circadian rhythm - plant)	K16222	NA	PREDICTED: cyclic dof factor 2-like [Pyrus x bretschneideri]	2.33394	21.3918	9.1655	3.19621	3.35136e-06	0.000282278
D8674_021286	gnl|WGS:SMOL|Pdr3g000860.1	GO:0000139(Golgi membrane);GO:0005794(Golgi apparatus);GO:0005886(plasma membrane);GO:0006486(protein glycosylation);GO:0009834(plant-type secondary cell wall biogenesis);GO:0010417(glucuronoxylan biosynthetic process);GO:0015020(glucuronosyltransferase activity);GO:0016021(integral component of membrane);GO:0016740(transferase activity);GO:0071555(cell wall organization)	NA	NA	NA	PREDICTED: probable glucuronoxylan glucuronosyltransferase IRX7 [Pyrus x bretschneideri]	4.99155	44.7619	8.96754	3.16471	3.69082e-06	0.000300402
D8674_014639	gnl|WGS:SMOL|Pdr15g019310.1	GO:0009507(chloroplast);GO:0016491(oxidoreductase activity);GO:0055114(oxidation-reduction process)	03030(DNA replication)	K02209	EC:3.6.4.12	PREDICTED: uncharacterized protein LOC103955947 [Pyrus x bretschneideri]	1.53687	14.2247	9.25562	3.21033	3.69393e-06	0.000300402
D8674_016954	gnl|WGS:SMOL|Pdr16g013590.1	GO:0005524(ATP binding);GO:0005634(nucleus);GO:0005829(cytosol);GO:0006090(pyruvate metabolic process);GO:0009507(chloroplast);GO:0009570(chloroplast stroma);GO:0015979(photosynthesis);GO:0016301(kinase activity);GO:0016310(phosphorylation);GO:0046872(metal ion binding);GO:0050242(pyruvate, phosphate dikinase activity)	00620(Pyruvate metabolism);00710(Carbon fixation in photosynthetic organisms)	K01006	EC:2.7.9.1	hypothetical protein DVH24_025594 [Malus domestica]	2.54041	22.447	8.83596	3.14339	4.43652e-06	0.000351697
D8674_019473	gnl|WGS:SMOL|Pdr17g014030.1	GO:0006979(response to oxidative stress);GO:0016020(membrane)	NA	NA	NA	hypothetical protein DVH24_031283 [Malus domestica]	5.69289	49.8129	8.75002	3.12929	4.55973e-06	0.000359952
D8674_021046	gnl|WGS:SMOL|Pdr2g010040.1	GO:0003674(molecular_function);GO:0005634(nucleus);GO:0006351(transcription, DNA-templated);GO:0006355(regulation of transcription, DNA-templated);GO:0048511(rhythmic process)	NA	NA	NA	PREDICTED: protein LNK2 [Pyrus x bretschneideri]	1.2538	11.1288	8.87606	3.14992	4.62967e-06	0.00036395
D8674_023098	gnl|WGS:SMOL|Pdr3g018980.1	GO:0003955(NAD(P)H dehydrogenase (quinone) activity);GO:0005737(cytoplasm);GO:0005886(plasma membrane);GO:0055114(oxidation-reduction process)	00130(Ubiquinone and other terpenoid-quinone biosynthesis)	K03809	EC:1.6.5.2	PREDICTED: probable NAD(P)H dehydrogenase (quinone) FQR1-like 3 [Pyrus x bretschneideri]	15.3256	131.038	8.55027	3.09597	5.09952e-06	0.000394314
D8674_019360	gnl|WGS:SMOL|Pdr17g012900.1	NA	NA	NA	NA	hypothetical protein DVH24_031430 [Malus domestica]	3.528	30.9303	8.76709	3.1321	5.37346e-06	0.00041045
D8674_024520	gnl|WGS:SMOL|Pdr4g010930.1	NA	NA	NA	NA	PREDICTED: uncharacterized protein LOC108173326 [Malus domestica]	44.5906	373.243	8.37045	3.0653	6.00173e-06	0.000454758
D8674_035497	gnl|WGS:SMOL|Pdr9g009560.1	GO:0003712(transcription cofactor activity);GO:0004402(histone acetyltransferase activity);GO:0005634(nucleus);GO:0006351(transcription, DNA-templated);GO:0006355(regulation of transcription, DNA-templated);GO:0006473(protein acetylation);GO:0008270(zinc ion binding);GO:0009908(flower development);GO:0016573(histone acetylation)	NA	NA	NA	PREDICTED: histone acetyltransferase HAC1-like isoform X1 [Pyrus x bretschneideri]	0.680376	5.91038	8.68693	3.11885	6.37687e-06	0.00047743
D8674_002263	gnl|WGS:SMOL|Pdr10g004170.1	GO:0005737(cytoplasm);GO:0006457(protein folding);GO:0051082(unfolded protein binding)	NA	NA	NA	hypothetical protein DVH24_017269, partial [Malus domestica]	1.8035	15.5039	8.59657	3.10376	6.53691e-06	0.000487477
D8674_024095	gnl|WGS:SMOL|Pdr4g006680.1	GO:0003876(AMP deaminase activity);GO:0005515(protein binding);GO:0005524(ATP binding);GO:0005634(nucleus);GO:0005783(endoplasmic reticulum);GO:0005829(cytosol);GO:0009168(purine ribonucleoside monophosphate biosynthetic process);GO:0009737(response to abscisic acid);GO:0009793(embryo development ending in seed dormancy);GO:0031307(integral component of mitochondrial outer membrane);GO:0032264(IM…	00230(Purine metabolism)	K01490	EC:3.5.4.6	PREDICTED: AMP deaminase isoform X1 [Prunus mume]	1.91225	15.9898	8.36177	3.06381	6.80941e-06	0.000498399
D8674_017060	gnl|WGS:SMOL|Pdr16g014650.1	GO:0005524(ATP binding);GO:0005737(cytoplasm);GO:0006457(protein folding);GO:0009408(response to heat);GO:0009644(response to high light intensity);GO:0031072(heat shock protein binding);GO:0042026(protein refolding);GO:0042542(response to hydrogen peroxide);GO:0044183(protein binding involved in protein folding)	NA	NA	NA	PREDICTED: heat shock 70 kDa protein 8-like [Pyrus x bretschneideri]	8.87455	73.2909	8.25855	3.04589	6.81544e-06	0.000498399
D8674_016941	gnl|WGS:SMOL|Pdr16g013460.1	GO:0004190(aspartic-type endopeptidase activity);GO:0006508(proteolysis);GO:0030163(protein catabolic process)	NA	NA	NA	PREDICTED: basic 7S globulin [Malus domestica]	0.743212	6.60255	8.8838	3.15118	7.32341e-06	0.000527327
D8674_004866	gnl|WGS:SMOL|Pdr11g001270.1	GO:0009699(phenylpropanoid biosynthetic process);GO:0042349(guiding stereospecific synthesis activity)	NA	NA	NA	hypothetical protein DVH24_027256 [Malus domestica]	1.66443	14.4173	8.66203	3.1147	7.55242e-06	0.000535682
D8674_018523	gnl|WGS:SMOL|Pdr17g004530.1	GO:0009543(chloroplast thylakoid lumen);GO:0010206(photosystem II repair);GO:0010207(photosystem II assembly)	00195(Photosynthesis)	K08902	NA	PREDICTED: photosystem II repair protein PSB27-H1, chloroplastic-like [Malus domestica]	5.25753	43.5093	8.27562	3.04887	7.69172e-06	0.00054352
D8674_007515	gnl|WGS:SMOL|Pdr12g002230.1	GO:0003674(molecular_function);GO:0008150(biological_process);GO:0009507(chloroplast);GO:0016021(integral component of membrane)	NA	NA	NA	hypothetical protein DVH24_036925 [Malus domestica]	2.13245	17.8667	8.37848	3.06669	7.89649e-06	0.000555099
D8674_006667	gnl|WGS:SMOL|Pdr11g019280.1	GO:0005524(ATP binding);GO:0005618(cell wall);GO:0005634(nucleus);GO:0009409(response to cold);GO:0009416(response to light stimulus);GO:0009507(chloroplast);GO:0009535(chloroplast thylakoid membrane);GO:0009570(chloroplast stroma);GO:0009579(thylakoid);GO:0009753(response to jasmonic acid);GO:0009941(chloroplast envelope);GO:0010150(leaf senescence);GO:0010287(plastoglobule);GO:0010319(stromule)…	03010(Ribosome)	K02960	NA	ribulose bisphosphate carboxylase/oxygenase activase 2 [Pyrus x bretschneideri]	10.4995	85.4925	8.14256	3.02548	7.91443e-06	0.000555099
D8674_009723	gnl|WGS:SMOL|Pdr13g004030.1	GO:0003954(NADH dehydrogenase activity);GO:0005768(endosome);GO:0005794(Golgi apparatus);GO:0005802(trans-Golgi network);GO:0005886(plasma membrane);GO:0016021(integral component of membrane);GO:0051536(iron-sulfur cluster binding)	NA	NA	NA	PREDICTED: CASP-like protein 1D1 [Pyrus x bretschneideri]	43.4036	350.55	8.07651	3.01373	8.00455e-06	0.000557277
D8674_021227	gnl|WGS:SMOL|Pdr3g000270.1	GO:0000139(Golgi membrane);GO:0005794(Golgi apparatus);GO:0005886(plasma membrane);GO:0006486(protein glycosylation);GO:0009834(plant-type secondary cell wall biogenesis);GO:0010417(glucuronoxylan biosynthetic process);GO:0015020(glucuronosyltransferase activity);GO:0016021(integral component of membrane);GO:0016740(transferase activity);GO:0071555(cell wall organization)	NA	NA	NA	PREDICTED: probable glucuronoxylan glucuronosyltransferase IRX7 [Pyrus x bretschneideri]	4.74159	38.499	8.11943	3.02138	8.44709e-06	0.000578684
D8674_033592	gnl|WGS:SMOL|Pdr8g011380.1	GO:0000977(RNA polymerase II regulatory region sequence-specific DNA binding);GO:0003700(DNA binding transcription factor activity);GO:0005515(protein binding);GO:0005634(nucleus);GO:0005737(cytoplasm);GO:0006351(transcription, DNA-templated);GO:0009739(response to gibberellin);GO:0010076(maintenance of floral meristem identity);GO:0010077(maintenance of inflorescence meristem identity);GO:001022…	NA	NA	NA	PREDICTED: MADS-box protein AGL24-like [Pyrus x bretschneideri]	1.07154	9.33038	8.70744	3.12225	8.49608e-06	0.000578684
D8674_023456	gnl|WGS:SMOL|Pdr4g000290.1	GO:0003674(molecular_function);GO:0008150(biological_process);GO:0009507(chloroplast);GO:0016021(integral component of membrane)	NA	NA	NA	hypothetical protein DVH24_036925 [Malus domestica]	1.17462	10.0117	8.52332	3.09142	8.98564e-06	0.000601178
D8674_024477	gnl|WGS:SMOL|Pdr4g010500.1	GO:0009834(plant-type secondary cell wall biogenesis);GO:0010417(glucuronoxylan biosynthetic process);GO:0042285(xylosyltransferase activity)	NA	NA	NA	PREDICTED: probable beta-1,4-xylosyltransferase IRX9 [Pyrus x bretschneideri]	2.52967	20.2764	8.01543	3.00278	1.00813e-05	0.000655876
D8674_012544	gnl|WGS:SMOL|Pdr14g017810.1	GO:0010189(vitamin E biosynthetic process);GO:0015995(chlorophyll biosynthetic process);GO:0033385(geranylgeranyl diphosphate metabolic process);GO:0033521(phytyl diphosphate biosynthetic process);GO:0045550(geranylgeranyl reductase activity)	00860(Porphyrin and chlorophyll metabolism);00900(Terpenoid backbone biosynthesis)	K10960	EC:1.3.1.83;EC:1.3.1.111	PREDICTED: geranylgeranyl diphosphate reductase, chloroplastic [Malus domestica]	23.5058	182.992	7.78495	2.96069	1.17645e-05	0.000739871
D8674_012691	gnl|WGS:SMOL|Pdr14g019280.1	GO:0003674(molecular_function);GO:0008150(biological_process)	NA	NA	NA	PREDICTED: uncharacterized protein LOC103938811 [Pyrus x bretschneideri]	778.786	5961.48	7.65484	2.93637	1.23133e-05	0.000764193
D8674_031935	gnl|WGS:SMOL|Pdr7g018590.1	GO:0000976(transcription regulatory region sequence-specific DNA binding);GO:0003677(DNA binding);GO:0003700(DNA binding transcription factor activity);GO:0005634(nucleus);GO:0006351(transcription, DNA-templated);GO:0006355(regulation of transcription, DNA-templated);GO:0009414(response to water deprivation);GO:0009873(ethylene-activated signaling pathway);GO:0019760(glucosinolate metabolic proce…	NA	NA	NA	PREDICTED: ethylene-responsive transcription factor ERF106 [Pyrus x bretschneideri]	19.5286	149.115	7.6357	2.93276	1.28776e-05	0.000793991
D8674_035791	gnl|WGS:SMOL|Pdr9g012500.1	GO:0009416(response to light stimulus);GO:0009535(chloroplast thylakoid membrane);GO:0009768(photosynthesis, light harvesting in photosystem I);GO:0009941(chloroplast envelope);GO:0010287(plastoglobule);GO:0016168(chlorophyll binding);GO:0031409(pigment binding)	00196(Photosynthesis - antenna proteins)	K08913	NA	hypothetical protein DVH24_032460 [Malus domestica]	25.4505	192.917	7.58008	2.92221	1.35916e-05	0.000829878
D8674_015742	gnl|WGS:SMOL|Pdr16g001470.1	GO:0005576(extracellular region);GO:0005618(cell wall);GO:0005886(plasma membrane);GO:0006952(defense response);GO:0009505(plant-type cell wall);GO:0030414(peptidase inhibitor activity);GO:0031640(killing of cells of other organism);GO:0050832(defense response to fungus)	NA	NA	NA	PREDICTED: defensin-like protein isoform X1 [Pyrus x bretschneideri]	2.34874	19.1756	8.16423	3.02932	1.36657e-05	0.000830348
D8674_018949	gnl|WGS:SMOL|Pdr17g008790.1	GO:0004617(phosphoglycerate dehydrogenase activity);GO:0009070(serine family amino acid biosynthetic process)	00260(Glycine, serine and threonine metabolism)	K00058	EC:1.1.1.95;EC:1.1.1.399	PREDICTED: D-3-phosphoglycerate dehydrogenase 2, chloroplastic-like [Pyrus x bretschneideri]	1.41937	11.0803	7.80653	2.96468	1.37313e-05	0.000830348
D8674_030339	gnl|WGS:SMOL|Pdr7g002630.1	GO:0004843(thiol-dependent ubiquitin-specific protease activity);GO:0005515(protein binding);GO:0005634(nucleus);GO:0005737(cytoplasm);GO:0005829(cytosol);GO:0006511(ubiquitin-dependent protein catabolic process);GO:0009506(plasmodesma);GO:0009867(jasmonic acid mediated signaling pathway);GO:0016579(protein deubiquitination);GO:0036459(thiol-dependent ubiquitinyl hydrolase activity)	NA	NA	NA	hypothetical protein DVH24_015835 [Malus domestica]	5.81007	44.1339	7.59611	2.92526	1.43246e-05	0.000857976
D8674_042643	gnl|WGS:SMOL|Pdr0g061580.1	GO:0003674(molecular_function);GO:0008150(biological_process)	NA	NA	NA	PREDICTED: uncharacterized protein LOC103938811 [Pyrus x bretschneideri]	689.547	5174.77	7.5046	2.90778	1.44748e-05	0.00086423
D8674_010798	gnl|WGS:SMOL|Pdr14g000350.1	GO:0005887(integral component of plasma membrane);GO:0008519(ammonium transmembrane transporter activity);GO:0015695(organic cation transport);GO:0019740(nitrogen utilization);GO:0072488(ammonium transmembrane transport)	NA	NA	NA	PREDICTED: protein NDH-DEPENDENT CYCLIC ELECTRON FLOW 5 [Pyrus x bretschneideri]	1.65856	12.957	7.81224	2.96574	1.51167e-05	0.000896879
D8674_028279	gnl|WGS:SMOL|Pdr6g000870.1	NA	NA	NA	NA	PREDICTED: uncharacterized protein LOC103955528 [Pyrus x bretschneideri]	1.86366	14.7412	7.90978	2.98364	1.54502e-05	0.000910932
D8674_022602	gnl|WGS:SMOL|Pdr3g014020.1	GO:0016757(transferase activity, transferring glycosyl groups);GO:0033577(protein glycosylation in endoplasmic reticulum)	00510(N-Glycan biosynthesis)	K03843	EC:2.4.1.132;EC:2.4.1.257	PREDICTED: alpha-1,3/1,6-mannosyltransferase ALG2-like [Pyrus x bretschneideri]	1.56909	12.2023	7.77665	2.95915	1.5869e-05	0.000932714
D8674_006859	gnl|WGS:SMOL|Pdr11g021200.1	GO:0003824(catalytic activity);GO:0005829(cytosol);GO:0009809(lignin biosynthetic process);GO:0016621(cinnamoyl-CoA reductase activity);GO:0050662(coenzyme binding)	00940(Phenylpropanoid biosynthesis)	K09753	EC:1.2.1.44	PREDICTED: cinnamoyl-CoA reductase 1-like [Pyrus x bretschneideri]	95.2689	698.091	7.32758	2.87334	1.76202e-05	0.00101664
D8674_004855	gnl|WGS:SMOL|Pdr11g001160.1	GO:0005634(nucleus);GO:0005769(early endosome);GO:0005798(Golgi-associated vesicle);GO:0005886(plasma membrane);GO:0008270(zinc ion binding);GO:0016020(membrane);GO:0016021(integral component of membrane);GO:0016567(protein ubiquitination);GO:0030100(regulation of endocytosis);GO:0043161(proteasome-mediated ubiquitin-dependent protein catabolic process);GO:0046872(metal ion binding);GO:0061630(ub…	NA	NA	NA	hypothetical protein DVH24_027267 [Malus domestica]	5.31287	39.0925	7.35808	2.87933	1.99733e-05	0.00112825
D8674_027993	gnl|WGS:SMOL|Pdr5g024690.1	NA	NA	NA	NA	-	106.941	765.189	7.15527	2.83901	2.1461e-05	0.00119069
D8674_029299	gnl|WGS:SMOL|Pdr6g011070.1	GO:0005887(integral component of plasma membrane);GO:0009992(cellular water homeostasis);GO:0015250(water channel activity);GO:0015254(glycerol channel activity);GO:0034220(ion transmembrane transport)	NA	NA	NA	PREDICTED: probable aquaporin NIP5-1 isoform X1 [Pyrus x bretschneideri]	7.14104	51.3573	7.19186	2.84636	2.15836e-05	0.00119069
D8674_033338	gnl|WGS:SMOL|Pdr8g008840.1	GO:0000981(RNA polymerase II transcription factor activity, sequence-specific DNA binding);GO:0001135(transcription factor activity, RNA polymerase II transcription factor recruiting);GO:0003677(DNA binding);GO:0003700(DNA binding transcription factor activity);GO:0005634(nucleus);GO:0006351(transcription, DNA-templated);GO:0006355(regulation of transcription, DNA-templated);GO:0006357(regulation…	NA	NA	NA	PREDICTED: transcription repressor MYB6-like [Pyrus x bretschneideri]	1.54872	11.4017	7.36198	2.88009	2.24441e-05	0.00122385
D8674_025450	gnl|WGS:SMOL|Pdr4g020230.1	GO:0009813(flavonoid biosynthetic process);GO:0043231(intracellular membrane-bounded organelle);GO:0052696(flavonoid glucuronidation);GO:0080043(quercetin 3-O-glucosyltransferase activity);GO:0080044(quercetin 7-O-glucosyltransferase activity)	NA	NA	NA	UDP-glucose:flavonoid 7-O-glucosyltransferase [Pyrus communis]	1.44783	10.6194	7.3347	2.87474	2.28038e-05	0.00123632
D8674_027995	gnl|WGS:SMOL|Pdr5g024710.1	GO:0003674(molecular_function);GO:0009507(chloroplast);GO:0009570(chloroplast stroma);GO:0010258(NADH dehydrogenase complex (plastoquinone) assembly)	NA	NA	NA	PREDICTED: uncharacterized protein LOC103419665 [Malus domestica]	3.55735	26.1605	7.35392	2.87851	2.3163e-05	0.00124862
D8674_022603	gnl|WGS:SMOL|Pdr3g014030.1	GO:0004672(protein kinase activity);GO:0005886(plasma membrane);GO:0007165(signal transduction);GO:0016021(integral component of membrane)	NA	NA	NA	PREDICTED: receptor-like protein 2 [Pyrus x bretschneideri]	2.07001	14.9818	7.23755	2.8555	2.36138e-05	0.00126929
D8674_018930	gnl|WGS:SMOL|Pdr17g008600.1	NA	NA	NA	NA	PREDICTED: uncharacterized protein LOC103966281 isoform X1 [Pyrus x bretschneideri]	0.660448	4.79433	7.25921	2.85981	2.39477e-05	0.00127995
D8674_001277	gnl|WGS:SMOL|Pdr1g012770.1	GO:0005634(nucleus);GO:0008150(biological_process)	NA	NA	NA	PREDICTED: trihelix transcription factor ASIL2-like [Pyrus x bretschneideri]	1.74324	12.6248	7.24215	2.85642	2.42649e-05	0.00128959
D8674_033316	gnl|WGS:SMOL|Pdr8g008620.1	GO:0009416(response to light stimulus);GO:0009535(chloroplast thylakoid membrane);GO:0009768(photosynthesis, light harvesting in photosystem I);GO:0009941(chloroplast envelope);GO:0010287(plastoglobule);GO:0016168(chlorophyll binding);GO:0031409(pigment binding)	00196(Photosynthesis - antenna proteins)	K08917	NA	PREDICTED: chlorophyll a-b binding protein CP24 10A, chloroplastic [Malus domestica]	2.77429	20.1203	7.25242	2.85846	2.49383e-05	0.00132166
D8674_026457	gnl|WGS:SMOL|Pdr5g009330.1	GO:0005737(cytoplasm);GO:0005829(cytosol);GO:0008270(zinc ion binding);GO:0009809(lignin biosynthetic process);GO:0016491(oxidoreductase activity);GO:0045551(cinnamyl-alcohol dehydrogenase activity);GO:0052747(sinapyl alcohol dehydrogenase activity);GO:0055114(oxidation-reduction process)	00940(Phenylpropanoid biosynthesis)	K00083	EC:1.1.1.195	hypothetical protein DVH24_021712 [Malus domestica]	4.15422	29.5546	7.11435	2.83073	2.51278e-05	0.00132797
D8674_011539	gnl|WGS:SMOL|Pdr14g007760.1	GO:0008152(metabolic process);GO:0016787(hydrolase activity)	00520(Amino sugar and nucleotide sugar metabolism)	K01097	EC:3.1.3.29	hypothetical protein DVH24_019714 [Malus domestica]	3.12001	22.323	7.15477	2.8389	2.52508e-05	0.00133075
D8674_025265	gnl|WGS:SMOL|Pdr4g018380.1	GO:0002020(protease binding);GO:0004869(cysteine-type endopeptidase inhibitor activity);GO:0005576(extracellular region);GO:0006952(defense response);GO:2000117(negative regulation of cysteine-type endopeptidase activity)	NA	NA	NA	PREDICTED: cysteine proteinase inhibitor B [Malus domestica]	10.7525	76.0071	7.06877	2.82146	2.57852e-05	0.00135512
D8674_004100	gnl|WGS:SMOL|Pdr10g022540.1	GO:0000326(protein storage vacuole);GO:0048316(seed development)	NA	NA	NA	PREDICTED: BURP domain protein USPL1-like isoform X1 [Pyrus x bretschneideri]	15.7435	109.217	6.93732	2.79438	2.77964e-05	0.00143672
D8674_042958	gnl|WGS:SMOL|Pdr0g064730.1	GO:0004674(protein serine/threonine kinase activity);GO:0005886(plasma membrane);GO:0006468(protein phosphorylation)	NA	NA	NA	PREDICTED: G-type lectin S-receptor-like serine/threonine-protein kinase At5g24080 [Pyrus x bretschneideri]	1.33116	9.47085	7.11475	2.83081	2.7871e-05	0.00143672
D8674_031708	gnl|WGS:SMOL|Pdr7g016320.1	GO:0005975(carbohydrate metabolic process);GO:0005986(sucrose biosynthetic process);GO:0006000(fructose metabolic process);GO:0006002(fructose 6-phosphate metabolic process);GO:0006094(gluconeogenesis);GO:0009507(chloroplast);GO:0009570(chloroplast stroma);GO:0009579(thylakoid);GO:0009941(chloroplast envelope);GO:0016051(carbohydrate biosynthetic process);GO:0019252(starch biosynthetic process);G…	00710(Carbon fixation in photosynthetic organisms)	K01100	EC:3.1.3.37	PREDICTED: sedoheptulose-1,7-bisphosphatase, chloroplastic-like [Pyrus x bretschneideri]	1.39112	9.97206	7.16836	2.84164	2.8268e-05	0.00144927
D8674_001191	gnl|WGS:SMOL|Pdr1g011910.1	GO:0005524(ATP binding);GO:0005618(cell wall);GO:0005634(nucleus);GO:0009409(response to cold);GO:0009416(response to light stimulus);GO:0009507(chloroplast);GO:0009535(chloroplast thylakoid membrane);GO:0009570(chloroplast stroma);GO:0009579(thylakoid);GO:0009753(response to jasmonic acid);GO:0009941(chloroplast envelope);GO:0010150(leaf senescence);GO:0010287(plastoglobule);GO:0010319(stromule)…	03010(Ribosome)	K02960	NA	PREDICTED: LOW QUALITY PROTEIN: ribulose bisphosphate carboxylase/oxygenase activase, chloroplastic [Pyrus x bretschneideri]	1.32373	9.44782	7.13727	2.83537	2.85035e-05	0.00145738
D8674_010832	gnl|WGS:SMOL|Pdr14g000690.1	NA	NA	NA	NA	hypothetical protein DVH24_019037 [Malus domestica]	68.0924	466.351	6.8488	2.77585	3.03396e-05	0.0015429
D8674_009468	gnl|WGS:SMOL|Pdr13g001480.1	GO:0003723(RNA binding);GO:0004519(endonuclease activity);GO:0008270(zinc ion binding);GO:0009451(RNA modification);GO:0009507(chloroplast);GO:0031425(chloroplast RNA processing);GO:1900865(chloroplast RNA modification)	NA	NA	NA	hypothetical protein DVH24_041112 [Malus domestica]	5.27115	36.2408	6.87531	2.78143	3.05787e-05	0.00155088
D8674_008570	gnl|WGS:SMOL|Pdr12g012780.1	GO:0003677(DNA binding);GO:0005515(protein binding);GO:0009507(chloroplast);GO:0009534(chloroplast thylakoid);GO:0009535(chloroplast thylakoid membrane);GO:0009658(chloroplast organization);GO:0009706(chloroplast inner membrane);GO:0009941(chloroplast envelope);GO:0015979(photosynthesis);GO:0015995(chlorophyll biosynthetic process);GO:0046872(metal ion binding);GO:0048529(magnesium-protoporphyrin…	00860(Porphyrin and chlorophyll metabolism)	K04035	EC:1.14.13.81	PREDICTED: magnesium-protoporphyrin IX monomethyl ester [oxidative] cyclase, chloroplastic [Pyrus x bretschneideri]	44.4115	300.661	6.76989	2.75913	3.32679e-05	0.00166049
D8674_018412	gnl|WGS:SMOL|Pdr17g003420.1	GO:0003674(molecular_function);GO:0005634(nucleus)	NA	NA	NA	PREDICTED: uncharacterized protein LOC103950977 [Pyrus x bretschneideri]	1.34268	9.90232	7.37504	2.88265	3.39005e-05	0.0016876
D8674_030012	gnl|WGS:SMOL|Pdr6g018200.1	GO:0006855(drug transmembrane transport)	NA	NA	NA	PREDICTED: LOW QUALITY PROTEIN: protein DETOXIFICATION 16-like [Pyrus x bretschneideri]	0.517891	3.78758	7.31347	2.87056	3.4144e-05	0.00169525
D8674_022554	gnl|WGS:SMOL|Pdr3g013540.1	NA	NA	NA	NA	PREDICTED: CLAVATA3/ESR (CLE)-related protein 1 [Pyrus x bretschneideri]	16.0124	110.84	6.92212	2.79121	3.45362e-05	0.00171022
D8674_000971	gnl|WGS:SMOL|Pdr1g009710.1	GO:0004842(ubiquitin-protein transferase activity);GO:0005576(extracellular region);GO:0008270(zinc ion binding)	00563(Glycosylphosphatidylinositol(GPI)-anchor biosynthesis)	K03857	EC:2.4.1.198	PREDICTED: uncharacterized protein LOC103936651 [Pyrus x bretschneideri]	1.38001	9.43304	6.83547	2.77304	3.7433e-05	0.00184399
D8674_032630	gnl|WGS:SMOL|Pdr8g001760.1	GO:0005730(nucleolus);GO:0005737(cytoplasm);GO:0008173(RNA methyltransferase activity);GO:0008757(S-adenosylmethionine-dependent methyltransferase activity);GO:0070475(rRNA base methylation)	NA	NA	NA	hypothetical protein DVH24_012676 [Malus domestica]	3.40798	23.4652	6.88538	2.78354	3.90915e-05	0.00190579
D8674_012550	gnl|WGS:SMOL|Pdr14g017870.1	GO:0009416(response to light stimulus);GO:0009535(chloroplast thylakoid membrane);GO:0009768(photosynthesis, light harvesting in photosystem I);GO:0009941(chloroplast envelope);GO:0010287(plastoglobule);GO:0016168(chlorophyll binding);GO:0031409(pigment binding)	00196(Photosynthesis - antenna proteins)	K08910	NA	PREDICTED: chlorophyll a-b binding protein P4, chloroplastic [Pyrus x bretschneideri]	3.89778	26.4178	6.77765	2.76079	4.00266e-05	0.00194635
D8674_014378	gnl|WGS:SMOL|Pdr15g016700.1	GO:0003674(molecular_function);GO:0005739(mitochondrion);GO:0048367(shoot system development)	NA	NA	NA	PREDICTED: uncharacterized protein LOC103929416 [Pyrus x bretschneideri]	4.1163	28.195	6.84961	2.77602	4.05097e-05	0.00195974
D8674_042023	gnl|WGS:SMOL|Pdr0g055380.1	GO:0004842(ubiquitin-protein transferase activity);GO:0005576(extracellular region);GO:0008270(zinc ion binding)	00563(Glycosylphosphatidylinositol(GPI)-anchor biosynthesis)	K03857	EC:2.4.1.198	PREDICTED: uncharacterized protein LOC103936651 [Pyrus x bretschneideri]	1.29083	8.73072	6.76364	2.7578	4.23918e-05	0.00202996
D8674_029316	gnl|WGS:SMOL|Pdr6g011240.1	GO:0003674(molecular_function);GO:0008150(biological_process);GO:0016021(integral component of membrane)	NA	NA	NA	PREDICTED: uncharacterized protein LOC103950766 [Pyrus x bretschneideri]	1.5734	11.0129	6.99946	2.80724	4.33734e-05	0.00205641
D8674_004243	gnl|WGS:SMOL|Pdr10g023970.1	GO:0004332(fructose-bisphosphate aldolase activity);GO:0006094(gluconeogenesis);GO:0006096(glycolytic process);GO:0006098(pentose-phosphate shunt);GO:0009507(chloroplast);GO:0009570(chloroplast stroma);GO:0009579(thylakoid);GO:0009737(response to abscisic acid);GO:0009941(chloroplast envelope);GO:0010287(plastoglobule);GO:0016020(membrane);GO:0046686(response to cadmium ion);GO:0048046(apoplast)	00010(Glycolysis / Gluconeogenesis);00030(Pentose phosphate pathway);00051(Fructose and mannose metabolism);00710(Carbon fixation in photosynthetic organisms)	K01623	EC:4.1.2.13	PREDICTED: fructose-bisphosphate aldolase 1, chloroplastic [Pyrus x bretschneideri]	10.7853	71.0006	6.58312	2.71877	4.33801e-05	0.00205641
D8674_013623	gnl|WGS:SMOL|Pdr15g009150.1	GO:0003674(molecular_function);GO:0009507(chloroplast);GO:0016021(integral component of membrane);GO:1990641(response to iron ion starvation)	NA	NA	NA	PREDICTED: uncharacterized protein ycf36-like [Pyrus x bretschneideri]	13.875	91.1194	6.56718	2.71527	4.41865e-05	0.0020738
D8674_033036	gnl|WGS:SMOL|Pdr8g005820.1	GO:0004672(protein kinase activity);GO:0005524(ATP binding);GO:0005576(extracellular region);GO:0005618(cell wall);GO:0006468(protein phosphorylation);GO:0009505(plant-type cell wall);GO:0009737(response to abscisic acid);GO:0009739(response to gibberellin);GO:0009740(gibberellic acid mediated signaling pathway);GO:0009741(response to brassinosteroid);GO:0009826(unidimensional cell growth);GO:001…	00563(Glycosylphosphatidylinositol(GPI)-anchor biosynthesis)	K03860	NA	GAST-like gene product [Fragaria x ananassa]	22.8692	150.116	6.5641	2.7146	4.76468e-05	0.00218783
D8674_010840	gnl|WGS:SMOL|Pdr14g000770.1	GO:0004672(protein kinase activity);GO:0004674(protein serine/threonine kinase activity);GO:0005524(ATP binding);GO:0005886(plasma membrane);GO:0006468(protein phosphorylation);GO:0007169(transmembrane receptor protein tyrosine kinase signaling pathway);GO:0009506(plasmodesma);GO:0016021(integral component of membrane)	04626(Plant-pathogen interaction)	K13435	NA	PREDICTED: probable inactive leucine-rich repeat receptor-like protein kinase At3g03770 isoform X1 [Pyrus x bretschneideri]	0.380583	2.67723	7.03455	2.81446	4.76598e-05	0.00218783
D8674_030809	gnl|WGS:SMOL|Pdr7g007330.1	GO:0003674(molecular_function);GO:0008150(biological_process)	NA	NA	NA	PREDICTED: uncharacterized protein LOC103962244 [Pyrus x bretschneideri]	3.17894	21.2804	6.69418	2.74291	4.83938e-05	0.00221076
D8674_015031	gnl|WGS:SMOL|Pdr15g023230.1	GO:0005249(voltage-gated potassium channel activity);GO:0005887(integral component of plasma membrane);GO:0042391(regulation of membrane potential)	NA	NA	NA	PREDICTED: potassium channel KAT3-like [Pyrus x bretschneideri]	4.42546	28.7998	6.50775	2.70216	4.8926e-05	0.00222431
D8674_021119	gnl|WGS:SMOL|Pdr2g010770.1	GO:0004022(alcohol dehydrogenase (NAD) activity);GO:0005794(Golgi apparatus);GO:0005829(cytosol);GO:0005886(plasma membrane);GO:0009506(plasmodesma);GO:0050662(coenzyme binding)	00940(Phenylpropanoid biosynthesis)	K09753	EC:1.2.1.44	PREDICTED: cinnamoyl-CoA reductase 1-like [Pyrus x bretschneideri]	1.67019	11.1379	6.66865	2.73739	5.24345e-05	0.00234984
D8674_039565	gnl|WGS:SMOL|Pdr0g030800.1	GO:0005634(nucleus);GO:0006355(regulation of transcription, DNA-templated);GO:0009640(photomorphogenesis)	NA	NA	NA	PREDICTED: B-box zinc finger protein 24-like [Pyrus x bretschneideri]	23.9764	151.927	6.33652	2.66369	5.61501e-05	0.00249855
D8674_005899	gnl|WGS:SMOL|Pdr11g011600.1	GO:0003674(molecular_function);GO:0009507(chloroplast);GO:0009535(chloroplast thylakoid membrane);GO:0009543(chloroplast thylakoid lumen);GO:0009611(response to wounding);GO:0010193(response to ozone);GO:0010224(response to UV-B);GO:0030095(chloroplast photosystem II)	NA	NA	NA	PREDICTED: photosystem II 5 kDa protein, chloroplastic [Malus domestica]	13.5742	86.7279	6.38916	2.67563	5.63441e-05	0.00250128
D8674_004787	gnl|WGS:SMOL|Pdr11g000480.1	GO:0005634(nucleus);GO:0005773(vacuole);GO:0006950(response to stress);GO:0016787(hydrolase activity)	NA	NA	NA	PREDICTED: universal stress protein A-like protein [Malus domestica]	10.338	65.9941	6.38364	2.67438	5.71419e-05	0.0025163
D8674_027760	gnl|WGS:SMOL|Pdr5g022360.1	GO:0009416(response to light stimulus);GO:0009535(chloroplast thylakoid membrane);GO:0009768(photosynthesis, light harvesting in photosystem I);GO:0009941(chloroplast envelope);GO:0010287(plastoglobule);GO:0016168(chlorophyll binding);GO:0031409(pigment binding)	00196(Photosynthesis - antenna proteins)	K08912	NA	PREDICTED: chlorophyll a-b binding protein of LHCII type 1-like [Malus domestica]	17.0347	107.654	6.31971	2.65986	5.77041e-05	0.00252884
D8674_040188	gnl|WGS:SMOL|Pdr0g037030.1	GO:0003674(molecular_function);GO:0005634(nucleus);GO:0008150(biological_process)	NA	NA	NA	PREDICTED: uncharacterized protein LOC103948423 [Pyrus x bretschneideri]	3.53414	22.5993	6.39459	2.67685	5.81907e-05	0.0025414
D8674_013617	gnl|WGS:SMOL|Pdr15g009090.4	GO:0005515(protein binding);GO:0005886(plasma membrane);GO:0009416(response to light stimulus);GO:0016567(protein ubiquitination);GO:0042742(defense response to bacterium)	03050(Proteasome)	K03063	NA	PREDICTED: BTB/POZ domain-containing protein At5g67385-like [Pyrus x bretschneideri]	1.99233	12.8311	6.44024	2.68711	5.89035e-05	0.00256067
D8674_002225	gnl|WGS:SMOL|Pdr10g003790.1	GO:0003674(molecular_function);GO:0005634(nucleus);GO:0008150(biological_process)	NA	NA	NA	PREDICTED: uncharacterized protein LOC103944203 [Pyrus x bretschneideri]	6.39241	40.5847	6.34889	2.6665	5.97941e-05	0.00259342
D8674_036292	gnl|WGS:SMOL|Pdr9g017510.1	GO:0004860(protein kinase inhibitor activity);GO:0005515(protein binding);GO:0005575(cellular_component);GO:0007049(cell cycle)	NA	NA	NA	PREDICTED: uncharacterized protein LOC103926966 [Pyrus x bretschneideri]	43.2233	270.606	6.26064	2.64631	6.15596e-05	0.00264566
D8674_011923	gnl|WGS:SMOL|Pdr14g011600.1	GO:0004467(long-chain fatty acid-CoA ligase activity);GO:0005524(ATP binding);GO:0005634(nucleus);GO:0005794(Golgi apparatus);GO:0005829(cytosol);GO:0005886(plasma membrane);GO:0006631(fatty acid metabolic process);GO:0006633(fatty acid biosynthetic process);GO:0102391(decanoate-CoA ligase activity)	00061(Fatty acid biosynthesis);00071(Fatty acid degradation);04146(Peroxisome)	K01897	EC:6.2.1.3	PREDICTED: long chain acyl-CoA synthetase 4-like [Pyrus x bretschneideri]	9.16461	57.443	6.26791	2.64798	6.20341e-05	0.00265999
D8674_042275	gnl|WGS:SMOL|Pdr0g057900.1	GO:0005737(cytoplasm);GO:0005829(cytosol);GO:0006457(protein folding);GO:0009507(chloroplast);GO:0009535(chloroplast thylakoid membrane);GO:0010598(NAD(P)H dehydrogenase complex (plastoquinone));GO:0016021(integral component of membrane);GO:0016491(oxidoreductase activity);GO:0048038(quinone binding);GO:0055114(oxidation-reduction process)	NA	NA	NA	PREDICTED: NAD(P)H-quinone oxidoreductase subunit T, chloroplastic-like [Pyrus x bretschneideri]	0.887313	6.0793	6.85136	2.77639	6.2269e-05	0.00266401
D8674_029859	gnl|WGS:SMOL|Pdr6g016670.1	NA	NA	NA	NA	PREDICTED: uncharacterized protein LOC103437894 [Malus domestica]	1.97955	13.424	6.78134	2.76157	6.68531e-05	0.00282174
D8674_008996	gnl|WGS:SMOL|Pdr12g017040.1	GO:0004842(ubiquitin-protein transferase activity);GO:0031463(Cul3-RING ubiquitin ligase complex)	NA	NA	NA	PREDICTED: F-box/kelch-repeat protein At2g44130-like [Malus domestica]	26.4468	163.385	6.17789	2.62711	6.8119e-05	0.00286875
D8674_006867	gnl|WGS:SMOL|Pdr11g021280.1	NA	NA	NA	NA	PREDICTED: myosin heavy chain, non-muscle-like isoform X1 [Pyrus x bretschneideri]	4.96445	30.7592	6.1959	2.63131	6.86141e-05	0.00288317
D8674_010833	gnl|WGS:SMOL|Pdr14g000700.1	NA	NA	NA	NA	-	737.468	4473.1	6.06548	2.60062	7.7556e-05	0.00321593
D8674_005424	gnl|WGS:SMOL|Pdr11g006850.1	GO:0005515(protein binding);GO:0009507(chloroplast);GO:0009534(chloroplast thylakoid);GO:0009640(photomorphogenesis);GO:0009647(skotomorphogenesis);GO:0009723(response to ethylene);GO:0009941(chloroplast envelope);GO:0015979(photosynthesis);GO:0015995(chlorophyll biosynthetic process);GO:0016491(oxidoreductase activity);GO:0016630(protochlorophyllide reductase activity);GO:0055114(oxidation-reduc…	00860(Porphyrin and chlorophyll metabolism)	K00218	EC:1.3.1.33	PREDICTED: protochlorophyllide reductase, chloroplastic [Pyrus x bretschneideri]	11.6747	71.0146	6.08279	2.60473	7.79993e-05	0.00322722
D8674_040720	gnl|WGS:SMOL|Pdr0g042350.1	GO:0005249(voltage-gated potassium channel activity);GO:0005887(integral component of plasma membrane);GO:0042391(regulation of membrane potential)	NA	NA	NA	PREDICTED: potassium channel AKT2/3 isoform X1 [Pyrus x bretschneideri]	1.0583	6.57612	6.21387	2.63549	7.83793e-05	0.00323585
D8674_008296	gnl|WGS:SMOL|Pdr12g010040.1	GO:0003677(DNA binding);GO:0003700(DNA binding transcription factor activity);GO:0005634(nucleus);GO:0006351(transcription, DNA-templated);GO:0006355(regulation of transcription, DNA-templated);GO:0009651(response to salt stress);GO:0009723(response to ethylene);GO:0009733(response to auxin);GO:0009737(response to abscisic acid);GO:0009739(response to gibberellin);GO:0009751(response to salicylic…	04712(Circadian rhythm - plant)	K12133	NA	PREDICTED: protein REVEILLE 8 isoform X3 [Pyrus x bretschneideri]	1.06087	6.84924	6.45628	2.6907	8.02593e-05	0.00329185
D8674_007518	gnl|WGS:SMOL|Pdr12g002260.1	GO:0000103(sulfate assimilation);GO:0006457(protein folding);GO:0009507(chloroplast);GO:0015035(protein disulfide oxidoreductase activity);GO:0016671(oxidoreductase activity, acting on a sulfur group of donors, disulfide as acceptor);GO:0034599(cellular response to oxidative stress);GO:0045454(cell redox homeostasis);GO:0055114(oxidation-reduction process)	NA	NA	NA	PREDICTED: thioredoxin F-type, chloroplastic-like isoform X2 [Malus domestica]	5.16444	31.6945	6.13706	2.61755	8.13396e-05	0.00332892
D8674_026682	gnl|WGS:SMOL|Pdr5g011580.1	GO:0005887(integral component of plasma membrane);GO:0009705(plant-type vacuole membrane);GO:0009992(cellular water homeostasis);GO:0015250(water channel activity);GO:0015254(glycerol channel activity);GO:0034220(ion transmembrane transport);GO:0042807(central vacuole)	04075(Plant hormone signal transduction)	K14488	NA	hypothetical protein DVH24_009906 [Malus domestica]	4.88093	31.5923	6.4726	2.69434	8.18997e-05	0.00333726
D8674_017797	gnl|WGS:SMOL|Pdr16g022020.1	GO:0004375(glycine dehydrogenase (decarboxylating) activity);GO:0005739(mitochondrion);GO:0005960(glycine cleavage complex);GO:0006546(glycine catabolic process);GO:0009507(chloroplast);GO:0019464(glycine decarboxylation via glycine cleavage system)	00630(Glyoxylate and dicarboxylate metabolism);00260(Glycine, serine and threonine metabolism)	K02437	NA	PREDICTED: glycine cleavage system H protein 3, mitochondrial [Pyrus x bretschneideri]	4.0259	24.9654	6.2012	2.63255	8.3666e-05	0.00338014
D8674_030001	gnl|WGS:SMOL|Pdr6g018090.1	GO:0006869(lipid transport);GO:0042626(ATPase activity, coupled to transmembrane movement of substances);GO:0043231(intracellular membrane-bounded organelle)	02010(ABC transporters)	K05641	NA	PREDICTED: ABC transporter A family member 2-like [Malus domestica]	11.0491	66.3987	6.00944	2.58723	8.44841e-05	0.00340161
D8674_042636	gnl|WGS:SMOL|Pdr0g061510.1	GO:0004849(uridine kinase activity);GO:0005829(cytosol);GO:0006206(pyrimidine nucleobase metabolic process);GO:0009507(chloroplast);GO:0043097(pyrimidine nucleoside salvage)	00710(Carbon fixation in photosynthetic organisms)	K00855	EC:2.7.1.19	PREDICTED: phosphoribulokinase, chloroplastic-like [Pyrus x bretschneideri]	3.62494	22.0879	6.09332	2.60723	8.45579e-05	0.00340161
D8674_012914	gnl|WGS:SMOL|Pdr15g002060.1	GO:0009061(anaerobic respiration);GO:0018171(peptidyl-cysteine oxidation);GO:0070483(detection of hypoxia)	00430(Taurine and hypotaurine metabolism)	K10712	EC:1.13.11.19	PREDICTED: plant cysteine oxidase 1-like isoform X2 [Pyrus x bretschneideri]	14.672	88.4099	6.02576	2.59114	8.74502e-05	0.00350302
D8674_027757	gnl|WGS:SMOL|Pdr5g022330.1	GO:0004674(protein serine/threonine kinase activity);GO:0004675(transmembrane receptor protein serine/threonine kinase activity);GO:0005515(protein binding);GO:0005524(ATP binding);GO:0005768(endosome);GO:0005886(plasma membrane);GO:0006468(protein phosphorylation);GO:0006898(receptor-mediated endocytosis);GO:0007169(transmembrane receptor protein tyrosine kinase signaling pathway);GO:0010008(end…	04016(MAPK signaling pathway - plant);04626(Plant-pathogen interaction)	K13420	EC:2.7.11.1	FLS2 [Malus domestica]	2.99125	18.0398	6.03088	2.59237	8.76645e-05	0.00350417
D8674_020493	gnl|WGS:SMOL|Pdr2g004510.1	GO:0005515(protein binding);GO:0005737(cytoplasm);GO:0005783(endoplasmic reticulum);GO:0009699(phenylpropanoid biosynthetic process);GO:0009813(flavonoid biosynthetic process);GO:0010584(pollen exine formation);GO:0030639(polyketide biosynthetic process);GO:0080110(sporopollenin biosynthetic process);GO:0090439(tetraketide alpha-pyrone synthase activity)	00941(Flavonoid biosynthesis);04712(Circadian rhythm - plant)	K00660	EC:2.3.1.74	PREDICTED: type III polyketide synthase A isoform X2 [Malus domestica]	1.66262	10.405	6.25817	2.64574	8.9721e-05	0.00355296
D8674_003172	gnl|WGS:SMOL|Pdr10g013260.1	GO:0016020(membrane);GO:0016709(oxidoreductase activity, acting on paired donors, with incorporation or reduction of molecular oxygen, NAD(P)H as one donor, and incorporation of one atom of oxygen);GO:0044550(secondary metabolite biosynthetic process)	00904(Diterpenoid biosynthesis)	K17961	EC:1.14.14.58;EC:1.14.14.59	hypothetical protein DVH24_028552 [Malus domestica]	5.49017	33.0338	6.0169	2.58902	9.02956e-05	0.00356403
D8674_027446	gnl|WGS:SMOL|Pdr5g019220.1	GO:0005385(zinc ion transmembrane transporter activity);GO:0010043(response to zinc ion);GO:0016020(membrane);GO:0061088(regulation of sequestering of zinc ion)	NA	NA	NA	PREDICTED: metal tolerance protein 10-like [Pyrus x bretschneideri]	2.7223	16.7038	6.13589	2.61727	9.09019e-05	0.00358047
D8674_014508	gnl|WGS:SMOL|Pdr15g018000.1	GO:0005737(cytoplasm);GO:0006979(response to oxidative stress);GO:0016491(oxidoreductase activity);GO:0055114(oxidation-reduction process)	NA	NA	NA	PREDICTED: 2-alkenal reductase (NADP(+)-dependent)-like [Pyrus x bretschneideri]	1.33205	8.29469	6.227	2.63854	9.15676e-05	0.00359696
D8674_019319	gnl|WGS:SMOL|Pdr17g012490.1	GO:0009055(electron transfer activity);GO:0009507(chloroplast);GO:0009535(chloroplast thylakoid membrane);GO:0009773(photosynthetic electron transport in photosystem I);GO:0010598(NAD(P)H dehydrogenase complex (plastoquinone));GO:0046872(metal ion binding);GO:0051537(2 iron, 2 sulfur cluster binding)	NA	NA	NA	PREDICTED: photosynthetic NDH subunit of subcomplex B 3, chloroplastic [Malus domestica]	0.84668	5.47211	6.46302	2.69221	9.23098e-05	0.00360582
D8674_002763	gnl|WGS:SMOL|Pdr10g009170.1	GO:0004674(protein serine/threonine kinase activity);GO:0005886(plasma membrane);GO:0006468(protein phosphorylation)	04626(Plant-pathogen interaction)	K13466	NA	PREDICTED: probable LRR receptor-like serine/threonine-protein kinase At4g36180 [Pyrus x bretschneideri]	3.49616	20.8669	5.96853	2.57737	9.39536e-05	0.00366244
D8674_000836	gnl|WGS:SMOL|Pdr1g008360.1	GO:0003677(DNA binding);GO:0009295(nucleoid);GO:0009507(chloroplast);GO:0009508(plastid chromosome);GO:0009534(chloroplast thylakoid);GO:0009535(chloroplast thylakoid membrane);GO:0009579(thylakoid);GO:0009737(response to abscisic acid);GO:0009773(photosynthetic electron transport in photosystem I);GO:0009941(chloroplast envelope);GO:0016021(integral component of membrane);GO:0030093(chloroplast …	00562(Inositol phosphate metabolism);04070(Phosphatidylinositol signaling system)	K01092	EC:3.1.3.25	PREDICTED: protein CURVATURE THYLAKOID 1B, chloroplastic [Prunus mume]	1.87938	11.4698	6.10294	2.60951	9.93293e-05	0.00384814
D8674_027479	gnl|WGS:SMOL|Pdr5g019550.1	GO:0009705(plant-type vacuole membrane);GO:0016021(integral component of membrane)	NA	NA	NA	PREDICTED: organic cation/carnitine transporter 3-like [Pyrus x bretschneideri]	6.5656	39.0356	5.94547	2.57179	0.000101344	0.00391816
D8674_040337	gnl|WGS:SMOL|Pdr0g038520.1	GO:0008150(biological_process);GO:0009507(chloroplast);GO:0016021(integral component of membrane)	NA	NA	NA	PREDICTED: transmembrane protein 45A-like [Pyrus x bretschneideri]	2.9318	17.5482	5.98547	2.58147	0.000104858	0.00402925
D8674_042729	gnl|WGS:SMOL|Pdr0g062440.1	GO:0005737(cytoplasm);GO:0016740(transferase activity);GO:0016747(transferase activity, transferring acyl groups other than amino-acyl groups)	00940(Phenylpropanoid biosynthesis);00945(Stilbenoid, diarylheptanoid and gingerol biosynthesis);00941(Flavonoid biosynthesis)	K13065	EC:2.3.1.133	PREDICTED: vinorine synthase-like [Pyrus x bretschneideri]	0.714857	4.47388	6.25842	2.6458	0.00010982	0.00419427
D8674_004010	gnl|WGS:SMOL|Pdr10g021640.1	NA	NA	NA	NA	hypothetical protein DVH24_042243 [Malus domestica]	289.573	1676.71	5.79028	2.53363	0.000110854	0.00422523
D8674_034872	gnl|WGS:SMOL|Pdr9g003310.1	GO:0010638(positive regulation of organelle organization);GO:0045893(positive regulation of transcription, DNA-templated)	04075(Plant hormone signal transduction)	K14491	NA	PREDICTED: probable transcription factor GLK1 isoform X1 [Pyrus x bretschneideri]	0.49764	3.09118	6.21169	2.63498	0.000112121	0.00426488
D8674_007069	gnl|WGS:SMOL|Pdr11g023300.1	GO:0005515(protein binding);GO:0005634(nucleus);GO:0007049(cell cycle);GO:0016538(cyclin-dependent protein serine/threonine kinase regulator activity);GO:0051301(cell division);GO:0051726(regulation of cell cycle)	NA	NA	NA	PREDICTED: G2/mitotic-specific cyclin S13-7-like [Pyrus x bretschneideri]	1.19585	7.11345	5.94842	2.57251	0.000126126	0.00472148
D8674_001240	gnl|WGS:SMOL|Pdr1g012400.1	GO:0005515(protein binding);GO:0005737(cytoplasm);GO:0009408(response to heat);GO:0009644(response to high light intensity);GO:0010286(heat acclimation);GO:0042542(response to hydrogen peroxide)	04141(Protein processing in endoplasmic reticulum)	K13993	NA	PREDICTED: 16.9 kDa class I heat shock protein 2-like [Pyrus x bretschneideri]	5.35687	31.0927	5.80427	2.53711	0.000127222	0.00474368
D8674_035359	gnl|WGS:SMOL|Pdr9g008180.1	GO:0005739(mitochondrion)	NA	NA	NA	PREDICTED: peptidyl-tRNA hydrolase 2, mitochondrial isoform X1 [Pyrus x bretschneideri]	2.08363	12.3252	5.91528	2.56445	0.000127729	0.00475317
D8674_014829	gnl|WGS:SMOL|Pdr15g021210.1	GO:0004028(3-chloroallyl aldehyde dehydrogenase activity);GO:0004029(aldehyde dehydrogenase (NAD) activity)	00010(Glycolysis / Gluconeogenesis);00053(Ascorbate and aldarate metabolism);00620(Pyruvate metabolism);00071(Fatty acid degradation);00561(Glycerolipid metabolism);00280(Valine, leucine and isoleucine degradation);00310(Lysine degradation);00330(Arginine and proline metabolism);00340(Histidine metabolism);00380(Tryptophan metabolism);00410(beta-Alanine metabolism);00903(Limonene and pinene degra…	K00128	EC:1.2.1.3	PREDICTED: aldehyde dehydrogenase family 3 member H1-like [Pyrus x bretschneideri]	1.0432	6.07083	5.8194	2.54087	0.000132617	0.00490132
D8674_009656	gnl|WGS:SMOL|Pdr13g003360.1	GO:0003674(molecular_function);GO:0005634(nucleus);GO:0008150(biological_process)	NA	NA	NA	PREDICTED: uncharacterized protein LOC103430778 [Malus domestica]	0.948924	5.61259	5.91469	2.5643	0.000133269	0.00490132
D8674_016604	gnl|WGS:SMOL|Pdr16g010090.1	GO:0009416(response to light stimulus);GO:0009535(chloroplast thylakoid membrane);GO:0009768(photosynthesis, light harvesting in photosystem I);GO:0009941(chloroplast envelope);GO:0010287(plastoglobule);GO:0016168(chlorophyll binding);GO:0031409(pigment binding)	00196(Photosynthesis - antenna proteins)	K08908	NA	hypothetical protein DVH24_041049 [Malus domestica]	57.8399	326.701	5.64837	2.49783	0.000133872	0.00491394
D8674_013782	gnl|WGS:SMOL|Pdr15g010740.1	GO:0005524(ATP binding);GO:0005634(nucleus);GO:0006952(defense response);GO:0043130(ubiquitin binding);GO:0043531(ADP binding)	04075(Plant hormone signal transduction)	K13415	EC:2.7.10.1;EC:2.7.11.1	PREDICTED: probable disease resistance protein At5g66900 [Pyrus x bretschneideri]	1.63272	9.4094	5.76302	2.52682	0.000136585	0.00498442
D8674_031550	gnl|WGS:SMOL|Pdr7g014740.1	GO:0005634(nucleus)	NA	NA	NA	PREDICTED: ACT domain-containing protein ACR9-like [Pyrus x bretschneideri]	7.24036	40.9265	5.65254	2.4989	0.00013886	0.00504793
D8674_033767	gnl|WGS:SMOL|Pdr8g013130.1	GO:0005634(nucleus);GO:0008150(biological_process);GO:0016874(ligase activity)	NA	NA	NA	PREDICTED: uncharacterized protein LOC103962200 [Pyrus x bretschneideri]	9.91965	56.1311	5.65858	2.50044	0.000142657	0.00516879
D8674_031751	gnl|WGS:SMOL|Pdr7g016750.1	GO:0004497(monooxygenase activity);GO:0007275(multicellular organism development);GO:0010268(brassinosteroid homeostasis);GO:0016125(sterol metabolic process);GO:0016132(brassinosteroid biosynthetic process)	00905(Brassinosteroid biosynthesis)	K09588	EC:1.14.-.-	PREDICTED: cytochrome P450 90A1-like [Pyrus x bretschneideri]	5.72813	32.2993	5.63872	2.49537	0.000142733	0.00516879
D8674_015670	gnl|WGS:SMOL|Pdr16g000750.1	GO:0005737(cytoplasm)	NA	NA	NA	PREDICTED: F-box/LRR-repeat protein 20-like isoform X1 [Malus domestica]	59.4803	330.557	5.55742	2.47441	0.000151026	0.00542743
D8674_013641	gnl|WGS:SMOL|Pdr15g009330.1	GO:0003676(nucleic acid binding);GO:0003700(DNA binding transcription factor activity);GO:0005634(nucleus);GO:0008270(zinc ion binding);GO:0009640(photomorphogenesis);GO:0009738(abscisic acid-activated signaling pathway);GO:0009788(negative regulation of abscisic acid-activated signaling pathway);GO:0046872(metal ion binding)	NA	NA	NA	PREDICTED: zinc finger protein 4-like [Pyrus x bretschneideri]	2.10727	12.1013	5.74266	2.52172	0.000156919	0.0055755
D8674_034147	gnl|WGS:SMOL|Pdr8g016930.1	GO:0003674(molecular_function);GO:0005576(extracellular region);GO:0005618(cell wall);GO:0008150(biological_process);GO:0009505(plant-type cell wall)	NA	NA	NA	hypothetical protein DVH24_021060 [Malus domestica]	3.06213	17.2497	5.63322	2.49396	0.000157814	0.00559676
D8674_003432	gnl|WGS:SMOL|Pdr10g015860.1	GO:0004888(transmembrane signaling receptor activity);GO:0005525(GTP binding);GO:0009507(chloroplast);GO:0009536(plastid);GO:0009707(chloroplast outer membrane);GO:0015031(protein transport);GO:0016020(membrane);GO:0016021(integral component of membrane);GO:0016817(hydrolase activity, acting on acid anhydrides);GO:0045036(protein targeting to chloroplast);GO:0046872(metal ion binding)	NA	NA	NA	PREDICTED: translocase of chloroplast 120, chloroplastic-like [Pyrus x bretschneideri]	1.08206	6.03008	5.57278	2.4784	0.000169558	0.00594618
D8674_038247	gnl|WGS:SMOL|Pdr0g017620.1	GO:0005737(cytoplasm);GO:0005829(cytosol);GO:0008270(zinc ion binding);GO:0009809(lignin biosynthetic process);GO:0016491(oxidoreductase activity);GO:0045551(cinnamyl-alcohol dehydrogenase activity);GO:0052747(sinapyl alcohol dehydrogenase activity);GO:0055114(oxidation-reduction process)	00940(Phenylpropanoid biosynthesis)	K00083	EC:1.1.1.195	hypothetical protein DVH24_021712 [Malus domestica]	5.71717	31.4582	5.5024	2.46006	0.000175381	0.00609376
D8674_039340	gnl|WGS:SMOL|Pdr0g028550.1	GO:0009055(electron transfer activity);GO:0009416(response to light stimulus);GO:0009507(chloroplast);GO:0009570(chloroplast stroma);GO:0009643(photosynthetic acclimation);GO:0009767(photosynthetic electron transport chain);GO:0046872(metal ion binding);GO:0051537(2 iron, 2 sulfur cluster binding)	00195(Photosynthesis)	K02639	NA	hypothetical protein DVH24_016375 [Malus domestica]	56.2448	306.381	5.44728	2.44554	0.000176121	0.00610408
D8674_031582	gnl|WGS:SMOL|Pdr7g015060.1	GO:0003674(molecular_function);GO:0005634(nucleus);GO:0008150(biological_process)	NA	NA	NA	PREDICTED: uncharacterized protein LOC103948423 [Pyrus x bretschneideri]	5.38687	29.6219	5.4989	2.45914	0.000176325	0.00610408
D8674_043042	gnl|WGS:SMOL|Pdr0g065570.1	GO:0004497(monooxygenase activity);GO:0005507(copper ion binding);GO:0009409(response to cold);GO:0009507(chloroplast);GO:0009535(chloroplast thylakoid membrane);GO:0009536(plastid);GO:0009570(chloroplast stroma);GO:0009573(chloroplast ribulose bisphosphate carboxylase complex);GO:0009579(thylakoid);GO:0009637(response to blue light);GO:0009853(photorespiration);GO:0009941(chloroplast envelope);G…	00630(Glyoxylate and dicarboxylate metabolism);00710(Carbon fixation in photosynthetic organisms)	K01602	EC:4.1.1.39	PREDICTED: ribulose bisphosphate carboxylase small chain, chloroplastic-like [Pyrus x bretschneideri]	10.1998	55.8791	5.47843	2.45376	0.00017795	0.00614743
D8674_008803	gnl|WGS:SMOL|Pdr12g015110.1	GO:0003674(molecular_function);GO:0005634(nucleus);GO:0016021(integral component of membrane)	NA	NA	NA	PREDICTED: uncharacterized protein LOC103454430 [Malus domestica]	6.64896	36.3843	5.47218	2.45211	0.000179784	0.00616725
D8674_024037	gnl|WGS:SMOL|Pdr4g006100.1	GO:0005739(mitochondrion);GO:0008453(alanine-glyoxylate transaminase activity);GO:0030170(pyridoxal phosphate binding);GO:0042802(identical protein binding)	00250(Alanine, aspartate and glutamate metabolism);00260(Glycine, serine and threonine metabolism);00270(Cysteine and methionine metabolism);00280(Valine, leucine and isoleucine degradation)	K00827	EC:2.6.1.44;EC:2.6.1.40	PREDICTED: alanine--glyoxylate aminotransferase 2 homolog 2, mitochondrial-like [Pyrus x bretschneideri]	0.661932	3.85225	5.8197	2.54095	0.000181984	0.00623139
D8674_002271	gnl|WGS:SMOL|Pdr10g004250.1	GO:0005515(protein binding);GO:0005634(nucleus);GO:0005737(cytoplasm);GO:0009055(electron transfer activity);GO:0009751(response to salicylic acid);GO:0009863(salicylic acid mediated signaling pathway);GO:0009867(jasmonic acid mediated signaling pathway);GO:0015035(protein disulfide oxidoreductase activity);GO:0045454(cell redox homeostasis)	NA	NA	NA	PREDICTED: glutaredoxin-C9-like [Pyrus x bretschneideri]	3.28717	18.4128	5.60141	2.48579	0.000183684	0.00625215
D8674_031795	gnl|WGS:SMOL|Pdr7g017190.1	GO:0004864(protein phosphatase inhibitor activity);GO:0005634(nucleus);GO:0005737(cytoplasm);GO:0009738(abscisic acid-activated signaling pathway);GO:0010427(abscisic acid binding);GO:0080163(regulation of protein serine/threonine phosphatase activity)	04016(MAPK signaling pathway - plant);04075(Plant hormone signal transduction)	K14496	NA	PREDICTED: abscisic acid receptor PYL4 [Malus domestica]	4.85651	26.7934	5.51702	2.46389	0.000184046	0.00625215
D8674_015986	gnl|WGS:SMOL|Pdr16g003910.1	GO:0004672(protein kinase activity)	NA	NA	NA	PREDICTED: serine/threonine-protein kinase STN7, chloroplastic [Pyrus x bretschneideri]	12.6927	68.8451	5.424	2.43936	0.000184247	0.00625215
D8674_033143	gnl|WGS:SMOL|Pdr8g006890.2	GO:0000293(ferric-chelate reductase activity);GO:0006811(ion transport);GO:0009507(chloroplast);GO:0009767(photosynthetic electron transport chain);GO:0016020(membrane);GO:0016021(integral component of membrane);GO:0016491(oxidoreductase activity);GO:0031969(chloroplast membrane);GO:0046872(metal ion binding);GO:0055114(oxidation-reduction process)	NA	NA	NA	PREDICTED: ferric reduction oxidase 6 [Pyrus x bretschneideri]	4.4303	24.0367	5.42553	2.43976	0.00019066	0.00637774
D8674_004865	gnl|WGS:SMOL|Pdr11g001260.1	GO:0001666(response to hypoxia);GO:0003677(DNA binding);GO:0003700(DNA binding transcription factor activity);GO:0005515(protein binding);GO:0005634(nucleus);GO:0005886(plasma membrane);GO:0006351(transcription, DNA-templated);GO:0006355(regulation of transcription, DNA-templated);GO:0009873(ethylene-activated signaling pathway);GO:0043565(sequence-specific DNA binding);GO:0070483(detection of hy…	NA	NA	NA	ethylene-responsive transcription factor ERF071-like [Malus domestica]	115.337	618.875	5.36579	2.42379	0.000195925	0.00650849
D8674_028494	gnl|WGS:SMOL|Pdr6g003020.1	GO:0003674(molecular_function);GO:0005634(nucleus);GO:0005886(plasma membrane);GO:0008150(biological_process)	NA	NA	NA	PREDICTED: uncharacterized protein LOC103436902 [Malus domestica]	4.49844	24.4603	5.43752	2.44295	0.000197025	0.00652153
D8674_017123	gnl|WGS:SMOL|Pdr16g015280.1	GO:0005634(nucleus);GO:0007165(signal transduction);GO:0009734(auxin-activated signaling pathway);GO:0016021(integral component of membrane);GO:0035091(phosphatidylinositol binding)	NA	NA	NA	PREDICTED: VAN3-binding protein [Pyrus x bretschneideri]	3.52184	18.9989	5.39459	2.43151	0.000208717	0.00678943
D8674_007671	gnl|WGS:SMOL|Pdr12g003790.1	GO:0004040(amidase activity);GO:0005654(nucleoplasm);GO:0005737(cytoplasm);GO:0005829(cytosol);GO:0009684(indoleacetic acid biosynthetic process);GO:0009851(auxin biosynthetic process);GO:0016810(hydrolase activity, acting on carbon-nitrogen (but not peptide) bonds);GO:0043864(indoleacetamide hydrolase activity)	00330(Arginine and proline metabolism);00360(Phenylalanine metabolism);00380(Tryptophan metabolism)	K01426	EC:3.5.1.4	PREDICTED: amidase 1-like [Pyrus x bretschneideri]	14.9114	79.4753	5.32983	2.41409	0.000210484	0.00682337
D8674_001243	gnl|WGS:SMOL|Pdr1g012430.1	GO:0005515(protein binding);GO:0005737(cytoplasm);GO:0009408(response to heat);GO:0009644(response to high light intensity);GO:0010286(heat acclimation);GO:0042542(response to hydrogen peroxide)	04141(Protein processing in endoplasmic reticulum)	K13993	NA	hypothetical protein DVH24_023013 [Malus domestica]	0.900484	5.14989	5.71903	2.51577	0.000212413	0.0068741
D8674_025497	gnl|WGS:SMOL|Pdr4g020700.1	GO:0009813(flavonoid biosynthetic process);GO:0043231(intracellular membrane-bounded organelle);GO:0052696(flavonoid glucuronidation);GO:0080043(quercetin 3-O-glucosyltransferase activity);GO:0080044(quercetin 7-O-glucosyltransferase activity)	NA	NA	NA	UDP-glucose:flavonoid 7-O-glucosyltransferase [Pyrus communis]	3.56349	19.0646	5.34999	2.41954	0.000221353	0.00709045
D8674_022846	gnl|WGS:SMOL|Pdr3g016460.1	GO:0004842(ubiquitin-protein transferase activity);GO:0005515(protein binding);GO:0005634(nucleus);GO:0009585(red, far-red light phototransduction);GO:0010099(regulation of photomorphogenesis);GO:0016567(protein ubiquitination);GO:0048366(leaf development);GO:0048573(photoperiodism, flowering)	NA	NA	NA	PREDICTED: phytochrome A-associated F-box protein-like [Malus domestica]	80.9469	427.184	5.27734	2.39981	0.000222354	0.00711042
D8674_041247	gnl|WGS:SMOL|Pdr0g047620.1	GO:0005575(cellular_component);GO:0008150(biological_process)	NA	NA	NA	PREDICTED: uncharacterized protein LOC103961719 [Pyrus x bretschneideri]	1.84024	9.81778	5.33504	2.4155	0.000225962	0.00718924
D8674_018888	gnl|WGS:SMOL|Pdr17g008180.1	GO:0005509(calcium ion binding);GO:0008266(poly(U) RNA binding);GO:0009507(chloroplast);GO:0009534(chloroplast thylakoid);GO:0009535(chloroplast thylakoid membrane);GO:0009543(chloroplast thylakoid lumen);GO:0009570(chloroplast stroma);GO:0009579(thylakoid);GO:0009654(photosystem II oxygen evolving complex);GO:0009941(chloroplast envelope);GO:0019684(photosynthesis, light reaction);GO:0019898(ext…	00195(Photosynthesis)	K02717	NA	PREDICTED: oxygen-evolving enhancer protein 2, chloroplastic-like [Pyrus x bretschneideri]	79.6355	416.686	5.23241	2.38748	0.000236489	0.00742332
D8674_001385	gnl|WGS:SMOL|Pdr1g013850.1	GO:0003677(DNA binding);GO:0003700(DNA binding transcription factor activity);GO:0005634(nucleus);GO:0005643(nuclear pore);GO:0006351(transcription, DNA-templated);GO:0006355(regulation of transcription, DNA-templated);GO:0006952(defense response);GO:0009873(ethylene-activated signaling pathway);GO:0010087(phloem or xylem histogenesis);GO:0010200(response to chitin);GO:0045893(positive regulation…	NA	NA	NA	PREDICTED: ethylene-responsive transcription factor 1-like [Pyrus x bretschneideri]	0.743253	4.27032	5.74545	2.52242	0.00023842	0.00744746
D8674_037203	gnl|WGS:SMOL|Pdr0g007180.1	GO:0005783(endoplasmic reticulum);GO:0005789(endoplasmic reticulum membrane);GO:0009507(chloroplast);GO:0009793(embryo development ending in seed dormancy);GO:0016020(membrane);GO:0016021(integral component of membrane);GO:0016491(oxidoreductase activity);GO:0018454(acetoacetyl-CoA reductase activity);GO:0042335(cuticle development);GO:0042761(very long-chain fatty acid biosynthetic process);GO:0…	00062(Fatty acid elongation);01040(Biosynthesis of unsaturated fatty acids)	K10251	EC:1.1.1.62;EC:1.1.1.330	PREDICTED: very-long-chain 3-oxoacyl-CoA reductase 1-like [Malus domestica]	1.09156	6.05682	5.54879	2.47217	0.000246857	0.00767291
D8674_012562	gnl|WGS:SMOL|Pdr14g017990.1	GO:0006952(defense response);GO:0008270(zinc ion binding);GO:0010200(response to chitin);GO:0016021(integral component of membrane);GO:0046872(metal ion binding)	NA	NA	NA	PREDICTED: NEP1-interacting protein-like 2 isoform X1 [Pyrus x bretschneideri]	37.1366	193.295	5.20498	2.37989	0.000248093	0.00769864
D8674_036046	gnl|WGS:SMOL|Pdr9g015050.1	GO:0005794(Golgi apparatus);GO:0016413(O-acetyltransferase activity);GO:0071554(cell wall organization or biogenesis)	NA	NA	NA	PREDICTED: protein trichome birefringence-like 19 [Pyrus x bretschneideri]	18.7581	97.425	5.19376	2.37678	0.00025156	0.0077552
D8674_011531	gnl|WGS:SMOL|Pdr14g007680.1	GO:0005634(nucleus);GO:0009055(electron transfer activity);GO:0015035(protein disulfide oxidoreductase activity);GO:0045454(cell redox homeostasis)	NA	NA	NA	hypothetical protein DVH24_019705 [Malus domestica]	0.786528	4.35724	5.53984	2.46984	0.000258915	0.007943
D8674_004039	gnl|WGS:SMOL|Pdr10g021930.1	GO:0005515(protein binding);GO:0005739(mitochondrion);GO:0009536(plastid);GO:0031359(integral component of chloroplast outer membrane);GO:0043572(plastid fission)	NA	NA	NA	PREDICTED: plastid division protein PDV2-like [Fragaria vesca subsp. vesca]	6.96958	36.3388	5.21391	2.38237	0.000259473	0.0079472
D8674_009883	gnl|WGS:SMOL|Pdr13g005630.1	GO:0005515(protein binding)	00195(Photosynthesis)	K02692	NA	PREDICTED: photosystem I reaction center subunit II, chloroplastic-like [Pyrus x bretschneideri]	56.3419	289.692	5.14168	2.36224	0.000270047	0.00821772
D8674_009115	gnl|WGS:SMOL|Pdr12g018230.1	NA	00500(Starch and sucrose metabolism);00460(Cyanoamino acid metabolism);00940(Phenylpropanoid biosynthesis)	K01188	EC:3.2.1.21	PREDICTED: uncharacterized protein LOC103944907 [Pyrus x bretschneideri]	1.49956	7.97471	5.31802	2.41089	0.000276401	0.00838402
D8674_017846	gnl|WGS:SMOL|Pdr16g022510.1	GO:0004849(uridine kinase activity);GO:0005829(cytosol);GO:0006206(pyrimidine nucleobase metabolic process);GO:0009507(chloroplast);GO:0043097(pyrimidine nucleoside salvage)	00710(Carbon fixation in photosynthetic organisms)	K00855	EC:2.7.1.19	PREDICTED: phosphoribulokinase, chloroplastic-like [Pyrus x bretschneideri]	1.40668	7.49385	5.32733	2.41341	0.000284181	0.00855126
D8674_005754	gnl|WGS:SMOL|Pdr11g010150.1	GO:0003674(molecular_function);GO:0005634(nucleus);GO:0008150(biological_process)	NA	NA	NA	PREDICTED: uncharacterized protein LOC103926998 [Pyrus x bretschneideri]	0.87792	4.86314	5.53939	2.46973	0.000288377	0.00866371
D8674_007672	gnl|WGS:SMOL|Pdr12g003800.1	GO:0004040(amidase activity);GO:0005654(nucleoplasm);GO:0005737(cytoplasm);GO:0005829(cytosol);GO:0009684(indoleacetic acid biosynthetic process);GO:0009851(auxin biosynthetic process);GO:0016810(hydrolase activity, acting on carbon-nitrogen (but not peptide) bonds);GO:0043864(indoleacetamide hydrolase activity)	00330(Arginine and proline metabolism);00360(Phenylalanine metabolism);00380(Tryptophan metabolism)	K01426	EC:3.5.1.4	PREDICTED: amidase 1-like [Pyrus x bretschneideri]	27.4908	139.056	5.05826	2.33864	0.000305946	0.00907592
D8674_013242	gnl|WGS:SMOL|Pdr15g005340.1	NA	NA	NA	NA	hypothetical protein DVH24_039374 [Malus domestica]	52.041	262.453	5.04319	2.33434	0.000312483	0.00921726
D8674_039682	gnl|WGS:SMOL|Pdr0g031970.1	GO:0004838(L-tyrosine:2-oxoglutarate aminotransferase activity);GO:0005737(cytoplasm);GO:0005829(cytosol);GO:0006555(methionine metabolic process);GO:0006558(L-phenylalanine metabolic process);GO:0006568(tryptophan metabolic process);GO:0006569(tryptophan catabolic process);GO:0006570(tyrosine metabolic process);GO:0008483(transaminase activity);GO:0009072(aromatic amino acid family metabolic pro…	NA	NA	NA	PREDICTED: uncharacterized protein LOC103931295 [Pyrus x bretschneideri]	8.39642	42.5631	5.0692	2.34176	0.000313153	0.00921726
D8674_012310	gnl|WGS:SMOL|Pdr14g015470.1	GO:0000028(ribosomal small subunit assembly);GO:0000462(maturation of SSU-rRNA from tricistronic rRNA transcript (SSU-rRNA, 5.8S rRNA, LSU-rRNA));GO:0030515(snoRNA binding);GO:0032040(small-subunit processome);GO:0034388(Pwp2p-containing subcomplex of 90S preribosome)	NA	NA	NA	hypothetical protein DVH24_039776 [Malus domestica]	1.56899	8.47452	5.40125	2.43329	0.000317976	0.00934462
D8674_026885	gnl|WGS:SMOL|Pdr5g013610.1	GO:0003333(amino acid transmembrane transport);GO:0015171(amino acid transmembrane transporter activity)	NA	NA	NA	PREDICTED: lysine histidine transporter-like 8 [Pyrus x bretschneideri]	1.00693	5.32275	5.28612	2.40221	0.000320859	0.0093718
D8674_030334	gnl|WGS:SMOL|Pdr7g002580.3	GO:0004843(thiol-dependent ubiquitin-specific protease activity);GO:0005515(protein binding);GO:0005634(nucleus);GO:0005737(cytoplasm);GO:0005829(cytosol);GO:0006511(ubiquitin-dependent protein catabolic process);GO:0009867(jasmonic acid mediated signaling pathway);GO:0016579(protein deubiquitination);GO:0036459(thiol-dependent ubiquitinyl hydrolase activity)	NA	NA	NA	hypothetical protein DVH24_015840 [Malus domestica]	14.4362	71.9146	4.98154	2.31659	0.000341914	0.00992446
D8674_028875	gnl|WGS:SMOL|Pdr6g006830.1	GO:0005515(protein binding);GO:0009507(chloroplast);GO:0009534(chloroplast thylakoid);GO:0009535(chloroplast thylakoid membrane);GO:0009579(thylakoid);GO:0009773(photosynthetic electron transport in photosystem I);GO:0015979(photosynthesis);GO:0016021(integral component of membrane);GO:0016730(oxidoreductase activity, acting on iron-sulfur proteins as donors);GO:0042802(identical protein binding)	NA	NA	NA	PREDICTED: PGR5-like protein 1A, chloroplastic [Pyrus x bretschneideri]	1.4386	7.56759	5.26037	2.39516	0.000350133	0.0101009
D8674_030337	gnl|WGS:SMOL|Pdr7g002610.1	NA	NA	NA	NA	hypothetical protein DVH24_015838 [Malus domestica]	6.07503	31.0854	5.11691	2.35527	0.00035289	0.0101494
D8674_016327	gnl|WGS:SMOL|Pdr16g007320.1	GO:0009813(flavonoid biosynthetic process);GO:0043231(intracellular membrane-bounded organelle);GO:0052696(flavonoid glucuronidation);GO:0080043(quercetin 3-O-glucosyltransferase activity);GO:0080044(quercetin 7-O-glucosyltransferase activity)	00380(Tryptophan metabolism);00966(Glucosinolate biosynthesis)	K11820	EC:2.4.1.195	hypothetical protein DVH24_007067 [Malus domestica]	17.1156	84.9047	4.96065	2.31053	0.000355463	0.0101923
D8674_003133	gnl|WGS:SMOL|Pdr10g012870.1	NA	NA	NA	NA	PREDICTED: uncharacterized protein LOC103942927 [Pyrus x bretschneideri]	12.8098	65.0034	5.07453	2.34327	0.000361479	0.0103022
D8674_032308	gnl|WGS:SMOL|Pdr7g022320.1	GO:0004033(aldo-keto reductase (NADP) activity);GO:0009443(pyridoxal 5'-phosphate salvage);GO:0009507(chloroplast);GO:0042820(vitamin B6 catabolic process);GO:0042821(pyridoxal biosynthetic process);GO:0050236(pyridoxine:NADP 4-dehydrogenase activity);GO:0055114(oxidation-reduction process);GO:0070402(NADPH binding)	00750(Vitamin B6 metabolism)	K05275	EC:1.1.1.65	PREDICTED: pyridoxal reductase, chloroplastic isoform X1 [Malus domestica]	2.25746	11.5043	5.0961	2.34939	0.000367444	0.0103937
D8674_011680	gnl|WGS:SMOL|Pdr14g009170.1	GO:0000209(protein polyubiquitination);GO:0005634(nucleus);GO:0005737(cytoplasm);GO:0006511(ubiquitin-dependent protein catabolic process);GO:0031625(ubiquitin protein ligase binding);GO:0061630(ubiquitin protein ligase activity)	04120(Ubiquitin mediated proteolysis)	K10583	EC:2.3.2.23	PREDICTED: ubiquitin-conjugating enzyme E2 22-like isoform X1 [Pyrus x bretschneideri]	1.03654	5.44518	5.25325	2.39321	0.000377902	0.0106575
D8674_031877	gnl|WGS:SMOL|Pdr7g018010.1	GO:0005739(mitochondrion);GO:0008080(N-acetyltransferase activity)	NA	NA	NA	PREDICTED: uncharacterized protein LOC103953714 [Pyrus x bretschneideri]	3.19863	16.132	5.0434	2.3344	0.0003847	0.0107831
D8674_024366	gnl|WGS:SMOL|Pdr4g009390.1	GO:0003674(molecular_function);GO:0005886(plasma membrane);GO:0008150(biological_process);GO:0016021(integral component of membrane)	NA	NA	NA	PREDICTED: UNC93-like protein 3 [Malus domestica]	4.66811	23.1252	4.95387	2.30856	0.000386797	0.0108114
D8674_000833	gnl|WGS:SMOL|Pdr1g008330.1	GO:0000156(phosphorelay response regulator activity);GO:0000160(phosphorelay signal transduction system);GO:0003677(DNA binding);GO:0005515(protein binding);GO:0005634(nucleus);GO:0006351(transcription, DNA-templated);GO:0006355(regulation of transcription, DNA-templated);GO:0007623(circadian rhythm);GO:0009266(response to temperature stimulus);GO:0010017(red or far-red light signaling pathway);G…	04712(Circadian rhythm - plant)	K12130	NA	hypothetical protein DVH24_005391 [Malus domestica]	8.49553	41.5882	4.8953	2.2914	0.000389992	0.0108513
D8674_042283	gnl|WGS:SMOL|Pdr0g057980.1	GO:0009416(response to light stimulus);GO:0009535(chloroplast thylakoid membrane);GO:0009768(photosynthesis, light harvesting in photosystem I);GO:0009941(chloroplast envelope);GO:0010287(plastoglobule);GO:0016168(chlorophyll binding);GO:0031409(pigment binding)	00196(Photosynthesis - antenna proteins)	K08917	NA	PREDICTED: chlorophyll a-b binding protein CP24 10A, chloroplastic-like [Pyrus x bretschneideri]	50.47	246.789	4.88981	2.28978	0.000391272	0.0108548
D8674_035461	gnl|WGS:SMOL|Pdr9g009200.1	GO:0005634(nucleus);GO:0008150(biological_process);GO:0008483(transaminase activity)	NA	NA	NA	PREDICTED: uncharacterized protein LOC103443629 isoform X1 [Malus domestica]	1.43692	7.62157	5.30409	2.40711	0.000394934	0.0109095
D8674_032819	gnl|WGS:SMOL|Pdr8g003650.1	GO:0004867(serine-type endopeptidase inhibitor activity);GO:0005615(extracellular space)	03013(RNA transport)	K14297	NA	PREDICTED: serpin-ZX-like [Pyrus x bretschneideri]	4.36378	21.9405	5.02787	2.32995	0.000397844	0.0109739
D8674_018572	gnl|WGS:SMOL|Pdr17g005020.1	GO:0003674(molecular_function);GO:0005634(nucleus);GO:0009611(response to wounding)	NA	NA	NA	hypothetical protein DVH24_028273 [Malus domestica]	106.498	519.297	4.87613	2.28574	0.000401018	0.0110453
D8674_042441	gnl|WGS:SMOL|Pdr0g059560.1	GO:0005737(cytoplasm);GO:0005829(cytosol);GO:0006457(protein folding);GO:0009507(chloroplast);GO:0009535(chloroplast thylakoid membrane);GO:0010598(NAD(P)H dehydrogenase complex (plastoquinone));GO:0016021(integral component of membrane);GO:0016491(oxidoreductase activity);GO:0048038(quinone binding);GO:0055114(oxidation-reduction process)	NA	NA	NA	PREDICTED: NAD(P)H-quinone oxidoreductase subunit T, chloroplastic-like [Pyrus x bretschneideri]	1.68141	8.52755	5.07167	2.34246	0.000409978	0.0112632
D8674_024134	gnl|WGS:SMOL|Pdr4g007070.1	GO:0009416(response to light stimulus);GO:0009535(chloroplast thylakoid membrane);GO:0009768(photosynthesis, light harvesting in photosystem I);GO:0009941(chloroplast envelope);GO:0010287(plastoglobule);GO:0016168(chlorophyll binding);GO:0031409(pigment binding)	00196(Photosynthesis - antenna proteins)	K08915	NA	hypothetical protein DVH24_036126 [Malus domestica]	34.1176	165.281	4.84446	2.27634	0.000416636	0.0114087
D8674_008536	gnl|WGS:SMOL|Pdr12g012440.1	GO:0003674(molecular_function);GO:0005634(nucleus);GO:0008150(biological_process)	00562(Inositol phosphate metabolism);04070(Phosphatidylinositol signaling system)	K18081	EC:3.1.3.64;EC:3.1.3.95	PREDICTED: uncharacterized protein LOC103927660 [Pyrus x bretschneideri]	1.92252	9.47996	4.93101	2.30188	0.000423087	0.0115519
D8674_005346	gnl|WGS:SMOL|Pdr11g006070.1	NA	04626(Plant-pathogen interaction)	K13465	EC:3.2.1.8	PREDICTED: receptor-like protein 2 [Malus domestica]	3.82128	18.6011	4.86775	2.28326	0.000428632	0.0116527
D8674_036070	gnl|WGS:SMOL|Pdr9g015290.1	GO:0004497(monooxygenase activity);GO:0007275(multicellular organism development);GO:0010268(brassinosteroid homeostasis);GO:0016125(sterol metabolic process);GO:0016132(brassinosteroid biosynthetic process)	00905(Brassinosteroid biosynthesis)	K09590	EC:1.14.-.-	PREDICTED: cytochrome P450 85A [Malus domestica]	4.15703	20.245	4.87007	2.28394	0.000432241	0.0116704
D8674_024669	gnl|WGS:SMOL|Pdr4g012420.1	GO:0003677(DNA binding);GO:0003700(DNA binding transcription factor activity);GO:0005515(protein binding);GO:0005634(nucleus);GO:0007275(multicellular organism development);GO:0009909(regulation of flower development);GO:0009933(meristem structural organization);GO:0009944(polarity specification of adaxial/abaxial axis);GO:0010093(specification of floral organ identity);GO:0010154(fruit developme…	NA	NA	NA	PREDICTED: axial regulator YABBY 1-like [Pyrus x bretschneideri]	5.18156	25.7041	4.96069	2.31054	0.000432373	0.0116704
D8674_025567	gnl|WGS:SMOL|Pdr5g000430.1	GO:0009416(response to light stimulus);GO:0009535(chloroplast thylakoid membrane);GO:0009768(photosynthesis, light harvesting in photosystem I);GO:0009941(chloroplast envelope);GO:0010287(plastoglobule);GO:0016168(chlorophyll binding);GO:0031409(pigment binding)	00196(Photosynthesis - antenna proteins)	K08916	NA	chlorophyll a-b binding protein CP26, chloroplastic-like [Pyrus x bretschneideri]	46.9983	225.561	4.79934	2.26283	0.000443728	0.0118918
D8674_018461	gnl|WGS:SMOL|Pdr17g003910.1	GO:0003674(molecular_function);GO:0005739(mitochondrion);GO:0008150(biological_process)	NA	NA	NA	hypothetical protein DVH24_028393 [Malus domestica]	9.81442	47.5136	4.8412	2.27536	0.000449345	0.0119406
D8674_032329	gnl|WGS:SMOL|Pdr7g022530.1	GO:0006952(defense response);GO:0009506(plasmodesma);GO:0046658(anchored component of plasma membrane)	NA	NA	NA	PREDICTED: NDR1/HIN1-like protein 12 [Pyrus x bretschneideri]	1.86184	9.23039	4.95766	2.30966	0.000454715	0.0120662
D8674_013159	gnl|WGS:SMOL|Pdr15g004510.1	GO:0005198(structural molecule activity);GO:0005515(protein binding);GO:0008150(biological_process);GO:0009507(chloroplast);GO:0009570(chloroplast stroma);GO:0010236(plastoquinone biosynthetic process)	NA	NA	NA	PREDICTED: probable plastid-lipid-associated protein 7, chloroplastic [Pyrus x bretschneideri]	0.846048	4.26004	5.03522	2.33206	0.000456741	0.0120761
D8674_013451	gnl|WGS:SMOL|Pdr15g007430.1	GO:0005737(cytoplasm);GO:0008270(zinc ion binding);GO:0009617(response to bacterium);GO:0009626(plant-type hypersensitive response);GO:0009809(lignin biosynthetic process);GO:0045551(cinnamyl-alcohol dehydrogenase activity);GO:0052747(sinapyl alcohol dehydrogenase activity);GO:0055114(oxidation-reduction process)	00940(Phenylpropanoid biosynthesis)	K00083	EC:1.1.1.195	PREDICTED: probable mannitol dehydrogenase [Pyrus x bretschneideri]	5.45989	26.266	4.81072	2.26625	0.000468372	0.0123261
D8674_002101	gnl|WGS:SMOL|Pdr10g002550.1	GO:0004674(protein serine/threonine kinase activity);GO:0005886(plasma membrane);GO:0006468(protein phosphorylation);GO:0006952(defense response);GO:0009506(plasmodesma)	NA	NA	NA	PREDICTED: G-type lectin S-receptor-like serine/threonine-protein kinase At1g11410 [Malus domestica]	1.13785	5.64622	4.96219	2.31098	0.000472244	0.0123766
D8674_026768	gnl|WGS:SMOL|Pdr5g012440.1	GO:0005829(cytosol);GO:0016618(hydroxypyruvate reductase activity);GO:0030267(glyoxylate reductase (NADP) activity)	00630(Glyoxylate and dicarboxylate metabolism);00260(Glycine, serine and threonine metabolism)	K15893	NA	glycerate dehydrogenase [Pyrus x bretschneideri]	13.3759	63.779	4.7682	2.25344	0.000472316	0.0123766
D8674_039893	gnl|WGS:SMOL|Pdr0g034080.1	GO:0003676(nucleic acid binding);GO:0005634(nucleus);GO:0006397(mRNA processing)	NA	NA	NA	PREDICTED: RNA-binding protein 39-like [Malus domestica]	2.50949	12.0398	4.79771	2.26235	0.000489273	0.0127341
D8674_036303	gnl|WGS:SMOL|Pdr9g017620.1	GO:0005737(cytoplasm);GO:0006952(defense response);GO:0007165(signal transduction);GO:0043531(ADP binding)	NA	NA	NA	PREDICTED: TMV resistance protein N-like isoform X1 [Pyrus x bretschneideri]	30.651	145.9	4.76005	2.25098	0.000489331	0.0127341
D8674_005542	gnl|WGS:SMOL|Pdr11g008030.1	GO:0008150(biological_process);GO:0009507(chloroplast)	NA	NA	NA	PREDICTED: uncharacterized protein LOC103946558 [Pyrus x bretschneideri]	0.968478	4.97924	5.1413	2.36213	0.000494188	0.0128251
D8674_023843	gnl|WGS:SMOL|Pdr4g004160.1	GO:0005509(calcium ion binding);GO:0005515(protein binding);GO:0009507(chloroplast);GO:0009535(chloroplast thylakoid membrane);GO:0009543(chloroplast thylakoid lumen);GO:0009570(chloroplast stroma);GO:0009579(thylakoid);GO:0009654(photosystem II oxygen evolving complex);GO:0016020(membrane);GO:0019898(extrinsic component of membrane);GO:0030095(chloroplast photosystem II);GO:0031977(thylakoid lum…	NA	NA	NA	PREDICTED: psbP domain-containing protein 1, chloroplastic-like isoform X2 [Pyrus x bretschneideri]	2.17343	10.8167	4.9768	2.31522	0.000502489	0.0130047
D8674_014826	gnl|WGS:SMOL|Pdr15g021180.1	GO:0003674(molecular_function);GO:0005575(cellular_component);GO:0008150(biological_process)	NA	NA	NA	PREDICTED: uncharacterized protein LOC103946835 [Pyrus x bretschneideri]	0.764039	3.80268	4.97707	2.3153	0.000504415	0.0130367
D8674_031675	gnl|WGS:SMOL|Pdr7g015990.1	GO:0005507(copper ion binding);GO:0009809(lignin biosynthetic process);GO:0016722(oxidoreductase activity, oxidizing metal ions)	NA	NA	NA	PREDICTED: laccase-4-like [Pyrus x bretschneideri]	2.88936	13.725	4.75018	2.24798	0.000512887	0.0131609
D8674_013848	gnl|WGS:SMOL|Pdr15g011400.1	GO:0003677(DNA binding);GO:0003700(DNA binding transcription factor activity);GO:0005634(nucleus);GO:0006351(transcription, DNA-templated);GO:0006355(regulation of transcription, DNA-templated);GO:0009965(leaf morphogenesis)	NA	NA	NA	hypothetical protein DVH24_029940 [Malus domestica]	3.88535	18.3944	4.73431	2.24315	0.000516966	0.0132075
D8674_013766	gnl|WGS:SMOL|Pdr15g010580.1	GO:0003677(DNA binding);GO:0003700(DNA binding transcription factor activity);GO:0005634(nucleus);GO:0005829(cytosol);GO:0006355(regulation of transcription, DNA-templated);GO:0010629(negative regulation of gene expression);GO:0044212(transcription regulatory region DNA binding);GO:0048449(floral organ formation);GO:0090701(specification of plant organ identity)	04075(Plant hormone signal transduction)	K14491	NA	PREDICTED: myb family transcription factor EFM-like isoform X1 [Pyrus x bretschneideri]	1.12201	5.51295	4.91346	2.29674	0.000518679	0.0132242
D8674_025748	gnl|WGS:SMOL|Pdr5g002240.1	GO:0004004(ATP-dependent RNA helicase activity);GO:0005634(nucleus);GO:0005737(cytoplasm);GO:0006396(RNA processing)	NA	NA	NA	hypothetical protein DVH24_030329 [Malus domestica]	0.571247	2.75885	4.82953	2.27188	0.00052196	0.0132899
D8674_039529	gnl|WGS:SMOL|Pdr0g030440.2	GO:0004467(long-chain fatty acid-CoA ligase activity);GO:0005524(ATP binding);GO:0005634(nucleus);GO:0005794(Golgi apparatus);GO:0005829(cytosol);GO:0005886(plasma membrane);GO:0006631(fatty acid metabolic process);GO:0006633(fatty acid biosynthetic process);GO:0102391(decanoate-CoA ligase activity)	00061(Fatty acid biosynthesis);00071(Fatty acid degradation);04146(Peroxisome)	K01897	EC:6.2.1.3	PREDICTED: long chain acyl-CoA synthetase 4-like [Pyrus x bretschneideri]	5.53757	26.109	4.7149	2.23723	0.000525325	0.0132976
D8674_001751	gnl|WGS:SMOL|Pdr1g017510.1	GO:0006952(defense response);GO:0009506(plasmodesma);GO:0046658(anchored component of plasma membrane)	NA	NA	NA	PREDICTED: NDR1/HIN1-like protein 12 [Pyrus x bretschneideri]	1.74374	8.50458	4.87722	2.28606	0.000526629	0.0133011
D8674_030000	gnl|WGS:SMOL|Pdr6g018080.1	GO:0006869(lipid transport);GO:0042626(ATPase activity, coupled to transmembrane movement of substances);GO:0043231(intracellular membrane-bounded organelle)	02010(ABC transporters)	K05643	NA	PREDICTED: ABC transporter A family member 10-like [Malus domestica]	2.45084	11.5951	4.73107	2.24217	0.00053954	0.0135546
D8674_035542	gnl|WGS:SMOL|Pdr9g010010.1	GO:0003674(molecular_function);GO:0008150(biological_process);GO:0009507(chloroplast);GO:0009536(plastid)	NA	NA	NA	PREDICTED: uncharacterized protein LOC103967669 [Pyrus x bretschneideri]	1.0198	5.11917	5.01977	2.32762	0.000543009	0.0135894
D8674_017201	gnl|WGS:SMOL|Pdr16g016060.1	NA	NA	NA	NA	hypothetical protein DVH24_006989 [Malus domestica]	12.1395	57.2046	4.71226	2.23642	0.000553894	0.0138415
D8674_030473	gnl|WGS:SMOL|Pdr7g003970.1	GO:0005886(plasma membrane)	NA	NA	NA	PREDICTED: rust resistance kinase Lr10-like [Pyrus x bretschneideri]	0.880036	4.32906	4.91918	2.29842	0.000556254	0.0138821
D8674_035784	gnl|WGS:SMOL|Pdr9g012430.1	GO:0003677(DNA binding);GO:0003723(RNA binding);GO:0004518(nuclease activity);GO:0005634(nucleus);GO:0008150(biological_process);GO:0046872(metal ion binding)	NA	NA	NA	PREDICTED: zinc finger CCCH domain-containing protein 18-like isoform X1 [Pyrus x bretschneideri]	12.4882	57.8539	4.6327	2.21185	0.000575394	0.0141719
D8674_028776	gnl|WGS:SMOL|Pdr6g005840.1	GO:0001228(transcriptional activator activity, RNA polymerase II transcription regulatory region sequence-specific DNA binding);GO:0005634(nucleus);GO:0005737(cytoplasm);GO:0006351(transcription, DNA-templated);GO:0010584(pollen exine formation);GO:0043565(sequence-specific DNA binding)	NA	NA	NA	hypothetical protein DVH24_035990 [Malus domestica]	3.21617	15.1915	4.72348	2.23985	0.000576196	0.0141719
D8674_026292	gnl|WGS:SMOL|Pdr5g007680.1	GO:0009496(plastoquinol--plastocyanin reductase activity);GO:0009507(chloroplast);GO:0009512(cytochrome b6f complex);GO:0009535(chloroplast thylakoid membrane);GO:0016021(integral component of membrane)	NA	NA	NA	PREDICTED: cytochrome b6-f complex subunit 7, chloroplastic [Pyrus x bretschneideri]	5.85244	27.6851	4.73052	2.242	0.00057815	0.0141846
D8674_036915	gnl|WGS:SMOL|Pdr0g004300.1	GO:0004497(monooxygenase activity)	00905(Brassinosteroid biosynthesis)	K15639	EC:1.14.-.-	PREDICTED: cytochrome P450 CYP749A22-like [Pyrus x bretschneideri]	0.81165	4.00571	4.93527	2.30313	0.000580041	0.0142125
D8674_033135	gnl|WGS:SMOL|Pdr8g006810.1	GO:0016787(hydrolase activity)	NA	NA	NA	hypothetical protein DVH24_020020 [Malus domestica]	1.43346	6.90225	4.81511	2.26757	0.000587157	0.014331
D8674_039869	gnl|WGS:SMOL|Pdr0g033840.1	GO:0051213(dioxygenase activity)	00941(Flavonoid biosynthesis)	K05278	EC:1.14.20.6	PREDICTED: protein SRG1-like [Pyrus x bretschneideri]	2.76167	13.0919	4.74057	2.24506	0.000590425	0.0143922
D8674_032265	gnl|WGS:SMOL|Pdr7g021890.1	GO:0005737(cytoplasm);GO:0006537(glutamate biosynthetic process);GO:0015930(glutamate synthase activity);GO:0019676(ammonia assimilation cycle)	00910(Nitrogen metabolism);00250(Alanine, aspartate and glutamate metabolism)	K00264	EC:1.4.1.13;EC:1.4.1.14	PREDICTED: glutamate synthase [NADH], amyloplastic isoform X1 [Pyrus x bretschneideri]	0.756254	3.54645	4.68949	2.22943	0.000593431	0.0144096
D8674_030785	gnl|WGS:SMOL|Pdr7g007090.1	GO:0003677(DNA binding);GO:0005515(protein binding);GO:0005634(nucleus);GO:0006351(transcription, DNA-templated);GO:0006355(regulation of transcription, DNA-templated);GO:0010167(response to nitrate);GO:0015706(nitrate transport);GO:0071249(cellular response to nitrate);GO:0071705(nitrogen compound transport);GO:1901698(response to nitrogen compound)	03050(Proteasome)	K03029	NA	PREDICTED: uncharacterized protein LOC103962259 [Pyrus x bretschneideri]	0.816729	3.87843	4.74873	2.24754	0.000599712	0.0145434
D8674_016571	gnl|WGS:SMOL|Pdr16g009760.1	GO:0016020(membrane);GO:0016709(oxidoreductase activity, acting on paired donors, with incorporation or reduction of molecular oxygen, NAD(P)H as one donor, and incorporation of one atom of oxygen);GO:0044550(secondary metabolite biosynthetic process)	NA	NA	NA	PREDICTED: geraniol 8-hydroxylase-like isoform X1 [Pyrus x bretschneideri]	4.35489	20.2353	4.64658	2.21617	0.000606022	0.0146518
D8674_005491	gnl|WGS:SMOL|Pdr11g007520.1	GO:0003674(molecular_function);GO:0005575(cellular_component);GO:0008150(biological_process)	NA	NA	NA	PREDICTED: uncharacterized protein LOC103941543 [Pyrus x bretschneideri]	3.69965	17.4672	4.7213	2.23919	0.000608663	0.014685
D8674_035818	gnl|WGS:SMOL|Pdr9g012770.1	NA	NA	NA	NA	PREDICTED: zinc metalloprotease ZmpB-like [Malus domestica]	8.91297	40.9716	4.59685	2.20064	0.000639755	0.0153034
D8674_013223	gnl|WGS:SMOL|Pdr15g005150.1	GO:0000287(magnesium ion binding);GO:0004765(shikimate kinase activity);GO:0009073(aromatic amino acid family biosynthetic process);GO:0019632(shikimate metabolic process)	00400(Phenylalanine, tyrosine and tryptophan biosynthesis)	K00891	EC:2.7.1.71	PREDICTED: shikimate kinase, chloroplastic-like [Pyrus x bretschneideri]	7.93472	36.4182	4.58973	2.19841	0.000639975	0.0153034
D8674_015386	gnl|WGS:SMOL|Pdr15g026780.1	GO:0003755(peptidyl-prolyl cis-trans isomerase activity);GO:0005528(FK506 binding);GO:0005789(endoplasmic reticulum membrane);GO:0061077(chaperone-mediated protein folding)	NA	NA	NA	hypothetical protein DVH24_012574 [Malus domestica]	67.0337	303.808	4.53217	2.1802	0.000663967	0.0157772
D8674_041905	gnl|WGS:SMOL|Pdr0g054200.1	GO:0005509(calcium ion binding);GO:0009507(chloroplast);GO:0009543(chloroplast thylakoid lumen);GO:0009579(thylakoid);GO:0009654(photosystem II oxygen evolving complex);GO:0015979(photosynthesis);GO:0019898(extrinsic component of membrane)	NA	NA	NA	hypothetical protein DVH24_023355 [Malus domestica]	0.782068	3.81053	4.87237	2.28462	0.000667369	0.0158381
D8674_000635	gnl|WGS:SMOL|Pdr1g006350.1	GO:0005773(vacuole);GO:0005887(integral component of plasma membrane);GO:0009506(plasmodesma);GO:0009992(cellular water homeostasis);GO:0015250(water channel activity);GO:0015254(glycerol channel activity);GO:0034220(ion transmembrane transport)	NA	NA	NA	PREDICTED: aquaporin PIP1-1-like isoform X1 [Pyrus x bretschneideri]	611.563	2767.15	4.52471	2.17783	0.000670296	0.0158729
D8674_040203	gnl|WGS:SMOL|Pdr0g037180.1	GO:0003674(molecular_function);GO:0005634(nucleus);GO:0006351(transcription, DNA-templated);GO:0006355(regulation of transcription, DNA-templated);GO:0048511(rhythmic process)	NA	NA	NA	PREDICTED: protein LNK2-like isoform X1 [Pyrus x bretschneideri]	1.66753	7.76002	4.6536	2.21835	0.000670521	0.0158729
D8674_036642	gnl|WGS:SMOL|Pdr0g001570.1	GO:0003674(molecular_function);GO:0005622(intracellular);GO:0005623(cell);GO:0005634(nucleus);GO:0009902(chloroplast relocation);GO:0031022(nuclear migration along microfilament)	NA	NA	NA	PREDICTED: LOW QUALITY PROTEIN: protein PLASTID MOVEMENT IMPAIRED 1-RELATED 1-like [Pyrus x bretschneideri]	14.4384	65.0519	4.50548	2.17168	0.00069722	0.0164225
D8674_014695	gnl|WGS:SMOL|Pdr15g019870.1	GO:0009507(chloroplast);GO:0016491(oxidoreductase activity);GO:0055114(oxidation-reduction process)	03030(DNA replication)	K02209	EC:3.6.4.12	PREDICTED: uncharacterized protein LOC103955947 [Pyrus x bretschneideri]	1.59233	7.42543	4.66325	2.22134	0.000710103	0.0166429
D8674_016376	gnl|WGS:SMOL|Pdr16g007810.1	GO:0008175(tRNA methyltransferase activity);GO:0008649(rRNA methyltransferase activity);GO:0070475(rRNA base methylation)	NA	NA	NA	PREDICTED: dual-specificity RNA methyltransferase RlmN-like [Malus domestica]	1.13644	5.36352	4.71957	2.23866	0.000711275	0.0166497
D8674_037383	gnl|WGS:SMOL|Pdr0g008980.1	GO:0000209(protein polyubiquitination);GO:0005886(plasma membrane);GO:0009789(positive regulation of abscisic acid-activated signaling pathway);GO:0043161(proteasome-mediated ubiquitin-dependent protein catabolic process);GO:0061630(ubiquitin protein ligase activity)	NA	NA	NA	PREDICTED: E3 ubiquitin-protein ligase RHA2A-like [Pyrus x bretschneideri]	1.91235	8.87255	4.63961	2.214	0.000723948	0.0168211
D8674_016382	gnl|WGS:SMOL|Pdr16g007870.1	GO:0008270(zinc ion binding);GO:0009409(response to cold);GO:0009507(chloroplast);GO:0009570(chloroplast stroma);GO:0009579(thylakoid);GO:0009941(chloroplast envelope);GO:0010319(stromule);GO:0035671(enone reductase activity);GO:0035798(2-alkenal reductase (NADP+) activity);GO:0048046(apoplast);GO:0055114(oxidation-reduction process)	NA	NA	NA	PREDICTED: 2-methylene-furan-3-one reductase-like [Malus domestica]	5.79742	26.1019	4.50234	2.17067	0.00074089	0.0171724
D8674_031295	gnl|WGS:SMOL|Pdr7g012190.1	GO:0005634(nucleus)	NA	NA	NA	PREDICTED: protein SDE2 homolog [Malus domestica]	49.0784	217.961	4.44108	2.15091	0.000766984	0.017712
D8674_012513	gnl|WGS:SMOL|Pdr14g017500.1	GO:0003950(NAD+ ADP-ribosyltransferase activity);GO:0005634(nucleus);GO:0005739(mitochondrion);GO:0007275(multicellular organism development);GO:0009651(response to salt stress);GO:0016363(nuclear matrix);GO:0072593(reactive oxygen species metabolic process)	NA	NA	NA	PREDICTED: probable inactive poly [ADP-ribose] polymerase SRO5 isoform X1 [Pyrus x bretschneideri]	11.1481	49.5245	4.44242	2.15135	0.000782705	0.0179433
D8674_028080	gnl|WGS:SMOL|Pdr5g025560.1	GO:0003674(molecular_function);GO:0005634(nucleus);GO:0005737(cytoplasm);GO:0009860(pollen tube growth);GO:0040008(regulation of growth)	NA	NA	NA	PREDICTED: CRIB domain-containing protein RIC10-like [Pyrus x bretschneideri]	0.672961	3.20511	4.7627	2.25178	0.000800056	0.0182731
D8674_002918	gnl|WGS:SMOL|Pdr10g010720.1	GO:0005975(carbohydrate metabolic process);GO:0005986(sucrose biosynthetic process);GO:0006000(fructose metabolic process);GO:0006002(fructose 6-phosphate metabolic process);GO:0006094(gluconeogenesis);GO:0009507(chloroplast);GO:0009570(chloroplast stroma);GO:0009579(thylakoid);GO:0009941(chloroplast envelope);GO:0016051(carbohydrate biosynthetic process);GO:0019252(starch biosynthetic process);G…	00710(Carbon fixation in photosynthetic organisms)	K01100	EC:3.1.3.37	PREDICTED: sedoheptulose-1,7-bisphosphatase, chloroplastic-like [Pyrus x bretschneideri]	0.881746	4.13092	4.68493	2.22803	0.000812174	0.0184618
D8674_028396	gnl|WGS:SMOL|Pdr6g002040.1	GO:0004004(ATP-dependent RNA helicase activity);GO:0005739(mitochondrion);GO:0010501(RNA secondary structure unwinding)	NA	NA	NA	PREDICTED: DEAD-box ATP-dependent RNA helicase 5-like [Pyrus x bretschneideri]	2.07481	9.48685	4.57239	2.19295	0.000816411	0.0185135
D8674_033482	gnl|WGS:SMOL|Pdr8g010280.2	GO:0005351(carbohydrate:proton symporter activity);GO:0005773(vacuole);GO:0005801(cis-Golgi network);GO:0005886(plasma membrane);GO:0005887(integral component of plasma membrane);GO:0005985(sucrose metabolic process);GO:0008506(sucrose:proton symporter activity);GO:0008515(sucrose transmembrane transporter activity);GO:0015144(carbohydrate transmembrane transporter activity);GO:0015293(symporter …	NA	NA	NA	PREDICTED: sucrose transport protein SUC4-like isoform X1 [Pyrus x bretschneideri]	8.15158	35.9591	4.4113	2.1412	0.00082376	0.0186353
D8674_035807	gnl|WGS:SMOL|Pdr9g012660.1	GO:0003723(RNA binding);GO:0004829(threonine-tRNA ligase activity);GO:0005739(mitochondrion);GO:0006435(threonyl-tRNA aminoacylation);GO:0009570(chloroplast stroma)	00970(Aminoacyl-tRNA biosynthesis)	K01868	EC:6.1.1.3	PREDICTED: threonine--tRNA ligase, chloroplastic/mitochondrial 2-like [Malus domestica]	0.701871	3.24141	4.61824	2.20734	0.00082755	0.0186987
D8674_029175	gnl|WGS:SMOL|Pdr6g009830.1	GO:0047037(salutaridine reductase (NADPH) activity);GO:0050661(NADP binding);GO:0097295(morphine biosynthetic process)	00902(Monoterpenoid biosynthesis)	K15095	EC:1.1.1.208	PREDICTED: salutaridine reductase-like [Pyrus x bretschneideri]	56.1532	246.569	4.39101	2.13455	0.000835321	0.0188067
D8674_004719	gnl|WGS:SMOL|Pdr10g028730.1	GO:0009416(response to light stimulus);GO:0009535(chloroplast thylakoid membrane);GO:0009768(photosynthesis, light harvesting in photosystem I);GO:0009941(chloroplast envelope);GO:0010287(plastoglobule);GO:0016168(chlorophyll binding);GO:0031409(pigment binding)	00196(Photosynthesis - antenna proteins)	K08916	NA	PREDICTED: chlorophyll a-b binding protein CP26, chloroplastic-like [Pyrus x bretschneideri]	9.81426	43.1444	4.39609	2.13622	0.00085577	0.0192212
D8674_016922	gnl|WGS:SMOL|Pdr16g013270.1	NA	NA	NA	NA	hypothetical protein DVH24_025561 [Malus domestica]	15.5863	68.2981	4.38194	2.13157	0.000862983	0.0193142
D8674_015850	gnl|WGS:SMOL|Pdr16g002550.1	GO:0003674(molecular_function);GO:0005575(cellular_component);GO:0006952(defense response);GO:0009607(response to biotic stimulus)	NA	NA	NA	PREDICTED: MLP-like protein 329 [Pyrus x bretschneideri]	6.80632	30.1717	4.43289	2.14825	0.000866433	0.0193685
D8674_002256	gnl|WGS:SMOL|Pdr10g004100.1	GO:0005634(nucleus);GO:0009414(response to water deprivation);GO:0009785(blue light signaling pathway);GO:0010161(red light signaling pathway)	NA	NA	NA	PREDICTED: protein DEHYDRATION-INDUCED 19 homolog 4-like [Pyrus x bretschneideri]	25.918	112.988	4.35944	2.12414	0.000883218	0.0196537
D8674_041849	gnl|WGS:SMOL|Pdr0g053640.1	GO:0005794(Golgi apparatus);GO:0016413(O-acetyltransferase activity);GO:0071554(cell wall organization or biogenesis)	NA	NA	NA	PREDICTED: protein trichome birefringence-like 19 [Pyrus x bretschneideri]	16.3244	70.6178	4.32589	2.113	0.000931502	0.0205311
D8674_008528	gnl|WGS:SMOL|Pdr12g012360.1	GO:0003700(DNA binding transcription factor activity);GO:0005515(protein binding);GO:0005634(nucleus);GO:0005886(plasma membrane);GO:0006355(regulation of transcription, DNA-templated);GO:0010629(negative regulation of gene expression);GO:1900037(regulation of cellular response to hypoxia)	NA	NA	NA	PREDICTED: uncharacterized protein LOC103927663 [Pyrus x bretschneideri]	17.907	77.2999	4.31675	2.10995	0.000943331	0.0207209
D8674_015964	gnl|WGS:SMOL|Pdr16g003690.1	GO:0005737(cytoplasm);GO:0006979(response to oxidative stress);GO:0015031(protein transport)	04144(Endocytosis)	K19476	NA	PREDICTED: uncharacterized protein LOC103947383 [Pyrus x bretschneideri]	8.22761	35.6364	4.33133	2.11481	0.000948683	0.0207963
D8674_000761	gnl|WGS:SMOL|Pdr1g007610.1	GO:0003700(DNA binding transcription factor activity);GO:0005634(nucleus);GO:0006355(regulation of transcription, DNA-templated);GO:0009793(embryo development ending in seed dormancy)	NA	NA	NA	PREDICTED: uncharacterized protein At4g00950 [Pyrus x bretschneideri]	4.35216	19.0235	4.37105	2.12798	0.000949042	0.0207963
D8674_014630	gnl|WGS:SMOL|Pdr15g019220.1	GO:0004017(adenylate kinase activity);GO:0005524(ATP binding);GO:0009507(chloroplast);GO:0009534(chloroplast thylakoid);GO:0009535(chloroplast thylakoid membrane);GO:0009941(chloroplast envelope)	00230(Purine metabolism);00730(Thiamine metabolism)	K00939	EC:2.7.4.3	PREDICTED: adenylate kinase 5, chloroplastic-like [Pyrus x bretschneideri]	0.718761	3.29642	4.58625	2.19732	0.0009569	0.0209198
D8674_008812	gnl|WGS:SMOL|Pdr12g015200.1	GO:0005515(protein binding);GO:0005524(ATP binding);GO:0005739(mitochondrion);GO:0009507(chloroplast);GO:0009570(chloroplast stroma);GO:0009706(chloroplast inner membrane);GO:0010007(magnesium chelatase complex);GO:0015979(photosynthesis);GO:0015995(chlorophyll biosynthetic process);GO:0016851(magnesium chelatase activity)	00860(Porphyrin and chlorophyll metabolism)	K03403	EC:6.6.1.1	PREDICTED: magnesium-chelatase subunit ChlH, chloroplastic-like [Pyrus x bretschneideri]	8.70003	37.4187	4.30098	2.10467	0.000965718	0.0210395
D8674_024166	gnl|WGS:SMOL|Pdr4g007390.1	GO:0005215(transporter activity);GO:0005886(plasma membrane);GO:0006807(nitrogen compound metabolic process);GO:0006857(oligopeptide transport);GO:0009506(plasmodesma);GO:0015031(protein transport);GO:0016020(membrane);GO:0016021(integral component of membrane);GO:0022857(transmembrane transporter activity);GO:0042937(tripeptide transmembrane transporter activity);GO:0042938(dipeptide transport);…	NA	NA	NA	hypothetical protein PRUPE_6G271100 [Prunus persica]	0.765208	3.39971	4.44286	2.15149	0.000973646	0.0211633
D8674_024681	gnl|WGS:SMOL|Pdr4g012540.1	GO:0004197(cysteine-type endopeptidase activity);GO:0006624(vacuolar protein processing);GO:0051603(proteolysis involved in cellular protein catabolic process)	NA	NA	NA	hypothetical protein DVH24_001381 [Malus domestica]	16.4466	70.6826	4.29771	2.10357	0.000980903	0.0212721
D8674_040069	gnl|WGS:SMOL|Pdr0g035840.1	GO:0009507(chloroplast);GO:0016301(kinase activity);GO:0016310(phosphorylation)	NA	NA	NA	hypothetical protein DVH24_017338 [Malus domestica]	2.81078	12.6197	4.48975	2.16664	0.00100346	0.0216368
D8674_006856	gnl|WGS:SMOL|Pdr11g021170.1	GO:0003824(catalytic activity);GO:0005829(cytosol);GO:0009809(lignin biosynthetic process);GO:0016621(cinnamoyl-CoA reductase activity);GO:0050662(coenzyme binding)	00940(Phenylpropanoid biosynthesis)	K09753	EC:1.2.1.44	PREDICTED: cinnamoyl-CoA reductase 1 isoform X1 [Pyrus x bretschneideri]	15.0773	64.7165	4.29233	2.10176	0.00100935	0.0217391
D8674_018512	gnl|WGS:SMOL|Pdr17g004420.1	GO:0007165(signal transduction);GO:0016020(membrane)	NA	NA	NA	PREDICTED: uncharacterized protein LOC103935347 isoform X1 [Pyrus x bretschneideri]	1.65085	7.14813	4.32996	2.11435	0.0010159	0.0218002
D8674_037442	gnl|WGS:SMOL|Pdr0g009570.1	NA	NA	NA	NA	PREDICTED: early nodulin-75-like isoform X2 [Pyrus x bretschneideri]	1.44822	6.46559	4.46452	2.1585	0.00101763	0.0218002
D8674_006706	gnl|WGS:SMOL|Pdr11g019670.2	GO:0003674(molecular_function);GO:0005634(nucleus);GO:0006979(response to oxidative stress)	NA	NA	NA	PREDICTED: uncharacterized protein LOC103941689 isoform X2 [Pyrus x bretschneideri]	1.26801	5.66369	4.46659	2.15917	0.00102186	0.0218341
D8674_008375	gnl|WGS:SMOL|Pdr12g010830.1	GO:0003674(molecular_function);GO:0005739(mitochondrion);GO:0008150(biological_process)	NA	NA	NA	PREDICTED: uncharacterized protein LOC103934848 [Pyrus x bretschneideri]	12.2619	52.5435	4.28511	2.09933	0.00103006	0.0219843
D8674_007244	gnl|WGS:SMOL|Pdr11g025050.1	GO:0009055(electron transfer activity);GO:0009507(chloroplast);GO:0009536(plastid);GO:0009706(chloroplast inner membrane);GO:0009941(chloroplast envelope);GO:0010277(chlorophyllide a oxygenase [overall] activity);GO:0015031(protein transport);GO:0016021(integral component of membrane);GO:0046872(metal ion binding);GO:0051537(2 iron, 2 sulfur cluster binding);GO:0055114(oxidation-reduction process)	00860(Porphyrin and chlorophyll metabolism)	K13071	EC:1.14.15.17	PREDICTED: protochlorophyllide-dependent translocon component 52, chloroplastic-like [Pyrus x bretschneideri]	9.76195	41.6795	4.26959	2.0941	0.00104989	0.022215
D8674_012127	gnl|WGS:SMOL|Pdr14g013640.1	GO:0005739(mitochondrion);GO:0005773(vacuole);GO:0008289(lipid binding);GO:0015914(phospholipid transport);GO:0016021(integral component of membrane)	NA	NA	NA	PREDICTED: uncharacterized protein LOC103939842 [Pyrus x bretschneideri]	79.3526	333.862	4.20732	2.0729	0.00111214	0.023366
D8674_018651	gnl|WGS:SMOL|Pdr17g005810.1	GO:0003674(molecular_function);GO:0005634(nucleus);GO:0008150(biological_process)	NA	NA	NA	PREDICTED: uncharacterized protein LOC103404804 [Malus domestica]	4.71982	20.548	4.35354	2.12219	0.00113886	0.0238005
D8674_039954	gnl|WGS:SMOL|Pdr0g034690.1	NA	NA	NA	NA	hypothetical protein DVH24_002539 [Malus domestica]	2.26132	9.88119	4.36964	2.12752	0.00113913	0.0238005
D8674_022561	gnl|WGS:SMOL|Pdr3g013610.1	GO:0003674(molecular_function);GO:0005634(nucleus);GO:0008150(biological_process)	00310(Lysine degradation)	K11420	EC:2.1.1.43	PREDICTED: uncharacterized protein LOC103927937 isoform X2 [Pyrus x bretschneideri]	9.46199	39.8952	4.21637	2.076	0.00114313	0.0238577
D8674_008518	gnl|WGS:SMOL|Pdr12g012260.3	GO:0016021(integral component of membrane)	NA	NA	NA	PREDICTED: uncharacterized protein LOC103933044 [Pyrus x bretschneideri]	3.68491	15.5875	4.23009	2.08069	0.00114591	0.0238894
D8674_006164	gnl|WGS:SMOL|Pdr11g014250.1	NA	NA	NA	NA	PREDICTED: uncharacterized protein LOC103926585 [Pyrus x bretschneideri]	1.6183	7.2796	4.49831	2.16938	0.00115453	0.0240079
D8674_032386	gnl|WGS:SMOL|Pdr7g023100.1	GO:0003674(molecular_function);GO:0005634(nucleus);GO:0008150(biological_process)	NA	NA	NA	PREDICTED: uncharacterized protein LOC103951527 [Pyrus x bretschneideri]	1.13536	5.11055	4.50126	2.17033	0.00119149	0.024622
D8674_001065	gnl|WGS:SMOL|Pdr1g010650.1	GO:0000156(phosphorelay response regulator activity);GO:0000160(phosphorelay signal transduction system);GO:0003677(DNA binding);GO:0005634(nucleus);GO:0005739(mitochondrion);GO:0006351(transcription, DNA-templated);GO:0006355(regulation of transcription, DNA-templated);GO:0007623(circadian rhythm);GO:0009266(response to temperature stimulus);GO:0010017(red or far-red light signaling pathway);GO:…	04712(Circadian rhythm - plant)	K12129	NA	PREDICTED: LOW QUALITY PROTEIN: two-component response regulator-like APRR3 [Malus domestica]	3.69176	15.4241	4.17799	2.06281	0.00123011	0.0252124
D8674_028780	gnl|WGS:SMOL|Pdr6g005880.1	NA	NA	NA	NA	hypothetical protein PanWU01x14_314030 [Parasponia andersonii]	433.549	1797.19	4.1453	2.05148	0.00123285	0.0252124
D8674_027601	gnl|WGS:SMOL|Pdr5g020770.1	GO:0004674(protein serine/threonine kinase activity);GO:0005886(plasma membrane)	NA	NA	NA	PREDICTED: probable LRR receptor-like serine/threonine-protein kinase At1g56140 [Pyrus x bretschneideri]	1.48112	6.32839	4.2727	2.09515	0.00123324	0.0252124
D8674_010862	gnl|WGS:SMOL|Pdr14g000990.1	NA	NA	NA	NA	PREDICTED: uncharacterized protein LOC103944347 [Pyrus x bretschneideri]	24.6375	102.663	4.16695	2.05899	0.0012361	0.0252124
D8674_001278	gnl|WGS:SMOL|Pdr1g012780.1	GO:0003674(molecular_function);GO:0005739(mitochondrion);GO:0008150(biological_process)	NA	NA	NA	PREDICTED: pentatricopeptide repeat-containing protein At3g56030-like [Pyrus x bretschneideri]	3.51726	14.8421	4.2198	2.07718	0.00123774	0.0252186
D8674_035426	gnl|WGS:SMOL|Pdr9g008850.1	GO:0003674(molecular_function);GO:0005634(nucleus);GO:0008150(biological_process)	NA	NA	NA	PREDICTED: dormancy-associated protein homolog 4-like [Pyrus x bretschneideri]	21.8363	90.5468	4.14661	2.05193	0.00125255	0.0254654
D8674_005493	gnl|WGS:SMOL|Pdr11g007540.1	NA	NA	NA	NA	hypothetical protein DVH24_003541 [Malus domestica]	45.7184	189.403	4.14282	2.05061	0.00125656	0.0255088
D8674_022890	gnl|WGS:SMOL|Pdr3g016900.1	GO:0003700(DNA binding transcription factor activity);GO:0005634(nucleus);GO:0006351(transcription, DNA-templated);GO:0006355(regulation of transcription, DNA-templated);GO:0009555(pollen development);GO:0009793(embryo development ending in seed dormancy);GO:0043565(sequence-specific DNA binding)	04016(MAPK signaling pathway - plant);04626(Plant-pathogen interaction)	K13425	NA	PREDICTED: probable WRKY transcription factor 65 [Pyrus x bretschneideri]	2.27762	9.68854	4.2538	2.08875	0.00125739	0.0255088
D8674_033315	gnl|WGS:SMOL|Pdr8g008610.1	GO:0004721(phosphoprotein phosphatase activity);GO:0004722(protein serine/threonine phosphatase activity);GO:0009507(chloroplast);GO:0046872(metal ion binding)	NA	NA	NA	PREDICTED: probable protein phosphatase 2C 71 [Pyrus x bretschneideri]	3.475	14.5595	4.18977	2.06687	0.00128048	0.0258659
D8674_014166	gnl|WGS:SMOL|Pdr15g014580.1	GO:0006952(defense response)	NA	NA	NA	PREDICTED: protein LURP-one-related 6-like [Pyrus x bretschneideri]	2.40975	10.2071	4.23575	2.08262	0.00128563	0.0259423
D8674_002426	gnl|WGS:SMOL|Pdr10g005800.1	GO:0009416(response to light stimulus);GO:0009535(chloroplast thylakoid membrane);GO:0009768(photosynthesis, light harvesting in photosystem I);GO:0009941(chloroplast envelope);GO:0010287(plastoglobule);GO:0016168(chlorophyll binding);GO:0031409(pigment binding)	00196(Photosynthesis - antenna proteins)	K08912	NA	PREDICTED: chlorophyll a-b binding protein of LHCII type 1 [Malus domestica]	6.95672	28.9044	4.15489	2.05481	0.00129126	0.0260002
D8674_034655	gnl|WGS:SMOL|Pdr9g001140.1	GO:0005575(cellular_component);GO:0008152(metabolic process);GO:0016846(carbon-sulfur lyase activity)	NA	NA	NA	PREDICTED: centromere protein V [Pyrus x bretschneideri]	3.8514	16.3019	4.23271	2.08158	0.00130196	0.0261877
D8674_005117	gnl|WGS:SMOL|Pdr11g003780.1	GO:0005737(cytoplasm);GO:0008757(S-adenosylmethionine-dependent methyltransferase activity);GO:0032259(methylation)	00130(Ubiquinone and other terpenoid-quinone biosynthesis)	K12502	EC:2.1.1.295	hypothetical protein DVH24_027030 [Malus domestica]	19.6217	80.6566	4.11057	2.03934	0.00133655	0.0266842
D8674_027792	gnl|WGS:SMOL|Pdr5g022680.1	GO:0003674(molecular_function);GO:0005634(nucleus);GO:0008150(biological_process)	NA	NA	NA	PREDICTED: uncharacterized protein LOC103944673 [Pyrus x bretschneideri]	0.928642	4.14836	4.46713	2.15935	0.00135818	0.0270589
D8674_027105	gnl|WGS:SMOL|Pdr5g015810.1	GO:0005634(nucleus);GO:0016925(protein sumoylation);GO:0031386(protein tag)	03013(RNA transport)	K12160	NA	PREDICTED: small ubiquitin-related modifier 1-like [Pyrus x bretschneideri]	7.67503	32.4157	4.22353	2.07845	0.00137378	0.0272545
D8674_031478	gnl|WGS:SMOL|Pdr7g014020.1	GO:0009416(response to light stimulus);GO:0009535(chloroplast thylakoid membrane);GO:0009768(photosynthesis, light harvesting in photosystem I);GO:0009941(chloroplast envelope);GO:0010287(plastoglobule);GO:0016168(chlorophyll binding);GO:0031409(pigment binding)	00196(Photosynthesis - antenna proteins)	K08907	NA	PREDICTED: chlorophyll a-b binding protein 6, chloroplastic-like [Malus domestica]	32.8769	134.135	4.07993	2.02855	0.00140112	0.0277387
D8674_008670	gnl|WGS:SMOL|Pdr12g013780.1	GO:0005634(nucleus)	04075(Plant hormone signal transduction)	K14492	NA	PREDICTED: two-component response regulator ORR10-like [Pyrus x bretschneideri]	1.75913	7.48358	4.25413	2.08886	0.00141376	0.0279303
D8674_033917	gnl|WGS:SMOL|Pdr8g014630.1	GO:0003674(molecular_function);GO:0005634(nucleus);GO:0006979(response to oxidative stress);GO:0016607(nuclear speck);GO:0046686(response to cadmium ion)	NA	NA	NA	PREDICTED: uncharacterized protein LOC103938069 [Pyrus x bretschneideri]	5.30534	22.1755	4.17986	2.06345	0.00141804	0.0279855
D8674_034929	gnl|WGS:SMOL|Pdr9g003880.1	GO:0000151(ubiquitin ligase complex);GO:0004842(ubiquitin-protein transferase activity);GO:0005515(protein binding);GO:0005634(nucleus);GO:0006511(ubiquitin-dependent protein catabolic process);GO:0007568(aging);GO:0009414(response to water deprivation);GO:0009416(response to light stimulus);GO:0009734(auxin-activated signaling pathway);GO:0009926(auxin polar transport);GO:0009934(regulation of m…	NA	NA	NA	PREDICTED: F-box/LRR-repeat MAX2 homolog A [Malus domestica]	6.00695	24.49	4.07694	2.02749	0.00143566	0.0282153
D8674_039495	gnl|WGS:SMOL|Pdr0g030100.1	GO:0003674(molecular_function);GO:0005739(mitochondrion);GO:0043457(regulation of cellular respiration)	NA	NA	NA	PREDICTED: uncharacterized protein LOC108865894 [Pyrus x bretschneideri]	416.692	1688.18	4.05138	2.01841	0.00143823	0.0282362
D8674_009127	gnl|WGS:SMOL|Pdr12g018350.1	GO:0004332(fructose-bisphosphate aldolase activity);GO:0005507(copper ion binding);GO:0005515(protein binding);GO:0005634(nucleus);GO:0005737(cytoplasm);GO:0005739(mitochondrion);GO:0005829(cytosol);GO:0005886(plasma membrane);GO:0006094(gluconeogenesis);GO:0006096(glycolytic process);GO:0006098(pentose-phosphate shunt);GO:0009506(plasmodesma);GO:0009651(response to salt stress);GO:0009735(respon…	00010(Glycolysis / Gluconeogenesis);00030(Pentose phosphate pathway);00051(Fructose and mannose metabolism);00710(Carbon fixation in photosynthetic organisms)	K01623	EC:4.1.2.13	PREDICTED: fructose-bisphosphate aldolase, cytoplasmic isozyme [Pyrus x bretschneideri]	1103.41	4466.78	4.04816	2.01727	0.00144293	0.0282697
D8674_041055	gnl|WGS:SMOL|Pdr0g045700.1	GO:0005215(transporter activity);GO:0005634(nucleus);GO:0005829(cytosol);GO:0005886(plasma membrane);GO:0006810(transport);GO:0007049(cell cycle);GO:0008289(lipid binding);GO:0051301(cell division)	NA	NA	NA	PREDICTED: patellin-3-like [Pyrus x bretschneideri]	224.42	905.985	4.037	2.01328	0.00147096	0.0287591
D8674_035730	gnl|WGS:SMOL|Pdr9g011890.1	GO:0009416(response to light stimulus);GO:0009535(chloroplast thylakoid membrane);GO:0009768(photosynthesis, light harvesting in photosystem I);GO:0009941(chloroplast envelope);GO:0010287(plastoglobule);GO:0016168(chlorophyll binding);GO:0031409(pigment binding)	00196(Photosynthesis - antenna proteins)	K08909	NA	PREDICTED: photosystem I chlorophyll a/b-binding protein 3-1, chloroplastic-like [Malus domestica]	35.1547	142.157	4.04375	2.0157	0.00147165	0.0287591
D8674_002482	gnl|WGS:SMOL|Pdr10g006360.1	GO:0005789(endoplasmic reticulum membrane);GO:0051604(protein maturation)	04141(Protein processing in endoplasmic reticulum)	K10950	EC:1.8.4.-	PREDICTED: endoplasmic reticulum oxidoreductin-1-like isoform X2 [Pyrus x bretschneideri]	139.73	563.957	4.03605	2.01294	0.00147468	0.0287591
D8674_014309	gnl|WGS:SMOL|Pdr15g016010.1	GO:0005737(cytoplasm)	04626(Plant-pathogen interaction)	K04368	EC:2.7.12.2	hypothetical protein DVH24_018038 [Malus domestica]	0.645551	2.82091	4.36976	2.12756	0.00148466	0.028877
D8674_029788	gnl|WGS:SMOL|Pdr6g015960.1	GO:0003674(molecular_function);GO:0008150(biological_process);GO:0009507(chloroplast);GO:0016021(integral component of membrane)	NA	NA	NA	PREDICTED: uncharacterized endoplasmic reticulum membrane protein C16E8.02-like [Malus domestica]	3.53275	14.9007	4.21786	2.07651	0.0014889	0.0288855
D8674_000388	gnl|WGS:SMOL|Pdr1g003880.1	GO:0003824(catalytic activity);GO:0005737(cytoplasm);GO:0005886(plasma membrane);GO:0007165(signal transduction);GO:0019898(extrinsic component of membrane)	NA	NA	NA	PREDICTED: lanC-like protein GCL1 [Pyrus x bretschneideri]	40.8586	164.761	4.03248	2.01167	0.00149148	0.0288855
D8674_018074	gnl|WGS:SMOL|Pdr17g000040.1	GO:0005737(cytoplasm);GO:0005829(cytosol);GO:0006006(glucose metabolic process);GO:0006096(glycolytic process);GO:0009507(chloroplast);GO:0009570(chloroplast stroma);GO:0009941(chloroplast envelope);GO:0016020(membrane);GO:0016021(integral component of membrane);GO:0016620(oxidoreductase activity, acting on the aldehyde or oxo group of donors, NAD or NADP as acceptor);GO:0019253(reductive pentose…	00710(Carbon fixation in photosynthetic organisms)	K05298	EC:1.2.1.13	PREDICTED: glyceraldehyde-3-phosphate dehydrogenase A, chloroplastic isoform X1 [Pyrus x bretschneideri]	15.5933	62.9503	4.03702	2.01329	0.00149267	0.0288855
D8674_027480	gnl|WGS:SMOL|Pdr5g019560.1	GO:0009705(plant-type vacuole membrane);GO:0016021(integral component of membrane)	NA	NA	NA	PREDICTED: organic cation/carnitine transporter 3-like [Pyrus x bretschneideri]	2.05577	8.64051	4.20306	2.07144	0.0014929	0.0288855
D8674_023161	gnl|WGS:SMOL|Pdr3g019610.1	GO:0003873(6-phosphofructo-2-kinase activity);GO:0004331(fructose-2,6-bisphosphate 2-phosphatase activity);GO:0005524(ATP binding);GO:0005634(nucleus);GO:0005829(cytosol);GO:0005886(plasma membrane);GO:0006000(fructose metabolic process);GO:0006002(fructose 6-phosphate metabolic process);GO:0006003(fructose 2,6-bisphosphate metabolic process);GO:0043609(regulation of carbon utilization);GO:200107…	00051(Fructose and mannose metabolism)	K01103	EC:2.7.1.105;EC:3.1.3.46	PREDICTED: 6-phosphofructo-2-kinase/fructose-2,6-bisphosphatase-like [Pyrus x bretschneideri]	20.1104	81.0817	4.03182	2.01143	0.0014958	0.0288855
D8674_036515	gnl|WGS:SMOL|Pdr0g000300.1	GO:0003676(nucleic acid binding);GO:0005634(nucleus);GO:0006397(mRNA processing)	NA	NA	NA	PREDICTED: RNA-binding protein 39 isoform X1 [Pyrus x bretschneideri]	8.23296	33.2912	4.04366	2.01566	0.00149751	0.0288891
D8674_008360	gnl|WGS:SMOL|Pdr12g010680.1	GO:0005576(extracellular region);GO:0008168(methyltransferase activity);GO:0016021(integral component of membrane)	NA	NA	NA	PREDICTED: uncharacterized protein LOC103934759 [Pyrus x bretschneideri]	4.55557	18.3834	4.03537	2.0127	0.00152787	0.0294146
D8674_035512	gnl|WGS:SMOL|Pdr9g009710.1	GO:0005215(transporter activity);GO:0005739(mitochondrion);GO:0008150(biological_process)	NA	NA	NA	PREDICTED: uncharacterized protein LOC103935922 [Pyrus x bretschneideri]	49.4673	198.093	4.00452	2.00163	0.00156026	0.0299466
D8674_000785	gnl|WGS:SMOL|Pdr1g007850.1	GO:0003674(molecular_function);GO:0005739(mitochondrion);GO:0008150(biological_process);GO:0009507(chloroplast);GO:0009534(chloroplast thylakoid);GO:0009706(chloroplast inner membrane);GO:0009941(chloroplast envelope);GO:0016021(integral component of membrane)	NA	NA	NA	PREDICTED: uncharacterized protein LOC103964251 [Pyrus x bretschneideri]	11.7999	47.4346	4.01993	2.00717	0.00157486	0.0299855
D8674_012503	gnl|WGS:SMOL|Pdr14g017400.1	GO:0005887(integral component of plasma membrane);GO:0008509(anion transmembrane transporter activity);GO:0051453(regulation of intracellular pH);GO:0098656(anion transmembrane transport)	NA	NA	NA	PREDICTED: probable boron transporter 2 [Pyrus x bretschneideri]	0.553532	2.30161	4.15804	2.0559	0.00158854	0.0302126
D8674_033084	gnl|WGS:SMOL|Pdr8g006300.1	GO:0000103(sulfate assimilation);GO:0005737(cytoplasm);GO:0006457(protein folding);GO:0015035(protein disulfide oxidoreductase activity);GO:0016671(oxidoreductase activity, acting on a sulfur group of donors, disulfide as acceptor);GO:0034599(cellular response to oxidative stress);GO:0045454(cell redox homeostasis);GO:0055114(oxidation-reduction process)	NA	NA	NA	hypothetical protein DVH24_020073 [Malus domestica]	3.33185	13.5861	4.07764	2.02773	0.00159693	0.0303112
D8674_032460	gnl|WGS:SMOL|Pdr8g000060.1	GO:0003674(molecular_function);GO:0005739(mitochondrion);GO:0008150(biological_process)	NA	NA	NA	PREDICTED: uncharacterized protein LOC103963987 [Pyrus x bretschneideri]	36.2052	144.438	3.98943	1.99618	0.00161856	0.0305985
D8674_006801	gnl|WGS:SMOL|Pdr11g020620.1	GO:0000398(mRNA splicing, via spliceosome);GO:0005686(U2 snRNP);GO:0005689(U12-type spliceosomal complex);GO:0071011(precatalytic spliceosome);GO:0071013(catalytic step 2 spliceosome)	03040(Spliceosome)	K12834	NA	PHD finger-like domain-containing protein 5B [Glycine soja]	2.75431	11.603	4.21265	2.07473	0.00162299	0.0306517
D8674_011302	gnl|WGS:SMOL|Pdr14g005390.1	GO:0003674(molecular_function);GO:0008150(biological_process);GO:0009507(chloroplast);GO:0009534(chloroplast thylakoid);GO:0009535(chloroplast thylakoid membrane);GO:0016021(integral component of membrane)	00073(Cutin, suberine and wax biosynthesis);04146(Peroxisome)	K13356	EC:1.2.1.84	hypothetical protein PRUPE_7G073600 [Prunus persica]	2.68757	11.1679	4.15538	2.05498	0.00163613	0.0308331
D8674_007461	gnl|WGS:SMOL|Pdr12g001690.1	GO:0005515(protein binding);GO:0006631(fatty acid metabolic process);GO:0009408(response to heat);GO:0009507(chloroplast);GO:0009534(chloroplast thylakoid);GO:0009535(chloroplast thylakoid membrane);GO:0009543(chloroplast thylakoid lumen);GO:0010028(xanthophyll cycle);GO:0015994(chlorophyll metabolic process);GO:0016122(xanthophyll metabolic process);GO:0030095(chloroplast photosystem II);GO:0031…	00906(Carotenoid biosynthesis)	K09839	EC:1.23.5.1	PREDICTED: violaxanthin de-epoxidase, chloroplastic isoform X1 [Pyrus x bretschneideri]	2.49486	10.1084	4.05171	2.01853	0.0016375	0.0308331
D8674_012553	gnl|WGS:SMOL|Pdr14g017900.1	GO:0003674(molecular_function);GO:0009507(chloroplast);GO:0009535(chloroplast thylakoid membrane);GO:0009773(photosynthetic electron transport in photosystem I);GO:0010598(NAD(P)H dehydrogenase complex (plastoquinone));GO:0016021(integral component of membrane)	NA	NA	NA	PREDICTED: photosynthetic NDH subunit of subcomplex B 4, chloroplastic-like [Malus domestica]	9.72193	38.9098	4.00227	2.00082	0.00165826	0.0311928
D8674_014460	gnl|WGS:SMOL|Pdr15g017520.1	GO:0000977(RNA polymerase II regulatory region sequence-specific DNA binding);GO:0003700(DNA binding transcription factor activity);GO:0005634(nucleus);GO:0006357(regulation of transcription by RNA polymerase II)	NA	NA	NA	PREDICTED: zinc finger BED domain-containing protein DAYSLEEPER-like [Malus domestica]	20.9587	83.1341	3.96657	1.98789	0.00166752	0.0313357
D8674_031626	gnl|WGS:SMOL|Pdr7g015500.1	GO:0004475(mannose-1-phosphate guanylyltransferase activity);GO:0005515(protein binding);GO:0005525(GTP binding);GO:0005634(nucleus);GO:0005737(cytoplasm);GO:0005829(cytosol);GO:0009058(biosynthetic process);GO:0009298(GDP-mannose biosynthetic process);GO:0009408(response to heat);GO:0009651(response to salt stress);GO:0009753(response to jasmonic acid);GO:0010193(response to ozone);GO:0016779(nu…	00051(Fructose and mannose metabolism);00520(Amino sugar and nucleotide sugar metabolism)	K00966	EC:2.7.7.13	PREDICTED: mannose-1-phosphate guanylyltransferase 1 [Malus domestica]	103.795	411.127	3.96097	1.98585	0.00167526	0.0314186
D8674_009884	gnl|WGS:SMOL|Pdr13g005640.1	GO:0016787(hydrolase activity)	NA	NA	NA	PREDICTED: uncharacterized protein LOC103935975 [Pyrus x bretschneideri]	0.996013	4.20012	4.21693	2.07619	0.00170372	0.031763
D8674_024708	gnl|WGS:SMOL|Pdr4g012810.1	GO:0003674(molecular_function);GO:0005634(nucleus);GO:0008150(biological_process)	NA	NA	NA	PREDICTED: uncharacterized protein LOC103952287 [Pyrus x bretschneideri]	1.52507	6.54542	4.29189	2.10161	0.00174056	0.032322
D8674_025804	gnl|WGS:SMOL|Pdr5g002800.1	GO:0005634(nucleus);GO:0008168(methyltransferase activity);GO:0032259(methylation)	NA	NA	NA	PREDICTED: protein SET DOMAIN GROUP 41 [Pyrus x bretschneideri]	5.04136	20.0116	3.96948	1.98895	0.00174442	0.032332
D8674_017607	gnl|WGS:SMOL|Pdr16g020120.1	GO:0005634(nucleus);GO:0005737(cytoplasm);GO:0005829(cytosol)	NA	NA	NA	PREDICTED: protein TSS [Pyrus x bretschneideri]	3.31791	13.1011	3.94859	1.98134	0.00174452	0.032332
D8674_009695	gnl|WGS:SMOL|Pdr13g003750.1	GO:0051213(dioxygenase activity)	00941(Flavonoid biosynthesis)	K05278	EC:1.14.20.6	PREDICTED: protein SRG1-like [Pyrus x bretschneideri]	2.18007	8.8041	4.03845	2.0138	0.00175097	0.0323878
D8674_019840	gnl|WGS:SMOL|Pdr17g017700.1	GO:0004588(orotate phosphoribosyltransferase activity);GO:0004590(orotidine-5'-phosphate decarboxylase activity);GO:0005737(cytoplasm);GO:0005829(cytosol);GO:0006207('de novo' pyrimidine nucleobase biosynthetic process);GO:0009116(nucleoside metabolic process);GO:0009220(pyrimidine ribonucleotide biosynthetic process);GO:0016036(cellular response to phosphate starvation);GO:0044205('de novo' UMP …	00240(Pyrimidine metabolism)	K13421	EC:2.4.2.10;EC:4.1.1.23	PREDICTED: uridine 5'-monophosphate synthase-like [Pyrus x bretschneideri]	1.53621	6.34046	4.12734	2.04521	0.00179385	0.0329548
D8674_001769	gnl|WGS:SMOL|Pdr1g017690.1	GO:0004519(endonuclease activity);GO:0004527(exonuclease activity);GO:0005509(calcium ion binding)	NA	NA	NA	PREDICTED: uncharacterized calcium-binding protein At1g02270-like [Pyrus x bretschneideri]	59.2215	231.458	3.90834	1.96655	0.0018333	0.0334515
D8674_024020	gnl|WGS:SMOL|Pdr4g005930.1	NA	NA	NA	NA	hypothetical protein DVH24_014902 [Malus domestica]	23.7292	92.6744	3.90551	1.96551	0.00187566	0.0340925
D8674_015510	gnl|WGS:SMOL|Pdr15g028020.1	GO:0003674(molecular_function);GO:0005634(nucleus);GO:0008150(biological_process)	NA	NA	NA	PREDICTED: uncharacterized protein LOC103954450 [Pyrus x bretschneideri]	1.25187	5.00042	3.99435	1.99796	0.00188072	0.0341436
D8674_005961	gnl|WGS:SMOL|Pdr11g012220.1	GO:0004760(serine-pyruvate transaminase activity);GO:0005777(peroxisome);GO:0005886(plasma membrane);GO:0008453(alanine-glyoxylate transaminase activity);GO:0009507(chloroplast);GO:0009570(chloroplast stroma);GO:0009853(photorespiration);GO:0016020(membrane);GO:0019265(glycine biosynthetic process, by transamination of glyoxylate);GO:0048046(apoplast);GO:0050281(serine-glyoxylate transaminase act…	00630(Glyoxylate and dicarboxylate metabolism);00250(Alanine, aspartate and glutamate metabolism);00260(Glycine, serine and threonine metabolism);04146(Peroxisome)	K00830	EC:2.6.1.44;EC:2.6.1.45	PREDICTED: serine--glyoxylate aminotransferase-like [Pyrus x bretschneideri]	22.4457	87.4991	3.89826	1.96283	0.00188209	0.0341436
D8674_019038	gnl|WGS:SMOL|Pdr17g009680.1	GO:0004439(phosphatidylinositol-4,5-bisphosphate 5-phosphatase activity);GO:0005634(nucleus);GO:0005774(vacuolar membrane);GO:0007033(vacuole organization);GO:0036092(phosphatidylinositol-3-phosphate biosynthetic process);GO:0042578(phosphoric ester hydrolase activity)	00562(Inositol phosphate metabolism);04070(Phosphatidylinositol signaling system)	K21797	EC:3.1.3.-	PREDICTED: phosphoinositide phosphatase SAC2-like [Pyrus x bretschneideri]	4.25398	16.6005	3.90234	1.96434	0.00189393	0.0342925
D8674_013589	gnl|WGS:SMOL|Pdr15g008810.1	GO:0000398(mRNA splicing, via spliceosome);GO:0005687(U4 snRNP);GO:0005690(U4atac snRNP);GO:0071011(precatalytic spliceosome);GO:0097526(spliceosomal tri-snRNP complex)	03040(Spliceosome)	K12844	NA	PREDICTED: U4/U6 small nuclear ribonucleoprotein Prp31-like [Malus domestica]	4.56075	17.9977	3.9462	1.98046	0.00189766	0.0343271
D8674_014792	gnl|WGS:SMOL|Pdr15g020840.1	GO:0003674(molecular_function);GO:0005739(mitochondrion);GO:0009507(chloroplast);GO:0009579(thylakoid)	NA	NA	NA	PREDICTED: uncharacterized protein LOC103448337 isoform X3 [Malus domestica]	1.95718	8.02069	4.09807	2.03495	0.00192098	0.0346283
D8674_030455	gnl|WGS:SMOL|Pdr7g003790.1	GO:0005506(iron ion binding);GO:0005515(protein binding);GO:0005634(nucleus);GO:0008270(zinc ion binding);GO:0009793(embryo development ending in seed dormancy);GO:0010106(cellular response to iron ion starvation);GO:0016021(integral component of membrane);GO:0016567(protein ubiquitination);GO:0016874(ligase activity);GO:0060586(multicellular organismal iron ion homeostasis);GO:0061630(ubiquitin …	NA	NA	NA	hypothetical protein DVH24_013670 [Malus domestica]	2.08981	8.2253	3.93591	1.9767	0.00192165	0.0346283
D8674_040970	gnl|WGS:SMOL|Pdr0g044850.1	GO:0000166(nucleotide binding);GO:0005634(nucleus);GO:0009718(anthocyanin-containing compound biosynthetic process);GO:0043153(entrainment of circadian clock by photoperiod);GO:0044212(transcription regulatory region DNA binding);GO:0048511(rhythmic process);GO:0048573(photoperiodism, flowering)	NA	NA	NA	PREDICTED: WD repeat-containing protein LWD1 [Pyrus x bretschneideri]	3.17019	12.5503	3.95884	1.98508	0.00194049	0.0348678
D8674_028461	gnl|WGS:SMOL|Pdr6g002690.1	GO:0005634(nucleus);GO:0005886(plasma membrane);GO:0007165(signal transduction)	00970(Aminoacyl-tRNA biosynthesis)	K01866	EC:6.1.1.1	PREDICTED: plant intracellular Ras-group-related LRR protein 5-like [Malus domestica]	78.2532	302.896	3.87071	1.9526	0.00195455	0.035087
D8674_019059	gnl|WGS:SMOL|Pdr17g009890.1	GO:0001666(response to hypoxia);GO:0004021(L-alanine:2-oxoglutarate aminotransferase activity);GO:0005524(ATP binding);GO:0005739(mitochondrion);GO:0005829(cytosol);GO:0009507(chloroplast);GO:0019481(L-alanine catabolic process, by transamination);GO:0046686(response to cadmium ion)	00710(Carbon fixation in photosynthetic organisms);00250(Alanine, aspartate and glutamate metabolism);00220(Arginine biosynthesis)	K00814	EC:2.6.1.2	PREDICTED: alanine aminotransferase 2 [Malus domestica]	1.74444	6.96126	3.99055	1.99659	0.00195852	0.0351249
D8674_005456	gnl|WGS:SMOL|Pdr11g007170.1	NA	NA	NA	NA	hypothetical protein JCGZ_08885 [Jatropha curcas]	51.7924	202.286	3.90572	1.96559	0.00196269	0.0351663
D8674_033332	gnl|WGS:SMOL|Pdr8g008780.1	GO:0004721(phosphoprotein phosphatase activity);GO:0004722(protein serine/threonine phosphatase activity);GO:0009507(chloroplast);GO:0046872(metal ion binding)	NA	NA	NA	PREDICTED: probable protein phosphatase 2C 71 [Pyrus x bretschneideri]	2.78327	10.8979	3.91549	1.96919	0.00197942	0.0353653
D8674_002417	gnl|WGS:SMOL|Pdr10g005710.1	GO:0005737(cytoplasm);GO:0008757(S-adenosylmethionine-dependent methyltransferase activity);GO:0032259(methylation)	NA	NA	NA	PREDICTED: uncharacterized protein LOC103945052 [Pyrus x bretschneideri]	3.22435	12.6455	3.92189	1.97155	0.00198514	0.0354004
D8674_015222	gnl|WGS:SMOL|Pdr15g025140.1	GO:0005739(mitochondrion)	03030(DNA replication);03420(Nucleotide excision repair);03430(Mismatch repair)	K10756	NA	PREDICTED: uncharacterized protein LOC103957049 isoform X1 [Pyrus x bretschneideri]	1.31762	5.22799	3.96776	1.98832	0.0020618	0.0365258
D8674_000981	gnl|WGS:SMOL|Pdr1g009810.1	GO:0000977(RNA polymerase II regulatory region sequence-specific DNA binding);GO:0001085(RNA polymerase II transcription factor binding);GO:0001228(transcriptional activator activity, RNA polymerase II transcription regulatory region sequence-specific DNA binding);GO:0003682(chromatin binding);GO:0005634(nucleus);GO:0005667(transcription factor complex);GO:0030154(cell differentiation)	NA	NA	NA	PREDICTED: GATA transcription factor 8-like [Pyrus x bretschneideri]	5.82368	22.4808	3.86025	1.94869	0.00206801	0.0365932
D8674_042189	gnl|WGS:SMOL|Pdr0g057040.1	GO:0003674(molecular_function);GO:0005634(nucleus);GO:0006351(transcription, DNA-templated);GO:0006355(regulation of transcription, DNA-templated);GO:0007623(circadian rhythm)	NA	NA	NA	PREDICTED: protein LNK3-like [Pyrus x bretschneideri]	7.88679	30.4309	3.85846	1.94803	0.00207284	0.0365932
D8674_018772	gnl|WGS:SMOL|Pdr17g007020.1	NA	NA	NA	NA	hypothetical protein DVH24_039499, partial [Malus domestica]	1.13395	4.64541	4.09667	2.03445	0.00207327	0.0365932
D8674_023132	gnl|WGS:SMOL|Pdr3g019320.1	GO:0005515(protein binding);GO:0005524(ATP binding);GO:0005634(nucleus);GO:0005737(cytoplasm);GO:0006351(transcription, DNA-templated);GO:0006355(regulation of transcription, DNA-templated);GO:0016787(hydrolase activity);GO:0019538(protein metabolic process);GO:1902347(response to strigolactone)	NA	NA	NA	PREDICTED: protein SMAX1-LIKE 6 [Pyrus x bretschneideri]	1.02956	4.05067	3.93436	1.97613	0.0020784	0.0366478
D8674_020295	gnl|WGS:SMOL|Pdr2g002530.1	GO:0003677(DNA binding);GO:0003700(DNA binding transcription factor activity);GO:0005515(protein binding);GO:0005634(nucleus);GO:0006351(transcription, DNA-templated);GO:0006355(regulation of transcription, DNA-templated);GO:0008361(regulation of cell size);GO:0048364(root development);GO:1900056(negative regulation of leaf senescence)	04712(Circadian rhythm - plant)	K16221	NA	hypothetical protein DVH24_026103 [Malus domestica]	5.92204	22.8456	3.85773	1.94775	0.00210297	0.0369118
D8674_029503	gnl|WGS:SMOL|Pdr6g013110.1	GO:0004197(cysteine-type endopeptidase activity);GO:0005615(extracellular space);GO:0005764(lysosome);GO:0051603(proteolysis involved in cellular protein catabolic process)	NA	NA	NA	PREDICTED: vignain [Pyrus x bretschneideri]	2.4184	9.53478	3.9426	1.97915	0.00210406	0.0369118
D8674_010015	gnl|WGS:SMOL|Pdr13g006950.1	GO:0009536(plastid)	00195(Photosynthesis)	K02703	EC:1.10.3.9	photosystem II D1 protein, partial (chloroplast) [Amaranthus powellii]	3.10745	12.4583	4.00915	2.0033	0.00211608	0.0370396
D8674_041463	gnl|WGS:SMOL|Pdr0g049780.1	GO:0009705(plant-type vacuole membrane)	NA	NA	NA	PREDICTED: putative chloride channel-like protein CLC-g [Pyrus x bretschneideri]	1.64884	6.4358	3.90323	1.96467	0.00212453	0.0371009
D8674_003622	gnl|WGS:SMOL|Pdr10g017760.1	GO:0003674(molecular_function);GO:0008150(biological_process);GO:0016021(integral component of membrane)	NA	NA	NA	PREDICTED: uncharacterized protein LOC103411669 [Malus domestica]	1.00835	4.12973	4.09551	2.03404	0.00216813	0.0377363
D8674_023718	gnl|WGS:SMOL|Pdr4g002910.1	GO:0000350(generation of catalytic spliceosome for second transesterification step);GO:0000384(first spliceosomal transesterification activity);GO:0000389(mRNA 3'-splice site recognition);GO:0000974(Prp19 complex);GO:0071012(catalytic step 1 spliceosome);GO:0071013(catalytic step 2 spliceosome);GO:0071014(post-mRNA release spliceosomal complex);GO:0071020(post-spliceosomal complex)	03040(Spliceosome)	K12870	NA	PREDICTED: pre-mRNA-splicing factor ISY1 homolog [Pyrus x bretschneideri]	1.93097	7.69078	3.98287	1.99381	0.00217637	0.0378448
D8674_037244	gnl|WGS:SMOL|Pdr0g007590.1	GO:0008270(zinc ion binding);GO:0009409(response to cold);GO:0009507(chloroplast);GO:0009570(chloroplast stroma);GO:0009579(thylakoid);GO:0009941(chloroplast envelope);GO:0010319(stromule);GO:0035671(enone reductase activity);GO:0035798(2-alkenal reductase (NADP+) activity);GO:0048046(apoplast);GO:0055114(oxidation-reduction process)	NA	NA	NA	PREDICTED: 2-methylene-furan-3-one reductase-like [Malus domestica]	6.78729	26.0896	3.84389	1.94257	0.00220373	0.03825
D8674_023293	gnl|WGS:SMOL|Pdr3g020930.1	GO:0005634(nucleus);GO:0005737(cytoplasm);GO:0005886(plasma membrane);GO:0007165(signal transduction);GO:0009638(phototropism);GO:0016567(protein ubiquitination)	03050(Proteasome)	K03063	NA	PREDICTED: root phototropism protein 2-like [Pyrus x bretschneideri]	29.6019	112.454	3.79888	1.92557	0.00221965	0.0384203
D8674_025994	gnl|WGS:SMOL|Pdr5g004700.1	GO:0003723(RNA binding);GO:0005634(nucleus);GO:0005730(nucleolus);GO:0005829(cytosol);GO:0009535(chloroplast thylakoid membrane)	03008(Ribosome biogenesis in eukaryotes)	K11128	NA	PREDICTED: putative H/ACA ribonucleoprotein complex subunit 1-like protein 1 [Malus domestica]	3.47004	13.5294	3.89893	1.96308	0.00227676	0.039193
D8674_026221	gnl|WGS:SMOL|Pdr5g006970.1	GO:0005737(cytoplasm);GO:0005773(vacuole);GO:0005783(endoplasmic reticulum);GO:0005811(lipid droplet);GO:0009555(pollen development);GO:0034389(lipid particle organization);GO:0045927(positive regulation of growth);GO:0080186(developmental vegetative growth);GO:1902584(positive regulation of response to water deprivation)	NA	NA	NA	PREDICTED: REF/SRPP-like protein At1g67360 [Pyrus x bretschneideri]	70.1592	265.974	3.79101	1.92258	0.00228537	0.0393054
D8674_003184	gnl|WGS:SMOL|Pdr10g013380.1	GO:0008150(biological_process);GO:0008483(transaminase activity);GO:0009507(chloroplast)	NA	NA	NA	PREDICTED: UV-B-induced protein At3g17800, chloroplastic [Pyrus x bretschneideri]	25.9568	98.2528	3.78524	1.92039	0.00229056	0.0393588
D8674_032616	gnl|WGS:SMOL|Pdr8g001620.1	GO:0003674(molecular_function);GO:0009507(chloroplast);GO:0009523(photosystem II);GO:0009535(chloroplast thylakoid membrane);GO:0015979(photosynthesis);GO:0016021(integral component of membrane)	NA	NA	NA	PREDICTED: uncharacterized protein LOC103927490 [Pyrus x bretschneideri]	5.57937	21.9804	3.93958	1.97804	0.00230023	0.0394891
D8674_040811	gnl|WGS:SMOL|Pdr0g043260.1	GO:0003674(molecular_function);GO:0008150(biological_process);GO:0009507(chloroplast);GO:0009535(chloroplast thylakoid membrane)	NA	NA	NA	hypothetical protein DVH24_023587 [Malus domestica]	16.1324	61.1453	3.79022	1.92228	0.00233801	0.0399558
D8674_038645	gnl|WGS:SMOL|Pdr0g021600.1	GO:0003677(DNA binding);GO:0005515(protein binding);GO:0005634(nucleus);GO:0006351(transcription, DNA-templated);GO:0006355(regulation of transcription, DNA-templated);GO:0010167(response to nitrate);GO:0015706(nitrate transport);GO:0071249(cellular response to nitrate);GO:0071705(nitrogen compound transport);GO:1901698(response to nitrogen compound)	03050(Proteasome)	K03029	NA	PREDICTED: uncharacterized protein LOC103962259 [Pyrus x bretschneideri]	3.14656	11.9608	3.80124	1.92647	0.00235393	0.0401915
D8674_019340	gnl|WGS:SMOL|Pdr17g012700.1	GO:0003674(molecular_function);GO:0009507(chloroplast);GO:0009534(chloroplast thylakoid);GO:0009535(chloroplast thylakoid membrane);GO:0009538(photosystem I reaction center);GO:0009579(thylakoid);GO:0009735(response to cytokinin);GO:0010287(plastoglobule);GO:0015979(photosynthesis);GO:0016020(membrane);GO:0016021(integral component of membrane)	00195(Photosynthesis)	K02695	NA	PREDICTED: photosystem I reaction center subunit VI-2, chloroplastic-like [Pyrus x bretschneideri]	49.9144	187.942	3.76529	1.91276	0.00236437	0.0402969
D8674_034049	gnl|WGS:SMOL|Pdr8g015950.1	GO:0003677(DNA binding);GO:0003700(DNA binding transcription factor activity);GO:0005515(protein binding);GO:0005634(nucleus);GO:0005829(cytosol);GO:0006355(regulation of transcription, DNA-templated);GO:0009416(response to light stimulus);GO:0009722(detection of cytokinin stimulus);GO:0071345(cellular response to cytokine stimulus)	NA	NA	NA	PREDICTED: homeobox protein knotted-1-like 3 isoform X1 [Pyrus x bretschneideri]	114.937	431.883	3.75757	1.9098	0.00237125	0.0403412
D8674_003155	gnl|WGS:SMOL|Pdr10g013090.1	GO:0003677(DNA binding);GO:0003700(DNA binding transcription factor activity);GO:0005634(nucleus);GO:0006351(transcription, DNA-templated);GO:0006355(regulation of transcription, DNA-templated);GO:0007275(multicellular organism development);GO:0009873(ethylene-activated signaling pathway);GO:0010337(regulation of salicylic acid metabolic process);GO:0016021(integral component of membrane);GO:1900…	NA	NA	NA	PREDICTED: ethylene-responsive transcription factor-like protein At4g13040 isoform X2 [Pyrus x bretschneideri]	7.8691	29.8335	3.79123	1.92266	0.00237416	0.0403422
D8674_031373	gnl|WGS:SMOL|Pdr7g012970.1	GO:0003993(acid phosphatase activity);GO:0004722(protein serine/threonine phosphatase activity);GO:0005576(extracellular region);GO:0005737(cytoplasm);GO:0016311(dephosphorylation);GO:0046872(metal ion binding)	03040(Spliceosome)	K12867	NA	hypothetical protein DVH24_023871 [Malus domestica]	10.3512	39.0216	3.76976	1.91447	0.0023769	0.0403422
D8674_007193	gnl|WGS:SMOL|Pdr11g024540.1	GO:0009507(chloroplast);GO:0009534(chloroplast thylakoid);GO:0009535(chloroplast thylakoid membrane);GO:0009543(chloroplast thylakoid lumen);GO:0009561(megagametogenesis);GO:0010027(thylakoid membrane organization);GO:0046872(metal ion binding);GO:0048564(photosystem I assembly)	03018(RNA degradation)	K12603	EC:3.1.13.4	PREDICTED: protein EMBRYO SAC DEVELOPMENT ARREST 3, chloroplastic [Malus domestica]	6.49883	24.7896	3.81448	1.93149	0.00238183	0.0403755
D8674_016404	gnl|WGS:SMOL|Pdr16g008090.1	GO:0005739(mitochondrion);GO:0005777(peroxisome);GO:0008935(1,4-dihydroxy-2-naphthoyl-CoA synthase activity);GO:0009234(menaquinone biosynthetic process);GO:0042371(vitamin K biosynthetic process)	00130(Ubiquinone and other terpenoid-quinone biosynthesis)	K01661	EC:4.1.3.36	PREDICTED: 1,4-dihydroxy-2-naphthoyl-CoA synthase, peroxisomal [Malus domestica]	3.24699	12.442	3.83185	1.93804	0.002413	0.0407332
D8674_002073	gnl|WGS:SMOL|Pdr10g002270.1	GO:0005509(calcium ion binding);GO:0009507(chloroplast);GO:0009534(chloroplast thylakoid);GO:0009535(chloroplast thylakoid membrane);GO:0009543(chloroplast thylakoid lumen);GO:0009570(chloroplast stroma);GO:0009579(thylakoid);GO:0009654(photosystem II oxygen evolving complex);GO:0015979(photosynthesis);GO:0019898(extrinsic component of membrane);GO:0030095(chloroplast photosystem II);GO:0031977(t…	00195(Photosynthesis)	K08901	NA	hypothetical protein DVH24_017072 [Malus domestica]	31.442	118.054	3.75466	1.90868	0.00241743	0.0407593
D8674_014537	gnl|WGS:SMOL|Pdr15g018290.1	GO:0003674(molecular_function);GO:0005739(mitochondrion);GO:0016021(integral component of membrane)	NA	NA	NA	PREDICTED: early nodulin-93-like [Pyrus x bretschneideri]	90.6344	338.482	3.73459	1.90095	0.00248171	0.0416579
D8674_016696	gnl|WGS:SMOL|Pdr16g011010.1	GO:0005783(endoplasmic reticulum);GO:0005886(plasma membrane);GO:0008398(sterol 14-demethylase activity);GO:0016126(sterol biosynthetic process)	00100(Steroid biosynthesis)	K05917	EC:1.14.13.70	PREDICTED: sterol 14-demethylase-like [Pyrus x bretschneideri]	10.9065	40.8922	3.74933	1.90663	0.0024996	0.0418456
D8674_019675	gnl|WGS:SMOL|Pdr17g016050.1	NA	NA	NA	NA	-	2.53425	9.8429	3.88395	1.95753	0.00251877	0.0420917
D8674_024932	gnl|WGS:SMOL|Pdr4g015050.1	GO:0005829(cytosol);GO:0009611(response to wounding);GO:0016787(hydrolase activity);GO:0046872(metal ion binding)	NA	NA	NA	PREDICTED: nudix hydrolase 8 [Pyrus x bretschneideri]	7.04507	26.4075	3.74837	1.90626	0.00257733	0.0428804
D8674_026029	gnl|WGS:SMOL|Pdr5g005050.1	GO:0004420(hydroxymethylglutaryl-CoA reductase (NADPH) activity);GO:0005778(peroxisomal membrane);GO:0005789(endoplasmic reticulum membrane);GO:0008299(isoprenoid biosynthetic process);GO:0016126(sterol biosynthetic process)	00900(Terpenoid backbone biosynthesis)	K00021	EC:1.1.1.34	3-hydroxy-3-methylglutaryl-coenzyme A reductase 1-like [Malus domestica]	32.3515	120.791	3.73372	1.90061	0.00258217	0.0429091
D8674_012909	gnl|WGS:SMOL|Pdr15g002010.1	GO:0005515(protein binding);GO:0005634(nucleus);GO:0006883(cellular sodium ion homeostasis);GO:0030007(cellular potassium ion homeostasis);GO:0043433(negative regulation of DNA binding transcription factor activity);GO:1901001(negative regulation of response to salt stress)	NA	NA	NA	PREDICTED: VQ motif-containing protein 9 [Pyrus x bretschneideri]	12.4801	46.4673	3.72332	1.89659	0.00258396	0.0429091
D8674_032069	gnl|WGS:SMOL|Pdr7g019930.1	GO:0004683(calmodulin-dependent protein kinase activity);GO:0005516(calmodulin binding);GO:0005634(nucleus);GO:0005737(cytoplasm);GO:0005886(plasma membrane);GO:0009738(abscisic acid-activated signaling pathway);GO:0009931(calcium-dependent protein serine/threonine kinase activity);GO:0018105(peptidyl-serine phosphorylation);GO:0035556(intracellular signal transduction);GO:0046777(protein autopho…	NA	NA	NA	PREDICTED: calcium-dependent protein kinase 26-like isoform X1 [Malus domestica]	20.1907	74.9739	3.71328	1.8927	0.00258587	0.0429091
D8674_015539	gnl|WGS:SMOL|Pdr15g028310.1	GO:0005634(nucleus);GO:0006355(regulation of transcription, DNA-templated);GO:0044212(transcription regulatory region DNA binding)	04075(Plant hormone signal transduction)	K14491	NA	PREDICTED: probable transcription factor KAN4 [Pyrus x bretschneideri]	0.861321	3.3654	3.90725	1.96616	0.00259124	0.0429605
D8674_038889	gnl|WGS:SMOL|Pdr0g024040.1	GO:0000287(magnesium ion binding);GO:0004743(pyruvate kinase activity);GO:0005737(cytoplasm);GO:0005829(cytosol);GO:0006096(glycolytic process);GO:0016301(kinase activity);GO:0030955(potassium ion binding)	00010(Glycolysis / Gluconeogenesis);00620(Pyruvate metabolism);00230(Purine metabolism)	K00873	EC:2.7.1.40	hypothetical protein DVH24_037985 [Malus domestica]	257.978	955.636	3.70433	1.88921	0.00260214	0.0431033
D8674_022355	gnl|WGS:SMOL|Pdr3g011550.1	GO:0008150(biological_process);GO:0009507(chloroplast)	NA	NA	NA	PREDICTED: uncharacterized protein LOC103429520 [Malus domestica]	1.51828	5.92865	3.90485	1.96527	0.00260965	0.0431518
D8674_023758	gnl|WGS:SMOL|Pdr4g003310.1	GO:0005515(protein binding);GO:0005634(nucleus);GO:0006351(transcription, DNA-templated);GO:0006355(regulation of transcription, DNA-templated);GO:0010072(primary shoot apical meristem specification)	NA	NA	NA	PREDICTED: topless-related protein 3 isoform X2 [Pyrus x bretschneideri]	30.1916	111.775	3.70218	1.88838	0.00261931	0.0432737
D8674_040282	gnl|WGS:SMOL|Pdr0g037970.1	GO:0005524(ATP binding);GO:0005618(cell wall);GO:0005634(nucleus);GO:0005739(mitochondrion);GO:0005774(vacuolar membrane);GO:0005794(Golgi apparatus);GO:0005829(cytosol);GO:0005886(plasma membrane);GO:0006351(transcription, DNA-templated);GO:0006355(regulation of transcription, DNA-templated);GO:0006457(protein folding);GO:0006986(response to unfolded protein);GO:0009266(response to temperature s…	03040(Spliceosome);04141(Protein processing in endoplasmic reticulum);04144(Endocytosis)	K03283	NA	PREDICTED: heat shock 70 kDa protein-like [Pyrus x bretschneideri]	0.564729	2.20695	3.90799	1.96643	0.00262402	0.0432782
D8674_014862	gnl|WGS:SMOL|Pdr15g021540.1	GO:0005829(cytosol);GO:0009226(nucleotide-sugar biosynthetic process);GO:0070569(uridylyltransferase activity)	00040(Pentose and glucuronate interconversions);00052(Galactose metabolism);00053(Ascorbate and aldarate metabolism);00520(Amino sugar and nucleotide sugar metabolism)	K12447	EC:2.7.7.64	PREDICTED: UDP-sugar pyrophosphorylase-like [Pyrus x bretschneideri]	66.3038	245.293	3.69953	1.88734	0.00262923	0.0433237
D8674_016062	gnl|WGS:SMOL|Pdr16g004670.1	GO:0004430(1-phosphatidylinositol 4-kinase activity);GO:0005524(ATP binding);GO:0005575(cellular_component);GO:0016301(kinase activity);GO:0016310(phosphorylation);GO:0046777(protein autophosphorylation);GO:0046854(phosphatidylinositol phosphorylation)	03008(Ribosome biogenesis in eukaryotes)	K14544	NA	PREDICTED: phosphatidylinositol 4-kinase gamma 7 [Pyrus x bretschneideri]	113.263	418.248	3.69271	1.88468	0.00265685	0.0436644
D8674_007115	gnl|WGS:SMOL|Pdr11g023760.1	GO:0005524(ATP binding);GO:0005739(mitochondrion);GO:0006952(defense response);GO:0043531(ADP binding)	04626(Plant-pathogen interaction)	K13459	NA	hypothetical protein DVH24_042012 [Malus domestica]	0.366927	1.42796	3.89166	1.96039	0.0026705	0.0438124
D8674_031365	gnl|WGS:SMOL|Pdr7g012890.1	GO:0003677(DNA binding);GO:0003700(DNA binding transcription factor activity);GO:0005634(nucleus);GO:0005737(cytoplasm);GO:0006351(transcription, DNA-templated);GO:0007275(multicellular organism development);GO:0009644(response to high light intensity);GO:0009962(regulation of flavonoid biosynthetic process);GO:0016021(integral component of membrane);GO:0045893(positive regulation of transcriptio…	03010(Ribosome)	K02982	NA	PREDICTED: NAC domain-containing protein 62-like isoform X1 [Pyrus x bretschneideri]	1.23711	4.62265	3.73664	1.90174	0.00267651	0.0438729
D8674_034040	gnl|WGS:SMOL|Pdr8g015860.1	GO:0005929(cilium);GO:0035091(phosphatidylinositol binding);GO:0061512(protein localization to cilium)	NA	NA	NA	PREDICTED: tubby-like F-box protein 5 [Pyrus x bretschneideri]	2.85481	10.9526	3.83656	1.93981	0.00268482	0.0439223
D8674_014052	gnl|WGS:SMOL|Pdr15g013440.1	GO:0000139(Golgi membrane);GO:0000306(extrinsic component of vacuolar membrane);GO:0005515(protein binding);GO:0005576(extracellular region);GO:0005783(endoplasmic reticulum);GO:0006886(intracellular protein transport);GO:0008233(peptidase activity);GO:0008270(zinc ion binding);GO:0016021(integral component of membrane);GO:0031902(late endosome membrane);GO:0032586(protein storage vacuole membran…	NA	NA	NA	hypothetical protein DVH24_018486 [Malus domestica]	1.97036	7.4645	3.78839	1.92159	0.00268651	0.0439223
D8674_036464	gnl|WGS:SMOL|Pdr9g019230.1	GO:0003723(RNA binding);GO:0003725(double-stranded RNA binding);GO:0005515(protein binding);GO:0008150(biological_process)	NA	NA	NA	PREDICTED: double-stranded RNA-binding protein 3-like [Pyrus x bretschneideri]	0.939505	3.68324	3.9204	1.971	0.0027471	0.0446806
D8674_007674	gnl|WGS:SMOL|Pdr12g003820.1	GO:0004040(amidase activity);GO:0005654(nucleoplasm);GO:0005737(cytoplasm);GO:0005829(cytosol);GO:0009684(indoleacetic acid biosynthetic process);GO:0009851(auxin biosynthetic process);GO:0016810(hydrolase activity, acting on carbon-nitrogen (but not peptide) bonds);GO:0043864(indoleacetamide hydrolase activity)	00330(Arginine and proline metabolism);00360(Phenylalanine metabolism);00380(Tryptophan metabolism)	K01426	EC:3.5.1.4	PREDICTED: amidase 1-like isoform X3 [Pyrus x bretschneideri]	40.1542	147.675	3.67769	1.8788	0.0027505	0.0446974
D8674_001435	gnl|WGS:SMOL|Pdr1g014350.1	GO:0005515(protein binding);GO:0005516(calmodulin binding);GO:0005783(endoplasmic reticulum);GO:0005829(cytosol);GO:0005886(plasma membrane);GO:0006457(protein folding);GO:0009506(plasmodesma);GO:0009507(chloroplast);GO:0034605(cellular response to heat);GO:0034620(cellular response to unfolded protein);GO:0043207(response to external biotic stimulus);GO:0051087(chaperone binding);GO:0070417(cell…	NA	NA	NA	PREDICTED: BAG family molecular chaperone regulator 7-like [Pyrus x bretschneideri]	1.5503	5.86672	3.78425	1.92001	0.00275404	0.0447163
D8674_027146	gnl|WGS:SMOL|Pdr5g016220.1	GO:0005524(ATP binding);GO:0005739(mitochondrion);GO:0008150(biological_process)	NA	NA	NA	PREDICTED: uncharacterized protein LOC103435893 [Malus domestica]	0.99005	3.8343	3.87284	1.95339	0.00278001	0.0450605
D8674_033431	gnl|WGS:SMOL|Pdr8g009770.1	GO:0005351(carbohydrate:proton symporter activity);GO:0005773(vacuole);GO:0005801(cis-Golgi network);GO:0005886(plasma membrane);GO:0005887(integral component of plasma membrane);GO:0005985(sucrose metabolic process);GO:0008506(sucrose:proton symporter activity);GO:0008515(sucrose transmembrane transporter activity);GO:0015144(carbohydrate transmembrane transporter activity);GO:0015293(symporter …	NA	NA	NA	PREDICTED: sucrose transport protein SUC4-like isoform X1 [Pyrus x bretschneideri]	12.7492	46.8193	3.67232	1.87669	0.00279664	0.0452376
D8674_017986	gnl|WGS:SMOL|Pdr16g023910.1	GO:0005634(nucleus);GO:0009507(chloroplast);GO:0042254(ribosome biogenesis)	NA	NA	NA	PREDICTED: uncharacterized protein LOC103938151 isoform X1 [Pyrus x bretschneideri]	1.84561	7.06517	3.8281	1.93663	0.00281051	0.04536
D8674_038961	gnl|WGS:SMOL|Pdr0g024760.1	NA	NA	NA	NA	hypothetical protein DVH24_038127 [Malus domestica]	1.53527	5.76761	3.75674	1.90948	0.00282894	0.0456184
D8674_022836	gnl|WGS:SMOL|Pdr3g016360.1	GO:0009507(chloroplast);GO:0009535(chloroplast thylakoid membrane);GO:0010270(photosystem II oxygen evolving complex assembly);GO:0016021(integral component of membrane)	NA	NA	NA	PREDICTED: protein LOW PSII ACCUMULATION 1, chloroplastic-like isoform X1 [Pyrus x bretschneideri]	0.614331	2.43733	3.96745	1.98821	0.00286825	0.0461734
D8674_003984	gnl|WGS:SMOL|Pdr10g021380.1	GO:0005515(protein binding);GO:0005634(nucleus);GO:0005829(cytosol);GO:0009507(chloroplast);GO:0009793(embryo development ending in seed dormancy);GO:0010183(pollen tube guidance);GO:0036033(mediator complex binding);GO:0050832(defense response to fungus)	NA	NA	NA	PREDICTED: CCG-binding protein 1-like [Pyrus x bretschneideri]	860.093	3119.54	3.62698	1.85877	0.00298246	0.0476388
D8674_039969	gnl|WGS:SMOL|Pdr0g034840.1	NA	NA	NA	NA	hypothetical protein DVH24_042243 [Malus domestica]	51.0671	185.719	3.63675	1.86265	0.00301011	0.0479659
D8674_015152	gnl|WGS:SMOL|Pdr15g024440.1	GO:0005886(plasma membrane)	NA	NA	NA	PREDICTED: uncharacterized protein LOC103957459 [Pyrus x bretschneideri]	1.1259	4.27446	3.79648	1.92466	0.00305566	0.0485279
D8674_013324	gnl|WGS:SMOL|Pdr15g006160.1	GO:0005886(plasma membrane);GO:0009416(response to light stimulus);GO:0010087(phloem or xylem histogenesis);GO:0010305(leaf vascular tissue pattern formation);GO:0010588(cotyledon vascular tissue pattern formation);GO:0016567(protein ubiquitination);GO:0048367(shoot system development);GO:0080022(primary root development)	NA	NA	NA	PREDICTED: BTB/POZ domain-containing protein DOT3-like [Pyrus x bretschneideri]	0.877265	3.2992	3.76078	1.91103	0.00308489	0.0488686
D8674_025107	gnl|WGS:SMOL|Pdr4g016800.1	GO:0009507(chloroplast);GO:0010019(chloroplast-nucleus signaling pathway);GO:0015995(chlorophyll biosynthetic process);GO:0019899(enzyme binding);GO:0031969(chloroplast membrane);GO:0043085(positive regulation of catalytic activity);GO:0046906(tetrapyrrole binding)	NA	NA	NA	PREDICTED: tetrapyrrole-binding protein, chloroplastic [Pyrus x bretschneideri]	4.68779	17.1151	3.651	1.86829	0.00309547	0.048981
D8674_012924	gnl|WGS:SMOL|Pdr15g002160.1	GO:0004842(ubiquitin-protein transferase activity);GO:0005515(protein binding);GO:0005634(nucleus);GO:0006511(ubiquitin-dependent protein catabolic process);GO:0009737(response to abscisic acid);GO:0010608(posttranscriptional regulation of gene expression);GO:0010629(negative regulation of gene expression);GO:0016567(protein ubiquitination)	NA	NA	NA	PREDICTED: F-box protein FBW2-like [Pyrus x bretschneideri]	8.01954	29.131	3.6325	1.86096	0.00309977	0.048981
D8674_014783	gnl|WGS:SMOL|Pdr15g020750.1	GO:0004842(ubiquitin-protein transferase activity);GO:0019005(SCF ubiquitin ligase complex);GO:0031146(SCF-dependent proteasomal ubiquitin-dependent protein catabolic process)	NA	NA	NA	PREDICTED: F-box/kelch-repeat protein At3g23880-like isoform X3 [Pyrus x bretschneideri]	4.09818	14.9775	3.65467	1.86974	0.0031159	0.0491537
D8674_039075	gnl|WGS:SMOL|Pdr0g025900.1	GO:0000148(1,3-beta-D-glucan synthase complex);GO:0003843(1,3-beta-D-glucan synthase activity);GO:0005886(plasma membrane)	NA	NA	NA	PREDICTED: callose synthase 3-like [Pyrus x bretschneideri]	3.08077	11.1351	3.61438	1.85375	0.00312715	0.0492076
D8674_021954	gnl|WGS:SMOL|Pdr3g007540.1	GO:0003674(molecular_function);GO:0009507(chloroplast);GO:0009535(chloroplast thylakoid membrane);GO:0009543(chloroplast thylakoid lumen);GO:0009611(response to wounding);GO:0010193(response to ozone);GO:0010224(response to UV-B);GO:0030095(chloroplast photosystem II)	NA	NA	NA	PREDICTED: photosystem II 5 kDa protein, chloroplastic-like [Pyrus x bretschneideri]	22.8821	82.7356	3.61574	1.85429	0.00314964	0.0495202
D8674_024935	gnl|WGS:SMOL|Pdr4g015080.1	GO:0003677(DNA binding);GO:0003700(DNA binding transcription factor activity);GO:0005622(intracellular);GO:0005634(nucleus);GO:0006351(transcription, DNA-templated);GO:0006355(regulation of transcription, DNA-templated);GO:0006952(defense response);GO:0009409(response to cold);GO:0009873(ethylene-activated signaling pathway);GO:0010200(response to chitin);GO:0043565(sequence-specific DNA binding)…	NA	NA	NA	PREDICTED: ethylene-responsive transcription factor 5-like [Pyrus x bretschneideri]	51.0434	183.655	3.59801	1.8472	0.00315906	0.049627
D8674_006824	gnl|WGS:SMOL|Pdr11g020850.1	GO:0005634(nucleus);GO:0006813(potassium ion transport);GO:0008324(cation transmembrane transporter activity);GO:0009507(chloroplast);GO:0009941(chloroplast envelope);GO:0016021(integral component of membrane)	NA	NA	NA	hypothetical protein DVH24_001750 [Malus domestica]	1.09397	4.18886	3.82905	1.93699	0.00317415	0.0497744
D8674_019936	gnl|WGS:SMOL|Pdr17g018660.1	GO:0005524(ATP binding);GO:0005634(nucleus);GO:0016301(kinase activity);GO:0016310(phosphorylation)	NA	NA	NA	PREDICTED: serine/threonine-protein kinase EDR1-like isoform X1 [Pyrus x bretschneideri]	40.8859	146.879	3.5924	1.84495	0.00317636	0.0497744
D8674_041966	gnl|WGS:SMOL|Pdr0g054810.1	GO:0004475(mannose-1-phosphate guanylyltransferase activity);GO:0005515(protein binding);GO:0005525(GTP binding);GO:0005634(nucleus);GO:0005737(cytoplasm);GO:0005829(cytosol);GO:0009058(biosynthetic process);GO:0009298(GDP-mannose biosynthetic process);GO:0009408(response to heat);GO:0009651(response to salt stress);GO:0009753(response to jasmonic acid);GO:0010193(response to ozone);GO:0016779(nu…	00051(Fructose and mannose metabolism);00520(Amino sugar and nucleotide sugar metabolism)	K00966	EC:2.7.7.13	PREDICTED: mannose-1-phosphate guanylyltransferase 1-like [Pyrus x bretschneideri]	29.1607	104.888	3.59692	1.84676	0.00318319	0.0498401
D8674_026684	gnl|WGS:SMOL|Pdr5g011600.1	GO:0005887(integral component of plasma membrane);GO:0009705(plant-type vacuole membrane);GO:0009992(cellular water homeostasis);GO:0015250(water channel activity);GO:0015254(glycerol channel activity);GO:0034220(ion transmembrane transport);GO:0042807(central vacuole)	04075(Plant hormone signal transduction)	K14488	NA	hypothetical protein PRUPE_8G157900 [Prunus persica]	5.73739	21.5254	3.75178	1.90757	0.00323097	0.0505043
D8674_029182	gnl|WGS:SMOL|Pdr6g009900.1	GO:0005634(nucleus);GO:0005884(actin filament);GO:0009055(electron transfer activity);GO:0009902(chloroplast relocation);GO:0015035(protein disulfide oxidoreductase activity);GO:0045454(cell redox homeostasis);GO:0051017(actin filament bundle assembly)	NA	NA	NA	PREDICTED: uncharacterized protein LOC103949336 [Pyrus x bretschneideri]	4.14338	14.9746	3.61411	1.85364	0.00324276	0.0506467
D8674_010598	gnl|WGS:SMOL|Pdr13g012780.1	GO:0009705(plant-type vacuole membrane)	NA	NA	NA	hypothetical protein DVH24_017726 [Malus domestica]	2.13123	8.30846	3.89844	1.9629	0.00326197	0.0509045
D8674_001061	gnl|WGS:SMOL|Pdr1g010610.1	GO:0005737(cytoplasm);GO:0005886(plasma membrane);GO:0006508(proteolysis);GO:0008270(zinc ion binding);GO:0042277(peptide binding);GO:0043171(peptide catabolic process);GO:0070006(metalloaminopeptidase activity)	00590(Arachidonic acid metabolism)	K01254	EC:3.3.2.6	hypothetical protein DVH24_023209 [Malus domestica]	54.9362	196.52	3.57724	1.83885	0.00327325	0.0509878
D8674_014131	gnl|WGS:SMOL|Pdr15g014230.1	GO:0004672(protein kinase activity);GO:0004674(protein serine/threonine kinase activity);GO:0005524(ATP binding);GO:0005886(plasma membrane);GO:0006468(protein phosphorylation);GO:0016021(integral component of membrane);GO:0016301(kinase activity);GO:0030246(carbohydrate binding)	NA	NA	NA	PREDICTED: probable L-type lectin-domain containing receptor kinase S.5 [Pyrus x bretschneideri]	1.37472	5.06339	3.68322	1.88097	0.00328513	0.0510969
D8674_004893	gnl|WGS:SMOL|Pdr11g001540.1	GO:0000045(autophagosome assembly);GO:0000422(autophagy of mitochondrion);GO:0005829(cytosol);GO:0006497(protein lipidation);GO:0019898(extrinsic component of membrane);GO:0032266(phosphatidylinositol-3-phosphate binding);GO:0034045(phagophore assembly site membrane);GO:0034497(protein localization to phagophore assembly site);GO:0044804(autophagy of nucleus);GO:0080025(phosphatidylinositol-3,5-b…	NA	NA	NA	autophagy-related protein 18a-like [Malus domestica]	40.4195	144.377	3.57196	1.83672	0.00330713	0.0513545
D8674_014824	gnl|WGS:SMOL|Pdr15g021160.1	GO:0008942(nitrite reductase [NAD(P)H] activity);GO:0009507(chloroplast);GO:0009534(chloroplast thylakoid);GO:0009535(chloroplast thylakoid membrane);GO:0009941(chloroplast envelope);GO:0010207(photosystem II assembly);GO:0042128(nitrate assimilation);GO:0042549(photosystem II stabilization);GO:0051537(2 iron, 2 sulfur cluster binding);GO:0055114(oxidation-reduction process)	NA	NA	NA	PREDICTED: uncharacterized protein LOC103431352 [Malus domestica]	14.9242	53.3833	3.57696	1.83873	0.00337077	0.0520428
D8674_041997	gnl|WGS:SMOL|Pdr0g055120.1	GO:0004175(endopeptidase activity);GO:0005634(nucleus);GO:0016926(protein desumoylation);GO:0016929(SUMO-specific protease activity)	NA	NA	NA	PREDICTED: uncharacterized protein LOC103950231 isoform X1 [Pyrus x bretschneideri]	2.37736	8.53029	3.58814	1.84323	0.00338222	0.0521769
D8674_032484	gnl|WGS:SMOL|Pdr8g000300.1	GO:0003674(molecular_function);GO:0005739(mitochondrion);GO:0008150(biological_process)	NA	NA	NA	PREDICTED: uncharacterized protein LOC103963987 [Pyrus x bretschneideri]	51.5221	183.523	3.56203	1.8327	0.0033866	0.0521939
D8674_023701	gnl|WGS:SMOL|Pdr4g002740.1	GO:0005515(protein binding);GO:0005634(nucleus);GO:0006351(transcription, DNA-templated);GO:0006355(regulation of transcription, DNA-templated);GO:0010072(primary shoot apical meristem specification)	NA	NA	NA	PREDICTED: topless-related protein 3-like isoform X1 [Malus domestica]	13.2327	47.1138	3.56041	1.83204	0.003393	0.0522151
D8674_002748	gnl|WGS:SMOL|Pdr10g009020.1	GO:0000139(Golgi membrane);GO:0016021(integral component of membrane);GO:0016757(transferase activity, transferring glycosyl groups);GO:0042546(cell wall biogenesis);GO:0071555(cell wall organization)	NA	NA	NA	PREDICTED: galactan beta-1,4-galactosyltransferase GALS3 [Malus domestica]	0.806399	3.01801	3.74258	1.90403	0.00342636	0.0525143
D8674_035009	gnl|WGS:SMOL|Pdr9g004680.1	GO:0004386(helicase activity);GO:0005634(nucleus)	NA	NA	NA	PREDICTED: uncharacterized protein LOC103964285 [Pyrus x bretschneideri]	32.0318	113.721	3.55026	1.82792	0.00344231	0.052716
D8674_015288	gnl|WGS:SMOL|Pdr15g025800.1	GO:0005634(nucleus);GO:0005737(cytoplasm);GO:0016925(protein sumoylation);GO:0019789(SUMO transferase activity);GO:0031625(ubiquitin protein ligase binding);GO:0061630(ubiquitin protein ligase activity)	03013(RNA transport);04120(Ubiquitin mediated proteolysis)	K10577	NA	SUMO-conjugating enzyme SCE1 [Vitis vinifera]	3.1147	11.4058	3.66192	1.8726	0.00357914	0.0545898
D8674_039496	gnl|WGS:SMOL|Pdr0g030110.1	NA	NA	NA	NA	PREDICTED: uncharacterized protein LOC103933723 [Pyrus x bretschneideri]	348.873	1229.58	3.52443	1.81739	0.00359289	0.0547553
D8674_017967	gnl|WGS:SMOL|Pdr16g023720.1	GO:0003674(molecular_function);GO:0005575(cellular_component);GO:0008150(biological_process)	NA	NA	NA	hypothetical protein DVH24_033647 [Malus domestica]	164.029	576.829	3.51662	1.81419	0.00364785	0.0554138
D8674_016600	gnl|WGS:SMOL|Pdr16g010050.1	GO:0005737(cytoplasm);GO:0005773(vacuole);GO:0005783(endoplasmic reticulum);GO:0005811(lipid droplet);GO:0009555(pollen development);GO:0034389(lipid particle organization);GO:0045927(positive regulation of growth);GO:0080186(developmental vegetative growth);GO:1902584(positive regulation of response to water deprivation)	NA	NA	NA	PREDICTED: REF/SRPP-like protein At1g67360 [Pyrus x bretschneideri]	62.4825	219.595	3.5145	1.81332	0.00366506	0.0556305
D8674_017966	gnl|WGS:SMOL|Pdr16g023710.1	NA	NA	NA	NA	hypothetical protein DVH24_033634 [Malus domestica]	177.615	623.926	3.5128	1.81262	0.00368612	0.0559052
D8674_009138	gnl|WGS:SMOL|Pdr12g018460.1	GO:0005634(nucleus);GO:0005829(cytosol);GO:0007338(single fertilization);GO:0009846(pollen germination);GO:0009860(pollen tube growth);GO:0016740(transferase activity)	NA	NA	NA	PREDICTED: protein CDI-like [Pyrus x bretschneideri]	6.59685	23.3527	3.53998	1.82374	0.00369008	0.0559203
D8674_007972	gnl|WGS:SMOL|Pdr12g006800.1	GO:0005737(cytoplasm);GO:0006607(NLS-bearing protein import into nucleus);GO:0006610(ribosomal protein import into nucleus);GO:0008139(nuclear localization sequence binding);GO:0031965(nuclear membrane);GO:0034399(nuclear periphery)	03013(RNA transport)	K14293	NA	PREDICTED: importin subunit beta-1-like [Malus domestica]	2.72713	9.6138	3.52525	1.81772	0.0037042	0.0560496
D8674_035302	gnl|WGS:SMOL|Pdr9g007610.1	GO:0003676(nucleic acid binding);GO:0003677(DNA binding);GO:0003700(DNA binding transcription factor activity);GO:0005634(nucleus);GO:0006351(transcription, DNA-templated);GO:0006355(regulation of transcription, DNA-templated);GO:0008270(zinc ion binding);GO:0046872(metal ion binding)	00052(Galactose metabolism);00600(Sphingolipid metabolism);00531(Glycosaminoglycan degradation);00604(Glycosphingolipid biosynthesis - ganglio series);00511(Other glycan degradation)	K12309	EC:3.2.1.23	PREDICTED: protein indeterminate-domain 7 isoform X1 [Pyrus x bretschneideri]	3.81965	13.628	3.56786	1.83506	0.00370506	0.0560496
D8674_009130	gnl|WGS:SMOL|Pdr12g018380.1	NA	NA	NA	NA	hypothetical protein DVH24_034999 [Malus domestica]	14.1909	50.1468	3.53373	1.82119	0.0037105	0.0560496
D8674_014602	gnl|WGS:SMOL|Pdr15g018940.1	GO:0003700(DNA binding transcription factor activity);GO:0005634(nucleus);GO:0006355(regulation of transcription, DNA-templated);GO:0007275(multicellular organism development);GO:0046872(metal ion binding)	NA	NA	NA	PREDICTED: protein tesmin/TSO1-like CXC 5 [Pyrus x bretschneideri]	2.90155	10.2519	3.53324	1.82099	0.00376516	0.0566486
D8674_010149	gnl|WGS:SMOL|Pdr13g008290.1	GO:0003735(structural constituent of ribosome);GO:0005840(ribosome);GO:0006412(translation);GO:0009507(chloroplast);GO:0009570(chloroplast stroma);GO:0009941(chloroplast envelope);GO:0016020(membrane);GO:0022625(cytosolic large ribosomal subunit)	03010(Ribosome)	K02902	NA	hypothetical protein DVH24_001908 [Malus domestica]	1.53642	5.72094	3.72356	1.89668	0.00382605	0.0574272
D8674_001232	gnl|WGS:SMOL|Pdr1g012320.1	GO:0009813(flavonoid biosynthetic process);GO:0043231(intracellular membrane-bounded organelle);GO:0052696(flavonoid glucuronidation);GO:0080043(quercetin 3-O-glucosyltransferase activity);GO:0080044(quercetin 7-O-glucosyltransferase activity)	00908(Zeatin biosynthesis)	K13493	EC:2.4.1.-	PREDICTED: UDP-glycosyltransferase 76F1-like isoform X1 [Pyrus x bretschneideri]	1.20212	4.38854	3.65066	1.86816	0.003858	0.057637
D8674_029095	gnl|WGS:SMOL|Pdr6g009030.1	GO:0005384(manganese ion transmembrane transporter activity);GO:0006816(calcium ion transport);GO:0006828(manganese ion transport);GO:0009507(chloroplast);GO:0009535(chloroplast thylakoid membrane);GO:0010270(photosystem II oxygen evolving complex assembly);GO:0015095(magnesium ion transmembrane transporter activity);GO:0016021(integral component of membrane);GO:0031969(chloroplast membrane)	NA	NA	NA	PREDICTED: GDT1-like protein 1, chloroplastic isoform X1 [Pyrus x bretschneideri]	1.47062	5.2953	3.60074	1.84829	0.00385835	0.057637
D8674_017071	gnl|WGS:SMOL|Pdr16g014760.1	GO:0009543(chloroplast thylakoid lumen);GO:0010206(photosystem II repair);GO:0010207(photosystem II assembly)	NA	NA	NA	PREDICTED: photosystem II D1 precursor processing protein PSB27-H2, chloroplastic [Pyrus x bretschneideri]	1.50802	5.43141	3.60168	1.84867	0.00389644	0.0579999
D8674_039926	gnl|WGS:SMOL|Pdr0g034410.1	GO:0005737(cytoplasm);GO:0030001(metal ion transport);GO:0046914(transition metal ion binding);GO:0046916(cellular transition metal ion homeostasis)	NA	NA	NA	PREDICTED: chitin-binding lectin 1-like isoform X2 [Pyrus x bretschneideri]	5.81159	20.4428	3.51759	1.81459	0.00389801	0.0579999
D8674_038974	gnl|WGS:SMOL|Pdr0g024890.1	GO:0003677(DNA binding);GO:0005524(ATP binding);GO:0005634(nucleus)	NA	NA	NA	PREDICTED: mitochondrial import receptor subunit TOM20-like [Pyrus x bretschneideri]	1.4497	5.13145	3.53967	1.82361	0.00397721	0.0588996
D8674_037314	gnl|WGS:SMOL|Pdr0g008290.1	GO:0003674(molecular_function);GO:0005634(nucleus);GO:0008150(biological_process)	NA	NA	NA	PREDICTED: uncharacterized protein LOC103947325 [Pyrus x bretschneideri]	0.963702	3.45923	3.58952	1.84379	0.0041124	0.0602464
D8674_010742	gnl|WGS:SMOL|Pdr13g014220.1	GO:0003674(molecular_function);GO:0005634(nucleus);GO:0005886(plasma membrane);GO:0008150(biological_process)	NA	NA	NA	hypothetical protein DVH24_000687 [Malus domestica]	5.43168	18.9132	3.48202	1.79992	0.00413824	0.0604772
D8674_007245	gnl|WGS:SMOL|Pdr11g025060.1	GO:0009055(electron transfer activity);GO:0009507(chloroplast);GO:0009536(plastid);GO:0009706(chloroplast inner membrane);GO:0009941(chloroplast envelope);GO:0010277(chlorophyllide a oxygenase [overall] activity);GO:0015031(protein transport);GO:0016021(integral component of membrane);GO:0046872(metal ion binding);GO:0051537(2 iron, 2 sulfur cluster binding);GO:0055114(oxidation-reduction process)	00860(Porphyrin and chlorophyll metabolism)	K13071	EC:1.14.15.17	hypothetical protein PRUPE_6G005300 [Prunus persica]	9.30201	32.2126	3.46298	1.79201	0.00415448	0.0606677
D8674_028330	gnl|WGS:SMOL|Pdr6g001380.1	GO:0005634(nucleus)	03030(DNA replication);03420(Nucleotide excision repair);03430(Mismatch repair);03440(Homologous recombination)	K07466	NA	PREDICTED: replication protein A 70 kDa DNA-binding subunit E [Pyrus x bretschneideri]	6.26029	21.625	3.45431	1.7884	0.00416949	0.0607928
D8674_027515	gnl|WGS:SMOL|Pdr5g019910.1	GO:0003677(DNA binding);GO:0005515(protein binding);GO:0005524(ATP binding);GO:0005634(nucleus);GO:0006268(DNA unwinding involved in DNA replication);GO:0006270(DNA replication initiation);GO:0008094(DNA-dependent ATPase activity)	03030(DNA replication)	K02542	EC:3.6.4.12	PREDICTED: DNA replication licensing factor MCM6-like [Pyrus x bretschneideri]	1.41976	5.00674	3.52646	1.81822	0.00418541	0.0608968
D8674_030319	gnl|WGS:SMOL|Pdr7g002430.1	GO:0003955(NAD(P)H dehydrogenase (quinone) activity);GO:0005829(cytosol);GO:0005886(plasma membrane);GO:0008752(FMN reductase activity);GO:0009507(chloroplast);GO:0009570(chloroplast stroma);GO:0009651(response to salt stress);GO:0009735(response to cytokinin);GO:0010181(FMN binding);GO:0042742(defense response to bacterium);GO:0052873(FMN reductase (NADPH) activity);GO:0055114(oxidation-reductio…	04626(Plant-pathogen interaction)	K13436	EC:2.7.11.1	PREDICTED: NADPH:quinone oxidoreductase [Malus domestica]	3.10291	10.8896	3.50949	1.81126	0.00418632	0.0608968
D8674_029582	gnl|WGS:SMOL|Pdr6g013900.1	GO:0005634(nucleus);GO:0009901(anther dehiscence);GO:0010584(pollen exine formation);GO:0016787(hydrolase activity)	00230(Purine metabolism);00240(Pyrimidine metabolism)	K01510	EC:3.6.1.5	hypothetical protein DVH24_008706 [Malus domestica]	1.41576	5.02784	3.55135	1.82837	0.00421107	0.0612097
D8674_031819	gnl|WGS:SMOL|Pdr7g017430.1	GO:0005215(transporter activity);GO:0005886(plasma membrane);GO:0006857(oligopeptide transport);GO:0009624(response to nematode);GO:0016020(membrane);GO:0016021(integral component of membrane);GO:0022857(transmembrane transporter activity);GO:0055085(transmembrane transport)	NA	NA	NA	PREDICTED: LOW QUALITY PROTEIN: protein NRT1/ PTR FAMILY 5.1 [Pyrus x bretschneideri]	2.82985	9.89097	3.49523	1.80539	0.00421545	0.061226
D8674_036383	gnl|WGS:SMOL|Pdr9g018420.1	GO:0004798(thymidylate kinase activity);GO:0005634(nucleus);GO:0005739(mitochondrion);GO:0005829(cytosol);GO:0006227(dUDP biosynthetic process);GO:0006233(dTDP biosynthetic process);GO:0006235(dTTP biosynthetic process);GO:0009041(uridylate kinase activity)	00240(Pyrimidine metabolism)	K00943	EC:2.7.4.9	PREDICTED: thymidylate kinase-like isoform X1 [Pyrus x bretschneideri]	2.95937	10.4612	3.53496	1.82169	0.00424195	0.0613749
D8674_002078	gnl|WGS:SMOL|Pdr10g002320.1	GO:0003824(catalytic activity);GO:0005634(nucleus);GO:0009408(response to heat);GO:0010286(heat acclimation);GO:0010608(posttranscriptional regulation of gene expression)	NA	NA	NA	protein HEAT-STRESS-ASSOCIATED 32 [Prunus persica]	14.2851	49.2318	3.44638	1.78508	0.0042551	0.0614709
D8674_035798	gnl|WGS:SMOL|Pdr9g012570.1	GO:0000155(phosphorelay sensor kinase activity);GO:0000160(phosphorelay signal transduction system);GO:0004673(protein histidine kinase activity);GO:0004721(phosphoprotein phosphatase activity);GO:0005034(osmosensor activity);GO:0005515(protein binding);GO:0005789(endoplasmic reticulum membrane);GO:0005886(plasma membrane);GO:0006970(response to osmotic stress);GO:0009414(response to water depriv…	04075(Plant hormone signal transduction)	K14489	EC:2.7.13.3	hypothetical protein DVH24_032453 [Malus domestica]	2.34214	8.08949	3.45389	1.78822	0.00425963	0.0614893
D8674_033468	gnl|WGS:SMOL|Pdr8g010140.1	GO:0003674(molecular_function);GO:0005634(nucleus);GO:0008150(biological_process)	NA	NA	NA	PREDICTED: uncharacterized protein LOC103928190 [Pyrus x bretschneideri]	6.91385	23.8101	3.44383	1.78401	0.00432742	0.0623247
D8674_014614	gnl|WGS:SMOL|Pdr15g019060.1	GO:0003674(molecular_function);GO:0005739(mitochondrion);GO:0005778(peroxisomal membrane);GO:0008150(biological_process);GO:0016021(integral component of membrane)	04146(Peroxisome)	K13348	NA	PREDICTED: PXMP2/4 family protein 2 [Pyrus x bretschneideri]	4.6981	16.5683	3.5266	1.81828	0.00434301	0.0624539
D8674_027576	gnl|WGS:SMOL|Pdr5g020520.1	GO:0005634(nucleus);GO:0005737(cytoplasm)	NA	NA	NA	hypothetical protein DVH24_011064 [Malus domestica]	0.794682	2.83984	3.57356	1.83736	0.00451533	0.0643435
D8674_000848	gnl|WGS:SMOL|Pdr1g008480.1	GO:0003677(DNA binding);GO:0003700(DNA binding transcription factor activity);GO:0005634(nucleus);GO:0006351(transcription, DNA-templated);GO:0006355(regulation of transcription, DNA-templated);GO:0007623(circadian rhythm);GO:0009409(response to cold);GO:0009651(response to salt stress);GO:0009723(response to ethylene);GO:0009733(response to auxin);GO:0009737(response to abscisic acid);GO:0009739…	04712(Circadian rhythm - plant)	K12133	NA	PREDICTED: protein LHY-like isoform X2 [Pyrus x bretschneideri]	3.30968	11.3474	3.42853	1.77759	0.00453791	0.0645678
D8674_036628	gnl|WGS:SMOL|Pdr0g001430.1	GO:0005634(nucleus);GO:0005834(heterotrimeric G-protein complex);GO:0005886(plasma membrane);GO:0007186(G-protein coupled receptor signaling pathway);GO:0009737(response to abscisic acid)	NA	NA	NA	PREDICTED: guanine nucleotide-binding protein subunit gamma 3 [Pyrus x bretschneideri]	1.00819	3.60916	3.57984	1.8399	0.00454589	0.0646252
D8674_002930	gnl|WGS:SMOL|Pdr10g010840.1	NA	04145(Phagosome)	K07374	NA	PREDICTED: uncharacterized protein LOC103938520 [Pyrus x bretschneideri]	181.289	614.943	3.39205	1.76216	0.00460141	0.0649118
D8674_020165	gnl|WGS:SMOL|Pdr2g001230.1	GO:0005515(protein binding);GO:0005886(plasma membrane);GO:0009416(response to light stimulus);GO:0016567(protein ubiquitination);GO:0042742(defense response to bacterium)	03050(Proteasome)	K03063	NA	PREDICTED: BTB/POZ domain-containing protein At5g67385 [Pyrus x bretschneideri]	3.98725	13.5841	3.40689	1.76846	0.00465593	0.0653111
D8674_018272	gnl|WGS:SMOL|Pdr17g002020.1	GO:0004089(carbonate dehydratase activity);GO:0005886(plasma membrane);GO:0008270(zinc ion binding);GO:0009409(response to cold);GO:0009507(chloroplast);GO:0009535(chloroplast thylakoid membrane);GO:0009570(chloroplast stroma);GO:0009579(thylakoid);GO:0009817(defense response to fungus, incompatible interaction);GO:0009941(chloroplast envelope);GO:0010037(response to carbon dioxide);GO:0010119(re…	00910(Nitrogen metabolism)	K01673	EC:4.2.1.1	PREDICTED: carbonic anhydrase 2-like [Pyrus x bretschneideri]	1.26764	4.50983	3.55765	1.83093	0.00468503	0.065573
D8674_022226	gnl|WGS:SMOL|Pdr3g010260.1	NA	NA	NA	NA	-	5.7457	19.8686	3.458	1.78994	0.00471829	0.0658431
D8674_031108	gnl|WGS:SMOL|Pdr7g010320.1	GO:0005737(cytoplasm);GO:0005783(endoplasmic reticulum);GO:0005789(endoplasmic reticulum membrane);GO:0006629(lipid metabolic process);GO:0016021(integral component of membrane);GO:0016491(oxidoreductase activity);GO:0030148(sphingolipid biosynthetic process);GO:0046872(metal ion binding);GO:0052631(sphingolipid delta-8 desaturase activity);GO:0055114(oxidation-reduction process);GO:0070417(cellu…	NA	NA	NA	PREDICTED: delta(8)-fatty-acid desaturase 1-like [Pyrus x bretschneideri]	3.68913	12.5598	3.40453	1.76746	0.00473895	0.0660679
D8674_012316	gnl|WGS:SMOL|Pdr14g015530.1	NA	NA	NA	NA	PREDICTED: uncharacterized protein LOC103950034 isoform X1 [Pyrus x bretschneideri]	0.503213	1.82953	3.6357	1.86223	0.00476396	0.0663333
D8674_019049	gnl|WGS:SMOL|Pdr17g009790.1	GO:0004252(serine-type endopeptidase activity);GO:0005618(cell wall)	NA	NA	NA	PREDICTED: subtilisin-like protease SBT1.5 isoform X1 [Pyrus x bretschneideri]	1.5776	5.41799	3.43434	1.78003	0.00477379	0.0664211
D8674_015847	gnl|WGS:SMOL|Pdr16g002520.1	GO:0003674(molecular_function);GO:0005575(cellular_component)	NA	NA	NA	PREDICTED: MLP-like protein 34 isoform X2 [Pyrus x bretschneideri]	6.63607	22.9382	3.45659	1.78935	0.00479424	0.0666491
D8674_033087	gnl|WGS:SMOL|Pdr8g006330.1	GO:0005507(copper ion binding);GO:0009411(response to UV);GO:0009507(chloroplast);GO:0009534(chloroplast thylakoid);GO:0009535(chloroplast thylakoid membrane);GO:0009543(chloroplast thylakoid lumen);GO:0009570(chloroplast stroma);GO:0009579(thylakoid);GO:0017148(negative regulation of translation);GO:0031977(thylakoid lumen);GO:0046028(electron transporter, transferring electrons from cytochrome …	00195(Photosynthesis)	K02638	NA	PREDICTED: plastocyanin [Malus domestica]	4.23051	14.4433	3.41407	1.77149	0.00479724	0.0666491
D8674_021728	gnl|WGS:SMOL|Pdr3g005280.1	GO:0003677(DNA binding);GO:0003700(DNA binding transcription factor activity);GO:0005515(protein binding);GO:0005634(nucleus);GO:0005783(endoplasmic reticulum);GO:0006351(transcription, DNA-templated);GO:0006355(regulation of transcription, DNA-templated);GO:0007275(multicellular organism development);GO:0009626(plant-type hypersensitive response);GO:0009910(negative regulation of flower developm…	03013(RNA transport);03015(mRNA surveillance pathway);03018(RNA degradation)	K13126	NA	PREDICTED: NAC domain-containing protein 89-like [Malus domestica]	1.59732	5.58439	3.49611	1.80575	0.0048414	0.0671144
D8674_023816	gnl|WGS:SMOL|Pdr4g003890.1	GO:0005509(calcium ion binding);GO:0005515(protein binding);GO:0009507(chloroplast);GO:0009535(chloroplast thylakoid membrane);GO:0009543(chloroplast thylakoid lumen);GO:0009570(chloroplast stroma);GO:0009579(thylakoid);GO:0009654(photosystem II oxygen evolving complex);GO:0016020(membrane);GO:0019898(extrinsic component of membrane);GO:0030095(chloroplast photosystem II);GO:0031977(thylakoid lum…	NA	NA	NA	PREDICTED: psbP domain-containing protein 1, chloroplastic-like isoform X3 [Pyrus x bretschneideri]	4.12799	14.1722	3.4332	1.77955	0.00485329	0.0672299
D8674_010603	gnl|WGS:SMOL|Pdr13g012830.1	NA	NA	NA	NA	PREDICTED: uncharacterized protein DDB_G0282077-like [Malus domestica]	1.5924	5.66322	3.55641	1.83042	0.00486499	0.0673425
D8674_010135	gnl|WGS:SMOL|Pdr13g008150.1	GO:0046577(long-chain-alcohol oxidase activity)	NA	NA	NA	PREDICTED: long-chain-alcohol oxidase FAO1 [Pyrus x bretschneideri]	3.40232	11.5316	3.38932	1.761	0.00487949	0.0674442
D8674_034984	gnl|WGS:SMOL|Pdr9g004430.1	NA	NA	NA	NA	hypothetical protein DVH24_031120 [Malus domestica]	26.6552	89.5034	3.35783	1.74753	0.00498601	0.0686149
D8674_002984	gnl|WGS:SMOL|Pdr10g011380.1	GO:0005634(nucleus);GO:0005777(peroxisome);GO:0005829(cytosol);GO:0008891(glycolate oxidase activity);GO:0009506(plasmodesma);GO:0009507(chloroplast);GO:0009570(chloroplast stroma);GO:0009735(response to cytokinin);GO:0009854(oxidative photosynthetic carbon pathway);GO:0010181(FMN binding);GO:0016020(membrane);GO:0016491(oxidoreductase activity);GO:0022626(cytosolic ribosome);GO:0042742(defense r…	00630(Glyoxylate and dicarboxylate metabolism);04146(Peroxisome)	K11517	EC:1.1.3.15	PREDICTED: peroxisomal (S)-2-hydroxy-acid oxidase [Pyrus x bretschneideri]	13.7871	46.2444	3.35416	1.74595	0.00499298	0.0686608
D8674_001755	gnl|WGS:SMOL|Pdr1g017550.1	GO:0051213(dioxygenase activity)	00941(Flavonoid biosynthesis)	K00475	EC:1.14.11.9	PREDICTED: protein DOWNY MILDEW RESISTANCE 6-like [Pyrus x bretschneideri]	2.34807	8.04027	3.42421	1.77577	0.00499734	0.0686707
D8674_033226	gnl|WGS:SMOL|Pdr8g007720.1	GO:0003674(molecular_function);GO:0005886(plasma membrane);GO:0009555(pollen development);GO:0009793(embryo development ending in seed dormancy)	03040(Spliceosome);03013(RNA transport);03015(mRNA surveillance pathway)	K13025	EC:3.6.4.13	hypothetical protein DVH24_033243 [Malus domestica]	3.48118	12.0168	3.45194	1.78741	0.00504424	0.069164
D8674_036047	gnl|WGS:SMOL|Pdr9g015060.1	NA	NA	NA	NA	hypothetical protein DVH24_032117 [Malus domestica]	3.47622	11.9676	3.44272	1.78355	0.00517705	0.0702417
D8674_042080	gnl|WGS:SMOL|Pdr0g055950.1	GO:0016020(membrane);GO:0016709(oxidoreductase activity, acting on paired donors, with incorporation or reduction of molecular oxygen, NAD(P)H as one donor, and incorporation of one atom of oxygen);GO:0044550(secondary metabolite biosynthetic process)	NA	NA	NA	PREDICTED: geraniol 8-hydroxylase-like [Malus domestica]	10.894	36.3305	3.33491	1.73765	0.00517868	0.0702417
D8674_021448	gnl|WGS:SMOL|Pdr3g002480.1	GO:0003677(DNA binding);GO:0003700(DNA binding transcription factor activity);GO:0005634(nucleus);GO:0006351(transcription, DNA-templated);GO:0006355(regulation of transcription, DNA-templated);GO:0009908(flower development);GO:0010073(meristem maintenance);GO:0010093(specification of floral organ identity);GO:0019953(sexual reproduction);GO:0030154(cell differentiation);GO:0048316(seed developme…	NA	NA	NA	PREDICTED: ethylene-responsive transcription factor RAP2-7-like isoform X1 [Pyrus x bretschneideri]	0.570966	2.06038	3.60858	1.85143	0.00519198	0.0702705
D8674_030605	gnl|WGS:SMOL|Pdr7g005290.1	GO:0003735(structural constituent of ribosome);GO:0022625(cytosolic large ribosomal subunit);GO:0070180(large ribosomal subunit rRNA binding)	03010(Ribosome)	K02894	NA	PREDICTED: 60S ribosomal protein L23 [Fragaria vesca subsp. vesca]	3.80006	13.4968	3.55175	1.82853	0.00534639	0.0717428
D8674_016609	gnl|WGS:SMOL|Pdr16g010140.1	NA	NA	NA	NA	PREDICTED: uncharacterized protein LOC103961456 [Pyrus x bretschneideri]	0.707195	2.53584	3.58577	1.84228	0.0053699	0.0718672
D8674_033593	gnl|WGS:SMOL|Pdr8g011390.1	GO:0000977(RNA polymerase II regulatory region sequence-specific DNA binding);GO:0003700(DNA binding transcription factor activity);GO:0005515(protein binding);GO:0005634(nucleus);GO:0005737(cytoplasm);GO:0006351(transcription, DNA-templated);GO:0009739(response to gibberellin);GO:0010076(maintenance of floral meristem identity);GO:0010077(maintenance of inflorescence meristem identity);GO:001022…	NA	NA	NA	dormancy-associated MADS-box transcript factor, partial [Pyrus pyrifolia]	18.8897	62.7893	3.324	1.73292	0.00538445	0.0719975
D8674_008211	gnl|WGS:SMOL|Pdr12g009190.1	GO:0000786(nucleosome);GO:0003677(DNA binding);GO:0005634(nucleus);GO:0006334(nucleosome assembly);GO:0006352(DNA-templated transcription, initiation);GO:0042393(histone binding);GO:0046982(protein heterodimerization activity)	NA	NA	NA	PREDICTED: histone H4 [Malus domestica]	125.321	414.562	3.30799	1.72595	0.00540491	0.0722199
D8674_001386	gnl|WGS:SMOL|Pdr1g013860.1	GO:0003677(DNA binding);GO:0003700(DNA binding transcription factor activity);GO:0005634(nucleus);GO:0006351(transcription, DNA-templated);GO:0006355(regulation of transcription, DNA-templated);GO:0009873(ethylene-activated signaling pathway);GO:0010200(response to chitin)	NA	NA	NA	PREDICTED: ethylene-responsive transcription factor ERF105-like [Pyrus x bretschneideri]	110.016	363.044	3.29994	1.72244	0.00544128	0.072603
D8674_011798	gnl|WGS:SMOL|Pdr14g010350.1	GO:0005515(protein binding);GO:0005773(vacuole);GO:0005886(plasma membrane);GO:0005887(integral component of plasma membrane);GO:0006810(transport);GO:0006833(water transport);GO:0009414(response to water deprivation);GO:0009507(chloroplast);GO:0015250(water channel activity);GO:0015267(channel activity);GO:0016020(membrane);GO:0016021(integral component of membrane);GO:0034220(ion transmembrane …	NA	NA	NA	aquaporin PIP1-3 [Malus domestica]	2.33719	7.91427	3.38624	1.75968	0.00544896	0.0726488
D8674_026692	gnl|WGS:SMOL|Pdr5g011680.1	GO:0005509(calcium ion binding);GO:0005634(nucleus)	NA	NA	NA	PREDICTED: uncharacterized protein LOC103948869 [Pyrus x bretschneideri]	3.66679	12.2165	3.33167	1.73624	0.00545242	0.0726488
D8674_015035	gnl|WGS:SMOL|Pdr15g023270.1	GO:0004553(hydrolase activity, hydrolyzing O-glycosyl compounds);GO:0030247(polysaccharide binding);GO:0046658(anchored component of plasma membrane)	00500(Starch and sucrose metabolism)	K19893	EC:3.2.1.39	PREDICTED: glucan endo-1,3-beta-glucosidase 5-like [Pyrus x bretschneideri]	0.455439	1.62558	3.56926	1.83562	0.00547083	0.0726516
D8674_011419	gnl|WGS:SMOL|Pdr14g006560.1	GO:0005515(protein binding);GO:0005524(ATP binding);GO:0005739(mitochondrion);GO:0009507(chloroplast);GO:0009570(chloroplast stroma);GO:0009706(chloroplast inner membrane);GO:0010007(magnesium chelatase complex);GO:0015979(photosynthesis);GO:0015995(chlorophyll biosynthetic process);GO:0016851(magnesium chelatase activity)	00860(Porphyrin and chlorophyll metabolism)	K03403	EC:6.6.1.1	hypothetical protein DVH24_019591 [Malus domestica]	2.11938	7.0468	3.32494	1.73333	0.00547432	0.0726516
D8674_012512	gnl|WGS:SMOL|Pdr14g017490.1	NA	NA	NA	NA	hypothetical protein DVH24_008729 [Malus domestica]	4.87833	16.9849	3.4817	1.79979	0.00547958	0.0726516
D8674_004292	gnl|WGS:SMOL|Pdr10g024460.1	GO:0005887(integral component of plasma membrane);GO:0009705(plant-type vacuole membrane);GO:0009992(cellular water homeostasis);GO:0015250(water channel activity);GO:0015254(glycerol channel activity);GO:0034220(ion transmembrane transport);GO:0042807(central vacuole)	04075(Plant hormone signal transduction)	K14488	NA	PREDICTED: auxin-induced protein 15A-like [Pyrus x bretschneideri]	3.80675	12.988	3.41182	1.77054	0.00550064	0.0728642
D8674_015148	gnl|WGS:SMOL|Pdr15g024400.1	GO:0003885(D-arabinono-1,4-lactone oxidase activity);GO:0005739(mitochondrion);GO:0005773(vacuole);GO:0016020(membrane);GO:0019853(L-ascorbic acid biosynthetic process);GO:0050105(L-gulonolactone oxidase activity);GO:0050660(flavin adenine dinucleotide binding);GO:0055114(oxidation-reduction process)	00053(Ascorbate and aldarate metabolism)	K00103	EC:1.1.3.8	PREDICTED: L-gulonolactone oxidase 3 [Pyrus x bretschneideri]	1.27316	4.33712	3.40658	1.76832	0.00550972	0.0728975
D8674_032968	gnl|WGS:SMOL|Pdr8g005140.1	GO:0004565(beta-galactosidase activity);GO:0005618(cell wall);GO:0005773(vacuole)	00052(Galactose metabolism);00600(Sphingolipid metabolism);00531(Glycosaminoglycan degradation);00604(Glycosphingolipid biosynthesis - ganglio series);00511(Other glycan degradation)	K12309	EC:3.2.1.23	beta-D-galactosidase 7 [Pyrus x bretschneideri]	0.501878	1.73145	3.44995	1.78657	0.00559193	0.0738783
D8674_018661	gnl|WGS:SMOL|Pdr17g005910.1	GO:0006855(drug transmembrane transport)	NA	NA	NA	PREDICTED: protein DETOXIFICATION 40-like [Malus domestica]	1.41432	4.76708	3.37058	1.753	0.0056378	0.0742645
D8674_024177	gnl|WGS:SMOL|Pdr4g007500.1	GO:0003674(molecular_function);GO:0008150(biological_process);GO:0009507(chloroplast);GO:0009535(chloroplast thylakoid membrane)	NA	NA	NA	PREDICTED: uncharacterized protein LOC103959582 [Pyrus x bretschneideri]	3.87359	12.9695	3.3482	1.74338	0.005651	0.0742645
D8674_040934	gnl|WGS:SMOL|Pdr0g044490.1	GO:0000245(spliceosomal complex assembly);GO:0003729(mRNA binding);GO:0005686(U2 snRNP);GO:0005689(U12-type spliceosomal complex);GO:0071004(U2-type prespliceosome);GO:0071013(catalytic step 2 spliceosome)	03040(Spliceosome)	K12828	NA	hypothetical protein DVH24_027641 [Malus domestica]	4.59327	15.1119	3.29	1.71809	0.00565422	0.0742645
D8674_041437	gnl|WGS:SMOL|Pdr0g049520.1	GO:0003674(molecular_function);GO:0008150(biological_process);GO:0009507(chloroplast)	NA	NA	NA	PREDICTED: uncharacterized protein LOC103949237 [Pyrus x bretschneideri]	4.95658	16.3756	3.30381	1.72413	0.00565546	0.0742645
D8674_034047	gnl|WGS:SMOL|Pdr8g015930.1	NA	NA	NA	NA	PREDICTED: uncharacterized protein LOC103441514 [Malus domestica]	10.3669	34.2893	3.30757	1.72577	0.00565634	0.0742645
D8674_024750	gnl|WGS:SMOL|Pdr4g013230.1	GO:0004069(L-aspartate:2-oxoglutarate aminotransferase activity);GO:0006520(cellular amino acid metabolic process);GO:0008483(transaminase activity);GO:0008793(aromatic-amino-acid:2-oxoglutarate aminotransferase activity);GO:0009058(biosynthetic process);GO:0009693(ethylene biosynthetic process);GO:0016847(1-aminocyclopropane-1-carboxylate synthase activity);GO:0030170(pyridoxal phosphate binding)	NA	NA	NA	PREDICTED: probable aminotransferase ACS10 [Pyrus x bretschneideri]	4.7394	15.6688	3.30607	1.72512	0.00567197	0.0743663
D8674_013793	gnl|WGS:SMOL|Pdr15g010850.1	GO:0005524(ATP binding);GO:0005634(nucleus);GO:0006952(defense response);GO:0043130(ubiquitin binding);GO:0043531(ADP binding)	04075(Plant hormone signal transduction)	K13415	EC:2.7.10.1;EC:2.7.11.1	PREDICTED: probable disease resistance protein At5g66900 isoform X1 [Pyrus x bretschneideri]	83.5264	273.622	3.27588	1.71188	0.00568193	0.0744451
D8674_041287	gnl|WGS:SMOL|Pdr0g048020.1	NA	NA	NA	NA	PREDICTED: uncharacterized protein LOC103931175 [Pyrus x bretschneideri]	7.35307	24.3388	3.31002	1.72684	0.00570271	0.0746656
D8674_006131	gnl|WGS:SMOL|Pdr11g013920.1	NA	NA	NA	NA	PREDICTED: putative F-box protein At3g16210 [Pyrus x bretschneideri]	225.25	737.665	3.27487	1.71144	0.00571461	0.0747695
D8674_038393	gnl|WGS:SMOL|Pdr0g019080.1	GO:0005634(nucleus);GO:0006281(DNA repair);GO:0016301(kinase activity)	04136(Autophagy - other eukaryotes)	K07203	EC:2.7.11.1	PREDICTED: serine/threonine-protein kinase TOR isoform X2 [Pyrus x bretschneideri]	19.9512	65.306	3.27328	1.71074	0.00573271	0.0749024
D8674_010667	gnl|WGS:SMOL|Pdr13g013470.1	GO:0004672(protein kinase activity);GO:0004675(transmembrane receptor protein serine/threonine kinase activity);GO:0005524(ATP binding);GO:0005576(extracellular region);GO:0005794(Golgi apparatus);GO:0005829(cytosol);GO:0005886(plasma membrane);GO:0006468(protein phosphorylation);GO:0007166(cell surface receptor signaling pathway);GO:0009506(plasmodesma);GO:0016021(integral component of membrane)	NA	NA	NA	PREDICTED: receptor-like kinase TMK4 [Pyrus x bretschneideri]	0.911946	3.0646	3.36051	1.74868	0.00574572	0.0749685
D8674_033692	gnl|WGS:SMOL|Pdr8g012380.1	GO:0043161(proteasome-mediated ubiquitin-dependent protein catabolic process);GO:0061630(ubiquitin protein ligase activity)	NA	NA	NA	PREDICTED: RING-H2 finger protein ATL54-like [Pyrus x bretschneideri]	1.22439	4.23785	3.4612	1.79127	0.0057776	0.0753324
D8674_032396	gnl|WGS:SMOL|Pdr7g023200.1	GO:0008728(GTP diphosphokinase activity);GO:0008893(guanosine-3',5'-bis(diphosphate) 3'-diphosphatase activity);GO:0009507(chloroplast);GO:0015969(guanosine tetraphosphate metabolic process);GO:0042594(response to starvation)	03013(RNA transport)	K03262	NA	PREDICTED: uncharacterized protein LOC103951517 [Pyrus x bretschneideri]	4.37307	14.3607	3.2839	1.71541	0.00588528	0.0764587
D8674_012704	gnl|WGS:SMOL|Pdr14g019410.1	GO:0003676(nucleic acid binding);GO:0003700(DNA binding transcription factor activity);GO:0005634(nucleus);GO:0006355(regulation of transcription, DNA-templated);GO:0008270(zinc ion binding);GO:0009590(detection of gravity);GO:0009630(gravitropism);GO:0009958(positive gravitropism);GO:0009959(negative gravitropism);GO:0009965(leaf morphogenesis);GO:0010031(circumnutation);GO:0010601(positive regu…	00052(Galactose metabolism);00600(Sphingolipid metabolism);00531(Glycosaminoglycan degradation);00604(Glycosphingolipid biosynthesis - ganglio series);00511(Other glycan degradation)	K12309	EC:3.2.1.23	PREDICTED: protein indeterminate-domain 14-like [Pyrus x bretschneideri]	9.0742	29.6063	3.26269	1.70606	0.00592932	0.0769385
D8674_012482	gnl|WGS:SMOL|Pdr14g017190.1	GO:0003674(molecular_function);GO:0005576(extracellular region);GO:0008150(biological_process)	NA	NA	NA	PREDICTED: uncharacterized protein LOC103952986 [Pyrus x bretschneideri]	0.896266	3.0482	3.401	1.76596	0.00594524	0.077092
D8674_040880	gnl|WGS:SMOL|Pdr0g043950.1	GO:0003674(molecular_function);GO:0005737(cytoplasm);GO:0008150(biological_process)	NA	NA	NA	PREDICTED: LOW QUALITY PROTEIN: ganglioside-induced differentiation-associated-protein 2 [Pyrus x bretschneideri]	8.21619	27.154	3.30494	1.72462	0.005965	0.0772456
D8674_009206	gnl|WGS:SMOL|Pdr12g019140.1	GO:0009061(anaerobic respiration);GO:0018171(peptidyl-cysteine oxidation);GO:0070483(detection of hypoxia)	00430(Taurine and hypotaurine metabolism)	K10712	EC:1.13.11.19	PREDICTED: plant cysteine oxidase 2-like [Pyrus x bretschneideri]	56.255	182.911	3.25146	1.70109	0.00597362	0.0772595
D8674_030169	gnl|WGS:SMOL|Pdr7g000930.1	GO:0000333(telomerase catalytic core complex);GO:0003721(telomerase RNA reverse transcriptase activity);GO:0007004(telomere maintenance via telomerase);GO:0042162(telomeric DNA binding);GO:0070034(telomerase RNA binding)	NA	NA	NA	PREDICTED: telomerase reverse transcriptase [Pyrus x bretschneideri]	0.24158	0.8507	3.5214	1.81615	0.00604584	0.0778082
D8674_041743	gnl|WGS:SMOL|Pdr0g052580.1	GO:0009543(chloroplast thylakoid lumen);GO:0010206(photosystem II repair);GO:0010207(photosystem II assembly)	00195(Photosynthesis)	K08902	NA	PREDICTED: photosystem II repair protein PSB27-H1, chloroplastic [Pyrus x bretschneideri]	3.75571	12.4676	3.31965	1.73103	0.00619933	0.0791894
D8674_033982	gnl|WGS:SMOL|Pdr8g015280.1	GO:0003700(DNA binding transcription factor activity);GO:0003729(mRNA binding);GO:0005737(cytoplasm);GO:0005856(cytoskeleton);GO:0005886(plasma membrane);GO:0046872(metal ion binding);GO:0051015(actin filament binding);GO:0051017(actin filament bundle assembly)	NA	NA	NA	PREDICTED: LIM domain-containing protein WLIM1-like [Pyrus x bretschneideri]	16.9137	54.8702	3.24412	1.69783	0.00621023	0.079275
D8674_026038	gnl|WGS:SMOL|Pdr5g005140.1	GO:0003865(3-oxo-5-alpha-steroid 4-dehydrogenase activity);GO:0005737(cytoplasm);GO:0005783(endoplasmic reticulum);GO:0005789(endoplasmic reticulum membrane);GO:0005794(Golgi apparatus);GO:0006487(protein N-linked glycosylation);GO:0006629(lipid metabolic process);GO:0016021(integral component of membrane);GO:0016627(oxidoreductase activity, acting on the CH-CH group of donors);GO:0055114(oxidati…	NA	NA	NA	PREDICTED: polyprenol reductase 2-like isoform X1 [Pyrus x bretschneideri]	22.3991	72.3264	3.22898	1.69108	0.0062534	0.0795688
D8674_034156	gnl|WGS:SMOL|Pdr8g017020.1	GO:0051213(dioxygenase activity)	NA	NA	NA	hypothetical protein DVH24_021055 [Malus domestica]	9.55565	31.1464	3.25947	1.70464	0.00625541	0.0795688
D8674_039010	gnl|WGS:SMOL|Pdr0g025250.1	NA	NA	NA	NA	hypothetical protein DVH24_038127 [Malus domestica]	3.83345	13.3617	3.48555	1.80139	0.00625855	0.0795688
D8674_036134	gnl|WGS:SMOL|Pdr9g015930.1	GO:0005886(plasma membrane);GO:0006811(ion transport);GO:0009507(chloroplast);GO:0016021(integral component of membrane)	NA	NA	NA	PREDICTED: CSC1-like protein HYP1 [Pyrus x bretschneideri]	1.03615	3.43234	3.31258	1.72796	0.00628449	0.0797911
D8674_031674	gnl|WGS:SMOL|Pdr7g015980.1	GO:0005515(protein binding);GO:0005634(nucleus);GO:0006351(transcription, DNA-templated);GO:0006355(regulation of transcription, DNA-templated)	NA	NA	NA	PREDICTED: L10-interacting MYB domain-containing protein-like [Pyrus x bretschneideri]	1.48918	4.99268	3.35262	1.74529	0.00632805	0.080021
D8674_031459	gnl|WGS:SMOL|Pdr7g013830.1	GO:0000290(deadenylation-dependent decapping of nuclear-transcribed mRNA);GO:0005737(cytoplasm);GO:0050072(m7G(5')pppN diphosphatase activity)	03018(RNA degradation)	K12613	EC:3.6.1.62	PREDICTED: mRNA-decapping enzyme subunit 2-like [Pyrus x bretschneideri]	27.0442	87.1133	3.22115	1.68758	0.0063481	0.0802177
D8674_005940	gnl|WGS:SMOL|Pdr11g012010.1	GO:0001678(cellular glucose homeostasis);GO:0004340(glucokinase activity);GO:0005829(cytosol);GO:0006096(glycolytic process);GO:0008865(fructokinase activity);GO:0019158(mannokinase activity)	00010(Glycolysis / Gluconeogenesis);00051(Fructose and mannose metabolism);00052(Galactose metabolism);00500(Starch and sucrose metabolism);00520(Amino sugar and nucleotide sugar metabolism);00524(Neomycin, kanamycin and gentamicin biosynthesis)	K00844	EC:2.7.1.1	PREDICTED: hexokinase-3 [Pyrus x bretschneideri]	7.51416	24.3281	3.23764	1.69494	0.00636061	0.0802177
D8674_024865	gnl|WGS:SMOL|Pdr4g014380.1	GO:0003978(UDP-glucose 4-epimerase activity);GO:0005794(Golgi apparatus);GO:0005829(cytosol);GO:0005886(plasma membrane);GO:0006012(galactose metabolic process);GO:0033358(UDP-L-arabinose biosynthetic process);GO:0045227(capsule polysaccharide biosynthetic process);GO:0046369(galactose biosynthetic process);GO:0046983(protein dimerization activity);GO:0050373(UDP-arabinose 4-epimerase activity);G…	00052(Galactose metabolism);00520(Amino sugar and nucleotide sugar metabolism)	K01784	EC:5.1.3.2	PREDICTED: bifunctional UDP-glucose 4-epimerase and UDP-xylose 4-epimerase 1 [Pyrus x bretschneideri]	128.516	413.181	3.21502	1.68483	0.00637318	0.0803224
D8674_008630	gnl|WGS:SMOL|Pdr12g013380.1	GO:0003674(molecular_function);GO:0008150(biological_process);GO:0009507(chloroplast)	00650(Butanoate metabolism);00072(Synthesis and degradation of ketone bodies);00280(Valine, leucine and isoleucine degradation);04146(Peroxisome)	K01640	EC:4.1.3.4	PREDICTED: F-box protein At2g26850-like [Malus domestica]	0.830331	2.7593	3.32313	1.73254	0.00638821	0.080351
D8674_031929	gnl|WGS:SMOL|Pdr7g018530.1	GO:0003674(molecular_function);GO:0005739(mitochondrion);GO:0008150(biological_process);GO:0016021(integral component of membrane)	NA	NA	NA	hypothetical protein PRUPE_2G267700 [Prunus persica]	3.20564	10.664	3.32663	1.73406	0.00640143	0.0804635
D8674_004260	gnl|WGS:SMOL|Pdr10g024140.1	GO:0003677(DNA binding);GO:0005634(nucleus);GO:0006368(transcription elongation from RNA polymerase II promoter);GO:0009908(flower development);GO:0009910(negative regulation of flower development);GO:0016570(histone modification);GO:0016593(Cdc73/Paf1 complex);GO:0045893(positive regulation of transcription, DNA-templated);GO:1990269(RNA polymerase II C-terminal domain phosphoserine binding)	NA	NA	NA	PREDICTED: protein RTF1 homolog [Pyrus x bretschneideri]	49.8956	160.309	3.21289	1.68387	0.00641152	0.0805368
D8674_028008	gnl|WGS:SMOL|Pdr5g024840.1	GO:0003674(molecular_function);GO:0005886(plasma membrane);GO:0008150(biological_process);GO:0016021(integral component of membrane)	NA	NA	NA	PREDICTED: protein PLANT CADMIUM RESISTANCE 12 [Pyrus x bretschneideri]	8.15551	26.3646	3.23273	1.69275	0.00641603	0.0805398
D8674_015388	gnl|WGS:SMOL|Pdr15g026800.1	GO:0004607(phosphatidylcholine-sterol O-acyltransferase activity);GO:0005576(extracellular region);GO:0005773(vacuole);GO:0005774(vacuolar membrane);GO:0006629(lipid metabolic process);GO:0008374(O-acyltransferase activity);GO:0016021(integral component of membrane)	00564(Glycerophospholipid metabolism)	K06129	EC:3.1.1.5	hypothetical protein DVH24_012576 [Malus domestica]	78.9989	253.714	3.21162	1.6833	0.00643397	0.0806722
D8674_025197	gnl|WGS:SMOL|Pdr4g017700.1	GO:0003924(GTPase activity);GO:0005525(GTP binding);GO:0005794(Golgi apparatus);GO:0005829(cytosol);GO:0005886(plasma membrane);GO:0015031(protein transport);GO:0042470(melanosome)	04144(Endocytosis)	K07904	NA	PREDICTED: ras-related protein RABA5e [Malus domestica]	12.8264	41.3316	3.22238	1.68813	0.00643514	0.0806722
D8674_029698	gnl|WGS:SMOL|Pdr6g015060.1	GO:0005524(ATP binding);GO:0005739(mitochondrion);GO:0005783(endoplasmic reticulum);GO:0005886(plasma membrane);GO:0009409(response to cold);GO:0009414(response to water deprivation);GO:0009651(response to salt stress);GO:0009737(response to abscisic acid);GO:0010154(fruit development);GO:0010431(seed maturation);GO:0016021(integral component of membrane);GO:0016887(ATPase activity);GO:0031966(mi…	NA	NA	NA	PREDICTED: AAA-ATPase ASD, mitochondrial-like [Pyrus x bretschneideri]	7.34972	23.7331	3.22911	1.69114	0.00649787	0.0812967
D8674_012514	gnl|WGS:SMOL|Pdr14g017510.1	GO:0003674(molecular_function);GO:0005634(nucleus);GO:0008150(biological_process)	NA	NA	NA	PREDICTED: uncharacterized protein LOC103455218 [Malus domestica]	1.08054	3.64422	3.37258	1.75385	0.00651753	0.0814886
D8674_021554	gnl|WGS:SMOL|Pdr3g003540.1	GO:0003735(structural constituent of ribosome);GO:0006412(translation);GO:0022627(cytosolic small ribosomal subunit)	03010(Ribosome)	K02961	NA	PREDICTED: uncharacterized protein LOC103954207 [Pyrus x bretschneideri]	10.3512	33.4265	3.22925	1.6912	0.0065352	0.0816554
D8674_013221	gnl|WGS:SMOL|Pdr15g005130.1	GO:0004222(metalloendopeptidase activity);GO:0005524(ATP binding);GO:0006508(proteolysis);GO:0009507(chloroplast);GO:0009534(chloroplast thylakoid);GO:0016021(integral component of membrane)	NA	NA	NA	PREDICTED: uncharacterized protein LOC103935053 [Pyrus x bretschneideri]	1.59993	5.30196	3.31387	1.72852	0.00654572	0.0817171
D8674_030630	gnl|WGS:SMOL|Pdr7g005540.1	NA	NA	NA	NA	hypothetical protein CRG98_000864 [Punica granatum]	1.51792	5.25452	3.46166	1.79146	0.00655957	0.0817894
D8674_029725	gnl|WGS:SMOL|Pdr6g015330.1	GO:0003674(molecular_function);GO:0009507(chloroplast);GO:0009515(granal stacked thylakoid);GO:0009534(chloroplast thylakoid);GO:0009535(chloroplast thylakoid membrane);GO:0010027(thylakoid membrane organization);GO:0010196(nonphotochemical quenching);GO:0090391(granum assembly)	NA	NA	NA	PREDICTED: uncharacterized protein LOC103958759 [Pyrus x bretschneideri]	4.78673	15.6151	3.26216	1.70583	0.00656327	0.0817894
D8674_002471	gnl|WGS:SMOL|Pdr10g006250.1	GO:0005634(nucleus);GO:0005777(peroxisome);GO:0005829(cytosol);GO:0008891(glycolate oxidase activity);GO:0009506(plasmodesma);GO:0009507(chloroplast);GO:0009570(chloroplast stroma);GO:0009735(response to cytokinin);GO:0009854(oxidative photosynthetic carbon pathway);GO:0010181(FMN binding);GO:0016020(membrane);GO:0016491(oxidoreductase activity);GO:0022626(cytosolic ribosome);GO:0042742(defense r…	00630(Glyoxylate and dicarboxylate metabolism);04146(Peroxisome)	K11517	EC:1.1.3.15	PREDICTED: peroxisomal (S)-2-hydroxy-acid oxidase GLO1 isoform X1 [Pyrus x bretschneideri]	7.40404	23.8372	3.21948	1.68683	0.00660419	0.0821908
D8674_031420	gnl|WGS:SMOL|Pdr7g013440.1	GO:0005737(cytoplasm);GO:0006508(proteolysis);GO:0008234(cysteine-type peptidase activity)	NA	NA	NA	hypothetical protein DVH24_023923 [Malus domestica]	1.59564	5.24915	3.28968	1.71795	0.00662779	0.0824302
D8674_016885	gnl|WGS:SMOL|Pdr16g012900.1	GO:0000977(RNA polymerase II regulatory region sequence-specific DNA binding);GO:0001085(RNA polymerase II transcription factor binding);GO:0001228(transcriptional activator activity, RNA polymerase II transcription regulatory region sequence-specific DNA binding);GO:0003682(chromatin binding);GO:0005634(nucleus);GO:0005667(transcription factor complex);GO:0030154(cell differentiation)	NA	NA	NA	PREDICTED: GATA transcription factor 15 [Pyrus x bretschneideri]	12.2952	40.0269	3.25549	1.70287	0.00663328	0.082444
D8674_007257	gnl|WGS:SMOL|Pdr11g025180.1	GO:0005200(structural constituent of cytoskeleton);GO:0005618(cell wall);GO:0005737(cytoplasm);GO:0005829(cytosol);GO:0005886(plasma membrane);GO:0009506(plasmodesma);GO:0045298(tubulin complex);GO:0048046(apoplast);GO:0071258(cellular response to gravity)	04145(Phagosome)	K07374	NA	PREDICTED: tubulin alpha-3 chain [Malus domestica]	55.2067	176.308	3.1936	1.67518	0.0066591	0.0826017
D8674_014794	gnl|WGS:SMOL|Pdr15g020860.1	GO:0004536(deoxyribonuclease activity);GO:0005634(nucleus);GO:0016788(hydrolase activity, acting on ester bonds)	NA	NA	NA	PREDICTED: uncharacterized metal-dependent hydrolase YabD [Malus domestica]	40.8871	130.791	3.19883	1.67755	0.0067066	0.0828385
D8674_039351	gnl|WGS:SMOL|Pdr0g028660.1	GO:0003723(RNA binding);GO:0004519(endonuclease activity);GO:0005739(mitochondrion);GO:0008270(zinc ion binding);GO:0009451(RNA modification);GO:0043231(intracellular membrane-bounded organelle)	03440(Homologous recombination)	K10683	NA	PREDICTED: pentatricopeptide repeat-containing protein At4g32450, mitochondrial-like [Pyrus x bretschneideri]	1.28893	4.23454	3.28531	1.71603	0.00670892	0.0828385
D8674_024193	gnl|WGS:SMOL|Pdr4g007660.1	GO:0005737(cytoplasm)	NA	NA	NA	PREDICTED: protein SSUH2 homolog isoform X1 [Pyrus x bretschneideri]	8.91651	28.6344	3.21139	1.6832	0.00678666	0.0833134
D8674_003047	gnl|WGS:SMOL|Pdr10g012010.1	GO:0009507(chloroplast);GO:0009534(chloroplast thylakoid);GO:0009535(chloroplast thylakoid membrane);GO:0009538(photosystem I reaction center);GO:0009579(thylakoid);GO:0009735(response to cytokinin);GO:0009941(chloroplast envelope);GO:0010287(plastoglobule);GO:0015979(photosynthesis);GO:0016020(membrane)	00195(Photosynthesis)	K02693	NA	hypothetical protein DVH24_010473 [Malus domestica]	59.0227	188.059	3.18621	1.67184	0.00678713	0.0833134
D8674_041054	gnl|WGS:SMOL|Pdr0g045690.1	GO:0005215(transporter activity);GO:0005634(nucleus);GO:0005829(cytosol);GO:0005886(plasma membrane);GO:0006810(transport);GO:0007049(cell cycle);GO:0008289(lipid binding);GO:0051301(cell division)	NA	NA	NA	PREDICTED: patellin-3-like [Pyrus x bretschneideri]	94.5598	300.579	3.17872	1.66845	0.00683333	0.0837171
D8674_003051	gnl|WGS:SMOL|Pdr10g012050.1	GO:0003674(molecular_function);GO:0005634(nucleus);GO:0008150(biological_process)	NA	NA	NA	hypothetical protein DVH24_028678 [Malus domestica]	37.1063	117.954	3.17882	1.66849	0.00684798	0.0838422
D8674_023662	gnl|WGS:SMOL|Pdr4g002350.1	GO:0000350(generation of catalytic spliceosome for second transesterification step);GO:0000384(first spliceosomal transesterification activity);GO:0000389(mRNA 3'-splice site recognition);GO:0000974(Prp19 complex);GO:0071012(catalytic step 1 spliceosome);GO:0071013(catalytic step 2 spliceosome);GO:0071014(post-mRNA release spliceosomal complex);GO:0071020(post-spliceosomal complex)	03040(Spliceosome)	K12870	NA	PREDICTED: pre-mRNA-splicing factor ISY1 homolog [Pyrus x bretschneideri]	2.39333	7.78895	3.25444	1.70241	0.00686527	0.0839458
D8674_022181	gnl|WGS:SMOL|Pdr3g009810.1	GO:0005759(mitochondrial matrix);GO:0006790(sulfur compound metabolic process);GO:0008198(ferrous iron binding);GO:0016226(iron-sulfur cluster assembly);GO:0051537(2 iron, 2 sulfur cluster binding);GO:0051539(4 iron, 4 sulfur cluster binding);GO:0097428(protein maturation by iron-sulfur cluster transfer)	NA	NA	NA	hypothetical protein DVH24_019178 [Malus domestica]	5.92114	19.6493	3.31851	1.73053	0.00692564	0.0845734
D8674_033470	gnl|WGS:SMOL|Pdr8g010160.1	GO:0000287(magnesium ion binding);GO:0003824(catalytic activity);GO:0005524(ATP binding);GO:0005622(intracellular);GO:0005634(nucleus);GO:0005737(cytoplasm);GO:0009611(response to wounding);GO:0016310(phosphorylation);GO:0032957(inositol trisphosphate metabolic process);GO:0047325(inositol tetrakisphosphate 1-kinase activity);GO:0052725(inositol-1,3,4-trisphosphate 6-kinase activity);GO:0052726(i…	00562(Inositol phosphate metabolism);04070(Phosphatidylinositol signaling system)	K00913	EC:2.7.1.159;EC:2.7.1.134	PREDICTED: inositol-tetrakisphosphate 1-kinase 3-like isoform X1 [Pyrus x bretschneideri]	0.830588	2.79314	3.36285	1.74969	0.00694179	0.0847158
D8674_019235	gnl|WGS:SMOL|Pdr17g011650.3	GO:0003676(nucleic acid binding);GO:0003677(DNA binding);GO:0003700(DNA binding transcription factor activity);GO:0005634(nucleus);GO:0006351(transcription, DNA-templated);GO:0006355(regulation of transcription, DNA-templated);GO:0008270(zinc ion binding);GO:0046872(metal ion binding)	00052(Galactose metabolism);00600(Sphingolipid metabolism);00531(Glycosaminoglycan degradation);00604(Glycosphingolipid biosynthesis - ganglio series);00511(Other glycan degradation)	K12309	EC:3.2.1.23	PREDICTED: protein indeterminate-domain 7-like [Pyrus x bretschneideri]	1.20361	3.9151	3.25279	1.70168	0.00702339	0.0855458
D8674_017968	gnl|WGS:SMOL|Pdr16g023730.1	NA	NA	NA	NA	hypothetical protein DVH24_040170, partial [Malus domestica]	442.054	1398.36	3.16334	1.66145	0.00703424	0.0856226
D8674_041659	gnl|WGS:SMOL|Pdr0g051740.1	GO:0005634(nucleus)	NA	NA	NA	PREDICTED: zinc finger protein CONSTANS-LIKE 6-like [Pyrus x bretschneideri]	1.41714	4.62067	3.26056	1.70512	0.00706095	0.0858923
D8674_025880	gnl|WGS:SMOL|Pdr5g003560.1	GO:0000977(RNA polymerase II regulatory region sequence-specific DNA binding);GO:0003677(DNA binding);GO:0003700(DNA binding transcription factor activity);GO:0005515(protein binding);GO:0005634(nucleus);GO:0045944(positive regulation of transcription by RNA polymerase II);GO:0046983(protein dimerization activity)	NA	NA	NA	flowering locus C-like protein [Pyrus pyrifolia var. culta]	1.51202	4.91556	3.25098	1.70088	0.00706633	0.0859023
D8674_001307	gnl|WGS:SMOL|Pdr1g013070.1	GO:0004497(monooxygenase activity);GO:0007275(multicellular organism development);GO:0010268(brassinosteroid homeostasis);GO:0016125(sterol metabolic process);GO:0016132(brassinosteroid biosynthetic process)	00905(Brassinosteroid biosynthesis)	K09588	EC:1.14.-.-	PREDICTED: cytochrome P450 90A1-like [Pyrus x bretschneideri]	221.565	700.09	3.15975	1.65981	0.00707625	0.0859536
D8674_013510	gnl|WGS:SMOL|Pdr15g008020.1	GO:0005515(protein binding);GO:0005524(ATP binding);GO:0005739(mitochondrion);GO:0008270(zinc ion binding);GO:0008483(transaminase activity);GO:0009507(chloroplast);GO:0016226(iron-sulfur cluster assembly);GO:0030170(pyridoxal phosphate binding);GO:0031071(cysteine desulfurase activity);GO:0044571([2Fe-2S] cluster assembly);GO:0051536(iron-sulfur cluster binding)	00730(Thiamine metabolism);04122(Sulfur relay system)	K04487	EC:2.8.1.7	PREDICTED: cysteine desulfurase, mitochondrial-like [Pyrus x bretschneideri]	0.856696	2.87736	3.35867	1.74789	0.00707966	0.0859536
D8674_028107	gnl|WGS:SMOL|Pdr5g025830.1	GO:0006511(ubiquitin-dependent protein catabolic process)	NA	NA	NA	PREDICTED: uncharacterized membrane protein At1g16860-like isoform X1 [Pyrus x bretschneideri]	2.99647	9.73682	3.24943	1.70019	0.00715114	0.086581
D8674_029629	gnl|WGS:SMOL|Pdr6g014370.1	GO:0005249(voltage-gated potassium channel activity);GO:0005887(integral component of plasma membrane);GO:0042391(regulation of membrane potential)	04626(Plant-pathogen interaction)	K05391	NA	PREDICTED: probable cyclic nucleotide-gated ion channel 16 [Malus domestica]	1.05211	3.45634	3.28514	1.71596	0.00715115	0.086581
D8674_001233	gnl|WGS:SMOL|Pdr1g012330.1	GO:0009813(flavonoid biosynthetic process);GO:0043231(intracellular membrane-bounded organelle);GO:0052696(flavonoid glucuronidation);GO:0080043(quercetin 3-O-glucosyltransferase activity);GO:0080044(quercetin 7-O-glucosyltransferase activity)	00908(Zeatin biosynthesis)	K13493	EC:2.4.1.-	PREDICTED: UDP-glycosyltransferase 76F1-like [Pyrus x bretschneideri]	4.26675	13.6441	3.19778	1.67707	0.00717604	0.086733
D8674_040468	gnl|WGS:SMOL|Pdr0g039830.1	GO:0005730(nucleolus);GO:0042273(ribosomal large subunit biogenesis)	NA	NA	NA	PREDICTED: uncharacterized protein LOC103938330 [Pyrus x bretschneideri]	4.06527	13.1605	3.23729	1.69479	0.00723116	0.087176
D8674_012449	gnl|WGS:SMOL|Pdr14g016860.1	GO:0005507(copper ion binding);GO:0005777(peroxisome);GO:0008131(primary amine oxidase activity);GO:0009507(chloroplast);GO:0010311(lateral root formation);GO:0048038(quinone binding);GO:0055114(oxidation-reduction process)	00260(Glycine, serine and threonine metabolism);00350(Tyrosine metabolism);00360(Phenylalanine metabolism);00410(beta-Alanine metabolism);00950(Isoquinoline alkaloid biosynthesis);00960(Tropane, piperidine and pyridine alkaloid biosynthesis)	K00276	EC:1.4.3.21	PREDICTED: uncharacterized protein LOC103937550 [Pyrus x bretschneideri]	2.68635	8.54438	3.18067	1.66933	0.00724392	0.087274
D8674_015844	gnl|WGS:SMOL|Pdr16g002490.1	GO:0004012(phospholipid-translocating ATPase activity);GO:0005802(trans-Golgi network);GO:0005886(plasma membrane);GO:0048194(Golgi vesicle budding)	NA	NA	NA	PREDICTED: putative phospholipid-transporting ATPase 9 [Pyrus x bretschneideri]	41.7295	131.223	3.14461	1.65288	0.00729985	0.0877302
D8674_009399	gnl|WGS:SMOL|Pdr13g000790.1	NA	00220(Arginine biosynthesis);00330(Arginine and proline metabolism)	K01476	EC:3.5.3.1	PREDICTED: calponin homology domain-containing protein DDB_G0272472-like isoform X2 [Pyrus x bretschneideri]	11.1835	35.2401	3.15108	1.65585	0.00731224	0.0878167
D8674_032328	gnl|WGS:SMOL|Pdr7g022520.1	GO:0000156(phosphorelay response regulator activity);GO:0000160(phosphorelay signal transduction system);GO:0003677(DNA binding);GO:0005515(protein binding);GO:0005634(nucleus);GO:0006351(transcription, DNA-templated);GO:0006355(regulation of transcription, DNA-templated);GO:0007623(circadian rhythm);GO:0009266(response to temperature stimulus);GO:0010017(red or far-red light signaling pathway);G…	04712(Circadian rhythm - plant)	K12130	NA	PREDICTED: two-component response regulator-like APRR5 [Pyrus x bretschneideri]	20.7968	65.3694	3.14324	1.65225	0.00735521	0.0882104
D8674_033363	gnl|WGS:SMOL|Pdr8g009090.1	GO:0005215(transporter activity);GO:0005634(nucleus);GO:0005829(cytosol);GO:0005886(plasma membrane);GO:0006810(transport);GO:0007049(cell cycle);GO:0008289(lipid binding);GO:0051301(cell division)	NA	NA	NA	PREDICTED: patellin-3-like [Pyrus x bretschneideri]	227.585	713.195	3.13376	1.64789	0.00743567	0.0887507
D8674_010156	gnl|WGS:SMOL|Pdr13g008360.1	GO:0003723(RNA binding);GO:0003729(mRNA binding);GO:0005634(nucleus);GO:0005681(spliceosomal complex);GO:0005829(cytosol);GO:0006397(mRNA processing);GO:0008380(RNA splicing);GO:0010228(vegetative to reproductive phase transition of meristem);GO:0051028(mRNA transport);GO:1901000(regulation of response to salt stress);GO:2000070(regulation of response to water deprivation)	03015(mRNA surveillance pathway)	K14411	NA	PREDICTED: heterogeneous nuclear ribonucleoprotein 1-like [Pyrus x bretschneideri]	39.032	122.367	3.13505	1.64849	0.00743825	0.0887507
D8674_000499	gnl|WGS:SMOL|Pdr1g004990.1	GO:0003674(molecular_function);GO:0005634(nucleus);GO:0005886(plasma membrane);GO:0008150(biological_process);GO:0016021(integral component of membrane)	NA	NA	NA	PREDICTED: uncharacterized protein At5g65660-like [Pyrus x bretschneideri]	2.1076	6.98473	3.31407	1.7286	0.00743843	0.0887507
D8674_023980	gnl|WGS:SMOL|Pdr4g005530.1	GO:0004674(protein serine/threonine kinase activity);GO:0005634(nucleus);GO:0005737(cytoplasm);GO:0035556(intracellular signal transduction)	NA	NA	NA	PREDICTED: serine/threonine-protein kinase AtPK2/AtPK19-like [Malus domestica]	15.378	48.2585	3.13815	1.64991	0.00746225	0.0887507
D8674_029652	gnl|WGS:SMOL|Pdr6g014600.1	GO:0005634(nucleus);GO:0005737(cytoplasm)	NA	NA	NA	PREDICTED: U-box domain-containing protein 38 [Pyrus x bretschneideri]	22.3744	70.1597	3.13571	1.64879	0.00746528	0.0887507
D8674_014773	gnl|WGS:SMOL|Pdr15g020650.1	GO:0004672(protein kinase activity);GO:0004674(protein serine/threonine kinase activity);GO:0004712(protein serine/threonine/tyrosine kinase activity);GO:0005515(protein binding);GO:0005783(endoplasmic reticulum);GO:0005886(plasma membrane);GO:0006970(response to osmotic stress);GO:0009898(cytoplasmic side of plasma membrane);GO:0016301(kinase activity);GO:0035556(intracellular signal transductio…	NA	NA	NA	PREDICTED: dual specificity protein kinase shkC-like isoform X1 [Malus domestica]	10.8425	34.0483	3.14025	1.65088	0.00747507	0.0887703
D8674_009336	gnl|WGS:SMOL|Pdr13g000160.1	GO:0009507(chloroplast)	03430(Mismatch repair)	K07456	NA	hypothetical protein DVH24_041094 [Malus domestica]	13.08	41.0698	3.13989	1.65072	0.00747851	0.0887703
D8674_010925	gnl|WGS:SMOL|Pdr14g001620.1	GO:0003677(DNA binding);GO:0003700(DNA binding transcription factor activity);GO:0005515(protein binding);GO:0005634(nucleus);GO:0006355(regulation of transcription, DNA-templated)	NA	NA	NA	PREDICTED: transcriptional activator hacA-like [Pyrus x bretschneideri]	1.10926	3.60363	3.24866	1.69985	0.00748146	0.0887703
D8674_003715	gnl|WGS:SMOL|Pdr10g018690.1	GO:0005634(nucleus);GO:0006281(DNA repair);GO:0016301(kinase activity)	04136(Autophagy - other eukaryotes)	K07203	EC:2.7.11.1	PREDICTED: serine/threonine-protein kinase TOR isoform X2 [Pyrus x bretschneideri]	20.4225	63.9288	3.13032	1.64631	0.00750608	0.0888997
D8674_014384	gnl|WGS:SMOL|Pdr15g016760.1	GO:0005524(ATP binding);GO:0009507(chloroplast);GO:0009570(chloroplast stroma);GO:0016226(iron-sulfur cluster assembly);GO:0046872(metal ion binding);GO:0051536(iron-sulfur cluster binding)	NA	NA	NA	PREDICTED: fe-S cluster assembly factor HCF101, chloroplastic [Pyrus x bretschneideri]	3.9171	12.3726	3.15861	1.65929	0.00753553	0.0891196
D8674_022879	gnl|WGS:SMOL|Pdr3g016790.1	GO:0008728(GTP diphosphokinase activity);GO:0008893(guanosine-3',5'-bis(diphosphate) 3'-diphosphatase activity);GO:0009507(chloroplast);GO:0015969(guanosine tetraphosphate metabolic process);GO:0042594(response to starvation)	NA	NA	NA	PREDICTED: putative GTP diphosphokinase RSH1, chloroplastic [Pyrus x bretschneideri]	20.4215	63.9075	3.12943	1.6459	0.00753882	0.0891196
D8674_035216	gnl|WGS:SMOL|Pdr9g006750.1	GO:0004652(polynucleotide adenylyltransferase activity);GO:0005634(nucleus);GO:0006378(mRNA polyadenylation)	03015(mRNA surveillance pathway)	K14376	EC:2.7.7.19	PREDICTED: nuclear poly(A) polymerase 4-like isoform X2 [Malus domestica]	28.6731	89.4596	3.11998	1.64154	0.00766678	0.0904057
D8674_020552	gnl|WGS:SMOL|Pdr2g005100.1	GO:0005737(cytoplasm);GO:0005829(cytosol);GO:0005886(plasma membrane);GO:0016311(dephosphorylation);GO:0016787(hydrolase activity);GO:0046872(metal ion binding);GO:0050308(sugar-phosphatase activity)	00740(Riboflavin metabolism)	K20884	EC:2.7.1.26;EC:3.1.3.102	PREDICTED: haloacid dehalogenase-like hydrolase domain-containing protein Sgpp [Pyrus x bretschneideri]	4.09507	13.0997	3.19889	1.67757	0.00769152	0.0904353
D8674_013863	gnl|WGS:SMOL|Pdr15g011550.1	GO:0005634(nucleus);GO:0008270(zinc ion binding);GO:0016021(integral component of membrane);GO:0036513(Derlin-1 retrotranslocation complex)	04141(Protein processing in endoplasmic reticulum)	K10666	EC:2.3.2.27	PREDICTED: E3 ubiquitin-protein ligase RNF185-like [Pyrus x bretschneideri]	48.6024	151.609	3.11936	1.64125	0.00769613	0.0904353
D8674_039573	gnl|WGS:SMOL|Pdr0g030880.1	GO:0005739(mitochondrion)	00500(Starch and sucrose metabolism)	K01176	EC:3.2.1.1	PREDICTED: pentatricopeptide repeat-containing protein At4g21300-like [Pyrus x bretschneideri]	0.564827	1.85267	3.28007	1.71373	0.00771626	0.0904353
D8674_041634	gnl|WGS:SMOL|Pdr0g051490.1	GO:0005634(nucleus);GO:0009416(response to light stimulus);GO:0009909(regulation of flower development)	04712(Circadian rhythm - plant)	K12135	NA	PREDICTED: zinc finger protein CONSTANS-LIKE 2-like [Pyrus x bretschneideri]	13.5448	42.3313	3.12528	1.64399	0.0077211	0.0904353
D8674_006858	gnl|WGS:SMOL|Pdr11g021190.1	NA	NA	NA	NA	PREDICTED: putative disease resistance protein RGA3 [Pyrus x bretschneideri]	7.67781	24.4369	3.1828	1.6703	0.00772202	0.0904353
D8674_013984	gnl|WGS:SMOL|Pdr15g012760.1	GO:0007275(multicellular organism development);GO:0008395(steroid hydroxylase activity);GO:0010268(brassinosteroid homeostasis);GO:0016125(sterol metabolic process);GO:0016132(brassinosteroid biosynthetic process);GO:0016709(oxidoreductase activity, acting on paired donors, with incorporation or reduction of molecular oxygen, NAD(P)H as one donor, and incorporation of one atom of oxygen)	00905(Brassinosteroid biosynthesis)	K12637	EC:1.14.13.112	PREDICTED: 3-epi-6-deoxocathasterone 23-monooxygenase-like [Malus domestica]	74.6588	232.511	3.11431	1.63891	0.00773491	0.0904459
D8674_019929	gnl|WGS:SMOL|Pdr17g018590.1	GO:0004674(protein serine/threonine kinase activity);GO:0005886(plasma membrane);GO:0006468(protein phosphorylation)	NA	NA	NA	PREDICTED: G-type lectin S-receptor-like serine/threonine-protein kinase At2g19130 [Pyrus x bretschneideri]	0.45313	1.50433	3.31987	1.73113	0.00773606	0.0904459
D8674_022816	gnl|WGS:SMOL|Pdr3g016160.1	GO:0004364(glutathione transferase activity);GO:0005737(cytoplasm);GO:0006749(glutathione metabolic process)	00480(Glutathione metabolism)	K00799	EC:2.5.1.18	hypothetical protein DVH24_002693 [Malus domestica]	4.56283	14.5344	3.18539	1.67147	0.0077373	0.0904459
D8674_041079	gnl|WGS:SMOL|Pdr0g045940.1	GO:0006474(N-terminal protein amino acid acetylation);GO:0008080(N-acetyltransferase activity)	NA	NA	NA	hypothetical protein DVH24_028069 [Malus domestica]	3.67263	11.6581	3.17432	1.66645	0.0077786	0.09076
D8674_034663	gnl|WGS:SMOL|Pdr9g001220.1	GO:0003674(molecular_function);GO:0003723(RNA binding);GO:0005739(mitochondrion);GO:0008150(biological_process)	00970(Aminoacyl-tRNA biosynthesis)	K01873	EC:6.1.1.9	PREDICTED: putative pentatricopeptide repeat-containing protein At1g26500 [Pyrus x bretschneideri]	2.91602	9.23188	3.16592	1.66262	0.00780434	0.0908916
D8674_006951	gnl|WGS:SMOL|Pdr11g022120.1	GO:0009808(lignin metabolic process);GO:0016020(membrane);GO:0016710(trans-cinnamate 4-monooxygenase activity);GO:0044550(secondary metabolite biosynthetic process)	00360(Phenylalanine metabolism);00130(Ubiquinone and other terpenoid-quinone biosynthesis);00940(Phenylpropanoid biosynthesis);00945(Stilbenoid, diarylheptanoid and gingerol biosynthesis);00941(Flavonoid biosynthesis)	K00487	EC:1.14.13.11	PREDICTED: trans-cinnamate 4-monooxygenase [Pyrus x bretschneideri]	55.2363	171.688	3.10824	1.6361	0.00784181	0.0911592
D8674_022777	gnl|WGS:SMOL|Pdr3g015770.1	GO:0004252(serine-type endopeptidase activity);GO:0005739(mitochondrion);GO:0006508(proteolysis);GO:0008236(serine-type peptidase activity);GO:0009507(chloroplast);GO:0009533(chloroplast stromal thylakoid);GO:0009535(chloroplast thylakoid membrane);GO:0009570(chloroplast stroma);GO:0009658(chloroplast organization);GO:0009941(chloroplast envelope);GO:0010206(photosystem II repair);GO:0030163(prot…	NA	NA	NA	PREDICTED: protease Do-like 2, chloroplastic [Malus domestica]	0.888313	2.90092	3.26565	1.70737	0.00786939	0.0913673
D8674_042363	gnl|WGS:SMOL|Pdr0g058780.1	NA	00220(Arginine biosynthesis);00330(Arginine and proline metabolism)	K01476	EC:3.5.3.1	PREDICTED: calponin homology domain-containing protein DDB_G0272472-like isoform X2 [Pyrus x bretschneideri]	3.69418	11.5477	3.12592	1.64428	0.00805056	0.0928834
D8674_025836	gnl|WGS:SMOL|Pdr5g003120.1	GO:0003674(molecular_function);GO:0005634(nucleus);GO:0008150(biological_process)	NA	NA	NA	hypothetical protein DVH24_009295 [Malus domestica]	4.23748	13.495	3.18468	1.67115	0.00805413	0.0928834
D8674_011278	gnl|WGS:SMOL|Pdr14g005150.1	GO:0003676(nucleic acid binding);GO:0003677(DNA binding);GO:0003700(DNA binding transcription factor activity);GO:0003723(RNA binding);GO:0005634(nucleus);GO:0006355(regulation of transcription, DNA-templated);GO:0046872(metal ion binding);GO:1900057(positive regulation of leaf senescence);GO:2000028(regulation of photoperiodism, flowering)	00040(Pentose and glucuronate interconversions);00052(Galactose metabolism);00500(Starch and sucrose metabolism);00520(Amino sugar and nucleotide sugar metabolism)	K00963	EC:2.7.7.9	PREDICTED: zinc finger CCCH domain-containing protein 14-like [Pyrus x bretschneideri]	10.1212	31.4831	3.1106	1.63719	0.00808279	0.0931002
D8674_036482	gnl|WGS:SMOL|Pdr9g019410.1	GO:0005515(protein binding);GO:0005829(cytosol);GO:0006006(glucose metabolic process);GO:0006096(glycolytic process);GO:0009409(response to cold);GO:0009416(response to light stimulus);GO:0009507(chloroplast);GO:0009535(chloroplast thylakoid membrane);GO:0009570(chloroplast stroma);GO:0009744(response to sucrose);GO:0009941(chloroplast envelope);GO:0010319(stromule);GO:0016020(membrane);GO:001925…	00710(Carbon fixation in photosynthetic organisms)	K05298	EC:1.2.1.13	PREDICTED: glyceraldehyde-3-phosphate dehydrogenase A, chloroplastic [Malus domestica]	24.38	75.41	3.09311	1.62906	0.00810348	0.0932246
D8674_043047	gnl|WGS:SMOL|Pdr0g065620.1	GO:0003674(molecular_function);GO:0005634(nucleus);GO:0009908(flower development);GO:0030154(cell differentiation)	03013(RNA transport)	K03257	NA	hypothetical protein DVH24_040458 [Malus domestica]	7.11273	22.3212	3.1382	1.64994	0.00811729	0.0933266
D8674_020895	gnl|WGS:SMOL|Pdr2g008530.1	GO:0004843(thiol-dependent ubiquitin-specific protease activity);GO:0005515(protein binding);GO:0005634(nucleus);GO:0005737(cytoplasm);GO:0005829(cytosol);GO:0006511(ubiquitin-dependent protein catabolic process);GO:0009867(jasmonic acid mediated signaling pathway);GO:0016579(protein deubiquitination);GO:0036459(thiol-dependent ubiquitinyl hydrolase activity)	NA	NA	NA	PREDICTED: MATH domain and coiled-coil domain-containing protein At3g58270-like [Pyrus x bretschneideri]	5.41158	16.8435	3.1125	1.63807	0.008144	0.0934115
D8674_001459	gnl|WGS:SMOL|Pdr1g014590.1	GO:0003674(molecular_function);GO:0005576(extracellular region);GO:0009505(plant-type cell wall);GO:0009506(plasmodesma);GO:0080167(response to karrikin)	NA	NA	NA	hypothetical protein DVH24_022702 [Malus domestica]	1.45642	4.63762	3.18425	1.67095	0.00817691	0.0936128
D8674_022562	gnl|WGS:SMOL|Pdr3g013620.1	GO:0003723(RNA binding);GO:0003729(mRNA binding);GO:0005634(nucleus);GO:0005730(nucleolus);GO:0005829(cytosol);GO:0006952(defense response);GO:0008219(cell death);GO:0009693(ethylene biosynthetic process);GO:0010150(leaf senescence)	03040(Spliceosome)	K12741	NA	PREDICTED: UBP1-associated protein 2C-like [Pyrus x bretschneideri]	22.9657	70.8763	3.08618	1.62582	0.00820293	0.09374
D8674_024797	gnl|WGS:SMOL|Pdr4g013700.1	GO:0005576(extracellular region);GO:0016614(oxidoreductase activity, acting on CH-OH group of donors);GO:0016832(aldehyde-lyase activity);GO:0050660(flavin adenine dinucleotide binding);GO:0055114(oxidation-reduction process)	NA	NA	NA	PREDICTED: protein HOTHEAD [Pyrus x bretschneideri]	9.1385	28.2273	3.08884	1.62706	0.00824945	0.0939869
D8674_021104	gnl|WGS:SMOL|Pdr2g010620.1	GO:0005509(calcium ion binding)	03013(RNA transport)	K03257	NA	hypothetical protein DVH24_006602 [Malus domestica]	5.1518	16.1251	3.13	1.64616	0.0082892	0.0943233
D8674_004092	gnl|WGS:SMOL|Pdr10g022460.1	GO:0000166(nucleotide binding);GO:0004017(adenylate kinase activity);GO:0005524(ATP binding);GO:0005575(cellular_component);GO:0005634(nucleus);GO:0005737(cytoplasm);GO:0006979(response to oxidative stress);GO:0016301(kinase activity);GO:0016310(phosphorylation);GO:0016740(transferase activity);GO:0030490(maturation of SSU-rRNA)	00230(Purine metabolism);03008(Ribosome biogenesis in eukaryotes)	K18532	EC:2.7.4.3	PREDICTED: adenylate kinase isoenzyme 6 homolog [Pyrus x bretschneideri]	23.079	71.1097	3.08115	1.62347	0.00833805	0.0947675
D8674_023887	gnl|WGS:SMOL|Pdr4g004600.1	GO:0003674(molecular_function);GO:0005634(nucleus);GO:0008150(biological_process)	NA	NA	NA	hypothetical protein DVH24_015035 [Malus domestica]	4.91329	15.968	3.24995	1.70042	0.00836466	0.0950127
D8674_031688	gnl|WGS:SMOL|Pdr7g016120.1	GO:0000139(Golgi membrane);GO:0005739(mitochondrion);GO:0005768(endosome);GO:0005794(Golgi apparatus);GO:0005802(trans-Golgi network);GO:0006486(protein glycosylation);GO:0006665(sphingolipid metabolic process);GO:0007155(cell adhesion);GO:0007275(multicellular organism development);GO:0008219(cell death);GO:0009737(response to abscisic acid);GO:0009738(abscisic acid-activated signaling pathway);…	NA	NA	NA	PREDICTED: glycosyltransferase family 64 protein C4 [Pyrus x bretschneideri]	30.4604	93.7038	3.07625	1.62117	0.00837775	0.095047
D8674_000763	gnl|WGS:SMOL|Pdr1g007630.1	GO:0003674(molecular_function);GO:0008150(biological_process);GO:0016021(integral component of membrane)	NA	NA	NA	PREDICTED: uncharacterized protein LOC103964229 [Pyrus x bretschneideri]	40.6926	125.002	3.07187	1.61912	0.00842306	0.0954461
D8674_015893	gnl|WGS:SMOL|Pdr16g002980.1	GO:0005634(nucleus);GO:0005829(cytosol)	NA	NA	NA	PREDICTED: RNA polymerase II degradation factor 1-like [Pyrus x bretschneideri]	108.784	333.691	3.06747	1.61705	0.00845918	0.0957979
D8674_009022	gnl|WGS:SMOL|Pdr12g017300.1	GO:0005351(carbohydrate:proton symporter activity);GO:0005355(glucose transmembrane transporter activity);GO:0005887(integral component of plasma membrane);GO:0046323(glucose import)	NA	NA	NA	PREDICTED: putative polyol transporter 1 [Pyrus x bretschneideri]	31.419	96.4318	3.06922	1.61787	0.00848449	0.0959722
D8674_013833	gnl|WGS:SMOL|Pdr15g011250.1	GO:0005886(plasma membrane);GO:0009416(response to light stimulus);GO:0016567(protein ubiquitination)	03050(Proteasome)	K03063	NA	PREDICTED: BTB/POZ domain-containing protein At5g66560-like [Pyrus x bretschneideri]	1.14823	3.62341	3.15564	1.65793	0.00850124	0.0959862
D8674_004626	gnl|WGS:SMOL|Pdr10g027800.1	GO:0006633(fatty acid biosynthetic process);GO:0009507(chloroplast);GO:0016020(membrane);GO:0045300(acyl-[acyl-carrier-protein] desaturase activity);GO:0046872(metal ion binding);GO:0055114(oxidation-reduction process);GO:0102786(stearoyl-[acp] desaturase activity)	00061(Fatty acid biosynthesis);01040(Biosynthesis of unsaturated fatty acids)	K03921	EC:1.14.19.2;EC:1.14.19.11	PREDICTED: stearoyl-[acyl-carrier-protein] 9-desaturase 6, chloroplastic-like [Pyrus x bretschneideri]	88.8032	272.119	3.06429	1.61555	0.00853471	0.0963065
D8674_012479	gnl|WGS:SMOL|Pdr14g017160.1	GO:0003674(molecular_function);GO:0005634(nucleus);GO:0008150(biological_process);GO:0031262(Ndc80 complex)	NA	NA	NA	PREDICTED: probable kinetochore protein SPC25 [Pyrus x bretschneideri]	2.9716	9.29529	3.12804	1.64526	0.00856452	0.0964122
D8674_003952	gnl|WGS:SMOL|Pdr10g021060.1	GO:0003676(nucleic acid binding);GO:0003690(double-stranded DNA binding);GO:0003725(double-stranded RNA binding);GO:0005515(protein binding);GO:0005634(nucleus);GO:0005681(spliceosomal complex);GO:0006397(mRNA processing);GO:0008270(zinc ion binding);GO:0008380(RNA splicing);GO:0009845(seed germination);GO:0015030(Cajal body);GO:0080188(RNA-directed DNA methylation)	NA	NA	NA	PREDICTED: LOW QUALITY PROTEIN: uncharacterized protein LOC103454492 [Malus domestica]	4.01434	12.6612	3.15398	1.65717	0.00857763	0.0964687
D8674_004024	gnl|WGS:SMOL|Pdr10g021780.1	GO:0003824(catalytic activity);GO:0004467(long-chain fatty acid-CoA ligase activity);GO:0005524(ATP binding);GO:0005634(nucleus);GO:0005783(endoplasmic reticulum);GO:0006631(fatty acid metabolic process);GO:0006633(fatty acid biosynthetic process);GO:0008152(metabolic process);GO:0009506(plasmodesma);GO:0010025(wax biosynthetic process);GO:0010143(cutin biosynthetic process);GO:0010311(lateral ro…	00061(Fatty acid biosynthesis);00071(Fatty acid degradation);04146(Peroxisome)	K01897	EC:6.2.1.3	PREDICTED: long chain acyl-CoA synthetase 2-like [Pyrus x bretschneideri]	5.64079	17.3256	3.07149	1.61894	0.00857977	0.0964687
D8674_022040	gnl|WGS:SMOL|Pdr3g008400.1	NA	NA	NA	NA	leucine-rich repeat extensin-like protein 3 [Prunus avium]	9.64236	29.963	3.10743	1.63572	0.00862547	0.0968671
D8674_016060	gnl|WGS:SMOL|Pdr16g004650.1	GO:0003674(molecular_function);GO:0005739(mitochondrion);GO:0008150(biological_process)	NA	NA	NA	PREDICTED: putative pentatricopeptide repeat-containing protein At1g13630 [Pyrus x bretschneideri]	1.79891	5.60807	3.11749	1.64039	0.0086584	0.0971213
D8674_030147	gnl|WGS:SMOL|Pdr7g000710.1	GO:0003677(DNA binding);GO:0005634(nucleus);GO:0008150(biological_process);GO:0008270(zinc ion binding)	NA	NA	NA	PREDICTED: zinc finger A20 and AN1 domain-containing stress-associated protein 8-like isoform X1 [Pyrus x bretschneideri]	239.734	732.471	3.05535	1.61134	0.00866502	0.0971378
D8674_022508	gnl|WGS:SMOL|Pdr3g013080.1	GO:0004674(protein serine/threonine kinase activity);GO:0005829(cytosol);GO:0006468(protein phosphorylation);GO:0035556(intracellular signal transduction)	NA	NA	NA	PREDICTED: transcription factor EMB1444-like [Pyrus x bretschneideri]	1.24886	3.94826	3.16148	1.6606	0.00870797	0.0975034
D8674_037459	gnl|WGS:SMOL|Pdr0g009740.1	GO:0000386(second spliceosomal transesterification activity);GO:0005681(spliceosomal complex)	03040(Spliceosome)	K12819	NA	PREDICTED: pre-mRNA-splicing factor SLU7-like isoform X1 [Pyrus x bretschneideri]	4.21012	12.9965	3.08698	1.62619	0.00874387	0.0977893
D8674_000575	gnl|WGS:SMOL|Pdr1g005750.1	GO:0009507(chloroplast);GO:0016021(integral component of membrane)	NA	NA	NA	hypothetical protein DVH24_014270 [Malus domestica]	1.12178	3.62661	3.23291	1.69283	0.00875868	0.0978969
D8674_009104	gnl|WGS:SMOL|Pdr12g018120.1	GO:0004674(protein serine/threonine kinase activity);GO:0005886(plasma membrane);GO:0006468(protein phosphorylation)	00230(Purine metabolism);00240(Pyrimidine metabolism);03020(RNA polymerase)	K03021	EC:2.7.7.6	PREDICTED: LRR receptor-like serine/threonine-protein kinase GSO2 [Pyrus x bretschneideri]	0.806901	2.54264	3.15112	1.65587	0.0087715	0.0979393
D8674_012873	gnl|WGS:SMOL|Pdr15g001650.1	GO:0000977(RNA polymerase II regulatory region sequence-specific DNA binding);GO:0003700(DNA binding transcription factor activity);GO:0005515(protein binding);GO:0005634(nucleus);GO:0005737(cytoplasm);GO:0006351(transcription, DNA-templated);GO:0009739(response to gibberellin);GO:0010076(maintenance of floral meristem identity);GO:0010077(maintenance of inflorescence meristem identity);GO:001022…	NA	NA	NA	dormancy-associated MADS-box transcription factor [Pyrus pyrifolia var. culta]	5.99972	18.5051	3.08432	1.62495	0.00881182	0.0982
D8674_004196	gnl|WGS:SMOL|Pdr10g023500.1	GO:0000785(chromatin);GO:0000976(transcription regulatory region sequence-specific DNA binding);GO:0003682(chromatin binding);GO:0005677(chromatin silencing complex);GO:0006342(chromatin silencing);GO:0031507(heterochromatin assembly)	NA	NA	NA	PREDICTED: chromatin remodeling protein SHL-like [Malus domestica]	60.358	183.99	3.04832	1.60801	0.00882013	0.0982346
D8674_008140	gnl|WGS:SMOL|Pdr12g008480.1	GO:0004674(protein serine/threonine kinase activity);GO:0005829(cytosol);GO:0006355(regulation of transcription, DNA-templated);GO:0006468(protein phosphorylation);GO:0035556(intracellular signal transduction)	NA	NA	NA	PREDICTED: uncharacterized protein LOC103949378 [Pyrus x bretschneideri]	31.4502	95.7063	3.0431	1.60554	0.00891634	0.0990722
D8674_008279	gnl|WGS:SMOL|Pdr12g009870.1	GO:0000209(protein polyubiquitination);GO:0043161(proteasome-mediated ubiquitin-dependent protein catabolic process);GO:0061630(ubiquitin protein ligase activity)	NA	NA	NA	hypothetical protein PRUPE_6G245100 [Prunus persica]	1.29507	4.13319	3.19147	1.67422	0.0089698	0.0995489
D8674_016823	gnl|WGS:SMOL|Pdr16g012280.1	GO:0005634(nucleus);GO:0009414(response to water deprivation);GO:0009785(blue light signaling pathway);GO:0010161(red light signaling pathway)	NA	NA	NA	PREDICTED: protein DEHYDRATION-INDUCED 19 homolog 4 [Malus domestica]	0.647315	2.14632	3.31572	1.72932	0.00900759	0.0998509
D8674_031404	gnl|WGS:SMOL|Pdr7g013280.1	GO:0005634(nucleus);GO:0005737(cytoplasm)	NA	NA	NA	hypothetical protein DVH24_023910 [Malus domestica]	18.6477	56.6396	3.03735	1.60281	0.00905662	0.100213
D8674_011713	gnl|WGS:SMOL|Pdr14g009500.1	GO:0004190(aspartic-type endopeptidase activity);GO:0006508(proteolysis);GO:0030163(protein catabolic process)	NA	NA	NA	PREDICTED: aspartic proteinase-like protein 2 [Pyrus x bretschneideri]	1.81456	5.62394	3.09933	1.63196	0.00910967	0.100569
D8674_001464	gnl|WGS:SMOL|Pdr1g014640.1	GO:0005773(vacuole);GO:0005774(vacuolar membrane);GO:0005794(Golgi apparatus);GO:0005886(plasma membrane);GO:0009506(plasmodesma)	NA	NA	NA	PREDICTED: hypersensitive-induced response protein 4 [Pyrus x bretschneideri]	24.1152	73.1173	3.032	1.60027	0.0091715	0.101192
D8674_014906	gnl|WGS:SMOL|Pdr15g021980.1	GO:0005515(protein binding);GO:0005634(nucleus);GO:0005829(cytosol);GO:0006351(transcription, DNA-templated);GO:0006355(regulation of transcription, DNA-templated);GO:0010072(primary shoot apical meristem specification)	NA	NA	NA	PREDICTED: topless-related protein 1-like isoform X2 [Pyrus x bretschneideri]	4.41536	13.4397	3.04386	1.6059	0.00918845	0.10132
D8674_001259	gnl|WGS:SMOL|Pdr1g012590.1	GO:0004842(ubiquitin-protein transferase activity);GO:0005515(protein binding);GO:0005634(nucleus);GO:0006511(ubiquitin-dependent protein catabolic process);GO:0006952(defense response);GO:0009611(response to wounding);GO:0009625(response to insect);GO:0009641(shade avoidance);GO:0009753(response to jasmonic acid);GO:0009861(jasmonic acid and ethylene-dependent systemic resistance);GO:0009867(jas…	04075(Plant hormone signal transduction)	K13463	NA	hypothetical protein DVH24_024266 [Malus domestica]	98.3826	297.177	3.02063	1.59485	0.00926894	0.102088
D8674_029586	gnl|WGS:SMOL|Pdr6g013940.1	GO:0003674(molecular_function);GO:0008150(biological_process);GO:0009507(chloroplast);GO:0016021(integral component of membrane)	NA	NA	NA	hypothetical protein DVH24_008709 [Malus domestica]	1.11916	3.44989	3.08257	1.62414	0.00938958	0.103176
D8674_000541	gnl|WGS:SMOL|Pdr1g005410.1	GO:0003674(molecular_function);GO:0006952(defense response);GO:0016020(membrane)	NA	NA	NA	hypothetical protein DVH24_014558 [Malus domestica]	38.7963	117.072	3.01761	1.5934	0.00941223	0.103365
D8674_023482	gnl|WGS:SMOL|Pdr4g000550.1	NA	NA	NA	NA	PREDICTED: R3H domain-containing protein 1-like [Pyrus x bretschneideri]	18.717	56.4856	3.01788	1.59354	0.00943825	0.10359
D8674_014953	gnl|WGS:SMOL|Pdr15g022450.1	GO:0009507(chloroplast);GO:0009534(chloroplast thylakoid);GO:0009535(chloroplast thylakoid membrane);GO:0009579(thylakoid);GO:0009735(response to cytokinin);GO:0009941(chloroplast envelope);GO:0015078(proton transmembrane transporter activity);GO:0015986(ATP synthesis coupled proton transport);GO:0016020(membrane);GO:0016021(integral component of membrane);GO:0016787(hydrolase activity);GO:004274…	00190(Oxidative phosphorylation);00195(Photosynthesis)	K02109	NA	PREDICTED: ATP synthase subunit b', chloroplastic-like [Pyrus x bretschneideri]	105.451	317.684	3.01264	1.59103	0.00946798	0.103856
D8674_021823	gnl|WGS:SMOL|Pdr3g006230.1	GO:0005739(mitochondrion);GO:0008150(biological_process);GO:0043231(intracellular membrane-bounded organelle)	NA	NA	NA	PREDICTED: pentatricopeptide repeat-containing protein At5g27110 [Pyrus x bretschneideri]	0.463359	1.46759	3.16729	1.66325	0.00951166	0.104214
D8674_028931	gnl|WGS:SMOL|Pdr6g007390.1	GO:0047037(salutaridine reductase (NADPH) activity);GO:0050661(NADP binding);GO:0097295(morphine biosynthetic process)	00902(Monoterpenoid biosynthesis)	K15095	EC:1.1.1.208	PREDICTED: salutaridine reductase-like [Pyrus x bretschneideri]	23.4754	70.7739	3.01481	1.59207	0.00952364	0.104285
D8674_007394	gnl|WGS:SMOL|Pdr12g001020.1	GO:0003676(nucleic acid binding);GO:0003723(RNA binding);GO:0005515(protein binding);GO:0005634(nucleus);GO:0005737(cytoplasm);GO:0006351(transcription, DNA-templated);GO:0006355(regulation of transcription, DNA-templated);GO:0009911(positive regulation of flower development)	NA	NA	NA	hypothetical protein DVH24_036790 [Malus domestica]	18.3691	55.2076	3.00546	1.58759	0.00965426	0.105409
D8674_002552	gnl|WGS:SMOL|Pdr10g007060.1	GO:0003824(catalytic activity);GO:0005524(ATP binding);GO:0005739(mitochondrion);GO:0005777(peroxisome);GO:0005778(peroxisomal membrane);GO:0008152(metabolic process);GO:0008756(o-succinylbenzoate-CoA ligase activity);GO:0009507(chloroplast);GO:0016021(integral component of membrane);GO:0016208(AMP binding);GO:0031969(chloroplast membrane);GO:0042372(phylloquinone biosynthetic process)	00130(Ubiquinone and other terpenoid-quinone biosynthesis)	K14760	EC:6.2.1.26	PREDICTED: 2-succinylbenzoate--CoA ligase, chloroplastic/peroxisomal [Pyrus x bretschneideri]	1.45341	4.48713	3.08731	1.62635	0.00980651	0.106824
D8674_024847	gnl|WGS:SMOL|Pdr4g014200.1	GO:0005634(nucleus);GO:0008150(biological_process);GO:0030246(carbohydrate binding)	NA	NA	NA	hypothetical protein DVH24_007964 [Malus domestica]	6.91028	20.7627	3.0046	1.58717	0.00983756	0.107039
D8674_000532	gnl|WGS:SMOL|Pdr1g005320.1	GO:0008194(UDP-glycosyltransferase activity);GO:0009247(glycolipid biosynthetic process);GO:0009507(chloroplast);GO:0009707(chloroplast outer membrane);GO:0016036(cellular response to phosphate starvation);GO:0016757(transferase activity, transferring glycosyl groups);GO:0019375(galactolipid biosynthetic process);GO:0035250(UDP-galactosyltransferase activity);GO:0046481(digalactosyldiacylglycerol…	00561(Glycerolipid metabolism)	K09480	EC:2.4.1.241	PREDICTED: digalactosyldiacylglycerol synthase 2, chloroplastic-like [Pyrus x bretschneideri]	115.927	346.635	2.99012	1.5802	0.00985218	0.107074
D8674_009103	gnl|WGS:SMOL|Pdr12g018110.1	GO:0002239(response to oomycetes);GO:0005618(cell wall);GO:0006952(defense response);GO:0007165(signal transduction);GO:0050832(defense response to fungus)	04626(Plant-pathogen interaction)	K13466	NA	PREDICTED: LRR receptor-like serine/threonine-protein kinase GSO2 [Pyrus x bretschneideri]	0.56983	1.78029	3.12425	1.64351	0.00990767	0.10743
D8674_001697	gnl|WGS:SMOL|Pdr1g016970.1	GO:0005737(cytoplasm);GO:0006537(glutamate biosynthetic process);GO:0015930(glutamate synthase activity);GO:0019676(ammonia assimilation cycle)	00910(Nitrogen metabolism);00250(Alanine, aspartate and glutamate metabolism)	K00264	EC:1.4.1.13;EC:1.4.1.14	hypothetical protein DVH24_022418 [Malus domestica]	61.7059	184.232	2.98565	1.57804	0.00992802	0.107561
D8674_023117	gnl|WGS:SMOL|Pdr3g019170.1	GO:0003684(damaged DNA binding);GO:0005524(ATP binding);GO:0005634(nucleus);GO:0005737(cytoplasm);GO:0006298(mismatch repair)	NA	NA	NA	PREDICTED: SMR domain-containing protein At5g58720-like [Pyrus x bretschneideri]	65.5359	195.764	2.98713	1.57876	0.00993115	0.107561
D8674_004860	gnl|WGS:SMOL|Pdr11g001210.1	GO:0005982(starch metabolic process);GO:0005985(sucrose metabolic process);GO:0005986(sucrose biosynthetic process);GO:0008194(UDP-glycosyltransferase activity);GO:0009414(response to water deprivation);GO:0009507(chloroplast);GO:0010431(seed maturation);GO:0010555(response to mannitol);GO:0016157(sucrose synthase activity);GO:0016757(transferase activity, transferring glycosyl groups)	00500(Starch and sucrose metabolism)	K00695	EC:2.4.1.13	sucrose synthase 1 [Pyrus pyrifolia]	802.741	2391.72	2.97944	1.57504	0.0100421	0.108513
D8674_018756	gnl|WGS:SMOL|Pdr17g006860.1	GO:0003674(molecular_function);GO:0005634(nucleus);GO:0005737(cytoplasm);GO:0005829(cytosol);GO:0010043(response to zinc ion)	NA	NA	NA	PREDICTED: nitrile-specifier protein 5 [Pyrus x bretschneideri]	31.6172	94.3686	2.98473	1.5776	0.0100495	0.108531
D8674_018951	gnl|WGS:SMOL|Pdr17g008810.1	GO:0005576(extracellular region);GO:0005886(plasma membrane);GO:0006468(protein phosphorylation);GO:0019199(transmembrane receptor protein kinase activity)	04016(MAPK signaling pathway - plant)	K20718	EC:2.7.11.1	PREDICTED: receptor-like protein kinase [Pyrus x bretschneideri]	0.658891	2.0255	3.0741	1.62017	0.0100982	0.108833
D8674_034589	gnl|WGS:SMOL|Pdr9g000480.1	GO:0003677(DNA binding);GO:0003700(DNA binding transcription factor activity);GO:0005634(nucleus);GO:0006355(regulation of transcription, DNA-templated);GO:0007623(circadian rhythm);GO:0009734(auxin-activated signaling pathway);GO:0009851(auxin biosynthetic process);GO:0010600(regulation of auxin biosynthetic process)	04712(Circadian rhythm - plant)	K12133	NA	PREDICTED: protein REVEILLE 1-like isoform X1 [Pyrus x bretschneideri]	6.63002	19.8407	2.99255	1.58138	0.010102	0.108833
D8674_006582	gnl|WGS:SMOL|Pdr11g018430.1	GO:0003676(nucleic acid binding);GO:0003729(mRNA binding);GO:0005515(protein binding);GO:0005654(nucleoplasm);GO:0051028(mRNA transport)	03040(Spliceosome);03013(RNA transport);03015(mRNA surveillance pathway)	K12881	NA	PREDICTED: THO complex subunit 4A-like [Pyrus x bretschneideri]	80.3003	239.054	2.977	1.57386	0.0101143	0.108833
D8674_013887	gnl|WGS:SMOL|Pdr15g011790.1	GO:0003700(DNA binding transcription factor activity);GO:0005634(nucleus);GO:0006355(regulation of transcription, DNA-templated);GO:0030154(cell differentiation);GO:0043565(sequence-specific DNA binding);GO:0048831(regulation of shoot system development)	04075(Plant hormone signal transduction)	K14494	NA	PREDICTED: scarecrow-like protein 15 [Pyrus x bretschneideri]	0.453246	1.4709	3.24527	1.69834	0.0102109	0.109584
D8674_026792	gnl|WGS:SMOL|Pdr5g012680.1	NA	00906(Carotenoid biosynthesis)	K02293	EC:1.3.5.5	PREDICTED: uncharacterized protein LOC103946614 isoform X1 [Pyrus x bretschneideri]	17.754	52.8508	2.97684	1.57378	0.0102442	0.109823
D8674_003567	gnl|WGS:SMOL|Pdr10g017210.1	NA	NA	NA	NA	hypothetical protein DVH24_034437 [Malus domestica]	23.0624	68.688	2.97835	1.57451	0.0103286	0.110533
D8674_036616	gnl|WGS:SMOL|Pdr0g001310.1	GO:0003674(molecular_function);GO:0005576(extracellular region);GO:0005886(plasma membrane);GO:0008150(biological_process);GO:0016020(membrane)	00270(Cysteine and methionine metabolism)	K00789	EC:2.5.1.6	PREDICTED: inter-alpha-trypsin inhibitor heavy chain H3 [Malus domestica]	2.15779	6.56775	3.04374	1.60584	0.0103575	0.110716
D8674_005598	gnl|WGS:SMOL|Pdr11g008590.1	GO:0003743(translation initiation factor activity);GO:0005737(cytoplasm);GO:0006413(translational initiation);GO:0006417(regulation of translation)	03013(RNA transport)	K03113	NA	Eukaryotic translation initiation factor SUI [Parasponia andersonii]	518.895	1537.68	2.96338	1.56724	0.0103729	0.110751
D8674_006510	gnl|WGS:SMOL|Pdr11g017710.1	GO:0009507(chloroplast);GO:0016567(protein ubiquitination)	NA	NA	NA	PREDICTED: BTB/POZ domain-containing protein At5g60050 [Pyrus x bretschneideri]	23.4788	69.6353	2.96587	1.56846	0.0103842	0.110751
D8674_028393	gnl|WGS:SMOL|Pdr6g002010.1	GO:0004849(uridine kinase activity);GO:0005829(cytosol);GO:0006206(pyrimidine nucleobase metabolic process);GO:0009507(chloroplast);GO:0043097(pyrimidine nucleoside salvage)	00710(Carbon fixation in photosynthetic organisms)	K00855	EC:2.7.1.19	PREDICTED: phosphoribulokinase, chloroplastic [Pyrus x bretschneideri]	81.895	242.427	2.96022	1.5657	0.0104626	0.111148
D8674_013912	gnl|WGS:SMOL|Pdr15g012040.1	GO:0003674(molecular_function);GO:0008150(biological_process);GO:0009507(chloroplast)	NA	NA	NA	PREDICTED: uncharacterized protein LOC103960823 [Pyrus x bretschneideri]	10.2491	30.6418	2.98972	1.58001	0.0105384	0.111711
D8674_038282	gnl|WGS:SMOL|Pdr0g017970.1	GO:0003676(nucleic acid binding);GO:0003690(double-stranded DNA binding);GO:0003725(double-stranded RNA binding);GO:0005515(protein binding);GO:0005634(nucleus);GO:0005681(spliceosomal complex);GO:0006397(mRNA processing);GO:0008270(zinc ion binding);GO:0008380(RNA splicing);GO:0009845(seed germination);GO:0015030(Cajal body);GO:0080188(RNA-directed DNA methylation)	NA	NA	NA	PREDICTED: LOW QUALITY PROTEIN: uncharacterized protein LOC103454492 [Malus domestica]	1.98775	6.24093	3.13969	1.65062	0.0105395	0.111711
D8674_026040	gnl|WGS:SMOL|Pdr5g005160.1	GO:0003674(molecular_function);GO:0008150(biological_process)	NA	NA	NA	PREDICTED: uncharacterized protein LOC103967948 [Pyrus x bretschneideri]	2.09257	6.36441	3.04144	1.60475	0.0109217	0.114391
D8674_025791	gnl|WGS:SMOL|Pdr5g002670.1	GO:0003723(RNA binding);GO:0005739(mitochondrion);GO:0008150(biological_process)	NA	NA	NA	PREDICTED: pentatricopeptide repeat-containing protein At1g77360, mitochondrial-like [Pyrus x bretschneideri]	18.1642	53.4856	2.94457	1.55806	0.0109256	0.114391
D8674_012697	gnl|WGS:SMOL|Pdr14g019340.1	GO:0003677(DNA binding);GO:0003700(DNA binding transcription factor activity);GO:0005634(nucleus);GO:0006351(transcription, DNA-templated);GO:0006355(regulation of transcription, DNA-templated);GO:0009873(ethylene-activated signaling pathway)	04626(Plant-pathogen interaction)	K13434	NA	PREDICTED: ethylene-responsive transcription factor ERF118-like [Pyrus x bretschneideri]	5.09974	15.1169	2.96425	1.56767	0.010968	0.114644
D8674_033124	gnl|WGS:SMOL|Pdr8g006700.1	GO:0003723(RNA binding);GO:0003727(single-stranded RNA binding);GO:0004519(endonuclease activity);GO:0005739(mitochondrion);GO:0006417(regulation of translation);GO:0009451(RNA modification);GO:0009507(chloroplast);GO:0009534(chloroplast thylakoid);GO:0009570(chloroplast stroma);GO:0009658(chloroplast organization);GO:0010239(chloroplast mRNA processing);GO:0042644(chloroplast nucleoid);GO:004265…	00940(Phenylpropanoid biosynthesis);00945(Stilbenoid, diarylheptanoid and gingerol biosynthesis);00941(Flavonoid biosynthesis)	K13065	EC:2.3.1.133	PREDICTED: vinorine synthase-like [Malus domestica]	7.95895	23.4139	2.94183	1.55671	0.010993	0.114778
D8674_015146	gnl|WGS:SMOL|Pdr15g024380.1	NA	NA	NA	NA	hypothetical protein DVH24_029748 [Malus domestica]	1.29264	4.00615	3.0992	1.6319	0.0110178	0.11488
D8674_024834	gnl|WGS:SMOL|Pdr4g014070.1	GO:0003978(UDP-glucose 4-epimerase activity);GO:0005794(Golgi apparatus);GO:0005829(cytosol);GO:0005886(plasma membrane);GO:0006012(galactose metabolic process);GO:0033358(UDP-L-arabinose biosynthetic process);GO:0045227(capsule polysaccharide biosynthetic process);GO:0046369(galactose biosynthetic process);GO:0046983(protein dimerization activity);GO:0050373(UDP-arabinose 4-epimerase activity);G…	00052(Galactose metabolism);00520(Amino sugar and nucleotide sugar metabolism)	K01784	EC:5.1.3.2	PREDICTED: bifunctional UDP-glucose 4-epimerase and UDP-xylose 4-epimerase 1 [Pyrus x bretschneideri]	457.216	1340.61	2.93211	1.55194	0.0110331	0.11488
D8674_028528	gnl|WGS:SMOL|Pdr6g003360.1	GO:0004176(ATP-dependent peptidase activity);GO:0005739(mitochondrion);GO:0006508(proteolysis);GO:0008237(metallopeptidase activity);GO:0009941(chloroplast envelope);GO:0010304(PSII associated light-harvesting complex II catabolic process)	NA	NA	NA	PREDICTED: ATP-dependent zinc metalloprotease FTSH 11, chloroplastic/mitochondrial [Pyrus x bretschneideri]	25.2846	74.1931	2.93432	1.55302	0.0110549	0.11498
D8674_017749	gnl|WGS:SMOL|Pdr16g021540.1	GO:0005739(mitochondrion);GO:0008150(biological_process)	NA	NA	NA	hypothetical protein DVH24_015603, partial [Malus domestica]	80.0246	234.62	2.93184	1.55181	0.0110667	0.115001
D8674_014728	gnl|WGS:SMOL|Pdr15g020200.1	NA	NA	NA	NA	-	5.02675	14.957	2.97549	1.57313	0.0110921	0.115075
D8674_024107	gnl|WGS:SMOL|Pdr4g006800.1	GO:0000062(fatty-acyl-CoA binding);GO:0003995(acyl-CoA dehydrogenase activity);GO:0005777(peroxisome);GO:0009055(electron transfer activity);GO:0033539(fatty acid beta-oxidation using acyl-CoA dehydrogenase);GO:0050660(flavin adenine dinucleotide binding);GO:0052890(oxidoreductase activity, acting on the CH-CH group of donors, with a flavin as acceptor);GO:0055088(lipid homeostasis)	00071(Fatty acid degradation);00592(alpha-Linolenic acid metabolism);01040(Biosynthesis of unsaturated fatty acids);04146(Peroxisome)	K00232	EC:1.3.3.6	PREDICTED: acyl-coenzyme A oxidase 4, peroxisomal-like [Malus domestica]	17.0435	50.0162	2.93462	1.55318	0.0111225	0.115208
D8674_032795	gnl|WGS:SMOL|Pdr8g003410.1	GO:0005515(protein binding);GO:0005524(ATP binding);GO:0005576(extracellular region);GO:0006952(defense response);GO:0043531(ADP binding)	NA	NA	NA	PREDICTED: putative disease resistance protein RGA1 [Pyrus x bretschneideri]	4.17485	12.2893	2.94365	1.5576	0.0111327	0.115217
D8674_041340	gnl|WGS:SMOL|Pdr0g048550.1	GO:0000775(chromosome, centromeric region);GO:0005634(nucleus);GO:0005783(endoplasmic reticulum);GO:0009506(plasmodesma);GO:0016279(protein-lysine N-methyltransferase activity);GO:0018024(histone-lysine N-methyltransferase activity)	00310(Lysine degradation)	K11423	EC:2.1.1.43	PREDICTED: histone-lysine N-methyltransferase ASHH3 isoform X1 [Malus domestica]	7.07427	20.9311	2.95876	1.56499	0.0111552	0.11535
D8674_022478	gnl|WGS:SMOL|Pdr3g012780.1	GO:0003674(molecular_function);GO:0008150(biological_process);GO:0009507(chloroplast)	NA	NA	NA	PREDICTED: uncharacterized protein LOC103947616 [Pyrus x bretschneideri]	1.31478	4.0197	3.05733	1.61227	0.0112183	0.115849
D8674_016022	gnl|WGS:SMOL|Pdr16g004270.1	NA	NA	NA	NA	-	2.6621	8.18127	3.07324	1.61976	0.0113963	0.117367
D8674_042884	gnl|WGS:SMOL|Pdr0g063990.1	GO:0000460(maturation of 5.8S rRNA);GO:0004004(ATP-dependent RNA helicase activity);GO:0005524(ATP binding);GO:0005634(nucleus);GO:0005654(nucleoplasm);GO:0005730(nucleolus);GO:0006364(rRNA processing);GO:0006401(RNA catabolic process);GO:0008026(ATP-dependent helicase activity);GO:0019843(rRNA binding);GO:0031125(rRNA 3'-end processing)	03018(RNA degradation)	K12598	EC:3.6.4.13	PREDICTED: zinc finger CCCH domain-containing protein 5 isoform X1 [Malus domestica]	18.9762	55.3734	2.91804	1.545	0.0114031	0.117367
D8674_023910	gnl|WGS:SMOL|Pdr4g004830.1	GO:0003723(RNA binding);GO:0004818(glutamate-tRNA ligase activity);GO:0004819(glutamine-tRNA ligase activity);GO:0005739(mitochondrion);GO:0005829(cytosol);GO:0006424(glutamyl-tRNA aminoacylation);GO:0006425(glutaminyl-tRNA aminoacylation)	00860(Porphyrin and chlorophyll metabolism);00970(Aminoacyl-tRNA biosynthesis)	K01885	EC:6.1.1.17	PREDICTED: glutamate--tRNA ligase, cytoplasmic [Pyrus x bretschneideri]	76.3905	222.772	2.91623	1.5441	0.0114088	0.117367
D8674_035442	gnl|WGS:SMOL|Pdr9g009010.1	GO:0004439(phosphatidylinositol-4,5-bisphosphate 5-phosphatase activity);GO:0005634(nucleus);GO:0005774(vacuolar membrane);GO:0007033(vacuole organization);GO:0036092(phosphatidylinositol-3-phosphate biosynthetic process);GO:0042578(phosphoric ester hydrolase activity)	00562(Inositol phosphate metabolism);04070(Phosphatidylinositol signaling system)	K21797	EC:3.1.3.-	PREDICTED: phosphoinositide phosphatase SAC2-like [Pyrus x bretschneideri]	16.137	47.0615	2.91638	1.54418	0.0114526	0.117753
D8674_027893	gnl|WGS:SMOL|Pdr5g023690.1	GO:0005794(Golgi apparatus);GO:0005829(cytosol);GO:0009832(plant-type cell wall biogenesis);GO:0033356(UDP-L-arabinose metabolic process);GO:0052691(UDP-arabinopyranose mutase activity)	00520(Amino sugar and nucleotide sugar metabolism)	K13379	EC:2.4.1.-;EC:5.4.99.30	PREDICTED: uncharacterized protein LOC103932467 isoform X1 [Pyrus x bretschneideri]	3.19708	9.41578	2.94511	1.55832	0.0114767	0.117872
D8674_030194	gnl|WGS:SMOL|Pdr7g001180.1	GO:0003924(GTPase activity);GO:0005509(calcium ion binding);GO:0005739(mitochondrion);GO:0009737(response to abscisic acid);GO:0010821(regulation of mitochondrion organization);GO:0047497(mitochondrion transport along microtubule)	NA	NA	NA	PREDICTED: uncharacterized protein LOC103958384 [Pyrus x bretschneideri]	0.728051	2.25354	3.09531	1.63008	0.0116395	0.118965
D8674_022658	gnl|WGS:SMOL|Pdr3g014580.1	NA	NA	NA	NA	PREDICTED: miraculin-like [Pyrus x bretschneideri]	3.09348	9.25466	2.99167	1.58095	0.0116424	0.118965
D8674_041822	gnl|WGS:SMOL|Pdr0g053370.1	NA	NA	NA	NA	-	4.52075	13.5509	2.99749	1.58376	0.0116462	0.118965
D8674_036663	gnl|WGS:SMOL|Pdr0g001780.1	GO:0000784(nuclear chromosome, telomeric region);GO:0003691(double-stranded telomeric DNA binding);GO:0031627(telomeric loop formation)	NA	NA	NA	PREDICTED: single myb histone 4-like isoform X1 [Pyrus x bretschneideri]	28.6597	83.4111	2.91039	1.54121	0.0116553	0.118994
D8674_019935	gnl|WGS:SMOL|Pdr17g018650.1	GO:0004004(ATP-dependent RNA helicase activity);GO:0005634(nucleus);GO:0005737(cytoplasm);GO:0006396(RNA processing)	03018(RNA degradation)	K14442	EC:3.6.4.13	PREDICTED: uncharacterized protein LOC103959880 [Pyrus x bretschneideri]	2.21034	6.46312	2.92403	1.54796	0.0117389	0.119718
D8674_005034	gnl|WGS:SMOL|Pdr11g002950.1	GO:0003729(mRNA binding);GO:0003824(catalytic activity);GO:0005515(protein binding);GO:0006364(rRNA processing);GO:0008266(poly(U) RNA binding);GO:0009507(chloroplast);GO:0009534(chloroplast thylakoid);GO:0009570(chloroplast stroma);GO:0009579(thylakoid);GO:0009735(response to cytokinin);GO:0009941(chloroplast envelope);GO:0010287(plastoglobule);GO:0019843(rRNA binding);GO:0032544(plastid transla…	NA	NA	NA	PREDICTED: chloroplast stem-loop binding protein of 41 kDa a, chloroplastic-like [Pyrus x bretschneideri]	2.42501	7.25207	2.99053	1.5804	0.011808	0.120163
D8674_021723	gnl|WGS:SMOL|Pdr3g005230.1	GO:0005515(protein binding);GO:0005739(mitochondrion);GO:0009507(chloroplast);GO:0009522(photosystem I);GO:0009535(chloroplast thylakoid membrane);GO:0009579(thylakoid);GO:0009767(photosynthetic electron transport chain);GO:0009768(photosynthesis, light harvesting in photosystem I);GO:0016021(integral component of membrane)	00195(Photosynthesis)	K14332	NA	PREDICTED: photosystem I subunit O-like isoform X1 [Pyrus x bretschneideri]	9.63524	28.169	2.92354	1.54771	0.0118462	0.120422
D8674_030335	gnl|WGS:SMOL|Pdr7g002590.1	GO:0004843(thiol-dependent ubiquitin-specific protease activity);GO:0005515(protein binding);GO:0005634(nucleus);GO:0005737(cytoplasm);GO:0005829(cytosol);GO:0006511(ubiquitin-dependent protein catabolic process);GO:0009506(plasmodesma);GO:0009867(jasmonic acid mediated signaling pathway);GO:0016579(protein deubiquitination);GO:0036459(thiol-dependent ubiquitinyl hydrolase activity)	NA	NA	NA	hypothetical protein DVH24_015840 [Malus domestica]	10.7289	31.0935	2.8981	1.53511	0.0119715	0.121238
D8674_002167	gnl|WGS:SMOL|Pdr10g003210.1	GO:0005515(protein binding);GO:0005634(nucleus);GO:0005794(Golgi apparatus);GO:0005886(plasma membrane);GO:0006351(transcription, DNA-templated);GO:0009416(response to light stimulus);GO:0009718(anthocyanin-containing compound biosynthetic process);GO:0015995(chlorophyll biosynthetic process);GO:0045893(positive regulation of transcription, DNA-templated)	NA	NA	NA	PREDICTED: uncharacterized protein LOC103446447 [Malus domestica]	5.05782	14.686	2.90362	1.53785	0.0120347	0.12161
D8674_029940	gnl|WGS:SMOL|Pdr6g017480.1	GO:0003677(DNA binding);GO:0003700(DNA binding transcription factor activity);GO:0005515(protein binding);GO:0005634(nucleus);GO:0006351(transcription, DNA-templated);GO:0006355(regulation of transcription, DNA-templated);GO:0009414(response to water deprivation);GO:0009651(response to salt stress);GO:0009738(abscisic acid-activated signaling pathway);GO:0009739(response to gibberellin);GO:000975…	NA	NA	NA	PREDICTED: transcription factor DIVARICATA-like [Pyrus x bretschneideri]	13.2313	38.3815	2.90081	1.53645	0.0120405	0.12161
D8674_013228	gnl|WGS:SMOL|Pdr15g005200.1	GO:0003723(RNA binding);GO:0003729(mRNA binding);GO:0005515(protein binding);GO:0005634(nucleus);GO:0005737(cytoplasm);GO:0005829(cytosol);GO:0006952(defense response);GO:0008219(cell death);GO:0009693(ethylene biosynthetic process);GO:0009738(abscisic acid-activated signaling pathway);GO:0010150(leaf senescence);GO:0017091(AU-rich element binding);GO:0048255(mRNA stabilization)	03040(Spliceosome)	K12741	NA	PREDICTED: UBP1-associated protein 2A [Pyrus x bretschneideri]	150.739	435.332	2.88798	1.53006	0.012057	0.121647
D8674_015032	gnl|WGS:SMOL|Pdr15g023240.1	NA	NA	NA	NA	hypothetical protein DVH24_012213 [Malus domestica]	14.2355	41.1239	2.88883	1.53048	0.0120645	0.121657
D8674_009450	gnl|WGS:SMOL|Pdr13g001300.1	GO:0004820(glycine-tRNA ligase activity);GO:0005737(cytoplasm);GO:0006426(glycyl-tRNA aminoacylation)	00970(Aminoacyl-tRNA biosynthesis)	K01880	EC:6.1.1.14	PREDICTED: glycine--tRNA ligase, mitochondrial 1-like [Pyrus x bretschneideri]	94.279	272.242	2.88762	1.52988	0.0120751	0.121672
D8674_005312	gnl|WGS:SMOL|Pdr11g005730.1	GO:0005840(ribosome);GO:0006479(protein methylation);GO:0008276(protein methyltransferase activity)	NA	NA	NA	PREDICTED: uncharacterized protein LOC103932762 [Pyrus x bretschneideri]	0.943122	2.93237	3.10922	1.63655	0.0120804	0.121672
D8674_021884	gnl|WGS:SMOL|Pdr3g006840.1	GO:0003674(molecular_function);GO:0005886(plasma membrane);GO:0009506(plasmodesma);GO:0016021(integral component of membrane);GO:0042742(defense response to bacterium)	NA	NA	NA	PREDICTED: protein YLS9-like [Pyrus x bretschneideri]	29.3982	84.9833	2.89077	1.53145	0.0121177	0.121799
D8674_007648	gnl|WGS:SMOL|Pdr12g003560.1	GO:0003993(acid phosphatase activity);GO:0009507(chloroplast);GO:0009534(chloroplast thylakoid);GO:0009535(chloroplast thylakoid membrane);GO:0009543(chloroplast thylakoid lumen);GO:0009579(thylakoid);GO:0010206(photosystem II repair);GO:0016021(integral component of membrane);GO:0016311(dephosphorylation);GO:0031977(thylakoid lumen)	NA	NA	NA	PREDICTED: UPF0603 protein At1g54780, chloroplastic-like [Pyrus x bretschneideri]	6.034	17.7196	2.93663	1.55416	0.0121302	0.121799
D8674_014399	gnl|WGS:SMOL|Pdr15g016910.1	GO:0003677(DNA binding);GO:0003700(DNA binding transcription factor activity);GO:0003713(transcription coactivator activity);GO:0005622(intracellular);GO:0005634(nucleus);GO:0005730(nucleolus);GO:0005737(cytoplasm);GO:0006351(transcription, DNA-templated);GO:0009408(response to heat);GO:0009414(response to water deprivation);GO:0009723(response to ethylene);GO:0009737(response to abscisic acid);G…	NA	NA	NA	hypothetical protein DVH24_029286 [Malus domestica]	1.91493	5.79077	3.02401	1.59646	0.0121741	0.122045
D8674_000245	gnl|WGS:SMOL|Pdr1g002450.1	GO:0003723(RNA binding);GO:0003729(mRNA binding);GO:0005515(protein binding);GO:0005634(nucleus);GO:0005737(cytoplasm);GO:0005829(cytosol);GO:0006952(defense response);GO:0008219(cell death);GO:0009693(ethylene biosynthetic process);GO:0009738(abscisic acid-activated signaling pathway);GO:0010150(leaf senescence);GO:0017091(AU-rich element binding);GO:0048255(mRNA stabilization)	03040(Spliceosome)	K12741	NA	hypothetical protein DVH24_034005 [Malus domestica]	44.5303	128.405	2.88354	1.52784	0.0121875	0.122068
D8674_016295	gnl|WGS:SMOL|Pdr16g007000.1	GO:0005737(cytoplasm);GO:0006952(defense response);GO:0009506(plasmodesma);GO:0009507(chloroplast)	NA	NA	NA	PREDICTED: TMV resistance protein N-like [Malus domestica]	16.8916	48.6836	2.88212	1.52713	0.0122536	0.122517
D8674_036514	gnl|WGS:SMOL|Pdr0g000290.1	GO:0004497(monooxygenase activity);GO:0044550(secondary metabolite biosynthetic process)	00906(Carotenoid biosynthesis)	K09838	EC:1.14.15.21	PREDICTED: uncharacterized protein LOC103946619 [Pyrus x bretschneideri]	5.24331	15.2638	2.91109	1.54156	0.0123271	0.122878
D8674_032807	gnl|WGS:SMOL|Pdr8g003530.1	GO:0004407(histone deacetylase activity);GO:0005634(nucleus);GO:0006351(transcription, DNA-templated);GO:0006355(regulation of transcription, DNA-templated);GO:0016575(histone deacetylation);GO:0032041(NAD-dependent histone deacetylase activity (H3-K14 specific))	NA	NA	NA	PREDICTED: histone deacetylase 2 isoform X1 [Pyrus x bretschneideri]	25.5726	73.6893	2.88158	1.52686	0.0123462	0.122958
D8674_039349	gnl|WGS:SMOL|Pdr0g028640.1	GO:0003723(RNA binding);GO:0004519(endonuclease activity);GO:0005739(mitochondrion);GO:0008270(zinc ion binding);GO:0009451(RNA modification);GO:0043231(intracellular membrane-bounded organelle)	03440(Homologous recombination)	K10683	NA	PREDICTED: pentatricopeptide repeat-containing protein At4g32450, mitochondrial-like [Pyrus x bretschneideri]	2.79527	8.16774	2.92198	1.54695	0.0123499	0.122958
D8674_035665	gnl|WGS:SMOL|Pdr9g011240.1	GO:0005575(cellular_component)	NA	NA	NA	hypothetical protein DVH24_032608 [Malus domestica]	1.73393	5.31262	3.06392	1.61538	0.0123708	0.122971
D8674_007051	gnl|WGS:SMOL|Pdr11g023120.1	GO:0005758(mitochondrial intermembrane space);GO:1990050(phosphatidic acid transporter activity)	NA	NA	NA	PREDICTED: AP2-like ethylene-responsive transcription factor PLT2 isoform X2 [Pyrus x bretschneideri]	5.37017	15.7009	2.92374	1.54781	0.0123963	0.12316
D8674_034048	gnl|WGS:SMOL|Pdr8g015940.1	NA	NA	NA	NA	-	6.40232	19.4221	3.03361	1.60103	0.0124317	0.123317
D8674_021800	gnl|WGS:SMOL|Pdr3g006000.1	GO:0000775(chromosome, centromeric region);GO:0000777(condensed chromosome kinetochore);GO:0000785(chromatin);GO:0000786(nucleosome);GO:0003677(DNA binding);GO:0005515(protein binding);GO:0005634(nucleus);GO:0006334(nucleosome assembly);GO:0009567(double fertilization forming a zygote and endosperm);GO:0031492(nucleosomal DNA binding);GO:0034508(centromere complex assembly);GO:0046982(protein het…	NA	NA	NA	PREDICTED: histone H3-like centromeric protein cnp1 isoform X1 [Pyrus x bretschneideri]	7.30784	21.1752	2.8976	1.53486	0.0125007	0.123936
D8674_031082	gnl|WGS:SMOL|Pdr7g010060.1	GO:0003674(molecular_function);GO:0005634(nucleus);GO:0008150(biological_process)	NA	NA	NA	PREDICTED: F-box protein At4g00755 [Pyrus x bretschneideri]	42.8459	123.045	2.8718	1.52195	0.0125075	0.123939
D8674_024840	gnl|WGS:SMOL|Pdr4g014130.1	GO:0002238(response to molecule of fungal origin);GO:0003674(molecular_function);GO:0007568(aging);GO:0009620(response to fungus);GO:0009624(response to nematode);GO:0010150(leaf senescence);GO:0010193(response to ozone)	00510(N-Glycan biosynthesis);04141(Protein processing in endoplasmic reticulum)	K12669	NA	PREDICTED: wound-induced protein 1-like, partial [Malus domestica]	37.2825	107.674	2.88807	1.5301	0.0125256	0.12401
D8674_034540	gnl|WGS:SMOL|Pdr8g020860.1	GO:0003723(RNA binding);GO:0004519(endonuclease activity);GO:0005739(mitochondrion);GO:0008270(zinc ion binding);GO:0009451(RNA modification);GO:0043231(intracellular membrane-bounded organelle)	03440(Homologous recombination)	K10683	NA	PREDICTED: pentatricopeptide repeat-containing protein At4g32450, mitochondrial-like [Pyrus x bretschneideri]	4.05391	11.7354	2.89484	1.53348	0.0125349	0.124015
D8674_013359	gnl|WGS:SMOL|Pdr15g006510.1	GO:0003824(catalytic activity);GO:0005737(cytoplasm);GO:0005886(plasma membrane);GO:0007165(signal transduction);GO:0019898(extrinsic component of membrane)	NA	NA	NA	hypothetical protein DVH24_039245 [Malus domestica]	4.57548	13.2394	2.89354	1.53284	0.0125482	0.124065
D8674_037282	gnl|WGS:SMOL|Pdr0g007970.1	GO:0005634(nucleus)	NA	NA	NA	PREDICTED: translin-associated protein X [Pyrus x bretschneideri]	11.9098	34.2665	2.87717	1.52465	0.0125547	0.124065
D8674_011208	gnl|WGS:SMOL|Pdr14g004450.1	GO:0004842(ubiquitin-protein transferase activity);GO:0031463(Cul3-RING ubiquitin ligase complex)	NA	NA	NA	PREDICTED: F-box/kelch-repeat protein At2g44130-like [Pyrus x bretschneideri]	9.496	27.3894	2.88431	1.52823	0.0125597	0.124065
D8674_006758	gnl|WGS:SMOL|Pdr11g020190.1	GO:0003676(nucleic acid binding);GO:0003723(RNA binding);GO:0005681(spliceosomal complex);GO:0006397(mRNA processing);GO:0008380(RNA splicing);GO:0009644(response to high light intensity);GO:0016021(integral component of membrane);GO:0016607(nuclear speck);GO:0043484(regulation of RNA splicing)	03040(Spliceosome)	K12897	NA	PREDICTED: serine/arginine-rich splicing factor SR45a-like isoform X1 [Pyrus x bretschneideri]	109.55	314.049	2.86672	1.5194	0.0125974	0.124372
D8674_004757	gnl|WGS:SMOL|Pdr11g000180.1	GO:0004650(polygalacturonase activity);GO:0005576(extracellular region);GO:0005773(vacuole);GO:0005975(carbohydrate metabolic process);GO:0009505(plant-type cell wall);GO:0016829(lyase activity);GO:0071555(cell wall organization)	00040(Pentose and glucuronate interconversions)	K01184	EC:3.2.1.15	PREDICTED: probable polygalacturonase isoform X2 [Pyrus x bretschneideri]	22.0933	63.4111	2.87015	1.52113	0.012621	0.124483
D8674_033417	gnl|WGS:SMOL|Pdr8g009630.1	GO:0003735(structural constituent of ribosome);GO:0005840(ribosome);GO:0006412(translation);GO:0009507(chloroplast);GO:0019843(rRNA binding)	NA	NA	NA	PREDICTED: 50S ribosomal protein 6, chloroplastic-like [Pyrus x bretschneideri]	5.34191	15.7198	2.94273	1.55715	0.0126297	0.124483
D8674_031557	gnl|WGS:SMOL|Pdr7g014810.1	GO:0005737(cytoplasm);GO:0031625(ubiquitin protein ligase binding);GO:0061630(ubiquitin protein ligase activity)	04141(Protein processing in endoplasmic reticulum);04120(Ubiquitin mediated proteolysis)	K10575	EC:2.3.2.23	PREDICTED: ubiquitin-conjugating enzyme E2 7-like, partial [Pyrus x bretschneideri]	9.03555	26.1281	2.8917	1.53192	0.012635	0.124483
D8674_004813	gnl|WGS:SMOL|Pdr11g000740.2	GO:0004650(polygalacturonase activity);GO:0005576(extracellular region);GO:0005634(nucleus);GO:0005975(carbohydrate metabolic process)	00040(Pentose and glucuronate interconversions)	K01184	EC:3.2.1.15	PREDICTED: probable polygalacturonase isoform X1 [Pyrus x bretschneideri]	23.3105	66.825	2.86674	1.51941	0.0126673	0.124514
D8674_016457	gnl|WGS:SMOL|Pdr16g008620.1	NA	NA	NA	NA	PREDICTED: LOW QUALITY PROTEIN: uncharacterized protein LOC103949822 [Pyrus x bretschneideri]	9.35184	26.8351	2.8695	1.5208	0.0126844	0.124562
D8674_011689	gnl|WGS:SMOL|Pdr14g009260.1	GO:0005737(cytoplasm);GO:0006221(pyrimidine nucleotide biosynthetic process);GO:0006225(UDP biosynthetic process);GO:0008652(cellular amino acid biosynthetic process);GO:0009041(uridylate kinase activity)	00240(Pyrimidine metabolism)	K09903	EC:2.7.4.22	PREDICTED: uncharacterized protein LOC103454716 [Malus domestica]	37.8895	108.489	2.86329	1.51768	0.0126925	0.124562
D8674_023291	gnl|WGS:SMOL|Pdr3g020910.1	GO:0005515(protein binding);GO:0005524(ATP binding);GO:0005576(extracellular region);GO:0006952(defense response);GO:0043531(ADP binding)	NA	NA	NA	PREDICTED: disease resistance protein RGA2-like [Pyrus x bretschneideri]	12.1676	34.8718	2.86595	1.51901	0.0126959	0.124562
D8674_042811	gnl|WGS:SMOL|Pdr0g063260.1	GO:0005737(cytoplasm);GO:0009524(phragmoplast)	NA	NA	NA	PREDICTED: MOB kinase activator-like 1A isoform X2 [Pyrus x bretschneideri]	7.86718	22.87	2.90702	1.53954	0.0128001	0.125455
D8674_014367	gnl|WGS:SMOL|Pdr15g016590.1	GO:0001046(core promoter sequence-specific DNA binding);GO:0001228(transcriptional activator activity, RNA polymerase II transcription regulatory region sequence-specific DNA binding);GO:0005634(nucleus);GO:0006366(transcription by RNA polymerase II)	NA	NA	NA	PREDICTED: transcription factor bHLH68-like [Pyrus x bretschneideri]	10.0734	28.9105	2.86997	1.52104	0.0128071	0.125458
D8674_029915	gnl|WGS:SMOL|Pdr6g017230.1	GO:0005739(mitochondrion);GO:0009507(chloroplast);GO:0009534(chloroplast thylakoid);GO:0009535(chloroplast thylakoid membrane);GO:0009579(thylakoid);GO:0009704(de-etiolation);GO:0016021(integral component of membrane);GO:0071277(cellular response to calcium ion);GO:0090333(regulation of stomatal closure)	NA	NA	NA	PREDICTED: LOW QUALITY PROTEIN: calcium sensing receptor, chloroplastic [Malus domestica]	1.24246	3.79746	3.05639	1.61183	0.0128347	0.125663
D8674_040652	gnl|WGS:SMOL|Pdr0g041670.1	GO:0000287(magnesium ion binding);GO:0004743(pyruvate kinase activity);GO:0005737(cytoplasm);GO:0005829(cytosol);GO:0006096(glycolytic process);GO:0016301(kinase activity);GO:0030955(potassium ion binding)	00010(Glycolysis / Gluconeogenesis);00620(Pyruvate metabolism);00230(Purine metabolism)	K00873	EC:2.7.1.40	PREDICTED: pyruvate kinase, cytosolic isozyme [Pyrus x bretschneideri]	38.2217	109.23	2.8578	1.51491	0.012869	0.125738
D8674_009890	gnl|WGS:SMOL|Pdr13g005700.1	GO:0005524(ATP binding);GO:0005737(cytoplasm);GO:0006457(protein folding);GO:0009408(response to heat);GO:0009644(response to high light intensity);GO:0031072(heat shock protein binding);GO:0042026(protein refolding);GO:0042542(response to hydrogen peroxide);GO:0044183(protein binding involved in protein folding)	NA	NA	NA	PREDICTED: heat shock 70 kDa protein 8-like [Pyrus x bretschneideri]	3.81484	10.979	2.87797	1.52505	0.012997	0.126857
D8674_023302	gnl|WGS:SMOL|Pdr3g021020.1	GO:0009507(chloroplast);GO:0009535(chloroplast thylakoid membrane);GO:0009817(defense response to fungus, incompatible interaction);GO:0009941(chloroplast envelope);GO:0010258(NADH dehydrogenase complex (plastoquinone) assembly);GO:0010598(NAD(P)H dehydrogenase complex (plastoquinone));GO:0016655(oxidoreductase activity, acting on NAD(P)H, quinone or similar compound as acceptor);GO:0048038(quino…	NA	NA	NA	PREDICTED: NAD(P)H-quinone oxidoreductase subunit N, chloroplastic-like [Pyrus x bretschneideri]	4.38731	12.8279	2.92387	1.54788	0.0130912	0.127578
D8674_008222	gnl|WGS:SMOL|Pdr12g009300.1	GO:0003677(DNA binding);GO:0005515(protein binding);GO:0005634(nucleus);GO:0006355(regulation of transcription, DNA-templated);GO:0016746(transferase activity, transferring acyl groups);GO:0046872(metal ion binding)	04136(Autophagy - other eukaryotes)	K08343	NA	PREDICTED: uncharacterized protein LOC103941614 [Pyrus x bretschneideri]	1.85844	5.38789	2.89914	1.53563	0.0131	0.127598
D8674_015540	gnl|WGS:SMOL|Pdr15g028320.1	GO:0016020(membrane);GO:0016709(oxidoreductase activity, acting on paired donors, with incorporation or reduction of molecular oxygen, NAD(P)H as one donor, and incorporation of one atom of oxygen);GO:0044550(secondary metabolite biosynthetic process)	NA	NA	NA	PREDICTED: cytochrome P450 CYP82D47-like [Pyrus x bretschneideri]	16.6743	47.5837	2.85371	1.51284	0.0131076	0.127606
D8674_029275	gnl|WGS:SMOL|Pdr6g010830.1	GO:0003674(molecular_function);GO:0005739(mitochondrion);GO:0009061(anaerobic respiration)	NA	NA	NA	PREDICTED: uncharacterized protein LOC103950727 [Pyrus x bretschneideri]	45.6744	130.355	2.85402	1.51299	0.0131209	0.127638
D8674_026409	gnl|WGS:SMOL|Pdr5g008850.1	GO:0004144(diacylglycerol O-acyltransferase activity);GO:0005886(plasma membrane);GO:0019432(triglyceride biosynthetic process);GO:0047196(long-chain-alcohol O-fatty-acyltransferase activity)	00073(Cutin, suberine and wax biosynthesis)	K15406	EC:2.3.1.75;EC:2.3.1.20	PREDICTED: O-acyltransferase WSD1-like [Pyrus x bretschneideri]	55.0028	156.593	2.84701	1.50945	0.0131244	0.127638
D8674_006584	gnl|WGS:SMOL|Pdr11g018450.1	GO:0005634(nucleus)	NA	NA	NA	PREDICTED: ACT domain-containing protein ACR9-like isoform X3 [Pyrus x bretschneideri]	8.86177	25.3086	2.85593	1.51396	0.0132629	0.128433
D8674_009606	gnl|WGS:SMOL|Pdr13g002860.1	GO:0004568(chitinase activity);GO:0005576(extracellular region);GO:0005794(Golgi apparatus);GO:0006032(chitin catabolic process);GO:0009408(response to heat);GO:0009414(response to water deprivation);GO:0009651(response to salt stress);GO:0009735(response to cytokinin);GO:0009809(lignin biosynthetic process);GO:0009825(multidimensional cell growth);GO:0009873(ethylene-activated signaling pathway)…	00520(Amino sugar and nucleotide sugar metabolism);04016(MAPK signaling pathway - plant)	K20547	EC:3.2.1.14	PREDICTED: chitinase-like protein 2 [Pyrus x bretschneideri]	2.04069	5.97876	2.92978	1.55079	0.0132773	0.128463
D8674_036016	gnl|WGS:SMOL|Pdr9g014750.1	GO:0003674(molecular_function);GO:0005739(mitochondrion);GO:0009507(chloroplast);GO:0009534(chloroplast thylakoid);GO:0009535(chloroplast thylakoid membrane);GO:0009941(chloroplast envelope);GO:0016020(membrane)	NA	NA	NA	PREDICTED: uncharacterized protein LOC103947806 isoform X1 [Pyrus x bretschneideri]	13.4392	38.3462	2.85331	1.51264	0.013383	0.129188
D8674_013219	gnl|WGS:SMOL|Pdr15g005110.1	GO:0009507(chloroplast);GO:0009523(photosystem II);GO:0009535(chloroplast thylakoid membrane);GO:0009611(response to wounding);GO:0009765(photosynthesis, light harvesting);GO:0016021(integral component of membrane);GO:0016168(chlorophyll binding);GO:0071486(cellular response to high light intensity);GO:0071492(cellular response to UV-A)	NA	NA	NA	PREDICTED: stress enhanced protein 2, chloroplastic-like [Malus domestica]	24.4367	69.5337	2.84546	1.50866	0.0133864	0.129188
D8674_001585	gnl|WGS:SMOL|Pdr1g015850.1	GO:0003700(DNA binding transcription factor activity);GO:0005634(nucleus);GO:0006355(regulation of transcription, DNA-templated);GO:0043565(sequence-specific DNA binding)	NA	NA	NA	PREDICTED: scarecrow-like protein 8 [Pyrus x bretschneideri]	36.3835	103.19	2.83618	1.50395	0.013428	0.129456
D8674_029576	gnl|WGS:SMOL|Pdr6g013840.1	GO:0003674(molecular_function);GO:0005634(nucleus);GO:0008150(biological_process);GO:0031262(Ndc80 complex)	NA	NA	NA	PREDICTED: probable kinetochore protein SPC25 [Malus domestica]	14.8763	42.2761	2.84185	1.50683	0.0134717	0.129678
D8674_010022	gnl|WGS:SMOL|Pdr13g007020.1	GO:0000291(nuclear-transcribed mRNA catabolic process, exonucleolytic);GO:0000428(DNA-directed RNA polymerase complex);GO:0000932(P-body);GO:0003697(single-stranded DNA binding);GO:0003727(single-stranded RNA binding);GO:0003899(DNA-directed 5'-3' RNA polymerase activity);GO:0005665(DNA-directed RNA polymerase II, core complex);GO:0006367(transcription initiation from RNA polymerase II promoter);…	NA	NA	NA	PREDICTED: DNA-directed RNA polymerase V subunit 7-like isoform X1 [Malus domestica]	16.3077	46.4274	2.84697	1.50943	0.0135168	0.12998
D8674_028163	gnl|WGS:SMOL|Pdr5g026390.1	GO:0005737(cytoplasm);GO:0030001(metal ion transport);GO:0046914(transition metal ion binding);GO:0046916(cellular transition metal ion homeostasis)	NA	NA	NA	PREDICTED: early nodulin-75 [Pyrus x bretschneideri]	44.9438	127.347	2.83347	1.50257	0.0135836	0.130423
D8674_003354	gnl|WGS:SMOL|Pdr10g015080.1	GO:0005247(voltage-gated chloride channel activity);GO:0005794(Golgi apparatus);GO:0005886(plasma membrane);GO:0006821(chloride transport);GO:0009507(chloroplast);GO:0016020(membrane);GO:0034707(chloride channel complex);GO:0034765(regulation of ion transmembrane transport)	NA	NA	NA	PREDICTED: LOW QUALITY PROTEIN: chloride channel protein CLC-e-like [Malus domestica]	1.20224	3.50166	2.91261	1.54231	0.0135956	0.130472
D8674_031444	gnl|WGS:SMOL|Pdr7g013680.1	GO:0004842(ubiquitin-protein transferase activity);GO:0005576(extracellular region);GO:0008270(zinc ion binding)	00563(Glycosylphosphatidylinositol(GPI)-anchor biosynthesis)	K03857	EC:2.4.1.198	PREDICTED: uncharacterized protein LOC103410572 [Malus domestica]	1.2392	3.58728	2.89484	1.53349	0.0136742	0.131069
D8674_019717	gnl|WGS:SMOL|Pdr17g016470.1	GO:0003677(DNA binding);GO:0003906(DNA-(apurinic or apyrimidinic site) lyase activity);GO:0005634(nucleus);GO:0006284(base-excision repair);GO:0006306(DNA methylation);GO:0006349(regulation of gene expression by genetic imprinting);GO:0006351(transcription, DNA-templated);GO:0006355(regulation of transcription, DNA-templated);GO:0009793(embryo development ending in seed dormancy);GO:0019104(DNA N…	NA	NA	NA	PREDICTED: LOW QUALITY PROTEIN: transcriptional activator DEMETER-like [Pyrus x bretschneideri]	1.81445	5.15805	2.84276	1.50729	0.013769	0.131801
D8674_002634	gnl|WGS:SMOL|Pdr10g007880.1	GO:0003674(molecular_function);GO:0009507(chloroplast);GO:0009534(chloroplast thylakoid);GO:0009535(chloroplast thylakoid membrane);GO:0009538(photosystem I reaction center);GO:0009579(thylakoid);GO:0009941(chloroplast envelope);GO:0010287(plastoglobule);GO:0015979(photosynthesis);GO:0016020(membrane);GO:0016021(integral component of membrane)	00195(Photosynthesis)	K02694	NA	PREDICTED: photosystem I reaction center subunit III, chloroplastic [Pyrus x bretschneideri]	21.4772	60.7479	2.82848	1.50003	0.0137791	0.131831
D8674_006978	gnl|WGS:SMOL|Pdr11g022390.1	GO:0009507(chloroplast);GO:0009522(photosystem I);GO:0009534(chloroplast thylakoid);GO:0009535(chloroplast thylakoid membrane);GO:0009579(thylakoid);GO:0009773(photosynthetic electron transport in photosystem I);GO:0009780(photosynthetic NADP+ reduction);GO:0009941(chloroplast envelope);GO:0015979(photosynthesis);GO:0016020(membrane);GO:0016021(integral component of membrane);GO:0016168(chlorophy…	00195(Photosynthesis)	K08905	NA	PREDICTED: photosystem I reaction center subunit V, chloroplastic-like [Pyrus x bretschneideri]	19.7951	55.9933	2.82865	1.50011	0.0138551	0.132491
D8674_030107	gnl|WGS:SMOL|Pdr7g000310.1	GO:0005634(nucleus)	04141(Protein processing in endoplasmic reticulum)	K10666	EC:2.3.2.27	PREDICTED: uncharacterized protein LOC103945819 [Pyrus x bretschneideri]	3.37801	9.64411	2.85496	1.51347	0.0138644	0.132513
D8674_016256	gnl|WGS:SMOL|Pdr16g006610.1	GO:0005524(ATP binding);GO:0005886(plasma membrane);GO:0016021(integral component of membrane);GO:0016301(kinase activity);GO:0016310(phosphorylation)	NA	NA	NA	hypothetical protein DVH24_040746 [Malus domestica]	408.917	1152.26	2.81783	1.49458	0.0138797	0.13253
D8674_007463	gnl|WGS:SMOL|Pdr12g001710.1	GO:0003674(molecular_function);GO:0005634(nucleus);GO:0009793(embryo development ending in seed dormancy)	NA	NA	NA	PREDICTED: LOW QUALITY PROTEIN: F-box protein PP2-B10-like [Malus domestica]	14.1657	40.1328	2.83311	1.50238	0.0138919	0.13253
D8674_030469	gnl|WGS:SMOL|Pdr7g003930.1	GO:0003755(peptidyl-prolyl cis-trans isomerase activity)	NA	NA	NA	PREDICTED: peptidyl-prolyl cis-trans isomerase CYP40-like [Pyrus x bretschneideri]	1.37559	4.16166	3.02536	1.59711	0.0138986	0.13253
D8674_015393	gnl|WGS:SMOL|Pdr15g026850.1	GO:0005739(mitochondrion);GO:0016021(integral component of membrane);GO:0030246(carbohydrate binding)	NA	NA	NA	PREDICTED: protein PHLOEM PROTEIN 2-LIKE A10 [Pyrus x bretschneideri]	5.49523	15.624	2.84319	1.50751	0.0139014	0.13253
D8674_025787	gnl|WGS:SMOL|Pdr5g002630.1	GO:0003723(RNA binding);GO:0005739(mitochondrion);GO:0008150(biological_process)	NA	NA	NA	PREDICTED: pentatricopeptide repeat-containing protein At1g77360, mitochondrial-like [Pyrus x bretschneideri]	1.89878	5.46988	2.88073	1.52644	0.013916	0.132602
D8674_028162	gnl|WGS:SMOL|Pdr5g026380.1	GO:0005737(cytoplasm);GO:0030001(metal ion transport);GO:0046914(transition metal ion binding);GO:0046916(cellular transition metal ion homeostasis)	NA	NA	NA	protein PYRICULARIA ORYZAE RESISTANCE 21-like [Rosa chinensis]	19.4351	55.2172	2.84111	1.50646	0.0139624	0.13291
D8674_015681	gnl|WGS:SMOL|Pdr16g000860.1	GO:0005929(cilium);GO:0030991(intraciliary transport particle A);GO:0035721(intraciliary retrograde transport);GO:0060271(cilium assembly);GO:0061512(protein localization to cilium)	NA	NA	NA	hypothetical protein DVH24_040183 [Malus domestica]	78.2144	220.138	2.81454	1.4929	0.0140035	0.133234
D8674_031651	gnl|WGS:SMOL|Pdr7g015750.1	GO:0003674(molecular_function);GO:0005575(cellular_component);GO:0008150(biological_process)	NA	NA	NA	PREDICTED: homeobox protein OTX1-like [Malus domestica]	2.1995	6.32423	2.8753	1.52371	0.014021	0.133267
D8674_011898	gnl|WGS:SMOL|Pdr14g011350.1	GO:0003674(molecular_function);GO:0005634(nucleus);GO:0008150(biological_process)	NA	NA	NA	hypothetical protein DVH24_040105 [Malus domestica]	4.81039	13.7473	2.85784	1.51492	0.014052	0.133482
D8674_019937	gnl|WGS:SMOL|Pdr17g018670.1	NA	NA	NA	NA	-	10.9677	31.5752	2.87893	1.52553	0.0140578	0.133482
D8674_036398	gnl|WGS:SMOL|Pdr9g018570.1	GO:0004017(adenylate kinase activity);GO:0005524(ATP binding);GO:0005739(mitochondrion);GO:0046939(nucleotide phosphorylation)	00230(Purine metabolism);00730(Thiamine metabolism)	K00939	EC:2.7.4.3	hypothetical protein DVH24_037385 [Malus domestica]	2.8279	8.26652	2.9232	1.54755	0.0140701	0.133531
D8674_016569	gnl|WGS:SMOL|Pdr16g009740.1	GO:0016020(membrane);GO:0016709(oxidoreductase activity, acting on paired donors, with incorporation or reduction of molecular oxygen, NAD(P)H as one donor, and incorporation of one atom of oxygen);GO:0044550(secondary metabolite biosynthetic process)	NA	NA	NA	PREDICTED: geraniol 8-hydroxylase-like [Pyrus x bretschneideri]	9.65101	27.4297	2.84215	1.50698	0.0141116	0.133598
D8674_017074	gnl|WGS:SMOL|Pdr16g014790.1	GO:0005515(protein binding);GO:0005634(nucleus);GO:0009908(flower development);GO:0030154(cell differentiation)	NA	NA	NA	PREDICTED: FRIGIDA-like protein 4a [Pyrus x bretschneideri]	157.2	441.725	2.80997	1.49055	0.0141125	0.133598
D8674_010988	gnl|WGS:SMOL|Pdr14g002250.1	GO:0003674(molecular_function);GO:0005634(nucleus);GO:0008150(biological_process)	NA	NA	NA	PREDICTED: F-box/LRR-repeat protein At4g14103-like [Pyrus x bretschneideri]	0.599697	1.78644	2.97891	1.57479	0.0141272	0.13367
D8674_013646	gnl|WGS:SMOL|Pdr15g009380.1	GO:0016020(membrane);GO:0016709(oxidoreductase activity, acting on paired donors, with incorporation or reduction of molecular oxygen, NAD(P)H as one donor, and incorporation of one atom of oxygen);GO:0042343(indole glucosinolate metabolic process);GO:0044550(secondary metabolite biosynthetic process);GO:0098542(defense response to other organism)	00943(Isoflavonoid biosynthesis)	K13260	EC:1.14.13.89;EC:1.14.13.53	PREDICTED: cytochrome P450 81E8-like [Pyrus x bretschneideri]	6.17359	17.4849	2.83221	1.50193	0.0141418	0.133674
D8674_001295	gnl|WGS:SMOL|Pdr1g012950.1	GO:0005515(protein binding);GO:0005634(nucleus);GO:0005737(cytoplasm);GO:0006351(transcription, DNA-templated);GO:0006355(regulation of transcription, DNA-templated);GO:0019538(protein metabolic process)	NA	NA	NA	PREDICTED: protein SMAX1-LIKE 7-like [Pyrus x bretschneideri]	122.632	344.184	2.80663	1.48884	0.0142077	0.134102
D8674_040834	gnl|WGS:SMOL|Pdr0g043490.1	GO:0003674(molecular_function);GO:0005737(cytoplasm);GO:0008150(biological_process)	NA	NA	NA	PREDICTED: LOW QUALITY PROTEIN: ganglioside-induced differentiation-associated-protein 2 [Pyrus x bretschneideri]	4.44224	12.8581	2.89451	1.53332	0.0142173	0.134119
D8674_035629	gnl|WGS:SMOL|Pdr9g010880.1	GO:0003868(4-hydroxyphenylpyruvate dioxygenase activity);GO:0006559(L-phenylalanine catabolic process);GO:0006572(tyrosine catabolic process)	00350(Tyrosine metabolism);00360(Phenylalanine metabolism);00130(Ubiquinone and other terpenoid-quinone biosynthesis)	K00457	EC:1.13.11.27	PREDICTED: LOW QUALITY PROTEIN: 4-hydroxyphenylpyruvate dioxygenase [Malus domestica]	27.6054	77.501	2.80746	1.48926	0.0143018	0.134714
D8674_030111	gnl|WGS:SMOL|Pdr7g000350.1	GO:0003677(DNA binding);GO:0005634(nucleus)	NA	NA	NA	PREDICTED: uncharacterized protein LOC103945928 [Pyrus x bretschneideri]	1.21084	3.4906	2.88279	1.52746	0.0144157	0.135584
D8674_014288	gnl|WGS:SMOL|Pdr15g015800.1	GO:0003676(nucleic acid binding);GO:0003677(DNA binding);GO:0003700(DNA binding transcription factor activity);GO:0005634(nucleus);GO:0005886(plasma membrane);GO:0006355(regulation of transcription, DNA-templated);GO:0006979(response to oxidative stress);GO:0046872(metal ion binding)	NA	NA	NA	PREDICTED: zinc finger CCCH domain-containing protein 20-like [Pyrus x bretschneideri]	2.68095	7.63713	2.84866	1.51028	0.0144428	0.135771
D8674_018135	gnl|WGS:SMOL|Pdr17g000650.1	GO:0000981(RNA polymerase II transcription factor activity, sequence-specific DNA binding);GO:0003677(DNA binding);GO:0003700(DNA binding transcription factor activity);GO:0005515(protein binding);GO:0005634(nucleus);GO:0006351(transcription, DNA-templated);GO:0006355(regulation of transcription, DNA-templated);GO:0042802(identical protein binding);GO:0043565(sequence-specific DNA binding)	NA	NA	NA	PREDICTED: trihelix transcription factor GT-4-like [Pyrus x bretschneideri]	24.4431	68.5145	2.80302	1.48698	0.0145033	0.136184
D8674_018535	gnl|WGS:SMOL|Pdr17g004650.1	GO:0004674(protein serine/threonine kinase activity);GO:0004675(transmembrane receptor protein serine/threonine kinase activity);GO:0005524(ATP binding);GO:0005886(plasma membrane);GO:0006468(protein phosphorylation);GO:0007166(cell surface receptor signaling pathway);GO:0007169(transmembrane receptor protein tyrosine kinase signaling pathway);GO:0007623(circadian rhythm);GO:0016021(integral comp…	NA	NA	NA	PREDICTED: protein STRUBBELIG-RECEPTOR FAMILY 3-like isoform X1 [Pyrus x bretschneideri]	19.7163	55.1759	2.79849	1.48465	0.0145083	0.136184
D8674_014892	gnl|WGS:SMOL|Pdr15g021840.1	GO:0005737(cytoplasm);GO:0008150(biological_process)	NA	NA	NA	PREDICTED: neurochondrin [Pyrus x bretschneideri]	4.01823	11.3162	2.81621	1.49376	0.0147547	0.138084
D8674_006703	gnl|WGS:SMOL|Pdr11g019640.1	GO:0016020(membrane);GO:0016709(oxidoreductase activity, acting on paired donors, with incorporation or reduction of molecular oxygen, NAD(P)H as one donor, and incorporation of one atom of oxygen);GO:0044550(secondary metabolite biosynthetic process)	NA	NA	NA	PREDICTED: cytochrome P450 71A26-like [Malus domestica]	4.81034	13.5596	2.81884	1.4951	0.0147875	0.138322
D8674_039011	gnl|WGS:SMOL|Pdr0g025260.1	NA	NA	NA	NA	hypothetical protein DVH24_038127 [Malus domestica]	2.92569	8.28845	2.83299	1.50233	0.0148074	0.138372
D8674_038802	gnl|WGS:SMOL|Pdr0g023170.1	GO:0005634(nucleus)	NA	NA	NA	PREDICTED: F-box/FBD/LRR-repeat protein At4g26340-like [Pyrus x bretschneideri]	0.506909	1.52038	2.99931	1.58463	0.0148543	0.138672
D8674_004545	gnl|WGS:SMOL|Pdr10g026990.1	GO:0003700(DNA binding transcription factor activity);GO:0005634(nucleus);GO:0006355(regulation of transcription, DNA-templated);GO:0010192(mucilage biosynthetic process);GO:0019760(glucosinolate metabolic process);GO:0043565(sequence-specific DNA binding);GO:0044212(transcription regulatory region DNA binding)	00040(Pentose and glucuronate interconversions)	K01051	EC:3.1.1.11	PREDICTED: trihelix transcription factor GT-2-like [Pyrus x bretschneideri]	23.7646	66.2415	2.7874	1.47892	0.0148749	0.138796
D8674_016917	gnl|WGS:SMOL|Pdr16g013220.1	GO:0003954(NADH dehydrogenase activity);GO:0005634(nucleus);GO:0005886(plasma membrane);GO:0016021(integral component of membrane);GO:0051536(iron-sulfur cluster binding)	NA	NA	NA	PREDICTED: CASP-like protein 1D1 isoform X1 [Pyrus x bretschneideri]	563.708	1568.26	2.78204	1.47615	0.0149413	0.139278
D8674_017305	gnl|WGS:SMOL|Pdr16g017100.1	GO:0000386(second spliceosomal transesterification activity);GO:0005681(spliceosomal complex)	03040(Spliceosome)	K12819	NA	PREDICTED: pre-mRNA-splicing factor SLU7-like isoform X1 [Pyrus x bretschneideri]	3.76553	10.5625	2.80505	1.48803	0.0149865	0.139492
D8674_005765	gnl|WGS:SMOL|Pdr11g010260.1	GO:0004721(phosphoprotein phosphatase activity);GO:0004722(protein serine/threonine phosphatase activity);GO:0005634(nucleus);GO:0005829(cytosol);GO:0006470(protein dephosphorylation);GO:0009532(plastid stroma);GO:0046872(metal ion binding)	NA	NA	NA	PREDICTED: serine/threonine-protein phosphatase PP-X isozyme 2 [Malus domestica]	32.4362	90.2489	2.78235	1.4763	0.0150011	0.139559
D8674_011807	gnl|WGS:SMOL|Pdr14g010440.1	GO:0003921(GMP synthase activity);GO:0003922(GMP synthase (glutamine-hydrolyzing) activity);GO:0005829(cytosol);GO:0006177(GMP biosynthetic process)	00230(Purine metabolism)	K01951	EC:6.3.5.2	PREDICTED: uncharacterized protein LOC103954826 [Pyrus x bretschneideri]	3.58349	10.0783	2.81244	1.49182	0.0150239	0.139626
D8674_022933	gnl|WGS:SMOL|Pdr3g017330.1	GO:0005739(mitochondrion)	00010(Glycolysis / Gluconeogenesis);00030(Pentose phosphate pathway);00051(Fructose and mannose metabolism);00710(Carbon fixation in photosynthetic organisms)	K01623	EC:4.1.2.13	PREDICTED: uncharacterized protein LOC103967147 [Pyrus x bretschneideri]	3.94805	11.1881	2.83384	1.50276	0.0150767	0.13992
D8674_007365	gnl|WGS:SMOL|Pdr12g000730.1	GO:0005737(cytoplasm);GO:0005829(cytosol);GO:0016491(oxidoreductase activity);GO:0046686(response to cadmium ion);GO:0055114(oxidation-reduction process)	00053(Ascorbate and aldarate metabolism)	K17744	EC:1.1.1.316	PREDICTED: perakine reductase-like isoform X1 [Pyrus x bretschneideri]	8.96682	25.0696	2.79581	1.48327	0.0151102	0.140159
D8674_039865	gnl|WGS:SMOL|Pdr0g033800.1	GO:0008150(biological_process);GO:0008483(transaminase activity);GO:0009507(chloroplast)	NA	NA	NA	PREDICTED: UV-B-induced protein At3g17800, chloroplastic [Pyrus x bretschneideri]	46.8289	130.085	2.77788	1.47399	0.0151426	0.140322
D8674_041248	gnl|WGS:SMOL|Pdr0g047630.1	GO:0003674(molecular_function);GO:0008150(biological_process);GO:0009507(chloroplast);GO:0009535(chloroplast thylakoid membrane);GO:0009570(chloroplast stroma)	NA	NA	NA	PREDICTED: uncharacterized protein LOC103961669 [Pyrus x bretschneideri]	2.69226	7.81346	2.9022	1.53714	0.0151825	0.140485
D8674_015484	gnl|WGS:SMOL|Pdr15g027760.1	GO:0008150(biological_process);GO:0009507(chloroplast);GO:0009535(chloroplast thylakoid membrane);GO:0009579(thylakoid)	NA	NA	NA	PREDICTED: uncharacterized protein LOC103954736 isoform X1 [Pyrus x bretschneideri]	1.8432	5.38892	2.92367	1.54778	0.0152358	0.140909
D8674_022352	gnl|WGS:SMOL|Pdr3g011520.1	GO:0008422(beta-glucosidase activity);GO:1901657(glycosyl compound metabolic process)	00500(Starch and sucrose metabolism);00460(Cyanoamino acid metabolism);00940(Phenylpropanoid biosynthesis)	K01188	EC:3.2.1.21	PREDICTED: putative beta-glucosidase 41 isoform X1 [Malus domestica]	2.19118	6.18458	2.82249	1.49697	0.0152433	0.140909
D8674_001299	gnl|WGS:SMOL|Pdr1g012990.1	GO:0004435(phosphatidylinositol phospholipase C activity);GO:0004629(phospholipase C activity);GO:0005515(protein binding);GO:0005886(plasma membrane);GO:0007165(signal transduction);GO:0009553(embryo sac development);GO:0009556(microsporogenesis);GO:0010601(positive regulation of auxin biosynthetic process);GO:0016042(lipid catabolic process);GO:0035556(intracellular signal transduction);GO:0042…	00562(Inositol phosphate metabolism);04070(Phosphatidylinositol signaling system);04933(AGE-RAGE signaling pathway in diabetic complications)	K05857	EC:3.1.4.11	PREDICTED: phosphoinositide phospholipase C 2-like [Pyrus x bretschneideri]	41.1124	113.969	2.77213	1.47099	0.015296	0.141258
D8674_029475	gnl|WGS:SMOL|Pdr6g012830.1	GO:0000123(histone acetyltransferase complex);GO:0002098(tRNA wobble uridine modification);GO:0004402(histone acetyltransferase activity);GO:0005737(cytoplasm);GO:0006357(regulation of transcription by RNA polymerase II);GO:0006368(transcription elongation from RNA polymerase II promoter);GO:0008023(transcription elongation factor complex);GO:0033588(Elongator holoenzyme complex)	NA	NA	NA	PREDICTED: elongator complex protein 3 [Pyrus x bretschneideri]	1.8921	5.35904	2.83233	1.50199	0.0154003	0.141852
D8674_031723	gnl|WGS:SMOL|Pdr7g016470.1	GO:0000139(Golgi membrane);GO:0005739(mitochondrion);GO:0005768(endosome);GO:0005794(Golgi apparatus);GO:0005802(trans-Golgi network);GO:0006486(protein glycosylation);GO:0006665(sphingolipid metabolic process);GO:0007155(cell adhesion);GO:0007275(multicellular organism development);GO:0008219(cell death);GO:0009737(response to abscisic acid);GO:0009738(abscisic acid-activated signaling pathway);…	NA	NA	NA	PREDICTED: glycosyltransferase family 64 protein C4 [Pyrus x bretschneideri]	38.0196	105.325	2.77028	1.47003	0.0154448	0.142145
D8674_029459	gnl|WGS:SMOL|Pdr6g012670.1	NA	NA	NA	NA	hypothetical protein DVH24_008563 [Malus domestica]	2.93894	8.78209	2.98818	1.57927	0.0154867	0.142323
D8674_041274	gnl|WGS:SMOL|Pdr0g047890.1	GO:0005739(mitochondrion);GO:0009982(pseudouridine synthase activity);GO:0019239(deaminase activity);GO:0031119(tRNA pseudouridine synthesis)	NA	NA	NA	PREDICTED: RNA pseudouridine synthase 1-like [Pyrus x bretschneideri]	2.2567	6.4103	2.84056	1.50618	0.0156182	0.142974
D8674_002529	gnl|WGS:SMOL|Pdr10g006830.1	GO:0000325(plant-type vacuole);GO:0005516(calmodulin binding);GO:0005524(ATP binding);GO:0005773(vacuole);GO:0005774(vacuolar membrane);GO:0008559(xenobiotic transmembrane transporting ATPase activity);GO:0016021(integral component of membrane);GO:0042626(ATPase activity, coupled to transmembrane movement of substances);GO:0055085(transmembrane transport);GO:1902417((+)-abscisic acid D-glucopyran…	02010(ABC transporters)	K05666	NA	PREDICTED: ABC transporter C family member 12-like [Pyrus x bretschneideri]	2.80386	7.77381	2.77254	1.47121	0.015694	0.143529
D8674_017194	gnl|WGS:SMOL|Pdr16g015990.1	GO:0003676(nucleic acid binding);GO:0003677(DNA binding);GO:0005634(nucleus);GO:0006355(regulation of transcription, DNA-templated);GO:0006368(transcription elongation from RNA polymerase II promoter);GO:0008270(zinc ion binding);GO:0016570(histone modification);GO:0016593(Cdc73/Paf1 complex);GO:0040007(growth);GO:1990269(RNA polymerase II C-terminal domain phosphoserine binding)	03010(Ribosome)	K02958	NA	PREDICTED: uncharacterized protein LOC103939431 isoform X1 [Pyrus x bretschneideri]	2.13183	5.91785	2.77595	1.47298	0.0158415	0.144457
D8674_006672	gnl|WGS:SMOL|Pdr11g019330.1	GO:0005515(protein binding);GO:0007623(circadian rhythm);GO:0009295(nucleoid);GO:0009507(chloroplast);GO:0009508(plastid chromosome);GO:0009534(chloroplast thylakoid);GO:0009535(chloroplast thylakoid membrane);GO:0009941(chloroplast envelope);GO:0016020(membrane);GO:0042644(chloroplast nucleoid);GO:0098572(stromal side of plastid thylakoid membrane)	NA	NA	NA	PREDICTED: protein plastid transcriptionally active 16, chloroplastic [Pyrus x bretschneideri]	35.7452	98.4815	2.7551	1.46211	0.0158657	0.144538
D8674_039649	gnl|WGS:SMOL|Pdr0g031640.1	GO:0005524(ATP binding);GO:0005634(nucleus);GO:0006952(defense response);GO:0043531(ADP binding)	04626(Plant-pathogen interaction)	K13457	NA	PREDICTED: probable disease resistance protein RF9 [Pyrus x bretschneideri]	8.1538	22.4873	2.75789	1.46357	0.0158989	0.144768
D8674_042104	gnl|WGS:SMOL|Pdr0g056190.1	GO:0000981(RNA polymerase II transcription factor activity, sequence-specific DNA binding);GO:0001135(transcription factor activity, RNA polymerase II transcription factor recruiting);GO:0003677(DNA binding);GO:0003700(DNA binding transcription factor activity);GO:0005634(nucleus);GO:0006351(transcription, DNA-templated);GO:0006355(regulation of transcription, DNA-templated);GO:0006357(regulation…	NA	NA	NA	PREDICTED: myb-related protein P-like [Pyrus x bretschneideri]	1.29768	3.70527	2.85529	1.51364	0.0159371	0.144978
D8674_042485	gnl|WGS:SMOL|Pdr0g060000.1	GO:0005737(cytoplasm)	04016(MAPK signaling pathway - plant)	K20716	NA	PREDICTED: mitogen-activated protein kinase kinase kinase ANP1-like [Pyrus x bretschneideri]	1.49835	4.25785	2.8417	1.50675	0.015947	0.144999
D8674_008300	gnl|WGS:SMOL|Pdr12g010080.1	GO:0000302(response to reactive oxygen species);GO:0004130(cytochrome-c peroxidase activity);GO:0005737(cytoplasm);GO:0005829(cytosol);GO:0006979(response to oxidative stress);GO:0009507(chloroplast);GO:0016688(L-ascorbate peroxidase activity);GO:0020037(heme binding);GO:0034599(cellular response to oxidative stress);GO:0042744(hydrogen peroxide catabolic process);GO:0046872(metal ion binding);GO…	00053(Ascorbate and aldarate metabolism);00480(Glutathione metabolism)	K00434	EC:1.11.1.11	PREDICTED: L-ascorbate peroxidase 2, cytosolic [Pyrus x bretschneideri]	5.57923	15.6243	2.80045	1.48566	0.015989	0.145262
D8674_034719	gnl|WGS:SMOL|Pdr9g001780.1	GO:0007165(signal transduction);GO:0016020(membrane)	NA	NA	NA	PREDICTED: uncharacterized protein LOC103947828 isoform X1 [Pyrus x bretschneideri]	61.2121	168.245	2.74855	1.45867	0.0160229	0.145339
D8674_040591	gnl|WGS:SMOL|Pdr0g041060.1	GO:0005515(protein binding);GO:0005524(ATP binding);GO:0005576(extracellular region);GO:0006952(defense response);GO:0043531(ADP binding)	NA	NA	NA	PREDICTED: putative disease resistance protein RGA3 [Pyrus x bretschneideri]	6.56643	18.22	2.77473	1.47235	0.0160466	0.145483
D8674_039116	gnl|WGS:SMOL|Pdr0g026310.1	GO:0004760(serine-pyruvate transaminase activity);GO:0005777(peroxisome);GO:0005886(plasma membrane);GO:0008453(alanine-glyoxylate transaminase activity);GO:0009507(chloroplast);GO:0009570(chloroplast stroma);GO:0009853(photorespiration);GO:0016020(membrane);GO:0019265(glycine biosynthetic process, by transamination of glyoxylate);GO:0048046(apoplast);GO:0050281(serine-glyoxylate transaminase act…	00630(Glyoxylate and dicarboxylate metabolism);00250(Alanine, aspartate and glutamate metabolism);00260(Glycine, serine and threonine metabolism);04146(Peroxisome)	K00830	EC:2.6.1.44;EC:2.6.1.45	PREDICTED: serine--glyoxylate aminotransferase [Pyrus x bretschneideri]	6.64118	18.3618	2.76483	1.46719	0.0160834	0.145717
D8674_013599	gnl|WGS:SMOL|Pdr15g008910.1	NA	NA	NA	NA	PREDICTED: uncharacterized protein LOC108866630 [Pyrus x bretschneideri]	12.83	35.6235	2.77657	1.4733	0.0161911	0.146383
D8674_002125	gnl|WGS:SMOL|Pdr10g002790.1	GO:0000785(chromatin);GO:0000976(transcription regulatory region sequence-specific DNA binding);GO:0003700(DNA binding transcription factor activity);GO:0005634(nucleus);GO:0006355(regulation of transcription, DNA-templated);GO:0031490(chromatin DNA binding);GO:0032454(histone demethylase activity (H3-K9 specific));GO:0033169(histone H3-K9 demethylation)	NA	NA	NA	PREDICTED: lysine-specific demethylase JMJ25-like isoform X1 [Pyrus x bretschneideri]	7.34734	20.171	2.74535	1.45699	0.0162993	0.147002
D8674_039712	gnl|WGS:SMOL|Pdr0g032270.1	GO:0003674(molecular_function);GO:0008150(biological_process)	NA	NA	NA	hypothetical protein DVH24_031287 [Malus domestica]	14.4861	39.9232	2.75596	1.46256	0.0163864	0.147431
D8674_040777	gnl|WGS:SMOL|Pdr0g042920.1	GO:0005634(nucleus)	NA	NA	NA	PREDICTED: uncharacterized protein LOC103441611 [Malus domestica]	4.33092	11.9297	2.75455	1.46182	0.0164205	0.147613
D8674_014344	gnl|WGS:SMOL|Pdr15g016360.1	GO:0000350(generation of catalytic spliceosome for second transesterification step);GO:0000398(mRNA splicing, via spliceosome);GO:0003712(transcription cofactor activity);GO:0005515(protein binding);GO:0005634(nucleus);GO:0005730(nucleolus);GO:0006351(transcription, DNA-templated);GO:0006357(regulation of transcription by RNA polymerase II);GO:0008380(RNA splicing);GO:0009651(response to salt str…	03040(Spliceosome)	K06063	NA	PREDICTED: SNW/SKI-interacting protein [Pyrus x bretschneideri]	243.021	664.499	2.73432	1.45118	0.0164643	0.147809
D8674_021505	gnl|WGS:SMOL|Pdr3g003050.1	GO:0000398(mRNA splicing, via spliceosome);GO:0003677(DNA binding);GO:0003723(RNA binding);GO:0005515(protein binding);GO:0005634(nucleus);GO:0005681(spliceosomal complex);GO:0016607(nuclear speck);GO:0030628(pre-mRNA 3'-splice site binding);GO:0046872(metal ion binding);GO:0048573(photoperiodism, flowering);GO:0089701(U2AF)	03040(Spliceosome)	K12836	NA	PREDICTED: splicing factor U2af small subunit B-like [Pyrus x bretschneideri]	41.6501	113.98	2.73662	1.4524	0.0164824	0.147809
D8674_018273	gnl|WGS:SMOL|Pdr17g002030.1	GO:0004252(serine-type endopeptidase activity);GO:0005515(protein binding);GO:0005634(nucleus);GO:0005739(mitochondrion);GO:0006508(proteolysis);GO:0008236(serine-type peptidase activity);GO:0009507(chloroplast);GO:0009534(chloroplast thylakoid);GO:0009535(chloroplast thylakoid membrane);GO:0009543(chloroplast thylakoid lumen);GO:0009579(thylakoid);GO:0009735(response to cytokinin);GO:0010206(pho…	NA	NA	NA	PREDICTED: protease Do-like 1, chloroplastic [Pyrus x bretschneideri]	13.4253	36.7907	2.74041	1.45439	0.0165787	0.148523
D8674_022926	gnl|WGS:SMOL|Pdr3g017260.1	GO:0003883(CTP synthase activity);GO:0005737(cytoplasm)	00240(Pyrimidine metabolism)	K01937	EC:6.3.4.2	PREDICTED: CTP synthase-like [Pyrus x bretschneideri]	0.419493	1.24412	2.96578	1.56841	0.0166223	0.148844
D8674_020830	gnl|WGS:SMOL|Pdr2g007880.1	GO:0003777(microtubule motor activity);GO:0005871(kinesin complex);GO:0007018(microtubule-based movement);GO:0016887(ATPase activity)	00970(Aminoacyl-tRNA biosynthesis)	K01873	EC:6.1.1.9	T4.15 [Malus x robusta]	1.61089	4.52133	2.80673	1.48889	0.0167168	0.149548
D8674_032185	gnl|WGS:SMOL|Pdr7g021090.1	GO:0005739(mitochondrion);GO:0005783(endoplasmic reticulum);GO:0005794(Golgi apparatus);GO:0005829(cytosol);GO:0005886(plasma membrane);GO:0006457(protein folding);GO:0009507(chloroplast);GO:0016021(integral component of membrane);GO:0030176(integral component of endoplasmic reticulum membrane);GO:0031204(posttranslational protein targeting to membrane, translocation)	03060(Protein export);04141(Protein processing in endoplasmic reticulum)	K09540	NA	PREDICTED: dnaJ protein ERDJ2A-like [Pyrus x bretschneideri]	45.7252	124.745	2.72814	1.44792	0.0167351	0.149579
D8674_040684	gnl|WGS:SMOL|Pdr0g041990.1	GO:0005634(nucleus)	NA	NA	NA	PREDICTED: uncharacterized protein LOC103957008 [Pyrus x bretschneideri]	9.1037	24.8831	2.7333	1.45064	0.0168623	0.150345
D8674_009178	gnl|WGS:SMOL|Pdr12g018860.1	NA	NA	NA	NA	hypothetical protein DVH24_035044 [Malus domestica]	86.8033	236.539	2.725	1.44626	0.0168833	0.150345
D8674_005664	gnl|WGS:SMOL|Pdr11g009250.1	GO:0005634(nucleus);GO:0008143(poly(A) binding)	03013(RNA transport)	K03231	NA	PREDICTED: polyadenylate-binding protein RBP45C-like [Pyrus x bretschneideri]	203.42	553.472	2.72083	1.44405	0.0169391	0.150537
D8674_015963	gnl|WGS:SMOL|Pdr16g003680.3	GO:0004672(protein kinase activity);GO:0005524(ATP binding);GO:0005634(nucleus);GO:0005737(cytoplasm);GO:0006468(protein phosphorylation)	NA	NA	NA	PREDICTED: serine/threonine-protein kinase prpf4B isoform X1 [Pyrus x bretschneideri]	15.3228	41.7022	2.72157	1.44444	0.0169667	0.150662
D8674_022767	gnl|WGS:SMOL|Pdr3g015670.1	GO:0005096(GTPase activator activity);GO:0005737(cytoplasm)	NA	NA	NA	PREDICTED: rho GTPase-activating protein 2 [Pyrus x bretschneideri]	1.68588	4.77923	2.83486	1.50328	0.0171145	0.151739
D8674_036677	gnl|WGS:SMOL|Pdr0g001920.1	GO:0001666(response to hypoxia);GO:0003677(DNA binding);GO:0003700(DNA binding transcription factor activity);GO:0005515(protein binding);GO:0005634(nucleus);GO:0005737(cytoplasm);GO:0006351(transcription, DNA-templated);GO:0006355(regulation of transcription, DNA-templated);GO:0009408(response to heat);GO:0009507(chloroplast);GO:0009644(response to high light intensity);GO:0010200(response to ch…	NA	NA	NA	PREDICTED: heat stress transcription factor A-2-like [Pyrus x bretschneideri]	5.76912	15.7768	2.7347	1.45138	0.0171399	0.151892
D8674_014047	gnl|WGS:SMOL|Pdr15g013390.1	GO:0005515(protein binding)	00195(Photosynthesis)	K02641	EC:1.18.1.2	PREDICTED: ferredoxin--NADP reductase, leaf isozyme, chloroplastic [Pyrus x bretschneideri]	15.5754	42.4074	2.72271	1.44504	0.0171481	0.151894
D8674_008728	gnl|WGS:SMOL|Pdr12g014360.1	GO:0000398(mRNA splicing, via spliceosome);GO:0017070(U6 snRNA binding);GO:0030621(U4 snRNA binding);GO:0046540(U4/U6 x U5 tri-snRNP complex)	03040(Spliceosome)	K12662	NA	PREDICTED: U4/U6 small nuclear ribonucleoprotein PRP4-like protein [Pyrus x bretschneideri]	18.2773	49.6696	2.71756	1.44231	0.0171731	0.152043
D8674_003941	gnl|WGS:SMOL|Pdr10g020950.1	GO:0005634(nucleus);GO:0005737(cytoplasm);GO:0005829(cytosol);GO:0009056(catabolic process);GO:0052689(carboxylic ester hydrolase activity)	NA	NA	NA	PREDICTED: probable carboxylesterase 12 [Malus domestica]	2.43846	6.73965	2.7639	1.4667	0.0171931	0.15215
D8674_006721	gnl|WGS:SMOL|Pdr11g019820.1	GO:0005524(ATP binding);GO:0005739(mitochondrion);GO:0006952(defense response);GO:0043531(ADP binding)	04626(Plant-pathogen interaction)	K13459	NA	PREDICTED: probable disease resistance protein At4g27220 [Pyrus x bretschneideri]	0.619736	1.72971	2.79104	1.4808	0.0172386	0.152351
D8674_040063	gnl|WGS:SMOL|Pdr0g035780.1	GO:0004144(diacylglycerol O-acyltransferase activity);GO:0005886(plasma membrane);GO:0019432(triglyceride biosynthetic process);GO:0047196(long-chain-alcohol O-fatty-acyltransferase activity)	00073(Cutin, suberine and wax biosynthesis)	K15406	EC:2.3.1.75;EC:2.3.1.20	PREDICTED: O-acyltransferase WSD1-like isoform X2 [Pyrus x bretschneideri]	4.31121	11.793	2.73543	1.45177	0.0173307	0.152438
D8674_041685	gnl|WGS:SMOL|Pdr0g052000.1	GO:0004722(protein serine/threonine phosphatase activity);GO:0005634(nucleus);GO:0005886(plasma membrane);GO:0006470(protein dephosphorylation);GO:0046872(metal ion binding)	NA	NA	NA	PREDICTED: probable protein phosphatase 2C 60 [Pyrus x bretschneideri]	97.9479	265.021	2.70574	1.43602	0.017517	0.153789
D8674_007747	gnl|WGS:SMOL|Pdr12g004550.1	GO:0005515(protein binding);GO:0005634(nucleus);GO:0006351(transcription, DNA-templated);GO:0006355(regulation of transcription, DNA-templated);GO:0010072(primary shoot apical meristem specification)	NA	NA	NA	PREDICTED: topless-related protein 3-like [Malus domestica]	7.3396	19.8332	2.70222	1.43415	0.0178225	0.156108
D8674_021100	gnl|WGS:SMOL|Pdr2g010580.1	NA	NA	NA	NA	hypothetical protein DVH24_006599 [Malus domestica]	13.7663	37.2946	2.70912	1.43782	0.0178851	0.156511
D8674_036445	gnl|WGS:SMOL|Pdr9g019040.1	GO:0003677(DNA binding);GO:0003700(DNA binding transcription factor activity);GO:0005634(nucleus);GO:0006355(regulation of transcription, DNA-templated);GO:0048653(anther development)	04075(Plant hormone signal transduction)	K13415	EC:2.7.10.1;EC:2.7.11.1	squamosa promoter-binding-like protein 18 [Malus domestica]	1.79962	4.98745	2.7714	1.47061	0.0180242	0.157582
D8674_027140	gnl|WGS:SMOL|Pdr5g016160.1	GO:0005737(cytoplasm);GO:0005773(vacuole);GO:0005794(Golgi apparatus);GO:0005829(cytosol);GO:0005886(plasma membrane);GO:0008270(zinc ion binding);GO:0009507(chloroplast);GO:0009535(chloroplast thylakoid membrane);GO:0009706(chloroplast inner membrane);GO:0009941(chloroplast envelope);GO:0016491(oxidoreductase activity);GO:0055114(oxidation-reduction process)	NA	NA	NA	PREDICTED: putative quinone-oxidoreductase homolog, chloroplastic [Pyrus x bretschneideri]	176.215	474.091	2.69041	1.42782	0.0180487	0.157723
D8674_012121	gnl|WGS:SMOL|Pdr14g013580.1	GO:0007154(cell communication);GO:0009505(plant-type cell wall);GO:0030247(polysaccharide binding);GO:0042973(glucan endo-1,3-beta-D-glucosidase activity);GO:0046658(anchored component of plasma membrane)	00500(Starch and sucrose metabolism)	K19891	EC:3.2.1.39	PREDICTED: glucan endo-1,3-beta-glucosidase 11-like isoform X1 [Pyrus x bretschneideri]	2.77209	7.5396	2.71983	1.44351	0.0180795	0.15792
D8674_027099	gnl|WGS:SMOL|Pdr5g015750.1	NA	NA	NA	NA	hypothetical protein DVH24_010390 [Malus domestica]	16.3324	44.5499	2.7277	1.44769	0.0181919	0.158754
D8674_035489	gnl|WGS:SMOL|Pdr9g009480.1	GO:0003700(DNA binding transcription factor activity);GO:0005634(nucleus);GO:0006351(transcription, DNA-templated);GO:0006355(regulation of transcription, DNA-templated)	NA	NA	NA	PREDICTED: uncharacterized protein LOC103936849 isoform X2 [Pyrus x bretschneideri]	8.35726	22.5127	2.69379	1.42964	0.0182453	0.158927
D8674_018281	gnl|WGS:SMOL|Pdr17g002110.1	GO:0001558(regulation of cell growth);GO:0003677(DNA binding);GO:0003700(DNA binding transcription factor activity);GO:0005515(protein binding);GO:0005634(nucleus);GO:0005739(mitochondrion);GO:0006351(transcription, DNA-templated);GO:0006355(regulation of transcription, DNA-templated);GO:0009637(response to blue light);GO:0009651(response to salt stress);GO:0009965(leaf morphogenesis);GO:0017148(…	NA	NA	NA	PREDICTED: homeobox-leucine zipper protein HAT5 [Pyrus x bretschneideri]	2.91462	7.95214	2.72837	1.44804	0.0183149	0.159292
D8674_025137	gnl|WGS:SMOL|Pdr4g017100.1	NA	NA	NA	NA	-	4.27153	11.7614	2.75345	1.46124	0.0183246	0.159292
D8674_031505	gnl|WGS:SMOL|Pdr7g014290.1	GO:0006629(lipid metabolic process);GO:0016020(membrane);GO:0016298(lipase activity)	00561(Glycerolipid metabolism)	K01054	EC:3.1.1.23	PREDICTED: caffeoylshikimate esterase-like [Pyrus x bretschneideri]	8.36158	22.5892	2.70155	1.43379	0.0183295	0.159292
D8674_025758	gnl|WGS:SMOL|Pdr5g002340.1	GO:0003735(structural constituent of ribosome);GO:0006412(translation)	NA	NA	NA	hypothetical protein DVH24_030590 [Malus domestica]	0.864095	2.38823	2.76385	1.46668	0.0183718	0.159586
D8674_009101	gnl|WGS:SMOL|Pdr12g018090.1	GO:0004674(protein serine/threonine kinase activity);GO:0005886(plasma membrane);GO:0006468(protein phosphorylation)	04626(Plant-pathogen interaction)	K13466	NA	PREDICTED: LRR receptor-like serine/threonine-protein kinase GSO2 [Pyrus x bretschneideri]	2.38719	6.46162	2.70679	1.43658	0.0183932	0.159699
D8674_042592	gnl|WGS:SMOL|Pdr0g061070.1	GO:0004860(protein kinase inhibitor activity);GO:0005515(protein binding);GO:0005634(nucleus);GO:0005829(cytosol);GO:0005886(plasma membrane);GO:0006629(lipid metabolic process);GO:0009742(brassinosteroid mediated signaling pathway);GO:0010423(negative regulation of brassinosteroid biosynthetic process);GO:0046982(protein heterodimerization activity)	04075(Plant hormone signal transduction)	K14499	NA	PREDICTED: BRI1 kinase inhibitor 1-like [Malus domestica]	2.45689	6.80961	2.77164	1.47074	0.0184059	0.159725
D8674_040336	gnl|WGS:SMOL|Pdr0g038510.1	GO:0005789(endoplasmic reticulum membrane);GO:0015485(cholesterol binding);GO:0032933(SREBP signaling pathway)	04075(Plant hormone signal transduction)	K14500	EC:2.7.11.1	PREDICTED: uncharacterized protein LOC103954025 [Pyrus x bretschneideri]	3.23851	8.88139	2.74243	1.45546	0.0184527	0.159864
D8674_015485	gnl|WGS:SMOL|Pdr15g027770.1	GO:0005829(cytosol);GO:0008757(S-adenosylmethionine-dependent methyltransferase activity);GO:0032259(methylation)	NA	NA	NA	PREDICTED: uncharacterized protein LOC103954775 [Pyrus x bretschneideri]	2.59888	7.1557	2.75338	1.4612	0.0184929	0.159975
D8674_016819	gnl|WGS:SMOL|Pdr16g012240.1	GO:0005643(nuclear pore);GO:0005654(nucleoplasm);GO:0005829(cytosol);GO:0006607(NLS-bearing protein import into nucleus);GO:0008139(nuclear localization sequence binding)	NA	NA	NA	PREDICTED: importin subunit alpha-2 [Malus domestica]	12.42	33.3403	2.68441	1.42461	0.0185041	0.159999
D8674_020846	gnl|WGS:SMOL|Pdr2g008040.1	GO:0005730(nucleolus)	NA	NA	NA	PREDICTED: protein AATF-like isoform X2 [Malus domestica]	2.22511	6.1079	2.74499	1.4568	0.0185226	0.160085
D8674_031475	gnl|WGS:SMOL|Pdr7g013990.1	GO:0000387(spliceosomal snRNP assembly);GO:0000974(Prp19 complex);GO:0017070(U6 snRNA binding);GO:0036002(pre-mRNA binding);GO:0071006(U2-type catalytic step 1 spliceosome);GO:0071007(U2-type catalytic step 2 spliceosome)	03040(Spliceosome)	K12872	NA	PREDICTED: zinc finger CCCH domain-containing protein 40-like [Pyrus x bretschneideri]	62.2704	166.491	2.67368	1.41883	0.0187047	0.161127
D8674_037345	gnl|WGS:SMOL|Pdr0g008600.1	GO:0004430(1-phosphatidylinositol 4-kinase activity);GO:0005524(ATP binding);GO:0005575(cellular_component);GO:0016301(kinase activity);GO:0016310(phosphorylation);GO:0046777(protein autophosphorylation);GO:0046854(phosphatidylinositol phosphorylation)	03008(Ribosome biogenesis in eukaryotes)	K14544	NA	PREDICTED: phosphatidylinositol 4-kinase gamma 7-like [Pyrus x bretschneideri]	33.842	90.4536	2.67282	1.41836	0.0187624	0.161418
D8674_004544	gnl|WGS:SMOL|Pdr10g026980.1	GO:0003677(DNA binding);GO:0003700(DNA binding transcription factor activity);GO:0005634(nucleus);GO:0006351(transcription, DNA-templated);GO:0006355(regulation of transcription, DNA-templated)	00040(Pentose and glucuronate interconversions)	K01051	EC:3.1.1.11	PREDICTED: trihelix transcription factor GT-2-like [Pyrus x bretschneideri]	15.6	41.728	2.67486	1.41947	0.0188237	0.161798
D8674_012929	gnl|WGS:SMOL|Pdr15g002210.1	GO:0009813(flavonoid biosynthetic process);GO:0043231(intracellular membrane-bounded organelle);GO:0052696(flavonoid glucuronidation);GO:0080043(quercetin 3-O-glucosyltransferase activity);GO:0080044(quercetin 7-O-glucosyltransferase activity)	NA	NA	NA	7-deoxyloganetin glucosyltransferase-like [Prunus yedoensis var. nudiflora]	1.26976	3.50143	2.75755	1.46339	0.0188378	0.161846
D8674_017532	gnl|WGS:SMOL|Pdr16g019370.1	GO:0000381(regulation of alternative mRNA splicing, via spliceosome);GO:0000389(mRNA 3'-splice site recognition);GO:0003723(RNA binding);GO:0005686(U2 snRNP);GO:0071004(U2-type prespliceosome);GO:0071013(catalytic step 2 spliceosome)	03040(Spliceosome)	K12825	NA	hypothetical protein DVH24_002133 [Malus domestica]	1.9113	5.19862	2.71994	1.44358	0.0188605	0.161967
D8674_027096	gnl|WGS:SMOL|Pdr5g015720.1	GO:0003677(DNA binding);GO:0003700(DNA binding transcription factor activity);GO:0005634(nucleus);GO:0006355(regulation of transcription, DNA-templated)	NA	NA	NA	PREDICTED: uncharacterized protein LOC103961670 [Pyrus x bretschneideri]	3.11084	8.45362	2.71747	1.44226	0.0188702	0.161976
D8674_042566	gnl|WGS:SMOL|Pdr0g060810.1	GO:0004693(cyclin-dependent protein serine/threonine kinase activity);GO:0005515(protein binding);GO:0005524(ATP binding);GO:0005634(nucleus);GO:0005829(cytosol);GO:0006468(protein phosphorylation);GO:0007346(regulation of mitotic cell cycle);GO:0010468(regulation of gene expression);GO:0016301(kinase activity);GO:0019912(cyclin-dependent protein kinase activating kinase activity);GO:0048586(regu…	NA	NA	NA	PREDICTED: cyclin-dependent kinase G-2 [Pyrus x bretschneideri]	6.42702	17.2022	2.67655	1.42037	0.0189125	0.162192
D8674_001043	gnl|WGS:SMOL|Pdr1g010430.1	GO:0008152(metabolic process);GO:0008483(transaminase activity);GO:0009507(chloroplast)	NA	NA	NA	PREDICTED: uncharacterized protein LOC103966660 [Pyrus x bretschneideri]	114.379	305.041	2.66693	1.41518	0.0189404	0.162302
D8674_041831	gnl|WGS:SMOL|Pdr0g053460.1	GO:0003674(molecular_function);GO:0005634(nucleus);GO:0008150(biological_process)	NA	NA	NA	hypothetical protein DVH24_032233 [Malus domestica]	1.13651	3.14284	2.76535	1.46746	0.0189441	0.162302
D8674_001189	gnl|WGS:SMOL|Pdr1g011890.1	GO:0002229(defense response to oomycetes);GO:0004674(protein serine/threonine kinase activity);GO:0005524(ATP binding);GO:0005886(plasma membrane);GO:0006468(protein phosphorylation);GO:0016021(integral component of membrane);GO:0016301(kinase activity);GO:0030246(carbohydrate binding);GO:0042742(defense response to bacterium)	NA	NA	NA	PREDICTED: L-type lectin-domain containing receptor kinase S.4-like [Pyrus x bretschneideri]	9.41286	25.1611	2.67305	1.41849	0.0190299	0.162828
D8674_033419	gnl|WGS:SMOL|Pdr8g009650.1	GO:0000303(response to superoxide);GO:0003950(NAD+ ADP-ribosyltransferase activity);GO:0005515(protein binding);GO:0005634(nucleus);GO:0005737(cytoplasm);GO:0006809(nitric oxide biosynthetic process);GO:0006970(response to osmotic stress);GO:0006979(response to oxidative stress);GO:0009414(response to water deprivation);GO:0009651(response to salt stress);GO:0009723(response to ethylene);GO:00097…	NA	NA	NA	PREDICTED: probable inactive poly [ADP-ribose] polymerase SRO3 [Pyrus x bretschneideri]	22.5855	60.224	2.66649	1.41494	0.0190397	0.162839
D8674_032352	gnl|WGS:SMOL|Pdr7g022760.1	GO:0003674(molecular_function);GO:0005634(nucleus);GO:0005829(cytosol);GO:0005854(nascent polypeptide-associated complex);GO:0015031(protein transport)	NA	NA	NA	hypothetical protein DVH24_031516 [Malus domestica]	3.13177	8.68798	2.77414	1.47204	0.0190871	0.163022
D8674_007796	gnl|WGS:SMOL|Pdr12g005040.1	GO:0008152(metabolic process);GO:0009507(chloroplast);GO:0009534(chloroplast thylakoid);GO:0009535(chloroplast thylakoid membrane);GO:0009570(chloroplast stroma);GO:0010196(nonphotochemical quenching);GO:0016021(integral component of membrane);GO:0016787(hydrolase activity);GO:0042651(thylakoid membrane);GO:0045454(cell redox homeostasis);GO:0046872(metal ion binding)	00740(Riboflavin metabolism)	K20884	EC:2.7.1.26;EC:3.1.3.102	PREDICTED: NHL repeat-containing protein 2 [Pyrus x bretschneideri]	4.37284	11.6988	2.67533	1.41972	0.0190976	0.163038
D8674_041073	gnl|WGS:SMOL|Pdr0g045880.1	GO:0005634(nucleus);GO:0008270(zinc ion binding);GO:0009737(response to abscisic acid);GO:0010200(response to chitin)	NA	NA	NA	hypothetical protein DVH24_037186 [Malus domestica]	39.303	104.892	2.6688	1.41619	0.0191298	0.163122
D8674_035362	gnl|WGS:SMOL|Pdr9g008210.1	GO:0003735(structural constituent of ribosome);GO:0006412(translation)	NA	NA	NA	PREDICTED: solute carrier family 25 member 44 [Pyrus x bretschneideri]	25.8138	68.795	2.66505	1.41416	0.0191642	0.163122
D8674_007669	gnl|WGS:SMOL|Pdr12g003770.1	GO:0004040(amidase activity);GO:0005654(nucleoplasm);GO:0005737(cytoplasm);GO:0005829(cytosol);GO:0009684(indoleacetic acid biosynthetic process);GO:0009851(auxin biosynthetic process);GO:0016810(hydrolase activity, acting on carbon-nitrogen (but not peptide) bonds);GO:0043864(indoleacetamide hydrolase activity)	00330(Arginine and proline metabolism);00360(Phenylalanine metabolism);00380(Tryptophan metabolism)	K01426	EC:3.5.1.4	PREDICTED: amidase 1-like isoform X3 [Pyrus x bretschneideri]	26.7214	71.1636	2.66317	1.41315	0.0193011	0.163741
D8674_003394	gnl|WGS:SMOL|Pdr10g015480.1	GO:0005773(vacuole);GO:0005887(integral component of plasma membrane);GO:0009506(plasmodesma);GO:0009992(cellular water homeostasis);GO:0015250(water channel activity);GO:0015254(glycerol channel activity);GO:0034220(ion transmembrane transport)	NA	NA	NA	hypothetical protein DVH24_034557 [Malus domestica]	1.19556	3.32234	2.7789	1.47451	0.0193042	0.163741
D8674_042187	gnl|WGS:SMOL|Pdr0g057020.1	GO:0003674(molecular_function);GO:0008150(biological_process);GO:0009507(chloroplast)	NA	NA	NA	PREDICTED: cilia- and flagella-associated protein 20 isoform X1 [Pyrus x bretschneideri]	5.19413	14.0588	2.70667	1.43652	0.0193101	0.163741
D8674_006929	gnl|WGS:SMOL|Pdr11g021900.1	GO:0005524(ATP binding);GO:0005634(nucleus);GO:0005737(cytoplasm);GO:0005886(plasma membrane);GO:0006952(defense response);GO:0007165(signal transduction);GO:0009626(plant-type hypersensitive response);GO:0009814(defense response, incompatible interaction);GO:0043531(ADP binding)	NA	NA	NA	PREDICTED: putative disease resistance protein RGA1 isoform X1 [Pyrus x bretschneideri]	28.4606	75.6483	2.658	1.41034	0.0193349	0.163877
D8674_022753	gnl|WGS:SMOL|Pdr3g015530.1	GO:0000160(phosphorelay signal transduction system);GO:0005634(nucleus);GO:0005737(cytoplasm);GO:0009736(cytokinin-activated signaling pathway);GO:0009927(histidine phosphotransfer kinase activity);GO:0016310(phosphorylation);GO:0043424(protein histidine kinase binding)	04075(Plant hormone signal transduction)	K14490	NA	PREDICTED: histidine-containing phosphotransfer protein 1 [Malus domestica]	37.3788	99.4356	2.66022	1.41154	0.0193736	0.163989
D8674_038919	gnl|WGS:SMOL|Pdr0g024340.1	GO:0003676(nucleic acid binding);GO:0003723(RNA binding);GO:0005634(nucleus);GO:0008150(biological_process)	NA	NA	NA	PREDICTED: KH domain-containing protein At5g56140-like [Pyrus x bretschneideri]	32.8062	87.2885	2.66073	1.41182	0.019404	0.164141
D8674_042419	gnl|WGS:SMOL|Pdr0g059340.1	GO:0005634(nucleus);GO:0008568(microtubule-severing ATPase activity);GO:0031122(cytoplasmic microtubule organization)	00730(Thiamine metabolism)	K00949	EC:2.7.6.2	hypothetical protein DVH24_002667 [Malus domestica]	1.06423	2.90563	2.73028	1.44905	0.0194255	0.164141
D8674_033052	gnl|WGS:SMOL|Pdr8g005980.1	GO:0003674(molecular_function);GO:0005576(extracellular region);GO:0008150(biological_process);GO:0016021(integral component of membrane)	NA	NA	NA	PREDICTED: uncharacterized protein LOC103428593 [Malus domestica]	130.17	345.707	2.65582	1.40915	0.0194281	0.164141
D8674_016762	gnl|WGS:SMOL|Pdr16g011670.1	GO:0003677(DNA binding);GO:0003700(DNA binding transcription factor activity);GO:0005634(nucleus);GO:0006351(transcription, DNA-templated);GO:0006355(regulation of transcription, DNA-templated);GO:0016021(integral component of membrane);GO:0046872(metal ion binding)	NA	NA	NA	PREDICTED: squamosa promoter-binding-like protein 1 [Pyrus x bretschneideri]	20.5522	54.5863	2.65599	1.40925	0.0194669	0.164258
D8674_022442	gnl|WGS:SMOL|Pdr3g012420.1	GO:0005515(protein binding);GO:0009507(chloroplast);GO:0009534(chloroplast thylakoid);GO:0009640(photomorphogenesis);GO:0009647(skotomorphogenesis);GO:0009723(response to ethylene);GO:0009941(chloroplast envelope);GO:0015979(photosynthesis);GO:0015995(chlorophyll biosynthetic process);GO:0016491(oxidoreductase activity);GO:0016630(protochlorophyllide reductase activity);GO:0055114(oxidation-reduc…	00860(Porphyrin and chlorophyll metabolism)	K00218	EC:1.3.1.33	PREDICTED: protochlorophyllide reductase, chloroplastic [Pyrus x bretschneideri]	62.8173	166.792	2.65519	1.40882	0.0194837	0.164326
D8674_031608	gnl|WGS:SMOL|Pdr7g015320.1	GO:0003723(RNA binding);GO:0003729(mRNA binding);GO:0003730(mRNA 3'-UTR binding);GO:0005737(cytoplasm);GO:0005829(cytosol);GO:0006417(regulation of translation)	NA	NA	NA	PREDICTED: pumilio homolog 1-like isoform X1 [Pyrus x bretschneideri]	27.2413	72.2644	2.65275	1.40749	0.0195517	0.164826
D8674_014945	gnl|WGS:SMOL|Pdr15g022370.1	GO:0003700(DNA binding transcription factor activity);GO:0005634(nucleus);GO:0008270(zinc ion binding);GO:0009585(red, far-red light phototransduction);GO:0009639(response to red or far red light);GO:0010018(far-red light signaling pathway);GO:0042753(positive regulation of circadian rhythm);GO:0045893(positive regulation of transcription, DNA-templated)	NA	NA	NA	PREDICTED: protein FAR1-RELATED SEQUENCE 6-like [Pyrus x bretschneideri]	2.58459	6.97119	2.69721	1.43147	0.0196258	0.165378
D8674_029644	gnl|WGS:SMOL|Pdr6g014520.1	GO:0004571(mannosyl-oligosaccharide 1,2-alpha-mannosidase activity);GO:0005783(endoplasmic reticulum);GO:0006491(N-glycan processing);GO:0030433(ubiquitin-dependent ERAD pathway);GO:0030968(endoplasmic reticulum unfolded protein response);GO:0097466(ubiquitin-dependent glycoprotein ERAD pathway)	04141(Protein processing in endoplasmic reticulum)	K10084	NA	hypothetical protein DVH24_039561 [Malus domestica]	5.1962	14.145	2.72217	1.44476	0.0197176	0.166002
D8674_006625	gnl|WGS:SMOL|Pdr11g018860.1	GO:0004674(protein serine/threonine kinase activity);GO:0004675(transmembrane receptor protein serine/threonine kinase activity);GO:0004713(protein tyrosine kinase activity);GO:0005524(ATP binding);GO:0005886(plasma membrane);GO:0006468(protein phosphorylation);GO:0006952(defense response);GO:0007166(cell surface receptor signaling pathway);GO:0009507(chloroplast);GO:0016301(kinase activity);GO:1…	NA	NA	NA	PREDICTED: protein kinase APK1A, chloroplastic-like isoform X1 [Pyrus x bretschneideri]	2.27441	6.12003	2.69082	1.42805	0.0197789	0.166296
D8674_036748	gnl|WGS:SMOL|Pdr0g002630.1	GO:0003700(DNA binding transcription factor activity);GO:0005634(nucleus);GO:0006355(regulation of transcription, DNA-templated);GO:0007275(multicellular organism development);GO:0046872(metal ion binding)	NA	NA	NA	PREDICTED: protein tesmin/TSO1-like CXC 5 [Pyrus x bretschneideri]	3.68219	9.83572	2.67116	1.41747	0.0198817	0.166863
D8674_009106	gnl|WGS:SMOL|Pdr12g018140.1	GO:0002239(response to oomycetes);GO:0005618(cell wall);GO:0006952(defense response);GO:0007165(signal transduction);GO:0050832(defense response to fungus)	04626(Plant-pathogen interaction)	K13466	NA	PREDICTED: LRR receptor-like serine/threonine-protein kinase GSO2 [Pyrus x bretschneideri]	0.752087	2.04871	2.72403	1.44574	0.0200399	0.168068
D8674_012547	gnl|WGS:SMOL|Pdr14g017840.1	GO:0003677(DNA binding);GO:0003700(DNA binding transcription factor activity);GO:0005515(protein binding);GO:0005634(nucleus);GO:0006351(transcription, DNA-templated);GO:0006355(regulation of transcription, DNA-templated);GO:0009908(flower development);GO:0043565(sequence-specific DNA binding);GO:0046872(metal ion binding);GO:0048510(regulation of timing of transition from vegetative to reproduct…	04712(Circadian rhythm - plant)	K16222	NA	hypothetical protein DVH24_023786 [Malus domestica]	2.77487	7.44469	2.6829	1.42379	0.0200496	0.168068
D8674_037444	gnl|WGS:SMOL|Pdr0g009590.1	GO:0004721(phosphoprotein phosphatase activity);GO:0004722(protein serine/threonine phosphatase activity);GO:0005634(nucleus);GO:0005737(cytoplasm);GO:0006470(protein dephosphorylation);GO:0009507(chloroplast);GO:0046872(metal ion binding)	03015(mRNA surveillance pathway)	K06269	EC:3.1.3.16	PREDICTED: serine/threonine-protein phosphatase PP1 isozyme 2-like [Pyrus x bretschneideri]	1.67985	4.56572	2.71793	1.44251	0.020052	0.168068
D8674_040628	gnl|WGS:SMOL|Pdr0g041430.1	GO:0005737(cytoplasm);GO:0005777(peroxisome);GO:0008150(biological_process);GO:0016788(hydrolase activity, acting on ester bonds);GO:0047617(acyl-CoA hydrolase activity)	NA	NA	NA	hypothetical protein DVH24_038535 [Malus domestica]	3.49093	9.41743	2.69768	1.43172	0.0200853	0.168272
D8674_025965	gnl|WGS:SMOL|Pdr5g004410.1	GO:0003674(molecular_function);GO:0008150(biological_process)	NA	NA	NA	PREDICTED: uncharacterized protein LOC103936468 [Pyrus x bretschneideri]	3.95541	10.5749	2.67353	1.41874	0.0201032	0.168348
D8674_037225	gnl|WGS:SMOL|Pdr0g007400.1	GO:0005737(cytoplasm);GO:0016740(transferase activity);GO:0016747(transferase activity, transferring acyl groups other than amino-acyl groups)	00940(Phenylpropanoid biosynthesis);00945(Stilbenoid, diarylheptanoid and gingerol biosynthesis);00941(Flavonoid biosynthesis)	K13065	EC:2.3.1.133	PREDICTED: vinorine synthase-like [Malus domestica]	18.144	47.9129	2.64071	1.40092	0.0202527	0.169074
D8674_042528	gnl|WGS:SMOL|Pdr0g060430.1	GO:0005739(mitochondrion);GO:0005747(mitochondrial respiratory chain complex I);GO:0006970(response to osmotic stress);GO:0008137(NADH dehydrogenase (ubiquinone) activity);GO:0009631(cold acclimation);GO:0022900(electron transport chain);GO:0050897(cobalt ion binding)	00190(Oxidative phosphorylation)	K03937	NA	PREDICTED: uncharacterized protein LOC103951252 [Pyrus x bretschneideri]	0.788954	2.14492	2.71869	1.44291	0.0202809	0.169235
D8674_015447	gnl|WGS:SMOL|Pdr15g027390.1	GO:0001666(response to hypoxia);GO:0003677(DNA binding);GO:0003700(DNA binding transcription factor activity);GO:0005515(protein binding);GO:0005634(nucleus);GO:0005737(cytoplasm);GO:0006351(transcription, DNA-templated);GO:0006355(regulation of transcription, DNA-templated);GO:0009408(response to heat);GO:0009507(chloroplast);GO:0009644(response to high light intensity);GO:0010200(response to ch…	NA	NA	NA	PREDICTED: heat shock factor protein HSF30 isoform X2 [Pyrus x bretschneideri]	10.3282	27.3015	2.64339	1.40239	0.0203828	0.169859
D8674_014672	gnl|WGS:SMOL|Pdr15g019640.1	GO:0003723(RNA binding);GO:0005515(protein binding);GO:0005634(nucleus)	03015(mRNA surveillance pathway)	K14405	NA	PREDICTED: FIP1[V]-like protein [Malus domestica]	43.8431	115.339	2.63073	1.39546	0.0204296	0.170025
D8674_015227	gnl|WGS:SMOL|Pdr15g025190.1	GO:0003723(RNA binding);GO:0003729(mRNA binding);GO:0005634(nucleus);GO:0005737(cytoplasm);GO:0006397(mRNA processing);GO:0008143(poly(A) binding);GO:0009507(chloroplast)	03013(RNA transport)	K03231	NA	hypothetical protein DVH24_012418 [Malus domestica]	3.43529	9.14243	2.66133	1.41215	0.020486	0.170363
D8674_007480	gnl|WGS:SMOL|Pdr12g001880.1	GO:0003723(RNA binding);GO:0004386(helicase activity);GO:0005515(protein binding);GO:0005524(ATP binding);GO:0005634(nucleus);GO:0005681(spliceosomal complex);GO:0005730(nucleolus);GO:0005829(cytosol);GO:0006397(mRNA processing);GO:0008026(ATP-dependent helicase activity);GO:0008380(RNA splicing);GO:0009793(embryo development ending in seed dormancy);GO:0010228(vegetative to reproductive phase tr…	03040(Spliceosome)	K12854	EC:3.6.4.13	PREDICTED: DExH-box ATP-dependent RNA helicase DExH12-like [Pyrus x bretschneideri]	28.1281	73.9612	2.62944	1.39476	0.0204883	0.170363
D8674_012172	gnl|WGS:SMOL|Pdr14g014090.1	GO:0005634(nucleus);GO:0008270(zinc ion binding);GO:0016021(integral component of membrane);GO:0016567(protein ubiquitination);GO:0043161(proteasome-mediated ubiquitin-dependent protein catabolic process);GO:0046872(metal ion binding)	NA	NA	NA	PREDICTED: RING-H2 finger protein ATL79-like [Pyrus x bretschneideri]	44.8373	117.945	2.6305	1.39534	0.0205444	0.170679
D8674_022768	gnl|WGS:SMOL|Pdr3g015680.1	NA	NA	NA	NA	hypothetical protein DVH24_002744 [Malus domestica]	2.77148	7.74207	2.79348	1.48206	0.0205974	0.170998
D8674_019938	gnl|WGS:SMOL|Pdr17g018680.1	NA	NA	NA	NA	hypothetical protein DVH24_015064 [Malus domestica]	5.55402	15.6716	2.82166	1.49655	0.0206274	0.170998
D8674_025738	gnl|WGS:SMOL|Pdr5g002140.1	GO:0000054(ribosomal subunit export from nucleus);GO:0000460(maturation of 5.8S rRNA);GO:0000470(maturation of LSU-rRNA);GO:0005730(nucleolus);GO:0005829(cytosol);GO:0030687(preribosome, large subunit precursor);GO:0043023(ribosomal large subunit binding);GO:1902626(assembly of large subunit precursor of preribosome)	03008(Ribosome biogenesis in eukaryotes)	K03264	NA	PREDICTED: eukaryotic translation initiation factor 6-2 [Malus domestica]	13.8014	36.3929	2.6369	1.39885	0.0206317	0.170998
D8674_015255	gnl|WGS:SMOL|Pdr15g025470.1	GO:0003674(molecular_function);GO:0005634(nucleus);GO:0009409(response to cold);GO:0010228(vegetative to reproductive phase transition of meristem);GO:0042752(regulation of circadian rhythm);GO:0080167(response to karrikin)	NA	NA	NA	PREDICTED: uncharacterized protein LOC103950130 isoform X1 [Pyrus x bretschneideri]	6.39963	16.9537	2.64916	1.40553	0.0206344	0.170998
D8674_041299	gnl|WGS:SMOL|Pdr0g048140.1	GO:0003674(molecular_function);GO:0005634(nucleus);GO:0009958(positive gravitropism);GO:0009959(negative gravitropism)	NA	NA	NA	PREDICTED: protein SHOOT GRAVITROPISM 6 isoform X3 [Prunus mume]	0.934498	2.59674	2.77876	1.47444	0.0206372	0.170998
D8674_035019	gnl|WGS:SMOL|Pdr9g004780.1	GO:0005886(plasma membrane);GO:0016324(apical plasma membrane);GO:0051819(induction by symbiont of nodulation, tumor or growth in host)	NA	NA	NA	PREDICTED: flotillin-like protein 4 [Malus domestica]	1.07225	2.96212	2.76253	1.46599	0.0206733	0.171036
D8674_012339	gnl|WGS:SMOL|Pdr14g015760.1	GO:0004550(nucleoside diphosphate kinase activity);GO:0005622(intracellular);GO:0006163(purine nucleotide metabolic process);GO:0006220(pyrimidine nucleotide metabolic process);GO:0009142(nucleoside triphosphate biosynthetic process)	00230(Purine metabolism);00240(Pyrimidine metabolism);04016(MAPK signaling pathway - plant)	K00940	EC:2.7.4.6	PREDICTED: nucleoside diphosphate kinase 2, chloroplastic [Malus domestica]	1.28064	3.59667	2.8085	1.4898	0.020678	0.171036
D8674_040575	gnl|WGS:SMOL|Pdr0g040900.1	GO:0005198(structural molecule activity);GO:0005789(endoplasmic reticulum membrane);GO:0005886(plasma membrane);GO:0006970(response to osmotic stress)	00020(Citrate cycle (TCA cycle));00630(Glyoxylate and dicarboxylate metabolism)	K01681	EC:4.2.1.3	PREDICTED: vesicle-associated protein 4-1-like [Pyrus x bretschneideri]	4.42174	11.9203	2.69584	1.43073	0.020711	0.171158
D8674_009917	gnl|WGS:SMOL|Pdr13g005970.1	GO:0003674(molecular_function);GO:0005634(nucleus)	03010(Ribosome)	K02930	NA	PREDICTED: protein MARD1-like [Pyrus x bretschneideri]	14.9187	39.2426	2.63042	1.3953	0.0207265	0.171211
D8674_036704	gnl|WGS:SMOL|Pdr0g002190.1	NA	NA	NA	NA	PREDICTED: uncharacterized protein LOC103963003 isoform X1 [Pyrus x bretschneideri]	0.612543	1.68437	2.7498	1.45933	0.020746	0.171298
D8674_013741	gnl|WGS:SMOL|Pdr15g010330.1	GO:0001673(male germ cell nucleus);GO:0004861(cyclin-dependent protein serine/threonine kinase inhibitor activity);GO:0005515(protein binding);GO:0005634(nucleus);GO:0005654(nucleoplasm);GO:0007050(cell cycle arrest);GO:0016301(kinase activity);GO:0016310(phosphorylation);GO:0030332(cyclin binding);GO:0045736(negative regulation of cyclin-dependent protein serine/threonine kinase activity)	NA	NA	NA	PREDICTED: cyclin-dependent kinase inhibitor 6-like isoform X2 [Pyrus x bretschneideri]	13.3107	35.2177	2.64582	1.40371	0.0208918	0.171975
D8674_005684	gnl|WGS:SMOL|Pdr11g009450.1	NA	NA	NA	NA	PREDICTED: uncharacterized protein LOC108170380 [Malus domestica]	1.63406	4.45114	2.72397	1.44571	0.0210426	0.172388
D8674_029645	gnl|WGS:SMOL|Pdr6g014530.1	GO:0004842(ubiquitin-protein transferase activity);GO:0005524(ATP binding);GO:0005737(cytoplasm);GO:0006511(ubiquitin-dependent protein catabolic process);GO:0016740(transferase activity);GO:0016925(protein sumoylation)	04141(Protein processing in endoplasmic reticulum);04120(Ubiquitin mediated proteolysis)	K06689	EC:2.3.2.23	Ubiquitin-conjugating enzyme E2 8 [Glycine soja]	2.42632	6.61869	2.72788	1.44778	0.0210652	0.172424
D8674_010971	gnl|WGS:SMOL|Pdr14g002080.1	GO:0004364(glutathione transferase activity);GO:0005737(cytoplasm);GO:0006749(glutathione metabolic process)	04120(Ubiquitin mediated proteolysis)	K03354	NA	PREDICTED: uncharacterized protein LOC103956427 [Pyrus x bretschneideri]	13.1302	34.4436	2.62324	1.39135	0.0211539	0.172925
D8674_038085	gnl|WGS:SMOL|Pdr0g016000.1	GO:0000463(maturation of LSU-rRNA from tricistronic rRNA transcript (SSU-rRNA, 5.8S rRNA, LSU-rRNA));GO:0000466(maturation of 5.8S rRNA from tricistronic rRNA transcript (SSU-rRNA, 5.8S rRNA, LSU-rRNA));GO:0005730(nucleolus);GO:0008650(rRNA (uridine-2'-O-)-methyltransferase activity);GO:0016435(rRNA (guanine) methyltransferase activity);GO:0030687(preribosome, large subunit precursor);GO:0031167(…	NA	NA	NA	PREDICTED: putative rRNA methyltransferase [Pyrus x bretschneideri]	5.73249	15.0361	2.62296	1.3912	0.0213116	0.173913
D8674_015072	gnl|WGS:SMOL|Pdr15g023640.1	GO:0005737(cytoplasm);GO:0008115(sarcosine oxidase activity);GO:0046653(tetrahydrofolate metabolic process);GO:0055114(oxidation-reduction process)	00260(Glycine, serine and threonine metabolism);00310(Lysine degradation);04146(Peroxisome)	K00306	EC:1.5.3.1;EC:1.5.3.7	PREDICTED: probable sarcosine oxidase [Pyrus x bretschneideri]	2.29606	6.16318	2.68424	1.42452	0.0213334	0.174015
D8674_007613	gnl|WGS:SMOL|Pdr12g003210.1	GO:0005737(cytoplasm)	NA	NA	NA	PREDICTED: uncharacterized protein LOC103962880 [Pyrus x bretschneideri]	0.690373	1.87365	2.71397	1.4404	0.0215976	0.17579
D8674_015387	gnl|WGS:SMOL|Pdr15g026790.1	GO:0003674(molecular_function);GO:0005739(mitochondrion);GO:0008150(biological_process)	NA	NA	NA	PREDICTED: uncharacterized protein LOC103455873 [Malus domestica]	180.959	471.213	2.60397	1.38072	0.0216106	0.17582
D8674_007560	gnl|WGS:SMOL|Pdr12g002680.1	GO:0003674(molecular_function);GO:0009507(chloroplast);GO:0009535(chloroplast thylakoid membrane);GO:0009643(photosynthetic acclimation);GO:0009941(chloroplast envelope);GO:0016021(integral component of membrane)	NA	NA	NA	PREDICTED: uncharacterized protein LOC103954435 [Pyrus x bretschneideri]	14.2349	37.1568	2.61026	1.3842	0.0216462	0.175958
D8674_025960	gnl|WGS:SMOL|Pdr5g004360.1	GO:0005634(nucleus);GO:0006351(transcription, DNA-templated);GO:0006355(regulation of transcription, DNA-templated);GO:0008327(methyl-CpG binding)	NA	NA	NA	PREDICTED: uncharacterized protein LOC103936471 isoform X1 [Pyrus x bretschneideri]	8.61	22.4664	2.60933	1.38368	0.0216787	0.17607
D8674_004979	gnl|WGS:SMOL|Pdr11g002400.1	GO:0003674(molecular_function);GO:0005739(mitochondrion);GO:0008150(biological_process)	03022(Basal transcription factors);03420(Nucleotide excision repair)	K06634	NA	PREDICTED: uncharacterized protein LOC103947549 [Pyrus x bretschneideri]	53.9107	140.325	2.60292	1.38013	0.0217534	0.176384
D8674_032808	gnl|WGS:SMOL|Pdr8g003540.1	GO:0005509(calcium ion binding);GO:0005515(protein binding);GO:0005737(cytoplasm);GO:0005768(endosome);GO:0005886(plasma membrane);GO:0009507(chloroplast);GO:0009705(plant-type vacuole membrane);GO:0042538(hyperosmotic salinity response);GO:0043266(regulation of potassium ion transport)	NA	NA	NA	PREDICTED: calcineurin B-like protein 10 [Pyrus x bretschneideri]	63.7548	165.687	2.59881	1.37785	0.0218996	0.177407
D8674_018642	gnl|WGS:SMOL|Pdr17g005720.1	GO:0000981(RNA polymerase II transcription factor activity, sequence-specific DNA binding);GO:0001135(transcription factor activity, RNA polymerase II transcription factor recruiting);GO:0003677(DNA binding);GO:0003700(DNA binding transcription factor activity);GO:0005634(nucleus);GO:0006351(transcription, DNA-templated);GO:0006355(regulation of transcription, DNA-templated);GO:0006357(regulation…	NA	NA	NA	hypothetical protein DVH24_028200 [Malus domestica]	3.56786	9.50338	2.66361	1.41338	0.0219443	0.177616
D8674_006302	gnl|WGS:SMOL|Pdr11g015630.1	GO:0000398(mRNA splicing, via spliceosome);GO:0003677(DNA binding);GO:0003723(RNA binding);GO:0005515(protein binding);GO:0005634(nucleus);GO:0005681(spliceosomal complex);GO:0016607(nuclear speck);GO:0030628(pre-mRNA 3'-splice site binding);GO:0046872(metal ion binding);GO:0048573(photoperiodism, flowering);GO:0089701(U2AF)	03040(Spliceosome)	K12836	NA	PREDICTED: splicing factor U2af small subunit B-like [Pyrus x bretschneideri]	18.4721	48.0101	2.59907	1.37799	0.0219991	0.177843
D8674_030826	gnl|WGS:SMOL|Pdr7g007500.1	GO:0000288(nuclear-transcribed mRNA catabolic process, deadenylation-dependent decay);GO:0000932(P-body);GO:0017148(negative regulation of translation);GO:0030015(CCR4-NOT core complex)	03018(RNA degradation)	K12604	NA	PREDICTED: CCR4-NOT transcription complex subunit 1-like isoform X1 [Pyrus x bretschneideri]	23.4831	60.91	2.59377	1.37505	0.0220759	0.178147
D8674_023351	gnl|WGS:SMOL|Pdr3g021510.1	GO:0005737(cytoplasm);GO:0030001(metal ion transport);GO:0046914(transition metal ion binding);GO:0046916(cellular transition metal ion homeostasis)	NA	NA	NA	PREDICTED: uncharacterized protein LOC103407626 [Malus domestica]	6.73963	17.7262	2.63015	1.39514	0.0220879	0.178167
D8674_042792	gnl|WGS:SMOL|Pdr0g063070.1	GO:0005886(plasma membrane);GO:0006820(anion transport);GO:0008381(mechanosensitive ion channel activity);GO:0050982(detection of mechanical stimulus)	NA	NA	NA	hypothetical protein DVH24_018174 [Malus domestica]	0.344292	0.971357	2.82132	1.49637	0.0221076	0.17825
D8674_020330	gnl|WGS:SMOL|Pdr2g002880.1	GO:0004497(monooxygenase activity);GO:0005506(iron ion binding);GO:0005783(endoplasmic reticulum);GO:0016021(integral component of membrane);GO:0016705(oxidoreductase activity, acting on paired donors, with incorporation or reduction of molecular oxygen);GO:0019825(oxygen binding);GO:0020037(heme binding);GO:0055114(oxidation-reduction process)	00073(Cutin, suberine and wax biosynthesis)	K15398	EC:1.14.-.-	hypothetical protein DVH24_026055 [Malus domestica]	1.19403	3.18281	2.6656	1.41446	0.0221331	0.178312
D8674_006617	gnl|WGS:SMOL|Pdr11g018780.1	GO:0003676(nucleic acid binding);GO:0005634(nucleus);GO:0005737(cytoplasm);GO:0008270(zinc ion binding);GO:0051928(positive regulation of calcium ion transport)	NA	NA	NA	PREDICTED: CAX-interacting protein 4-like [Pyrus x bretschneideri]	62.5731	162.128	2.59102	1.37352	0.0222527	0.178962
D8674_007113	gnl|WGS:SMOL|Pdr11g023740.1	GO:0005515(protein binding);GO:0005737(cytoplasm);GO:0008219(cell death);GO:0008289(lipid binding);GO:0009751(response to salicylic acid);GO:0009816(defense response to bacterium, incompatible interaction);GO:0010175(sphingosine transmembrane transporter activity);GO:0120009(intermembrane lipid transfer);GO:0120013(intermembrane lipid transfer activity)	NA	NA	NA	PREDICTED: accelerated cell death 11-like [Pyrus x bretschneideri]	4.41016	11.5679	2.62301	1.39122	0.0222872	0.178962
D8674_004781	gnl|WGS:SMOL|Pdr11g000420.1	GO:0005634(nucleus);GO:0006457(protein folding)	NA	NA	NA	PREDICTED: uncharacterized protein LOC103931979 [Pyrus x bretschneideri]	0.591904	1.6341	2.76075	1.46506	0.0222883	0.178962
D8674_040450	gnl|WGS:SMOL|Pdr0g039650.1	GO:0005634(nucleus)	00480(Glutathione metabolism)	K01255	EC:3.4.11.1	PREDICTED: uncharacterized protein LOC103963323 [Pyrus x bretschneideri]	44.4004	115.069	2.59161	1.37385	0.0223166	0.179093
D8674_006746	gnl|WGS:SMOL|Pdr11g020070.1	NA	04141(Protein processing in endoplasmic reticulum);04120(Ubiquitin mediated proteolysis)	K03094	NA	PREDICTED: trithorax group protein osa-like [Pyrus x bretschneideri]	4.79387	12.4291	2.5927	1.37445	0.0224176	0.179674
D8674_026786	gnl|WGS:SMOL|Pdr5g012620.1	GO:0004497(monooxygenase activity);GO:0044550(secondary metabolite biosynthetic process)	00906(Carotenoid biosynthesis)	K09838	EC:1.14.15.21	PREDICTED: uncharacterized protein LOC103946619 [Pyrus x bretschneideri]	0.896454	2.46949	2.75474	1.46191	0.0224995	0.180177
D8674_007668	gnl|WGS:SMOL|Pdr12g003760.1	GO:0004040(amidase activity);GO:0005654(nucleoplasm);GO:0005737(cytoplasm);GO:0005829(cytosol);GO:0009684(indoleacetic acid biosynthetic process);GO:0009851(auxin biosynthetic process);GO:0016810(hydrolase activity, acting on carbon-nitrogen (but not peptide) bonds);GO:0043864(indoleacetamide hydrolase activity)	00330(Arginine and proline metabolism);00360(Phenylalanine metabolism);00380(Tryptophan metabolism)	K01426	EC:3.5.1.4	PREDICTED: amidase 1-like isoform X3 [Pyrus x bretschneideri]	65.2428	168.462	2.58209	1.36854	0.0226762	0.181361
D8674_030245	gnl|WGS:SMOL|Pdr7g001690.1	GO:0005515(protein binding);GO:0005524(ATP binding);GO:0005576(extracellular region);GO:0006952(defense response);GO:0043531(ADP binding)	NA	NA	NA	PREDICTED: disease resistance protein RGA2-like [Pyrus x bretschneideri]	0.359163	0.98917	2.7541	1.46158	0.0228139	0.18226
D8674_026724	gnl|WGS:SMOL|Pdr5g012000.1	GO:0004888(transmembrane signaling receptor activity);GO:0005525(GTP binding);GO:0009507(chloroplast);GO:0009536(plastid);GO:0009707(chloroplast outer membrane);GO:0015031(protein transport);GO:0016020(membrane);GO:0016021(integral component of membrane);GO:0016817(hydrolase activity, acting on acid anhydrides);GO:0045036(protein targeting to chloroplast);GO:0046872(metal ion binding)	NA	NA	NA	PREDICTED: translocase of chloroplast 120, chloroplastic-like [Pyrus x bretschneideri]	25.7457	66.2732	2.57414	1.36409	0.0230373	0.183543
D8674_037950	gnl|WGS:SMOL|Pdr0g014650.1	GO:0005509(calcium ion binding);GO:0005634(nucleus)	NA	NA	NA	PREDICTED: uncharacterized protein LOC103948869 [Pyrus x bretschneideri]	5.68019	14.6958	2.58719	1.37139	0.0230404	0.183543
D8674_009458	gnl|WGS:SMOL|Pdr13g001380.1	GO:0003677(DNA binding);GO:0003700(DNA binding transcription factor activity);GO:0005515(protein binding);GO:0005634(nucleus);GO:0006351(transcription, DNA-templated);GO:0006355(regulation of transcription, DNA-templated);GO:0006952(defense response);GO:0042803(protein homodimerization activity);GO:0045892(negative regulation of transcription, DNA-templated);GO:0050777(negative regulation of immu…	NA	NA	NA	PREDICTED: trihelix transcription factor ASR3-like [Pyrus x bretschneideri]	4.56255	11.8567	2.59869	1.37778	0.0230719	0.18367
D8674_019994	gnl|WGS:SMOL|Pdr17g019240.1	GO:0003674(molecular_function);GO:0008150(biological_process)	03040(Spliceosome);04141(Protein processing in endoplasmic reticulum);04144(Endocytosis)	K03283	NA	PREDICTED: uncharacterized protein LOC103959935 [Pyrus x bretschneideri]	7.00808	18.1698	2.5927	1.37445	0.0231669	0.184012
D8674_032468	gnl|WGS:SMOL|Pdr8g000140.1	NA	NA	NA	NA	hypothetical protein DVH24_020572 [Malus domestica]	2.50716	6.76553	2.69848	1.43215	0.0231727	0.184012
D8674_040856	gnl|WGS:SMOL|Pdr0g043710.1	GO:0003735(structural constituent of ribosome);GO:0006412(translation)	NA	NA	NA	PREDICTED: ADP,ATP carrier protein ER-ANT1-like [Pyrus x bretschneideri]	10.8589	28.031	2.58139	1.36815	0.0231763	0.184012
D8674_029878	gnl|WGS:SMOL|Pdr6g016860.1	GO:0000977(RNA polymerase II regulatory region sequence-specific DNA binding);GO:0003677(DNA binding);GO:0003700(DNA binding transcription factor activity);GO:0005515(protein binding);GO:0005634(nucleus);GO:0006351(transcription, DNA-templated);GO:0006355(regulation of transcription, DNA-templated);GO:0009908(flower development);GO:0009933(meristem structural organization);GO:0010076(maintenance …	NA	NA	NA	PREDICTED: truncated transcription factor CAULIFLOWER A-like isoform X1 [Pyrus x bretschneideri]	3.45919	8.97313	2.594	1.37518	0.0231789	0.184012
D8674_013207	gnl|WGS:SMOL|Pdr15g004990.1	GO:0003677(DNA binding);GO:0003700(DNA binding transcription factor activity);GO:0005634(nucleus);GO:0006351(transcription, DNA-templated);GO:0006355(regulation of transcription, DNA-templated);GO:0006970(response to osmotic stress);GO:0009737(response to abscisic acid);GO:0009738(abscisic acid-activated signaling pathway);GO:0009749(response to glucose);GO:0009788(negative regulation of abscisic…	03040(Spliceosome)	K12900	NA	PREDICTED: ethylene-responsive transcription factor ABR1-like [Pyrus x bretschneideri]	4.48399	11.6818	2.60521	1.3814	0.0231901	0.184012
D8674_014547	gnl|WGS:SMOL|Pdr15g018390.1	GO:0005634(nucleus);GO:0008150(biological_process)	NA	NA	NA	PREDICTED: uncharacterized protein LOC103400461 [Malus domestica]	4.85423	12.5773	2.591	1.37351	0.0232182	0.184135
D8674_016053	gnl|WGS:SMOL|Pdr16g004580.1	GO:0003333(amino acid transmembrane transport);GO:0015171(amino acid transmembrane transporter activity)	NA	NA	NA	PREDICTED: probable sodium-coupled neutral amino acid transporter 6 [Pyrus x bretschneideri]	2.33689	6.14078	2.62776	1.39383	0.0232816	0.184483
D8674_016294	gnl|WGS:SMOL|Pdr16g006990.1	NA	NA	NA	NA	-	38.8561	100.242	2.57982	1.36727	0.0233116	0.184499
D8674_001241	gnl|WGS:SMOL|Pdr1g012410.1	GO:0005515(protein binding);GO:0005737(cytoplasm);GO:0009408(response to heat);GO:0009644(response to high light intensity);GO:0010286(heat acclimation);GO:0042542(response to hydrogen peroxide)	04141(Protein processing in endoplasmic reticulum)	K13993	NA	hypothetical protein DVH24_023013 [Malus domestica]	11.757	30.4381	2.58894	1.37236	0.0233451	0.184499
D8674_042629	gnl|WGS:SMOL|Pdr0g061440.1	GO:0000275(mitochondrial proton-transporting ATP synthase complex, catalytic core F(1));GO:0005739(mitochondrion);GO:0006754(ATP biosynthetic process)	00190(Oxidative phosphorylation)	K02132	NA	PREDICTED: uncharacterized protein LOC108866220 [Pyrus x bretschneideri]	3.4079	8.83614	2.59284	1.37453	0.0233464	0.184499
D8674_001188	gnl|WGS:SMOL|Pdr1g011880.1	GO:0002229(defense response to oomycetes);GO:0004674(protein serine/threonine kinase activity);GO:0005524(ATP binding);GO:0005886(plasma membrane);GO:0006468(protein phosphorylation);GO:0016021(integral component of membrane);GO:0016301(kinase activity);GO:0030246(carbohydrate binding);GO:0042742(defense response to bacterium)	NA	NA	NA	PREDICTED: L-type lectin-domain containing receptor kinase S.4-like [Pyrus x bretschneideri]	11.736	30.2033	2.57357	1.36377	0.0233925	0.184509
D8674_011645	gnl|WGS:SMOL|Pdr14g008820.1	GO:0000209(protein polyubiquitination);GO:0005634(nucleus);GO:0005737(cytoplasm);GO:0006511(ubiquitin-dependent protein catabolic process);GO:0031625(ubiquitin protein ligase binding);GO:0061630(ubiquitin protein ligase activity)	04120(Ubiquitin mediated proteolysis)	K10583	EC:2.3.2.23	PREDICTED: ubiquitin-conjugating enzyme E2 22-like isoform X1 [Pyrus x bretschneideri]	37.7851	97.0294	2.56793	1.3606	0.0234611	0.184742
D8674_004937	gnl|WGS:SMOL|Pdr11g001980.1	GO:0005096(GTPase activator activity);GO:0005737(cytoplasm)	NA	NA	NA	PREDICTED: rho GTPase-activating protein 2 [Pyrus x bretschneideri]	3.78557	9.79781	2.5882	1.37195	0.0235072	0.184884
D8674_023514	gnl|WGS:SMOL|Pdr4g000870.1	NA	NA	NA	NA	PREDICTED: U11/U12 small nuclear ribonucleoprotein 48 kDa protein [Pyrus x bretschneideri]	10.4761	26.9195	2.5696	1.36154	0.0235085	0.184884
D8674_016884	gnl|WGS:SMOL|Pdr16g012890.1	GO:0005643(nuclear pore);GO:0005654(nucleoplasm);GO:0005829(cytosol);GO:0006607(NLS-bearing protein import into nucleus);GO:0008139(nuclear localization sequence binding)	NA	NA	NA	PREDICTED: importin subunit alpha-2 [Malus domestica]	98.7326	253.152	2.56402	1.35841	0.0235208	0.184903
D8674_031523	gnl|WGS:SMOL|Pdr7g014470.1	GO:0003674(molecular_function);GO:0005634(nucleus);GO:0008150(biological_process)	00350(Tyrosine metabolism);00360(Phenylalanine metabolism);00380(Tryptophan metabolism);00901(Indole alkaloid biosynthesis);00950(Isoquinoline alkaloid biosynthesis);00965(Betalain biosynthesis)	K01593	EC:4.1.1.28;EC:4.1.1.105	PREDICTED: uncharacterized protein LOC103948371 [Pyrus x bretschneideri]	1.9475	5.16857	2.65396	1.40814	0.0235398	0.184919
D8674_005038	gnl|WGS:SMOL|Pdr11g002990.1	GO:0005634(nucleus);GO:0005737(cytoplasm)	NA	NA	NA	PREDICTED: ARM REPEAT PROTEIN INTERACTING WITH ABF2-like [Pyrus x bretschneideri]	1.25438	3.31225	2.64055	1.40084	0.0235425	0.184919
D8674_025146	gnl|WGS:SMOL|Pdr4g017190.1	GO:0003677(DNA binding);GO:0003700(DNA binding transcription factor activity);GO:0005634(nucleus)	NA	NA	NA	PREDICTED: RNA polymerase I termination factor-like [Pyrus x bretschneideri]	13.8503	35.5492	2.56668	1.3599	0.023571	0.185067
D8674_026712	gnl|WGS:SMOL|Pdr5g011880.1	GO:0006405(RNA export from nucleus);GO:0006606(protein import into nucleus);GO:0017056(structural constituent of nuclear pore);GO:0044611(nuclear pore inner ring)	03013(RNA transport)	K14311	NA	PREDICTED: nucleoporin NUP188 homolog [Pyrus x bretschneideri]	2.42903	6.25599	2.5755	1.36485	0.0236122	0.185313
D8674_006705	gnl|WGS:SMOL|Pdr11g019660.1	GO:0003677(DNA binding);GO:0003723(RNA binding);GO:0003727(single-stranded RNA binding);GO:0005739(mitochondrion);GO:0008150(biological_process);GO:0008270(zinc ion binding);GO:0009507(chloroplast);GO:0043231(intracellular membrane-bounded organelle);GO:1990825(sequence-specific mRNA binding)	NA	NA	NA	PREDICTED: pentatricopeptide repeat-containing protein At3g46870-like [Pyrus x bretschneideri]	1.58065	4.18313	2.64647	1.40407	0.0236387	0.185443
D8674_023663	gnl|WGS:SMOL|Pdr4g002360.1	GO:0000045(autophagosome assembly);GO:0000422(autophagy of mitochondrion);GO:0005829(cytosol);GO:0006497(protein lipidation);GO:0019898(extrinsic component of membrane);GO:0032266(phosphatidylinositol-3-phosphate binding);GO:0034045(phagophore assembly site membrane);GO:0034497(protein localization to phagophore assembly site);GO:0044804(autophagy of nucleus);GO:0080025(phosphatidylinositol-3,5-b…	NA	NA	NA	PREDICTED: autophagy-related protein 18a isoform X1 [Pyrus x bretschneideri]	3.31827	8.6294	2.60057	1.37883	0.023675	0.185574
D8674_002754	gnl|WGS:SMOL|Pdr10g009080.1	GO:0003676(nucleic acid binding);GO:0005737(cytoplasm);GO:0008276(protein methyltransferase activity)	NA	NA	NA	PREDICTED: hemK methyltransferase family member 2-like [Pyrus x bretschneideri]	1.0148	2.75218	2.71204	1.43938	0.0237431	0.185953
D8674_019820	gnl|WGS:SMOL|Pdr17g017500.1	GO:0000462(maturation of SSU-rRNA from tricistronic rRNA transcript (SSU-rRNA, 5.8S rRNA, LSU-rRNA));GO:0005730(nucleolus);GO:0032040(small-subunit processome);GO:0070181(small ribosomal subunit rRNA binding)	NA	NA	NA	PREDICTED: rRNA-processing protein UTP23 homolog isoform X1 [Pyrus x bretschneideri]	7.03909	18.1791	2.58259	1.36882	0.0237682	0.185996
D8674_004487	gnl|WGS:SMOL|Pdr10g026410.1	GO:0004693(cyclin-dependent protein serine/threonine kinase activity);GO:0005515(protein binding);GO:0005524(ATP binding);GO:0005886(plasma membrane);GO:0016301(kinase activity)	NA	NA	NA	PREDICTED: probable serine/threonine-protein kinase At1g54610 [Pyrus x bretschneideri]	0.9781	2.66781	2.72754	1.4476	0.0238409	0.186333
D8674_005823	gnl|WGS:SMOL|Pdr11g010840.1	GO:0005515(protein binding);GO:0005739(mitochondrion);GO:0005829(cytosol);GO:0006535(cysteine biosynthetic process from serine);GO:0008270(zinc ion binding);GO:0009001(serine O-acetyltransferase activity);GO:0009507(chloroplast);GO:0019344(cysteine biosynthetic process);GO:0046686(response to cadmium ion)	00920(Sulfur metabolism);00270(Cysteine and methionine metabolism)	K00640	EC:2.3.1.30	chloroplast-like serine acetyltransferase 1 [Pyrus pyrifolia]	50.3036	128.632	2.5571	1.35451	0.023891	0.186647
D8674_027900	gnl|WGS:SMOL|Pdr5g023760.1	NA	NA	NA	NA	hypothetical protein DVH24_011517 [Malus domestica]	5.73611	15.1782	2.64608	1.40386	0.023901	0.186647
D8674_012612	gnl|WGS:SMOL|Pdr14g018490.1	GO:0005515(protein binding);GO:0005524(ATP binding);GO:0005634(nucleus);GO:0005737(cytoplasm);GO:0005829(cytosol);GO:0009408(response to heat);GO:0009570(chloroplast stroma);GO:0009644(response to high light intensity);GO:0009941(chloroplast envelope);GO:0016887(ATPase activity);GO:0019538(protein metabolic process);GO:0042542(response to hydrogen peroxide);GO:0043335(protein unfolding);GO:004572…	NA	NA	NA	hypothetical protein DVH24_023724 [Malus domestica]	2.78217	7.16094	2.57387	1.36394	0.0239122	0.186658
D8674_029398	gnl|WGS:SMOL|Pdr6g012060.1	GO:0008270(zinc ion binding);GO:0009507(chloroplast);GO:0016787(hydrolase activity)	00240(Pyrimidine metabolism)	K01493	EC:3.5.4.12	hypothetical protein DVH24_039800 [Malus domestica]	5.15788	13.4705	2.61164	1.38495	0.0239228	0.186663
D8674_034044	gnl|WGS:SMOL|Pdr8g015900.1	GO:0005886(plasma membrane);GO:0016324(apical plasma membrane);GO:0051819(induction by symbiont of nodulation, tumor or growth in host)	NA	NA	NA	PREDICTED: flotillin-like protein 4 [Pyrus x bretschneideri]	4.60459	11.8883	2.58184	1.3684	0.0239421	0.186737
D8674_019880	gnl|WGS:SMOL|Pdr17g018100.1	GO:0003910(DNA ligase (ATP) activity);GO:0005737(cytoplasm);GO:0006273(lagging strand elongation);GO:0051103(DNA ligation involved in DNA repair)	03030(DNA replication);03410(Base excision repair);03420(Nucleotide excision repair);03430(Mismatch repair)	K10747	EC:6.5.1.1;EC:6.5.1.6	hypothetical protein DVH24_030944 [Malus domestica]	2.63064	6.80807	2.58799	1.37183	0.0240174	0.187218
D8674_031430	gnl|WGS:SMOL|Pdr7g013540.1	GO:0004674(protein serine/threonine kinase activity);GO:0005886(plasma membrane)	NA	NA	NA	hypothetical protein DVH24_023931 [Malus domestica]	2.26978	5.97597	2.63284	1.39662	0.0240263	0.187218
D8674_041744	gnl|WGS:SMOL|Pdr0g052590.1	GO:0003674(molecular_function);GO:0005634(nucleus);GO:0008150(biological_process)	NA	NA	NA	PREDICTED: uncharacterized protein LOC103947831 [Pyrus x bretschneideri]	13.1479	33.6332	2.55808	1.35506	0.0240535	0.187296
D8674_038617	gnl|WGS:SMOL|Pdr0g021320.1	NA	NA	NA	NA	hypothetical protein DVH24_013872 [Malus domestica]	0.559876	1.50229	2.68325	1.42398	0.0241111	0.187667
D8674_007041	gnl|WGS:SMOL|Pdr11g023020.1	GO:0003674(molecular_function);GO:0005737(cytoplasm);GO:0009553(embryo sac development);GO:0048316(seed development)	NA	NA	NA	hypothetical protein DVH24_041936 [Malus domestica]	0.282901	0.761395	2.69138	1.42835	0.0242219	0.188451
D8674_000308	gnl|WGS:SMOL|Pdr1g003080.1	GO:0003674(molecular_function);GO:0005634(nucleus);GO:0008150(biological_process)	NA	NA	NA	PREDICTED: uncharacterized protein LOC103402033 [Malus domestica]	4.48737	11.7258	2.61308	1.38575	0.0243179	0.188965
D8674_037759	gnl|WGS:SMOL|Pdr0g012740.1	GO:0003674(molecular_function);GO:0005634(nucleus);GO:0005730(nucleolus);GO:0006364(rRNA processing);GO:0008150(biological_process)	NA	NA	NA	PREDICTED: uncharacterized protein LOC103958752 [Pyrus x bretschneideri]	4.36181	11.2671	2.58313	1.36912	0.024334	0.189012
D8674_034643	gnl|WGS:SMOL|Pdr9g001020.1	GO:0000302(response to reactive oxygen species);GO:0003674(molecular_function);GO:0005737(cytoplasm);GO:0005782(peroxisomal matrix);GO:0006457(protein folding);GO:0009408(response to heat)	04141(Protein processing in endoplasmic reticulum)	K13993	NA	PREDICTED: 15.7 kDa heat shock protein, peroxisomal-like [Pyrus x bretschneideri]	64.0705	163.305	2.54884	1.34984	0.0243898	0.189352
D8674_033540	gnl|WGS:SMOL|Pdr8g010860.1	GO:0000977(RNA polymerase II regulatory region sequence-specific DNA binding);GO:0001085(RNA polymerase II transcription factor binding);GO:0001228(transcriptional activator activity, RNA polymerase II transcription regulatory region sequence-specific DNA binding);GO:0003682(chromatin binding);GO:0005634(nucleus);GO:0005667(transcription factor complex);GO:0030154(cell differentiation)	NA	NA	NA	PREDICTED: GATA transcription factor 24-like isoform X1 [Pyrus x bretschneideri]	3.17931	8.26374	2.59922	1.37808	0.0244624	0.189546
D8674_036344	gnl|WGS:SMOL|Pdr9g018030.1	GO:0005634(nucleus);GO:0016787(hydrolase activity)	NA	NA	NA	hypothetical protein DVH24_031677 [Malus domestica]	2.92588	7.56611	2.58592	1.37068	0.0245089	0.189575
D8674_017350	gnl|WGS:SMOL|Pdr16g017550.1	GO:0003674(molecular_function);GO:0005575(cellular_component);GO:0008150(biological_process)	03440(Homologous recombination)	K12173	NA	PREDICTED: thaumatin-like protein 1b [Pyrus x bretschneideri]	21.4255	54.6982	2.55295	1.35216	0.0245141	0.189575
D8674_020678	gnl|WGS:SMOL|Pdr2g006360.1	GO:0005737(cytoplasm);GO:0005739(mitochondrion);GO:0005975(carbohydrate metabolic process);GO:0006099(tricarboxylic acid cycle);GO:0006107(oxaloacetate metabolic process);GO:0006108(malate metabolic process);GO:0006734(NADH metabolic process);GO:0008746(NAD(P)+ transhydrogenase activity);GO:0009507(chloroplast);GO:0009570(chloroplast stroma);GO:0009579(thylakoid);GO:0009941(chloroplast envelope);…	00620(Pyruvate metabolism);00710(Carbon fixation in photosynthetic organisms)	K00051	EC:1.1.1.82	PREDICTED: malate dehydrogenase [NADP], chloroplastic-like [Pyrus x bretschneideri]	16.3768	41.6862	2.54544	1.34791	0.0246612	0.190067
D8674_032078	gnl|WGS:SMOL|Pdr7g020020.1	GO:0003674(molecular_function);GO:0008150(biological_process);GO:0009507(chloroplast)	NA	NA	NA	hypothetical protein DVH24_022597 [Malus domestica]	4.22884	11.0102	2.6036	1.38051	0.024761	0.190757
D8674_039745	gnl|WGS:SMOL|Pdr0g032600.1	GO:0005737(cytoplasm);GO:0005773(vacuole);GO:0005794(Golgi apparatus);GO:0005829(cytosol);GO:0005886(plasma membrane);GO:0008270(zinc ion binding);GO:0009507(chloroplast);GO:0009535(chloroplast thylakoid membrane);GO:0009706(chloroplast inner membrane);GO:0009941(chloroplast envelope);GO:0016491(oxidoreductase activity);GO:0055114(oxidation-reduction process)	NA	NA	NA	PREDICTED: putative quinone-oxidoreductase homolog, chloroplastic [Pyrus x bretschneideri]	129.831	329.651	2.53907	1.3443	0.0247797	0.190824
D8674_038059	gnl|WGS:SMOL|Pdr0g015740.1	GO:0003676(nucleic acid binding);GO:0003723(RNA binding)	NA	NA	NA	PREDICTED: KH domain-containing protein HEN4 isoform X1 [Pyrus x bretschneideri]	4.2454	10.8507	2.55588	1.35382	0.0249487	0.19189
D8674_021105	gnl|WGS:SMOL|Pdr2g010630.1	GO:0005509(calcium ion binding)	03013(RNA transport)	K03257	NA	PREDICTED: eukaryotic initiation factor 4A-like [Pyrus x bretschneideri]	23.5198	59.8416	2.54431	1.34728	0.0251346	0.192879
D8674_007746	gnl|WGS:SMOL|Pdr12g004540.1	GO:0004722(protein serine/threonine phosphatase activity);GO:0005515(protein binding);GO:0005886(plasma membrane);GO:0006470(protein dephosphorylation);GO:0009414(response to water deprivation);GO:0045926(negative regulation of growth);GO:0046872(metal ion binding);GO:1904526(regulation of microtubule binding)	NA	NA	NA	hypothetical protein DVH24_036540 [Malus domestica]	0.549397	1.50553	2.74034	1.45435	0.0251751	0.19296
D8674_016092	gnl|WGS:SMOL|Pdr16g004970.1	GO:0003674(molecular_function);GO:0005739(mitochondrion);GO:0009734(auxin-activated signaling pathway)	NA	NA	NA	PREDICTED: protein BIG GRAIN 1-like E [Malus domestica]	6.16126	15.6978	2.54782	1.34926	0.0251799	0.19296
D8674_008721	gnl|WGS:SMOL|Pdr12g014290.1	NA	NA	NA	NA	PREDICTED: putative pentatricopeptide repeat-containing protein At2g02150 isoform X1 [Malus domestica]	0.843266	2.23148	2.64624	1.40394	0.0252786	0.193324
D8674_026412	gnl|WGS:SMOL|Pdr5g008880.1	GO:0004842(ubiquitin-protein transferase activity);GO:0008270(zinc ion binding);GO:0008299(isoprenoid biosynthetic process);GO:0009414(response to water deprivation);GO:0010025(wax biosynthetic process);GO:0010143(cutin biosynthetic process);GO:0010345(suberin biosynthetic process);GO:0030176(integral component of endoplasmic reticulum membrane);GO:0030433(ubiquitin-dependent ERAD pathway);GO:004…	04141(Protein processing in endoplasmic reticulum)	K10661	EC:2.3.2.27	PREDICTED: probable E3 ubiquitin ligase SUD1 [Malus domestica]	64.133	162.179	2.52879	1.33845	0.0253094	0.193466
D8674_028405	gnl|WGS:SMOL|Pdr6g002130.1	GO:0005634(nucleus);GO:0005886(plasma membrane);GO:0016021(integral component of membrane)	NA	NA	NA	PREDICTED: uncharacterized protein LOC103962508 [Pyrus x bretschneideri]	20.3251	51.4682	2.53224	1.34042	0.0253604	0.193632
D8674_039079	gnl|WGS:SMOL|Pdr0g025940.1	GO:0005515(protein binding);GO:0005524(ATP binding);GO:0005576(extracellular region);GO:0006952(defense response);GO:0043531(ADP binding)	03040(Spliceosome)	K12818	EC:3.6.4.13	PREDICTED: putative disease resistance RPP13-like protein 1 [Pyrus x bretschneideri]	0.508372	1.3369	2.62977	1.39494	0.0253835	0.193632
D8674_034045	gnl|WGS:SMOL|Pdr8g015910.1	GO:0005886(plasma membrane);GO:0016324(apical plasma membrane);GO:0051819(induction by symbiont of nodulation, tumor or growth in host)	NA	NA	NA	PREDICTED: flotillin-like protein 4 [Pyrus x bretschneideri]	1.33684	3.49744	2.6162	1.38747	0.0253835	0.193632
D8674_025973	gnl|WGS:SMOL|Pdr5g004490.1	NA	NA	NA	NA	PREDICTED: uncharacterized protein LOC103963702 [Pyrus x bretschneideri]	2.76538	7.50853	2.71519	1.44105	0.0253906	0.193632
D8674_020046	gnl|WGS:SMOL|Pdr2g000040.1	GO:0001673(male germ cell nucleus);GO:0004861(cyclin-dependent protein serine/threonine kinase inhibitor activity);GO:0005515(protein binding);GO:0005634(nucleus);GO:0005654(nucleoplasm);GO:0007050(cell cycle arrest);GO:0016301(kinase activity);GO:0016310(phosphorylation);GO:0030332(cyclin binding);GO:0045736(negative regulation of cyclin-dependent protein serine/threonine kinase activity)	NA	NA	NA	PREDICTED: cyclin-dependent kinase inhibitor 7-like [Pyrus x bretschneideri]	4.5732	11.6541	2.54835	1.34956	0.025443	0.193953
D8674_021621	gnl|WGS:SMOL|Pdr3g004210.1	GO:0004553(hydrolase activity, hydrolyzing O-glycosyl compounds);GO:0030247(polysaccharide binding);GO:0046658(anchored component of plasma membrane)	00500(Starch and sucrose metabolism)	K19891	EC:3.2.1.39	PREDICTED: glucan endo-1,3-beta-glucosidase 14-like isoform X1 [Malus domestica]	4.26792	11.0207	2.58221	1.36861	0.0255279	0.194365
D8674_026689	gnl|WGS:SMOL|Pdr5g011650.1	GO:0003723(RNA binding);GO:0004519(endonuclease activity);GO:0009451(RNA modification);GO:0009507(chloroplast);GO:0048255(mRNA stabilization)	NA	NA	NA	PREDICTED: pentatricopeptide repeat-containing protein MRL1, chloroplastic [Pyrus x bretschneideri]	7.19256	18.2008	2.53051	1.33943	0.0255407	0.194383
D8674_009105	gnl|WGS:SMOL|Pdr12g018130.1	NA	NA	NA	NA	PREDICTED: LRR receptor-like serine/threonine-protein kinase GSO2 [Pyrus x bretschneideri]	2.43208	6.33388	2.60431	1.3809	0.0255558	0.194397
D8674_006694	gnl|WGS:SMOL|Pdr11g019550.1	GO:0005385(zinc ion transmembrane transporter activity);GO:0005773(vacuole);GO:0010043(response to zinc ion);GO:0016020(membrane);GO:0061088(regulation of sequestering of zinc ion)	NA	NA	NA	PREDICTED: metal tolerance protein B-like [Pyrus x bretschneideri]	115.084	290.455	2.52386	1.33563	0.025563	0.194397
D8674_008311	gnl|WGS:SMOL|Pdr12g010190.1	NA	NA	NA	NA	-	7.80295	20.6728	2.64935	1.40564	0.0256099	0.194596
D8674_001700	gnl|WGS:SMOL|Pdr1g017000.1	GO:0000398(mRNA splicing, via spliceosome);GO:0003723(RNA binding);GO:0005681(spliceosomal complex)	03040(Spliceosome)	K12827	NA	PREDICTED: splicing factor 3A subunit 3 [Malus domestica]	7.22083	18.2952	2.53367	1.34123	0.0257129	0.195143
D8674_000600	gnl|WGS:SMOL|Pdr1g006000.1	NA	NA	NA	NA	-	4.07196	10.8253	2.6585	1.41061	0.025886	0.19595
D8674_029215	gnl|WGS:SMOL|Pdr6g010230.1	NA	04016(MAPK signaling pathway - plant);04626(Plant-pathogen interaction)	K13424	NA	PREDICTED: uncharacterized protein LOC103949291 [Pyrus x bretschneideri]	5.80333	14.7396	2.53986	1.34475	0.025937	0.196033
D8674_005119	gnl|WGS:SMOL|Pdr11g003800.1	GO:0051213(dioxygenase activity)	NA	NA	NA	hypothetical protein DVH24_027028 [Malus domestica]	1.3303	3.61375	2.7165	1.44175	0.0261795	0.197414
D8674_013074	gnl|WGS:SMOL|Pdr15g003660.1	GO:0003723(RNA binding);GO:0005739(mitochondrion);GO:0008150(biological_process);GO:0008270(zinc ion binding)	NA	NA	NA	hypothetical protein DVH24_042654 [Malus domestica]	1.00015	2.58134	2.58096	1.36791	0.0262808	0.197861
D8674_031810	gnl|WGS:SMOL|Pdr7g017340.1	GO:0003333(amino acid transmembrane transport);GO:0015171(amino acid transmembrane transporter activity)	NA	NA	NA	PREDICTED: probable sodium-coupled neutral amino acid transporter 6 [Pyrus x bretschneideri]	1.39522	3.6356	2.60576	1.3817	0.026335	0.198059
D8674_042781	gnl|WGS:SMOL|Pdr0g062960.1	GO:0008150(biological_process);GO:0009507(chloroplast);GO:0009536(plastid);GO:0009941(chloroplast envelope);GO:0016021(integral component of membrane);GO:0031969(chloroplast membrane)	NA	NA	NA	PREDICTED: protein FATTY ACID EXPORT 2, chloroplastic-like [Pyrus x bretschneideri]	10.2844	25.9545	2.52369	1.33553	0.0263495	0.198059
D8674_027464	gnl|WGS:SMOL|Pdr5g019400.1	GO:0003938(IMP dehydrogenase activity);GO:0005829(cytosol);GO:0006177(GMP biosynthetic process);GO:0009735(response to cytokinin);GO:0046872(metal ion binding);GO:0055114(oxidation-reduction process)	00230(Purine metabolism)	K00088	EC:1.1.1.205	PREDICTED: inosine-5'-monophosphate dehydrogenase 2-like [Pyrus x bretschneideri]	35.8468	90.038	2.51174	1.32869	0.02635	0.198059
D8674_030410	gnl|WGS:SMOL|Pdr7g003340.1	GO:0005634(nucleus)	04141(Protein processing in endoplasmic reticulum)	K09503	NA	hypothetical protein PRUPE_2G072900 [Prunus persica]	946.036	2372.02	2.50733	1.32615	0.0264536	0.198237
D8674_012165	gnl|WGS:SMOL|Pdr14g014020.1	GO:0000973(posttranscriptional tethering of RNA polymerase II gene DNA at nuclear periphery);GO:0003723(RNA binding);GO:0006405(RNA export from nucleus);GO:0006606(protein import into nucleus);GO:0008139(nuclear localization sequence binding);GO:0017056(structural constituent of nuclear pore);GO:0034398(telomere tethering at nuclear periphery);GO:0044614(nuclear pore cytoplasmic filaments)	03013(RNA transport)	K14297	NA	PREDICTED: nuclear pore complex protein NUP98A isoform X1 [Pyrus x bretschneideri]	31.2687	78.4462	2.50878	1.32699	0.0264568	0.198237
D8674_037297	gnl|WGS:SMOL|Pdr0g008120.1	GO:0000977(RNA polymerase II regulatory region sequence-specific DNA binding);GO:0003677(DNA binding);GO:0003700(DNA binding transcription factor activity);GO:0005515(protein binding);GO:0005634(nucleus);GO:0006351(transcription, DNA-templated);GO:0006355(regulation of transcription, DNA-templated);GO:0009908(flower development);GO:0009933(meristem structural organization);GO:0010076(maintenance …	NA	NA	NA	PREDICTED: truncated transcription factor CAULIFLOWER A-like [Pyrus x bretschneideri]	5.66047	14.3272	2.53109	1.33976	0.0265183	0.198461
D8674_012973	gnl|WGS:SMOL|Pdr15g002650.1	GO:0003938(IMP dehydrogenase activity);GO:0005737(cytoplasm);GO:0005829(cytosol);GO:0006177(GMP biosynthetic process);GO:0046872(metal ion binding);GO:0055114(oxidation-reduction process)	00230(Purine metabolism)	K00088	EC:1.1.1.205	PREDICTED: inosine-5'-monophosphate dehydrogenase 2-like [Malus domestica]	4.39282	11.5539	2.63019	1.39517	0.0265413	0.198476
D8674_013630	gnl|WGS:SMOL|Pdr15g009220.1	GO:0005515(protein binding);GO:0005634(nucleus);GO:0005737(cytoplasm);GO:0009816(defense response to bacterium, incompatible interaction);GO:0031348(negative regulation of defense response);GO:0042742(defense response to bacterium);GO:0043231(intracellular membrane-bounded organelle);GO:0045892(negative regulation of transcription, DNA-templated);GO:0048471(perinuclear region of cytoplasm)	NA	NA	NA	hypothetical protein DVH24_030128 [Malus domestica]	23.8216	59.7025	2.50624	1.32552	0.0266535	0.199115
D8674_035185	gnl|WGS:SMOL|Pdr9g006440.1	GO:0009055(electron transfer activity);GO:0009507(chloroplast);GO:0009535(chloroplast thylakoid membrane);GO:0009773(photosynthetic electron transport in photosystem I);GO:0010598(NAD(P)H dehydrogenase complex (plastoquinone));GO:0046872(metal ion binding);GO:0051537(2 iron, 2 sulfur cluster binding)	NA	NA	NA	PREDICTED: photosynthetic NDH subunit of subcomplex B 3, chloroplastic [Pyrus x bretschneideri]	1.67218	4.37231	2.61473	1.38666	0.0267291	0.199485
D8674_028582	gnl|WGS:SMOL|Pdr6g003900.1	GO:0003674(molecular_function);GO:0005634(nucleus);GO:0008150(biological_process)	NA	NA	NA	hypothetical protein DVH24_035789 [Malus domestica]	8.5927	21.607	2.51458	1.33031	0.0268241	0.199866
D8674_002603	gnl|WGS:SMOL|Pdr10g007570.1	GO:0003677(DNA binding);GO:0005634(nucleus);GO:0005739(mitochondrion);GO:0006355(regulation of transcription, DNA-templated);GO:0007275(multicellular organism development);GO:0009299(mRNA transcription);GO:0009416(response to light stimulus);GO:0090698(post-embryonic plant morphogenesis)	04016(MAPK signaling pathway - plant);04075(Plant hormone signal transduction);04626(Plant-pathogen interaction)	K13413	EC:2.7.12.2	PREDICTED: protein G1-like1 [Pyrus x bretschneideri]	7.64244	19.2946	2.52467	1.33609	0.0268366	0.199866
D8674_011692	gnl|WGS:SMOL|Pdr14g009290.1	GO:0005634(nucleus);GO:0030246(carbohydrate binding)	NA	NA	NA	hypothetical protein DVH24_004804 [Malus domestica]	19.9588	50.0282	2.50657	1.32571	0.0268596	0.199878
D8674_000327	gnl|WGS:SMOL|Pdr1g003270.1	GO:0005634(nucleus);GO:0005886(plasma membrane);GO:0009641(shade avoidance);GO:0060918(auxin transport)	NA	NA	NA	PREDICTED: uncharacterized protein LOC103931922 isoform X3 [Pyrus x bretschneideri]	0.740098	1.91897	2.59286	1.37454	0.0269696	0.200566
D8674_002244	gnl|WGS:SMOL|Pdr10g003980.1	GO:0004252(serine-type endopeptidase activity);GO:0005777(peroxisome);GO:0016485(protein processing)	NA	NA	NA	PREDICTED: glyoxysomal processing protease, glyoxysomal [Pyrus x bretschneideri]	29.193	72.9935	2.50038	1.32215	0.0270038	0.200662
D8674_016454	gnl|WGS:SMOL|Pdr16g008590.1	GO:0003674(molecular_function);GO:0005634(nucleus);GO:0008150(biological_process)	NA	NA	NA	PREDICTED: cell wall integrity and stress response component 1 [Pyrus x bretschneideri]	12.6413	31.7597	2.51238	1.32905	0.0270398	0.20085
D8674_014205	gnl|WGS:SMOL|Pdr15g014970.1	GO:0000790(nuclear chromatin);GO:0003677(DNA binding);GO:0005634(nucleus);GO:0006260(DNA replication);GO:0006281(DNA repair);GO:0006310(DNA recombination);GO:0007131(reciprocal meiotic recombination);GO:0007141(male meiosis I);GO:0009555(pollen development);GO:0046872(metal ion binding);GO:0048232(male gamete generation);GO:0051026(chiasma assembly)	03030(DNA replication);03420(Nucleotide excision repair);03430(Mismatch repair);03440(Homologous recombination)	K07466	NA	PREDICTED: replication protein A 70 kDa DNA-binding subunit A-like [Pyrus x bretschneideri]	9.99518	25.0025	2.50146	1.32277	0.0270837	0.201018
D8674_030912	gnl|WGS:SMOL|Pdr7g008360.1	GO:0003674(molecular_function);GO:0005774(vacuolar membrane);GO:0008150(biological_process)	NA	NA	NA	PREDICTED: uncharacterized protein LOC103957913 [Pyrus x bretschneideri]	45.5979	113.851	2.49686	1.32011	0.0271921	0.201608
D8674_032177	gnl|WGS:SMOL|Pdr7g021010.1	GO:0005515(protein binding)	04141(Protein processing in endoplasmic reticulum);04626(Plant-pathogen interaction)	K04079	NA	PREDICTED: heat shock protein 83 [Pyrus x bretschneideri]	35.2887	88.0874	2.49619	1.31973	0.0271971	0.201608
D8674_013085	gnl|WGS:SMOL|Pdr15g003770.1	GO:0005634(nucleus)	NA	NA	NA	PREDICTED: uncharacterized protein LOC103931210 [Pyrus x bretschneideri]	8.94462	22.3767	2.50169	1.3229	0.0272059	0.201608
D8674_016389	gnl|WGS:SMOL|Pdr16g007940.1	GO:0005737(cytoplasm)	NA	NA	NA	PREDICTED: serine/threonine-protein kinase fray2-like isoform X1 [Malus domestica]	12.1767	30.4778	2.50296	1.32363	0.0272238	0.201661
D8674_001414	gnl|WGS:SMOL|Pdr1g014140.1	GO:0003723(RNA binding);GO:0005515(protein binding);GO:0005634(nucleus);GO:0005681(spliceosomal complex);GO:0006397(mRNA processing);GO:0008270(zinc ion binding);GO:0008380(RNA splicing);GO:0009737(response to abscisic acid);GO:0009738(abscisic acid-activated signaling pathway)	NA	NA	NA	PREDICTED: branchpoint-bridging protein-like [Pyrus x bretschneideri]	36.7855	91.7607	2.49448	1.31874	0.0272691	0.201856
D8674_021031	gnl|WGS:SMOL|Pdr2g009890.1	GO:0005515(protein binding);GO:0005737(cytoplasm);GO:0008219(cell death);GO:0008289(lipid binding);GO:0009751(response to salicylic acid);GO:0009816(defense response to bacterium, incompatible interaction);GO:0010175(sphingosine transmembrane transporter activity);GO:0120009(intermembrane lipid transfer);GO:0120013(intermembrane lipid transfer activity)	NA	NA	NA	hypothetical protein DVH24_042015 [Malus domestica]	0.624992	1.68133	2.69016	1.42769	0.0272715	0.201856
D8674_004829	gnl|WGS:SMOL|Pdr11g000900.1	GO:0004842(ubiquitin-protein transferase activity);GO:0005515(protein binding);GO:0005634(nucleus);GO:0009585(red, far-red light phototransduction);GO:0010099(regulation of photomorphogenesis);GO:0016567(protein ubiquitination);GO:0048366(leaf development);GO:0048573(photoperiodism, flowering)	NA	NA	NA	PREDICTED: phytochrome A-associated F-box protein-like [Malus domestica]	7.14878	17.9413	2.5097	1.32752	0.0272867	0.20189
D8674_042685	gnl|WGS:SMOL|Pdr0g062000.1	GO:0003677(DNA binding);GO:0003700(DNA binding transcription factor activity);GO:0005515(protein binding);GO:0005634(nucleus);GO:0006351(transcription, DNA-templated);GO:0006355(regulation of transcription, DNA-templated);GO:0009733(response to auxin);GO:0009734(auxin-activated signaling pathway);GO:0010150(leaf senescence);GO:0042802(identical protein binding);GO:0045892(negative regulation of t…	04075(Plant hormone signal transduction)	K14486	NA	PREDICTED: auxin response factor 1 [Pyrus x bretschneideri]	6.61967	16.5974	2.50729	1.32613	0.0273149	0.202019
D8674_031658	gnl|WGS:SMOL|Pdr7g015820.1	GO:0005515(protein binding);GO:0005737(cytoplasm);GO:0009408(response to heat);GO:0009644(response to high light intensity);GO:0010286(heat acclimation);GO:0042542(response to hydrogen peroxide)	04141(Protein processing in endoplasmic reticulum)	K13993	NA	PREDICTED: 16.9 kDa class I heat shock protein 2-like [Pyrus x bretschneideri]	3.16928	8.09637	2.55464	1.35312	0.0273702	0.202207
D8674_040991	gnl|WGS:SMOL|Pdr0g045060.1	GO:0003824(catalytic activity);GO:0009507(chloroplast);GO:0016829(lyase activity)	NA	NA	NA	PREDICTED: uncharacterized protein LOC103940914 [Pyrus x bretschneideri]	34.8546	87.0159	2.49654	1.31993	0.0273725	0.202207
D8674_000542	gnl|WGS:SMOL|Pdr1g005420.1	GO:0043161(proteasome-mediated ubiquitin-dependent protein catabolic process);GO:0061630(ubiquitin protein ligase activity)	NA	NA	NA	hypothetical protein DVH24_014559 [Malus domestica]	4.32545	10.8702	2.51309	1.32946	0.0274128	0.202426
D8674_035469	gnl|WGS:SMOL|Pdr9g009280.1	GO:0005886(plasma membrane);GO:0008150(biological_process)	00562(Inositol phosphate metabolism);04070(Phosphatidylinositol signaling system);04933(AGE-RAGE signaling pathway in diabetic complications)	K05857	EC:3.1.4.11	hypothetical protein DVH24_000538 [Malus domestica]	3.73863	9.38616	2.51059	1.32803	0.0274622	0.202632
D8674_007139	gnl|WGS:SMOL|Pdr11g024000.1	GO:0005524(ATP binding);GO:0005739(mitochondrion);GO:0006952(defense response);GO:0043531(ADP binding)	04626(Plant-pathogen interaction)	K13459	NA	PREDICTED: probable disease resistance protein At4g27220 [Pyrus x bretschneideri]	0.549228	1.42841	2.60076	1.37893	0.0274782	0.202671
D8674_022842	gnl|WGS:SMOL|Pdr3g016420.2	GO:0005634(nucleus);GO:0016567(protein ubiquitination);GO:0043161(proteasome-mediated ubiquitin-dependent protein catabolic process);GO:0061630(ubiquitin protein ligase activity)	NA	NA	NA	PREDICTED: probable E3 ubiquitin-protein ligase BAH1-like 1 isoform X1 [Pyrus x bretschneideri]	46.9282	116.845	2.48986	1.31607	0.0275697	0.202984
D8674_003995	gnl|WGS:SMOL|Pdr10g021490.1	GO:0005515(protein binding);GO:0005634(nucleus);GO:0005829(cytosol);GO:0009507(chloroplast);GO:0009793(embryo development ending in seed dormancy);GO:0010183(pollen tube guidance);GO:0036033(mediator complex binding);GO:0050832(defense response to fungus)	NA	NA	NA	PREDICTED: CCG-binding protein 1-like [Pyrus x bretschneideri]	349.782	870.351	2.48827	1.31514	0.0275745	0.202984
D8674_034753	gnl|WGS:SMOL|Pdr9g002120.1	GO:0003746(translation elongation factor activity);GO:0005739(mitochondrion);GO:0006414(translational elongation)	NA	NA	NA	PREDICTED: elongation factor Ts, mitochondrial [Pyrus x bretschneideri]	9.85261	24.5841	2.49519	1.31915	0.0278004	0.204246
D8674_014747	gnl|WGS:SMOL|Pdr15g020390.1	GO:0009507(chloroplast);GO:0015979(photosynthesis)	NA	NA	NA	PREDICTED: uncharacterized protein LOC103956007 isoform X1 [Pyrus x bretschneideri]	4.15731	10.3897	2.49915	1.32144	0.0278515	0.204412
D8674_008229	gnl|WGS:SMOL|Pdr12g009370.1	GO:0003674(molecular_function);GO:0005575(cellular_component);GO:0008150(biological_process)	NA	NA	NA	PREDICTED: uncharacterized protein LOC103941607 [Pyrus x bretschneideri]	49.8255	123.865	2.48598	1.31382	0.0279034	0.204607
D8674_033167	gnl|WGS:SMOL|Pdr8g007130.1	GO:0004823(leucine-tRNA ligase activity);GO:0005829(cytosol);GO:0006429(leucyl-tRNA aminoacylation)	00970(Aminoacyl-tRNA biosynthesis)	K01869	EC:6.1.1.4	PREDICTED: leucine--tRNA ligase, cytoplasmic-like [Pyrus x bretschneideri]	69.9425	173.54	2.48118	1.31103	0.0280004	0.204999
D8674_001613	gnl|WGS:SMOL|Pdr1g016130.1	GO:0003674(molecular_function);GO:0005575(cellular_component);GO:0015031(protein transport)	NA	NA	NA	PREDICTED: uncharacterized protein LOC103966151 [Pyrus x bretschneideri]	5.1674	12.913	2.49893	1.32131	0.0280749	0.20545
D8674_015784	gnl|WGS:SMOL|Pdr16g001890.1	GO:0004553(hydrolase activity, hydrolyzing O-glycosyl compounds);GO:0005576(extracellular region);GO:0005618(cell wall);GO:0010154(fruit development);GO:0010411(xyloglucan metabolic process);GO:0016762(xyloglucan:xyloglucosyl transferase activity);GO:0016798(hydrolase activity, acting on glycosyl bonds);GO:0042546(cell wall biogenesis);GO:0048046(apoplast);GO:0071555(cell wall organization);GO:00…	NA	NA	NA	PREDICTED: probable xyloglucan endotransglucosylase/hydrolase protein 28 [Pyrus x bretschneideri]	102.755	254.772	2.47942	1.31001	0.0281344	0.205581
D8674_042196	gnl|WGS:SMOL|Pdr0g057110.1	GO:0004103(choline kinase activity);GO:0005524(ATP binding);GO:0005737(cytoplasm);GO:0016310(phosphorylation)	00564(Glycerophospholipid metabolism)	K14156	EC:2.7.1.32;EC:2.7.1.82	PREDICTED: probable choline kinase 2 isoform X1 [Pyrus x bretschneideri]	4.51752	11.2741	2.49565	1.31942	0.0282236	0.206154
D8674_016581	gnl|WGS:SMOL|Pdr16g009860.1	GO:0000398(mRNA splicing, via spliceosome);GO:0004004(ATP-dependent RNA helicase activity);GO:0005681(spliceosomal complex);GO:0005737(cytoplasm)	03040(Spliceosome)	K12815	EC:3.6.4.13	hypothetical protein DVH24_033821 [Malus domestica]	23.3485	57.7933	2.47525	1.30757	0.0284018	0.207054
D8674_004226	gnl|WGS:SMOL|Pdr10g023800.1	GO:0004310(farnesyl-diphosphate farnesyltransferase activity);GO:0005783(endoplasmic reticulum);GO:0005789(endoplasmic reticulum membrane);GO:0005886(plasma membrane);GO:0006696(ergosterol biosynthetic process);GO:0008299(isoprenoid biosynthetic process);GO:0016021(integral component of membrane);GO:0016126(sterol biosynthetic process);GO:0016491(oxidoreductase activity);GO:0045338(farnesyl dipho…	00100(Steroid biosynthesis);00909(Sesquiterpenoid and triterpenoid biosynthesis)	K00801	EC:2.5.1.21	PREDICTED: squalene synthase-like [Pyrus x bretschneideri]	34.341	85.0198	2.47575	1.30787	0.0284623	0.207376
[truncated: 314 more rows]

## Sheet: 20-Down-DEGs-Pear
Gene_id	Transcript_id	GO	KEGG	KO_ENTRY	EC	Description	FPKM.Control-Pear	FPKM.Waxed-Pear	FC	Log2FC	PValue	qval
[truncated: 1,898 more rows]
