# Supplementary material for: The molecular mechanism on suppression of climacteric fruit ripening with postharvest wax coating treatment via transcriptome
Source: Front Plant Sci. 2022 Aug 15;13:978013. doi: 10.3389/fpls.2022.978013 (PMC9421051; doi:10.3389/fpls.2022.978013)
Supplement: Supplementary file 6 [file Table_6.XLSX]

## Sheet: Plant hormone-related DEGs
Transcript ID	Annotation	Ragulation	Log2FC
Auxin related
gnl|WGS:SMOL|Pdr5g024650.1	protein TRANSPORT INHIBITOR RESPONSE 1-like (TIR1)	UP	1.16238
gnl|WGS:SMOL|Pdr10g011730.1	auxin-induced protein AUX28-like (AUX/IAA)	DOWN	-3.01095
gnl|WGS:SMOL|Pdr13g006900.1	auxin-induced protein 22D (AUX/IAA)	DOWN	-1.77586
gnl|WGS:SMOL|Pdr5g014360.1	auxin-responsive protein IAA11 (AUX/IAA)	DOWN	-1.71436
gnl|WGS:SMOL|Pdr15g024850.1	auxin-responsive protein IAA2-like (AUX/IAA)	UP	1.32845
gnl|WGS:SMOL|Pdr0g035460.1	auxin-induced protein AUX28-like (AUX/IAA)	UP	1.26295
gnl|WGS:SMOL|Pdr4g001810.1	auxin-responsive protein IAA16 (AUX/IAA)	UP	1.19771
gnl|WGS:SMOL|Pdr0g062000.1	auxin response factor 1 (ARF)	UP	1.32613
gnl|WGS:SMOL|Pdr15g009320.1	probable indole-3-acetic acid-amido synthetase GH3.1 (GH3)	UP	3.92011
gnl|WGS:SMOL|Pdr5g009650.1	probable indole-3-acetic acid-amido synthetase GH3.1 (GH3)	DOWN	-3.01067
gnl|WGS:SMOL|Pdr10g024460.1	auxin-induced protein 15A-like (SAUR)	UP	1.77054
gnl|WGS:SMOL|Pdr5g005060.1	indole-3-acetic acid-induced protein ARG7-like (SAUR)	DOWN	-1.81458
gnl|WGS:SMOL|Pdr10g024290.1	auxin-induced protein 15A-like (SAUR)	DOWN	-1.84959
gnl|WGS:SMOL|Pdr7g008050.1	auxin-responsive protein SAUR36-like (SAUR)	DOWN	-1.70957
Abscisic acid related
gnl|WGS:SMOL|Pdr7g017190.1	PREDICTED: abscisic acid receptor PYL4	UP	2.46389
gnl|WGS:SMOL|Pdr7g012080.1	PREDICTED: abscisic acid receptor PYL9-like	UP	1.18544
gnl|WGS:SMOL|Pdr7g021920.1	PREDICTED: probable protein phosphatase 2C 51	DOWN	-3.27098
gnl|WGS:SMOL|Pdr0g001680.1	PREDICTED: protein phosphatase 2C 77	DOWN	-2.28241
gnl|WGS:SMOL|Pdr14g001860.1	protein ABSCISIC ACID-INSENSITIVE 5-like	DOWN	-2.2549
gnl|WGS:SMOL|Pdr10g006180.1	9-cis-epoxycarotenoid dioxygenase 3	DOWN	-4.87568
Cytokinin related
gnl|WGS:SMOL|Pdr9g012570.1	hypothetical protein DVH24_032453	UP	1.78822
gnl|WGS:SMOL|Pdr3g015530.1	histidine-containing phosphotransfer protein 1	UP	1.41154
gnl|WGS:SMOL|Pdr15g019720.1	two-component response regulator ARR12-like	DOWN	-1.70742
gnl|WGS:SMOL|Pdr12g013780.1	two-component response regulator ORR10-like	UP	2.08886
Gibberellin related
gnl|WGS:SMOL|Pdr2g002770.1	probable carboxylesterase 8	DOWN	-2.70251
gnl|WGS:SMOL|Pdr15g011790.1	scarecrow-like protein 15	UP	1.69834
gnl|WGS:SMOL|Pdr12g005710.1	transcription factor PIF3-like	DOWN	-1.89798
gnl|WGS:SMOL|Pdr10g011570.1	gibberellin 2-beta-dioxygenase 1-like	DOWN	-1.91583
Ethylene related
gnl|WGS:SMOL|Pdr16g011730.1	S-adenosylmethionine synthetase (metK)	DOWN	-3.57114
gnl|WGS:SMOL|Pdr13g001770.1	S-adenosylmethionine synthase 2-like (metK)	DOWN	-3.34313
gnl|WGS:SMOL|Pdr1g006850.1	1-aminocyclopropane-1-carboxylic acid synthase (ACS)	DOWN	-5.73275
gnl|WGS:SMOL|Pdr15g008370.1	1-aminocyclopropane-1-carboxylic acid synthase (ACS)	DOWN	-4.67474
gnl|WGS:SMOL|Pdr9g013220.1	1-aminocyclopropane-1-carboxylate oxidase (ACO)	DOWN	-7.68092
gnl|WGS:SMOL|Pdr17g006110.1	1-aminocyclopropane-1-carboxylate oxidase (ACO)	DOWN	-5.56946
gnl|WGS:SMOL|Pdr17g006120.1	1-aminocyclopropane-1-carboxylate oxidase (ACO)	DOWN	-4.70176
gnl|WGS:SMOL|Pdr10g000350.1	1-aminocyclopropane-1-carboxylate oxidase 1 (ACO)	DOWN	-2.72484
gnl|WGS:SMOL|Pdr5g025760.1	1-aminocyclopropane-1-carboxylate oxidase 2 (ACO)	DOWN	-2.69006
gnl|WGS:SMOL|Pdr15g015520.1	1-aminocyclopropane-1-carboxylate oxidase 1 (ACO)	DOWN	-1.58314
gnl|WGS:SMOL|Pdr8g002450.1	ethylene-responsive transcription factor ERF003 (ERF)	DOWN	-5.41102
gnl|WGS:SMOL|Pdr7g018590.1	ethylene-responsive transcription factor ERF106 (ERF)	UP	2.93276
gnl|WGS:SMOL|Pdr11g001260.1	ethylene-responsive transcription factor ERF071-like (ERF)	UP	2.42379
gnl|WGS:SMOL|Pdr1g013850.1	ethylene-responsive transcription factor 1-like (ERF)	UP	2.52242
gnl|WGS:SMOL|Pdr1g007550.1	ethylene-responsive transcription factor ERF023-like (ERF)	DOWN	-2.22846
gnl|WGS:SMOL|Pdr4g015080.1	ethylene-responsive transcription factor 5-like (ERF)	UP	1.8472
gnl|WGS:SMOL|Pdr6g004620.1	ethylene-responsive transcription factor 2-like (ERF)	DOWN	-2.13884
gnl|WGS:SMOL|Pdr1g013860.1	ethylene-responsive transcription factor ERF105-like (ERF)	UP	1.72244
gnl|WGS:SMOL|Pdr13g001320.1	ethylene-responsive transcription factor ERF113-like (ERF)	DOWN	-1.90971
gnl|WGS:SMOL|Pdr14g019340.1	ethylene-responsive transcription factor ERF118-like (ERF)	UP	1.56767
gnl|WGS:SMOL|Pdr16g010940.1	ethylene-responsive transcription factor ERF113-like (ERF)	DOWN	-1.76665
gnl|WGS:SMOL|Pdr10g004070.1	ethylene-responsive transcription factor 4 (ERF)	DOWN	-1.62595
gnl|WGS:SMOL|Pdr3g016810.1	ethylene-responsive transcription factor ERF073-like (ERF)	UP	1.2612
gnl|WGS:SMOL|Pdr7g005880.1	ethylene-responsive transcription factor ERF034-like (ERF)	DOWN	-1.56232

## Sheet: Chl, carotenoids-related DEG
Transcript ID	Annotation	Ragulation	Log2FC
chlorophyll related
gnl|WGS:SMOL|Pdr12g015200.1	magnesium-chelatase subunit ChlH (ChlH)	UP	2.10467
gnl|WGS:SMOL|Pdr14g006560.1	magnesium-chelatase subunit ChlH (ChlH)	UP	1.73333
gnl|WGS:SMOL|Pdr12g012780.1	magnesium-protoporphyrin IX monomethyl ester [oxidative] cyclase（MPEC）	UP	2.75913
gnl|WGS:SMOL|Pdr11g006850.1	protochlorophyllide reductase(POR)	UP	2.60473
gnl|WGS:SMOL|Pdr3g012420.1	protochlorophyllide reductase(POR)	UP	1.40882
gnl|WGS:SMOL|Pdr8g014970.1	chlorophyllide a oxygenase, chloroplastic(CAO)	UP	1.20233
carotenoids related
gnl|WGS:SMOL|Pdr9g010960.1	phytoene synthase 2 (PSY)	DOWN	-1.65595
gnl|WGS:SMOL|Pdr1g015960.1	beta-carotene hydroxylase 2 (CHYB)	DOWN	-2.18457
gnl|WGS:SMOL|Pdr6g008370.1	beta-carotene hydroxylase 2 (CHYB)	DOWN	-2.09473
gnl|WGS:SMOL|Pdr14g009600.1	carotene epsilon-monooxygenase(LUT1)	DOWN	-3.16425
gnl|WGS:SMOL|Pdr12g001690.1	violaxanthin de-epoxidase (VDE)	UP	2.01853
gnl|WGS:SMOL|Pdr11g014340.1	capsanthin/capsorubin synthase (CCS)	DOWN	-2.28582
gnl|WGS:SMOL|Pdr3g005060.1	capsanthin/capsorubin synthase (CCS)	DOWN	-1.58273
gnl|WGS:SMOL|Pdr10g006180.1	9-cis-epoxycarotenoid dioxygenase 3 (NCED)	DOWN	-4.87568
gnl|WGS:SMOL|Pdr16g007630.1	probable carotenoid cleavage dioxygenase 4 (NCED)	DOWN	-3.55113

## Sheet: Fatty acid related DEGs
Transcript ID	Annotation	Ragulation	Log2FC
Fatty acid biosynthesis related
gnl|WGS:SMOL|Pdr13g009190.1	biotin carboxylase 1 (accC)	DOWN	-1.66346
gnl|WGS:SMOL|Pdr15g005360.1	biotin carboxylase 1 (accC)	DOWN	-1.66967
gnl|WGS:SMOL|Pdr11g021780.1	malonyl CoA-acyl carrier protein transacylase (FabD)	DOWN	-1.49781
gnl|WGS:SMOL|Pdr0g000920.1	3-oxoacyl-[acyl-carrier-protein] synthase II (FabF)	DOWN	-2.29542
gnl|WGS:SMOL|Pdr10g021540.1	3-oxoacyl-[acyl-carrier-protein] synthase II (FabF)	DOWN	-1.80296
gnl|WGS:SMOL|Pdr14g009060.1	3-oxoacyl-[acyl-carrier-protein] reductase (FabG)	DOWN	-1.86917
gnl|WGS:SMOL|Pdr14g008480.1	3-oxoacyl-[acyl-carrier-protein] reductase (FabG)	DOWN	-1.51767
gnl|WGS:SMOL|Pdr0g057970.1	3-hydroxyacyl-[acyl-carrier-protein] dehydratase (FabZ)	DOWN	-1.6124
gnl|WGS:SMOL|Pdr11g024290.1	enoyl-[acyl-carrier-protein] reductase (FabI)	DOWN	-2.36999
gnl|WGS:SMOL|Pdr0g026000.1	enoyl-[acyl-carrier-protein] reductase (FabI)	DOWN	-1.80101
gnl|WGS:SMOL|Pdr0g061740.1	enoyl-[acyl-carrier-protein] reductase (FabI)	DOWN	-1.9541
gnl|WGS:SMOL|Pdr15g018880.1	palmitoyl-acyl carrier protein thioesterase (FATA)	UP	1.165
gnl|WGS:SMOL|Pdr14g011600.1	long chain acyl-CoA synthetase 4-like (ACSL)	UP	2.64798
gnl|WGS:SMOL|Pdr0g030440.2	long chain acyl-CoA synthetase 4-like (ACSL)	UP	2.23723
gnl|WGS:SMOL|Pdr10g021780.1	long chain acyl-CoA synthetase 2-like (ACSL)	UP	1.61894
gnl|WGS:SMOL|Pdr10g027800.1	stearoyl-[acyl-carrier-protein] 9-desaturase 6 (SAD)	UP	1.61555
Fatty acid elongation related
gnl|WGS:SMOL|Pdr0g002380.1	3-ketoacyl-CoA synthase 11 (KCS)	DOWN	-1.68356
gnl|WGS:SMOL|Pdr0g002200.1	3-ketoacyl-CoA synthase 11 (KCS)	DOWN	-1.54715
gnl|WGS:SMOL|Pdr0g007180.1	very-long-chain 3-oxoacyl-CoA reductase 1-like（HSD17B12）	UP	2.47217
gnl|WGS:SMOL|Pdr4g014740.1	palmitoyl-protein thioesterase 1-like(PPT)	DOWN	-2.10044
gnl|WGS:SMOL|Pdr6g004940.1	palmitoyl-protein thioesterase 1-like(PPT)	DOWN	-1.69569
gnl|WGS:SMOL|Pdr5g015280.1	3-ketoacyl-CoA thiolase 2(ACAA2)	DOWN	-2.63867
Fatty acid degradation related
gnl|WGS:SMOL|Pdr6g018620.1	alcohol dehydrogenase-like 6 （ADH）	UP	1.2185
gnl|WGS:SMOL|Pdr15g021210.1	aldehyde dehydrogenase family 3 member H1 (ALDH)	UP	2.54087
gnl|WGS:SMOL|Pdr4g006800.1	acyl-coenzyme A oxidase 4 (ACOX)	UP	1.55318
gnl|WGS:SMOL|Pdr12g007410.1	acyl-coenzyme A oxidase 4 (ACOX)	UP	1.27618
wax biosynthesis related
gnl|WGS:SMOL|Pdr5g008850.1	O-acyltransferase WSD1-like	UP	1.50945
gnl|WGS:SMOL|Pdr0g035780.1	O-acyltransferase WSD1-like	UP	1.45177
gnl|WGS:SMOL|Pdr14g005390.1	FAR	UP	2.05498
